# Supplementary material for: Compartmentalized oskar degradation in the germ plasm safeguards germline development
Source: eLife journal article supplement (doi:10.7554/elife.49988), 2020-01-07
Supplement: supp [file elife-49988-supp-v1.zip]

Archive with 30 entries (30 files):
- elife_poa_e49988_Figure_6_source_data_1.xlsx
- elife_poa_e49988_Figure_7_figure_supplement_1.tif
- elife_poa_e49988_Figure_4_source_data_1.xlsx
- elife_poa_e49988_Figure_4_source_data_2.xlsx
- elife_poa_e49988_Video_1.avi
- elife_poa_e49988_Figure_3_source_data_1.xlsx
- elife_poa_e49988_Figure_2_source_data_4.xlsx
- elife_poa_e49988_Figure_1_figure_supplement_2.tif
- elife_poa_e49988_Figure_8_source_data_1.xlsx
- elife_poa_e49988_Figure_1_figure_supplement_2_source_data_1.xlsx
- elife_poa_e49988_Figure_6_source_data_2.xlsx
- elife_poa_e49988_Transparent_Reporting_File.pdf
- elife_poa_e49988_Figure_5_source_data_1.xlsx
- elife_poa_e49988_Figure_7_figure_supplement_1_source_data_1.xlsx
- elife_poa_e49988_Figure_2_source_data_1.xlsx
- elife_poa_e49988_Figure_3_figure_supplement_1.tif
- elife_poa_e49988_Figure_5_source_data_4.xlsx
- elife_poa_e49988_Figure_1_figure_supplement_1.tif
- elife_poa_e49988_Figure_7_source_data_3.xlsx
- elife_poa_e49988_Figure_1_source_data_1.xlsx
- elife_poa_e49988_Figure_7_source_data_2.xlsx
- elife_poa_e49988_Figure_2_source_data_3.xlsx
- elife_poa_e49988_Figure_3_figure_supplement_1_source_data_1.xlsx
- elife_poa_e49988_Figure_5_source_data_3.xlsx
- elife_poa_e49988_Figure_7_source_data_1.xlsx
- elife_poa_e49988_Figure_5_source_data_2.xlsx
- elife_poa_e49988_Figure_2_source_data_2.xlsx
- elife_poa_e49988_Figure_3_source_data_2.xlsx
- elife_poa_e49988_Figure_4_figure_supplement_1_source_data_1.xlsx
- elife_poa_e49988_Figure_4_figure_supplement_1.tif
