# Supplementary material for: Compartmentalized oskar degradation in the germ plasm safeguards germline development
Source: eLife journal article supplement (doi:10.7554/elife.49988), 2020-01-07
Supplement: supp [file elife-49988-supp-v1.zip › elife_poa_e49988_Figure_1_figure_supplement_2_source_data_1.xlsx]

## Sheet: Sheet1
Figure 1 - supplement 2B
	oskar
	Genotype	Biological Rep	Techincal Rep	Ct	Avg	Copy #	Transcripts per Rpl7 Transcripts		Transcripts per Rpl7 Transcripts
	o∆n	1	1	20.1446	20.2617	63.8796	0.9459		Sample	Bio Rep 1	Bio Rep 2	Bio Rep 3		Avg	StDev
			2	20.5053					o∆n	0.9459	0.920607	1.17255		1.01302	0.138736
			3	20.1353					oM1,139R∆n	1.00968	1.02101	1.04146		1.02405	0.0161072
		2	1	20.2469	20.3705	59.4349	0.920607
			2	20.6018										TTEST
			3	20.2628										0.8978
		3	1	19.2992	19.9822	76.8921	1.17255
			2	20.5162
			3	20.131					Copy number determined using the following standard curves
	oM1,139R∆n	1	1	19.4655	19.3843	114.304	1.00968
			2	19.2386						oskar	y= -1.508ln(x) + 42.729
			3	19.4489
		2	1	19.4135	19.3667	115.648	1.02101			rpL7	y = -1.578ln(x) + 44.403
			2	19.2242
			3	19.4623
		3	1	19.4441	19.3168	119.536	1.04146
			2	19.1227
			3	19.3837
	rpl7
	Genotype	Biological Rep	Techincal Rep	Ct
	o∆n	1	1	19.8494	20.1779	67.5331
			2	20.4823
			3	20.202
		2	1	19.883	20.2458	64.5605
			2	20.5438
			3	20.3105
		3	1	19.8719	20.2222	65.5767
			2	20.5439
			3	20.2508
	oM1,139R∆n	1	1	18.9289	19.3988	113.208
			2	19.7694
			3	19.4982
		2	1	18.9087	19.398	113.268
			2	19.8075
			3	19.4779
		3	1	18.9061	19.3781	114.777
			2	19.7312
			3	19.4969
Figure 1 - supplement 2D
	Sample	wt	o∆n	oM1,139R∆n
	1	648560	1.04335e+06	836134
	2	628965	1.39345e+06	621746
	3	414964	597270	671759
	4	781481	928913	595857
	5	463155	1.1394e+06	425023
	6	371252	944325	429579
	7	625398	782777	568612
	8	227165	667468	825534
	9	885381	1.20408e+06	504938
	10	942859	839168	311023
	11	946696	841428
	Remove outliers based on interquartile range
	Max	946696	1.39345e+06	836134
	Min	227165	597270	311023
	Q1	439060	810972	448419
	Q3	833431	1.09137e+06	659256
	IQR	394372	280400	210837
	High outlier?	FALSE	FALSE	FALSE
	Low outlier?	FALSE	FALSE	FALSE
	Above	1.42499e+06	1.51197e+06	975511
	Below	-152498	390372	132163
	Avg	630534	943785	579021
	StDev	242901	237092	170311
	Ttests
	Array 1	Array 2	p-value
	wt	o∆n	0.00616878	**
	wt	oM1,139R∆n	0.583987	n.s.
