# Supplementary material for: Compartmentalized oskar degradation in the germ plasm safeguards germline development
Source: eLife journal article supplement (doi:10.7554/elife.49988), 2020-01-07
Supplement: supp [file elife-49988-supp-v1.zip › elife_poa_e49988_Figure_1_source_data_1.xlsx]

## Sheet: Sheet1
Figure 1J
	wt			o∆n			oM1,139R∆n
	Sample	Pole Cells		Sample	Pole Cells		Sample	Pole Cells
	1	35		1	30		1	21
	2	22		2	22		2	21
	3	20		3	21		3	27
	4	31		4	26		4	27
	5	38		5	24		5	22
	6	40		6	24		6	20
	7	33		7	31		7	24
	8	26		8	18		8	19
	9	36		9	17		9	32
	10	43		10	28		10	28
	11	32		11	26		11	28
	12	36		12	20		12	35
	13	23		13	23		13	25
	14	36		14	23		14	21
	15	25		15	26		15	23
	Remove outliers based on interquartile range
	Min	20		Min	17		Min	19
	Max	43		Max	31		Max	35
	Q1	25.5		Q1	21.5		Q1	21
	Q3	36		Q3	26		Q3	27.5
	IQR	10.5		IQR	4.5		IQR	6.5
	Above	51.75		Above	32.75		Above	37.25
	Below	9.75		Below	14.75		Below	11.25
	High outlier?	FALSE		High outlier?	FALSE		High outlier?	FALSE
	Low outlier?	FALSE		Low outlier?	FALSE		Low outlier?	FALSE
	Min	20		Min	17		Min	19
	Q1	25.5		Q1	21.5		Q1	21
	Median	33		Median	24		Median	24
	Q3	36		Q3	26		Q3	27.5
	Max	43		Max	31		Max	35
	Avg	31.7333		Avg	23.9333		Avg	24.8667
	StDev	7.01495		StDev	4.04381		StDev	4.61158
				Student's 2 tailed t-test
				array 1	array 2
				wt	o∆n	0.000860377	***
				wt	oM1,139R∆n	0.00369284	**
				o∆n	oM1,139R∆n	0.560347	ns
Figure 1M
		# of embryos
	# of Cells Lost	wt	o∆n	oM1,139R∆n
	0	61	44	51
	1	13	18	42
	2	14	22	19
	3	3	12	12
	4	0	6	8
	>4	0	8	4
	Total	91	110	136
