# Supplementary material for: Compartmentalized oskar degradation in the germ plasm safeguards germline development
Source: eLife journal article supplement (doi:10.7554/elife.49988), 2020-01-07
Supplement: supp [file elife-49988-supp-v1.zip › elife_poa_e49988_Figure_2_source_data_1.xlsx]

## Sheet: Sheet1
Figure 2B
								Average Speed															Average Speed
	Germ Granule particle speeds (µm/sec)							Germ Granules								Founder Granule particle speeds (µm/sec)							Founder Granuels
	Berfore 1	Before 2	Before 3	During 1	During 2	During 3			Before 1	Before 2	Before 3	During 1	During 2	During 3		Berfore 1	Before 2	Before 3	During 1	During 2	During 3			Before 1	Before 2	Before 3	During 1	During 2	During 3
	0.598241	0.685465	0.49471	1.08197	0.663883	1.14993		Avg	0.967577	0.899552	0.930794	0.999672	1.0287	1.02805		1.15698	0.924578	0.733356	0.804721	0.815702	0.869539		Avg	0.998854	0.910539	0.899678	0.862069	0.878581	0.83082
	1.11881	0.555833	1.18938	0.814143	1.56213	1.06222		StDev	0.273608	0.243334	0.251482	0.311761	0.281831	0.29159		0.925853	1.34013	0.974899	0.735852	0.898011	0.989331		StDev	0.314736	0.301888	0.257549	0.249237	0.24905	0.239371
	1.0267	0.874754	0.792997	0.963276	0.928675	0.919334										1.79204	1.31561	1.12847	1.47472	0.49097	0.757836
	1.36133	0.737436	1.00595	0.589812	0.87925	1.4847										0.979285	0.588271	1.11354	0.801265	0.849266	0.66242							Germ vs Founder Ttest
	1.64843	0.853197	1.7712	0.98786	0.98039	0.863123			Before	During						0.433695	0.645918	1.2744	1.23442	0.52048	0.896178			Before	During			Before	During
	0.770562	1.08818	0.912877	1.02228	1.04134	1.21608		Avg	0.932641	1.01881						1.33516	0.429153	1.92652	0.985275	0.512785	0.633484		Avg	0.936357	0.857157		p-value	0.924936	0.000676867
	1.01491	1.10798	0.946624	0.710578	1.27444	1.4261		SEM	0.0196586	0.0095696						0.666934	0.49409	1.28377	1.13137	0.560821	1.0443		SEM	0.0314055	0.0140044			n.s.	***
	1.04644	0.909869	1.07636	1.93469	1.03856	0.968939										0.704652	0.89368	0.766993	1.57756	0.788234	1.04965
	1.05931	0.960317	1.24971	0.734037	1.39753	1.43334										1.24086	1.02704	1.13377	0.65756	0.752611	0.698111
	1.02341	0.633234	1.02484	0.654248	1.31161	1.61079										1.16959	0.557482	0.763272	1.0085	0.685176	0.435198
	0.91317	0.845614	0.939888	0.932323	1.1725	1.28666										0.849289	0.587389	1.28469	0.693352	0.849033	0.976122
	1.12948	0.957946	1.09086	0.910124	1.29064	1.02833										1.45822	1.72695	0.891565	1.50044	0.982378	0.723406
	0.740011	0.687792	1.10398	0.999347	1.01858	0.859026										0.760054	0.815003	0.776885	0.824841	0.853378	0.963763
	0.994647	1.41636	1.10943	0.876054	1.24605	1.49104										1.45362	1.18154	1.11766	0.653572	0.991369	0.63101
	0.506047	0.774317	1.20943	1.23471	1.09899	0.668458										1.25449	0.610482	1.33846	0.682375	1.00941	0.50675
	0.647185	1.03459	0.723959	0.621591	0.938602	0.867489										1.05952	1.1567	1.29573	1.2003	1.08368	0.792743
	1.17719	0.931219	1.47823	0.928852	1.0269	1.046										1.19354	1.64984	0.656466	0.867312	0.424627	0.582364
	1.06823	1.06645	0.863428	0.740954	1.05048	0.886293										1.02114	1.00054	1.66319	0.593194	0.73927	0.89822
	0.952271	1.0123	1.21807	0.97121	0.816164	1.40295										1.27391	0.869706	0.836206	1.15202	0.85207	0.904479
	1.43788	0.898353	1.23728	0.894181	0.714627	0.879725										1.18165	0.835931	1.03026	0.485484	0.911776	0.894729
	1.49755	0.688874	0.563249	0.948033	1.16004	1.24047										1.13628	0.663049	1.35581	0.834238	0.989871	0.652333
	0.642485	0.733255	0.499884	1.52505	0.759368	1.23722										0.710885	0.954918	0.915365	0.995304	0.958657	0.802741
	0.716438	0.904566	0.943551	0.820843	1.52676	1.46594										1.14712	0.901946	0.864869	0.996697	0.659006	0.925489
	1.33161	0.634691	1.27381	0.869313	0.854468	0.626731										1.04279	0.860705	0.740562	0.390073	0.841518	0.887667
	0.672274	0.75278	0.543945	1.13068	1.19654	0.752759										1.03962	1.36511	0.95326	0.950911	0.842943	0.643718
	1.5098	0.776797	0.594974	0.573894	0.919713	1.46274										1.24204	0.655258	0.362897	0.829753	1.19488	0.682599
	0.820655	0.669201	0.775151	1.26781	0.642237	0.937739										1.16581	1.57939	0.699233	0.866803	0.645676	0.441392
	1.09052	0.471333	0.507913	0.709392	1.05091	1.20783										0.82357	1.22772	0.672086	0.674268	1.04558	1.07168
	1.37266	0.424522	0.818484	0.972163	1.54704	1.00337										0.969946	0.992597	0.882869	0.778861	1.2159	0.695332
	0.678406	1.31122	1.48267	0.865997	0.767022	0.872546										0.99209	1.66871	0.710151	0.926404	0.78822	0.628803
	0.835695	1.00717	0.959532	0.447186	0.928353	1.27265										1.49452	1.05953	0.6956	0.546145	0.901928	0.468872
	1.08829	1.14939	0.909814	0.761343	1.14291	0.934331										0.996197	0.591672	0.989936	0.747523	0.852796	0.783078
	0.715395	0.823468	0.693552	0.609295	0.947826	1.48882										0.822607	1.24317	0.873961	0.900789	1.0463	0.59564
	0.61043	0.810899	0.700648	1.13138	1.24598	1.39675										1.55348	0.874803	0.885341	0.771195	0.516511	0.820976
	0.784996	0.592471	0.93393	1.28091	0.804359	0.806164										1.23767	1.35072	1.0785	0.641232	0.910972	0.591257
	0.593528	0.88485	0.917341	0.82485	0.695101	1.33088										1.04577	0.737319	0.967959	0.943677	0.872015	0.95564
	1.01988	0.845643	0.814736	1.0127	0.863644	1.20236										1.6015	1.44521	0.955514	0.991708	0.457261	0.919372
	0.660753	0.716554	0.779953	1.3954	0.724969	1.16822										1.19781	0.575133	0.880679	1.47563	1.48169	1.01777
	0.726926	0.874596	0.470451	0.707615	0.905818	1.07566										1.68109	1.96355	0.775912	1.42121	0.863811	0.722841
	0.818986	0.6033	0.745945	1.41595	0.645122	1.37427										0.971323	0.839875	0.787805	0.780351	0.682728	0.773043
	0.774268	0.876693	1.07891	0.74223	0.953714	1.30127										0.746984	1.52509	2.23363	0.697351	1.02053	0.848805
	0.558852	1.36236	0.949454	0.688989	1.00245	1.02029										0.937347	0.751891	0.803041	0.684173	0.916462	0.768819
	1.39804	1.03974	0.84084	1.28113	1.68166	0.928662										1.53746	1.47827	1.16436	1.15147	0.584695	1.34152
	0.841762	0.992402	0.792142	1.05455	1.14235	1.35703										0.991484	0.808018	0.783831	0.929948	1.00968	0.551308
	0.7403	1.36125	0.673708	1.39058	0.944009	0.921555										0.988868	0.862485	0.789711	1.23062	0.919863	0.917716
	1.06546	1.0716	0.797248	0.798298	0.992496	1.44217										0.752243	0.828931	0.773562	1.18723	0.68176	0.8156
	1.33096	0.447661	1.30823	0.944465	1.25906	1.4073										0.599008	0.653163	0.455672	0.88587	0.941677	0.874844
	0.718583	0.635835	1.00388	0.967152	0.637237	1.17369										1.03335	0.612683	1.27325	0.419311	0.957769	0.79227
	1.22771	0.812545	1.0623	0.827881	1.34206	1.02563										0.864828	1.19397	0.986991	0.951863	0.642737	1.44113
	0.887767	0.837084	0.755538	1.03359	1.24305	1.07281										1.06226	0.777883	1.17856	0.763361	0.875897	0.634127
	0.891469	0.810994	1.22932	1.39964	1.25648	1.5352										1.04345	0.724577	0.651203	1.56837	0.355749	0.647437
	0.849785	0.835278	1.14485	0.443512	1.2981	1.50548										1.02423	1.07887	0.784802	1.22027	0.926773	0.57864
	0.662469	0.50918	1.16729	0.992946	1.01794	1.01427										1.56563	0.863686	1.06285	1.15445	0.740999	1.188
	0.989612	0.511648	0.743058	1.01102	0.993345	1.08881										0.640055	1.60464	1.2647	0.901411	0.770653	0.735695
	1.18802	0.724358	0.804375	0.74072	1.25096	0.692516										0.851949	1.142	0.884722	1.09748	0.895359	1.43606
	0.909565	0.660781	0.845955	1.89597	1.01361	0.767658										0.814808	0.521648	0.78203	1.2237	0.774184	0.93882
	0.809392	0.808318	1.20027	0.94463	0.941263	1.25523										0.983609	0.929013	0.654808	0.711758	0.602931	0.828127
	0.778497	0.982813	1.2992	0.69591	1.18265	0.692479										1.10458	0.91399	0.622543	0.606475	0.665989	0.823128
	0.655116	1.02404	0.739637	1.62677	0.954659	1.15714										0.844475	0.819101	0.746089	0.6611	0.885076	0.667083
	0.662092	0.74437	1.12229	1.29065	1.02493	1.40937										1.19208	1.06314	1.30221	1.10421	0.650404	0.740165
	0.525655	0.920078	0.830709	1.78362	1.08003	1.09195										0.970716	0.713125	0.834176	1.02818	1.05173	0.96635
	1.01423	0.861017	0.792416	0.809253	0.6505	0.971045										1.19975	0.841023	0.878115	2.28329	1.18507	0.732544
	1.18218	0.901305	1.08143	0.79143	1.09635	1.03086										0.919292	1.37079	0.324653	0.868213	0.611061	0.910537
	1.43167	0.637445	0.98022	0.926664	0.761668	0.897967										1.26328	0.606852	0.70051	2.48054	0.811636	0.50158
	0.442601	0.63086	0.727386	1.39084	0.931842	0.885988										0.666793	1.01917	1.25008	0.882842	1.05537	0.819152
	0.682705	0.412622	0.880301	0.799754	1.3512	0.953955										0.949237	0.866746	0.631805	0.787833	0.833487	0.619098
	0.93151	0.741372	0.942562	0.943307	1.14319	0.759114										0.900768	1.09347	0.595739	0.635354	1.07562	0.761905
	1.0799	1.05499	1.31783	0.432961	1.06852	1.31443										1.00643	1.28849	0.821715	0.715599	0.972757	0.752401
	0.664359	0.903247	0.663805	1.05773	1.13283	0.828788										1.29656	1.39801	0.528948	0.565936	0.749105	1.05958
	0.84348	1.14132	1.07944	1.00328	1.13597	0.899579										0.512726	0.701284	0.793318	0.734494	0.827439	0.642784
	0.607262	0.936918	0.907713	1.00082	0.755575	0.884327										0.731883	1.28933	1.03467	1.19857	0.905806	0.500495
	0.939587	0.899582	1.56194	1.06102	1.37747	0.770219										1.20259	0.810921	0.830637	0.842184	0.907381	0.724972
	0.870045	0.586404	1.59058	0.43036	1.04479	0.993652										0.966996	0.745883	0.564647	0.660348	0.77916	0.831687
	0.926951	1.28824	0.75707	1.98083	0.72306	0.877296										0.912397	1.34091	0.886408	0.758728	0.706372	0.792541
	0.943257	1.23012	0.878397	0.931998	0.742932	1.12309										1.59713	0.830532	1.05146	0.704904	0.614688	0.575444
	1.02317	1.20753	1.03788	0.731935	1.48421	0.745578										1.05731	0.972584	0.545466	0.723197	0.471817	0.43113
	0.680075	1.12789	1.23882	0.800805	0.955333	1.20605										1.15004	0.930161	1.28489	0.803554	0.680468	0.925413
	1.47449	0.753121	0.775946	1.03937	0.810728	0.928006										0.802312	0.637518	1.06851	1.15044	0.580056	0.814606
	1.27455	1.02871	0.635507	0.934933	0.91226	0.83145										1.52872	1.63215	0.706846	1.12436	1.38476	0.668849
	0.944852	1.11611	1.00458	0.678819	0.711333	1.01381										0.955875	0.62288	0.578518	1.0594	0.567198	0.33149
	0.612627	0.923067	0.749873	1.21876	2.01946	1.31031										1.0005	1.1608	0.732576	0.823924	1.03122	0.784004
	0.492803	0.823067	1.44569	0.800785	1.08876	1.0407										1.44566	0.936788	1.35549	1.16362	0.845203	1.1142
	1.38471	1.2886	1.21826	0.887268	1.02518	0.925533										1.16522	1.89228	1.82658	0.685147	0.828575	0.867704
	0.797031	0.766186	1.0867	1.93982	1.10666	1.19301										0.922131	0.841043	0.734608	0.995468	1.20091	0.999638
	0.765541	1.00688	0.82204	0.810336	1.01299	1.04451										0.901318	0.70045	1.2212	0.700971	0.635986	0.771259
	0.904406	0.744241	0.516141	0.607318	1.49082	0.809573										0.887167	1.44683	0.842466	0.780435	0.795598	0.875533
	1.3829	1.0518	0.860023	0.847395	1.22896	1.15406										2.03577	1.02617	1.13867	0.489755	0.803665	0.589899
	0.82093	0.927371	0.645302	0.85067	1.14085	0.950577										0.687093	0.680377	1.09034	1.06703	0.535192	1.15564
	0.872693	1.75249	0.576706	0.49329	0.737049	0.912032										1.06966	0.945604	1.11658	0.800688	0.616324	0.666619
	0.698233	0.863041	1.23842	0.703846	0.579569	0.699052										1.34586	0.688507	1.03773	1.04453	0.7572	0.980743
	0.875301	0.880999	1.13919	0.56934	1.44195	1.21996										1.30019	0.587765	1.21531	1.51796	0.74784	1.05319
	0.636499	0.824277	0.931104	1.1633	1.54952	1.05161										1.19165	0.927014	0.900643	0.66457	0.679476	0.37543
	0.740425	1.27189	0.686358	1.01589	1.34871	1.11773										1.50929	0.877008	0.770982	0.493092	0.91687	0.759817
	0.874817	0.709851	0.574558	0.928973	0.687502	1.03616										0.756803	1.37023	0.529755	0.900972	0.898477	0.909837
	1.19773	0.755325	0.697887	1.09871	1.29602	1.84069										1.46482	0.952886	1.249	0.693893	1.0651	1.11256
	1.10966	0.719441	0.989081	1.04387	0.39491	1.12521										0.666005	0.659216	0.441204	0.722096	0.785325	1.00941
	1.85812	0.752564	0.938774	0.869202	1.3979	1.01089										0.819948	1.05848	0.71928	0.707858	0.80872	0.943779
	1.03354	1.14894	0.882845	0.708205	0.734345	1.241										0.448365	0.448929	0.646717	1.29759	0.847024	0.820446
	0.78591	0.852549	0.964944	1.55336	1.03815	1.19589										0.426642	0.733611	0.794041	1.2986	0.692455	0.832116
	0.976313	0.910276	1.31071	1.83071	0.577099	1.17679										0.861244	1.77127	0.953341	0.761623	0.616508	0.725773
	0.702328	1.00347	0.746182	1.08964	1.02737	1.06265										1.13574	0.706176	0.841412	0.874153	0.881159	0.781826
	0.881295	1.23148	0.939599	0.970299	1.00127	0.908311										0.891853	1.47849	1.18234	0.840288	1.07189	1.26753
	0.898882	0.54184	1.19463	1.13955	0.954378	0.773478										0.882976	0.861832	0.787284	1.55202	0.66032	0.423764
	0.616099	0.692126	0.78094	1.17483	1.69888	0.687855										0.599211	1.16026	1.01567	0.911629	0.852897	0.760627
	0.840466	0.593248	0.699066	1.87603	1.10486	0.610183										1.09399	0.764383	0.94449	0.592946	0.635032	0.896473
	0.965504	0.946724	1.24056	0.479496	0.507573	0.945856										1.08148	1.00446	0.83471	0.838951	0.688874	0.54694
	0.910174	0.678406	1.30399	0.460856	1.1853	0.894225										1.54406	0.957391	0.633666	0.944087	0.902013	1.30433
	0.834693	0.778064	0.974425	0.467494	0.657134	0.905392										0.832512	1.22366	0.639867	0.615226	0.867982	0.634621
	0.919295	0.696801	0.895618	1.42597	1.16139	1.41847										1.08612	1.02534	0.775585	1.1105	1.0531	0.608676
	0.551373	1.3327	1.19136	0.596939	0.972384	0.591879										1.60076	0.89754	0.918043	0.688108	1.16154	0.719529
	0.637785	0.75149	1.07997	1.38868	1.16016	0.879727										1.15873	0.854896	0.420859	0.909714	0.92995	0.900086
	1.14448	1.1104	1.18229	0.45618	0.614144	0.521182										1.13094	0.649055	0.553511	1.01036	0.73386	0.934122
	0.64836	1.06121	0.892042	1.47366	1.0369	0.995189										0.821674	0.541503	0.918954	0.669751	1.45432	0.830222
	0.603377	0.729217	1.15687	1.37377	1.15672	1.09492										0.954187	1.03484	0.811142	1.05657	0.862539	0.904436
	1.21001	0.67556	0.652589	0.840795	1.2559	1.05169										1.06088	1.1653	0.668298	0.749285	1.11741	1.5963
	1.05974	0.770729	0.998014	1.26847	1.10447	0.853843										0.797427	1.07405	0.75271	0.704969	0.720518	0.790377
	0.877293	0.749092	1.15437	1.13392	1.01616	0.75854										1.44223	0.468864	0.697877	0.693738	0.534549	0.592984
	0.90427	0.663188	0.78242	0.879036	1.51325	0.62525										0.935413	0.764243	1.36538	0.937577	0.745297	0.992304
	0.770605	0.595936	0.957609	0.583553	1.3445	0.852213										1.17366	0.680184	0.896348	0.677183	0.861247	0.826794
	0.902662	0.801389	0.700477	1.35353	1.11538	0.654249										1.76941	0.70107	0.654357	0.986544	0.814746	0.851949
	0.606081	0.677958	1.0292	1.37864	1.14663	0.893049										1.43885	0.878084	1.39762	0.853915	2.03425	0.608645
	1.20292	0.97464	0.656448	0.824483	0.89123	0.963313										0.824596	0.948656	0.742465	0.826085	0.978957	0.823953
	0.719623	0.852922	0.911885	0.831749	0.82007	1.12515										1.5557	1.17105	0.764515	0.590602	0.973421	0.551233
	0.783235	1.00809	1.15148	0.853287	1.24778	0.659019										0.771953	0.566906	0.643646	0.898847	0.871656	1.12447
	1.23086	1.18105	0.505534	0.81076	0.905071	0.33956										0.576851	0.931853	1.30272	1.70909	0.99653	0.797279
	0.637904	0.530235	0.69061	0.965193	1.10145	1.04114										0.93127	0.713089	0.701661	0.668828	1.49783	0.773839
	0.534467	1.35558	0.959552	0.773739	0.919775	1.01397										0.828247	1.03898	0.686217	0.488116	1.09021	0.561928
	1.2426	1.1885	0.711937	1.04319	1.49438	0.605013										0.926964	0.92142	1.09342	0.854893	0.680914	0.67106
	1.22013	1.14753	0.938409	1.38006	0.70473	0.866293										0.976117	1.1609	0.821587	1.00631	0.463113	0.938635
	1.01649	1.11689	0.891374	1.32185	1.25537	1.08605										1.39053	1.29059	1.26082	1.29002	0.87002	0.883102
	0.745234	0.790936	0.863494	0.826575	1.05843	1.04709										1.48944	1.35913	0.723561	0.849465	0.64761	0.848255
	1.39442	0.688668	0.907801	0.704863	1.05871	1.19519										0.916367	1.61842	0.274367	0.778143	1.13397	0.767789
	1.05747	0.919616	0.79611	0.854355	1.08369	1.65152										0.968961	0.841976	0.86633	0.554763	1.0014	0.650989
	0.607431	0.958106	1.85364	0.77891	1.04391	1.32298										1.0118	0.9727	0.773013	1.6721	0.731771	0.597359
	0.885332	1.47376	1.12156	1.05938	1.0261	0.878745										0.674043	0.822631	1.2659	1.14088	0.441812	0.754279
	0.435362	0.733641	0.778771	1.2244	0.725148	0.906327										1.03913	0.824271	0.877033	1.11657	0.696381	0.649857
	1.28445	0.779076	0.917224	1.33104	1.47275	1.1939										0.645723	1.20412	0.665408	0.443786	0.943463	0.459184
	0.984391	0.765542	0.652197	1.21095	1.0609	0.630164										1.29627	0.874657	0.402175	1.11053	0.542538	0.911337
	1.08976	0.850119	0.920565	1.69197	2.07716	1.08358										0.912574	0.93274	0.738491	0.643183	0.909937	0.921225
	1.04768	0.690538	0.830728	0.963601	1.08364	2.25195										1.58921	0.550353	0.658586	0.823993	1.64627	0.774118
	0.932194	0.676196	0.521708	0.547041	0.573774	0.632683										1.1847	0.849864	1.10702	1.34027	0.525704	0.804788
	1.00504	0.712959	0.892777	0.949938	1.23907	0.790122										0.842265	0.658678	0.834465	0.640864	0.999915	0.673413
	1.3268	0.49167	0.984973	0.581405	0.670575	1.31289										0.57457	1.03337	1.53539	0.839635	1.34458	0.524899
	0.902435	0.901588	1.24541	0.685792	1.45261	1.11214										1.20392	0.855153	0.459136	1.00757	0.571356	0.791891
	1.30255	0.781394	0.883254	1.07459	0.636734	1.05208										0.663222	0.837218	0.590103	0.796842	1.12402	0.847585
	1.404	0.857432	1.20447	0.977685	1.01196	0.999358										1.49265	0.926196	0.927723	0.874242	0.71996	0.837189
	1.13789	1.45443	0.861769	1.03573	0.825681	1.59556										0.953588	0.898648	1.1993	0.835401	0.741407	0.822321
	0.582466	0.783155	0.633366	0.906441	0.738589	1.5476										1.3694	2.06768	1.07222	1.24236	1.30906	0.857418
	1.15235	1.61435	0.756917	0.782685	0.909611	1.29888										1.07138	0.625543	0.559312	0.860008	0.670411	0.893504
	0.85813	1.03625	1.06211	1.07648	0.930102	1.38116										0.620739	0.886715	0.805901	0.626853	0.78715	0.785648
	0.914891	0.689271	0.755047	1.03695	0.918075	0.741333										0.954413	1.00565	1.0737	0.745496	0.72252	1.11729
	0.806636	0.746747	1.22636	0.753604	0.532434	0.734837										0.720549	0.732795	0.751698	0.731464	0.916235	0.729012
	0.679563	0.910422	0.545437	1.25199	1.36805	1.0497										0.846725	1.01977	1.02104	0.471293	0.628082	0.579666
	0.845527	1.19096	1.06066	1.11782	1.0913	0.823647										0.904308	0.622092	1.56546	0.723553	0.667978	0.355087
	0.880533	0.814553	0.888884	1.33833	1.27157	1.12796										1.204	1.21948	0.754515	0.951049	1.11905	0.537932
	0.714586	1.07478	0.785058	1.36997	0.826323	0.625095										0.492065	0.965644	0.593329	0.70257	0.755056	0.497511
	1.39734	0.557243	0.823147	1.17982	0.695889	1.05131										1.00301	1.62635	0.881486	0.582086	0.922049	0.814328
	0.962519	0.914732	0.689589	0.588749	0.829497	1.18993										0.834031	0.786434	0.910485	1.37709	0.598151	0.716467
	0.913492	1.03174	0.916034	0.800761	0.617958	1.12392										1.62143	0.724064	1.21216	0.773746	0.972637	1.52031
	1.05259	1.25978	0.747705	1.1139	0.894015	1.27679										1.38395	1.68145	1.24981	0.881183	1.15828	0.892971
	0.732713	0.853572	1.11922	0.788875	0.946211	1.50736										1.00829	0.810236	0.82608	0.902182	0.855542	0.622271
	0.535089	0.651879	1.02205	0.988633	0.796364	1.17342										0.563404	0.488106	0.889983	0.761087	0.97235	0.913205
	0.705753	0.662525	0.911609	1.01216	0.901418	1.16966										1.46655	0.838491	0.71414	0.872145	0.700085	0.82398
	0.875259	1.00784	1.28923	0.988157	1.3589	1.0852										1.64382	0.805825	0.865294	0.855309	0.750174	0.498919
	1.33337	0.667801	0.91263	1.15874	1.21809	0.582705										0.990715	1.15652	0.681116	0.788867	0.7469	0.745643
	1.02692	0.855841	0.693323	0.589989	1.16183	1.21212										0.491828	1.39068	0.606993	0.963626	1.13271	1.27303
	0.799591	1.01961	1.46861	1.87635	1.07356	1.11612										1.6848	0.450071	0.781549	1.03989	1.17965	1.03071
	0.912116	0.680848	0.792147	1.02255	0.775686	0.771229										1.03602	0.743569	1.04057	0.714111	0.712814	0.806405
	1.00184	0.868068	1.3207	1.09178	0.731261	0.883563										1.33934	1.52389	0.702692	1.04475	0.559319	0.910891
	1.00677	1.02676	1.17487	1.08017	0.759596	1.29551										0.9084	0.667416	1.06022	0.584991	1.17781	0.551109
	1.59876	0.536261	1.39603	0.78955	1.04528	0.883341										0.798455	0.750129	0.820483	0.958338	1.20088	0.962596
	0.679485	1.03882	0.999827	0.981592	0.906646	0.876758										0.949685	0.811234	2.07328	0.7708	0.531785	0.555759
	1.11627	0.983093	0.85305	0.826779	0.967806	0.874077										0.865867	0.96794	0.604769	0.628475	1.0458	0.545743
	0.935342	0.518914	1.12162	1.04187	0.762906	0.89184										0.90656	0.641863	1.16867	0.841881	0.835935	0.984473
	0.582343	0.834315	0.695617	0.928147	1.80252	0.385281										0.683048	0.591796	1.41136	0.855667	1.11474	0.940197
	1.32604	0.874505	1.22397	0.863982	0.927281	0.836673										0.90144	0.817188	0.767903	0.646911	1.08499	0.724186
	1.7839	0.773512	0.916581	0.771491	0.920435	1.03709										0.763578	1.50569	0.624634	0.725259	0.81555	0.676997
	1.00047	0.972239	1.27806	0.91459	1.40773	1.00333										0.862532	0.597293	0.796054	1.31393	0.792773	0.773031
	1.25654	0.848687	0.957359	0.683555	1.36488	1.66221										0.69099	1.27355	1.06405	1.09339	0.608197	0.750974
	0.922848	0.508874	0.852791	0.72136	1.65828	0.874942										0.859287	0.979959	1.68988	0.931196	0.608646	0.740333
	1.19882	0.603109	0.656402	0.851034	1.22005	0.735878										0.517458	0.631958	0.963933	0.949367	0.898015	1.12774
	1.17831	1.12593	0.848184	1.27035	0.696098	1.74313										0.595245	1.38429	0.705195	0.252759	0.778014	0.935552
	0.600381	0.653952	0.602141	2.02108	1.22457	0.911671										0.553031	1.31724	1.30225	0.827796	0.835792	0.827811
	0.921336	0.806843	1.12749	0.892703	1.36748	1.00034										1.14248	0.813807	0.749072	0.79194	0.703857	0.685454
	0.771778	1.01377	0.542119	0.656051	0.703578	1.20083										0.697711	0.545903	0.490673	1.31768	0.856131	0.767733
	0.917975	0.77551	0.630565	1.32012	1.02924	0.459366										0.938328	1.28666	0.650042	0.588793	1.10045	0.739632
	1.23408	0.915094	1.17918	0.499505	0.829906	0.704733										0.774092	1.00764	0.993031	1.12943	0.820381	0.990653
	0.856138	0.600716	0.600143	1.87132	0.713216	0.913854										0.859269	1.71347	1.1557	0.807223	0.959598	1.12184
	1.23219	0.738704	0.866011	1.04565	1.07398	0.681288										0.515075	0.809521	0.987753	0.687456	0.882054	0.918884
	1.23853	0.648776	0.615415	0.600745	1.10048	1.82682										1.8925	1.03885	0.868486	1.01477	0.642268	0.597724
	0.899089	0.93391	0.361548	1.07895	1.07025	1.01621										1.1009	0.617067	0.765226	1.06309	0.616469	0.687992
	0.869162	0.61352	0.915986	0.538467	0.74047	0.800596										1.04068	1.02542	0.868984	0.677267	0.807744	0.709698
	0.919273	0.571418	0.988672	0.818836	1.69878	0.911955										0.677073	1.44027	0.748639	1.01098	0.689196	1.00837
	0.615805	1.21632	1.06052	1.24899	1.05169	0.898787										1.0332	0.477046	0.812521	0.639069	0.819451	1.0123
	0.934307	0.580636	0.87958	1.517	1.10489	0.676182										1.12466	1.01985	0.818797	1.22397	1.00042	0.938222
	0.64554	0.904589	0.726331	0.769046	0.924064	0.96607										0.733022	0.813477	0.760516	0.895296	0.748043	0.739988
	0.770681	0.589906	0.66687	0.814776	0.726607	0.937305										0.450402	1.11702	1.33469	0.746361	0.617491	1.10126
	1.09521	1.70689	0.982348	1.0132	0.792225	0.82943										1.02359	0.677373	1.08029	0.610365	0.692494	0.618289
	0.614782	1.06094	0.942048	1.08837	1.15069	1.09163										0.468083	0.73876	0.543928	0.889879	0.728086	0.687288
	1.06129	1.28011	0.746477	0.700021	0.590315	0.698324										0.867283	0.752565	0.740312	0.569655	0.724897	0.831786
	0.795371	0.730732	1.55979	0.802207	1.63189	1.28178										1.50781	0.523653	0.924601	0.782444	0.671587	1.05484
	1.44917	0.629693	0.974128	1.10715	1.41733	1.5811										0.794072	0.701766	0.888233	0.662256	0.858709	1.3401
	0.820459	0.601138	0.405136	1.19583	1.57447	0.806359										1.07852	0.860499	0.800078	1.00563	0.703042	1.3024
	0.973391	1.51674	1.12436	1.32677	1.13419	0.802112										0.880857	0.722526	1.02912	0.73434	0.87235	0.753123
	1.67275	1.01378	0.705157	0.732552	1.28622	0.908015										1.10854	0.65489	0.541182	1.1751	0.699498	0.93639
	0.8495	1.55154	0.559637	1.18633	1.03415	0.821634										0.544192	0.617202	0.884999	0.912275	1.01199	0.609458
	0.971511	0.715289	0.641512	0.887238	0.876571	0.849899										0.741462	0.938085	1.10208	0.767048	1.17671	0.719919
	0.911233	1.43787	0.780773	1.23538	0.984742	1.10486										0.794441	2.15308	1.10295	0.955828	1.05121	0.599962
	0.749366	1.56197	0.64834	1.07215	0.765645	0.87353										0.798214	1.27689	0.776991	0.698012	0.568705	0.688166
	0.830675	1.02845	1.25759	0.98387	0.757547	0.859252										0.883039	1.33503	0.751112	0.664099	0.935519	0.717285
	1.4129	0.645165	0.856296	0.820107	0.681028	0.946618										1.07805	0.756489	0.944298	0.308449	0.581608	1.1155
	0.671563	0.763258	1.0834	0.93548	0.985551	1.52018										0.675997	0.671498	1.00523	0.811136	0.64802	0.738791
	0.925088	1.02974	1.27153	0.603324	0.800953	0.933139										0.655006	1.16406	0.656369	0.634812	0.853782	0.754164
	1.01235	0.783187	1.12441	0.763656	1.29959	1.28173										1.55021	1.69254	1.42462	0.788408	0.779755	0.684882
	1.03065	0.999859	0.788545	1.07954	0.605965	1.00232										2.13297	0.935419	0.65762	1.58938	1.20445	0.650098
	0.747572	0.656741	0.9671	0.97955	0.719577	1.24414										1.1754	0.946438	0.798662	1.01206	1.35422	0.975978
	0.696753	1.05167	1.0695	0.526296	1.13761	0.680777										0.912727	0.935324	0.861571	0.911432	0.796828	1.01259
	1.00013	0.756666	0.843031	1.11972	0.82468	0.961821										0.762666	0.763771	0.511625	1.30769	0.810032	1.09814
	1.75566	0.556003	1.15737	0.982373	0.761518	0.584534										1.33434	0.62645	1.03956	0.549041	0.784878	0.907188
	0.93761	0.669739	0.796887	1.02936	0.650319	0.855783										1.64909	0.481936	0.880341	0.83567	0.499126	1.68669
	1.047	0.718122	0.784224	0.653173	1.0755	1.89423										0.612294	0.938246	0.705516	0.795736	0.987051	1.083
	0.94428	1.03069	0.647238	1.06322	1.13635	0.702403										0.936028	1.99227	1.12704	0.536391	1.02158	0.590486
	0.589394	1.05993	1.04983	1.18186	0.722337	1.32893										1.02716	0.879776	1.16777	0.786105	1.10456	1.33086
	1.2399	0.773521	0.607263	0.995273	1.50836	1.13254										1.28982	0.776308	0.902572	0.998523	1.11724	1.14445
	0.601172	1.08658	2.08732	0.750879	1.04329	0.582802										0.668588	0.769808	0.725192	0.705462	1.20771	0.809917
	0.834984	0.968405	0.66244	1.01496	1.48945	1.02385										0.718754	1.73969	0.647408	0.772446	0.750133	0.981287
	1.32399	0.452379	0.52931	2.21572	0.89192	0.903882										0.73598	0.249799	0.600712	0.981491	0.55879	1.07712
	0.850078	0.714046	0.793512	1.16243	0.408916	1.47709										1.17135	1.24111	0.885946	0.780708	0.680182	0.99473
	1.00937	0.901933	0.836442	0.82022	0.782163	0.996857										0.995142	0.551432	0.765264	0.586472	1.47641	0.552328
	1.06328	0.67981	0.927704	0.737324	0.777898	0.887813										1.16307	1.07813	0.734459	1.12215	0.591296	0.675948
	1.12032	0.690958	1.16818	1.19501	0.837711	1.31906										1.08773	0.731227	0.930178	0.801939	0.967664	0.945313
	1.49038	1.15297	1.1271	0.973758	1.05128	1.09442										0.858993	1.01262	1.08383	0.997611	0.757101	0.614868
	1.31734	0.802518	0.558818	1.15057	0.658965	0.773244										0.982461	0.83465	0.878435	0.530171	0.546773	0.880368
	1.06078	0.852805	0.786554	0.735177	1.2227	1.24553										0.6099	1.07855	0.822902	1.10062	0.881733	0.779522
	0.820936	0.861801	1.14783	0.929006	1.22371	1.13315										1.22539	0.50381	0.985905	0.645161	0.992109	0.584517
	0.847415	0.663325	0.770892	1.09154	0.861571	0.975458										0.753978	1.19942	1.19343	0.732281	0.92643	0.89927
	1.29575	0.687846	0.962605	0.574211	0.911963	1.32799										1.92891	1.21723	0.919505	0.731798	0.924295	0.72033
	0.694133	0.381711	1.1003	1.08481	1.3384	0.95402										1.1076	0.979583	0.825783	0.532449	0.80841	1.01641
	1.06849	0.718008	0.748522	1.03117	0.61399	1.00992										0.975515	0.532519	0.950801	1.39319	1.05706	0.572715
	0.513372	0.73891	1.21558	1.01591	0.879255	0.723285										1.0038	0.968353	0.653091	1.07901	0.925346	0.626636
	0.665152	0.803511	0.966667	0.922711	1.13892	0.927308										0.881697	0.696717	0.566229	0.823673	0.803351	0.652427
	1.22898	1.12739	0.378039	1.14547	0.886751	1.29071										0.998513	1.08631	0.715242	0.830346	0.919066	1.04995
	0.901681	0.94361	1.51328	1.07951	1.11764	1.12765										0.876112	0.974043	0.853435	0.85679	0.922512	0.772005
	0.666147	0.66401	0.95426	1.28212	0.931559	1.28931										1.45422	0.922684	0.763351	0.578643	0.736477	0.895071
	1.13124	0.73611	0.794353	1.52251	1.26204	0.853675										0.724733	0.84421	0.904567	1.11798	0.900924	0.600448
	1.50273	0.67325	0.945846	1.11676	1.04654	2.01358										0.645889	0.816453	1.39644	0.806991	0.974662	0.825378
	0.922066	0.422997	0.981685	0.809776	1.0439	0.614898										0.808283	0.757558	0.771279	0.732854	0.772111	0.626532
	0.840106	0.967448	0.813605	1.21191	0.831647	0.902506										0.763534	1.00061	1.08602	0.84167	0.8632	0.250883
	1.09554	0.571481	0.701883	1.34668	1.5999	1.06849										0.854977	1.10085	0.806897	0.741134	0.911793	0.423594
	1.00637	0.924414	0.987293	0.466721	1.29847	0.959197										0.656157	0.837174	1.00268	0.672607	1.29495	1.0704
	1.07936	1.05835	1.09598	0.464974	0.601203	0.633728										1.59407	0.880477	0.827825	0.711006	0.702968	1.20914
	0.892873	0.99709	1.03003	0.871953	1.49969	0.72141										1.34252	0.985444	0.506942	0.587765	1.49691	0.839511
	0.76044	0.767962	1.00287	1.03071	0.717048	0.729082										0.657583	0.823794	0.884073	1.0668	0.990886	0.492179
	1.1926	1.19342	0.986836	0.97481	0.698442	0.649185										1.13686	0.844668	0.490298	0.758643	1.72206	0.764368
	0.989684	0.791075	0.786268	0.5762	1.16872	1.01124										0.646927	0.734757	0.532224	0.730614	0.879762	0.648511
	1.25257	1.11012	1.20013	0.553339	0.525671	1.19488										1.00841	0.459388	0.85635	0.842923	0.682573	0.636708
	0.662445	0.730096	0.839987	0.524433	0.97237	1.15849										1.04808	0.830281	0.810488	0.78216	0.883548	0.809308
	1.00217	0.8408	1.19282	0.715248	1.33011	1.11418										1.01855	0.612209	0.866693	0.744052	0.922583	1.2122
	0.958304	0.880061	0.907934	0.767052	1.26786	0.811333										0.690242	0.786952	0.816922	0.607212	0.892461	0.954577
	1.16866	0.980274	1.06794	1.0289	0.81201	1.03047										0.94533	0.632429	0.837726	0.803011	0.905145	0.798237
	0.844313	0.837607	0.869257	0.86758	1.42085	1.3223										0.723186	0.9222	0.797888	0.899337	0.907121	0.799785
	0.872613	1.1945	1.09077	1.42293	1.29519	0.830256										0.589717	1.36452	1.23152	0.686579	0.798376	0.52976
	0.934942	0.993376	0.858578	0.932229	0.72043	0.995995										0.864341	0.878019	0.72351	0.820917	0.62317	0.390928
	0.723746	0.972588	0.794383	0.810422	1.3365	0.942036										2.04786	0.949343	0.812517	0.553872	0.521814	1.02969
	1.74304	1.10853	1.00427	0.724285	1.42103	0.757811										1.07333	1.6787	0.577869	0.718186	0.629004	0.549231
	0.917436	0.524307	0.921337	0.73421	1.07811	1.09809										1.08381	0.992913	1.11607	1.08081	0.762026	0.651708
	1.31478	0.719572	0.902255	0.826154	1.11023	0.672537										1.01029	0.779955	1.3754	0.900867	0.786573	0.787384
	0.745142	1.5461	0.676782	0.973251	0.953403	0.851394										1.08631	0.619941	0.844252	0.577271	0.84859	0.626881
	0.890644	0.527904	0.727939	0.837503	1.08991	1.06988										0.721582	0.859031	0.857521	0.704087	1.29715	0.421026
	1.02259	0.772905	0.931633	0.849732	1.16374	0.735428										1.45803	0.922997	0.978247	0.861825	0.951544	0.920995
	1.08876	0.90116	0.874374	0.71337	1.51756	1.23413										1.07719	0.712169	0.658448	0.859657	1.02095	0.842455
	1.90023	1.06156	0.963768	0.408672	0.637304	0.586761										0.772783	0.902616	1.21208	0.721344	0.614074	1.49836
	0.821176	1.30275	0.925665	1.1484	1.62122	1.09815										1.78013	0.832624	0.465492	0.621363	0.929164	0.760934
	0.873086	0.832459	0.621589	1.16779	1.20759	1.62387										1.21308	0.559206	0.783829	0.699574	1.09646	0.819594
	1.67499	0.61068	1.13829	0.806491	0.775172	0.854564										1.68129	1.27864	0.666871	0.581999	0.869684	0.816178
	1.24828	0.554228	1.07516	0.854313	1.00875	1.06198										0.634882	1.09392	0.529898	0.576821	0.631983	0.625449
	0.613599	0.965184	0.765095	1.29524	1.1356	0.812244										0.597207	0.890883	0.483519	0.557472	0.869747	0.95138
	1.12727	1.14069	0.900056	1.37025	0.784559	1.26307										0.882012	1.60302	0.604451	0.79735	0.689878	0.73268
	1.66679	0.731475	1.16529	1.34628	1.05382	0.95102										1.31142	0.730583	1.24338	0.891473	1.05072	0.708999
	0.584182	0.833024	0.622695	0.943313	0.986843	0.932277										0.90433	0.900337	0.943379	0.523806	0.898163	1.0584
	0.576476	1.21297	1.06849	0.98421	1.33448	1.25227										0.688693	0.655303	0.730666	0.869575	1.19751	0.986425
	0.808952	1.13766	0.765585	0.586855	0.727227	1.18288										1.02871	0.659355	0.848213	0.623606	1.06119	0.875658
	0.636547	1.0353	0.702922	1.06258	1.0435	0.956633										0.699497	0.871726	1.01541	0.917338	0.57296	0.833189
	0.831701	1.5565	0.865223	0.80007	1.18407	0.821267										1.02352	0.618738	0.627775	0.743486	0.795384	0.537185
	0.663814	0.584627	0.997288	0.77618	1.23043	0.573145										0.687164	0.439952	1.19547	0.664604	0.763382	0.746831
	0.440886	0.792848	0.904686	0.881666	1.23948	1.28803										1.1016	1.07993	0.791682	0.769305	0.630038	0.698455
	1.06663	0.890339	1.02343	1.09673	0.558405	1.32472										1.25703	0.832604	1.05243	0.726273	1.06428	0.618711
	1.27566	0.802892	1.14729	1.01348	0.879458	0.720153										0.628239	0.530666	1.16631	0.820837	0.522104	0.75737
	0.726842	1.03945	0.756647	1.23943	1.002	0.944109										0.684156	0.838118	0.915906	0.726395	0.957974	0.941348
	0.834704	0.840255	1.26498	0.993707	0.920979	0.756736										1.41694	0.717118	1.11123	1.28401	0.865087	0.685564
	0.924067	0.979412	0.645068	1.01978	1.27675	0.799527										1.00312	0.864701	1.23152	0.911599	1.04931	0.869475
	0.903877	0.525897	1.02239	0.769221	1.16799	0.48716										1.04168	0.710026	0.941683	1.19372	1.13001	0.665406
	0.802927	0.954219	1.01421	1.53934	0.949433	0.738178										0.894833	0.935626	0.672667	0.813891	1.28836	0.698991
	1.06538	0.746575	0.649579	1.00216	1.05142	0.887159										1.2574	2.02532	0.780566	0.487822	0.849227	0.833465
	0.86238	0.897259	0.817154	0.209944	1.07155	0.862041										0.66691	1.20743	0.835194	1.46814	1.02082	1.16866
	0.937646	0.31056	1.12355	1.16211	0.695307	1.07683										1.04396	0.661604	0.97856	1.03545	1.04675	0.67827
	0.848491	1.3306	0.840656	1.73302	0.864041	1.05073										1.16994	1.1602	0.944343	0.833995	0.519007	0.807818
	1.25278	0.977651	1.06987	1.23354	1.35139	0.672905										0.784665	0.968762	0.924746	1.10884	1.09573	1.04376
	0.688488	0.919876	0.798049	0.828124	0.783469	0.813913										1.53993	1.20266	1.28537	1.1686	1.11359	1.08451
	1.56525	0.717479	0.895352	0.799491	0.745982	0.801339										0.977229	1.51511	1.29748	0.787343	0.786686	0.947487
	1.30881	0.818612	0.783301	0.818672	1.10216	1.65505										0.671255	0.36633	0.771062	0.698105	0.693807	0.909921
	0.987843	1.20463	0.93377	0.921748	1.00576	1.17373										1.37913	0.489267	0.814884	0.475684	0.774057	0.876976
	0.936605	0.837771	0.839427	0.652211	1.03997	1.65534										0.735144	1.13361	1.33453	1.30333	0.832952	0.828142
	1.0305	0.790716	0.989727	0.695006	0.856654	0.956915										1.20235	1.64028	0.720842	0.874918	0.895468	1.96663
	0.778017	0.969573	0.886988	0.88313	0.952817	1.08401										0.676975	0.949853	1.02967	1.24	1.13415	0.888922
	1.06606	0.917448	0.848232	1.02483	1.19688	1.35898										1.56389	0.956526	0.792935	0.799405	0.785442	0.552922
	0.876581	1.12505	1.28927	0.617843	0.720918	1.27583										0.710003	0.887597	0.770074	0.8921	1.18771	0.967136
	1.32637	0.997141	0.896036	0.986399	0.969607	0.74548										0.807986	0.963304	1.03736	0.607053	1.04679	0.91874
	0.832174	0.725448	1.34671	0.861638	0.875819	0.977687										0.63341	0.74833	0.919681	0.74909	1.26015	1.05763
	1.26333	0.668305	0.758266	1.1305	0.928964	1.07882										0.942011	1.56026	0.696124	1.22589	0.70819	1.03534
	1.15699	1.18699	1.00232	0.598322	1.10333	0.557975										1.18654	0.68135	1.30608	1.25772	0.745349	0.968259
	1.10262	1.10538	1.02037	0.708589	0.863209	1.38621										1.77067	1.79357	1.17566	1.12951	1.49188	0.768018
	2.41465	0.928045	1.00734	0.777291	0.577354	1.42779										1.17742	1.04715	0.87179	0.856044	1.2572	1.01583
	1.15067	1.11026	0.799012	0.492795	0.679762	0.928314										1.2027	1.09312	0.876507	1.00565	0.762634	1.02241
	0.898233	0.6553	1.32557	0.966927	0.626897	0.880824										0.623911	0.659562	0.444635	0.693568	1.09512	1.58584
	0.527571	0.612621	1.23125	0.809493	0.772116	1.13144										0.623936	0.576921	0.613317	1.00631	0.968627	0.752784
	0.732561	0.677018	0.755477	1.06885	1.14905	0.662165										1.66952	0.793308	1.03801	0.762345	1.61017	0.962005
	1.26516	0.99537	0.611403	1.43927	1.01478	1.49519										0.4557	1.06156	1.14779	0.718444	0.761206	0.911306
	0.871572	0.599636	0.973474	1.15963	1.04406	1.14782										0.582793	0.87893	1.10939	0.721711	0.795752	0.823151
	1.08234	0.474745	1.18148	1.05468	0.894335	1.02649										1.17783	0.868488	1.00872	0.513569	1.10128	0.816537
	0.725783	1.46215	0.768368	0.957978	1.35097	1.13112										0.758002	0.582984	0.746738	0.758047	0.857865	0.835044
	0.718323	0.678236	1.52327	1.16169	1.62085	0.976416										1.21578	2.00831	0.943658	0.793286	0.934619	0.813941
	1.1793	0.697969	0.65535	0.688599	1.35121	0.883005										1.22086	1.24239	1.04887	0.637096	0.626754	0.88535
	0.83626	0.763829	0.841827	0.996958	0.79196	1.34822										1.88253	0.379691	0.843235	0.871522	0.957264	0.930974
	0.594666	0.93506	0.955758	0.98388	2.17247	1.0828										0.694117	1.55615	0.783395	0.928568	0.671328	0.641448
	1.25755	0.751287	0.770038	0.537551	1.44942	0.737674										1.02027	0.557801	1.02179	0.713889	0.805318	1.34046
	1.51654	1.19585	2.26579	1.1393	0.632461	1.03969										0.681266	0.731872	0.440636	0.736244	1.0111	1.05323
	0.790787	0.893273	0.762149	1.25679	0.868217	0.886477										1.37205	1.01504	0.80985	0.897245	1.19269	0.819677
	0.790709	0.821721	0.494464	1.69468	1.42996	1.08328										0.928406	0.995999	0.50144	0.907833	1.07506	1.44072
	0.570751	0.612219	0.704178	1.92674	1.16535	1.00764										0.687319	0.860191	0.733174	0.88523	0.983879	0.820985
	1.2903	0.897127	1.14254	0.970053	0.96023	1.24052										0.963937	0.677893	0.883926	0.914229	0.99142	0.986959
	0.775014	0.906706	1.09616	0.595845	1.66769	0.908752										1.03341	0.707371	1.42033	0.74431	1.25342	0.562131
	0.82199	0.436054	0.854512	0.815402	0.398486	0.596083										0.970609	1.67183	0.861033	0.46767	0.615697	1.03395
	0.806726	0.716164	1.03827	1.0519	0.936181	1.24486										0.588355	1.08635	1.03339	0.580779	1.13562	1.30153
	1.05405	1.08467	0.792938	1.94883	0.939788	0.533736										0.820211	1.55662	0.766813	1.00457	0.792435	0.88744
	0.742942	0.981941	1.69928	0.790832	1.28252	0.968176										1.28804	0.674075	0.992642	0.712789	0.931758	0.864506
	1.0738	0.78684	0.68248	0.795782	0.921008	1.1102										0.860192	1.13815	1.2916	1.76108	0.352748	1.02049
	0.920226	1.21742	1.01432	0.872498	1.24417	1.33784										0.722388	0.761119	1.35673	0.973268	1.14764	0.568082
	0.492532	0.942983	1.22534	1.45319	1.46104	0.958643										1.17947	1.16803	0.846609	0.605255	1.11016	0.559636
	0.816245	0.746652	1.64046	0.793989	1.4902	1.40524										1.33527	0.902768	1.02825	1.16621	0.97119	0.772575
	0.712062	0.860609	1.26179	0.573538	1.04702	1.65737										0.794385	0.628661	1.17405	0.789464	0.724623	0.921395
	0.820726	0.673609	1.40326	1.08571	1.58561	0.88749										1.23948	0.615941	0.7333	0.945594	0.935128	0.759273
	0.639653	1.16562	0.882765	1.29213	0.914727	0.800181										0.964295	1.11404	0.654225	0.733748	1.11087	0.962839
	0.90459	0.813361	0.675224	0.977132	1.24099	1.13681										1.39683	1.04593	0.785443	0.494793	0.859137	0.795864
	0.835663	0.606693	0.843206	1.13388	1.68063	1.31518										0.82183	0.774558	0.635276	0.908528	0.857501	0.809355
	0.969476	1.45041	1.11698	0.838727	0.907639	1.15364										0.747374	1.02071	0.859404	0.900633	0.698278	1.11567
	0.898247	0.880781	0.725649	0.841198	0.68332	0.811995										0.977147	0.926594	1.20566	0.937959	1.57637	0.976695
	1.26546	0.833112	0.606419	0.775258	0.768371	0.878483										1.36784	0.878658	0.853166	0.502468	0.984148	0.726893
	1.34909	0.360054	0.796845	0.935795	0.984134	1.04071										1.09691	0.621298	0.76798	1.14125	0.640731	0.90926
	1.02989	0.776862	1.05568	0.862988	0.652643	0.693396										1.49372	0.992013	1.01804	0.550409	1.15577	0.592511
	0.757487	1.12905	1.11961	0.614414	1.2024	1.47724										1.67901	0.809638	0.99497	0.87284	0.856868	1.41776
	0.709353	1.30234	1.15009	1.05891	1.07305	0.731452										0.902212	0.598496	0.950344	0.698372	0.705374	0.733738
	0.787949	0.915389	1.28599	0.758804	0.772022	1.17612										0.716286	1.11774	0.800941	0.886205	0.902967	0.494814
	1.05874	0.715434	1.42271	1.04491	1.07231	0.579744										1.09327	0.70447	1.41939	0.701421	0.900731	1.30612
	1.34756	0.727694	0.875491	1.64285	0.944798	1.33581										0.95826	1.56514	0.979716	0.614107	1.38632	1.09991
	1.06354	0.892011	1.15042	1.23654	1.0346	1.52451										1.20232	1.17873	0.686486	0.674041	1.05974	0.914
	1.32541	0.327191	0.980302	1.051	1.25937	1.07958										0.996511	0.614249	1.34591	0.99309	0.603346	0.79447
	1.26405	1.03071	0.745301	0.565886	1.81821	0.717552										1.01866	0.776373	0.938615	1.11989	0.558638	0.977101
	1.60639	0.864277	1.21966	0.399459	1.52047	1.14918										0.766278	0.422227	0.930779	1.00243	0.870827	0.557468
	0.676893	0.887224	1.0055	0.61781	0.950224	1.2905										0.522065	0.775047	0.93873	0.53967	0.612368	0.899335
	0.766785	1.20831	1.28379	0.618885	0.686645	0.815446										0.950655	0.887822	1.22539	0.631087	0.779417	0.947706
	1.25567	0.757002	1.02229	1.04724	1.16272	1.11948										0.650058	0.608565	1.00413	0.645762	0.951931	1.01718
	0.586227	0.780303	1.41644	1.64079	1.26435	0.774436										1.09229	0.476094	1.0577	1.12682	0.842752	0.925082
	0.58488	1.00522	0.795027	1.40682	1.17872	0.579124										1.06101	0.76651	0.713127	0.751021	0.90588	0.933662
	1.29139	1.3618	0.776221	0.880136	0.828398	1.28288										0.765937	0.912752	0.976055	1.16806	1.43789	1.38024
	0.988181	1.02814	1.0884	1.20476	1.23819	1.17249										1.16142	0.944831	0.886154	0.881055	0.666588	0.753072
	0.396409	0.872089	1.27896	0.912683	0.978913	0.534426										2.02742	0.740493	1.01685	1.5163	0.928024	0.550646
	1.47877	1.45898	0.567106	0.707387	1.04125	1.10139										1.4536	0.865162	1.01999	0.984747	1.01857	1.04326
	1.4577	0.49105	0.992178	0.939112	0.830036	0.911868										0.932232	0.568311	0.818664	1.55496	1.00799	0.89909
	0.549224	0.608861	0.722819	1.02627	0.829556	0.90931										0.773082	0.838533	0.661398	0.727282	1.13723	0.731981
	1.38917	0.96906	0.730685	0.574515	1.06959	1.15599										0.672329	0.576139	0.75602	0.8297	0.575566	1.09854
	1.07757	0.914598	0.795788	1.33213	0.865483	0.785535										1.26979	0.593999	1.05232	0.891894	1.31452	0.530352
	1.28196	0.975489	0.922983	0.396557	0.822339	1.10102										0.686357	1.05532	0.807406	1.21581	1.32195	0.596248
	0.98006	0.639423	1.09972	1.1037	0.834345	0.983547										1.26608	0.98565	1.05773	0.955905	0.933224	0.796154
	0.801567	0.755348	1.02859	0.857369	1.18307	1.09115										0.856749	0.789118	0.566677	0.809388	0.700199	0.824771
	0.92566	0.726154	0.744853	0.835286	0.928319	1.29015										1.05303	0.813447	0.896713	0.590979	0.550928	0.800186
	1.24867	0.940947	1.06434	1.03841	0.6199	0.81773										0.960417	0.932545	0.892915	0.746694	0.640914	0.681251
	0.926613	0.778566	1.02316	0.56648	0.60333	1.03333										0.555003	0.858154	1.71109	1.28094	1.01332	0.98062
	0.869461	0.956737	1.22296	0.873645	1.13632	0.870005										0.788172	0.64873	0.772191	1.18549	0.59171	1.33163
	0.705541	0.765942	0.791936	1.18758	1.00689	1.10127										0.957332	1.1459	0.89282	1.13626	0.965833	0.762645
	1.72593	0.829572	0.924448	1.05313	0.943477	0.668835										0.608977	0.579569	0.858774	0.86535	0.956677	0.617032
	0.943709	0.626335	0.860106	0.863791	1.03348	0.972632										0.622149	0.537283	0.624622	1.18332	0.831109	1.03368
	0.841821	0.722122	0.707106	0.644137	0.791467	1.24802										0.674078	1.11163	0.658367	0.714328	0.794403	0.8046
	0.899152	0.976605	0.992729	0.772062	0.876743	0.822399										0.95588	1.10255	0.971202	0.611377	0.575785	0.919497
	0.812697	0.705656	0.899932	0.755	0.982742	1.26995										1.24853	0.701405	0.861607	1.07614	0.571087	0.849696
	1.50126	1.14559	1.07137	0.996515	1.06332	0.631682										1.06657	0.570721	0.829823	0.936707	0.55958	0.592198
	1.28894	0.881732	0.584219	1.05713	1.26986	0.974001										0.883734	1.50113	0.633429	0.67354	0.765168	0.784121
	1.82633	0.510051	0.927547	0.779805	1.05198	1.03143										0.901491	0.511153	0.882969	0.999467	0.858786	0.688258
	1.03367	1.22551	0.76439	0.899723	1.54937	1.35938										0.797457	1.40936	0.408606	0.948938	1.22689	0.816524
	1.06284	1.06095	1.04258	0.881991	0.515553	0.910006										0.782302	0.689162	1.05391	0.505831	1.25578	0.834427
	0.976846	0.840824	0.990421	1.10687	1.28068	1.11405										0.837604	0.840337	0.887749	0.585456	1.08798	0.701134
	0.888051	0.783795	0.855237	1.04389	1.54508	1.1256										1.15237	1.19436	0.833527	0.810201	1.31836	0.586499
	0.860375	1.21722	0.678797	0.976897	0.791498	0.941448										0.800737	1.43095	0.606454	0.827629	1.34304	0.604609
	0.634538	0.677582	0.973216	0.780511	0.762878	1.1177										1.00047	0.681215	0.879364	0.628331	1.12583	0.83333
	1.19272	1.1195	0.896769	1.28149	0.794665	1.10065										1.16693	0.916865	0.843806	0.86014	0.733971	0.8452
	0.943102	0.969982	1.16197	0.718641	1.22072	1.22521										0.627107	0.777917	0.796702	0.702299	0.737016	0.834235
	0.593872	0.417346	1.26674	1.96206	1.23979	0.871166										0.954877	0.716381	0.664575	0.593189	0.593714	0.757374
	0.903232	1.5828	1.10435	0.652399	1.15427	1.03605										1.32348	0.818931	0.826874	0.988603	1.49353	0.447006
	0.930619	0.825231	0.984352	1.31192	1.42734	1.05915										0.796479	0.892402	0.773937	0.90317	0.720777	0.650578
	1.35217	1.07189	1.01618	0.68135	1.34125	0.921855										1.27182	0.8711	0.842266	0.937281	1.07613	0.811892
	1.36717	0.752781	1.25728	0.860665	0.936029	0.986684										1.29346	0.636399	0.895075	0.937491	0.722747	1.27081
	0.834608	1.10881	1.19752	1.13708	0.808133	0.76093										1.02388	1.28228	0.993711	0.647248	0.886429	0.820483
	1.11235	1.15094	0.78069	0.979914	1.34673	0.997701										0.880069	0.604402	1.07291	0.740679	0.722842	0.909555
	0.845741	1.01069	0.82076	1.26788	1.04646	1.29092										0.929953	0.918852	0.930843	0.868177	0.784707	0.551424
	0.808943	1.12411	1.14521	0.892172	1.02653	0.887046										0.548058	1.06315	0.881816	1.26492	0.989582	0.615347
	1.2136	1.00274	1.06507	1.23555	1.13217	1.40099										0.578821	0.808472	0.675828	0.497	0.836997	0.973219
	1.24758	0.763061	1.29511	0.927165	0.691753	1.34923										1.73057	1.23493	0.930577	0.520455	0.66468	0.898368
	0.670614	0.400158	1.24775	1.28668	1.01758	1.39068										1.05388	0.754832	0.883363	1.12621	0.719182	0.744019
	0.984173	1.42301	1.01708	1.03221	0.929519	1.11637										1.13646	0.757841	0.900369	0.890687	0.483662	0.815928
	0.78108	1.08359	0.703282	0.58493	0.606624	0.540134										0.635536	1.13677	0.856746	0.456292	0.75036	0.908324
	0.979258	0.752046	0.829419	0.682094	0.883716	0.666689										1.26241	0.728594	0.797162	0.667251	0.837763	1.23758
	0.926096	0.941082	0.810019	0.794656	1.25207	0.82102										0.956535	0.764229	0.631782	0.898445	0.897131	0.532456
	0.926615	0.632452	0.860195	1.63149	1.33846	1.08194										0.474255	0.721314	0.835406	0.801448	0.648514	0.533378
	0.651485	1.25827	0.876595	1.10689	1.20366	0.9358										0.944927	0.709991	0.798993	0.595275	0.891808	0.838995
	0.561139	1.0013	0.748402	0.759672	0.785126	0.895338										0.843184	0.942962	1.10202	0.804924	1.01107	1.03935
	0.772111	1.07412	1.13948	0.920521	1.09304	0.573075										1.45393	0.0947585	0.475268	0.902528	1.07013	0.71797
	1.25828	1.0439	1.37944	0.813414	0.845859	1.48061										0.830656	1.4875	0.726709	0.652863	0.666562	0.849043
	1.40331	0.894236	0.66204	0.782801	1.11679	0.971638										1.69399	0.610514	0.783179	0.778323	0.874947	0.932796
	1.04549	0.816729	1.04789	1.69789	1.5351	0.966468										1.21719	0.725	0.677582	1.01458	0.541956	0.328305
	1.51494	0.872171	0.810022	1.00482	1.29215	0.987783										0.524873	0.605467	0.748741	0.675562	0.787894	0.394876
	0.827338	1.11048	0.585703	0.88664	0.638793	1.11113										1.02355	0.849738	1.28087	0.96565	0.836146	1.16947
	1.12353	0.857214	0.867752	1.02619	1.04898	1.17577										0.902412	1.04957	0.938446	0.852439	0.453544	0.935995
	0.963274	0.844307	1.19207	0.580282	0.606336	0.977534										1.35829	0.736622	0.695496	0.619992	0.676873	1.16014
	0.745925	1.07875	1.08922	1.15403	0.758166	0.733086										1.41391	1.035	1.46784	0.712025	0.762623	0.685356
	1.04777	0.605308	0.935522	1.56829	1.18778	0.985552										0.865482	1.57369	1.0975	0.742063	0.892787	0.661024
	0.950914	1.37851	0.791673	1.03805	0.92163	0.824425										0.847598	1.35912	0.867536	1.30214	0.612879	0.59627
	0.762431	0.902241	1.13005	0.993512	1.14601	0.924781										1.55364	0.754588	1.1471	0.710106	1.07353	0.687452
	0.967841	0.593168	1.34769	0.543882	0.973386	0.856171										1.17015	0.484591	0.856343	0.611824	0.885857	0.437245
	0.713481	1.88136	0.931422	1.04951	0.920417	0.66134										0.891027	0.684764	1.09964	0.722076	0.903392	0.628832
	0.757115	0.510908	1.33664	1.16293	0.862646	0.799896										1.03432	0.689261	0.991609	0.868146	1.07516	1.19773
	1.00531	0.782366	1.14272	0.794077	1.11606	0.689469										0.84424	1.3116	0.661351	0.494392	1.44942	0.842754
	0.935705	0.675854	1.04262	0.46779	0.632405	1.08197										0.939522	1.01493	1.30224	0.845667	0.647224	0.897089
	0.826758	0.82604	1.35348	0.611704	1.10191	1.08237										0.804609	0.804016	0.699286	0.764103	0.922646	0.720732
	0.823216	0.915601	0.893701	0.740521	0.991564	0.900281										0.900298	0.48559	0.997129	0.518933	1.03785	0.856305
	0.934228	0.93215	1.00727	1.14632	1.11872	0.677479										0.958045	0.737995	0.977927	1.03065	0.827805	0.495028
	0.525607	1.22515	1.11462	0.952	1.04011	1.58441										1.34312	0.751276	0.686646	0.820288	0.941118	0.618937
	0.922244	0.986262	0.983697	1.17172	0.759752	1.22602										0.649072	1.08165	0.802733	0.697601	0.761237	0.88268
	0.883901	0.748641	0.628715	0.980224	0.827276	0.879668										1.03972	1.09195	0.847509	0.95491	1.40167	1.88428
	1.7762	0.830068	0.518512	0.906242	0.812472	0.661007										0.752424	0.8805	1.12336	1.01916	1.06151	0.800552
	0.982283	0.630365	0.834451	0.939929	1.34012	1.13304										1.35782	0.742675	1.01002	1.09402	1.15264	1.37583
	1.09156	0.857165	1.00256	1.14145	0.867123	0.774812										0.752863	0.524513	0.69316	0.970257	0.384288	0.765728
	0.45029	1.17214	0.685368	1.41074	0.885004	1.2507										0.967047	0.973426	0.460048	0.836794	0.58506	0.53454
	0.904611	0.801835	0.692258	0.763673	0.821284	1.11232										0.81452	0.760584	0.712273	0.889531	0.850007	0.917623
	0.831302	0.653898	1.21743	1.16952	0.710933	0.955077										0.755218	1.36572	0.872221	0.90534	0.688045	1.08834
	1.39073	0.77507	0.940294	0.891607	1.36314	0.908627										1.04742	0.882158	0.561592	1.0299	0.868327	0.991936
	0.979292	1.06276	0.88443	0.585074	1.12926	0.933048										1.25272	0.562044	1.07423	0.777268	0.962082	0.718311
	0.946966	1.09937	1.15629	1.18625	0.711928	1.42717										0.939614	0.701328	0.569282	1.2789	1.21483	0.641756
	0.823564	1.07354	1.04917	1.14981	1.33075	0.84849										0.90804	0.914638	0.69135	0.747323	0.41	0.597832
	0.893216	0.841485	0.597436	0.818854	1.18218	1.94319										1.13413	0.912546	1.07676	0.952048	0.83043	0.231144
	1.39014	0.974794	0.975952	0.908131	0.915771	0.773383										0.225013	1.2005	1.32833	0.612962	1.44284	0.593117
	1.29811	1.11879	1.16052	0.668734	1.03108	1.42164										1.29224	0.779772	1.0637	0.899125	0.463418	0.974286
	0.93266	0.791504	0.598617	0.867978	1.00849	1.49465										0.546381	0.953837	1.30867	1.1527	0.507805	0.579169
	0.776534	2.02543	0.876409	0.757506	1.46406	0.862202										1.40258	0.564195	0.636434	0.978169	0.866149	1.06159
	0.950816	0.861743	0.407343	1.0207	0.83996	0.794691										0.825376	1.22833	0.771591	0.508001	0.478205	0.800912
	0.783401	1.03962	0.878456	0.942114	1.50701	0.53325										0.968848	0.908653	0.768366	1.39552	0.926804	2.16142
	0.849695	1.23741	1.00191	0.751293	1.4618	0.92094										1.10329	0.577961	0.758928	0.563511	0.743771	0.834839
	0.605272	0.517431	1.06028	1.21238	0.625894	1.2131										1.64936	0.836146	0.951114	0.932891	1.22331	0.650994
	0.935339	0.887184	0.732361	0.653767	0.846648	0.849878										0.792196	1.17385	0.631131	1.09945	0.813672	0.74979
	1.18348	1.32582	1.00589	1.0966	1.12171	0.898476										1.217	0.992371	0.721992	0.745681	1.36469	0.838843
	0.778939	0.72958	1.71934	1.4132	0.995281	1.16678										0.710841	0.735721	0.697109	0.758936	0.733887	0.470142
	1.12993	0.944657	1.08735	0.227916	0.65571	0.767089										1.50835	1.06939	0.975838	0.664473	1.09661	0.616299
	0.72829	1.13363	1.28099	1.64039	1.15283	1.17301										0.948686	1.17163	0.550016	0.679655	0.987732	0.894257
	0.775363	1.12602	0.976899	0.908605	0.689918	0.90576										1.10699	0.829333	1.23844	1.00076	1.12493	0.918984
	0.810448	0.97005	1.40426	1.21958	0.822455	1.18012										0.805917	0.48514	0.905071	0.872849	1.04556	1.31963
	0.867622	0.693788	0.914184	0.926907	1.21848	1.05584										1.47565	0.671772	1.02488	0.870559	1.19322	0.898933
	0.797435	0.894306	1.16855	0.865931	1.04215	0.464376										1.4058	1.59287	0.539752	0.44831	0.790949	1.03361
	1.09884	0.645488	0.872151	1.00728	0.975223	0.75524										1.87506	0.717044	0.693907	0.674616	1.26091	0.690776
	0.999905	1.29485	0.78478	1.15779	1.20713	1.07157										0.624411	0.811413	1.48077	0.634691	0.556145	0.659494
	1.18337	1.21807	1.00135	1.19591	0.681207	0.925014										0.821128	1.89682	0.806326	1.18298	0.957024	0.837703
	1.32441	0.891884	0.998172	0.828099	1.4637	1.1553										0.822759	0.759046	1.51033	0.721924	0.726723	0.710102
	1.069	0.940858	1.03593	0.850123	0.970808	0.656225										0.723101	0.912698	0.904975	0.832356	0.647619	0.675664
	0.97376	1.01109	0.916905	1.05899	0.789726	1.41058										1.08618	0.626658	0.786225	0.599425	0.848022	0.736806
	1.13231	1.54975	0.24726	0.409162	0.89617	0.739191										0.906154	0.597688	1.1499	0.638616	1.31822	0.657648
	0.955729	0.777292	0.815526	1.37489	2.46411	1.41726										0.78989	0.890376	0.751069	0.681337	0.696231	0.927389
	1.51588	1.09335	0.839496	1.69458	0.792625	0.999749										1.21164	0.934338	0.983646	0.758969	1.51669	0.945141
	1.30185	1.06504	0.799389	0.987254	1.07409	1.06509										0.665388	0.739377	0.800478	0.673325	0.960321	0.771017
	1.05404	1.06952	0.868437	0.512482	0.972201	1.86912										1.03395	0.654357	0.47963	0.990978	0.488582	1.00706
	0.943382	0.68521	1.14105	0.605651	0.837576	1.07184										0.979968	0.455074	0.853275	0.509351	0.861108	0.563272
	1.57621	0.705769	0.80501	1.15003	1.38159	1.11631										1.02961	0.879185	1.45422	0.631949	1.04159	1.05143
	0.799619	0.784661	0.548267	0.763451	0.932235	1.13263										0.624562	0.651284	0.834192	0.940965	0.596851	0.573897
	1.18956	0.617047	0.73845	0.760053	0.930779	0.937964										0.732222	0.543631	1.86101	0.705785	1.50587	0.785116
	1.03423	1.21831	0.726871	1.37176	1.10687	1.39868										0.867308	0.704639	0.951314	1.16243	0.478032	0.990398
	1.08491	0.746599	1.00451	0.835041	1.22947	1.02786										1.09107	0.577906	0.859322	0.602384	0.711524	0.98537
	1.31067	0.901135	0.844883	1.1447	1.16882	1.06469										0.414773	0.702134	0.845734	0.80852	0.765031	0.919008
	1.28596	0.891468	0.962183	0.893676	1.39452	1.15402										0.837066	0.757364	1.09225	0.913232	0.725161	0.706644
	0.826552	1.03641	1.27052	0.996144	0.896913	0.82246										1.41631	0.745138	1.04666	1.03005	0.5701	0.980447
	0.696757	0.881969	0.843442	0.935909	1.01052	0.877945										0.900152	0.897977	0.927892	1.24118	0.503814	0.682556
	1.27149	1.17182	1.08198	1.13075	0.973352	2.06685										0.978277	0.405809	0.780574	1.04389	0.73657	0.869719
	0.890305	0.94121	0.819629	0.902946	0.768771	0.910047										0.9612	1.13849	0.985336	1.31838	1.04882	0.830344
	1.16564	1.06777	0.824938	0.861125	1.18832	0.856967										0.976867	0.921682	0.649451	0.794886	2.20847	0.888367
	1.60173	0.689041	0.778205	0.761921	1.17769	0.415663										1.1084	0.932587	0.740129	0.748546	0.580406	1.29201
	0.903769	0.592563	1.01724	0.50425	0.968856	0.911848										0.59658	1.12711	1.47842	0.742862	0.768344
	0.942465	0.70871	0.835584	0.807707	0.94243	0.875152										0.860533	1.9376	0.87546	0.905509	1.02813
	0.330272	1.00585	1.17225	1.63273	1.12269	0.855051										0.57214	0.820827	0.676524	0.818724	0.625696
	0.976386	0.971397	0.902886	0.675028	1.2829	1.03974										1.30444	1.14463	0.539403	0.950054	1.19925
	0.675775	0.685367	0.973698	1.09705	0.773441	0.843253										0.627034	0.705621	0.684301	0.538436	0.867264
	0.360333	0.984692	1.24475	1.0149	0.825976	0.822086										0.720108	0.945736	0.96154	0.671639	0.69383
	1.23506	1.31524	0.968778	0.562436	0.981812	1.0176										1.11415	0.624086	0.584828	0.880028	0.779566
	1.43903	1.16827	1.01611	0.651657	1.21048	0.640105										1.04343	0.966798	1.21302	1.20726	1.05224
	1.0575	1.00676	1.11236	0.90251	0.956186	1.01177										1.6028	0.809139	0.685685	1.46316	0.700483
	0.578096	0.670299	1.15969	0.719744	1.06163	1.1436										1.42635	0.507974	1.36885	0.785277	0.885796
	0.815786	0.874379	1.25842	0.76225	1.30341	0.695633										1.30056	1.02266	0.966985	1.0393	0.922738
	1.01747	0.954244	1.09285	1.13842	1.40986	1.30163										1.43525	1.25446	0.662322	1.06724	1.03571
	0.932699	1.05727	0.956017	0.710551	0.741885	1.25085										0.958504	0.626322	1.05637	0.738898	0.909865
	1.51687	0.944601	0.995432	0.778403	0.691443	0.900779										0.970812	0.547543	0.655362	0.982937	1.10903
	0.84226	0.99282	1.0242	1.13513	1.27084	1.34604										1.28962	0.897278	1.0351	0.802176	0.890204
	0.793039	0.891851	0.564743	1.12372	0.843384	1.04503										0.800076	0.924373	0.848285	0.865633
	0.876246	1.12315	1.16591	1.02617	0.822161	1.62119										1.42155	0.532604	0.720554	0.65335
	1.2152	0.96589	1.28618	1.25236	0.721363	1.41009										1.36507	1.1278	0.601139	0.895734
	0.756782	1.07153	0.579297	1.26859	1.24655	0.930603										1.55067	0.769275	0.805103	0.841171
	0.805137	0.819057	1.10654	1.40891	0.88939	1.69825										0.617266	0.703849	0.941036	1.28125
	1.39498	0.821846	1.05591	1.2739	0.774756	1.32915										1.76667	1.0152	0.983295	1.012
	0.761232	0.930216	0.72956	0.974493	0.952651	1.01141										1.61869	0.948593	1.68069	0.675533
	1.15336	1.25178	1.02295	0.85354	1.29365	1.34112										0.605325	0.758901	0.764623	1.04735
	0.832583	0.873006	0.779607	0.763014	1.35966	0.963947										0.608113	1.44363	1.29268	0.92109
	0.764647	0.915493	1.02188	1.30208	0.779671	1.02355										0.983398	1.49744	0.657796	0.822955
	0.569968	0.783026	1.22993	0.828537	1.06139	1.08277										0.67046	1.00564	1.01602	0.626573
	0.815631	0.657552	1.75977	1.36357	1.21551	1.06279										0.90441	0.337626	0.682516	0.758444
	0.887143	0.984512	0.918531	0.983339	0.809402	0.689922										0.767347	1.011	1.33772	0.609623
	0.642317	0.915741	0.837663	0.942937	1.24624	0.962456										1.28122	0.666929	0.689359	0.857728
	1.11465	1.29274	0.801547	0.956295	0.96188	1.70462										0.712191	0.757388	0.989002	0.69192
	0.986413	0.782244	1.10924	0.987335	0.662524	0.909193										0.514942	0.807792	1.04481	0.838132
	1.73524	0.982029	1.02882	0.939125	1.61304	0.638561										0.680081	1.28325	0.972282	0.950066
	1.03857	1.44048	1.61465	0.942885	0.733736	0.809571										0.470919	0.808917	0.687274	0.674031
	0.857771	0.712027	1.25971	0.708389	1.03359	0.756658										1.23872	1.09694	1.38859	0.87715
	0.744683	0.463042	0.548112	0.873197	0.904307	1.35459										0.94122	0.791201	0.910568	0.731656
	0.94601	0.817067	0.738346	0.884553	0.645963	0.983933										1.13261	0.874906	0.823059	0.852718
	0.693469	0.701733	0.75283	1.18486	1.16615	0.99388										1.09193	0.760242	0.413786	0.819402
	1.03432	1.09988	1.41668	0.53234	0.920202	0.887618										0.818975	0.542781	0.670261	0.581523
	0.690686	0.919278	0.748056	1.12195	0.561415	0.83249										0.976531	1.09158	0.921367	0.66013
	1.45228	0.917473	0.926662	0.89063	1.39666	0.903098										0.841003	0.595853	0.721404	0.930927
	0.798037	1.08287	0.889992	0.680847	2.05419	1.33519										1.14431	0.732859	0.849681	0.768132
	0.789642	0.895302	0.792391	0.857762	1.44587	1.58927										1.48078	1.2088	0.671231	0.883983
	1.25524	1.17612	1.17365	1.12957	1.02239	1.01477										0.894017	1.22751	1.15769	0.704981
	1.002	0.658743	1.30527	0.910036	1.47215	0.826813										1.82594	0.966254	0.505856	0.633704
	0.964953	1.24188	0.83816	1.79089	0.786884	0.81219										1.15762	0.608805	1.08686	1.32087
	1.23502	0.845142	0.62431	1.15747	1.03583	1.00728										1.1669	0.675535	0.334518	0.709141
	1.04429	0.899379	0.96386	0.64862	0.668407	1.5731										0.957931	0.840655	0.864221	0.58033
	0.731339	0.6273	1.48892	0.487662	1.18984	0.471735										0.833744	0.776195	0.80798	0.994829
	0.86602	0.973142	0.912084	0.709733	1.84548	1.20379										1.03626	0.756731	1.09381	0.563851
	1.02175	0.522674	0.387103	0.785084	1.1924	1.00075										1.21885	0.65418	0.83387	0.858632
	0.49802	0.290253	1.24272	1.02138	1.06844	0.825216										0.903678	0.893398	1.31177	0.659052
	1.21024	1.66567	0.739518	1.16428	0.916833	0.702127										0.674048	0.975774	0.550183	0.86341
	1.14215	1.06122	0.953964	1.18259	0.550283	0.75436										0.976853	0.787025	1.01967	1.32595
	1.32895	0.856278	1.14621	1.02329	0.885031	1.05137										1.34819	0.821038	0.97394	0.857413
	1.42271	0.794092	0.802209	0.992879	1.20334	0.947109										0.577934	0.659367	1.41222	1.60253
	0.78628	1.33503	1.18518	1.24904	1.43379	1.35333										1.63207	1.42031	0.639579	0.878119
	1.79746	1.00327	1.1148	1.08823	1.67673	1.41719										1.14945	0.573734	1.24523	0.410433
	1.1085	0.889855	1.10572	0.683158	1.35303	0.841004										0.946833	0.82553	1.02413	1.05279
	0.744289	1.56175	0.696201	1.1652	0.77506	0.984986										0.792893	0.459481	0.686436	1.04284
	1.4979	0.521923	1.15616	0.841684	0.680418	1.4361										1.23957	0.817064	1.02096	0.555058
	0.833356	1.22772	1.17324	1.39602	1.17649	0.49358										0.624642	1.13389	0.995066	0.859042
	1.1975	0.981301	1.04714	1.18085	1.17177	0.520779										0.746516	0.738609	1.19589	0.704392
	0.906972	1.02912	1.08384	1.04381	1.42576	0.977985										0.776096	0.886212	0.752823	0.671134
	0.834029	0.881559	1.23137	0.979586	1.12801	0.74019										0.732859	1.71782	0.750715	0.847426
	0.97732	0.747153	1.20338	0.969464	0.723078	0.93322										0.670652	1.01849	0.993903	0.801172
	0.673011	0.755486	0.736945	1.32553	0.925511	0.799823										1.48148	1.30685	0.909663	0.935499
	0.715502	0.382209	1.48343	0.753965	1.04912	0.949283										1.04654	1.05817	0.782682	0.919955
	0.644767	0.764535	0.785876	0.899161	1.79133	0.935618										0.900786	1.1077	0.713886	1.01646
	0.931523	0.804458	0.726472	1.20453	0.737651	1.0816										1.07111	0.705286	1.13522	1.07983
	1.03238	0.938973	0.712407	1.1426	0.97873	0.760174										1.21183	1.91799	0.661696	1.2974
	1.30647	0.855581	0.879943	0.879442	0.941347	0.775242										0.664908	0.651109	0.6695	0.80046
	0.757078	0.531088	0.718672	0.811993	0.922301	0.798503										0.70195	0.32331	0.962479	0.737821
	1.38559	0.915054	0.626471	1.73153	1.59576	0.66097										1.18269	0.654038	0.957926	0.872563
	0.765022	0.557228	1.087	1.94607	0.596411	0.974566										0.981412	0.673088	0.600383	1.02635
	0.763015	0.993133	1.13456	0.731556	0.976126	1.13372										1.31211	0.711281	1.14811	1.06751
	0.960305	0.859639	0.431677	0.951476	1.69891	0.833824										1.08262	0.764681	0.768884	0.873695
	1.02633	0.695285	0.909977	1.05689	1.37703	1.19374										0.754567	0.52401	1.16661	0.888777
	1.12792	0.833425	1.0243	1.08678	1.18572	0.829783										0.946084	0.637628	1.13109	0.753573
	1.19196	0.749813	0.618744	0.608206	1.17324	0.943667										1.28666	0.82122	0.641608	0.728351
	0.837519	0.836569	0.848038	0.788246	0.963859	1.07147										1.04423	1.01173	0.488568	0.462965
	0.876812	0.610954	0.662331	0.68363	1.36506	1.3596										0.864907	0.687995	1.07625	0.639018
	1.04685	0.838366	1.0405	0.561603	0.757711	1.0127										1.27929	1.30997	0.788873	0.82779
	0.750161	0.758181	0.868495	1.4086	0.955548	0.967988										0.949315	0.562255	0.944466	0.814498
	0.973171	0.546339	1.0507	0.978384	1.18439	0.949033										0.359583	0.680095	0.969637	1.04875
	0.894107	0.939936	1.1625	0.988609	0.942371	0.875079										0.663655	0.723372	0.882744	1.7193
	1.26622	1.01802	0.67457	1.03519	0.798365	1.0533										1.3227	0.709019	0.572804	0.631368
	0.910836	1.28487	0.863766	0.829137	0.866951	0.85113										0.65356	0.862756	0.757398	0.771165
	1.27891	0.929437	1.27556	1.08078	0.940174	1.56738										1.54226	0.682337	0.924764	0.738909
	1.34617	0.796592	0.988721	1.15788	0.745162	0.952004										0.844575	0.611838	1.0647	1.06018
	0.683736	0.621278	1.01311	0.586678	1.82212	1.31589										0.700589	0.98734	0.767103	1.20184
	0.660491	0.561021	0.6985	1.13026	1.0115	1.25956										0.841028	0.68122	1.02982	1.05996
	0.934829	0.84907	0.954588	1.00755	0.797362	0.708513										1.22298	0.61825	0.739429	0.851056
	1.10978	0.825756	1.21742	0.905934	1.00413	0.971708										0.971957	0.753665	0.898678	1.1535
	0.950945	1.14817	0.909521	0.708104	0.993605	0.639439										0.667099	0.576983	0.557893	1.08858
	0.956382	0.753681	1.17284	1.00263	0.762878	0.693926										1.03106	0.927221	0.635877	0.790404
	1.33431	0.518748	0.535216	1.76046	1.06283	1.14183										0.5984	0.964028	0.788771	0.981127
	0.910087	1.10801	1.30093	1.4208	1.33715	1.0605										0.648481	1.61759	0.755756	0.607434
	1.17609	1.30375	0.847864	0.590777	0.937778	0.64797										1.2804	0.99853	0.895356	0.982162
	0.780231	0.800267	0.692631	0.481554	0.933795	0.943113										0.490939	0.76965	1.29297	0.814995
	0.910787	0.516124	0.961778	1.03923	1.09375	1.55127										1.16213	1.05199	0.710661	1.13307
	1.32195	0.784273	0.718008	1.65248	0.470282	1.54622										1.12684	0.802654	0.840447	0.84361
	0.557854	1.14867	0.632097	0.979267	0.891453	0.712493										1.4792	0.738249	0.612129	0.855677
	0.870586	0.983321	1.54707	1.31	0.913768	0.866234										1.67134	0.798704	1.0589	0.690606
	0.650747	0.796418	0.909469	0.476532	0.832655	0.338747										0.977308	0.831509	0.686733	0.541707
	1.11343	1.21393	0.507203	1.27411	0.723013	0.555274										1.10401	0.965527	1.02579	0.696921
	0.765107	0.535335	1.33466	1.01771	1.23338	1.11057										1.14059	1.15885	1.14939	0.892763
	0.833052	1.06975	0.68282	0.829857	1.06787	0.899004										0.881997	1.06153	0.8834	0.641464
	0.829328	1.52924	0.90326	0.799367	1.17912	0.69756										1.54193	0.893058	0.607653	0.860779
	0.766681	0.438368	1.18167	1.12363	0.849739	1.29935										1.22055	0.763352	0.850885	0.513356
	0.839932	1.68047	1.04218	0.862386	1.05832	1.61553										0.793032	0.745305	0.600194	0.737398
	0.760523	0.718253	1.22234	1.01134	1.35398	0.33091										1.26673	1.23068	0.828533	0.83481
	0.894138	0.857682	0.971351	1.07577	0.939349	0.930003										1.19759	0.864118	0.783982	0.798044
	1.09166	0.753461	0.946714	1.05624	0.983963	0.700485										1.58454	0.721991	0.943417	1.37074
	0.658417	0.549939	1.35377	1.13147	0.979245	1.38818										1.04265	0.660614	1.29424	0.663724
	0.954901	0.997839	1.43544	1.06798	1.07912	0.941588										0.907067	0.893559	1.17606	0.67586
	1.04025	1.00786	0.951445	1.17495	0.787599	1.02075										0.954375	1.06847	1.30284	0.863302
	0.741654	0.796918	0.837959	0.877908	0.81961	1.4114										0.688498	1.44903	0.691146	0.772206
	1.50061	0.845347	0.81837	1.06462	0.792493	0.784518										0.888762	1.17696	1.13812	0.757017
	0.996328	0.506942	1.46053	1.02936	1.29374	0.788093										0.729562	0.759318	0.740276	0.740218
	0.797906	1.09171	1.10485	0.817603	0.909964	0.783799										0.689663	0.791799	1.40299	0.88364
	1.08649	0.70827	0.918544	1.02101	0.761418	0.663927										0.829843	1.12399	1.11339	1.11483
	0.864262	0.784081	1.18431	0.761616	1.10423	1.23769										0.65005	1.29455	0.721336	0.760562
	1.99605	0.754394	0.671608	0.742886	0.857484	0.869335										1.24804	0.727599	1.0627	1.18372
	0.632533	0.765474	0.871102	0.930092	1.14824	1.1991										0.820166	0.578596	0.775288	0.888706
	0.850929	0.994132	0.99367	0.801159	1.13335	1.57858										1.00604	1.15438	0.820157	1.10707
	0.743413	0.894651	0.939626	1.45717	0.56411	0.598376										0.727947	0.787981	1.23206	0.77899
	1.05375	2.17911	0.708401	0.740531	0.858962	0.802358										0.954087	0.699774	1.15708	1.20178
	1.28071	0.942786	0.860384	0.810247	1.53815	0.681207										1.26748	1.28627	0.730244	0.962313
	0.713983	0.815405	1.03455	1.37745	1.01291	0.977682										0.981357	0.701754	0.627784	0.875956
	1.39281	1.20096	1.33017	0.887038	1.14654	1.0587										0.939283	0.605389	1.54666	0.752938
	1.26507	0.879949	1.037	0.853333	1.09626	0.999098										0.865041	0.842383	0.811278	0.769775
	1.00025	1.06285	0.980511	1.79811	1.08016	1.05923										1.14258	0.749609	0.742253	0.966476
	0.982718	0.939944	0.791953	1.18517	0.515261	0.952994										0.947427	0.788175	1.41673	1.16181
	0.571443	0.883368	1.28083	1.87046	0.985542	0.89718										0.902978	1.03949	0.917048	0.86188
	0.835746	0.746166	1.51772	0.898589	0.954388	0.743905										0.89431	0.786506	0.897597	0.87356
	0.79578	0.772633	0.654629	0.966852	1.06009	0.62324										0.967313	0.863192	0.85749	0.499932
	0.790618	0.66601	0.796217	0.752358	1.36624	0.865252										1.18185	0.924867	0.97624	0.95274
	0.936777	1.19344	0.845863	0.597919	1.0446	1.1679										1.235	1.69959	0.561048	0.78941
	0.623085	0.71519	0.757332	0.618266	0.866479	0.845229										1.80484	0.93207	0.781384	1.10095
	1.17244	1.16831	0.955376	1.00486	1.14693	0.961268										0.629648	1.02938	0.720156	0.718163
	1.43863	1.41984	1.3397	1.00058	1.4749	0.855802										1.00363	0.850203	0.974578	0.725388
	1.19579	0.802808	1.05589	0.700219	1.0612	0.625245										0.801875	0.544051	0.918131	0.56482
	0.627337	0.82072	1.02854	1.09268	0.651189	1.46316										1.04017	0.929102	1.01553	0.879392
	0.755547	0.615428	0.797021	0.672438	0.844944	1.01342										0.479466	0.999598	1.08917	0.545322
	1.05041	0.983862	1.04219	0.591017	0.964214	0.818972										1.61443	1.074	0.971158	0.883659
	1.80893	0.715921	0.631959	0.854003	0.612865	2.02403										1.65152	0.875297	1.28662	0.695791
	1.19176	0.987408	0.597538	1.14332	0.98104	0.931935										0.535857	0.82672	0.989908	0.623104
	1.07154	0.936756	1.15576	0.701675	1.02634	0.77894										0.899327	0.914997	0.819266	0.898575
	1.09182	0.997756	1.15172	0.973267	1.01039	0.762925										1.72798	0.764229	0.689915	0.832774
	0.915855	0.850421	1.26498	1.42694	1.54043	0.917351										1.24584	0.786081	1.02766	0.831543
	1.1734	1.04673	0.491092	1.23611	0.73154	0.845016										0.764503	1.12933	0.666361	0.60838
	1.10505	0.676952	0.98672	0.803879	0.690522	0.691774										0.81867	1.16643	1.40316	0.616082
	1.16818	0.714979	0.829679	1.20828	0.869904	1.16992										1.71954	1.40602	0.516465	0.825225
	0.965623	0.63448	1.25436	0.76456	0.806195	0.783768										1.14265	1.13079	0.747586	0.968257
	0.804686	1.34873	1.01436	1.32162	1.21762	1.29603										0.927845	0.573177	1.11275
	1.37762	0.680851	1.09029	0.851268	1.4707	1.11914										1.2271	1.33863	0.677969
	0.674648	0.547246	0.705902	0.937659	1.18895	1.06743										1.28562	0.618516	0.836145
	0.786653	0.546657	1.56151	1.41108	1.22204	1.3679										0.73847	0.887914	0.911329
	1.23489	0.816929	0.971471	0.919076	0.886211	0.815296										0.710162	0.856139	0.576806
	0.841125	0.858463	0.74953	1.29373	1.39669	1.64237										0.977537	0.904578	1.10594
	1.31008	0.803041	1.14494	1.58223	1.19818	1.15871										0.69162	0.785423	1.17365
	1.31468	0.780448	0.649621	1.12924	1.20752	1.08132										1.28739	1.54071	0.753303
	1.36967	1.24516	0.63489	1.49918	1.79211	1.16346										1.01549	1.1592	0.776533
	0.915531	0.859981	0.683771	0.93459	0.990892	0.661911										0.863975	0.939931	1.02421
	0.872926	1.33764	0.484168	0.720168	0.828453	0.808642										0.915896	1.29177	0.82641
	1.02487	1.53925	0.565825	1.02462	1.20193	0.593631										1.69111	0.601321	0.646537
	0.902243	1.19214	0.986045	1.01911	1.13955	1.20903										0.621599	0.605785	0.832351
	0.974041	1.08924	1.46137	0.861685	1.08215	1.04639										1.18294	1.0087	1.39734
	0.907304	0.962629	0.95175	0.652861	1.24957	0.960741										0.411894	0.723384	0.889806
	0.866919	1.12681	1.06509	1.58471	0.521397	1.32156										1.11464	0.664204	1.00715
	0.643218	1.09754	0.806977	0.953564	0.894974	1.00573										0.956079	0.619436	0.899766
	0.930786	1.12071	0.827409	1.24987	1.06558	1.25995										1.02175	0.941823	0.559495
	0.962496	0.701648	0.891969	0.836171	1.28627	1.51931										0.701592	1.04648	1.24549
	0.823477	0.901959	0.778272	0.81452	0.828577	1.57243										0.831068	1.08308	1.36677
	0.614822	1.29006	1.1229	1.07114	0.968487	1.06839										1.68175	0.860569	0.690424
	1.40194	0.73811	1.00379	1.01931	0.860548	1.27586										0.531325	0.615146	0.937324
	1.20224	0.738909	0.705793	0.968944	1.00132	1.23887										0.772948	0.390087	0.868404
	1.43775	0.775154	0.612385	1.69457	1.09126	1.22209										0.951965	0.86262	1.12533
	0.855039	0.587274	0.44229	1.4302	0.80035	0.779222										0.936589	0.888526	0.858488
	0.830121	1.05244	0.807011	0.938025	1.35997	1.23553										0.763141	1.22464	1.18638
	0.850752	0.742998	0.855962	1.04045	0.986493	1.08405										0.832018	1.69477	1.13619
	0.81792	0.817502	0.855247	1.1167	1.16151	0.964537										1.44791	0.619756	0.997175
	1.71543	0.563679	0.465585	1.14736	0.736957	0.696913										1.43003	0.686272	0.847816
	1.33401	0.982763	1.00328	0.578812	1.1085	1.01343										0.862988	0.722679	1.00494
	0.894036	1.41959	1.04709	0.552445	0.640272	0.884077										0.940107	0.857893	0.857491
	0.599918	0.955913	0.790726	0.893713	1.30485	0.556589										0.618426	0.671254	0.534127
	0.939151	0.943266	0.777398	1.24087	0.916934	1.03985										0.802743	0.814386	0.602469
	0.936184	0.950988	0.780258	1.86276	1.49827	0.718832										1.14584	0.939345	1.05147
	1.00065	1.06296	0.965315	1.09251	0.957924	0.853639										0.942056	1.13646	1.39335
	1.11588	0.774127	1.16296	0.44427	1.05085	0.639023										1.3103	0.726425	0.760886
	0.785527	1.14675	0.929949	1.76205	1.12136	1.07904										0.719257	0.633915	0.708198
	0.851842	1.09558	0.770287	1.07899	0.863723	0.912347										0.459481	0.691786	0.725788
	0.931851	0.78328	0.645	1.10439	0.802291	1.27502										0.839851	1.03818	0.995401
	1.16077	0.763059	0.925169	1.6134	0.875568	0.720938										0.948935	1.20967	0.832653
	0.93111	0.703703	0.721719	1.21452	0.672716	1.15167										0.525733	0.961557	1.07516
	1.29462	1.38473	0.744205	0.50048	1.46908	1.60197										0.943915	1.18786	0.801208
	1.63611	0.912505	0.779447	1.08761	0.970185	1.39553										0.805371	0.871088	0.77129
	0.842874	0.919256	0.733802	0.979475	1.24845	0.979191										0.640023	0.613413	0.494203
	0.50005	0.479071	0.599913	0.838476	1.78229	1.55685										1.11851	0.747698	0.707193
	1.02954	1.13486	0.778078	0.794363	0.929993	1.04408										0.80937	1.1004	0.97284
	0.943136	0.942853	0.896096	1.0169	1.00361	1.22394										1.36338	0.731055	1.30531
	0.73299	0.902558	0.966897	1.09848	1.10435	0.42338										0.949671	0.773578	0.928447
	1.51134	1.64757	0.929357	1.11174	0.941421	1.30934										0.933934	1.10419	0.587509
	1.36628	1.16822	0.739587	1.13894	0.660794	0.766147										0.914663	0.896753	0.971877
	2.10657	0.622675	1.04622	1.33778	0.948641	0.586607										1.46416	0.930414	0.684489
	0.559474	1.01737	0.954303	0.906297	0.856185	0.996341										1.17043	0.975885	0.739489
	1.21277	0.904099	1.0232	0.514979	1.48276	1.60393										1.85672	0.743696	0.681291
	0.884019	0.759415	0.99383	0.808444	1.06367	0.518583										0.845835	0.808205	1.07733
	0.960126	0.672139	0.905964	1.63135	0.983838	0.540097										1.13002	0.847961	0.966205
	0.769556	1.33643	1.06946	0.583252	1.2823	0.873253										0.714882	0.66606	1.59689
	0.936123	0.942341	0.665102	1.38895	0.91093	1.32907										0.834074	0.943898	0.71156
	1.01232	0.844961	0.490569	0.971795	1.88966	1.15309										0.988795	0.979109	0.6008
	1.06215	0.705587	1.02618	1.24555	0.799432	1.42921										1.47541	0.723588	0.595103
	1.42817	0.914351	0.864673	0.979128	1.0384	1.74107										0.880078	0.440821	0.816667
	1.1027	0.814022	0.551676	0.98753	1.16093	1.20796										0.912671	1.19702	0.788662
	0.868136	0.709095	0.621582	1.3327	1.01617	1.01877										0.840485	1.41365	0.498643
	0.954259	0.707521	1.00343	0.77506	0.825637	0.630862										0.574851	1.15469	0.992449
	1.49487	0.600908	0.610157	0.919634	1.0999	1.72931										1.0575	0.744249	1.29886
	0.801719	0.665912	0.927041	0.895033	0.937162	1.19696										0.49443	1.10836
	1.02604	1.17147	0.732175	1.12443	1.41792	1.16277										1.07641	1.40165
	1.22885	0.971377	0.633748	1.17389	1.00503	0.920837										1.50076	1.16984
	0.898665	0.667039	0.419059	1.09537	1.0463	1.20278										0.605222	1.12903
	1.11125	0.875207	1.21479	0.935917	1.18236	1.19421										0.833881	1.20751
	1.05625	0.351949	1.29783	2.27981	1.6509	2.10865										0.625011	1.44845
	0.724509	0.69174	0.926498	1.63759	1.00457	1.49719										1.52235	1.6764
	0.655878	0.732026	0.727811	1.06241	1.07	0.549325										1.01666	0.800018
	0.702886	0.962694	1.24063	0.674834	1.41249	1.71561										0.871615	1.06751
	0.979602	0.670546	1.21744	1.01713	1.88031	1.53801										0.981277	0.290369
	0.910067	1.47944	0.56871	0.805814	1.19674	1.01963										0.861324	1.14495
	0.957307	0.998992	0.847353	0.737386	0.736949	0.983232										0.887834	0.873507
	1.20674	1.88376	0.941848	0.513544	0.526037	1.45032										1.35892	0.498087
	0.550467	0.955269	0.861701	0.84889	0.766732	1.64451										0.873089	1.71533
	1.08631	0.88277	0.954961	1.11816	0.605341	0.656694										0.79779	0.808748
	0.719377	1.01276	0.735927	1.1642	0.980788	1.02683										1.11723	1.03196
	0.956698	1.1183	1.22107	0.894718	1.10887	1.49651										1.46216	0.500134
	0.983499	0.68891	0.689216	1.07692	1.06593	0.666535										0.673057	1.24368
	1.38521	0.98777	0.972783	1.14276	1.08706	1.17936										0.757834	0.852127
	1.20096	1.18108	0.895105	0.861019	0.797227	0.697953										0.996453	0.978423
	0.765979	0.952462	1.12395	0.955217	0.693896	1.67336										0.919628	1.24032
	0.471216	0.951158	0.85089	0.719466	1.175	1.40394										1.2944	0.75671
	0.64595	0.943876	1.02763	1.39426	1.43256	0.716995										1.0609	1.44422
	1.12899	0.602848	1.1163	0.577086	0.713195	0.974812										1.29463	0.701099
	0.783854	0.792982	0.814338	1.0826	0.901336	1.35568										0.54546	1.76155
	0.686364	0.786126	0.52701	1.88021	0.673321	0.955769										1.01431	0.659399
	0.880807	0.657629	1.45734	0.958568	0.984396	1.01158										1.36583	0.725197
	0.958447	0.780009	1.07922	1.0663	1.15966	1.23622										0.815653	0.998442
	0.727519	1.22302	0.509865	1.45532	0.85802											1.33092	0.670781
	1.19531	0.896403	0.845939	1.20701	0.769557											0.609776	1.66319
	1.47423	0.76314	1.18209	0.72117	0.842796											0.73509	0.695773
	0.702072	0.876353	0.869668	1.17953	1.68944											2.11244	0.759283
	1.03238	0.940096	1.37251	0.972993	0.887056											0.94461	0.952788
	0.928942	0.864362	0.884207	1.56071	0.944568											0.975385	1.19661
	1.22877	0.730127	1.04273	1.28973	0.943061											1.03923	0.823824
	1.22629	1.17407	0.657575	0.937405	0.984626											1.98249	0.810022
	0.575253	0.662808	0.893082	0.734807	0.708743											0.88456	0.767439
	0.928519	0.547478	0.608785	1.19745	0.916812											1.22975	0.839931
	0.811601	0.982242	0.790342	1.52324	0.629382											1.10792	0.977489
	1.06336	1.15623	0.768174	0.895711	0.718666											0.911214	0.862781
	1.03616	0.747855	0.952261	0.933133	1.27362											0.673726	0.720901
	0.752337	0.785703	1.09101	0.710669	1.00664											0.506928	1.54218
	0.950493	1.22332	0.90715	0.865193	0.824762											1.40443	0.669567
	0.788922	1.20244	1.42978	1.10493	0.719187											1.13301	0.899792
	0.581256	0.890072	0.807364	0.885136	1.06693											1.13761	0.879512
	1.46424	1.12182	0.935968	0.786001	0.832722											1.67314	0.779899
	0.79023	0.696124	0.956126	0.903309	0.713812											1.43031	0.903749
	1.25652	0.46615	1.09364	1.00267	0.445228											0.86643	0.931047
	0.900538	1.29387	1.49784	0.992936	0.745134											0.586634	1.08479
	2.02974	1.06381	0.973219	1.13596	0.955653											0.870872	1.10155
	1.29962	0.996983	0.661424	1.51709	1.08552											0.792068	0.667942
	0.379271	1.07882	0.814403	1.29436	0.982952											0.580127	0.969155
	0.887378	0.643812	0.922072	1.50494	1.09735											1.06609	0.633672
	1.29735	0.867511	0.790628	0.990265	1.15585											1.08722	0.811691
	0.683427	0.869755	0.567169	1.21448	1.23531											0.947634	1.09071
	0.698526	0.620397	0.986178	0.984602	0.914627											0.552267	0.697769
	1.2139	0.886277	1.27976	0.872445	0.860705											1.18314	0.782187
	1.29645	0.626395	0.77864	1.02608	1.02783											0.798764	0.73287
	0.776082	1.08298	0.759115	0.418956	1.08549											0.64525	0.608081
	1.28038	0.911239	0.598618	1.13007	1.05975											0.942148	0.862641
	0.873816	0.771084	0.768773	1.31779	1.66078											0.875224	0.928432
	0.756792	0.918509	1.39921	1.16501	0.896315											1.52887	0.82812
	1.20646	0.841803	1.06363	0.68383	0.921763											1.28333	0.980618
	0.874893	0.718937	1.92755	1.00886	0.995819											1.03346	0.465002
	1.05264	0.541262	0.817068	1.69173	1.06391											1.04431	1.15826
	1.05088	0.883698	0.964385	1.56921	1.14483											0.759409	1.54492
	1.05365	0.85066	0.750398	0.817469	0.671551											1.19648	1.01542
	0.827658	0.687938	0.989448	1.14138	1.11341											1.13	0.935087
	0.746197	0.968769	0.644024	0.565562	1.58083											0.790842	0.699499
	0.622818	0.932192	0.824081	1.20503	1.08085											1.44809	1.02024
	0.677906	1.24161	0.879089	1.105	0.872168											1.08947	0.490014
	1.26021	0.517365	0.4372	1.31711	0.957213											0.687161	1.95181
	0.821113	0.890321	0.712567	0.82972	0.903705											1.03645	0.742203
	1.00052	0.897653	0.684409	1.53199	0.81984											0.666263	1.0924
	1.25959	0.938184	0.583041	1.50051	0.787973											1.02307	0.92104
	0.97136	0.907985	1.27951	1.21563	1.02634											0.924078	1.18948
	0.904566	1.51667	1.3003	0.664494	0.665398											0.434947	0.450636
	1.07724	0.864922	0.673072	1.05357	0.852614											0.81999	0.64073
	1.03624	0.924752	0.704695	1.476	0.866542											0.801996	0.643833
	1.06808	0.682431	1.26237	1.22869	1.25649											1.48883	0.530315
	0.537679	0.872172	0.900391	0.806404	1.06573											1.39869	0.900534
	0.678776	0.886493	0.90415	0.991336	1.02037											1.11072	0.673461
	0.634936	0.900782	1.04493	1.11445	1.07788											1.02058	0.735245
	0.838456	0.946959	1.20049	0.733278	0.78386											0.904923	0.905935
	0.637111	0.728606	0.863632	1.04523	1.18642											0.885113	0.76396
	1.12558	1.03169	1.73191	0.652222	0.581149											0.961667	0.790797
	0.440889	0.940394	0.851642	1.07562	0.935991											0.851021	0.769425
	0.977745	1.09348	0.970362	0.989855	1.58076											1.34396	0.99846
	0.893114	0.618388	1.23278	1.20128	1.2617											1.54971	0.806003
	0.900282	1.15731	0.813703	0.441057	1.22445											1.0755	0.918653
	0.867969	0.896016	1.3944	1.33171	1.10086											1.15922	0.972002
	0.920217	0.830971	0.492346	0.851576	0.853104											0.703186	0.568857
	1.50535	0.728525	1.03569	0.742198	0.865676											1.42359	0.683898
	0.725778	0.811676	1.56821	0.695217	1.60072											0.61049	1.5755
	1.44842	0.656999	1.07768	1.36529	1.00464											0.875066	0.56755
	0.753829	0.75855	0.650684	0.998662	1.04993											0.881497	1.19448
	0.616834	0.642485	0.873201	1.07372	0.707748											0.863366	0.810747
	0.874321	1.02555	0.742309	1.18167	0.868119											0.700457	1.01492
	0.903945	0.724278	0.82338	0.932235	0.971133											0.851431	1.2074
	1.25703	1.36865	0.85775	0.557894	1.66042											1.27391	0.733554
	0.965348	1.73865	0.875272	1.08953	1.6371											0.431914	0.830277
	0.924785	0.780381	0.717915	0.667437	0.58657											1.2793	0.753993
	1.2716	0.814423	1.11991	0.88196	0.953822											1.68059	1.08486
	0.891566	0.839993	0.955441	2.2395	1.53306											0.866383	0.793705
	0.799909	0.676191	1.72911	1.23792	1.11456											0.706785	0.726759
	0.928109	0.845007	0.757869	1.37748	1.45063											1.16274	0.880431
	0.651188	0.878988	0.77101	1.24231	0.755962											0.875944	0.750984
	0.621096	1.39705	0.68673	0.686299	1.05601											0.683042	1.16661
	0.76687	0.658491	0.849863	1.00779	1.41236											0.773293	1.05025
	1.66996	0.653865	0.606428	1.75179	1.06474											1.36446	1.80665
	0.624807	1.24649	1.1428	1.27269	1.00835											0.960704	0.584154
	0.7374	1.4463	0.695295	0.881014	1.02571											1.24268	0.762969
	1.21852	0.894698	0.83744	0.81068	1.46417											1.60885	0.868688
	1.20836	1.13189	0.350339	0.589684	0.82611											0.822254	0.592816
	0.688377	0.747763	1.02072	1.73329	1.23958											0.75682	0.777813
	0.746361	0.710508	0.831255	1.14684	1.37382											1.09592	1.02018
	0.849304	1.21675	0.85452	1.06284	0.64459											0.685371	0.795241
	0.710148	0.757298	0.971338	0.9824	0.670082											1.0782	0.784367
	0.569616	0.733296	1.10822	1.05861	1.26041											0.752902	0.884128
	0.731537	0.490326	0.720933	1.63126	0.886211											1.13347	1.04966
	1.07623	0.735452	0.462213	0.636282	0.915687											1.34401	0.894293
	1.40918	1.21855	0.729739	0.816927	1.22546											0.783785	1.52018
	0.573215	0.810195	0.86655	1.01128	0.874909											1.04092	0.815538
	2.09872	0.810306	0.921184	0.913171	1.564											0.693514	0.958052
	0.632119	1.15318	1.0798	1.4923	0.783486											0.92992	0.725842
	1.28782	0.752012	0.682124	1.04053	1.13464											0.996409	1.14384
	0.942269	1.59515	0.834893	0.68574	0.9729											0.833544	0.800864
	0.991983	0.897359	0.84482	1.22338	0.97558											1.41998	1.69396
	1.69776	0.556385	0.881402	1.12119	0.756273											0.928332	1.05552
	1.24624	1.01062	0.714177	1.0116	1.01576											1.0131	0.925237
	0.732753	1.21244	0.864883	1.01967	1.0072											0.793112	0.535468
	0.969493	0.789222	0.806368	0.924475	0.856158											1.36404	0.672706
	0.757978	1.12753	0.575675	0.692781	1.11212											0.894068	0.671638
	0.510973	0.659096	0.804696	0.623465	0.585138											0.961412	1.41445
	1.3806	0.896608	0.790496	1.52044	1.44292											1.13724	0.572218
	0.861808	0.79007	0.298702	0.464998	0.978247											0.976466	0.88017
	1.56057	0.829139	0.862518		1.27627											0.924479	0.87551
	0.969682	1.60429	0.72739		1.20855											0.454156	0.722002
	0.876317	0.923963	0.774983		1.24252											0.376007	0.894955
	0.714628	1.00775	1.26737		0.883128											1.17369	1.04616
	0.995694	0.756383	0.801144		0.935181											0.989856	0.839781
	0.921137	1.2361	1.05863		0.722397											1.4241	0.751833
	1.04352	0.907954	0.621393		1.18028											1.12921	1.2784
	1.18231	1.4733	0.72094		1.09788											0.88896	0.643908
	1.08261	1.15843	0.966592		0.540984											0.797092	0.933606
	1.18579	0.616898	0.903829		1.09857											1.08649	0.894327
	1.28378	0.897324	1.09828		0.992115											1.38127	0.586566
	0.845848	0.873445	1.0562		1.04654											1.0685	1.1554
	1.19554	0.700622	0.694458		0.949489											0.877752	0.694621
	0.637048	0.583926	1.09098		0.62863											0.944332	0.973473
	1.27626	1.00329	0.804201		0.974792											0.773542	1.11068
	1.55038	0.596534	1.24935		0.931027											1.17378	0.757052
	0.925627	0.846708	0.91004		0.984704											1.035	0.834011
	0.885461	0.921185	0.821623		1.05965											0.721048	1.11562
	1.94505	0.859266	0.97613		0.704148											1.22213	1.26425
	1.26345	0.790026	0.628169		1.29751											0.950311	0.834112
	1.44236	0.795734	0.854234		1.07758											0.70079	0.754215
	0.40235	0.894408	0.823807		0.812295											0.735048	1.04398
	1.04771	0.798888	0.500741		0.736268											0.769038	0.671715
	1.62114	0.700299	0.639074		0.969918											0.673408	0.730013
	0.669926	0.838694	0.631391		0.981302											0.848661	0.817013
	1.50442	0.828664	0.920653		0.679501											0.673099	1.232
	0.821687	0.875069	0.873903		0.642502											0.803511	0.44848
	0.782452	0.525932	1.14298		0.616583											0.834261	0.602782
	0.915736	0.974188	0.995499		1.18452											1.61494	0.85164
	0.880526	0.961675	0.914388		0.887221											0.945163	0.932631
	1.27192	0.71674	1.60044		0.910419											0.715382	0.767034
	0.823786	0.841437	1.24251		1.06926											1.2209	1.16117
	0.973906	0.808648	0.792399		0.786311											1.36988	0.990852
	0.966241	0.972072	0.994747		0.545938											1.08042	0.898736
	1.22623	0.658074	0.721788		0.740439											0.919913	0.662234
	1.08103	0.703434	1.19885		1.54823											0.89913	0.760751
	0.696712	0.592841	0.700853		0.821879											1.19832	0.902054
	1.18878	0.992978	0.943548		1.30648											1.07792	0.723365
	0.881697	0.951664	0.734557		0.591933											1.17683	0.549048
	1.00919	0.721345	0.857614		0.862251											1.52306	0.642958
	0.790189	1.05217	0.680259		0.862424											1.42015	1.54738
	0.904468	0.547854	0.99194		0.799967											0.515919	0.65282
	1.01235	0.778551	0.871185		1.16402											0.642064	0.862562
	0.886323	0.977195	0.831132		1.04806											0.891032	0.546387
	1.25285	0.996911	1.01311		0.867643											1.13116	0.839688
	1.17211	1.02909	0.395371		0.824907											0.705795	1.03548
	0.999175	1.25524	0.851628		0.828612											1.2779	0.575696
	0.946701	0.922347	1.11004		1.82135											0.996129	0.935242
	0.716922	1.27961	0.908971		0.709945											1.28443	0.780632
	0.753058	0.993459	0.933824		0.686674											1.65312	0.897462
	0.716641	1.02037	0.636098		0.860474											0.797899	0.648163
	1.13354	0.913827	0.768297		0.678898											1.40183	1.31114
	1.00765	0.772088	0.736296		0.899328											0.720449	0.796871
	0.905826	0.386597	0.714435		0.568301											0.639211	1.00687
	0.684349	0.551876	1.32166		0.506934											0.573264	0.844614
	1.30093	0.911974	0.722881		1.1503											0.479353	0.64246
	0.845938	1.09379	0.696016		1.14016											1.16526	0.734317
	0.898328	1.19903	0.443745		1.09966											1.21912	1.38669
	1.61587	0.826114	0.902613		0.351721											1.49863	1.09906
	1.06312	0.929098	0.702875		0.771031											1.20136	0.743902
	0.959451	0.981825	0.701812		1.15216											1.57958	0.565762
	0.896461	0.937801	1.38719		0.845214											1.03111	0.552805
	0.801451	0.73529	0.719737		0.708021											0.714523	0.495117
	0.820922	0.812246	1.10378		1.12693											0.693622	0.749308
	0.681118	1.08127	0.573806		0.990675											1.61563	0.750031
	1.10692	1.25319	1.20306		1.30448											1.70121	0.78143
	0.903065	0.586406	0.936708		1.23744											1.45037	0.633177
	0.484784	0.732817	1.09033		0.964605											0.837687	0.825694
	1.08659	0.652652	1.02412		0.965442											0.674324	0.488791
	0.852106	0.737115	0.862575													0.967797	0.725403
	0.863692	0.866139	0.618418													0.609552	0.893187
	1.06078	0.964988	0.590496													1.97802	0.497372
	1.20165	0.59034	1.06964													1.00395	1.04837
	0.783401	0.600047	1.03736													0.85174	0.826988
	1.07129	0.7257	0.725041													1.04256	0.861368
	0.840488	0.880395	0.86227													1.54348	1.81783
	1.33776	0.657271	0.702709													1.33864	1.02914
	1.11517	0.894837	0.952161													1.32079	0.954359
	1.36285	0.76288	1.30986													0.969408	1.26739
	0.897071	0.80724	1.23064													0.746588	0.960228
	1.12156	1.0574	1.10083													0.819195	0.970438
	1.16269	1.09131	1.0222													1.14849	0.648427
	1.03648	1.06686	0.844491													0.590887	0.514141
	0.758849	0.645796	1.12221													0.920734	1.07553
	0.393509	0.861978	0.955741													1.2521	0.643515
	1.25911	0.843154	1.33332													0.993196	0.728201
	0.881149	0.869007	0.650394													1.09565	0.701643
	0.732102	0.754813	1.11282													0.903557	0.658987
	1.02182	0.767409	0.805618													0.841184	0.636941
	0.609287	0.967947	0.999204													0.922607	0.992361
	0.546016	1.33627	0.894478													0.820248	0.775797
	0.824262	1.10264	0.819429													1.32736	0.791555
	1.5211	0.839018	0.867528													1.23045	0.608904
	0.759509	1.11061	0.703081													1.1874	0.448373
	1.53948	0.631353	1.23766													0.710254	0.818486
	0.96362	1.12747	0.95016													0.980157	0.661883
	1.45732	0.755054	0.435942													0.954346	0.885038
	0.796695	0.819772	0.69393													1.17673	0.712624
	1.28889	0.873941	0.496834													1.22139	0.705542
	0.951323	0.957317	0.884167													1.2923	1.14568
	0.650181	1.15184	0.620264													1.20097	0.540285
	0.853149	0.756265	1.16789													0.595809	0.810986
	0.716079	1.21376	0.679542													1.70497	0.829974
	0.785937	0.66016	0.517872													1.83317	0.721676
	0.770311	0.795689	0.987252													1.16492	1.00499
	1.12962	0.578317	1.07676													0.75898	0.755845
	0.895144	0.739356	0.833059													0.747414	1.04795
	0.929522	1.03295	0.943883													0.594516	1.00557
	1.32817	1.05028	0.761314													1.45221	1.15521
	1.59731	0.676895	0.672634													0.640164	0.716071
	0.693608	0.598556	1.1041													0.802656	0.987979
	0.967175	1.16672	1.09005													1.78516	0.573072
	0.87007	0.609238	0.972198													0.537853	1.04664
	0.954344	1.26015	0.772704													0.481193	0.801602
	1.12526	0.914044	0.638936													1.46586	0.830881
	0.785789	1.06061	0.808933													0.822971	0.960546
	0.892355	0.842721	0.810372													0.673643	0.971332
	0.722364	0.65736	1.24147													1.06661	1.29204
	0.815911	0.895047	1.25694													1.25939	1.06998
	0.754714	0.63759	0.662507													1.00006	1.4013
	0.977214	1.49886	0.676935													1.02646	0.903355
	0.85291	1.01719	1.06034													0.672924	1.85725
	0.637372	0.918966	0.520887													0.855669	0.56194
	1.27199	0.777828	0.814775													1.61229	0.779704
	1.19611	0.808627	1.36543													1.95712	1.27549
	1.37487	1.01827	0.934847													0.85171	0.676195
	0.861227	0.825176	0.809583													0.917783	1.91243
	0.759101	0.70444	1.2828													1.35048	1.22557
	1.00436	1.00066	1.01139													1.1171	0.525519
	0.649271	0.821393	0.918848													0.462058	0.82459
	0.824557	0.733919	0.5283													1.06084	1.33286
	1.29555	1.06185	1.12769													1.44522	1.0209
	0.618839	0.679655	1.25908													0.875669	0.8322
	1.21793	1.43945	1.4823													0.940882	1.34621
	1.27071	0.602354	0.831539													0.835676	0.914556
	1.0798	1.08877	0.731619													1.08187	0.736276
	1.11156	1.02895	0.691896													1.5829	1.01883
	1.14683	0.806435	0.728388													1.55391	0.613726
	0.631397	1.23792	0.769749													0.96268	0.958561
	0.924513	1.01929	0.807905													0.704449	1.02594
	1.18372	0.623944	0.648751													1.04999	0.872692
	1.17863	0.605914	0.995193													1.387	0.785189
	1.0125	1.21278	0.840266													0.833893	0.504744
	0.907188	0.970569	1.07436													0.462151	0.720905
	1.05096	1.61829	0.60354													1.02289	1.19493
	0.996614	0.916832	0.876298													0.497773	0.886103
	1.3085	0.785764	0.996581													1.1655	0.968347
	0.838316	0.936805	0.676994													0.67927	0.465477
	0.960451	1.13815	1.48887													1.48948	0.980943
	0.820939	1.17838	1.06467													0.995095	0.756445
	0.69573	1.12665	0.710246													0.90778	1.20662
	0.945674	0.909549	0.682839													0.877232	1.02064
	0.941361	1.06075	0.650904													0.949392	0.749435
	0.999798	0.825023	0.55048													0.827665	0.595113
	1.27877	1.14217	0.816746													1.04541	0.818982
	0.879009	0.753638	0.850561													0.550941	1.69054
	0.766513	1.46744	0.984547													0.875437	0.981677
	0.700566	0.965402	1.04044													1.33532	1.29769
	1.14879	0.562536	0.660444													0.768785	0.613243
	0.404068	0.717013	0.881779													1.12681	0.675346
	1.389	0.926863	0.825836													1.20971	0.918615
	1.44743	1.37735	0.899031													1.18982	1.34365
	1.05753	0.541283	1.058													1.4178	0.698326
	0.727037	0.638075	0.776052													2.04443	0.969647
	1.01428	0.87492	0.722459													0.737965	1.11704
	1.14779	1.18107	0.75032													0.737359	0.883236
	0.720928	0.880132	1.17552													0.897867	0.490032
	0.619393	1.40794	0.938085													0.578734	0.827922
	1.20181	0.867741														0.684976	0.813878
	0.812593	1.01691														1.20505	0.555627
	0.636805	1.17928														1.24813	0.673128
	0.818269	1.08943														1.16043	1.03263
	0.867872	0.830023														0.580241	0.787953
	0.942322	1.13595														0.382097	0.773483
	1.23995	0.819486														1.26785	1.17958
	0.791287	1.25664														1.32281	0.883379
	1.18278	0.735764														0.852694	0.688074
	0.884835	0.979361														1.48154	1.3185
	0.787401	0.897488														1.56368	0.839571
	0.649074	0.794036														1.01323	0.660143
	0.788091	0.801557														0.976935	0.893241
	1.4155	0.67194														1.01059	0.649583
	0.748191	0.980377														0.845826	1.40165
	1.08798	0.911785														1.05841	0.687671
	1.69828	1.08305														1.30351	0.637225
	0.732174	1.08683														1.43404	0.599003
	0.912221	0.812814														0.850514	0.832228
	0.612581	0.720468														0.808142	0.817263
	0.959092	1.009														1.0944	0.526443
	1.26713	1.74371														0.627809	0.759053
	1.23184	0.561434														0.564666	0.879841
	0.908776	0.841887														1.44192	0.652977
	0.878456	1.39498														0.78859	1.03985
	0.894715	0.916683														0.644891	0.634822
	0.880241	1.07069														1.02787	0.858728
	0.920061	0.79872														2.16639	0.774258
	0.730283	0.814519														1.30754	0.710643
	1.20916	0.836425														1.0444	1.1934
	0.941507	0.999108														0.968417	1.07079
	1.29396	0.510728														0.978951	1.29086
	0.529325	1.01651														1.0216	0.816626
	1.14602	0.692075														0.895073	0.985858
	0.81151	0.957265														1.03271	0.747146
	0.863673	0.694796														1.09148	1.02506
	0.707362	0.972579														0.825063	0.455484
	0.888496	1.10743														1.31163	0.706845
	0.753511	1.20631														1.66728	0.619607
	1.14193	1.00466														0.9935	1.75115
	0.953754	1.07969														0.759502	0.794648
	1.03419	1.0766														0.987977	0.769638
	0.393704	1.18917														0.813977	0.943451
	0.709269	0.83351														1.36336	0.778961
	0.952305	0.716215														1.07074	0.745661
	0.616577	1.20648														0.714648	1.73875
	1.10973	0.877637														0.696448	0.685899
	0.77135	1.03468														1.34737
	0.810317	1.01495														0.856558
	0.774779	0.716785														1.1989
	1.40192	0.704977														0.64257
	0.986336	0.794945														1.01471
	0.91565	0.844037														0.661205
	0.828521	0.635585														1.00403
	0.958791	1.1757														1.62007
	0.842677	0.671388														0.925181
	1.34313	0.759084														1.01313
	0.735297	0.919129														1.18205
	1.40435	0.497481														0.410069
	1.00647	0.788987														0.640987
	0.671746	1.10796														0.659063
	0.94834	1.0374														0.934196
	1.4637	1.37251														0.554079
	0.769385	1.21055														0.912657
	1.05192	1.45304														0.997042
	0.708775	0.979391														0.967769
	0.984985	0.622139														1.16308
	1.08031	0.87941														1.05281
	1.08415	1.12091														0.676603
	0.786888	0.662643														1.02022
	1.00964	1.00781														1.07739
	1.13329	0.954944														0.910409
	1.13182	1.11208														0.968053
	0.87192	0.998408														1.09074
	1.02182	0.560593														1.24737
	1.37811	0.572727														0.74919
	0.921274	0.858399														0.890251
	0.638697	0.505927														0.879482
	1.11726	0.744745														1.18119
	0.57362	0.773585														0.786374
	0.98216	1.23083														1.09062
	0.818966	0.76532														0.883872
	0.910529	0.866927														1.2487
	0.93296	0.726198														0.799281
	0.591446	0.982747														0.722608
	1.26175	0.715223														1.17376
	0.787675	0.854179														0.833604
	0.579166	1.06952														0.932356
	1.02728	0.858949														0.739226
	1.06775	1.16538														0.915681
	1.05069	0.700657														0.794302
	0.95796	0.717855														0.869749
	1.00482	0.750586														0.96186
	0.917701	0.89718														0.418176
	0.948311	0.9008														0.988332
	1.06757	0.969941														0.639891
	1.31042	0.918502														1.01757
	0.872618	1.17962														1.05256
	0.720266	0.706883														1.1672
	1.19428	1.06028														0.824738
	1.60064	0.602625														0.733021
	1.28234	1.08582														0.754854
	1.2525	0.779084														0.997216
	0.638744	1.02575														1.51487
	1.43868	1.01049														0.626497
	0.910431	1.30404														1.05229
	0.869819	0.789978														0.665792
	0.772973	1.06793														1.02944
	0.863717	0.677681														0.67103
	1.26632	0.633266														0.757615
	0.665331	1.04175														1.56855
	0.759551	0.776415														1.20583
	1.05511	0.666409														1.23711
	0.924655	1.08897														1.54298
	0.850582	0.791311														1.37869
	0.500885	0.701521														0.710382
	1.27687	0.693102														1.27701
	1.59629	0.83054														0.694718
	0.546915	0.699938														0.638667
	0.603938	1.34062														1.57237
	0.603184	0.886209														1.30932
	0.879047	0.603921														0.905968
	0.808632	0.884717														1.19134
	0.955006	0.900547														1.07379
	1.56075	0.920166														0.77396
	0.773204	0.973183														1.23251
	0.718557	1.09784														1.40057
	0.544038	1.16176														1.55187
	0.955587	0.851268														0.673266
	0.63217	0.987805														1.01272
	0.941972	0.984658														1.3103
	0.76739	0.756344														1.04159
	1.02053	1.18083														0.798317
	1.02997	0.462398														0.63705
	1.00264	1.09868														1.03676
	1.06598	1.0588														1.30802
	1.08909	0.620835														1.1681
	1.30168	0.875858														1.05451
	0.791166	1.03681														1.36745
	0.969644	0.978568														1.0285
	1.08891	0.886216														1.41236
	0.900099	0.787952														1.3764
	0.869383	0.839526														1.09338
	1.63099	0.954137														0.595246
	0.829413	0.814791														2.09735
	1.42623	0.881215														0.955103
	0.272281	0.760617														0.657477
	1.25992	1.02708														0.803019
	0.820526	0.938432														1.24279
	1.35613	0.776335														1.39128
	0.937169	0.716563														1.13682
	0.948083	1.19699														0.949142
	0.700398	0.628814														0.553439
	0.889458	0.815146														0.877339
	0.93314	0.811163														0.994958
	0.813058	0.821244														0.413446
	0.923446	0.792101														1.27756
	1.27114	1.08226														0.864438
	1.13921	0.797075														1.67918
	0.446173	0.86434														0.961041
	1.07619	0.411375														1.04643
	0.780729	0.824072														1.02867
	0.627118	0.95741														0.97769
	0.954793	0.774738														0.740011
	0.730594	0.996651														0.537297
	0.620568	1.098														1.61354
	0.710695	0.921795														0.850267
	0.724003	1.07235														1.20226
	0.829599	0.901331														1.07966
	0.770113	1.08684														1.65619
	1.37819	1.19056														0.584555
	1.13669	0.718118														1.2623
	1.27353	0.941636														1.17984
	1.05561	0.788831														0.946795
	1.41569	1.01535														1.08383
	1.27343	1.1899														0.851574
	1.32645	1.04556														0.602823
	1.0214	0.770902														1.05283
	0.611809	0.630282														1.03114
	0.831421	0.883215														0.626918
	1.68465	0.912891														1.4222
	1.43352	1.02426														0.834296
	0.559516	1.01663														1.20007
	1.01819	0.850837														0.676236
	0.956477	0.902565														0.842639
	0.651407	0.371907														1.00364
	0.690481	0.756329														1.15378
	0.694358	0.635054														1.45739
	0.460307	0.982085														0.627987
	1.30242	1.09652														0.818769
	0.94786	0.65452														0.802288
	1.30756	1.06199														1.05629
	0.972202	0.712761														0.741774
	0.899749	0.944678														1.00864
	0.919026	0.925252														0.627046
	0.736707	0.993936														0.581469
	1.74759	0.612433														1.07015
	0.779864	0.686584														0.925377
	0.881051	1.15255														1.00219
	1.10774	0.553553														0.486724
	1.52482	0.857339														0.733807
	0.989407	0.523095														0.938976
	0.84405	0.989738														0.527726
	0.760522	0.63192														1.22848
	1.17736	0.762209														1.23976
	0.858994	0.692579														0.75067
	0.671851	0.749456														0.79105
	1.084	0.884218														0.930868
	0.686359	0.767732														0.733168
	1.38405	1.01347														0.890812
	0.966779	0.870854														1.1002
	1.2921	0.39172														0.854787
	0.667443	0.857288														1.07736
	1.02138	0.985361														0.832154
	1.74934	0.564931														1.21145
	0.734173	0.774795														0.731334
	0.753201	0.620277														0.675921
	1.03278	0.695686														0.908613
	1.02036	0.764181														0.880937
	1.3919	0.830893														0.788734
	1.12282	1.05715														0.963087
	0.898187	1.02804														1.27426
	1.34715	0.710696														0.835534
	0.568656	0.817514														1.36228
	1.06266	0.728961														0.95459
	0.907902	1.02693														1.31277
	1.31653	1.53354														1.64238
	0.954828	1.00669														1.29352
	0.950458	0.748224														1.21142
	1.22941	1.62733														0.855407
	0.888486	1.2043														0.95207
	1.19799	0.520267														0.703621
	1.05264	0.546064														0.883451
	1.10031	1.09573														0.626901
	0.786827	0.930346														0.503274
	0.813911	1.16626														0.623261
	0.536421	0.641845														0.739729
	0.947209	1.32592														1.12741
	0.981515	0.661578														0.855803
	0.812246	0.438675														1.18975
	0.922888	0.781525														1.05452
	1.04075	0.754388														1.14314
	0.590838	0.887099														1.19795
	1.28902	0.976986														1.28347
	0.723728	1.04702														0.841761
	1.10969	0.762961														1.76181
	0.92745	0.662487														0.686065
	1.00413	1.01667														1.60442
	0.875818	1.41375														1.30202
	0.882657	1.31962														0.654313
	1.03854	0.919412														0.876398
	1.0875	0.774913														0.999156
	1.42172	0.760474														1.09758
	0.821677	1.04368														1.72006
	0.99477	0.640885														0.819685
	1.07736	0.704255														1.25825
	1.08733	1.16527														1.2105
	0.878081	0.981436														0.860892
	1.08085	1.2153														0.660455
	0.811832	1.09949														0.591485
	1.03209	0.550144														0.859812
	1.01514	0.713214														0.943833
	0.98414	0.987118														1.18835
	0.793635	0.849847														0.393127
	0.722904	0.617114														2.19877
	0.980369	0.888966														1.11771
	0.906542	1.13199														1.08957
	1.5068	1.13178														0.913441
	0.912095	1.49223														0.982235
	0.649485	1.30595														1.16543
	0.875721	0.986785														1.41497
	1.11149	0.884842														0.965205
	0.766529	0.447576														0.959341
	1.07374	1.10962														0.899649
	0.727014	0.806755														0.754494
	0.662483	0.666297														0.955214
	1.01668	0.96568														1.24581
	1.08909	0.997513														0.847664
	0.704758	1.24206														0.940776
	1.31406	0.971478														0.938242
	0.694101	0.902656														0.949489
	0.699429	0.864483														1.30369
	1.06736	0.72471														0.667135
	0.613292	0.721982														0.680267
	0.686269	0.801511														1.13253
	0.616832	0.893093														1.08691
	1.18411	1.15825														0.524471
	1.03992															1.02517
	1.13422															1.29477
	0.345828															1.1694
	0.55668															1.00747
	0.952902															0.971166
	0.750678															1.18522
	0.684622															0.461374
	1.21078															1.18741
	0.623901															1.59498
	1.24899															1.12901
	0.793778															0.952187
	0.970905															0.695995
	0.907009															0.963829
	0.989082															0.846977
	0.748586															1.41092
	1.00982															0.884529
	1.1124															0.875831
	1.48324															0.982825
	0.782509															0.810805
	0.583454															0.966949
	0.706393															0.902338
	0.719959															0.289034
	1.0095															1.016
	1.04618															1.02178
	1.24037															0.643899
	0.627224															0.74785
	0.949121															0.974915
	0.815211															1.91459
	0.780707															0.755978
	0.693732															0.846382
	0.620502															1.20082
	1.27278															0.729541
	1.08834															1.24034
	1.64284															1.23486
	0.942247															0.986741
	0.84042															1.04025
	1.35382															0.872081
	1.0335															1.05936
	1.00677															1.02142
	0.818892															0.68724
	0.908621															0.712425
	0.749708															0.88578
	1.15835															1.28227
	0.978981															1.7769
	0.85753															1.02398
	0.778236															1.02067
	0.736093															1.16024
	0.976879															1.55724
	0.625046															0.748248
	1.15939															0.855454
	0.623847															1.25267
	0.621166															0.748755
	0.844909															0.736934
	1.15091															0.804376
	0.757283															0.926198
	0.978508															1.49677
	0.442645															1.16227
	0.77198															0.718498
	0.957222															0.805164
	0.744613															0.607608
	0.768237															0.389048
	0.861693															0.785867
	0.886036															0.950994
	0.775445															0.595038
	0.793095															0.66556
	0.798135															0.814945
	0.930526															0.791246
	1.18028															1.44899
	1.06752															0.99361
	1.02179															1.11322
	0.918034															1.37971
	0.774272															1.12529
	0.922421															0.819086
	0.825725															0.895605
	0.878672															1.57262
	0.637673															0.874189
	0.697346															0.723177
	1.18348															2.02701
	1.59102															0.610475
	0.741416															0.675353
	1.25992															0.80822
	0.550046															0.919452
	1.21715															0.767367
	1.30386															0.779174
	0.788568															0.592097
	0.976063															0.873614
	1.02443															0.69815
	1.4011															0.618051
	0.594409															0.425971
	1.31622															0.36323
	0.649528															0.902604
	0.898472															0.751467
	0.687644															0.743825
	0.975824															1.17203
	0.886477															0.408656
	0.639772															0.959219
	1.03288															0.665272
	0.817322															1.05483
	0.962341															0.631924
	0.850948															0.840277
	1.54611															0.891539
	1.17873															0.943686
	1.2946															1.32459
	0.982578															1.65069
	0.81202															0.6934
	0.81463															0.655862
	1.12492															0.809349
	1.32419															1.24229
	0.907169															0.903025
	0.833684															0.6971
	0.773287															1.09065
	1.14905															0.776304
	0.713965															0.581823
	0.768515															0.504963
	0.774898															0.665862
	0.866181															0.502892
	0.70529															0.94446
	0.853342															1.92321
	1.63678															0.732517
	0.883702															0.769327
	0.818909															0.702968
	1.18854															1.39495
	1.36238															1.02819
	0.787967															0.687659
	1.15738															1.05454
	1.24967															1.09356
	0.563491															0.896246
	1.12753															0.602678
	0.485352															1.9029
	0.90843															0.709659
	0.861687															1.20377
	0.818949															0.609772
	1.14637															0.506293
	1.1129															1.17487
	0.921923															1.29813
	1.00398															0.721044
	0.80618															1.73024
	0.823795															0.843979
	0.894807															1.20102
	0.666213															1.01247
	0.701412															1.04545
	1.11852															1.25811
	1.13841															1.50509
	0.752358															1.80318
	0.803493															0.986988
	0.838565															0.788358
	1.06294															0.640911
	0.898353															0.704301
	0.593318															0.54892
	1.14644															1.11082
	0.981006															0.871283
	0.862115															1.22701
	0.724492															1.50207
	0.606495															1.16993
	1.57861															0.942245
	0.82555															0.728709
	1.31453															0.781976
	0.845155															0.698079
	1.03755															1.00601
	0.818467															0.795708
	0.895987															1.0483
	1.05342															0.844029
	0.649239															0.824474
	0.561617															1.20131
	0.770808															1.27864
	1.04934															0.846231
	0.989828															1.49999
	1.03656															0.962871
	0.865274															0.65262
	1.15009															0.772932
	1.38329															0.655879
	1.09014															1.24459
	0.486521															0.953522
	1.13662															1.29066
	0.880004															0.939842
	1.3647															0.851063
	1.45833															0.826838
	0.827147															1.52239
	0.829295															0.954994
	1.55216															1.42131
	0.86115															0.918687
	0.916411															0.580201
	1.16482															0.508058
	0.798698															0.588968
	0.714163															0.51353
	1.1067															0.627609
	0.991662															0.63219
	1.53025															0.713444
	0.846021															0.987289
	0.859881															0.826702
	0.785307															0.943305
	0.905962															0.83916
	0.543647															1.07863
	0.76319															0.808721
	0.607608															1.43291
	0.818165															1.19518
	1.21095															1.18744
	0.818332															0.991812
	0.93511															0.898667
	0.923964															0.878498
	1.30628															0.914425
	1.18222															0.714667
	1.15035															1.32136
	1.32553															1.85209
	1.29342															0.649459
	1.01735															1.03968
	0.559198															0.962342
	0.83176															0.671031
	0.698101															0.97887
	1.29996															0.510914
	0.332077															0.742595
	0.880794															0.603219
	1.00973															0.80519
	0.840995															0.623871
	1.2475															0.589786
	1.11098															0.852872
	0.775662															0.860166
	0.469195															1.00344
	1.04255															1.17713
	1.03511															0.812517
	0.97835															0.935643
	1.377															1.80432
	1.57604															1.2434
	1.29391															0.768673
	1.19798															1.40463
	1.51106															0.878234
	0.87056															0.982317
	0.857569															0.578951
	0.833486															1.21348
	0.93032															1.09706
	0.954112															0.934245
	0.660578															0.843762
	0.918388															0.721089
	1.12988															0.903171
	1.23962															1.1662
	0.739882															1.055
	0.840089															1.4283
	0.896019															1.06148
	0.973724															0.683149
	1.25205															0.547763
	1.97021															0.904927
	0.832901															0.668515
	0.911944															1.30814
	0.512656															0.672778
	0.930252															1.10141
	0.915622															0.634349
	0.512516															0.769881
	0.982348															0.787276
	1.33458															1.38559
	0.964744															0.840695
	1.09924															1.1428
	0.859639															0.758228
	1.4688															0.884874
	0.600227															1.01525
	1.13128															0.475307
	1.42061															1.20448
	1.07693															0.926731
	0.769505															1.03713
	1.14794															0.696313
	0.612637															0.733329
	0.93716															0.670659
	1.00912															1.64005
	0.961043															2.15264
	0.954403															1.40018
	0.57767															1.51988
	0.584078															1.46394
	0.666727															1.32108
	0.910932															0.608496
	1.50623															0.577399
	1.4347															0.951854
	1.10784															0.850396
	0.458726															1.60861
	0.731034															1.09495
	0.689669															1.20025
	0.721637															1.03478
	0.813111															1.24643
	0.73333															0.841811
	0.820867															0.894314
	1.09331															1.0446
	0.752325															0.943978
	0.847622															0.55272
	0.807973															1.23478
	1.0311															1.20082
	1.07352															0.660062
	1.06692															0.598945
	1.2262															1.35522
	0.726074															0.842381
	1.44817															0.643206
	1.21707															0.621011
	1.00594															1.11642
	1.15261															1.0078
	1.32137															1.05384
	0.774245															1.1307
	1.13245															0.95058
	0.446701															0.945378
	1.02359															0.658932
	0.811621															1.47416
	1.52873															1.09874
	0.94621															1.45413
	0.719006															0.753947
	0.574413															0.723753
	1.00379															0.999251
	1.24822															0.513935
	1.06654															1.62872
	1.12495															1.06165
	1.25327															1.39172
	0.347246															0.910694
	0.916136															0.810193
	0.783943															1.12046
	0.840551															1.1088
	1.16114															0.823611
	1.03619															0.762672
	0.979449															0.807256
	1.20842															0.654759
	0.878411															0.797588
	0.943697															1.14035
	0.904311															0.898685
	0.976196															0.525805
	0.968704															0.826306
	0.749727															0.83641
	0.744689															1.0794
	0.930274															1.13917
	0.937128															1.28425
	1.03503															1.39325
	1.10001															0.893115
	1.51024															0.730188
	0.993203															0.939773
	0.921275															0.742345
	0.575517															0.585496
	1.19858															1.15743
	1.12148															0.684517
	1.3266															1.00868
	1.31883															1.33443
	0.855634															1.20454
	0.903176
	0.950001
	0.990954
	1.03941
	0.943955
	1.80591
	0.979762
	1.18877
	0.693913
	0.848931
	0.638215
	0.875138
	0.856445
	0.529049
	1.13155
	0.938313
	0.684261
	0.589222
	0.722354
	1.08113
	1.24407
	1.21051
	1.09037
	0.689883
	0.998105
	1.19877
	1.22142
	1.10168
	0.735043
	0.989625
	0.986438
	0.872502
	0.72542
	1.02946
	1.03373
	1.04496
	0.622928
	0.828486
	1.40372
	1.12326
	0.959537
	1.21982
	1.06667
	0.51919
	1.07687
	1.36142
	0.78205
	1.03269
	1.02219
	0.906968
	1.46657
	0.943172
	0.997567
	0.558126
	0.834692
	1.28762
	0.432425
	1.07538
	0.565652
	0.952066
	0.507023
	1.35893
	0.987112
	1.24264
	0.790372
	0.805956
	0.779459
	1.06196
	0.843652
	1.03343
	0.949864
	1.30715
	1.27254
	0.92208
	1.00319
	1.05417
	1.26076
	1.53662
	0.839274
	1.13142
	0.781771
	1.2435
	0.653664
	1.01242
	0.916755
	0.842854
	1.13677
	1.22588
	0.801718
	0.905876
	1.05998
	0.95527
	0.618526
	0.941018
	0.880868
	0.503364
	1.90167
	1.44611
	1.12693
	1.25663
	0.893965
	0.952357
	0.97683
	1.19088
	1.01593
	1.08008
	0.689493
	1.33256
	0.643588
	0.953723
	1.14114
	0.955966
	1.2571
	1.53899
	0.949634
	0.937599
	0.767223
	1.00824
	1.24419
	0.769438
	1.36047
	1.36206
	0.4598
	1.16022
	1.11937
	0.973988
	0.78728
	0.800668
	0.724666
	0.8545
	0.951579
	0.993877
	1.60473
	0.902633
	1.00147
	0.687168
	1.06426
	1.61223
	0.902133
	0.715107
	1.00857
	0.548594
	1.17926
	0.582058
	0.81762
	0.831388
	1.76903
	1.15273
	0.771517
	0.487023
	1.19254
	0.966782
	0.997926
	0.421358
	1.38173
	1.33819
	0.767159
	1.92255
	0.905114
	1.05068
	1.03135
	1.53904
	0.906815
	0.783665
	0.95719
	1.0411
	1.0482
	0.943087
	0.84919
	0.795643
	0.989312
	0.848748
	0.741589
	1.11681
	0.706379
	0.711811
	1.17815
	1.02563
	1.16168
	0.67692
	0.955914
	0.824835
	0.897009
	0.898979
	0.914134
	0.97365
	0.778389
	0.978124
	0.752249
	0.823782
	1.13978
	0.563434
	1.29103
	1.47727
	0.948612
	1.00257
	0.686665
	1.11603
	1.09348
	1.20413
	0.807574
	1.17103
	0.565441
	1.51584
	0.787681
	0.721501
	1.07529
	0.94047
	1.07029
	0.940321
	0.943235
	0.833249
	0.604098
	0.87495
	1.12082
	0.940446
	1.17624
	1.0787
	0.791154
	1.02542
	1.13934
	0.979476
	1.01965
	1.03283
	0.968977
	1.1877
	0.894923
	1.1588
	0.881876
	0.723586
	1.38224
	0.941756
	0.671072
	1.17187
	0.880678
	0.758969
	0.842161
	1.03042
	0.786336
	0.669479
	0.860217
	0.860216
	0.899847
	1.43153
	0.707808
	1.77892
	0.684777
	1.43503
	1.05706
	1.14279
	1.1737
	1.15878
	0.899567
	0.883244
	1.0223
	1.16207
	1.31868
	0.611432
	1.0023
	1.30932
	0.962594
	0.761536
	0.804148
	1.44394
	0.712902
	1.44434
	0.963999
	0.78557
	1.55812
	1.00269
	1.50023
	1.18963
	1.38712
	1.16642
	1.09077
	1.29422
	1.00634
	0.903755
	0.682007
	1.79692
	1.11073
	0.575328
	1.309
	1.03023
	1.15111
	0.760814
	0.814689
	0.873933
	0.944673
	1.02715
	0.984206
	1.04366
	1.03976
	1.75421
	0.85165
	1.2088
	0.57769
	0.916202
	0.796929
	1.05841
	1.35272
	1.61207
	1.07101
	1.02675
	1.09057
	1.38759
	0.790155
	0.782798
	0.450993
	1.37247
	0.836013
	0.617905
	0.626696
	0.747295
	0.94237
	0.971945
	0.840556
	0.543509
	0.823058
	0.778434
	0.733281
	1.4593
	0.597133
	0.750096
	1.20566
	1.63554
	0.988062
	0.914827
	1.10557
	0.79319
	0.743059
	0.868652
	0.561158
	0.981739
	1.51618
	1.31427
	0.963785
	0.859247
	0.979392
	0.592604
	0.873512
	1.02713
	0.580117
	1.24005
	0.776166
	0.908067
	1.10842
	1.11604
	1.34209
	1.45939
	1.31166
	0.454912
	1.07062
	1.09345
	0.992506
	1.16897
	0.798777
	0.964647
	0.625746
	0.931997
	0.930206
	0.806625
[truncated: 1,225 more rows]
