# Supplementary material for: Compartmentalized oskar degradation in the germ plasm safeguards germline development
Source: eLife journal article supplement (doi:10.7554/elife.49988), 2020-01-07
Supplement: supp [file elife-49988-supp-v1.zip › elife_poa_e49988_Figure_2_source_data_2.xlsx]

## Sheet: Sheet1
Figure 2C
		Linearity
		Germ Granules							Germ Granules								Founder Granuels							Founder Granuels
		Before 1	Before 2	Before 3	During 1	During 2	During 3			Before 1	Before 2	Before 3	During 1	During 2	During 3		Before 1	Before 2	Before 3	During 1	During 2	During 3			Before 1	Before 2	Before 3	During 1	During 2	During 3
		0.543588	0.267172	0.441371	0.434108	0.580888	0.893649		Avg	0.423104	0.373874	0.399141	0.477944	0.460288	0.482821		0.402155	0.248292	0.475591	0.229164	0.248714	0.134002		Avg	0.431381	0.394496	0.39712	0.385124	0.388909	0.355171
		0.252292	0.142012	0.733411	0.297993	0.615914	0.289797		StDev	0.23631	0.213145	0.222366	0.252424	0.241796	0.245086		0.337486	0.820337	0.382877	0.0721173	0.0521459	0.194304		StDev	0.245542	0.241579	0.229424	0.221044	0.225268	0.21533
		0.57919	0.74503	0.115338	0.140847	0.249898	0.218811										0.423292	0.250696	0.234375	0.925651	0.530878	0.0639415
		0.8943	0.0299618	0.273291	0.619143	0.180996	0.516297			Before	During						0.212577	0.662287	0.339311	0.453623	0.569531	0.259241			Before	During
		0.694991	0.0741502	0.772819	0.166409	0.578831	0.946746		Avg	0.398706	0.473684						0.0430155	0.620706	0.418377	0.341761	0.106556	0.204795		Avg	0.407666	0.376401
		0.236433	0.510583	0.38647	0.354493	0.756222	0.89048		SEM	0.0142131	0.00684473						0.843876	0.151464	0.889391	0.432011	0.363471	0.442911		SEM	0.0118817	0.0106711
		0.557074	0.0757355	0.206868	0.324819	0.95325	0.712026										0.00465535	0.172175	0.377851	0.441172	0.257027	0.391759
		0.426424	0.56702	0.485649	1	0.566412	0.555937										0.133404	0.00545238	0.732304	0.758519	0.363855	0.266146
		0.563556	0.576298	0.548908	0.349998	0.643913	0.816469										0.462202	0.0475884	0.311428	0.102653	0.0331433	0.0984127						Germ vs Founder Ttest
		0.0215588	0.523869	0.259083	1	0.924731	0.858										0.439436	0.716614	0.502291	0.30173	0.228437	0.827379						Before	During
		0.462945	0.0296353	0.201396	0.396293	0.786346	0.83464										0.331269	0.0358734	0.420431	0.479182	0.614429	0.289428					p-value	0.653939	0.00155066
		0.202167	0.16535	0.476111	0.587218	0.270304	0.526089										0.572295	0.85025	0.369521	0.177061	0.383328	0.362796						n.s.	**
		0.423505	0.323037	0.509947	0.640579	0.332321	0.697152										0.801422	0.199171	0.260641	0.538781	0.529848	0.34923
		0.570438	0.722639	0.572232	0.207039	0.284774	0.485461										0.772155	0.274377	0.244131	0.0631394	0.201497	0.343251
		0.392814	0.1086	0.568595	0.934648	0.667927	0.324882										0.939125	0.0353238	0.186929	0.44663	0.19535	0.220591
		0.34265	0.747145	0.175188	0.0203628	0.16029	0.239778										0.344612	0.672364	0.803506	0.314501	0.488319	0.0852094
		0.808636	0.406185	0.785861	0.037585	0.316415	0.349503										0.887195	0.670395	0.311078	0.182846	0.509501	0.389295
		0.401575	0.265946	0.224691	0.375924	0.242343	0.298832										0.509873	0.25476	0.703993	0.555719	0.690177	0.729383
		0.510244	0.0913852	0.795492	0.604315	0.386457	0.843345										0.696508	0.326143	0.359301	0.706374	0.135845	0.00785204
		0.881135	0.311412	0.220724	0.0251905	0.146017	0.273019										0.529315	0.283813	0.895094	0.886652	0.68322	0.0985044
		0.884863	0.460558	0.386434	0.810296	0.791417	0.184267										0.634466	0.738914	0.363481	0.314018	0.413146	0.303774
		0.214692	0.410181	0.165264	1	0.0509281	0.535068										0.36739	0.452437	0.584908	0.576351	0.674963	0.354155
		0.0362152	0.00828278	0.608492	0.96254	0.750151	0.758345										0.335754	0.209126	0.599497	0.532174	0.230867	0.476066
		0.860139	0.220643	0.594033	0.334676	0.567277	0.22392										0.214863	0.420397	0.28196	0.379151	0.439258	0.185403
		0.253785	0.319568	0.28602	0.667462	0.462496	0.661315										0.529715	0.82793	0.265166	0.183943	0.376822	0.168301
		0.331688	0.280379	0.285232	0.610906	0.74004	0.79768										0.355751	0.345046	0.652587	0.276611	0.530755	0.336277
		0.100233	0.246389	0.461261	0.223414	0.177811	0.289539										0.520377	0.741915	0.757498	0.264869	0.266253	0.757611
		0.168192	0.546111	0.390486	0.257326	0.529286	0.294466										0.312548	0.126671	0.515609	0.69957	0.00880573	0.584467
		0.345532	0.13754	0.534377	0.307985	0.988839	0.264325										0.316666	0.196806	0.154714	0.507382	0.195895	0.418044
		0.468908	0.842753	0.71441	0.172886	0.638858	0.526381										0.260167	0.591535	0.102619	0.219488	0.0122728	0.0756111
		0.0700231	0.266774	0.813874	0.13792	0.182733	0.964747										0.85494	0.30969	0.208892	0.145199	0.139326	0.0709263
		0.340629	0.847056	0.271389	0.140977	0.299229	0.25026										0.361295	0.17392	0.561894	0.378626	0.180764	0.259204
		0.160739	0.220085	0.380471	0.487511	0.402106	0.207544										0.268887	0.673664	0.581816	0.429358	0.2208	0.511553
		0.176891	0.492032	0.677083	0.508603	0.57572	0.570559										0.648019	0.435424	0.767502	0.154121	0.213379	0.0364661
		0.20169	0.399972	0.255161	0.193625	0.197243	0.691386										0.535235	0.168648	0.0999883	0.721187	0.81996	0.195504
		0.301512	0.418236	0.578218	0.57229	0.317858	0.142002										0.285989	0.39227	0.390911	0.384052	0.555388	0.6528
		0.375075	0.64526	0.650031	0.521712	0.373982	0.795765										0.872653	0.934795	0.517044	0.792867	0.393987	0.279604
		0.377612	0.653891	0.321208	1	0.261635	0.257891										0.949768	0.162936	0.151622	0.773003	0.817662	0.157441
		0.793603	0.204204	0.502295	0.512352	0.530761	0.0427359										0.802603	0.849021	0.0427041	0.253064	0.04793	0.484169
		0.259472	0.428001	0.161832	0.742707	0.689943	0.661196										0.396398	0.347738	0.146513	0.534062	0.193864	0.318208
		0.631668	0.403412	0.316737	0.215818	0.324444	0.854256										0.16586	0.843492	0.943657	0.574267	0.328007	0.0801817
		0.248388	0.10695	0.291581	0.252503	0.406064	0.735805										0.377136	0.165251	0.242036	0.321306	0.23855	0.245084
		0.95214	0.151908	0.10473	0.983983	0.690788	0.619241										0.518135	0.919601	0.646456	0.333097	0.0476253	0.839378
		0.338098	0.00208397	0.273733	0.528057	0.461724	0.261614										0.713179	0.0246696	0.124861	0.4303	0.0608522	0.314556
		0.087657	0.564321	0.639777	0.372212	0.517145	0.2459										0.575603	0.301633	0.867925	0.772248	0.344122	0.636659
		0.401556	0.514899	0.530031	0.701925	0.471266	0.77906										0.122416	0.456013	0.217828	0.662782	0.392611	0.54032
		0.0299991	0.127882	0.491999	0.287288	0.716473	0.74289										0.393349	0.0652452	0.34176	0.679783	0.470214	0.440778
		0.187517	0.416741	0.523068	0.234428	0.27259	0.500647										0.272259	0.108168	0.0107952	0.288889	0.172985	0.367253
		0.482192	0.648346	0.174343	0.148086	0.422491	0.289244										0.804168	0.700796	0.265305	0.525967	0.200803	0.614286
		0.644063	0.22216	0.275856	0.238465	0.426037	0.54441										0.256052	0.676083	0.511461	0.0238498	0.469079	0.264383
		0.203729	0.22497	0.58326	0.604431	0.777004	0.920814										0.409834	0.553195	0.557795	0.86647	0.599448	0.549796
		0.301191	0.2016	0.258213	0.833236	0.214487	0.624089										0.269708	0.574606	0.0914554	0.219872	0.239491	0.0229975
		0.300266	0.278402	0.48356	0.545637	0.520287	0.455457										0.683059	0.920391	0.231277	0.326405	0.534923	0.00923447
		0.523587	0.619877	0.320478	0.606855	0.360999	0.981511										0.318037	0.330987	0.688397	0.324327	0.609154	0.0304097
		0.707902	0.77918	0.318162	0.335272	0.50016	0.12737										0.181327	0.934741	0.0874669	0.338233	0.0190758	0.636978
		0.568213	0.246335	0.540066	1	0.37363	0.328476										0.301471	0.0449875	0.621619	0.47025	0.121411	0.38831
		0.272867	0.204627	0.554498	0.289049	0.513803	0.18625										0.3325	0.42847	0.230125	0.232496	0.334653	0.292454
		0.378623	0.199856	0.749221	0.232989	0.423399	0.652516										0.853056	0.801611	0.360401	0.179274	0.0643498	0.274943
		0.523684	0.793865	0.158715	0.531978	0.619817	0.640657										0.17365	0.169144	0.13658	0.676788	0.662711	0.179974
		0.080952	0.484028	0.589418	0.595432	0.390274	0.592669										0.711766	0.251857	0.598845	0.585772	0.205558	0.172808
		0.0459191	0.736311	0.167209	0.832941	0.263272	0.437465										0.619184	0.397279	0.377996	0.0712121	0.887883	0.0957854
		0.239415	0.0181044	0.657999	0.231117	0.636129	0.29121										0.783701	0.390712	0.440695	0.956382	0.69785	0.0406827
		0.248828	0.0290741	0.333955	0.524542	0.71192	0.512661										0.394525	0.811236	0.684728	0.267225	0.487954	0.294245
		0.021461	0.363685	0.499746	0.238083	0.385776	0.0664646										0.425548	0.0687966	0.382608	0.885391	0.218669	0.0822278
		0.0822593	0.455666	0.416186	1	0.152832	0.235261										0.248795	0.491328	0.307332	0.376693	0.272282	0.2289
		0.456743	0.809332	0.206018	0.637136	0.8169	0.536636										0.12297	0.453316	0.0775002	0.268939	0.239982	0.300502
		0.023141	0.146727	0.858205	0.634703	0.553974	0.645295										0.587516	0.618441	0.116029	0.221153	0.515906	0.0782736
		0.490649	0.252815	0.178701	0.452437	0.599378	0.194801										0.209667	0.219346	0.206988	0.153541	0.4943	0.376259
		0.00205001	0.295907	0.565019	0.11726	0.248069	0.528453										0.375311	0.813921	0.538907	0.667382	0.304883	0.0337161
		0.0119718	0.382341	0.0568145	0.246686	0.459141	0.444792										0.394341	0.443712	0.150148	0.30608	0.476229	0.644783
		0.279523	0.239175	0.596637	0.337154	0.261304	0.0616146										0.176721	0.27524	0.443378	0.802428	0.415436	0.631724
		0.162752	0.847731	0.711311	0.00109435	0.399575	0.419506										0.442109	0.258405	0.372297	0.404692	0.391404	0.416177
		0.0762314	0.251439	0.966839	0.516206	0.508825	0.407464										0.352203	0.163326	0.310037	0.375985	0.268423	0.618422
		0.219196	0.620009	0.386038	1	0.167003	0.153944										0.400541	0.680997	0.128537	0.744772	0.405781	0.76825
		0.374811	0.454822	0.414428	0.732298	0.381593	0.33287										0.531578	0.317747	0.591958	0.431049	0.576711	0.179358
		0.55037	0.501632	0.0163631	0.297479	0.759542	0.352558										0.257204	0.255795	0.266573	0.162978	0.300094	0.0728459
		0.787718	0.512963	0.195445	0.583719	0.260652	0.43245										0.362642	0.244728	0.195672	0.476582	0.246913	0.214775
		0.861973	0.526201	0.134018	0.217792	0.0952823	0.19272										0.122575	0.35189	0.351669	0.266058	0.421782	0.373262
		0.521263	0.258483	0.666303	0.281756	0.790559	0.22656										0.743446	0.742547	0.326759	0.293937	0.170241	0.414437
		0.258286	0.57889	0.44439	0.338811	0.957881	0.740307										0.556589	0.00952845	0.178417	0.103709	0.278659	0.395034
		0.146221	0.676032	0.209884	0.569792	0.911944	0.631743										0.0231973	0.822644	0.218668	0.0881613	0.703525	0.198056
		0.335743	0.541431	0.843796	0.535551	0.261458	0.443768										0.366047	0.431937	0.98657	0.771315	0.278512	0.443359
		0.205861	0.910415	0.460754	0.024242	0.645471	0.289087										0.815955	0.645861	0.79176	0.516167	0.424399	0.0905517
		0.572955	0.309281	0.235761	1	0.30081	0.59588										0.427542	0.398386	0.113978	0.237331	0.225193	0.614381
		0.0502265	0.347095	0.681529	0.478584	0.897115	0.422344										0.312631	0.2964	0.637549	0.448274	0.495421	0.259394
		0.0956291	0.307963	0.441805	0.29989	0.731753	0.18003										0.440638	0.916235	0.657694	0.20193	0.87207	0.0636014
		0.412823	0.0199091	0.387057	0.23095	0.212606	0.766861										0.909781	0.319533	0.505768	0.582037	0.611129	0.411147
		0.75346	0.330492	0.099087	0.316008	0.459546	0.91292										0.215589	0.457278	0.371604	0.183087	0.465721	0.80329
		0.709526	0.894331	0.316496	0.804844	0.189373	0.93077										0.621061	0.492077	0.569573	0.380502	0.350514	0.214749
		0.415148	0.60008	0.493561	0.510094	0.59662	0.221034										0.512106	0.440016	0.225041	0.771065	0.610146	0.854441
		0.406244	0.421252	0.619706	1	0.48056	0.227233										0.677152	0.390715	0.769454	0.871867	0.569837	0.303186
		0.567949	0.28042	0.50405	0.743642	0.72416	0.462983										0.359985	0.313741	0.22374	0.304013	0.0300909	0.644071
		0.230284	0.144738	0.397362	0.497344	0.765959	0.619502										0.528954	0.0665707	0.376636	0.0284498	0.378964	0.595771
		0.238283	0.604474	0.0233229	0.209795	0.43002	0.488165										0.444717	0.462184	0.0266121	0.484937	0.270992	0.422661
		0.44566	0.305891	0.318387	0.641311	0.873699	0.952232										0.797303	0.266296	0.209817	0.288175	0.58169	0.24483
		0.454463	0.311559	0.255233	0.328426	0.228373	0.370552										0.449549	0.827776	0.429275	0.434484	0.151134	0.271253
		0.780595	0.730209	0.161729	0.387158	0.23601	0.661173										0.447064	0.386202	0.323725	0.390461	0.230727	0.241645
		0.577519	0.126565	0.576374	0.493896	0.0441687	0.427107										0.391784	0.339837	0.869572	0.719101	0.14526	0.381416
		0.71557	0.216371	0.784444	0.860331	0.149168	0.629664										0.712911	0.328844	0.744978	0.434778	0.438162	0.306493
		0.492678	0.253812	0.212168	0.999984	0.763986	0.0637482										0.659107	0.956996	0.719003	0.716465	0.364282	0.144011
		0.866626	0.582237	0.334922	0.637534	0.227494	0.737521										0.436377	0.489323	0.13811	0.681458	0.600482	0.153454
		0.635038	0.403827	0.347713	0.938757	0.247011	0.519396										0.430682	0.903309	0.523867	0.321159	0.317577	0.302364
		0.238872	0.507652	0.50068	0.412103	0.414315	0.25586										0.129333	0.412692	0.393154	0.707132	0.0753124	0.011992
		0.630519	0.257793	0.216343	0.943837	0.745134	0.745474										0.122602	0.201121	0.0299835	0.740603	0.7778	0.214609
		0.823411	0.346374	0.27541	1	0.730542	0.0389262										0.708418	0.222579	0.412002	0.155168	0.20932	0.221017
		0.234824	0.359095	0.269427	0.752932	0.0874499	0.246326										0.354	0.420998	0.455254	0.577116	0.058628	0.630472
		0.487263	0.0779368	0.594724	0.850868	0.799925	0.313789										0.680901	0.553219	0.24068	0.366974	0.536883	0.535134
		0.530069	0.480345	0.0610705	0.658127	0.509408	0.227111										0.778883	0.554913	0.547327	0.243688	0.385599	0.0760436
		0.477655	0.467289	0.524462	0.555155	0.760247	0.0152018										0.0485472	0.210671	0.420203	0.636841	0.650226	0.380867
		0.0686251	0.598773	0.413987	0.626414	0.612466	0.419677										0.579156	0.752852	0.715649	0.794579	0.236045	0.339484
		0.538158	0.47475	0.657476	0.0239598	0.0348861	0.500767										0.454203	0.536212	0.577043	0.0767522	0.4886	0.612829
		0.45384	0.645387	0.569739	0.469918	0.5487	0.466714										0.581508	0.0626287	0.546616	0.901932	0.0569654	0.0683789
		0.459401	0.449121	0.253758	0.863112	0.893149	0.734985										0.321755	0.18681	0.28158	0.691569	0.802941	0.688052
		0.360549	0.329253	0.541	0.87137	0.762072	0.227904										0.0163722	0.635767	0.608203	0.502349	0.171408	0.265794
		0.736658	0.27152	0.395318	0.511409	0.589859	0.749171										0.227758	0.600183	0.387489	0.327912	0.82293	0.598242
		0.0628399	0.372652	0.460453	0.924736	0.209853	0.116725										0.0660491	0.462446	0.198954	0.0886849	0.0789013	0.472682
		0.096487	0.313733	0.81474	0.378594	0.434364	0.465713										0.782138	0.151805	0.376811	0.23544	0.262597	0.27275
		0.154871	0.141068	0.16094	0.574091	0.777744	0.250554										0.187986	0.391155	0.60854	0.604261	0.130685	0.55352
		0.23462	0.36627	0.518168	0.221964	0.251296	0.390804										0.394292	0.448684	0.253595	0.0786739	0.455934	0.320122
		0.324169	0.193198	0.201476	0.935787	0.193021	0.3338										0.644706	0.176095	0.589607	0.172843	0.236144	0.516253
		0.235868	0.465903	0.561957	1	0.341477	0.189949										0.942438	0.260216	0.946177	0.159341	0.919586	0.480999
		0.916462	0.696994	0.331643	0.892747	0.470229	0.887835										0.304522	0.497775	0.386876	0.479566	0.379256	0.364104
		0.0979718	0.304343	0.26459	0.316998	0.355219	0.878825										0.862929	0.892408	0.333839	0.381047	0.523023	0.575073
		0.221661	0.0352135	0.574822	0.0410892	0.471041	0.624955										0.548584	0.231884	0.195026	0.122666	0.0241128	0.193939
		0.48641	0.194121	0.429857	0.403687	0.844365	0.748316										0.120081	0.134203	0.587651	0.423754	0.282384	0.322591
		0.397604	0.183521	0.428755	0.677639	0.694818	0.791337										0.548611	0.514693	0.695553	0.230248	0.281995	0.502874
		0.0706546	0.708252	0.668481	0.595423	0.402641	0.571783										0.366644	0.643834	0.465609	0.793582	0.398311	0.325179
		0.607363	0.341031	0.744416	0.257203	0.589176	0.461234										0.280211	0.852489	0.262765	0.180006	0.0860085	0.431235
		0.597311	0.0232714	0.416167	0.489568	0.33443	0.354947										0.375441	0.551391	0.443471	0.712293	0.756671	0.398538
		0.693495	0.654324	0.73426	1	0.858334	0.0422074										0.815009	0.686531	0.935419	0.2342	0.584145	0.112544
		0.322879	0.108094	0.350365	0.641677	0.0449503	0.500349										0.947669	0.213545	0.338776	0.315567	0.203462	0.193683
		0.777806	0.486694	0.229716	0.372447	0.284492	0.509006										0.599752	0.727482	0.231938	0.325613	0.521029	0.327347
		0.312795	0.137289	0.224572	0.110738	0.200347	0.722328										0.462511	0.685782	0.0507158	0.484824	0.374885	0.00697755
		0.291129	0.418292	0.850442	0.782842	0.157126	0.845195										0.539958	0.197584	0.279698	0.931221	0.661024	0.0336092
		0.203975	0.0108714	0.0451889	0.515138	0.0348025	0.305506										0.828074	0.666549	0.794003	0.193117	0.638132	0.229898
		0.580541	0.651846	0.76835	0.537629	0.714846	0.242989										0.229847	0.381527	0.552468	0.185618	0.563237	0.278992
		0.759218	0.0211374	0.2756	1	0.824811	0.575748										0.331975	0.734253	0.0364766	0.437968	0.212269	0.0997605
		0.774554	0.129487	0.336995	0.300734	0.440766	0.331854										0.707154	0.211287	0.352438	0.345323	0.264398	0.133308
		0.507101	0.22089	0.209707	0.507196	0.914735	0.475417										0.44311	0.47432	0.314528	0.18902	0.488933	0.47423
		0.530621	0.347673	0.249622	0.346656	0.649175	0.627267										0.722617	0.277759	0.459092	0.14768	0.510604	0.0615874
		0.391978	0.0148792	0.154697	0.581688	0.356624	0.335472										0.372437	0.527981	0.825583	0.629768	0.223818	0.694642
		0.254317	0.545291	0.328604	0.245438	0.442085	0.0421373										0.249742	0.0784924	0.259439	0.0294591	0.3742	0.403335
		0.794082	0.215683	0.499159	0.547274	0.0214873	0.660301										0.618981	0.514479	0.655606	0.287688	0.330368	0.350364
		0.147212	0.263636	0.182103	0.0445589	0.711356	0.552207										0.51942	0.569069	0.780862	0.76984	0.203625	0.813947
		0.262603	0.0986279	0.389647	0.250582	0.620582	0.272577										0.211241	0.501059	0.304722	0.318749	0.229982	0.213331
		0.197817	0.219623	0.196423	0.534731	0.865977	0.414463										0.564413	0.487243	0.46115	0.171603	0.0786948	0.0865092
		0.920794	0.813356	0.390719	0.255008	0.338927	0.882581										0.516577	0.360625	0.236246	0.294246	0.347882	0.322361
		0.662774	0.626956	0.704567	0.0271243	0.514935	0.921719										0.804971	0.955402	0.365178	0.498439	0.609538	0.434999
		0.546733	0.588807	0.267383	0.434751	0.662872	0.873477										0.19895	0.0959281	0.462687	0.181043	0.531796	0.0692443
		0.740426	0.357049	0.437221	0.433371	0.458579	0.324899										0.322928	0.333691	0.703183	0.35309	0.195896	0.774432
		0.181364	0.0491068	0.716985	0.489154	0.35613	0.147126										0.567822	0.282065	0.186061	0.230632	0.117758	0.0799961
		0.448135	0.652055	0.477088	0.45346	0.0687439	0.32574										0.527883	0.182461	0.342841	0.886066	0.475638	0.522622
		0.592052	0.331534	0.1779	0.634481	0.768335	0.775262										0.273459	0.249851	0.252128	0.263894	0.333901	0.127458
		0.324653	0.817354	0.538904	0.648602	0.767414	0.717325										0.132386	0.530144	0.684884	0.578542	0.450526	0.621844
		0.665598	0.24948	0.435344	0.445889	0.581667	0.237979										0.621326	0.330237	0.268309	0.544332	0.212162	0.455738
		0.365432	0.524252	0.0803052	1	0.866919	0.118241										0.608898	0.0843892	0.0401333	0.0237933	0.447248	0.0773565
		0.49405	0.220986	0.352542	0.916377	0.414676	0.236311										0.194163	0.920292	0.487305	0.644387	0.876163	0.177016
		0.152026	0.012106	0.125057	0.774163	0.524771	0.584514										0.437757	0.610029	0.177178	0.841445	0.053086	0.144978
		0.210775	0.298308	0.466098	0.0486254	0.65743	0.397311										0.914593	0.117838	0.634702	0.246988	0.215038	0.750985
		0.195038	0.466606	0.748739	0.133971	0.68715	0.610399										0.356091	0.84279	0.706994	0.0902522	0.395173	0.390393
		0.210559	0.186915	0.49103	0.21288	0.387203	0.900737										0.428075	0.0171863	0.409499	0.383408	0.384738	0.458754
		0.278133	0.301298	0.522307	0.507291	0.381894	0.628144										0.599121	0.543649	0.313788	0.315306	0.223259	0.552896
		0.444319	0.267604	0.325784	0.138224	0.65017	0.154276										0.903283	0.50101	0.295066	0.388488	0.364471	0.111873
		0.364539	0.544987	0.482213	0.351374	0.843192	0.291291										0.584731	0.3488	0.461324	0.247823	0.346436	0.175071
		0.892864	0.338885	0.386332	0.246234	0.693324	0.876824										0.65744	0.400797	0.345752	0.0301351	0.29346	0.527893
		0.125172	0.307158	0.0845173	0.162304	0.421528	0.849504										0.00791557	0.790067	0.0625665	0.249576	0.927952	0.403458
		0.0485534	0.247275	0.390437	1	0.830853	0.122486										0.849134	0.324617	0.135803	0.62252	0.469848	0.256063
		0.711454	0.170729	0.01689	0.49008	0.813395	0.310877										0.476378	0.270151	0.533956	0.193671	0.218535	0.364917
		0.744596	0.585979	0.298184	0.718068	0.488932	0.656736										0.581235	0.92151	0.519223	0.0390329	0.0693409	0.443081
		0.228998	0.547258	0.171721	0.226247	0.520362	0.431469										0.377173	0.728721	0.220042	0.222258	0.404489	0.0677409
		0.85424	0.0892734	0.568816	0.40772	0.690485	0.497017										0.280395	0.322851	0.819303	0.193027	0.221208	0.362888
		0.299578	0.743855	0.43413	0.35555	0.366285	0.308342										0.0801808	0.12929	0.973378	0.348458	0.482541	0.749098
		0.666544	0.27266	0.537002	0.139347	0.258172	0.700264										0.2169	0.173533	0.306465	0.294739	0.533771	0.344556
		0.549012	0.0639933	0.285251	0.346286	0.060367	0.509495										0.126877	0.244192	0.657781	0.361112	0.760357	0.962699
		0.379176	0.596534	0.220444	0.17477	0.781869	0.463103										0.290232	0.0853199	0.605231	0.246119	0.876888	0.49731
		0.734324	0.289554	0.606739	0.0198913	0.588503	0.92116										0.221676	0.509701	0.24888	0.0308382	0.555068	0.097555
		0.742294	0.471142	0.287139	0.713043	0.162566	0.581926										0.296698	0.867304	0.109564	0.173233	0.702897	0.14413
		0.253367	0.190063	0.50605	0.160977	0.884997	0.273754										0.152979	0.636894	0.185337	0.704489	0.543371	0.463509
		0.913321	0.468394	0.378039	0.2665	0.154114	0.672072										0.900396	0.18265	0.715883	0.280385	0.248633	0.165037
		0.578807	0.377113	0.519645	0.296489	0.685961	0.685208										0.496116	0.228205	0.789411	0.558158	0.319343	0.283295
		0.697833	0.273501	0.338984	0.240391	0.469215	0.468047										0.326855	0.00428921	0.274244	0.374414	0.178404	0.808799
		0.67233	0.545574	0.402096	0.16638	0.165183	0.519353										0.665755	0.792587	0.482791	0.398696	0.688427	0.237354
		0.103179	0.413751	0.67832	0.895123	0.563771	0.352979										0.0963764	0.287032	0.386615	0.393606	0.406149	0.0217993
		0.741429	0.837161	0.370322	0.231195	0.199035	0.30383										0.727049	0.655505	0.388689	0.732825	0.483922	0.156335
		0.53724	0.4662	0.016335	0.171286	0.658698	0.674865										0.176101	0.178967	0.0671742	0.461743	0.194969	0.257616
		0.137593	0.342902	0.958342	1	0.709977	0.160935										0.473828	0.916384	0.146962	0.160387	0.507028	0.152568
		0.505044	0.482288	0.63289	0.620415	0.131671	0.00629873										0.203901	0.111159	0.755639	0.509924	0.176597	0.179855
		0.0530582	0.0847654	0.216201	1	0.558122	0.579006										0.210424	0.742631	0.280939	0.139746	0.342215	0.493267
		0.495375	0.48831	0.579176	0.279767	0.536431	0.784246										0.0707598	0.550535	0.255653	0.115876	0.493137	0.33017
		0.37851	0.190705	0.240252	0.936791	0.467959	0.585915										0.93766	0.332345	0.261756	0.25567	0.499964	0.0159492
		0.24605	0.371044	0.245389	0.643826	0.311252	0.255384										0.480599	0.623708	0.471157	0.467148	0.292085	0.586236
		0.333541	0.237604	0.280475	0.413971	0.185866	0.594381										0.275249	0.591022	0.217726	0.172276	0.957427	0.256897
		0.16653	0.207663	0.766457	0.276251	0.942782	0.257048										0.186607	0.823104	0.436587	0.251055	0.50905	0.164783
		0.536595	0.340968	0.197743	0.608508	0.0579486	0.778565										0.299219	0.107276	0.380673	0.185373	0.0465915	0.698861
		0.652758	0.27058	0.551126	0.349122	0.333423	0.482215										0.272839	0.251179	0.323103	0.497076	0.0881775	0.381897
		0.694387	0.350643	0.520337	0.327236	0.778531	0.2487										0.36462	0.418547	0.575725	0.572763	0.118839	0.239409
		0.458697	0.270189	0.614113	0.35383	0.388043	0.214027										0.199181	0.587733	0.37187	0.358553	0.167168	0.297657
		0.45085	0.855735	0.771747	0.301904	0.427203	0.295614										0.4078	0.217591	0.346292	0.582555	0.786878	0.401247
		0.814777	0.460374	0.359946	0.150327	0.528641	0.537134										0.544099	0.200712	0.257116	0.644374	0.196808	0.0544042
		0.137847	0.494002	0.210831	0.490921	0.35906	0.249067										0.136553	0.799645	0.257716	0.184819	0.662661	0.207348
		0.612905	0.332228	0.865335	0.532303	0.929336	0.166001										0.867149	0.0590924	0.057135	0.604093	0.122415	0.455595
		0.357092	0.256622	0.0162955	0.21346	0.729715	0.35657										0.068007	0.0930443	0.739678	0.0871558	0.570032	0.619844
		0.130464	0.213135	0.0731924	0.508851	0.490695	0.0387543										0.231157	0.348256	0.794834	0.381483	0.312368	0.829752
		0.220805	0.893689	0.459235	1	0.660239	0.387591										0.208962	0.354078	0.239638	0.028464	0.355397	0.255546
		0.943343	0.439169	0.57397	0.286469	0.508546	0.614936										0.600924	0.65935	0.169163	0.7994	0.401611	0.926303
		0.276221	0.362466	0.520034	0.607009	0.227824	0.433846										0.150684	0.180264	0.252855	0.374589	0.378503	0.283145
		0.237791	0.131608	0.759732	0.6121	0.36522	0.246158										0.278087	0.485532	0.250261	0.530966	0.24707	0.284118
		0.329583	0.693948	0.290076	0.873345	0.684037	0.856241										0.318926	0.783005	0.536328	0.632591	0.21668	0.214022
		0.651873	0.541052	0.681629	0.288408	0.760289	0.307613										0.261344	0.309757	0.30858	0.121857	0.312314	0.293462
		0.399944	0.39388	0.150331	0.356868	0.638999	0.300752										0.459246	0.8484	0.56967	0.721577	0.662393	0.46325
		0.750938	0.165984	0.151574	0.910564	0.0150127	0.739982										0.393346	0.466304	0.377464	0.9607	0.313223	0.887059
		0.212114	0.500092	0.511545	0.845096	0.825444	0.831457										0.455391	0.0212062	0.621176	0.292924	0.262227	0.201923
		0.572348	0.211876	0.254237	0.380959	0.211024	0.791561										0.478697	0.262137	0.70893	0.301849	0.38907	0.186265
		0.393369	0.210973	0.382588	0.412698	0.260043	0.453584										0.877717	0.495177	0.509721	0.48628	0.131495	0.422858
		0.251325	0.196256	0.281436	0.170313	0.64206	0.0275473										0.959675	0.61606	0.807908	0.50628	0.716774	0.498115
		0.0580423	0.145354	0.187132	0.346054	0.542318	0.890372										0.709946	0.789592	0.22981	0.565777	0.871425	0.718607
		0.261386	0.21115	0.299905	0.125841	0.720915	0.563953										0.328954	0.432065	0.0314313	0.0320172	0.00920128	0.873639
		0.171825	0.0484818	0.54792	0.406223	0.306974	0.704469										0.322916	0.398027	0.11915	0.64568	0.244648	0.812683
		0.966194	0.177835	0.755864	0.658421	0.33652	0.0150761										0.828954	0.0447979	0.170096	0.17946	0.674295	0.461726
		0.390987	0.213141	0.195508	0.334192	0.826593	0.61469										0.854099	0.0707113	0.127791	0.819614	0.245812	0.550572
		0.334926	0.0907388	0.0268694	0.606001	0.6811	0.873077										0.48321	0.705891	0.315819	0.394635	0.368455	0.343542
		0.703412	0.684626	0.352891	0.355114	0.29174	0.309043										0.629957	0.945668	0.0824879	0.301762	0.147994	0.0580694
		0.45545	0.107348	0.35535	0.205396	0.192595	0.543645										0.0489121	0.381104	0.683509	0.111206	0.428354	0.435063
		0.585456	0.581771	0.239826	0.430657	0.49785	0.358783										0.583702	0.0370366	0.263769	0.466974	0.0158022	0.366238
		0.324831	0.277281	0.899011	0.516908	0.570429	0.428873										0.446237	0.352852	0.230607	0.0781366	0.494031	0.103039
		0.50155	0.685381	0.196981	0.349196	0.534257	0.881318										0.165679	0.911926	0.300949	0.335095	0.166473	0.152168
		0.88703	0.346936	0.165002	0.730889	0.32861	0.0341534										0.632534	0.876412	0.0705494	0.534904	0.0357768	0.288306
		0.245418	0.351507	0.691817	0.617754	0.647299	0.592402										0.929742	0.896487	0.481537	0.192467	0.541598	0.247663
		0.189535	0.570862	0.318964	0.119664	0.322629	0.347062										0.366942	0.399803	0.229064	0.156401	0.758786	0.157693
		0.259574	0.108795	0.358202	0.468214	0.349542	0.319056										0.362225	0.360602	0.181125	0.622614	0.144539	0.276352
		0.691948	0.350381	0.579141	0.244673	0.331815	0.28663										0.52841	0.278132	0.449188	0.242985	0.378086	0.184179
		0.527671	0.795145	0.211109	0.869104	0.627314	0.219175										0.680158	0.582822	0.254851	0.998403	0.518218	0.33557
		0.881907	0.289926	0.723702	0.155246	0.151967	0.00546868										0.136084	0.428452	0.484552	0.22742	0.742259	0.275148
		0.668316	0.296388	0.319553	0.374188	0.619027	0.286034										0.469565	0.718291	0.376117	0.517252	0.482208	0.208834
		0.267701	0.281516	0.29535	0.227838	0.648423	0.689859										0.899988	0.0641874	0.252779	0.0302843	0.295676	0.269887
		0.104144	0.353133	0.46132	0.281672	0.330549	0.555686										0.746969	0.240302	0.680413	0.17387	0.201212	0.338911
		0.691613	0.0358386	0.114544	0.561858	0.197364	0.592541										0.976472	0.484185	0.536214	0.295527	0.52047	0.076722
		0.360728	0.592568	0.519857	0.759573	0	0.505637										0.86136	0.83077	0.329001	0.168991	0.368641	0.425679
		0.79809	0.400407	0.178195	0.793189	0.837714	0.522077										0.425988	0.0592045	0.0537559	0.860938	0.154576	0.287425
		0.76172	0.0815145	0.448049	0.596845	0.43605	0.0179153										0.959623	0.197188	0.881516	0.098908	0.180601	0.153248
		0.91157	0.869517	0.289303	0.23357	0.801542	0.63685										0.233063	0.030152	0.383556	0.371033	0.194371	0.617536
		0.543887	0.29873	0.75618	0.341515	0.581232	0.866507										0.330022	0.249168	0.26592	0.618382	0.84285	0.214972
		0.394663	0.521983	0.119734	0.480685	0.761689	0.766686										0.34066	0.375278	0.53516	0.181683	0.227883	0.369665
		0.2714	0.116815	0.38076	0.404367	0.189278	0.870324										0.849636	0.2637	0.115097	0.232939	0.799889	0.88772
		0.386513	0.208551	0.24722	0.180335	0.355733	0.124733										0.716131	0.0176637	0.173808	0.624644	0.377411	0.299846
		0.561953	0.580451	0.2956	0.261845	0.190853	0.787349										0.798959	0.203982	0.635748	0.539842	0.39039	0.114066
		0.0597187	0.49562	0.409528	0.513033	0.0981694	0.51208										0.448487	0.0882251	0.509199	0.0969139	0.512877	0.346917
		0.606486	0.316925	0.190493	0.319262	0.792427	0.586784										0.109351	0.747795	0.506356	0.565708	0.277167	0.0839468
		0.525064	0.393904	0.815904	0.614502	0.697382	0.51329										0.316006	0.218635	0.713124	0.480785	0.122798	0.329168
		0.319345	0.0467991	0.0123352	0.0584961	0.568918	0.264871										0.237957	0.255661	0.502191	0.600058	0.543587	0.397474
		0.67171	0.331186	0.176386	0.440802	0.374943	0.360978										0.834145	0.229777	0.506239	0.252664	0.500703	0.445295
		0.601651	0.785305	0.253404	0.178307	0.396551	0.0222605										0.5658	0.149276	0.0699645	0.497242	0.72195	0.199213
		0.747665	0.452719	0.159905	0.770803	0.540312	0.708196										0.200975	0.0789061	0.351832	0.362849	0.621441	0.76189
		0.4335	0.235889	0.539192	0.531548	0.840497	0.427151										0.810476	0.985953	0.556352	0.318467	0.886229	0.87774
		0.137302	0.33592	0.188208	0.465338	0.557778	0.567999										0.238606	0.220928	0.658884	0.5104	0.227929	0.319029
		0.439203	0.297653	0.188355	0.345143	0.512929	0.250351										0.621848	0.267713	0.344972	0.523568	0.20566	0.4631
		0.413605	0.475319	0.289788	0.145213	0.335262	0.214045										0.206146	0.672866	0.0687756	0.828534	0.320669	0.057447
		0.139761	0.567923	0.367902	0.329381	0.959019	0.198138										0.194152	0.367944	0.300159	0.183949	0.447149	0.684008
		0.252224	0.501859	0.566783	0.784125	0.92538	0.0211988										0.34151	0.248772	0.36479	0.377033	0.564787	0.484278
		0.146126	0.811728	0.15335	0.800536	0.612718	0.535553										0.246615	0.286844	0.339111	0.215937	0.186646	0.404184
		0.303431	0.518686	0.502639	0.610464	0.777124	0.444064										0.501821	0.907124	0.693385	0.0751939	0.0496616	0.0233165
		0.907838	0.207989	0.596773	0.76184	0.58296	0.223171										0.505082	0.698253	0.273566	0.486245	0.294272	0.169766
		0.678047	0.393165	0.270658	1	0.20163	0.257628										0.0385247	0.595113	0.365396	0.245898	0.021774	0.494967
		0.271436	0.194961	0.0314341	0.00955022	0.316817	0.20395										0.915404	0.194175	0.221414	0.208547	0.20304	0.760248
		0.938117	0.833875	0.430212	0.345343	0.653889	0.28186										0.320546	0.693667	0.330689	0.334844	0.702081	0.207411
		0.17088	0.423671	0.907877	0.79837	0.332506	0.304268										0.365181	0.186356	0.407309	0.526168	0.179388	0.496328
		0.238917	0.204775	0.1646	0.31668	0.445416	0.0262933										0.561251	0.40604	0.411664	0.249083	0.382329	0.296119
		0.0965838	0.423083	0.43516	0.323056	0.775619	0.67351										0.485758	0.264329	0.552055	0.589213	0.222582	0.358144
		0.209657	0.444504	0.154639	0.283856	0.657498	0.825647										0.309711	0.287632	0.451833	0.3505	0.64254	0.603171
		0.389442	0.232672	0.485012	0.253412	0.96449	0.372452										0.785633	0.915426	0.22138	0.437446	0.399088	0.300101
		0.566031	0.510265	0.0458893	0.366938	0.955808	0.763505										0.915488	0.18013	0.391922	0.415028	0.697044	0.41539
		0.740824	0.23645	0.168666	0.516932	0.465614	0.318308										0.267778	0.400686	0.378563	0.162024	0.0845194	0.610709
		0.202914	0.436345	0.278072	0.470313	0.824882	0.665209										0.632452	0.411224	0.101138	0.589154	0.562017	0.259481
		0.442148	0.591957	0.328851	0.185012	0.00360221	0.891237										0.629179	0.179105	0.882482	0.341211	0.636913	0.213207
		0.91307	0.0887375	0.127001	0.0815142	0.451521	0.355202										0.608099	0.61413	0.398213	0.594578	0.11319	0.185432
		0.477403	0.231198	0.36521	0.0281746	0.260098	0.362945										0.029781	0.418073	0.164314	0.814847	0.522068	0.411275
		0.464679	0.0155965	0.623391	0.433088	0.287762	0.379056										0.79653	0.542276	0.241283	0.0489916	0.410281	0.460977
		0.653457	0.69859	0.48055	0.57309	0.420751	0.279659										0.501275	0.516372	0.848111	0.440024	0.246058	0.263551
		0.966434	0.289698	0.877456	0.839871	0.708412	0.707001										0.303245	0.0622718	0.216749	0.425463	0.401111	0.314808
		0.523607	0.25124	0.33972	0.491662	0.119474	0.633115										0.245567	0.421937	0.0719891	0.513087	0.339634	0.457288
		0.269614	0.218158	0.678436	0.587085	0.847364	0.298466										0.199753	0.213163	0.808498	0.627956	0.697011	0.299517
		0.229716	0.509096	0.404929	0.414777	0.297342	0.127637										0.232439	0.172456	0.455617	0.109971	0.567988	0.707436
		0.151406	0.0122878	0.740857	0.775713	0.535407	0.529052										0.239796	0.364899	0.451935	0.209186	0.0947623	0.621974
		0.0932811	0.679908	0.173684	0.209338	0.620658	0.795798										0.182769	0.587205	0.0691161	0.136313	0.376867	0.240931
		0.208823	0.0214693	0.254058	0.247924	0.634755	0.41735										0.44658	0.497432	0.506308	0.193036	0.1053	0.153759
		0.578093	0.403282	0.522866	0.44917	0.214899	0.649063										0.312998	0.0348962	0.730094	0.35135	0.176075	0.201545
		0.700701	0.412108	0.470719	0.208043	0.36048	0.631025										0.52602	0.726613	0.321463	0.180979	0.223936	0.471387
		0.416563	0.352063	0.330573	0.624378	0.360103	0.200093										0.268306	0.372305	0.773166	0.622043	0.608598	0.087123
		0.153051	0.526599	0.757702	0.899841	0.10829	0.301277										0.0738213	0.426838	0.0589466	0.314284	0.245189	0.358028
		0.457314	0.522485	0.179833	0.781283	0.881078	0.406239										0.769088	0.197389	0.340267	0.0264588	0.540197	0.319058
		0.397395	0.405397	0.159513	0.623346	0.461002	0.0335031										0.407626	0.286351	0.384455	0.336758	0.0494356	0.463603
		0.962037	0.0533089	0.334997	0.329548	0.653003	0.122132										0.187609	0.37129	0.377827	0.279949	0.267955	0.507362
		0.37468	0.660081	0.395728	0.383355	0.312035	0.70833										0.807803	0.3105	0.401727	0.431997	0.75686	0.30117
		0.604212	0.0360846	0.355132	0.0537738	0.684908	0.476798										0.0630332	0.943676	0.425354	0.739888	0.444664	0.533646
		0.515651	0.722005	0.0512669	0.082559	0.745353	0.561257										0.142038	0.34903	0.260048	0.24606	0.256867	0.0388808
		0.279637	0.336153	0.727743	0.194912	0.674631	0.282677										0.505924	0.321288	0.423291	0.317407	0.593708	0.311577
		0.198515	0.357235	0.78118	1	0.840911	0.543467										0.488606	0.620934	0.49743	0.167415	0.245682	0.578226
		0.239584	0.771558	0.452023	0.552822	0.0527235	0.871804										0.4087	0.693273	0.212216	0.0639996	0.616607	0.396575
		0.322315	0.847146	0.0194135	0.302078	0.189453	0.00985607										0.545374	0.474858	0.647905	0.715553	0.487708	0.170408
		0.747873	0.265271	0.147173	0.43523	0.421849	0.460356										0.225642	0.922532	0.894972	0.226668	0.274843	0.558417
		0.606464	0.351128	0.191907	0.668047	0.516446	0.671667										0.0938385	0.766285	0.207319	0.428273	0.36432	0.314411
		0.518975	0.491582	0.0555933	0.583052	0.790091	0.147286										0.419527	0.2465	0.258981	0.180802	0.701485	0.517265
		0.238924	0.316152	0.191986	0.544234	0.420072	0.648115										0.303605	0.384176	0.928717	0.89724	0.83743	0.287188
		0.48451	0.39668	0.227759	0.290092	0.482445	0.165473										0.436898	0.628555	0.444548	0.361423	0.125099	0.962551
		0.43505	0.345708	0.33105	0.0841348	0.467909	0.334339										0.161583	0.434921	0.587124	0.75144	0.199034	0.125033
		0.574585	0.335586	0.0629278	0.15924	0.70588	0.801396										0.524973	0.613763	0.425207	0.127905	0.398454	0.392099
		0.0102995	0.115068	0.418865	0.614888	0.741704	0.748413										0.207806	0.287213	0.412123	0.439386	0.6524	0.0934994
		0.814181	0.248173	0.687123	0.668516	0.813403	0.634972										0.0802659	0.218202	0.25129	0.197838	0.262831	0.304209
		0.427441	0.1136	0.324184	0.583643	0.395155	0.810484										0.472834	0.57875	0.424231	0.279032	0.639493	0.375056
		0.367739	0.218241	0.959086	0.285528	0.3296	0.857577										0.482895	0.855659	0.380807	0.490101	0.100617	0.285839
		0.214578	0.69401	0.403855	0.80928	0.266958	0.26709										0.89848	0.103922	0.427419	0.475472	0.104767	0.170683
		0.203746	0.204773	0.366067	0.0151659	0.179962	0.689926										0.945792	0.466447	0.602544	0.461743	0.859407	0.417866
		0.923258	0.375819	0.342032	0.255368	0.648447	0.805185										0.219289	0.247376	0.354926	0.225594	0.401344	0.336785
		0.815043	0.289051	0.0535215	0.655266	0.639499	0.585117										0.547702	0.158888	0.63305	0.385798	0.0431712	0.190718
		0.460793	0.809527	0.262374	0.403519	0.293268	0.28032										0.262136	0.0925757	0.491653	0.749115	0.431216	0.725023
		0.51124	0.443609	0.315538	0.724438	0.400541	0.603294										0.356398	0.566206	0.197718	0.510484	0.76413	0.392624
		0.881505	0.130566	0.241056	0.780929	0.513579	0.509702										0.701913	0.171156	0.323353	0.401043	0.500947	0.212939
		0.620221	0.460925	0.375679	0.942001	0.290332	0.234466										0.242569	0.543213	0.831065	0.521146	0.266909	0.13919
		0.280143	0.108137	0.119215	0.375021	0.328582	0.359419										0.10649	0.673614	0.480191	0.12245	0.376216	0.468556
		0.594766	0.519331	0.422382	0.144688	0.497996	0.404275										0.232941	0.456359	0.508913	0.0467074	0.431385	0.421078
		0.417377	0.677472	0.369832	0.581465	0.113351	0.361861										0.355246	0.393319	0.0929186	0.379038	0.240794	0.314862
		0.315664	0.556168	0.426232	0.890291	0.838442	0.328806										0.664349	0.926995	0.372877	0.174795	0.177093	0.349006
		0.216861	0.37681	0.473348	0.383873	0.802743	0.305083										0.195367	0.885771	0.163886	0.154461	0.291841	0.309993
		0.324594	0.366134	0.219789	0.374788	0.399899	0.621904										0.94043	0.0583289	0.387752	0.319611	0.682633	0.144687
		0.556047	0.36875	0.297387	0.442396	0.910106	0.418699										0.173149	0.945741	0.30881	0.214006	0.226802	0.366243
		0.795162	0.349084	0.361901	0.494911	0.622837	0.750806										0.213681	0.336394	0.415838	0.0433681	0.273903	0.759977
		0.599061	0.51034	0.948427	1	0.84872	0.180757										0.431021	0.173207	0.814579	0.153031	0.539181	0.285488
		0.676155	0.223079	0.613587	0.227143	0.109202	0.275871										0.841301	0.394496	0.194242	0.00323262	0.51028	0.222035
		0.511325	0.168025	0.0752626	0.686925	0.600052	0.47351										0.389073	0.187108	0.242659	0.40219	0.311606	0.791024
		0.0190834	0.817933	0.472219	0.824455	0.738818	0.335227										0.55919	0.714972	0.481156	0.272921	0.766443	0.45993
		0.0388286	0.126628	0.770869	0.612514	0.159183	0.600882										0.407275	0.126298	0.418398	0.553716	0.236737	0.281686
		0.0484856	0.367489	0.347784	0.245442	0.472709	0.746746										0.212268	0.242217	0.550031	0.281728	0.600574	0.691595
		0.372789	0.608947	0.553408	0.700731	0.611363	0.642656										0.488166	0.652704	0.72803	0.371444	0.113368	0.224612
		0.250293	0.387062	0.898207	0.823867	0.266545	0.752667										0.210136	0.363978	0.221609	0.450545	0.529916	0.812168
		0.503558	0.718696	0.194107	0.806893	0.402932	0.138235										0.461201	0.669066	0.373219	0.14419	0.267526	0.267369
		0.170222	0.339851	0.198801	0.0341117	0.296933	0.875304										0.664126	0.138288	0.358591	0.231989	0.0566994	0.65949
		0.372502	0.164259	0.0276152	0.687509	0.523969	0.321797										0.170037	0.733542	0.626117	0.895431	0.68775	0.642485
		0.120013	0.284778	0.676379	0.0484793	0.881981	0.788656										0.301921	0.336892	0.55541	0.495822	0.773871	0.486762
		0.182648	0.0519945	0.890634	0.748815	0.598845	0.292075										0.495909	0.571428	0.6866	0.146286	0.389782	0.774218
		0.196967	0.267653	0.619597	0.0404019	0.400829	0.581162										0.395478	0.358801	0.547215	0.507668	0.411889	0.0434187
		0.151275	0.137147	0.612289	0.0193831	0.228317	0.695259										0.353215	0.138301	0.379633	0.584307	0.223493	0.553416
		0.721801	0.309993	0.358404	0.716264	0.840074	0.310205										0.414599	0.015591	0.0770459	0.362777	0.0672736	0.36365
		0.204261	0.588733	0.516405	0.62117	0.690686	0.574613										0.291781	0.20429	0.906501	0.168678	0.223061	0.288469
		0.27922	0.519863	0.359122	0.269121	0.474589	0.332778										0.837456	0.396062	0.281902	0.0783976	0.444185	0.504027
		0.898885	0.401237	0.471467	0.499969	0.758466	0.558623										0.71504	0.417975	0.173485	0.48353	0.341955	0.308502
		0.507293	0.70046	0.38142	0.225437	0.488268	0.178538										0.339405	0.784434	0.23838	0.212707	0.305514	0.261052
		0.19893	0.470457	0.0723081	0.408595	0.448021	0.115093										0.13178	0.177226	0.342371	0.27299	0.224547	0.511409
		0.587981	0.230224	0.3661	0.372873	0.249123	0.599123										0.33804	0.155444	0.494287	0.551274	0.507958	0.299705
		0.84311	0.372	0.636545	0.21739	0.595296	0.160031										0.479908	0.105964	0.344789	0.574733	0.20142	0.195957
		0.267822	0.252999	0.418023	0.286632	0.280148	0.800756										0.575762	0.143946	0.0522789	0.322095	0.32701	0.253387
		0.320589	0.017512	0.611453	0.287864	0.787308	0.702396										0.937115	0.3984	0.0379768	0.1958	0.0829553	0.453578
		0.142069	0.41997	0.258337	0.378184	0.0532388	0.283097										0.254793	0.239418	0.220622	0.156199	0.406727	0.359068
		0.166233	0.630854	0.801274	0.249278	0.75412	0.667551										0.0612923	0.382627	0.329642	0.442568	0.303614	0.146828
		0.21539	0.354102	0.525964	0.506566	0.409395	0.831655										0.574883	0.0928517	0.784645	0.174316	0.801167	0.201328
		0.89268	0.771923	0.0462515	0.806061	0.151794	0.330096										0.906777	0.704638	0.585549	0.433863	0.948575	0.0331078
		0.245276	0.256717	0.240731	0.676589	0.478485	0.825062										0.204849	0.241133	0.156703	0.479462	0.458883	0.457146
		0.152469	0.879976	0.431923	0.00156388	0.479659	0.311037										0.235742	0.645299	0.586801	0.909197	0.0994007	0.308829
		0.780715	0.347157	0.405719	0.88041	0.899181	0.186275										0.780692	0.724082	0.190048	0.295906	0.537103	0.374711
		0.803996	0.289135	0.334116	0.681722	0.421207	0.962677										0.0154595	0.585473	0.354903	0.516841	0.174574	0.687335
		0.384271	0.180179	0.441389	0.0604943	0.599015	0.485368										0.152684	0.414727	0.265521	0.259147	0.218338	0.386596
		0.617374	0.636402	0.573732	0.12676	0.0406257	0.358919										0.0313425	0.104172	0.267378	0.402536	0.277025	0.0793533
		0.90995	0.184749	0.27143	0.289567	0.165107	0.201941										0.400507	0.172208	0.32554	0.310007	0.0230702	0.486569
		0.446864	0.473739	0.665071	0.91551	0.448574	0.290694										0.446274	0.0490138	0.294178	0.0923685	0.2922	0.343972
		0.0425088	0.509784	0.522905	0.490293	0.587535	0.0232759										0.164708	0.0298305	0.385873	0.268892	0.655921	0.238981
		0.151546	0.69543	0.074029	0.642125	0.434167	0.319943										0.467848	0.389654	0.375626	0.272067	0.816495	0.805374
		0.236346	0.598452	0.150605	0.469538	0.617033	0.291514										0.192178	0.91168	0.560679	0.313573	0.251286	0.180441
		0.457568	0.49797	0.82881	0.529238	0.473179	0.570269										0.736643	0.0325995	0.484291	0.730749	0.208645	0.178825
		0.889113	0.60811	0.258142	0.387298	0.0571481	0.693948										0.55723	0.174985	0.291904	0.621304	0.299033	0.0723925
		0.136982	0.618433	0.211101	0.294417	0.201545	0.492695										0.145486	0.931054	0.00569274	0.932777	0.121029	0.469321
		0.245155	0.480175	0.382977	0.815229	0.71364	0.764423										0.426049	0.374449	0.277342	0.277465	0.639358	0.369637
		0.724714	0.526404	0.445406	0.395522	0.359995	0.346434										0.629072	0.471408	0.555988	0.569544	0.0934346	0.571344
		0.427592	0.382083	0.321121	0.464921	0.0722548	0.438648										0.42479	0.334608	0.711081	0.0759495	0.999273	0.693959
		0.291494	0.46993	0.245594	0.653778	0.189542	0.503501										0.52826	0.671314	0.3982	0.656213	0.798486	0.405779
		0.504207	0.297845	0.340985	0.642203	0.306113	0.268176										0.1585	0.560606	0.210036	0.0896297	0.412359	0.194169
		0.179733	0.236967	0.553253	0.153445	0.448637	0.475197										0.325756	0.4302	0.196622	0.24534	0.12865	0.841296
		0.497077	0.207376	0.114442	0.0599008	0.641307	0.831951										0.0391066	0.153305	0.365739	0.17244	0.094414	0.64363
		0.645762	0.049321	0.706457	0.162078	0.214585	0.437599										0.859081	0.0887433	0.0317608	0.252703	0.168771	0.514952
		0.330092	0.23329	0.524657	0.456683	0.022129	0.789865										0.0257898	0.427909	0.530501	0.394155	0.659823	0.319847
		0.285009	0.29089	0.0779732	0.0665134	0.286494	0.274265										0.0427956	0.295009	0.300936	0.693942	0.810303	0.530011
		0.360016	0.156795	0.370759	0.847839	0.605658	0.0362488										0.270568	0.43598	0.598157	0.544323	0.452064	0.19075
		0.755926	0.368345	0.301948	0.492833	0.571143	0.19485										0.261425	0.324861	0.493331	0.175603	0.214274	0.0564041
		0.184914	0.333129	0.739165	0.402568	0.412673	0.310654										0.520517	0.273069	0.464616	0.205774	0.283926	0.223309
		0.716784	0.73495	0.24439	0.888234	0.33155	0.631646										0.460793	0.556056	0.378519	0.31212	0.416747	0.498254
		0.686252	0.183577	0.48401	0.284607	0.270976	0.319154										0.267936	0.124564	0.297367	0.0814382	0.279204	0.270558
		0.703869	0.445575	0.12856	0.013344	0.244472	0.902367										0.356128	0.086773	0.311138	0.147306	0.673678	0.20403
		0.310828	0.779963	0.346362	0.166688	0.246416	0.478353										0.479353	0.148501	0.440182	0.535019	0.0165636	0.13763
		0.500763	0.0295221	0.325203	0.159472	0.608534	0.285623										0.445417	0.883885	0.242708	0.594964	0.734319	0.273996
		0.327154	0.232706	0.3068	0.364482	0.421048	0.610234										0.174354	0.954108	0.504299	0.182631	0.11688	0.513243
		0.531716	0.670306	0.192001	0.582237	0.171672	0.714027										0.145566	0.597339	0.0398551	0.346066	0.417474	0.679588
		0.895591	0.3464	0.235674	0.438641	0.0819465	0.496										0.514653	0.377272	0.916097	0.193558	0.389028	0.352506
		0.473273	0.372513	0.467503	0.569973	0.48025	0.800659										0.208235	0.00681484	0.678833	0.446812	0.349023	0.203647
		0.425087	0.407078	0.014452	0.241746	0.668761	0.518549										0.340931	0.830496	0.262159	0.157054	0.460025	0.133594
		0.643716	0.179295	0.295063	0.654932	0.751137	0.346928										0.352906	0.40807	0.105113	0.332933	0.261252	0.613338
		0.187902	0.587427	0.220373	0.202488	0.0177404	0.729546										0.257162	0.0209508	0.138299	0.148626	0.128404	0.393459
		0.790915	0.0209772	0.491165	0.449577	0.760162	0.882273										0.876434	0.404257	0.409605	0.602072	0.296898	0.40952
		0.432017	0.441719	0.690613	0.509228	0.722597	0.304102										0.316522	0.0325035	0.257326	0.0648894	0.206514	0.309707
		0.514865	0.713659	0.212641	0.708383	0.396237	0.306698										0.306505	0.317732	0.0986682	0.152877	0.561603	0.281329
		0.456551	0.885973	0.671267	0.620525	0.257692	0.622676										0.80388	0.680516	0.704321	0.368401	0.892825	0.324019
		0.586325	0.267703	0.621579	0.653908	0.539005	0.735722										0.423351	0.538124	0.384507	0.0268321	0.301189	0.722845
		0.672122	0.543223	0.494569	0.463178	0.502972	0.738415										0.145711	0.920343	0.286508	0.184392	0.178232	0.213183
		0.452393	0.050546	0.740906	0.192703	0.497176	0.0993118										0.398053	0.198458	0.768083	0.62801	0.345611	0.260533
		0.289618	0.530612	0.566717	0.82338	0.223566	0.225326										0.181567	0.379792	0.710331	0.148408	0.860193	0.816183
		0.405004	0.274022	0.063078	0.65006	0.646729	0.885881										0.134197	0.263249	0.335751	0.213246	0.231004	0.871244
		0.47245	0.440632	0.0390957	0.488461	0.178896	0.669108										0.676368	0.298295	0.390162	0.111319	0.321831	0.564677
		0.202084	0.191131	0.221065	0.658039	0.60888	0.0190604										0.0217415	0.210609	0.279478	0.651943	0.815955	0.142499
		0.899604	0.0399401	0.730969	0.187005	0.758708	0.413425										0.0760599	0.231358	0.33123	0.287152	0.301561	0.240935
		0.423647	0.326094	0.820809	0.355863	0.411579	0.926873										0.642375	0.401893	0.128116	0.545943	0.0981787	0.2337
		0.19906	0.4161	0.373179	0.855073	0.257696	0.639224										0.364805	0.212031	0.05854	0.651568	0.406383	0.75865
		0.442194	0.189117	0.508012	0.0623671	0.835415	0.389364										0.731332	0.0808348	0.327547	0.378316	0.498818	0.205222
		0.309121	0.350953	0.0869472	0.587477	0.392469	0.0756524										0.248892	0.488888	0.321668	0.146794	0.289968	0.672916
		0.29284	0.511491	0.145678	0.277678	0.310473	0.354847										0.837444	0.199025	0.586112	0.0309879	0.325917	0.8536
		0.145403	0.222438	0.640703	0.345906	0.653233	0.683449										0.017578	0.472606	0.232923	0.416462	0.524999	0.118588
		0.238045	0.217883	0.733293	0.828207	0.994913	0.455793										0.277079	0.556341	0.153149	0.651248	0.115448	0.070084
		0.116861	0.206078	0.27484	0.676611	0.314028	0.618398										0.688438	0.166505	0.273301	0.125225	0.359378	0.346635
		0.755688	0.33402	0.351204	0.384709	0.411371	0.482403										0.511695	0.598627	0.736232	0.355242	0.702987	0.139639
		0.562643	0.239924	0.12988	0.501196	0.629837	0.53625										0.342936	0.0484816	0.0427163	0.228749	0.641297	0.343988
		0.237974	0.359633	0.709721	0.114712	0.794071	0.583686										0.36239	0.762408	0.347604	0.257855	0.36502	0.542376
		0.77196	0.84283	0.575471	0.183653	0.446057	0.219796										0.908044	0.555587	0.0903645	0.238812	0.618498	0.810481
		0.738732	0.267438	0.547304	0.919526	0.274812	0.318457										0.140766	0.414978	0.0771717	0.397971	0.364354	0.518985
		0.824012	0.472903	0.314366	0.43186	0.563301	0.0379775										0.0599007	0.486217	0.0264114	0.304212	0.233379	0.518129
		0.0648493	0.342852	0.0993408	0.0711536	0.250446	0.235628										0.230979	0.325161	0.661866	0.306583	0.617846	0.625081
		0.528025	0.310407	0.255444	0.501104	0.850511	0.450137										0.266429	0.659834	0.161077	0.550291	0.764538	0.078604
		0.441431	0.527228	0.526913	0.11909	0.653553	0.233097										0.687991	0.323214	0.406986	0.128261	0.261714	0.793543
		0.509232	0.697664	0.141761	0.713752	0.429424	0.197036										0.649355	0.284008	0.905759	0.386227	0.554204	0.222713
		0.628303	0.603044	0.518431	0.815825	0.846517	0.427096										0.400016	0.725208	0.216901	0.425463	0.3859	0.329097
		0.635866	0.755362	0.300867	0.186277	0.295358	0.341521										0.107238	0.818712	0.490594	0.551879	0.431444	0.259807
		0.212802	0.43414	0.672973	0.371746	0.817167	0.491527										0.872787	0.35106	0.252796	0.443659	0.489202	0.379701
		0.410784	0.364049	0.704581	0.0262571	0.735357	0.48436										0.30891	0.458772	0.284616	0.291199	0.31067	0.0760761
		0.633601	0.856323	0.517041	0.322607	0.153967	0.153741										0.384467	0.227223	0.707599	0.674111	0.227038	0.418708
		0.0373094	0.300734	0.482001	0.390047	0.696276	0.450765										0.746902	0.464771	0.574653	0.420218	0.381514	0.374152
		0.529577	0.134944	0.656014	0.644052	0.483702	0.333001										0.674682	0.655711	0.635803	0.203947	0.569842	0.443137
		0.76922	0.724396	0.796961	0.423842	0.268611	0.488293										0.491645	0.256919	0.606923	0.330675	0.160836	0.0170767
		0.202869	0.503675	0.61696	0.762831	0.14185	0.456418										0.185856	0.267976	0.38337	0.530983	0.399084	0.191686
		0.25969	0.199739	0.0268604	0.445761	0.219886	0.707995										0.318218	0.362697	0.436791	0.0444646	0.564084	0.28386
		0.241319	0.41113	0.787317	0.477517	0.323238	0.0264781										0.875344	0.183054	0.634793	0.323654	0.0403802	0.313965
		0.720798	0.0507598	0.249049	0.500661	0.114033	0.15484										0.375338	0.0404312	0.266383	0.313443	0.116878	0.564812
		0.198591	0.187041	0.385016	0.398659	0.138838	0.688789										0.357609	0.548587	0.196291	0.591914	0.184784	0.451616
		0.573064	0.509045	0.36441	0.322915	0.171741	0.0390075										0.515053	0.0880223	0.529765	0.536805	0.444721	0.89523
		0.768852	0.0137338	0.0332832	0.14032	0.426352	0.727806										0.501742	0.415903	0.16219	0.244787	0.339764	0.345605
		0.213518	0.13957	0.353077	0.215125	0.233147	0.660804										0.504902	0.212792	0.0349979	0.283311	0.213601	0.43447
		0.223971	0.104253	0.947517	0.630704	0.514461	0.246174										0.332057	0.703068	0.097565	0.488258	0.545263	0.575498
		0.589838	0.455974	0.422333	0.779714	0.36628	0.748265										0.20475	0.432744	0.615447	0.335973	0.374053	0.12839
		0.165478	0.27481	0.261238	0.697225	0.533698	0.0980643										0.532903	0.301582	0.267041	0.450271	0.333482	0.377452
		0.172764	0.302008	0.418523	0.441158	0.207742	0.256078										0.270877	0.222836	0.258677	0.51162	0.440311	0.0505406
		0.606866	0.122824	0.300943	0.217931	0.162967	0.551213										0.70564	0.132572	0.462859	0.65935	0.427325	0.381358
		0.593354	0.0658763	0.715043	0.487808	0.450623	0.314371										0.393913	0.355773	0.428403	0.12125	0.346534	0.322089
		0.469791	0.200598	0.238215	0.380214	0.59633	0.792247										0.132531	0.730543	0.102201	0.75274	0.681307	0.164959
		0.35694	0.2614	0.147363	0.49444	0.496347	0.238902										0.291531	0.425977	0.155593	0.390594	0.573909	0.332468
		0.321467	0.208933	0.473734	0.904027	0.813031	0.680995										0.372393	0.349807	0.172434	0.317706	0.407126	0.143839
		0.85698	0.532411	0.665074	0.385718	0.559859	0.712259										0.0845552	0.292996	0.995782	0.211419	0.721208	0.374701
		0.798948	0.52073	0.389	0.366216	0.136439	0.752843										0.613866	0.347273	0.551144	0.52119	0.455484	0.326226
		0.312363	0.317893	0.896602	0.146799	0.403846	0.499371										0.129792	0.561012	0.438616	0.310552	0.0218214	0.105084
		0.341706	0.694023	0.203991	0.243028	0.201583	0.868369										0.612468	0.4335	0.499786	0.43533	0.498886	0.219059
		0.105547	0.145434	0.609674	0.597719	0.547175	0.544434										0.30826	0.60284	0.445216	0.440624	0.585462	0.111954
		0.208042	0.386192	0.635263	0.342777	0.871476	0.639496										0.185068	0.0207518	0.715887	0.90705	0.566527	0.97343
		0.724264	0.438645	0.513388	0.778839	0.378072	0.32004										0.49048	0.868105	0.460721	0.969331	0.00698831	0.314641
		0.049683	0.493217	0.506615	0.700271	0.180569	0.365017										0.88244	0.490838	0.218964	0.245404	0.911247	0.0504469
		0.35728	0.658411	0.563314	0.314706	0.429354	0.372985										0.0766089	0.55212	0.75379	0.150031	0.248265	0.0296593
		0.653188	0.850792	0.489096	0.524505	0.790527	0.269263										0.508061	0.364949	0.14301	0.0981765	0.807539	0.317011
		0.254498	0.781892	0.342849	0.465978	0.195807	0.786564										0.109344	0.177796	0.352335	0.32945	0.277798	0.0746175
		0.506396	0.436354	0.426638	0.175996	0.315686	0.213897										0.726444	0.511065	0.167493	0.395378	0.254933	0.0748863
		0.503017	0.417064	0.547656	0.653873	0.713586	0.799398										0.430282	0.641499	0.368738	0.516966	0.295948	0.402562
		0.406152	0.649213	0.243508	0.817933	0.215989	0.623165										0.265908	0.348489	0.177489	0.397813	0.321051	0.446385
		0.223578	0.5093	0.253843	0.191183	0.647394	0.648706										0.252271	0.153465	0.421593	0.209465	0.248524	0.182197
		0.317933	0.344633	0.558405	0.592125	0.621163	0.50814										0.0193191	0.219237	0.588759	0.643979	0.176528	0.540399
		0.17579	0.503811	0.89605	0.133151	0.217822	0.588052										0.685034	0.804665	0.643139	0.464964	0.631474	0.161669
		0.807239	0.131206	0.390553	0.65448	0.732071	0.399996										0.932247	0.321804	0.238893	0.212201	0.338858	0.460797
		0.0514125	0.681216	0.751915	0.415443	0.221046	0.0854478										0.310507	0.049772	0.537361	0.241491	0.111608	0.420939
		0.884885	0.149827	0.527872	0.925141	0.713997	0.383472										0.0982398	0.589727	0.169356	0.925747	0.0356179	0.451877
		0.934456	0.184047	0.0250383	0.219579	0.830505	0.818117										0.156326	0.391397	0.682596	0.373687	0.616316	0.215699
		0.624415	0.375991	0.584677	0.300603	0.188487	0.471213										0.276313	0.361277	0.756111	0.274457	0.290931	0.252476
		0.187421	0.312438	0.210928	0.157671	0.65279	0.698584										0.753535	0.0436639	0.16576	0.44859	0.338656	0.241423
		0.597649	0.639098	0.34044	0.684002	0.447374	0.417757										0.691685	0.523673	0.514782	0.264175	0.0165821	0.248505
		0.0483134	0.68912	0.620243	0.594281	0.910751	0.796995										0.223334	0.0293763	0.315928	0.252536	0.370834	0.56884
		0.685288	0.460652	0.598375	0.770429	0.735411	0.589808										0.907666	0.280672	0.410063	0.250677	0.455814	0.165678
		0.391367	0.601576	0.503261	0.289064	0.349928	0.792497										0.158233	0.70385	0.516522	0.513672	0.3136	0.268527
		0.227649	0.40978	0.415879	0.989379	0.359328	0.710631										0.488017	0.515582	0.550274	0.367524	0.0464208	0.339449
		0.417734	0.193916	0.451805	0.483843	0.753513	0.500274										0.767696	0.575229	0.24509	0.671553	0.142197	0.0588136
		0.396645	0.748148	0.369763	0.304062	0.412996	0.194963										0.656704	0.139229	0.727681	0.0914492	0.868823	0.524055
		0.36452	0.664359	0.085051	0.737397	0.328857	0.182691										0.41221	0.213946	0.0879533	0.109636	0.255359	0.0781726
		0.379273	0.107438	0.340112	0.679902	0.440178	0.0535789										0.702685	0.610672	0.587188	0.355378	0.557322	0.227628
		0.4372	0.441546	0.430259	0.756324	0.259215	0.620785										0.623961	0.431609	0.273417	0.758802	0.434226	0.481478
		0.318444	0.312696	0.371789	0.151759	0.21302	0.794551										0.680445	0.194537	0.28824	0.369796	0.38342	0.281001
		0.271705	0.44424	0.630352	0.231159	0.519517	0.112959										0.0499347	0.377242	0.714668	0.433542	0.411417	0.157063
		0.587784	0.434111	0.496919	0.179784	0.787857	0.592803										0.154407	0.450585	0.485833	0.474763	0.739006	0.483182
		0.577922	0.249917	0.729317	0.586252	0.642807	0.328115										0.81954	0.736036	0.392471	0.504283	0.115227	0.224521
		0.210414	0.142645	0.365633	0.188958	0.258532	0.212863										0.183759	0.801861	0.221911	0.577766	0.544855	0.169162
		0.490095	0.165625	0.376711	0.594804	0.361561	0.878127										0.536403	0.601999	0.962272	0.501507	0.458668	0.0357181
		0.722084	0.143384	0.185192	0.203966	0.0918605	0.458103										0.182377	0.749056	0.504553	0.274617	0.277579	0.344333
		0.903142	0.351842	0.0204232	0.40745	0.634107	0.841335										0.215293	0.829957	0.343579	0.528691	0.96707	0.528342
		0.687057	0.582894	0.793926	0.0922885	0.999691	0.542991										0.538669	0.0396312	0.24889	0.729833	0.713889	0.618312
		0.100879	0.200683	0.68897	0.476458	0.814853	0.240707										0.52431	0.910751	0.763152	0.184636	0.484779
		0.281899	0.0372721	0.359461	0.405158	0.118179	0.0379334										0.121967	0.79864	0.403546	0.381586	0.279006
		0.272131	0.255402	0.696532	0.895419	0.382649	0.393497										0.533575	0.207632	0.195816	0.442641	0.474912
		0.327428	0.183018	0.0112793	0.426777	0.639989	0.244243										0.569836	0.399166	0.148742	0.475994	0.508839
		0.358708	0.250086	0.0336397	0.7247	0.369041	0.0245639										0.646391	0.134633	0.192728	0.258843	0.452082
		0.287302	0.456778	0.347655	0.623319	0.449935	0.36736										0.46061	0.695453	0.325448	0.39258	0.211871
		0.592316	0.8185	0.238652	0.819271	0.654981	0.792491										0.522398	0.136985	0.231168	0.577497	0.52814
		0.676329	0.463426	0.620605	0.694072	0.488751	0.574381										0.830635	0.375869	0.253313	0.560202	0.690558
		0.204059	0.221018	0.411045	0.37852	0.12145	0.0716196										0.348636	0.296402	0.107118	0.744311	0.0789357
		0.0798938	0.229208	0.714462	0.422241	0.802761	0.973497										0.942138	0.587965	0.73795	0.293303	0.434827
		0.0800137	0.354434	0.45456	0.443224	0.686376	0.0758414										0.369469	0.272772	0.0383223	0.773174	0.7026
		0.403627	0.293496	0.425025	0.323318	0.395863	0.233618										0.551865	0.483583	0.373104	0.412382	0.892238
		0.804172	0.0486829	0.553779	0.322608	0.179514	0.648134										0.231673	0.693117	0.847921	0.285134	0.379278
		0.887014	0.410372	0.487504	0.588795	0.425001	0.543793										0.241629	0.367546	0.242059	0.587502	0.249847
		0.225058	0.542823	0.564286	0.282651	0.655272	0.205213										0.579981	0.451756	0.333749	0.155924	0.882029
		0.44213	0.453665	0.529814	0.739425	0.421518	0.380889										0.098543	0.114425	0.322028	0.544685
		0.731534	0.297765	0.372872	0.402642	0.329203	0.910321										0.83626	0.305561	0.568459	0.400673
		0.917123	0.22492	0.265368	0.845638	0.80166	0.383079										0.384137	0.354736	0.0681759	0.499551
		0.625782	0.722381	0.59381	0.354936	0.491005	0.466022										0.950972	0.333262	0.351833	0.219408
		0.475494	0.207612	0.161467	0.567198	0.640566	0.851002										0.365637	0.133731	0.355604	0.607497
		0.641223	0.0220875	0.514499	0.546361	0.364364	0.87631										0.480722	0.50911	0.268389	0.552914
		0.431903	0.374049	0.193338	0.775163	0.325495	0.58351										0.65373	0.603278	0.528524	0.398683
		0.71381	0.429682	0.641031	0.17367	0.834753	0.702311										0.0309693	0.457546	0.0825734	0.806902
		0.0192636	0.251278	0.262101	0.388154	0.19233	0.747677										0.312203	0.359179	0.995992	0.147123
		0.472882	0.200084	0.565935	0.889935	0.381081	0.370697										0.196681	0.706667	0.10409	0.884228
		0.369788	0.0198429	0.687338	0.0464663	0.591632	0.803443										0.840283	0.623827	0.118088	0.198308
		0.378509	0.0856581	0.957485	0.496618	0.314705	0.381198										0.65667	0.297412	0.810093	0.312969
		0.0803648	0.474216	0.19499	0.492867	0.316316	0.657454										0.169137	0.056292	0.3895	0.112268
		0.375687	0.0185652	0.606445	0.611072	0.680297	0.698843										0.424269	0.141697	0.262013	0.590151
		0.023556	0.289353	0.34573	0.337828	0.00852145	0.829381										0.428022	0.310788	0.520517	0.292849
		0.18707	0.415544	0.184608	0.540629	0.64152	0.225225										0.102467	0.251501	0.479443	0.269139
		0.650628	0.516019	0.522667	0.162972	0.824742	0.720119										0.115049	0.549372	0.144218	0.202248
		0.487064	0.671261	0.833086	0.409698	0.641174	0.68744										0.457012	0.555004	0.377512	0.275167
		0.110057	0.382031	0.784217	0.349347	0.469335	0.292271										0.319405	0.125253	0.813463	0.431849
		0.240826	0.111348	0.45842	0.572039	0.235066	0.528965										0.0900354	0.419077	0.470953	0.165203
		0.53403	0.327029	0.478891	0.272965	0.363354	0.595894										0.259095	0.502836	0.237156	0.28911
		0.60912	0.131767	0.441411	0.894807	0.729024	0.267241										0.0347563	0.300643	0.609803	0.419758
		0.367764	0.240611	0.841696	0.35533	0.00946248	0.297251										0.401026	0.439263	0.202976	0.505755
		0.326193	0.265482	0.00416329	0.466267	0.876872	0.407243										0.486055	0.337637	0.110965	0.363488
		0.557168	0.37407	0.642014	0.286386	0.766668	0.623469										0.370364	0.537634	0.383017	0.292549
		0.280351	0.821272	0.699124	0.563645	0.971438	0.468226										0.719432	0.152856	0.347375	0.30345
		0.269511	0.392095	0.0479978	0.378584	0.353606	0.595539										0.744913	0.698707	0.109297	0.171614
		0.287832	0.568812	0.100998	0.209969	0.524799	0.220559										0.0257625	0.282257	0.516356	0.0493336
		0.324352	0.385932	0.792711	0.222268	0.548958	0.818151										0.739525	0.47989	0.490726	0.247776
		0.226358	0.535174	0.252647	0.760749	0.365078	0.152039										0.277962	0.458254	0.617803	0.830213
		0.0241392	0.312143	0.125275	0.227101	0.437525	0.682658										0.244138	0.385983	0.110097	0.0489127
		0.231703	0.548904	0.140695	0.755268	0.0297709	0.804703										0.346746	0.402793	0.278191	0.222218
		0.357899	0.599557	0.605887	0.99134	0.36106	0.24145										0.58172	0.276269	0.259832	0.744222
		0.364304	0.219476	0.264494	0.377749	0.895076	0.560636										0.392155	0.113588	0.807	0.382079
		0.339332	0.290739	0.77767	0.293172	0.65087	0.228225										0.892921	0.435734	0.834664	0.200135
		0.0727864	0.630646	0.29439	0.49705	0.434512	0.169105										0.388026	0.266356	0.792465	0.246539
		0.771075	0.951301	0.756773	0.436806	0.215585	0.0341381										0.553668	0.293115	0.026268	0.0292255
		0.357544	0.298044	0.060079	0.630354	0.728072	0.80658										0.0365317	0.135717	0.350102	0.393516
		0.964583	0.1117	0.521568	0.356748	0.396383	0.770313										0.808017	0.161796	0.261279	0.0536722
		0.892667	0.345861	0.585026	0.538055	0.703268	0.910932										0.0485664	0.279256	0.964215	0.959451
		0.299278	0.645019	0.195718	0.313247	0.878667	0.593065										0.456297	0.949451	0.415501	0.666932
		0.748674	0.532919	0.513083	0.0838352	0.986234	0.593098										0.378861	0.255732	0.316537	0.265169
		0.427359	0.0608392	0.723217	0.285136	0.584207	0.294681										0.813514	0.530891	0.903477	0.407383
		0.136568	0.915175	0.349814	0.581133	0.462098	0.799296										0.430174	0.228768	0.377166	0.265827
		0.283883	0.680432	0.090078	0.329158	0.84368	0.570666										0.69415	0.157867	0.216183	0.609471
		0.463814	0.519808	0.225535	0.915643	0.204095	0.912213										0.556491	0.519772	0.328692	0.0775062
		0.580567	0.470281	0.251903	0.222089	0.290931	0.402517										0.46107	0.350794	0.0247418	0.451752
		0.29264	0.323962	0.541575	0.356651	0.588242	0.856152										0.0163049	0.78572	0.361287	0.0149699
		0.366855	0.218226	0.628595	0.346863	0.943877	0.0341435										0.576048	0.558708	0.169915	0.439984
		0.452497	0.334659	0.407404	0.302553	0.898637	0.607403										0.303679	0.454966	0.222851	0.630854
		0.271762	0.277989	0.198149	0.685322	0.638033	0.339963										0.75806	0.807315	0.14281	0.652715
		0.328717	0.348394	0.722172	0.112491	0.243735	0.183579										0.391379	0.790523	0.318235	0.0388058
		0.608196	0.260712	0.318044	0.194665	0.893571	0.223617										0.372617	0.0776621	0.332412	0.531184
		0.742321	0.272096	0.711391	0.308152	0.418851	0.435369										0.343092	0.0117602	0.260397	0.534256
		0.601445	0.540417	0.787525	0.260939	0.908144	0.333274										0.661218	0.942812	0.114518	0.563608
		0.497232	0.301556	0.149097	0.122454	0.564445	0.489354										0.0637204	0.0239614	0.0408797	0.346366
		0.798431	0.528644	0.181525	0.362467	0.547652	0.399683										0.407921	0.327333	0.362031	0.330079
		0.597479	0.206992	0.670066	0.364832	0.50715	0.29998										0.0494623	0.351337	0.0849795	0.385095
		0.929116	0.177613	0.693228	0.882807	0.318232	0.644548										0.821757	0.201262	0.223864	0.933344
		0.254726	0.0219899	0.715696	0.405448	0.547722	0.805908										0.826202	0.288647	0.849661	0.335907
		0.0391249	0.587323	0.374189	0.185562	0.58205	0.257327										0.76182	0.280721	0.403915	0.198601
		0.700451	0.517119	0.849071	0.468692	0.537133	0.465991										0.142948	0.158784	0.503152	0.241477
		0.22547	0.412774	0.912095	0.5055	0.157122	0.461628										0.484589	0.290774	0.789134	0.622748
		0.895152	0.229565	0.160512	0.36468	0.0243721	0.491942										0.28625	0.615145	0.223189	0.665825
		0.584293	0.26659	0.195675	0.270773	0.60555	0.424081										0.206247	0.375415	0.0497489	0.443333
		0.658185	0.0500064	0.426683	0.254727	0.419757	0.269606										0.20716	0.421198	0.186113	0.314801
		0.297655	0.365512	0.367976	0.98815	0.134699	0.794218										0.580848	0.698703	0.38072	0.645165
		0.475646	0.256097	0.220678	0.547132	0.326108	0.204222										0.0808214	0.178679	0.20916	0.653657
		0.0932814	0.322978	0.277639	0.200699	0.367053	0.71895										0.0396075	0.20975	0.114621	0.230825
		0.389909	0.479159	0.212492	0.592088	0.238681	0.696496										0.88247	0.911487	0.151174	0.641568
		0.660536	0.43246	0.447415	0.0248409	0.0195077	0.20948										0.132573	0.11699	0.666963	0.0620163
		0.195587	0.784929	0.276748	0.200271	0.481051	0.300233										0.263035	0.423504	0.275004	0.351021
		0.764323	0.133527	0.6373	0.295223	0.434072	0.881662										0.883519	0.22494	0.553026	0.225078
		0.835931	0.287389	0.910264	0.696826	0.516081	0.638027										0.326465	0.407086	0.0328907	0.229652
		0.156091	0.674348	0.181194	0.539208	0.881823	0.895449										0.160893	0.781368	0.351055	0.489842
		0.215538	0.437725	0.434189	0.646509	0.266384	0.888804										0.416967	0.131525	0.589991	0.15492
		0.498742	0.130502	0.849394	0.348486	0.22993	0.659752										0.614439	0.135731	0.3185	0.090307
		0.391825	0.407708	0.794882	0.696377	0.222926	0.0285329										0.156314	0.291351	0.274944	0.0222485
		0.758804	0.748317	0.558718	0.0138666	0.664985	0.0650466										0.438905	0.510561	0.239733	0.238898
		0.160513	0.073907	0.295295	0.215138	0.232411	0.226483										0.401082	0.197593	0.869205	0.374281
		0.689267	0.366332	0.334093	0.770117	0.885808	0.612595										0.116073	0.181309	0.21027	0.470719
		0.204913	0.754478	0.62232	0.465658	0.699412	0.210475										0.668632	0.714466	0.380383	0.314852
		0.927342	0.396863	0.26038	0.999524	0.0768842	0.764339										0.619162	0.578819	0.346513	0.377147
		0.089757	0.734408	0.357839	0.521506	0.707699	0.915359										0.135832	0.389279	0.602474	0.222268
		0.445509	0.064517	0.175247	0.715788	0.331585	0.938704										0.727625	0.485978	0.128825	0.294552
		0.142616	0.647971	0.399626	0.852491	0.413543	0.550618										0.0365027	0.697854	0.408921	0.310963
		0.743929	0.567458	0.201087	0.348516	0.0525047	0.477981										0.528859	0.0261918	0.416505	0.0656854
		0.265452	0.0618667	0.607381	0.634812	0.475649	0.448125										0.603313	0.405313	0.541894	0.166084
		0.332209	0.594515	0.351099	0.629686	0.182442	0.459027										0.0488332	0.490245	0.645913	0.0108586
		0.673502	0.246754	0.636768	0.415475	0.412709	0.69813										0.370779	0.0723427	0.392893	0.273158
		0.0598478	0.441809	0.676898	0.359101	0.824988	0.694487										0.451157	0.298733	0.519783	0.59726
		0.330897	0.413376	0.0117033	0.65159	0.668127	0.2977										0.0306706	0.0931785	0.154999	0.453719
		0.259462	0.355057	0.204637	0.274028	0.0236748	0.61167										0.242828	0.313245	0.100465	0.358243
		0.0628152	0.0564196	0.185615	0.493593	0.663478	0.477994										0.267603	0.223767	0.185237	0.232133
		0.204975	0.982941	0.510217	0.374928	0.0215614	0.707694										0.139318	0.465818	0.68587	0.390246
		0.418544	0.5777	0.595538	0.557897	0.687923	0.693856										0.408451	0.60499	0.588919	0.228913
		0.158368	0.18172	0.594206	0.308684	0.226795	0.470458										0.475673	0.227942	0.203574	0.311205
		0.277966	0.321075	0.515609	0.188829	0.275528	0.314628										0.638214	0.341949	0.620974	0.573742
		0.249973	0.053	0.655669	0.94076	0.843968	0.55519										0.797826	0.347281	0.45109	0.41314
		0.295441	0.612378	0.901072	0.660045	0.22904	0.794668										0.303948	0.365218	0.812686	0.515543
		0.799975	0.0652282	0.834483	0.284687	0.613979	0.105404										0.459903	0.323913	0.328048	0.454014
		0.336974	0.318561	0.332149	0.200973	0.34642	0.548859										0.262099	0.577979	0.237658	0.276459
		0.946608	0.253205	0.161118	0.6436	0.462488	0.430437										0.114035	0.473275	0.492857	0.437204
		0.430444	0.128822	0.438177	0.204259	0.782545	0.245307										0.217554	0.0937672	0.487882	0.320545
		0.443074	0.253069	0.79501	0.137042	0.25917	0.613917										0.31261	0.259333	0.761308	0.06811
		0.633752	0.216832	0.337455	0.448647	0.254675	0.355501										0.720366	0.263764	0.244044	0.858389
		0.585833	0.355249	0.367947	0.343253	0.515176	0.459872										0.495968	0.503898	0.251642	0.483378
		0.636081	0.321242	0.382492	0.0628563	0.0817896	0.0606181										0.513479	0.131966	0.778505	0.00511529
		0.267351	0.17977	0.0613437	0.516275	0.385491	0.388743										0.235273	0.300304	0.930204	0.344741
		0.0783916	0.173851	0.257895	0.522006	0.820174	0.859946										0.607953	0.668611	0.31662	0.709332
		0.237115	0.674144	0.313303	0.391119	0.422078	0.0670311										0.270229	0.274583	0.64299	0.262573
		0.231572	0.777386	0.560327	0.0113204	0.226919	0.328294										0.402432	0.191393	0.559299	0.577991
		0.866157	0.470087	0.338193	0.342269	0.566739	0.201296										0.795104	0.221371	0.836042	0.376496
		0.521844	0.288414	0.446138	0.789337	0.188756	0.103405										0.253271	0.245728	0.238789	0.170909
		0.274332	0.572576	0.58857	0.207521	0.234801	0.696764										0.684355	0.244611	0.867019	0.328195
		0.877248	0.503615	0.423934	0.29703	0.194069	0.777788										0.510882	0.69918	0.0270772	0.790348
		0.152367	0.121025	0.51863	0.980284	0.348618	0.729728										0.824366	0.0694677	0.290565	0.422999
		0.19933	0.330255	0.436292	0.231014	0.354847	0.514222										0.378318	0.312208	0.831718	0.177788
		0.10588	0.23756	0.900558	0.943386	0.293398	0.129118										0.383436	0.792619	0.550401	0.288411
		0.280761	0.104458	0.15297	0.338366	0.471002	0.309818										0.20799	0.362651	0.220955	0.337368
		0.283725	0.742671	0.397737	0.537285	0.0919879	0.481552										0.508187	0.184909	0.608175	0.664136
		0.461144	0.313674	0.725551	0.361318	0.535815	0.790481										0.93126	0.529263	0.18889	0.164366
		0.261641	0.343274	0.371336	0.749004	0.238065	0.502019										0.667186	0.815154	0.319707	0.391137
		0.328283	0.316884	0.0237167	0.813726	0.476448	0.508998										0.931745	0.651878	0.11441	0.0541857
		0.59653	0.888865	0.39295	0.271172	0.411793	0.326375										0.493127	0.310509	0.7948	0.783975
		0.426132	0.785996	0.463742	0.759716	0.80098	0.349265										0.277539	0.263505	0.395049	0.34664
		0.495941	0.643348	0.238234	0.454901	0.293294	0.796751										0.154877	0.35271	0.281868	0.458765
		0.275308	0.152774	0.747042	0.543117	0.0955624	0.277836										0.309353	0.526441	0.414712	0.893516
		0.48974	0.417369	0.338264	0.0326656	0.519038	0.601772										0.21521	0.185428	0.822704	0.802459
		0.18171	0.0295702	0.0333172	0.153987	0.580555	0.308689										0.798317	0.388157	0.277874	0.32587
		0.828026	0.273388	0.437986	0.489022	0.221591	0.7261										0.547273	0.259083	0.912686	0.33993
		0.386551	0.341741	0.326153	0.743269	0.517346	0.0734575										0.608692	0.380496	0.402972	0.194765
		0.612173	0.437518	0.680214	0.41335	0.295009	0.739279										0.811333	0.319554	0.213781	0.201765
		0.540275	0.298391	0.776603	0.225865	0.64988	0.40964										0.547184	0.303159	0.0820655	0.331355
		0.425266	0.172395	0.285333	0.500697	0.732026	0.775836										0.36516	0.274592	0.91522	0.218097
		0.563071	0.568007	0.157329	0.481764	0.252028	0.0441115										0.472705	0.836678	0.554892	0.482313
		0.260953	0.10056	0.247499	0.455325	0.0899281	0.303154										0.237551	0.364321	0.482644	0.587106
		0.350338	0.234235	0.34732	0.75776	0.669391	0.540485										0.761399	0.387055	0.0511419	0.603657
		0.239446	0.459563	0.229678	0.40978	0.303356	0.725135										0.245623	0.485222	0.295559	0.0284574
		0.338011	0.257202	0.666141	0.52245	0.436354	0.802454										0.208845	0.133995	0.39417
		0.497209	0.202647	0.0151076	0.698404	0.784537	0.398771										0.696165	0.592906	0.355001
		0.104469	0.277335	0.419106	0.154887	0.44208	0.220542										0.930464	0.515658	0.52704
		0.088261	0.0447232	0.753238	0.371198	0.230288	0.582909										0.187783	0.242703	0.346659
		0.292192	0.145473	0.248596	0.917599	0.293842	0.337605										0.0782331	0.422729	0.256072
		0.92455	0.486657	0.467307	0.441621	0.500587	0.919163										0.807558	0.717394	0.538475
		0.402097	0.309671	0.675303	0.710469	0.239244	0.524033										0.323308	0.286998	0.647704
		0.674667	0.337044	0.342502	0.578007	0.853039	0.480815										0.296175	0.772149	0.251812
		0.848442	0.4118	0.0206974	0.320736	0.759687	0.48215										0.502322	0.594326	0.327127
		0.399278	0.0676653	0.238559	0.276816	0.583042	0.268721										0.502629	0.4947	0.259945
		0.241845	0.720893	0.231602	0.415117	0.272252	0.201417										0.0264758	0.470078	0.719333
		0.931461	0.682516	0.454679	0.561663	0.796659	0.354212										0.882256	0.0687931	0.636679
		0.471612	0.662003	0.41632	0.93879	0.357454	0.809461										0.235878	0.0276669	0.147801
		0.712383	0.413579	0.308817	0.351096	0.480425	0.331635										0.561205	0.336122	0.91018
		0.486686	0.137552	0.232577	0.446047	0.591065	0.519268										0.0734282	0.480715	0.595519
		0.362516	0.176217	0.367078	0.532417	0.451298	0.82279										0.202189	0.140046	0.683401
		0.484378	0.755558	0.503287	0.466398	0.711395	0.312863										0.14958	0.350418	0.278394
		0.0417147	0.0259044	0.45727	0.522244	0.548956	0.446461										0.588476	0.0761555	0.183491
		0.632965	0.0577173	0.688742	0.608667	0.192497	0.499313										0.322205	0.376415	0.235498
		0.270838	0.654023	0.44519	0.176561	0.552677	0.721266										0.545505	0.431008	0.0197741
		0.178912	0.352747	0.515958	0.547953	0.500291	0.243366										0.940388	0.40801	0.315409
		0.786763	0.679709	0.166046	0.558084	0.315275	0.639593										0.63131	0.344355	0.477168
		0.369417	0.0723002	0.195936	0.329397	0.448065	0.248717										0.304521	0.549871	0.0482793
		0.906433	0.369521	0.433635	0.922054	0.213916	0.823163										0.01945	0.122989	0.628011
		0.0395146	0.446959	0.0985633	0.836169	0.153032	0.145174										0.556194	0.869356	0.530184
		0.235727	0.244553	0.354955	0.402792	0.778774	0.471952										0.273927	0.168959	0.3707
		0.394314	0.75039	0.312829	0.526518	0.479191	0.746373										0.124158	0.52615	0.191485
		0.118852	0.296914	0.178768	0.860387	0.192238	0.357183										0.357082	0.362147	0.0941643
		0.85944	0.412395	0.517749	0.308843	0.114122	0.437823										0.736249	0.234973	0.237824
		0.879916	0.573396	0.360291	0.571984	0.520857	0.419019										0.560822	0.189744	0.0275364
		0.321507	0.756304	0.381767	0.781068	0.41493	0.119432										0.181944	0.106277	0.652239
		0.422371	0.421638	0.0439788	0.285301	0.306079	0.0601604										0.425605	0.39464	0.358694
		0.312321	0.431463	0.520977	0.309698	0.26318	0.254304										0.22515	0.289175	0.802553
		0.204513	0.321145	0.337933	0.972646	0.435101	0.396083										0.83243	0.201794	0.741636
		0.448506	0.300054	0.28572	0.645317	0.257021	0.345615										0.295071	0.504771	0.80035
		0.505683	0.377246	0.167872	0.844428	0.633037	0.83266										0.171883	0.0838424	0.129748
		0.228612	0.70444	0.296736	0.793286	0.463612	0.693593										0.201188	0.404209	0.0751786
		0.12151	0.679427	0.450572	0.582107	0.405461	0.873757										0.261916	0.223951	0.0660459
		0.210656	0.25994	0.156922	0.125697	0.163872	0.554449										0.502599	0.213942	0.333721
		0.454975	0.189885	0.416613	0.966721	0.604299	0.466678										0.531031	0.620306	0.369612
		0.0604794	0.0124169	0.241646	0.564019	0.417067	0.284352										0.0883497	0.566217	0.176578
		0.626878	0.461958	0.802556	0.311355	0.391329	0.699647										0.549409	0.917768	0.0672791
		0.858409	0.188814	0.307549	0.648203	0.549753	0.603374										0.117189	0.391869	0.225382
		0.320496	0.77725	0.59681	0.502439	0.614944	0.59689										0.216557	0.0211629	0.547645
		0.680398	0.337067	0.282896	0.342725	0.627364	0.51062										0.897736	0.423285	0.429533
		0.391446	0.160779	0.314572	0.241392	0.106895	0.761197										0.439097	0.292758	0.456284
		0.41794	0.2646	0.201818	0.522627	0.443647	0.572793										0.985234	0.348574	0.232072
		0.261576	0.697594	0.423126	0.899655	0.166944	0.417951										0.15596	0.072451	0.256552
		0.632601	0.95038	0.351049	0.614232	0.13937	0.819319										0.260464	0.964423	0.303516
		0.44965	0.372147	0.354872	0.840002	0.41829	0.333052										0.493147	0.308689	0.27013
		0.934534	0.290874	0.931818	0.767421	0.319416	0.90285										0.619795	0.329157	0.386849
		0.565593	0.269494	0.213798	0.83955	0.295877	0.427852										0.544097	0.119305	0.0474404
		0.670469	0.45801	0.683268	0.621673	0.221404	0.807454										0.917704	0.471787	0.266302
		0.494869	0.260265	0.528618	0.535011	0.461561	0.336309										0.311731	0.0694195	0.255856
		0.938545	0.207834	0.398851	0.515933	0.407355	0.337829										0.438934	0.318501	0.434353
		0.329609	0.191642	0.670962	0.323849	0.695803	0.562442										0.469765	0.30066	0.820016
		0.396152	0.324274	0.176973	0.879793	0.170322	0.429412										0.505382	0.204186	0.782022
		0.337421	0.39338	0.516894	0.493515	0.89934	0.632099										0.40482	0.618967	0.239869
		0.181522	0.339396	0.345792	0.395103	0.489733	0.348938										0.516256	0.469227	0.622604
		0.608364	0.294537	0.444859	0.715791	0.355239	0.835061										0.0530762	0.641294	0.106697
		0.209956	0.303939	0.0935755	0.706704	0.449416	0.435665										0.164881	0.814687	0.212201
		0.150623	0.211483	0.0187784	0.624115	0.553822	0.363573										0.194029	0.613281	0.0660836
		0.921587	0.0647325	0.0478377	0.201159	0.726708	0.484182										0.0269192	0.409485	0.326476
		0.576087	0.351128	0.811857	0.0443781	0.459491	0.68331										0.450802	0.245535	0.216746
		0.37584	0.234562	0.169812	0.446732	0.323859	0.530665										0.476297	0.644878
		0.195313	0.537648	0.308804	0.562974	0.146758	0.368996										0.334442	0.662577
		0.474	0.275717	0.071281	0.708548	0.972903	0.752337										0.432894	0.589204
		0.477316	0.712162	0.447927	0.365693	0.340123	0.870362										0.067453	0.734382
		0.81629	0.10688	0.541722	0.354039	0.410731	0.566755										0.236317	0.587955
		0.37301	0.321694	0.608463	0.872044	0.840272	0.921549										0.292796	0.953551
		0.274511	0.120561	0.77544	0.638934	0.264444	0.284998										0.7892	0.843078
		0.186613	0.151243	0.31804	0.26135	0.463767	0.624208										0.352716	0.393044
		0.0943061	0.573215	0.425662	0.528205	0.652342	0.821625										0.222846	0.522273
		0.368477	0.730622	0.780072	0.518579	0.972116	0.200873										0.0236143	0.727204
		0.564241	0.695877	0.414723	0.558053	0.169846	0.461344										0.119379	0.396795
		0.200981	0.363757	0.310151	0.33541	0.194604	0.751089										0.493229	0.303195
		0.527479	0.735785	0.501494	0.194054	0.117742	0.674016										0.687552	0.25277
		0.376737	0.147909	0.19486	0.368689	0.0996918	0.811519										0.342631	0.536058
		0.740011	0.151935	0.824124	0.302821	0.432179	0.895007										0.116193	0.140337
		0.837417	0.170114	0.508753	0.582334	0.648536	0.376939										0.6175	0.223344
		0.271642	0.538377	0.224098	0.423152	0.257841	0.637892										0.565585	0.30296
		0.750866	0.160639	0.195023	0.661476	0.227899	0.142258										0.279773	0.544464
		0.768256	0.130399	0.178184	0.266523	0.360924	0.504525										0.359659	0.0988501
		0.632133	0.190125	0.154763	0.219996	0.371775	0.123006										0.652416	0.754537
		0.0388474	0.226551	0.202384	0.344475	0.236708	0.957349										0.103581	0.516661
		0.0363905	0.266524	0.778137	0.506295	0.43788	0.169845										0.657632	0.542942
		0.130047	0.33202	0.801921	0.485027	0.184878	0.232579										0.894853	0.568407
		0.324461	0.404017	0.232827	0.129909	0.0209305	0.711903										0.545932	0.109527
		0.172134	0.492852	0.0563713	0.597529	0.729184	0.330191										0.516316	0.654977
		0.411285	0.385805	0.809171	0.863583	0.302627	0.256202										0.159488	0.194698
		0.444399	0.233684	0.3624	0.127495	0.232002	0.674058										0.561782	0.483759
		0.278631	0.326177	0.0175556	0.864931	0.71107	0.784644										0.314502	0.551626
		0.308954	0.202005	0.510569	0.904903	0.523555											0.38651	0.0282577
		0.039488	0.217456	0.540738	0.617383	0.358012											0.374212	0.478176
		0.915354	0.461223	0.389442	0.737204	0.237636											0.109186	0.399165
		0.220482	0.272356	0.416919	0.159425	0.944518											0.843353	0.421478
		0.11566	0.304844	0.238482	0.747792	0.596691											0.471548	0.578944
		0.0859326	0.445941	0.610904	0.567774	0.429038											0.241134	0.443012
		0.582671	0.490514	0.237379	0.463256	0.276022											0.719568	0.971647
		0.627619	0.50812	0.465495	0.505291	0.333241											0.904292	0.167087
		0.146895	0.133376	0.0719291	0.454435	0.722145											0.348135	0.101821
		0.234687	0.249391	0.495489	0.51438	0.34939											0.449249	0.17192
		0.28578	0.362543	0.0351961	0.895008	0.450105											0.732869	0.168635
		0.574731	0.734006	0.167654	0.36322	0.810158											0.453593	0.247711
		0.176266	0.649954	0.318664	0.103863	0.209787											0.597351	0.832511
		0.387784	0.163396	0.49628	0.490299	0.194821											0.197585	0.450135
		0.786131	0.437856	0.45478	0.307201	0.513252											0.638237	0.411963
		0.126387	0.476396	0.59434	0.036826	0.0978327											0.76257	0.338682
		0.0461795	0.0370557	0.467013	0.29811	0.571991											0.664509	0.15739
		0.759684	0.440878	0.331292	0.234998	0.152752											0.707937	0.251736
		0.143238	0.502975	0.0211202	0.149379	0.347212											0.824372	0.293434
		0.792701	0.0660757	0.282433	0.583717	0.515154											0.164073	0.273859
		0.553888	0.531567	0.737157	0.400282	0.208386											0.234388	0.28868
		0.894594	0.164929	0.178287	0.273087	0.44887											0.0394141	0.531569
		0.608295	0.562916	0.238404	0.853952	0.243354											0.404628	0.393594
		0.27504	0.715491	0.113168	0.142191	0.46154											0.364913	0.0358852
		0.262283	0.222785	0.38947	0.724782	0.508418											0.036875	0.528324
		0.85431	0.449133	0.256102	0.261081	0.677711											0.689811	0.52304
		0.23027	0.240544	0.503866	0.541105	0.778401											0.159864	0.201524
		0.342944	0.0600471	0.105638	0.60075	0.343263											0.146293	0.422158
		0.440556	0.174008	0.599828	0.437464	0.885103											0.73302	0.223178
		0.291899	0.805433	0.376063	0.960783	0.0220722											0.149993	0.168182
		0.0671382	0.217781	0.651231	0.664832	0.688482											0.207867	0.215008
		0.430401	0.281542	0.104002	0.780721	0.0674847											0.305597	0.0783555
		0.598919	0.19596	0.144738	0.596495	0.421473											0.652925	0.367459
		0.990187	0.898471	0.674728	0.692432	0.150088											0.854555	0.13788
		0.517282	0.592545	0.379074	0.478681	0.125913											0.661615	0.36582
		0.379251	0.492149	0.970972	0.502902	0.748812											0.22732	0.336613
		0.822062	0.317507	0.630422	0.836383	0.0950337											0.227729	0.74575
		0.210329	0.611264	0.196985	0.907487	0.684427											0.375024	0.359732
		0.788773	0.0381285	0.368941	0.362927	0.515029											0.708861	0.404382
		0.35369	0.167612	0.445143	0.412727	0.56785											0.342997	0.105473
		0.248868	0.474981	0.0351723	0.692065	0.926669											0.306361	0.0493824
		0.194488	0.417972	0.212537	0.628956	0.493992											0.877868	0.0755621
		0.670259	0.355911	0.663913	0.814543	0.854682											0.15884	0.59933
		0.584521	0.295401	0.786112	0.841946	0.199538											0.188743	0.95588
		0.288145	0.699611	0.25776	0.322013	0.443703											0.218773	0.14908
		0.276105	0.216202	0.307074	0.860479	0.734289											0.292634	0.83345
		0.482551	0.310328	0.0718894	0.790598	0.261449											0.323174	0.824298
		0.774383	0.127993	0.366229	0.428177	0.603435											0.321844	0.426587
		0.743233	0.411328	0.460382	0.267026	0.829683											0.727882	0.49676
		0.566851	0.365743	0.272196	0.166754	0.350337											0.110988	0.220556
		0.206331	0.352138	0.172968	0.458171	0.216134											0.313162	0.091232
		0.351583	0.384224	0.503317	0.58215	0.00635017											0.842413	0.143239
		0.125169	0.532748	0.19603	0.260424	0.524926											0.492327	0.640051
		0.084126	0.162224	0.290072	0.703441	0.518613											0.277167	0.279703
		0.350978	0.392128	0.343664	0.24915	0.345881											0.365879	0.240841
		0.245584	0.8808	0.618239	0.170057	0.498678											0.83123	0.235026
		0.248914	0.470577	0.359661	0.276506	0.780006											0.411952	0.261504
		0.703321	0.746548	0.735239	0.180574	0.452699											0.260796	0.299585
		0.642021	0.180518	0.284361	0.731823	0.239315											0.436064	0.166404
		0.811692	0.179964	0.141033	0.277196	0.83126											0.163942	0.240243
		0.283761	0.660108	0.451511	0.524117	0.692226											0.722123	0.23202
		0.850906	0.416657	0.0200195	0.525304	0.0908853											0.328987	0.260788
		0.464467	0.142895	0.405447	0.784214	0.218862											0.464101	0.195487
		0.191833	0.166406	0.0427911	0.465327	0.863661											0.4016	0.885676
		0.565551	0.738782	0.55356	0.310487	0.339529											0.588304	0.0287993
		0.311391	0.029545	0.506278	0.497584	0.755805											0.120684	0.221489
		0.512632	0.48046	0.465108	0.609604	0.802452											0.543556	0.0960933
		0.784503	0.215745	0.160314	0.312471	0.465791											0.858756	0.406785
		0.372774	0.00836185	0.0210804	0.319934	0.0532106											0.157778	0.234762
		0.760187	0.724535	0.358558	0.637778	0.224736											0.29707	0.278018
		0.231887	0.403046	0.354808	0.885421	0.719383											0.0129908	0.816963
		0.528961	0.728718	0.209918	0.555518	0.831654											0.610306	0.253725
		0.0690323	0.501471	0.53628	0.573953	0.877994											0.0980236	0.0492167
		0.739949	0.993271	0.164289	0.0384658	0.597123											0.213648	0.0492869
		0.837667	0.0450645	0.165758	0.335869	0.395292											0.843474	0.203634
		0.289043	0.27808	0.350682	0.870224	0.451764											0.773366	0.404242
		0.310241	0.104278	0.745036	0.170895	0.365249											0.316571	0.274901
		0.152863	0.0186847	0.265338	0.604001	0.955644											0.820335	0.217285
		0.595355	0.301277	0.295559	0.636861	0.288683											0.080733	0.161468
		0.34027	0.420778	0.402246	0.746252	0.450529											0.769426	0.469871
		0.201042	0.327584	0.413827	0.94668	0.522096											0.0654031	0.310355
		0.567489	0.354489	0.130342	0.923366	0.720734											0.644563	0.700118
		0.865952	0.465133	0.579249	0.649839	0.113551											0.370308	0.285593
		0.767385	0.24498	0.20748	0.477455	0.294468											0.367753	0.388695
		0.476917	0.343866	0.391361	0.284145	0.805364											0.828673	0.368122
		0.53099	0.490661	0.52202	0.032722	0.506569											0.33634	0.115865
		0.263361	0.00368061	0.330906	0.735988	0.489872											0.246743	0.384175
		0.290297	0.396996	0.337483	0.184774	0.191963											0.38043	0.22175
		0.262864	0.443248	0.222479	0.584757	0.0920347											0.73281	0.29665
		0.354434	0.0497385	0.162306	0.484688	0.176488											0.60781	0.345903
		0.297212	0.483728	0.456939	0.675414	0.556389											0.250222	0.43168
		0.362978	0.213488	0.209254	0.838468	0.333418											0.557347	0.21968
		0.446547	0.779525	0.394456	0.733472	0.380672											0.628769	0.591861
		0.521911	0.28911	0.369766	0.461924	0.253751											0.241992	0.71849
		0.570745	0.327441	0.509459	0.319215	0.0560023											0.0419723	0.609407
		0.959028	0.191109	0.537932	0.576665	0.761042											0.624416	0.0165231
		0.181905	0.505264	0.29794	0.893888	0.358916											0.0408867	0.0255977
		0.312845	0.210057	0.305368	0.32989	0.155164											0.237607	0.593189
		0.349024	0.803409	0.274465	0.0411165	0.0673959											0.182808	0.129241
		0.474382	0.285394	0.0403086	0.27569	0.147384											0.895564	0.624682
		0.907904	0.134388	0.0442686	0.497797	0.338922											0.183011	0.54831
		0.721971	0.754574	0.270387	0.466625	0.522339											0.108139	0.404445
		0.298488	0.299523	0.175132	0.431734	0.332658											0.103221	0.00615715
		0.323046	0.0349486	0.128123	0.422182	0.264999											0.499906	0.0678148
		0.48851	0.149998	0.0247301	0.0533527	0.351758											0.250654	0.294153
		0.0268934	0.41452	0.618929	0.398027	0.408755											0.339763	0.906947
		0.765505	0.399031	0.0253088	0.558817	0.305787											0.528413	0.0189324
		0.321825	0.301007	0.830487	0.391744	0.226725											0.401117	0.306772
		0.477465	0.577942	0.630956		0.662262											0.147472	0.94406
		0.600003	0.386216	0.285549		0.210863											0.152539	0.368948
		0.203939	0.0888767	0.0942898		0.636085											0.594343	0.208669
		0.205708	0.328235	0.140626		0.608474											0.222572	0.0442146
		0.228865	0.137616	0.213573		0.590162											0.44588	0.331929
		0.490081	0.20809	0.132978		0.0617206											0.562918	0.458455
		0.0272149	0.434733	0.70636		0.173286											0.938121	0.278781
		0.652929	0.812073	0.331182		0.592375											0.055379	0.333619
		0.330031	0.18912	0.205855		0.23438											0.637507	0.325494
		0.779322	0.140731	0.260368		0.253309											0.721849	0.279897
		0.420612	0.189455	0.519626		0.573714											0.461369	0.0970174
		0.687715	0.10901	0.728549		0.190828											0.211245	0.652361
		0.631706	0.727198	0.510336		0.120155											0.544651	0.090626
		0.428889	0.132408	0.114846		0.0617648											0.904255	0.386127
		0.433226	0.471816	0.172671		0.31272											0.162201	0.50701
		0.316758	0.259773	0.582595		0.221675											0.51357	0.201822
		0.241662	0.412149	0.537476		0.602942											0.556037	0.0318315
		0.269112	0.258929	0.399215		0.844522											0.410903	0.0387983
		0.521851	0.88664	0.561335		0.288653											0.682234	0.602248
		0.593453	0.295228	0.658601		0.195575											0.720411	0.027357
		0.941885	0.878699	0.044562		0.246967											0.217935	0.484857
		0.462483	0.299968	0.281853		0.0635176											0.245352	0.555035
		0.427741	0.684398	0.694336		0.0268468											0.250691	0.90055
		0.49072	0.228211	0.101309		0.349107											0.561382	0.104053
		0.524415	0.477742	0.31063		0.0739571											0.390658	0.120271
		0.458069	0.336653	0.309856		0.41549											0.229807	0.737817
		0.106391	0.122923	0.353936		0.590596											0.529591	0.212066
		0.0790607	0.330803	0.216815		0.231451											0.205768	0.186663
		0.400969	0.880165	0.927925		0.661892											0.273478	0.0735849
		0.608033	0.487828	0.472973		0.226613											0.461984	0.158837
		0.0980054	0.386001	0.738696		0.345077											0.071251	0.46132
		0.43073	0.26783	0.214674		0.71703											0.392386	0.690337
		0.259386	0.509088	0.423657		0.713498											0.626056	0.307013
		0.405228	0.382711	0.210195		0.164245											0.570603	0.296201
		0.409249	0.481986	0.32639		0.442172											0.829346	0.272114
		0.310692	0.0425406	0.310238		0.766916											0.365882	0.223156
		0.265814	0.566718	0.164263		0.159345											0.368882	0.223155
		0.797462	0.188595	0.262767		0.242451											0.40037	0.320079
		0.0982387	0.810435	0.520702		0.321131											0.549462	0.282528
		0.0284425	0.473992	0.542502		0.244581											0.408582	0.332644
		0.353276	0.359825	0.337965		0.0519324											0.304504	0.97081
		0.405373	0.163172	0.14498		0.46424											0.0900482	0.228063
		0.0873792	0.0312851	0.212553		0.532457											0.156179	0.366824
		0.360263	0.627394	0.409232		0.420905											0.0493424	0.750605
		0.33283	0.569748	0.231462		0.163248											0.253365	0.652085
		0.575894	0.813475	0.58408		0.686345											0.251782	0.275711
		0.814143	0.444089	0.107933		0.0697875											0.531181	0.0887165
		0.537293	0.340592	0.0245878		0.803918											0.145285	0.452272
		0.0101587	0.19745	0.53075		0.336646											0.537806	0.46124
		0.429698	0.397555	0.587736		0.221956											0.888884	0.185117
		0.170176	0.537058	0.329598		0.723987											0.414862	0.438169
		0.758251	0.258152	0.245075		0.154503											0.344924	0.761215
		0.261782	0.391182	0.13751		0											0.308512	0.211848
		0.277867	0.540604	0.186001		0.386689											0.445981	0.594324
		0.398792	0.511785	0.373164		0.274633											0.2355	0.302169
		0.209721	0.349034	0.409705		0.288848											0.180146	0.335356
		0.484598	0.227609	0.599554		0.642877											0.451836	0.387417
		0.787361	0.722658	0.554493		0.207227											0.43411	0.369232
		0.688707	0.168138	0.283969		0.69486											0.948445	0.32135
		0.747325	0.307042	0.0381621		0.293385											0.0196445	0.24907
		0.156452	0.42052	0.30217		0.400301											0.531492	0.24829
		0.306589	0.579035	0.49111		0.154971											0.269943	0.250728
		0.469292	0.214851	0.0259117		0.749797											0.0597176	0.173854
		0.72265	0.029971	0.602991		0.821936											0.552573	0.342425
		0.538222	0.330175	0.197269		0.936478											0.910332	0.33185
		0.491832	0.790885	0.460417		0.476373											0.468761	0.36752
		0.222248	0.166039	0.880384		0.195918											0.506062	0.352633
		0.211127	0.461653	0.0654591		0.236387											0.778658	0.327164
		0.0119521	0.390555	0.22439		0.547991											0.162281	0.659585
		0.176824	0.292369	0.394048													0.362283	0.232383
		0.0323519	0.224659	0.165136													0.360217	0.345918
		0.359677	0.190845	0.37361													0.877406	0.153196
		0.922356	0.355392	0.117466													0.294863	0.0508038
		0.274335	0.193709	0.380788													0.297065	0.219219
		0.695482	0.415919	0.267682													0.0769958	0.498788
		0.125483	0.325941	0.619726													0.796944	0.925557
		0.637643	0.123641	0.149238													0.426174	0.428462
		0.439299	0.274758	0.437699													0.452512	0.312093
		0.0498511	0.318541	0.204606													0.482488	0.223124
		0.416347	0.291687	0.181815													0.172176	0.120963
		0.060921	0.273953	0.48991													0.727067	0.592841
		0.845836	0.300743	0.463357													0.882702	0.748312
		0.670695	0.513548	0.605181													0.137372	0.12444
		0.0391771	0.32038	0.574603													0.340372	0.848798
		0.668062	0.073344	0.578517													0.729715	0.0481968
		0.801636	0.497373	0.866716													0.470481	0.4758
		0.335216	0.239578	0.539865													0.327425	0.208496
		0.538138	0.246988	0.683632													0.130424	0.344705
		0.631023	0.354103	0.19861													0.219838	0.319123
		0.239426	0.117314	0.930184													0.421728	0.965721
		0.933232	0.0422137	0.609193													0.526415	0.394272
		0.596564	0.676562	0.493481													0.436116	0.121995
		0.506136	0.210999	0.482186													0.855959	0.45577
		0.0630882	0.850746	0.188642													0.718189	0.13367
		0.865066	0.181321	0.566668													0.378857	0.132409
		0.219924	0.452232	0.424127													0.497447	0.600557
		0.83568	0.377215	0.673772													0.456533	0.231748
		0.271827	0.274626	0.236488													0.244944	0.359629
		0.50031	0.398206	0.0735944													0.262823	0.424802
		0.0323856	0.0167697	0.41616													0.835737	0.386637
		0.350063	0.411833	0.369453													0.393635	0.213499
		0.231289	0.425955	0.506583													0.485979	0.0493529
		0.109401	0.535353	0.16184													0.733126	0.683085
		0.593109	0.223586	0.500059													0.727962	0.206088
		0.372164	0.169869	0.513836													0.454251	0.388157
		0.259306	0.157468	0.290462													0.363478	0.318277
		0.61864	0.556239	0.0215839													0.256148	0.326255
		0.579196	0.312147	0.387218													0.184961	0.141915
		0.680287	0.230992	0.325112													0.876719	0.52681
		0.969819	0.87866	0.452214													0.186288	0.417171
		0.217455	0.075345	0.240913													0.342744	0.270788
		0.237268	0.49989	0.732141													0.859827	0.0764765
		0.0493922	0.427045	0.19098													0.527852	0.236804
		0.0291754	0.472987	0.538594													0.258353	0.345659
		0.510118	0.523548	0.559422													0.730876	0.219288
		0.483759	0.297942	0.523482													0.718823	0.407614
		0.6298	0.613749	0.644426													0.159382	0.24263
		0.880092	0.377246	0.127887													0.0241862	0.463648
		0.310458	0.4945	0.510553													0.17763	0.212261
		0.228673	0.415696	0.572635													0.170813	0.936541
		0.599188	0.335626	0.0183195													0.918795	0.126717
		0.360075	0.235908	0.272691													0.24824	0.949716
		0.31982	0.83037	0.0991821													0.719665	0.201403
		0.548442	0.47363	0.627189													0.585432	0.275344
		0.400724	0.346134	0.153548													0.731826	0.547026
		0.414988	0.457783	0.472548													0.659941	0.312966
		0.0274182	0.29082	0.588075													0.0924133	0.845754
		0.11514	0.182095	0.704131													0.516438	0.706853
		0.665451	0.0925893	0.819013													0.2617	0.418346
		0.242909	0.291783	0.357681													0.0955786	0.248005
		0.220772	0.123379	0.450414													0.755728	0.1575
		0.80444	0.813468	0.211075													0.719065	0.399161
		0.192192	0.180078	0.66804													0.751665	0.23851
		0.644105	0.507693	0.931469													0.438115	0.643852
		0.942408	0.255652	0.659353													0.256411	0.40523
		0.611761	0.50674	0.340965													0.366778	0.34845
		0.560929	0.336326	0.433269													0.256537	0.422142
		0.535552	0.311073	0.128862													0.681372	0.370042
		0.325055	0.405938	0.178201													0.754506	0.693594
		0.408254	0.431329	0.291327													0.464965	0.246814
		0.247052	0.130916	0.761198													0.543787	0.108647
		0.876958	0.103938	0.163604													0.633446	0.296218
		0.331878	0.300335	0.0823946													0.797995	0.0307718
		0.354153	0.0874109	0.0327277													0.513502	0.082385
		0.62593	0.432717	0.237042													0.241339	0.421885
		0.223025	0.270286	0.329056													0.385291	0.18825
		0.0399891	0.231981	0.329078													0.178873	0.440913
		0.562926	0.0817202	0.29985													0.638237	0.0776295
		0.171722	0.289486	0.794154													0.608777	0.297953
		0.616488	0.37695	0.674929													0.327478	0.247439
		0.176217	0.467727	0.276003													0.598559	0.767801
		0.491712	0.0673384	0.272421													0.232279	0.386818
		0.246533	0.323217	0.0280484													0.387145	0.260687
		0.277868	0.0703876	0.219175													0.377388	0.24279
		0.174035	0.128104	0.0580073													0.853443	0.321363
		0.353404	0.793133	0.528554													0.369564	0.74516
		0.329242	0.755572	0.0867797													0.485683	0.854331
		0.30065	0.488076	0.367749													0.437256	0.235101
		0.310443	0.687552	0.421838													0.247255	0.413404
		0.133918	0.315811	0.0288909													0.856391	0.0905782
		0.278598	0.4166	0.483553													0.583792	0.00533914
		0.327508	0.565973	0.359904													0.727314	0.993217
		0.344161	0.205161	0.486456													0.472666	0.3377
		0.344446	0.119638	0.0664445													0.850447	0.362096
		0.76456	0.4375	0.369019													0.453533	0.459207
		0.625544	0.458563	0.385344													0.0363193	0.457512
		0.500635	0.316458	0.197128													0.243112	0.252408
		0.245116	0.865004	0.392163													0.181511	0.385075
		0.89228	0.34978														0.287169	0.335139
		0.258053	0.69941														0.356459	0.216665
		0.182764	0.71968														0.286338	0.781939
		0.178727	0.317299														0.824812	0.20874
		0.0697624	0.0706315														0.575082	0.313433
		0.191715	0.558616														0.675852	0.220064
		0.250558	0.719464														0.318638	0.644726
		0.59303	0.119091														0.82939	0.361279
		0.564038	0.376679														0.152753	0.507894
		0.436255	0.14974														0.280227	0.919002
		0.530614	0.0178521														0.872279	0.467761
		0.453697	0.31274														0.370838	0.366164
		0.339828	0.484798														0.84504	0.313578
		0.40542	0.301436														0.578153	0.637531
		0.394192	0.284551														0.433711	0.881135
		0.644032	0.362273														0.254671	0.316133
		0.595871	0.638021														0.811795	0.597042
		0.852324	0.477037														0.391198	0.172975
		0.331891	0.228572														0.623836	0.188364
		0.656038	0.783388														0.163381	0.331016
		0.106546	0.184379														0.326712	0.0737461
		0.533861	0.919109														0.0634523	0.860631
		0.214485	0.141349														0.320772	0.25828
		0.482726	0.61844														0.775051	0.229765
		0.574755	0.535153														0.209099	0.300748
		0.179359	0.0935311														0.424053	0.540487
		0.459559	0.495332														0.687888	0.278704
		0.101062	0.271242														0.986828	0.0801803
		0.649152	0.2549														0.384334	0.0420588
		0.735141	0.31794														0.305346	0.506145
		0.580865	0.669891														0.169224	0.182785
		0.4056	0.572675														0.236124	0.648101
		0.368457	0.0968841														0.515483	0.186495
		0.742755	0.486308														0.393492	0.140659
		0.0739179	0.528302														0.824139	0.0604326
		0.860077	0.648207														0.316995	0.0386276
		0.0459859	0.366466														0.218557	0.550581
		0.616291	0.242748														0.869326	0.52523
		0.35486	0.591137														0.892728	0.00293174
		0.221976	0.271311														0.781758	0.673666
		0.23871	0.644141														0.303084	0.0723702
		0.782978	0.268486														0.607505	0.152872
		0.614137	0.676444														0.166265	0.863891
		0.196151	0.535015														0.962333	0.72296
		0.547978	0.500096														0.68502	0.263998
		0.182292	0.611582														0.0926519	0.959485
		0.397805	0.422969														0.375607	0.257288
		0.539982	0.50627														0.265145
		0.142454	0.435049														0.761751
		0.219142	0.358496														0.226362
		0.740033	0.39893														0.396873
		0.548796	0.293831														0.630831
		0.42607	0.561386														0.278876
		0.428105	0.175941														0.81419
		0.295154	0.0225029														0.694177
		0.0498295	0.0811471														0.16184
		0.980292	0.0532252														0.158923
		0.290289	0.330065														0.671484
		0.705893	0.0665717														0.609654
		0.246063	0.334304														0.118786
		0.531712	0.599147														0.264565
		0.0905145	0.532768														0.48314
		0.617056	0.505529														0.676843
		0.29528	0.900991														0.396895
		0.614514	0.979396														0.531114
		0.45261	0.364141														0.407268
		0.386791	0.159506														0.328718
		0.873609	0.393778														0.327059
		0.771735	0.130536														0.39364
		0.64803	0.243176														0.228895
		0.498206	0.0274339														0.606831
		0.272249	0.302656														0.363465
		0.580647	0.172449														0.79739
		0.180275	0.309102														0.779385
		0.858881	0.339828														0.569498
		0.466066	0.694412														0.148058
		0.493285	0.355885														0.363972
		0.216042	0.162921														0.149733
		0.563902	0.584962														0.469931
		0.173715	0.300781														0.282786
		0.489253	0.297012														0.837797
		0.0653982	0.222681														0.945636
		0.390703	0.493874														0.404785
		0.890283	0.160337														0.686386
		0.561358	0.218729														0.389069
		0.437317	0.266097														0.512729
		0.508729	0.309551														0.1869
		0.0962288	0.545042														0.344864
		0.574342	0.258618														0.0907587
		0.428932	0.618953														0.297048
		0.0948908	0.0354205														0.183057
		0.197857	0.764321														0.588026
		0.358598	0.319928														0.233928
		0.0782856	0.0325775														0.0265581
		0.494855	0.204107														0.515985
		0.751945	0.692154														0.358901
		0.28889	0.342393														0.558444
		0.598649	0.328427														0.851274
		0.350657	0.184014														0.564012
		0.665399	0.565757														0.451731
		0.82679	0.0342188														0.375841
		0.770822	0.230836														0.053658
		0.860603	0.38093														0.76788
		0.302732	0.468259														0.559395
		0.596689	0.177104														0.31108
		0.307276	0.619044														0.426512
		0.207649	0.26532														0.186296
		0.228583	0.259283														0.536326
		0.0350376	0.214219														0.201439
		0.904182	0.225633														0.229926
		0.550799	0.423077														0.899265
		0.352811	0.104204														0.222841
		0.161402	0.783414														0.747661
		0.0285036	0.336807														0.612559
		0.0652389	0.265289														0.807612
		0.457405	0.444342														0.194925
		0.312777	0.615916														0.196876
		0.736558	0.253941														0.339106
		0.242774	0.304922														0.543682
		0.474715	0.301882														0.754301
		0.411365	0.232166														0.793403
		0.679853	0.189596														0.315943
		0.208314	0.224181														0.301035
		0.418321	0.549564														0.278579
		0.847003	0.211141														0.744613
		0.161913	0.326179														0.91979
		0.529015	0.390282														0.796497
		0.851973	0.590474														0.860018
		0.81485	0.203254														0.350841
		0.17349	0.262698														0.307439
		0.0975217	0.295417														0.83412
		0.295335	0.698878														0.287315
		0.135844	0.763947														0.331392
		0.817499	0.597409														0.099699
		0.114571	0.658864														0.661653
		0.461324	0.334189														0.823022
		0.791659	0.618122														0.752306
		0.814627	0.514478														0.482638
		0.324313	0.42771														0.949859
		0.402617	0.230348														0.571209
		0.3283	0.181381														0.51875
		0.233584	0.292917														0.434708
		0.280296	0.168129														0.461383
		0.24521	0.56805														0.309416
		0.693459	0.264749														0.883672
		0.56211	0.296715														0.189091
		0.436958	0.318678														0.863825
		0.484957	0.735995														0.322142
		0.431302	0.365304														0.881827
		0.125896	0.726911														0.70699
		0.76255	0.196501														0.768158
		0.262284	0.406317														0.219992
		0.215881	0.307494														0.248977
		0.154064	0.299078														0.312055
		0.752289	0.431851														0.327921
		0.327102	0.231197														0.364439
		0.299131	0.46693														0.922582
		0.437571	0.296608														0.712531
		0.534356	0.174189														0.767139
		0.567916	0.266652														0.439336
		0.737939	0.28445														0.535742
		0.400274	0.180767														0.732073
		0.327002	0.862451														0.364809
		0.436381	0.386791														0.245876
		0.341681	0.267094														0.118649
		0.218211	0.369909														0.733375
		0.324972	0.525219														0.254182
		0.103874	0.252041														0.674918
		0.323886	0.166501														0.0644393
		0.743289	0.0615912														0.798664
		0.677566	0.537673														0.0989468
		0.537426	0.71426														0.157565
		0.600202	0.442829														0.633594
		0.686581	0.026732														0.846478
		0.601071	0.404793														0.428571
		0.661499	0.463424														0.0732586
		0.690985	0.355036														0.550618
		0.268156	0.329481														0.157299
		0.170792	0.218254														0.494801
		0.514907	0.223173														0.323267
		0.741916	0.178026														0.756779
		0.957143	0.433056														0.317603
		0.134519	0.374825														0.251975
		0.376108	0.30467														0.117096
		0.192093	0.557793														0.184175
		0.836713	0.31599														0.421211
		0.835076	0.424247														0.039258
		0.112975	0.0759316														0.91345
		0.10766	0.0218079														0.762659
		0.356066	0.515144														0.298938
		0.530485	0.34099														0.367507
		0.506222	0.452223														0.256848
		0.114965	0.64531														0.207405
		0.412447	0.221165														0.249203
		0.705545	0.454811														0.348778
		0.163427	0.333917														0.331144
		0.805795	0.0818826														0.178358
		0.0195517	0.281493														0.403121
		0.532211	0.509535														0.0227192
		0.183077	0.620957														0.546759
		0.330477	0.0237372														0.065874
		0.585828	0.74837														0.53408
		0.389449	0.19753														0.270867
		0.676618	0.430509														0.616795
		0.573073	0.26114														0.48065
		0.452988	0.157826														0.38678
		0.886142	0.35768														0.223353
		0.431604	0.0328544														0.0387313
		0.626013	0.243379														0.786447
		0.800272	0.520197														0.530804
		0.563331	0.515861														0.218694
		0.549024	0.602659														0.309654
		0.314641	0.584028														0.337897
		0.431475	0.548675														0.332097
		0.759768	0.456331														0.782362
		0.865729	0.154139														0.175167
		0.322401	0.333296														0.196004
		0.0565401	0.177085														0.289834
		0.558176	0.809093														0.16607
		0.1399	0.129924														0.280733
		0.518395	0.747905														0.00826166
		0.192168	0.382816														0.0838635
		0.416332	0.422497														0.29808
		0.658287	0.352625														0.929509
		0.512654	0.332565														0.524808
		0.195896	0.664358														0.767248
		0.292143	0.414028														0.684808
		0.120962	0.424024														0.691079
		0.2698	0.355955														0.4349
		0.462021	0.690414														0.515752
		0.499672	0.560615														0.0477229
		0.319637	0.0224841														0.483537
		0.35719	0.19771														0.102562
		0.33097	0.627861														0.325823
		0.508825	0.128026														0.148662
		0.336875	0.230139														0.378462
		0.511578	0.117381														0.504496
		0.156111	0.302417														0.344891
		0.0757857	0.243679														0.239719
		0.298359	0.38589														0.810579
		0.506247	0.39331														0.660269
		0.457038	0.114293														0.459234
		0.188767	0.602131														0.661608
		0.60925	0.221614														0.166764
		0.108966	0.4866														0.479039
		0.224353	0.0938439														0.71008
		0.513794	0.316264														0.293487
		0.281669	0.286703														0.608763
		0.168198	0.718146														0.350387
		0.0284072	0.723697														0.291316
		0.221247	0.22022														0.458376
		0.593565	0.334208														0.290026
		0.759882	0.0366615														0.346282
		0.930394	0.159518														0.598646
		0.24216	0.13076														0.208751
		0.262907	0.145371														0.613135
		0.858474	0.580215														0.47926
		0.257229	0.5001														0.922048
		0.159437	0.379265														0.26008
		0.334463	0.259093														0.376605
		0.640205	0.265737														0.208124
		0.464739	0.330939														0.82425
		0.619845	0.651015														0.668514
		0.831398	0.387067														0.276182
		0.652523	0.411883														0.926835
		0.339751	0.207898														0.0418735
		0.398423	0.744048														0.587092
		0.809218	0.228342														0.32636
		0.321646	0.72288														0.219976
		0.306992	0.868827														0.50056
		0.922243	0.263966														0.916675
		0.623786	0.288667														0.030483
		0.183929	0.713942														0.249017
		0.060681	0.539679														0.525119
		0.133551	0.431829														0.0911644
		0.44298	0.317089														0.64571
		0.24159	0.548402														0.563303
		0.659004	0.557497														0.373729
		0.398109	0.0151764														0.247836
		0.870569	0.311065														0.242017
		0.01594	0.266265														0.450897
		0.597634	0.386033														0.0245123
		0.209789	0.407249														0.705788
		0.503156	0.255984														0.685868
		0.367176	0.274776														0.49038
		0.0398654	0.393432														0.752061
		0.245971	0.187069														0.101531
		0.600203															0.511497
		0.584979															0.849238
		0.617031															0.640829
		0.282984															0.219277
		0.296472															0.292862
		0.193842															0.765446
		0.450659															0.690994
		0.836671															0.550336
		0.0880162															0.802689
		0.571349															0.423555
		0.535697															0.723554
		0.286667															0.0439513
		0.0664838															0.174624
		0.272412															0.357086
		0.426926															0.502042
		0.530387															0.0126966
		0.509504															0.187229
		0.438505															0.463461
		0.0337157															0.357623
		0.485434															0.247664
		0.632716															0.476813
		0.299019															0.108712
		0.0819073															0.445156
		0.243487															0.333256
		0.96157															0.693923
		0.225603															0.0424908
		0.283743															0.497363
		0.157729															0.754733
		0.244255															0.00558744
		0.708049															0.725585
		0.270597															0.473823
		0.215628															0.406408
		0.488104															0.534918
		0.796522															0.644675
		0.645449															0.546998
		0.433277															0.45274
		0.196056															0.406357
		0.247876															0.684268
		0.156006															0.287969
		0.0604884															0.0645198
		0.31934															0.162332
		0.369973															0.166055
		0.805692															0.502696
		0.800189															0.242917
		0.44817															0.499276
		0.719233															0.171834
		0.0252897															0.313358
		0.391623															0.849625
		0.816933															0.33683
		0.641061															0.768432
		0.0162496															0.307234
		0.0438288															0.18071
		0.26562															0.387138
		0.186209															0.629771
		0.575135															0.264171
		0.262313															0.863689
		0.384087															0.252469
		0.0407313															0.154849
		0.40131															0.350432
		0.409554															0.615884
		0.845147															0.630635
		0.216103															0.218733
		0.187999															0.567728
		0.313434															0.170058
		0.282982															0.230444
		0.556808															0.419389
		0.579421															0.10684
		0.484294															0.846929
		0.552054															0.244376
		0.104333															0.471669
		0.441937															0.045337
		0.707312															0.877564
		0.181858															0.308076
		0.263403															0.339594
		0.671324															0.580456
		0.0590776															0.560983
		0.665954															0.420024
		0.744962															0.869844
		0.884134															0.223485
		0.194057															0.605447
		0.338624															0.723956
		0.135111															0.538156
		0.478354															0.359215
		0.842502															0.30319
		0.569715															0.609893
		0.427638															0.204686
		0.233603															0.150128
		0.419098															0.0996321
		0.119074															0.0450176
		0.824502															0.60723
		0.426546															0.785918
		0.50907															0.203198
		0.678898															0.795236
		0.723936															0.0109
		0.559389															0.342643
		0.274082															0.57563
		0.39943															0.0359879
		0.269284															0.66129
		0.594122															0.274621
		0.371099															0.2477
		0.616645															0.0300462
		0.491058															0.256198
		0.759541															0.801219
		0.243099															0.889786
		0.227081															0.400719
		0.385098															0.135869
		0.62259															0.282779
		0.57265															0.0136074
		0.394198															0.315943
		0.337747															0.236791
		0.191398															0.524464
		0.333649															0.941398
		0.436779															0.318962
		0.129112															0.620613
		0.752328															0.0748413
		0.267795															0.797958
		0.268853															0.309584
		0.277848															0.897456
		0.727515															0.455233
		0.0483586															0.430512
		0.686163															0.601589
		0.226695															0.623466
		0.695618															0.388909
		0.682465															0.115187
		0.189854															0.796264
		0.474973															0.137054
		0.350842															0.434652
		0.323266															0.593278
		0.5599															0.918869
		0.518684															0.362663
		0.213778															0.485148
		0.181															0.294535
		0.181889															0.0991335
		0.415805															0.422061
		0.31741															0.428635
		0.334446															0.486244
		0.628952															0.827798
		0.547977															0.466257
		0.181602															0.568964
		0.023394															0.0328815
		0.372208															0.738755
		0.665832															0.465175
		0.616023															0.890217
		0.323385															0.887019
		0.271531															0.543619
		0.289434															0.632959
		0.181476															0.135925
		0.297601															0.334162
		0.299605															0.385583
		0.696913															0.194709
		0.728082															0.434537
		0.500768															0.223876
		0.135293															0.640762
		0.74232															0.577323
		0.393059															0.283543
		0.723692															0.298583
		0.830056															0.88162
		0.821473															0.686859
		0.203423															0.263898
		0.175216															0.00735112
		0.625937															0.2243
		0.711436															0.214048
		0.192015															0.535257
		0.333363															0.22738
		0.294231															0.027845
		0.178074															0.541885
		0.372126															0.189
		0.303715															0.411093
		0.562488															0.149813
		0.368553															0.534011
		0.614791															0.271157
		0.438361															0.250979
		0.235652															0.62908
		0.607458															0.697022
		0.411641															0.0730695
		0.389677															0.658047
		0.977101															0.282835
		0.244535															0.776067
		0.540142															0.231066
		0.470441															0.679642
		0.806013															0.472008
		0.542051															0.211804
		0.425846															0.325526
		0.401746															0.417981
		0.580205															0.260156
		0.0531935															0.371772
		0.463608															0.49827
		0.516837															0.249297
		0.353642															0.0515009
		0.490081															0.371609
		0.102585															0.445395
		0.476129															0.179494
		0.734347															0.487644
		0.520154															0.301816
		0.144999															0.669315
		0.217176															0.764035
		0.142316															0.487624
		0.342379															0.473517
		0.388902															0.497905
		0.79329															0.250342
		0.605717															0.485117
		0.971449															0.401758
		0.46082															0.422735
		0.371871															0.851773
		0.172618															0.315948
		0.10212															0.202173
		0.412128															0.308773
		0.345217															0.55238
		0.291436															0.812058
		0.367532															0.247761
		0.135511															0.224331
		0.207853															0.90879
		0.450673															0.353337
		0.248693															0.416024
		0.29053															0.0743349
		0.352378															0.477388
		0.346537															0.289391
		0.0757275															0.19144
		0.328166															0.207305
		0.398202															0.116555
		0.335756															0.295924
		0.825671															0.967119
		0.57535															0.63395
		0.505907															0.0935013
		0.618915															0.323719
		0.384936															0.644244
		0.150455															0.519386
		0.597964															0.207491
		0.0339975															0.431475
		0.644614															0.39945
		0.270108															0.0702496
		0.682745															0.618067
		0.404423															0.438758
		0.0371257															0.440451
		0.38816															0.177273
		0.129574															0.539443
		0.677573															0.922609
		0.144452															0.704911
		0.210504															0.308774
		0.698248															0.19689
		0.958857															0.391708
		0.400363															0.0863305
		0.327058															0.423897
		0.288719															0.801003
		0.325707															0.562768
		0.204669															0.231554
		0.489788															0.160662
		0.472665															0.310784
		0.714294															0.292826
		0.404854															0.16229
		0.730148															0.114983
		0.473228															0.239081
		0.579945															0.130632
		0.141458															0.250378
		0.00074971															0.690085
		0.738308															0.40308
		0.250676															0.254075
		0.29836															0.0390643
		0.476976															0.356378
		0.250904															0.128795
		0.676749															0.219878
		0.0141609															0.8927
		0.73757															0.943018
		0.0218894															0.434631
		0.131627															0.742305
		0.118931															0.529687
		0.18512															0.892008
		0.502811															0.0388118
		0.270586															0.401723
		0.354649															0.18563
		0.5081															0.57733
		0.030853															0.67812
		0.694588															0.803809
		0.317943															0.20716
		0.458039															0.378831
		0.356067															0.400436
		0.329398															0.396387
		0.433705															0.585718
		0.647581															0.768334
		0.609092															0.303872
		0.300167															0.117662
		0.293384															0.209317
		0.296136															0.325019
		0.474176															0.49112
		0.208762															0.0997204
		0.137669															0.604377
		0.50341															0.440648
		0.572188															0.369844
		0.513851															0.570368
		0.197524															0.203081
		0.739599															0.343727
		0.857331															0.338247
		0.378808															0.371777
		0.419098															0.327577
		0.0219593															0.238583
		0.461099															0.463201
		0.0829258															0.937638
		0.715483															0.336388
		0.891558															0.412128
		0.213721															0.387866
		0.860683															0.0677189
		0.385552															0.0581018
		0.396097															0.544428
		0.469878															0.972558
		0.452626															0.269369
		0.336691															0.330648
		0.0922634															0.361871
		0.408227															0.204885
		0.191435															0.325936
		0.268227															0.404663
		0.590803															0.178136
		0.491871															0.184864
		0.360389															0.168123
		0.383421															0.316959
		0.562191															0.090881
		0.260601															0.580795
		0.312676															0.0790254
		0.328013															0.358284
		0.231761															0.290345
		0.614991															0.324447
		0.337725															0.108061
		0.586028															0.422392
		0.238533															0.670111
		0.462561															0.171167
		0.713627															0.187044
		0.517541															0.229263
		0.492853															0.507052
		0.0877917															0.511172
		0.178841															0.700348
		0.43468															0.780126
		0.163843															0.249725
		0.891754															0.23028
		0.795828															0.580012
		0.414438															0.711593
		0.480237
		0.182259
		0.28777
		0.682294
		0.0506393
		0.766844
		0.359811
		0.57407
		0.272901
		0.861014
		0.228444
		0.131837
		0.487782
		0.823099
		0.908096
		0.380727
		0.365126
		0.083472
		0.464668
		0.533016
		0.344097
		0.159136
		0.394081
		0.226962
		0.274248
		0.884529
		0.639882
		0.205186
		0.102091
		0.26736
		0.67966
		0.37704
		0.448097
		0.400645
		0.643987
		0.728861
		0.149708
		0.473241
		0.799563
		0.708168
		0.260195
		0.451381
		0.486042
		0.718447
		0.0165631
		0.495014
		0.224338
		0.534476
		0.553652
		0.816289
		0.738503
		0.178769
		0.320126
		0.152341
		0.140673
		0.601022
		0.217818
		0.405834
		0.804831
		0.281228
		0.0120338
		0.535571
		0.177481
		0.294175
		0.470095
		0.438986
		0.273833
		0.270784
		0.210906
		0.196502
		0.281799
		0.807206
		0.455869
		0.278832
		0.326443
		0.558109
		0.558955
		0.357345
		0.289359
		0.52098
		0.55693
		0.461181
		0.113844
		0.242261
		0.134001
		0.264942
		0.339602
		0.52572
		0.314192
		0.240594
		0.630034
		0.158304
		0.0763923
		0.439232
		0.0504057
		0.587602
		0.86072
		0.777823
		0.633073
		0.0210662
		0.507774
		0.398763
		0.746594
		0.690391
		0.66423
		0.894924
		0.26004
		0.584095
		0.305882
		0.231602
		0.641387
		0.27305
		0.64555
		0.882387
		0.393227
		0.258668
		0.0579127
		0.334628
		0.656404
		0.437397
		0.014753
		0.774547
		0.573512
		0.148418
		0.497822
		0.405444
		0.229887
		0.890726
		0.365954
		0.336224
		0.40468
		0.331461
		0.605476
		0.302834
		0.288822
		0.518675
		0.790767
		0.92171
		0.490526
		0.0462424
		0.497398
		0.290705
		0.142193
		0.185392
		0.425088
		0.375229
		0.619423
		0.421689
		0.320059
		0.741917
		0.447382
		0.525542
		0.106433
		0.737782
		0.348488
		0.591122
		0.405994
		0.969284
		0.188075
		0.245752
		0.720003
		0.918366
		0.400094
		0.011338
		0.320913
		0.260217
		0.693399
		0.231593
		0.683485
		0.250091
		0.0875961
		0.220702
		0.258693
		0.498088
		0.224445
		0.281949
		0.18802
		0.224707
		0.528402
		0.391691
		0.123795
		0.402608
		0.195802
		0.0593819
		0.474224
		0.272088
		0.00505706
		0.153933
		0.630984
		0.244207
		0.259992
		0.121122
		0.333611
		0.748945
		0.339709
		0.22101
		0.994169
		0.542841
		0.488499
		0.43136
		0.405372
		0.803721
		0.540376
		0.757079
		0.310103
		0.512046
		0.860778
		0.873743
		0.290112
		0.0665308
		0.163663
		0.162403
		0.159407
		0.224493
		0.24315
		0.312183
		0.446627
		0.271234
		0.249425
		0.00727076
		0.464582
		0.35474
		0.668118
		0.423107
		0.285128
		0.606884
		0.325919
		0.387044
		0.538547
		0.0702285
		0.78995
		0.351604
		0.45684
		0.719965
		0.606749
		0.370234
		0.475218
		0.187209
		0.389655
		0.467708
		0.596916
		0.661586
		0.142876
		0.784545
		0.374379
		0.941875
		0.339873
		0.783408
		0.149415
		0.634832
		0.604059
		0.21823
		0.677846
		0.767495
		0.356954
		0.932878
		0.583643
		0.233642
		0.640942
		0.570185
		0.347065
		0.295038
		0.352393
		0.925753
		0.614571
		0.7289
		0.537902
		0.596042
		0.872211
		0.101245
		0.668371
		0.658627
		0.698781
		0.697554
		0.21795
		0.658521
		0.37402
		0.478277
		0.298434
		0.924761
		0.61202
		0.283279
		0.228462
		0.590838
		0.23943
		0.17256
		0.246862
		0.606923
		0.295693
		0.914587
		0.196598
		0.772155
		0.436282
		0.756426
		0.445293
		0.820555
		0.886318
		0.163808
		0.22268
		0.413894
		0.355087
		0.466014
		0.767374
		0.2899
		0.918914
		0.617195
		0.568866
		0.40393
		0.387864
		0.721369
		0.194028
		0.37204
		0.3088
		0.290331
		0.267885
		0.398619
		0.523106
		0.489583
		0.793168
		0.356254
		0.70922
		0.632715
		0.439174
		0.3123
		0.780363
		0.329913
		0.224895
		0.380124
		0.710917
		0.253664
		0.0517709
		0.087105
		0.219982
		0.211263
		0.652213
		0.453958
		0.215057
		0.130901
		0.0674599
		0.413638
		0.652972
		0.0918857
		0.214262
		0.130441
		0.232422
		0.308869
		0.398301
		0.372072
		0.332787
		0.774584
		0.740674
		0.509655
		0.324323
		0.44395
		0.927815
		0.341101
		0.112039
		0.235069
		0.245258
		0.374499
		0.761332
		0.160154
[truncated: 1,225 more rows]
