# Supplementary material for: Compartmentalized oskar degradation in the germ plasm safeguards germline development
Source: eLife journal article supplement (doi:10.7554/elife.49988), 2020-01-07
Supplement: supp [file elife-49988-supp-v1.zip › elife_poa_e49988_Figure_2_source_data_3.xlsx]

## Sheet: Sheet1
Figure 2D
		Displacement
		Germ Granules							Germ Granules								Founder Granuels							Founder Granuels
		Before 1	Before 2	Before 3	During 1	During 2	During 3			Before 1	Before 2	Before 3	During 1	During 2	During 3		Before 1	Before 2	Before 3	During 1	During 2	During 3			Before 1	Before 2	Before 3	During 1	During 2	During 3
		0.458852	0.184419	0.264204	0.662733	0.388342	1.44897		Avg	0.538132	0.439547	0.463702	0.546856	0.580719	0.598009		0.469006	0.231172	0.351568	0.260206	0.204297	0.211367		Avg	0.563518	0.484542	0.46474	0.460564	0.47177	0.420004
		0.284525	0.270431	1.05549	0.440092	1.35758	0.372165		StDev	0.387429	0.31243	0.31163	0.379475	0.400686	0.389379		0.692729	1.10706	0.526678	0.0748785	0.0566146	0.271045		StDev	0.413678	0.371916	0.317371	0.3544	0.321383	0.287226
		0.839061	0.787927	0.258107	0.191437	0.23393	0.202569										0.764623	0.332127	0.266602	1.376	0.420161	0.078113
		1.47189	0.0534255	0.33265	0.368099	0.160414	0.771911			Before	During						0.251681	0.392332	0.380859	0.36638	0.487069	0.415234			Before	During
		1.15481	0.0637076	1.65627	0.165704	0.57202	0.823696		Avg	0.48046	0.575195						0.0188049	0.484718	0.537445	0.595269	0.156453	0.332928		Avg	0.504267	0.450779
		0.293684	0.559494	0.355622	0.584534	0.793783	1.09156		SEM	0.0296669	0.0150226						1.13572	0.655083	2.07153	0.600591	0.751308	0.961256		SEM	0.0301724	0.015724
		0.569904	0.152219	0.197393	0.232655	1.22458	1.02253										0.0062593	0.257166	0.58694	0.503124	0.290454	0.57726						Germ vs Founder Ttest
		0.629624	0.727955	0.526917	0.390806	0.948268	0.542978										0.568436	0.00589108	0.566165	1.4467	0.28881	0.338028						Before	During
		0.721748	0.892127	0.967908	0.258967	1.08796	1.17964										0.578114	0.0886594	0.355911	0.176853	0.0653532	0.124628					p-value	0.603736	0.00461925
		0.0489151	0.334386	0.267644	0.132159	1.22259	1.39311										0.51807	0.402695	0.386451	0.306728	0.315387	0.362954						n.s.	**
		0.766865	0.0303226	0.190804	0.372429	0.929366	1.08249										0.340425	0.0212402	0.543902	0.3349	0.525844	0.284777
		0.322192	0.255493	0.523527	0.538182	0.351656	0.545319										0.84121	1.77522	0.331758	0.37486	0.379586	0.581849
		0.442205	0.26884	0.567477	0.644641	0.409579	0.603663										0.613998	0.327247	0.489617	0.537735	0.455778	0.949815
		0.571924	1.65093	0.639929	0.182648	0.357681	0.729633										1.1314	0.326782	0.274764	0.0831513	0.442864	0.218111
		0.280482	0.220317	1.10922	0.465071	0.887461	0.350078										1.18755	0.0217371	0.252198	0.307207	0.278233	0.135148
		0.268105	0.779173	0.204576	0.0204036	0.181892	0.251478										0.368044	0.783946	1.04946	0.837284	0.63978	0.0953119
		0.959535	0.533706	1.17097	0.0351901	0.327202	0.441988										1.28021	1.1149	0.288143	0.255796	0.348969	0.50262
		0.691938	0.285887	0.312735	0.393023	0.410633	0.320207										0.629465	0.411151	1.41559	0.332287	0.616865	0.792071
		0.489778	0.186405	0.975745	0.591612	0.50876	1.19263										1.07274	0.629133	0.363545	0.820265	0.279882	0.00715883
		1.2771	0.338506	0.275009	0.0227051	0.126261	0.242103										0.629842	0.239146	0.929558	0.433899	0.627927	0.0888398
		1.33572	0.511433	0.350866	0.774333	0.925418	0.27658										0.725979	0.493856	0.596303	0.316717	0.412233	0.199747
		0.222354	0.545591	0.249821	0.306535	0.0389825	0.667294										0.315757	0.522336	0.539688	0.577659	0.782293	0.458567
		0.0836756	0.0120851	0.69414	0.796414	1.38467	1.11947										0.388232	0.228041	0.522634	0.534129	0.490661	0.710678
		1.15453	0.169448	1.06768	0.527762	0.683939	0.254572										0.270886	0.437462	0.29463	0.148932	0.3726	0.232217
		0.206272	0.533331	0.188095	1.06486	0.557822	0.501295										0.555109	1.13926	0.254794	0.387782	0.512353	0.130981
		0.605447	0.263317	0.273565	0.3534	0.685389	1.17613										0.445393	0.729153	0.238716	0.231355	0.638628	0.416391
		0.381343	0.265793	0.64859	0.399662	0.11511	0.273684										0.611517	1.41667	0.533905	0.277803	0.24257	0.337079
		0.221751	0.259202	0.319911	0.220697	0.897199	0.358509										0.363198	0.18802	0.558612	0.760377	0.0111405	0.631372
		0.478093	0.0941224	0.529229	0.361989	1.85103	0.267337										0.371343	0.196716	0.137685	0.477773	0.240095	0.644436
		0.320655	1.33599	1.49457	0.211253	0.592433	0.462966										0.364192	0.994012	0.279111	0.204962	0.0253546	0.383352
		0.0708067	0.270837	0.944155	0.0621694	0.170998	1.23761										1.28667	0.330423	0.556519	0.415611	0.253335	0.0335214
		0.523065	0.981382	0.248889	0.129764	0.482549	0.377162										0.3628	0.186667	0.672494	0.342185	0.186527	0.5728
		0.162253	0.365184	0.265987	0.359119	0.384175	0.373885										0.267638	0.843339	0.717471	0.545719	0.558843	0.307139
		0.326529	0.401781	0.478192	0.580027	0.723075	0.803302										1.01474	0.767915	0.684937	0.335415	0.466529	0.0361948
		0.223398	0.23863	0.336245	0.25	0.319846	0.561829										0.667744	0.275633	0.1087	0.466148	1.05396	0.745575
		0.396745	0.522178	0.534666	0.47583	0.267342	0.266663										0.602644	0.291542	0.381413	0.36532	0.488181	0.754225
		0.693916	0.659703	0.53384	0.532566	0.520979	1.15677										1.40873	1.36178	0.497996	0.792584	0.290409	0.25886
		0.301656	0.472296	0.303138	0.28187	0.229509	0.425097										1.14674	0.26445	0.34985	1.14979	1.95418	0.419985
		0.813416	0.216102	0.285929	0.43832	0.484619	0.0463369										1.36004	2.01552	0.0467529	0.362534	0.0584188	0.493818
		0.385482	0.260279	0.218982	1.059	0.538122	1.09948										0.465502	0.765189	0.116232	0.588043	0.400113	0.297646
		0.492504	0.570114	0.551211	0.161308	0.374407	1.34506										0.199719	1.55654	2.12253	0.565057	0.337418	0.0960307
		0.223766	0.20559	0.390625	0.245474	0.410314	0.75674										0.42739	0.125245	0.234987	0.664543	0.264314	0.30393
		1.34045	0.286511	0.124254	1.2707	1.63912	0.811418										0.963105	1.3703	0.758728	0.386235	0.028069	1.13505
		0.91783	0.00250244	0.218353	0.561316	0.531143	0.357858										0.855598	0.048219	0.177536	0.483789	0.0619326	0.314579
		0.170019	0.774327	0.694809	0.52173	0.786961	0.456846										0.803134	0.367078	0.828661	0.957944	0.319077	0.706385
		0.603686	0.556182	0.511306	0.677457	0.565953	1.13252										0.0928231	0.533363	0.543423	0.793171	0.377678	0.44421
		0.040247	0.0577057	0.648796	0.273232	1.09152	1.05383										0.332459	0.0515224	0.156976	0.728661	0.624776	0.544099
		0.217347	0.267098	0.5293	0.27434	0.245097	1.06591										0.567182	0.093511	0.013855	0.146451	0.200307	0.293291
		0.715717	0.531025	0.186686	0.123578	0.800051	0.35866										0.981304	0.843427	0.316843	0.605284	0.416229	1.07117
		0.57578	0.224833	0.252188	0.248446	0.533823	0.588136										0.27417	0.636356	0.728771	0.0403626	1.15905	0.371685
		0.219576	0.220581	1.15582	1.53461	1.18131	1.42353										0.517017	0.484607	0.512528	1.91747	0.258036	0.502257
		0.257996	0.203586	0.357397	0.223579	0.280653	0.946131										0.278177	0.624264	0.0867752	0.270182	0.581518	0.0214647
		0.240689	0.400037	0.56897	0.546123	0.533327	0.558503										1.93992	0.801288	0.297189	0.379455	0.559289	0.0110474
		0.939921	0.319696	0.52818	0.61845	0.361106	1.07616										0.246106	0.535365	0.877582	0.294399	0.473201	0.0315672
		0.847731	0.796376	0.309665	0.250329	0.63006	0.106641										0.249023	1.07601	0.0780029	0.374173	0.0172164	0.922057
		0.937524	0.262391	0.460526	0.382986	0.534369	0.254175										1.03979	0.141909	0.490014	0.811956	0.0947462	0.734938
		0.311629	0.333453	0.804648	0.274956	0.487493	0.235657										0.329667	0.561655	0.151893	0.200067	0.528846	0.292807
		0.297116	0.23767	0.981176	0.228778	0.605889	0.455469										0.949802	0.738525	0.22616	0.306823	0.051856	0.273612
		0.553378	1.31128	0.212948	0.872327	0.596447	0.747258										0.206913	0.279309	0.246498	0.540937	0.827622	0.4597
		0.118826	0.363178	0.799752	0.774641	0.484004	1.1786										0.855273	0.269901	0.785278	0.782	0.32341	0.257859
		0.0778437	0.682883	0.22391	1.79763	0.286617	0.578006										0.848084	0.456979	0.381217	0.0738046	0.94128	0.111907
		0.293571	0.0282769	0.52558	0.188528	0.417113	0.285041										0.947765	0.397603	0.54603	2.64009	0.833618	0.0720609
		0.415058	0.0422681	0.36404	0.501902	1.10131	0.532708										0.80407	1.34556	0.26876	0.280498	0.480649	0.431889
		0.0309708	0.560795	0.49378	0.266734	0.355538	0.0601008										0.541887	0.0841667	0.378177	2.65526	0.393473	0.332549
		0.0513717	0.463388	0.488301	0.28095	0.143555	0.252003										0.334444	0.706556	0.619311	0.33522	0.405464	0.264568
		0.376991	0.33662	0.255896	0.513628	1.33449	0.516022										0.164703	0.554395	0.0987135	0.213574	0.282231	0.224923
		0.0217285	0.197325	0.815383	0.603509	0.637728	0.493772										0.53345	1.36331	0.125458	0.170018	0.559361	0.0600545
		0.534088	0.376339	0.284716	0.276397	0.7743	0.309568										0.340157	0.284885	0.37725	0.287869	0.581328	0.285363
		0.00164795	0.377128	0.529213	0.125022	0.453003	0.706017										0.588314	1.37568	0.402211	0.380339	0.229988	0.0360107
		0.0101788	0.439864	0.0618183	0.249475	0.840773	0.403326										0.285289	0.313347	0.192014	0.271801	0.635209	0.417772
		0.205389	0.316187	0.654764	0.475778	0.27858	0.0549234										0.156371	0.357359	0.462422	0.969461	0.455328	0.382256
		0.154144	0.768704	1.34323	0.00140381	0.554806	0.455911										0.964464	0.295669	0.560968	0.343551	0.429734	0.30413
		0.0668554	0.297248	1.55014	0.22371	0.643255	0.571283										0.41176	0.122797	0.564573	0.300419	0.421636	0.621829
		0.245852	0.965656	0.294596	0.398146	0.121719	0.217843										0.368011	1.104	0.229695	0.569601	0.462338	0.736123
		0.427433	0.789434	0.366944	0.825825	0.342749	0.376834										0.855791	0.585329	0.752509	0.305976	0.357334	0.457738
		1.13526	0.61058	0.0171187	0.26346	1.36293	0.317798										0.328779	0.351032	0.263767	0.16619	0.228384	0.050658
		0.539993	0.583193	0.341633	0.471185	0.351353	0.525727										0.504219	0.275213	0.253176	0.462999	0.338722	0.200346
		2.81773	0.798927	0.230548	0.228177	0.0778659	0.216224										0.178395	0.316538	0.378768	0.308533	0.492984	0.306494
		0.937431	0.267766	0.426827	0.37169	0.726966	0.18988										1.37518	1.22164	0.232816	0.533081	0.237393	0.558827
		0.245994	0.650627	0.720082	0.231832	0.686823	0.90814										0.750694	0.0191406	0.228833	0.110748	2.19807	0.211222
		0.0902954	1.00593	0.222071	1.11943	1.85637	0.834403										0.0233946	0.962565	0.161472	0.146438	0.877843	0.219095
		0.266879	0.538772	1.47481	0.432292	0.286942	0.465524										0.533412	0.489202	1.34799	0.904697	0.664297	0.597233
		0.287338	1.18137	0.678635	0.0216812	1.0667	0.2697										1.15043	1.23193	1.74847	0.499001	0.637886	0.174194
		0.460316	0.238862	0.309746	0.391843	0.603871	0.716578										0.397403	1.48566	0.0843986	0.238145	0.326958	0.866577
		0.0387581	0.563368	0.677335	0.546818	0.916039	0.53334										0.397591	0.251005	0.784807	0.316741	0.508226	0.322497
		0.104563	0.277101	0.229629	0.183404	1.09964	0.20565										0.551588	1.33624	0.558517	0.285874	0.699368	0.134646
		0.690208	0.0337559	0.536932	0.197075	0.316154	1.07085										1.86692	0.528896	0.580509	0.287336	0.593792	0.244233
		0.747812	0.555971	0.219126	0.2707	0.634369	0.874743										0.179088	0.376145	0.653143	0.236189	0.502488	0.935741
		0.873689	1.57984	0.29423	0.480397	0.168749	0.854835										0.669635	0.469033	0.896723	0.307101	0.435517	0.201993
		0.525824	0.522037	0.862452	0.506588	0.4879	0.15575										1.5287	0.366271	0.282341	0.811038	0.465698	1.01396
		0.429904	0.449059	0.711609	0.114437	0.837769	0.279434										0.887468	0.277645	1.31946	1.33405	0.77303	0.51505
		0.36403	0.698747	0.567881	1.04675	1.35662	0.490773										0.519062	0.29317	0.243625	0.407308	0.0494385	0.243738
		0.206144	0.222566	0.330007	0.611347	1.04029	0.837847										0.804731	0.0588501	0.292412	0.0141266	1.12056	0.547287
		0.294128	0.518766	0.0432163	0.196453	0.298005	0.713709										0.406905	0.638365	0.0170584	0.528666	0.638162	0.775257
		0.538051	0.279336	0.313521	0.71025	1.37012	1.76679										1.17725	0.25578	0.422705	0.201563	0.624514	0.329318
		1.42313	0.225941	0.356201	0.345578	0.109126	0.419866										0.543116	0.550049	0.305309	0.506061	0.167471	0.275996
		2.04657	0.553925	0.153042	0.406851	0.53216	0.943077										0.443182	0.412059	0.281514	0.334156	0.30079	0.275724
		0.601664	0.205182	0.615198	0.564195	0.0457659	0.534281										0.177068	0.184448	0.679901	0.939634	0.272775	0.694082
		0.680473	0.260283	0.915146	1.3471	0.218506	0.910387										0.306592	0.291663	0.596276	0.569121	0.367123	0.308596
		0.581539	0.232887	0.280038	0.737765	0.444423	0.0756182										0.572193	1.70697	0.828715	0.659723	0.452759	0.189598
		0.613525	0.588933	0.302144	1.26016	0.282568	0.789996										0.499577	0.348312	0.257632	0.600464	0.533353	0.386916
		0.789675	0.601741	0.460989	0.551079	0.249302	0.570374										0.387178	2.42266	0.623726	0.272025	0.548739	0.386321
		0.259594	0.277267	0.602911	0.567761	0.478451	0.199485										0.161133	0.645187	0.561476	1.10626	0.0501281	0.0225378
		0.39157	0.251758	0.170134	1.11772	2.04188	0.620461										0.34058	0.23522	0.0368484	0.680556	0.668691	0.625199
		0.697586	0.248433	0.232768	0.378957	0.813603	0.0287401										0.937753	0.240061	0.549064	0.315213	0.160706	0.319593
		0.548218	0.7537	0.336913	0.363916	0.0446979	0.281917										0.385909	0.426259	0.383045	0.585364	0.187236	0.486555
		0.447042	0.0746034	0.78172	0.395264	0.955735	0.339524										1.27213	0.533884	0.307462	0.349227	0.488149	0.843872
		0.535359	0.37673	0.0720055	0.310132	0.404712	0.2486										0.653616	0.684456	0.635292	0.241826	0.472251	0.194531
		0.442618	0.525204	0.567888	0.797965	1.06836	0.0217357										0.0531499	0.261156	0.394017	0.712871	0.69023	0.280276
		0.0609949	0.804367	1.49097	0.376922	0.600316	0.250385										1.12178	0.816939	0.794309	0.551131	0.386862	0.245979
		0.622618	0.503402	0.858455	0.0469475	0.0489325	0.532611										1.69732	0.462073	0.342667	0.0844155	0.549792	0.556012
		0.523564	0.722373	1.08584	0.216083	0.339676	0.343216										0.795097	0.106542	0.488026	0.918563	0.0505419	0.0643852
		0.420276	0.480425	0.501847	1.28211	0.933518	0.737301										0.373038	0.326234	0.31284	0.653083	1.17708	0.575806
		0.306958	0.435535	0.756676	1.44844	1.06662	0.352095										0.0157471	0.663181	0.496792	0.535014	0.387356	0.290877
		1.43777	0.221764	0.260044	0.780002	0.89637	0.794197										0.292364	0.704991	0.26103	0.742996	1.11174	0.961656
		0.0671264	0.578736	0.556042	1.18238	0.233399	0.221056										0.0955423	0.500665	0.241404	0.100845	0.0802151	0.376213
		0.0853246	0.236894	0.948039	0.432731	0.800671	0.356088										1.59051	0.373033	0.530143	0.197471	0.169849	0.162869
		0.169315	0.150904	0.152366	0.610623	1.18633	0.157912										0.460713	0.361417	0.837537	0.571074	0.215935	0.664055
		0.327969	0.307984	0.600405	0.287293	0.340568	0.335712										0.466466	0.307629	0.275045	0.332926	0.395813	0.373457
		0.294956	0.34325	0.170766	1.53133	0.347266	0.352042										1.14988	0.348389	0.544383	0.171882	0.271472	0.442901
		0.374542	0.31839	0.582995	0.277107	0.552472	0.239353										1.36687	0.230319	1.33298	0.24682	1.88563	0.471925
		1.11015	0.684752	0.263206	0.741943	0.422434	1.55145										0.404785	0.475994	0.289252	0.47896	0.523869	0.302404
		0.0709963	0.523315	0.291702	0.318769	0.352478	0.995729										1.35186	1.05342	0.360124	0.272083	0.512685	0.51132
		0.244793	0.0357468	0.667189	0.0423887	0.711186	0.415152										0.597532	0.211908	0.354239	0.133303	0.0254109	0.219824
		0.723833	0.277184	0.30662	0.329912	0.770324	0.25613										0.125653	0.176331	0.771671	0.730028	0.397062	0.259253
		0.306642	0.15696	0.477317	0.922868	0.771426	1.16252										1.54497	0.369591	0.590532	0.186335	0.595977	0.549081
		0.0456549	0.967775	0.646574	0.65005	0.821041	0.584408										0.55086	0.808737	0.386605	0.468706	0.525433	0.589295
		1.06489	0.571901	0.534217	0.270459	0.887496	0.281284										0.366502	0.94967	0.289612	0.465198	0.271504	0.350156
		0.881114	0.0430478	0.39366	0.272279	0.237569	0.309948										0.517095	1.03186	0.514097	0.866597	0.63567	0.377075
		0.994656	0.884277	0.659737	0.267014	1.30274	0.0554199										1.14236	0.892231	1.18882	0.30454	0.512284	0.100083
		0.484851	0.189543	0.366071	0.855525	0.0575677	0.528101										1.42278	0.292267	0.246841	0.432386	0.451556	0.165442
		1.09218	0.472926	0.210205	0.317654	0.424988	0.981287										1.10743	1.18562	0.153872	0.408691	0.59556	0.455919
		0.533203	0.305405	0.216328	0.305117	0.218851	1.92302										0.812954	0.581454	0.0619946	0.325445	0.908118	0.00823975
		0.178078	0.484529	1.90589	1.47441	0.198307	1.35299										0.770873	0.27118	0.392205	1.56955	0.487588	0.121404
		0.18185	0.0226068	0.0510874	0.550094	0.0359967	0.270609										0.562622	0.55271	1.01216	0.266369	0.28419	0.4545
		0.356624	0.674769	0.603156	0.795849	0.627227	0.266255										0.288999	0.316997	0.683676	0.208708	0.474203	0.292445
		0.982003	0.0265624	0.305872	0.26754	1.22446	0.969903										0.259166	0.8912	0.0635921	0.313315	0.443994	0.203161
		0.767802	0.13987	0.221545	0.367087	0.471347	0.295072										0.923992	0.260759	0.199997	0.386561	0.202259	0.171421
		0.890818	0.227217	0.505788	0.865024	2.29906	0.623337										0.733528	0.445957	0.234135	0.171542	0.448012	0.880736
		0.559814	0.338755	0.29239	0.336711	0.709097	1.42387										1.15757	0.246572	0.792464	0.196282	0.847314	0.0480097
		0.368323	0.0141964	0.0812714	0.384712	0.247388	0.256819										0.533443	0.542493	1.10586	1.02047	0.237207	0.563512
		0.412282	0.470022	0.532174	0.376071	0.552154	0.0469772										0.381573	0.385536	0.305472	0.136988	0.377162	0.383243
		1.06201	0.149629	0.495591	0.320733	0.0232271	0.873836										0.358138	0.535902	1.01467	0.340831	0.537046	0.370753
		0.133912	0.239593	0.274193	0.0308026	1.04159	0.619045										0.629716	0.490534	0.361032	0.938557	0.211045	0.779914
		0.551732	0.170935	0.624301	0.271158	0.398307	0.289068										0.2823	0.422852	0.181256	0.358383	0.312532	0.291656
		0.279956	0.227857	0.238479	0.526982	0.883341	0.417511										0.848369	0.72792	0.517661	0.181528	0.0571104	0.0875612
		1.05614	1.19125	0.339403	0.372675	0.282085	1.70393										0.49605	0.718474	0.34283	0.24778	0.416029	0.641237
		0.389132	0.49444	0.539515	0.0297251	0.460193	1.43786										1.11005	1.99127	0.710273	0.624192	0.965485	0.676578
		0.761704	1.34122	0.204006	0.891515	0.607779	1.3728										0.300755	0.0604872	0.260856	0.250986	0.79041	0.137165
		0.768177	0.820272	0.46809	0.564019	0.429937	0.542525										0.202058	0.298256	0.685702	0.579899	0.466146	0.735592
		0.167255	0.0682373	0.545688	0.510778	0.395614	0.109942										0.874144	0.628873	0.281879	0.346621	0.205815	0.0900937
		0.364374	0.589173	0.589764	0.48218	0.0442514	0.289394										0.459862	0.242544	0.363633	0.65331	0.526877	0.537587
		0.72984	0.42589	0.215123	0.799927	1.2708	0.820304										0.233397	0.25683	0.259493	0.125366	0.338064	0.193648
		0.332148	1.76581	0.576165	0.730821	0.843339	0.595549										0.217168	0.332437	1.07967	0.590653	0.545909	0.266959
		0.59077	0.20484	0.390066	0.601523	1.19302	0.270311										0.754063	0.649179	0.285445	0.521828	0.38296	0.246872
		0.31597	0.567964	0.0635486	0.276733	0.866073	0.0893596										0.302014	0.0985213	0.0479817	0.0572873	0.748676	0.0775488
		0.835327	0.14888	0.292515	1.08981	0.290588	0.300357										0.313931	1.50868	0.51933	0.378089	0.814328	0.232368
		0.206469	0.015625	0.156436	0.459434	0.526273	0.701093										0.588546	0.483585	0.227619	1.16802	0.492813	0.167545
		0.232783	0.310237	0.602444	0.0627669	0.409108	0.450117										1.49481	0.326784	0.775515	0.385079	0.210618	1.15086
		0.248203	0.592522	0.564315	0.18042	0.74333	0.785586										0.596303	1.42844	0.890675	0.240416	0.553382	0.351399
		0.186523	0.257186	0.553968	0.270713	0.369306	1.3686										0.522263	0.0224609	0.340985	0.557943	0.397954	0.287754
		0.179931	0.197981	0.538097	0.707651	0.429123	0.742972										0.408432	0.320818	0.450457	0.290129	0.218822	0.508946
		0.316088	0.214349	0.359058	0.169146	0.590763	0.181894										1.3353	0.931346	0.254758	0.409969	1.13164	0.204457
		0.385751	0.553651	0.751617	0.420127	1.38643	0.318322										0.968881	0.339816	0.402374	0.213661	0.261966	0.281691
		1.43933	0.228117	0.355047	0.575206	0.851287	0.515018										0.787465	0.466775	0.237381	0.0287411	0.529989	0.475886
		0.12957	0.317821	0.059008	0.173705	0.493663	1.03794										0.00549316	1.10642	0.0382813	0.291003	1.05951	0.620958
		0.0469368	0.254142	0.693812	0.379022	0.899108	0.165418										1.44207	0.323905	0.235411	0.652532	0.55869	0.266038
		0.784554	0.11717	0.0215676	0.60587	0.635986	0.241675										0.597179	0.242859	0.560061	0.334415	0.219798	0.356068
		0.75193	0.717734	0.476511	0.790247	0.43262	0.818757										0.784702	1.41552	0.367772	0.0821711	0.0390939	0.813655
		0.278733	1.01929	0.203364	0.344827	0.557719	0.563446										0.621521	0.490251	0.23516	0.497841	0.480222	0.28593
		1.37528	0.06755	0.800435	0.454222	0.872597	0.530795										0.812245	0.341716	0.677602	0.186465	0.321163	0.352109
		0.246102	0.778917	0.437528	0.351798	0.46858	0.599346										0.0767557	0.253715	2.03423	0.541212	0.620735	0.503328
		1.34969	0.324073	0.461754	0.185832	0.302331	0.616981										0.227058	0.237005	0.298768	0.261368	0.787644	0.189543
		0.517109	0.0401473	0.322501	0.436188	0.0464227	0.458024										0.208649	0.221157	0.774107	0.367552	0.768451	0.955333
		0.266959	0.701753	0.46356	0.261648	1.70529	0.251757										0.239675	0.427466	1.37697	0.21228	1.18278	0.659739
		0.98056	0.306139	0.747825	0.0207947	0.550074	0.776875										0.201226	0.503574	0.577934	0.0683472	0.849768	0.227839
		1.33344	0.440601	0.265028	0.554508	0.271432	0.851552										0.228138	1.31634	0.0965654	0.17715	0.577834	0.177002
		0.357668	0.260735	0.651289	0.267072	2.51036	0.387553										0.212834	0.383076	0.267634	0.933052	0.434217	0.505571
		1.6193	0.6412	0.656521	0.220422	0.296799	1.3506										0.627142	0.234241	0.767831	0.370644	0.213369	0.199789
		0.538424	0.23201	0.535766	0.258789	1.60503	0.604313										0.773318	0.22542	1.34468	0.628383	0.391649	0.380455
		1.3494	0.265901	0.313962	0.37111	0.577045	0.41641										0.340805	0.00272958	0.266467	0.3583	0.258258	0.91941
		0.958581	0.742661	0.412331	0.255535	0.208581	1.27738										0.399458	1.32758	0.343186	0.10158	0.539891	0.268467
		0.124885	0.327394	0.411304	1.82358	0.695902	0.324375										0.354493	0.533486	0.812098	0.393923	0.478972	0.069115
		0.826558	0.817305	0.589143	0.249524	0.38404	0.367759										0.837285	0.752704	0.352299	0.818878	0.412141	0.194389
		0.585043	0.571869	0.00892638	0.271829	0.747537	0.816882										0.198186	0.256068	0.146147	0.613295	0.269074	0.318822
		0.152831	0.375219	0.609131	0.266665	0.736581	0.178833										0.537529	1.18851	0.288887	0.285476	0.561868	0.182017
		0.628254	0.533579	0.902265	0.31238	0.132113	0.00537109										0.1591	0.135418	0.755625	0.812629	0.146036	0.251404
		0.054919	0.102604	0.20916	0.378007	0.481256	0.53336										0.401038	1.28266	0.32728	0.250091	0.595697	0.557791
		0.73797	0.363602	0.70772	0.825543	0.812902	0.538571										0.0441004	0.718866	0.25429	0.353211	0.613748	0.672915
		0.566773	0.124715	0.178904	0.566711	0.518586	1.07893										1.78871	0.417762	0.275072	0.366077	0.388223	0.019219
		0.267456	0.628589	0.0894296	0.839836	0.335449	0.418351										0.533325	0.387949	0.508724	0.500593	0.326631	0.650564
		0.350491	0.205688	0.258967	0.359331	0.194193	0.670962										0.346313	0.610892	0.34321	0.235221	0.779542	0.330727
		0.216005	0.287044	0.763079	0.273482	1.61439	0.330526										0.356425	1.43445	0.46118	0.562701	0.353642	0.167491
		0.732581	0.418045	0.211178	1.07239	0.0736813	0.705362										0.373768	0.34037	0.311779	0.190967	0.0538712	1.14113
		0.737951	0.221681	0.488152	0.533325	0.445389	0.394212										0.308999	0.258215	0.479903	0.613272	0.0889201	0.36117
		0.542388	0.319725	0.609235	0.253672	1.30501	0.241943										0.269413	0.75484	0.441351	0.516381	0.268736	0.464158
		0.356337	0.192697	0.495127	0.348834	0.28421	0.323581										0.162737	0.79372	0.699827	0.593291	0.2913	0.528412
		0.497727	1.47086	0.764189	0.308336	0.409175	0.247152										0.42076	0.356391	0.376714	0.358416	0.549268	0.500142
		0.504918	0.491848	0.341799	0.230855	0.613169	0.59104										0.410805	0.239024	0.253693	0.578003	0.173385	0.0452061
		0.265381	0.636802	0.222064	0.62339	0.25647	0.280548										0.167105	0.606599	0.346094	0.254679	0.484204	0.521375
		0.491387	0.342548	1.63183	0.602522	1.52871	0.214479										1.31796	0.0436618	0.074539	0.47645	0.182346	0.483945
		0.938723	0.228008	0.0256046	0.476446	1.04252	0.568283										0.087052	0.0658178	0.927036	0.0931015	0.591796	0.837297
		0.151034	0.155029	0.0298901	0.613369	0.778767	0.0629685										0.301663	0.302071	0.641016	0.3867	0.221145	1.30653
		0.303266	1.36634	0.624263	0.268007	1.05661	0.375867										0.222536	0.309299	0.298407	0.042139	0.31251	0.543116
		1.5906	0.538269	0.571086	0.211532	1.31801	0.56228										1.07384	0.522049	0.258349	1.1357	0.452853	1.04866
		0.378255	0.566878	0.351856	0.290207	0.237488	0.502969										0.0826567	0.269136	0.360951	0.75761	0.385724	0.730295
		0.279299	0.227625	0.491276	0.547422	0.387051	0.252935										0.249492	0.459115	0.278015	0.574666	0.293054	0.247495
		0.302729	1.00579	0.228295	1.08754	0.67899	0.952647										0.255395	1.69936	0.596276	0.731624	0.275382	0.569349
		0.492399	1.36316	0.53429	0.311689	0.586768	0.325137										0.294346	0.398691	0.241682	0.205754	0.250614	0.569904
		0.334882	0.408327	0.266757	0.35392	0.585243	0.31269										0.980576	1.14057	0.690179	0.483032	0.624639	0.468849
		1.28381	0.194257	0.209355	0.752734	0.0144261	0.84688										0.512674	0.42648	0.502935	0.298401	0.660924	1.19633
		0.287175	0.615682	0.781986	0.796895	0.820026	1.5294										0.434367	0.022969	0.754929	0.479005	0.650825	0.210343
		0.640661	0.263994	0.390834	0.231681	0.27246	0.744546										0.379395	0.307585	0.562571	0.386301	0.334839	0.283057
		0.401416	0.266518	0.693462	0.508351	0.476509	0.937175										1.37153	1.18257	0.731245	0.540959	0.268741	0.291925
		0.365487	0.276878	0.268308	0.259425	0.391789	0.027832										2.47477	0.92953	0.74966	0.97365	1.04375	0.783329
		0.0612244	0.250105	0.182242	0.478296	0.550238	1.11661										0.841145	0.753279	0.295867	0.80794	1.9035	0.706956
		0.403763	0.313328	0.322993	0.146831	0.991527	0.54172										0.302647	0.488986	0.0272969	0.0588299	0.00886419	0.891716
		0.207764	0.0517619	0.558915	0.641803	0.306064	0.682316										0.248247	0.367842	0.073701	0.851105	0.279622	0.899577
		1.70988	0.099668	0.881815	0.65199	0.25806	0.0124344										1.11496	0.0848364	0.2495	0.317762	0.533473	0.591028
		0.517263	0.258947	0.282617	0.346757	0.541312	0.529723										2.27188	0.0412007	0.158737	0.828761	0.123673	0.936077
		0.494794	0.0787803	0.0212402	0.478947	0.885621	1.66704										0.298234	0.667598	0.493982	0.379971	0.366593	0.600128
		0.668867	0.711283	0.230231	0.380585	0.401138	0.21881										0.712896	1.8991	0.0937108	0.195692	0.213328	0.297185
		0.3785	0.114691	0.526382	0.24469	0.252362	1.16533										0.060791	0.945842	0.804569	0.246698	0.572032	0.583638
		0.73099	0.453612	0.410989	0.77752	0.756945	0.409589										0.758894	0.0579636	0.431859	0.563738	0.0213623	0.507159
		0.275344	0.364259	1.89154	0.469644	0.719499	0.251947										0.300735	0.273801	0.337145	0.266627	0.601417	0.100978
		0.506313	0.668373	0.49977	0.500087	0.802115	0.909556										0.311997	1.91803	0.432147	0.312941	0.251751	0.270868
		1.41986	0.221294	0.105591	1.6324	0.354351	0.0373535										0.562828	0.220678	0.222113	0.528679	0.153136	0.312713
		0.336511	0.35415	0.553357	0.86818	0.266808	0.882029										1.09777	1.34518	0.601955	0.242371	0.445746	0.248083
		0.231295	0.518483	0.268663	0.118664	0.508735	0.488166										0.367715	0.355609	0.317984	0.295812	1.12924	0.24579
		0.278208	0.0744779	0.468884	0.347642	0.328736	0.342465										0.424241	0.627095	0.214442	0.704257	0.620225	0.301121
		1.09381	0.341601	0.817937	0.353494	0.280189	0.457101										0.578793	0.327845	0.50515	0.392835	0.368787	0.245664
		1.10965	1.10838	0.239607	0.853068	0.797317	0.241789										0.588341	0.594901	0.333945	1.00399	0.553597	0.332812
		1.1699	0.375297	0.488941	0.180051	0.181655	0.0051124										0.242526	0.360468	0.514607	0.291662	0.491076	0.48834
		0.713899	0.458509	0.303877	0.277295	0.915833	0.358758										0.404093	0.780909	0.311983	0.918276	0.42858	0.196977
		0.354262	0.293559	0.478344	0.256112	0.959317	0.945094										1.33332	0.032597	0.25121	0.0393891	0.295396	0.22259
		0.142264	0.283199	0.429954	0.371714	0.287069	0.546385										0.56714	0.290527	0.981735	0.282272	0.262837	0.307211
		0.903327	0.188806	0.133415	0.325206	0.181428	0.793186										1.89672	0.59408	0.496995	0.261466	0.581611	0.21161
		0.302976	0.273463	0.69212	0.830585	0	0.583207										0.960724	0.820319	0.273857	0.326445	0.540596	0.523093
		0.859576	0.289796	0.161394	0.824453	0.518464	0.531476										0.418467	0.0317482	0.05152	1.69243	0.230552	0.563964
		0.394174	0.121367	0.658466	0.855548	0.386466	0.0130615										0.970013	0.192476	0.580316	0.129028	0.168455	0.2516
		0.733663	0.844687	0.281897	0.564872	0.920195	0.714572										0.289948	0.0804374	0.393965	0.431215	0.314638	0.405717
		0.673775	0.407173	0.288152	0.394326	0.519531	1.35216										0.464968	0.27284	0.536736	0.517064	0.780832	0.318476
		0.430591	0.595983	0.219242	0.836993	0.858107	0.870608										0.361133	0.368461	0.460377	0.15691	0.254372	0.632696
		0.255098	0.187633	0.512679	0.627321	0.177734	1.12997										1.49503	0.343313	0.088562	0.217279	0.593812	0.800929
		0.528624	0.247622	0.23762	0.27676	0.452541	0.343403										0.523156	0.0300623	0.2852	0.84429	0.685478	0.362784
		0.85122	0.393915	0.563658	0.589515	0.201333	1.59808										0.520167	0.234991	1.07422	0.614698	0.613363	0.265685
		0.110955	0.211323	1.21533	0.502684	0.103298	0.317396										0.584358	0.0673704	0.395877	0.0715919	0.398771	0.394282
		0.513589	0.370689	0.249837	0.624094	0.796755	0.747231										0.185105	0.754235	0.554311	0.671833	0.289254	0.0297169
		0.811645	0.272157	0.577251	0.834157	1.12355	0.773858										0.272339	0.291227	0.580021	0.359176	0.203107	0.196602
		0.323951	0.0436078	0.0122636	0.0275198	0.743896	0.256096										0.22031	0.302001	0.608774	0.651012	0.709549	0.771775
		2.04601	0.706626	0.194861	0.247798	0.272529	0.230592										1.60892	0.285464	0.844441	0.25348	0.425894	0.868477
		0.541496	0.789283	0.315826	0.250781	0.599461	0.0226592										1.37791	0.14828	0.0428808	0.294307	1.08934	0.168579
		0.573103	0.490564	0.226274	0.800832	0.468402	0.624247										0.133215	0.170307	0.626757	0.46799	0.620703	0.453358
		0.625559	0.453802	0.53635	0.522304	0.591735	0.335533										1.30008	0.838632	0.439718	0.535632	1.53682	0.811139
		0.136972	0.321278	0.35782	0.324166	0.657099	0.578402										0.28001	0.327254	0.353129	0.52617	0.242433	0.375306
		0.554532	0.332743	0.22786	0.192509	0.325986	0.301533										0.632094	0.148811	0.476508	0.444858	0.226429	0.297218
		0.276182	0.419557	0.245365	0.0767638	0.328607	0.249952										0.217787	0.563137	0.0674476	0.653231	0.456723	0.0656007
		0.197632	0.481329	0.619203	0.380006	1.54219	0.222528										0.318976	0.272338	0.367065	0.38624	0.415832	0.835792
		0.292224	0.445199	0.518719	0.606276	1.41964	0.0207939										0.617835	0.276233	0.300389	0.553803	0.711215	0.558897
		0.240959	1.2827	0.231077	1.1622	0.702019	0.667214										0.234997	0.402181	1.03093	0.209814	0.340586	0.390388
		0.25824	0.788102	0.528239	0.533334	1.11301	0.591883										0.365813	0.843242	0.55767	0.0681656	0.0544644	0.0225457
		0.95776	0.350552	0.787639	1.09163	0.761087	0.224199										0.300239	0.960401	0.407315	0.336517	0.284042	0.471349
		0.766426	0.472578	0.32789	0.187378	0.146423	0.258649										0.0469841	0.526701	0.266482	0.284827	0.0382914	0.234131
		0.237509	0.267549	0.0302145	0.00935731	0.597454	0.271093										1.88962	0.185813	0.290004	0.162982	0.128198	0.789078
		1.64825	0.931768	0.522347	0.252127	1.3111	0.215305										0.485455	1.17377	0.269635	0.339317	0.444703	0.27545
		0.189537	0.26856	0.842315	0.590861	0.360989	0.336788										0.398954	0.223708	0.457769	0.573236	0.30306	0.521742
		0.632959	0.207912	0.149551	0.316306	0.797159	0.028523										0.800078	0.382882	0.570733	0.271512	0.363883	0.282123
		0.159554	0.922976	0.29657	0.506836	0.745393	0.578009										0.637969	0.198117	0.563949	0.479931	0.494869	0.226311
		0.188224	0.331099	0.113356	0.287417	0.722345	0.890414										0.27019	0.647363	0.390556	0.547118	1.00766	0.255982
		0.561917	0.290071	0.54629	0.303834	1.1314	0.496876										1.1535	0.85085	0.218297	0.531949	0.459497	0.278603
		0.621204	0.556395	0.0404053	0.263856	1.75365	1.1392										0.993062	0.258618	0.364123	0.50342	0.717337	0.493426
		1.419	0.55673	0.262038	0.255408	0.298815	0.263534										0.500574	0.364559	0.462519	0.212012	0.167381	0.922381
		0.26877	0.802082	0.259204	0.544427	1.34667	0.736344										1.13486	0.759089	0.104374	0.368642	0.526383	0.19883
		0.622286	0.794361	0.247335	0.261426	0.00438477	1.45883										0.769348	0.363367	0.697249	0.240612	0.703933	0.316984
		1.84902	0.0764624	0.3205	0.251786	0.352806	0.428299										1.03057	0.79153	0.749401	0.348812	0.138899	0.366105
		0.720485	0.258324	0.395802	0.0242625	0.264473	0.388525										0.0304788	0.460999	0.105354	0.568255	0.798119	0.466618
		0.287407	0.0182146	0.768848	0.564878	0.461089	0.620389										0.479498	0.486969	2.11642	0.0495703	0.791472	0.530663
		0.741778	0.963421	0.784596	0.791558	0.332744	0.356053										0.802025	1.16796	0.516743	0.35366	0.239517	0.194643
		1.62212	0.256195	1.23721	1.36702	0.752511	0.948717										0.400862	0.165055	0.271387	0.458561	0.509539	0.224984
		0.369812	0.210964	0.341218	0.186908	0.190177	0.59437										0.268488	0.459282	0.0958252	0.379217	0.307487	0.585634
		0.219151	0.266736	0.876407	0.581859	1.36826	0.451873										0.443658	0.309684	0.594877	0.550424	0.841354	0.357496
		0.299556	0.700805	0.562354	0.245118	0.217965	0.273877										0.289088	0.229126	0.389552	0.442332	1.33628	0.624428
		0.0970515	0.0128233	0.524931	0.830852	0.562609	0.611886										0.270391	0.320637	0.46257	0.193238	0.0656427	0.522367
		0.171999	1.06674	0.181683	0.337483	1.03694	0.790157										0.188563	0.585681	0.0524578	0.367687	0.483203	0.547724
		0.279457	0.0379433	0.255396	0.271524	1.10202	0.240877										0.309329	0.264584	0.854044	0.336126	0.259239	0.18511
		0.308141	0.322299	0.571893	0.479183	0.375838	1.34766										0.347556	0.0455617	0.582626	0.544915	0.849645	0.283652
		0.903596	0.739702	0.582915	0.27608	0.243565	1.34752										0.800079	0.609821	0.341023	0.291404	0.336285	0.293986
		0.535645	0.284929	0.382298	0.637227	0.382885	0.203321										0.339817	0.19915	0.908968	0.51468	0.319975	0.0665122
		0.269099	0.551204	0.577899	1.1231	0.21875	0.344169										0.0611114	0.576678	0.0544214	0.690134	0.42608	0.475548
		0.461502	0.530775	0.275029	0.782577	0.817946	0.309875										1.09738	0.228322	0.609901	0.0479366	0.753316	0.35282
		0.443968	0.560239	0.290374	0.640763	0.830492	0.0540019										0.41176	0.399392	0.477254	0.556876	0.0731935	0.487337
		0.87652	0.0282593	0.552107	0.306476	1.07618	0.119889										0.275553	0.318723	0.502024	0.336854	0.305215	0.408161
		0.302947	0.634902	0.485232	0.594838	0.29833	0.632155										0.727908	0.292545	0.599097	0.35406	1.17891	0.594074
		0.778249	0.0380122	0.371867	0.0542674	0.725884	0.511402										0.0798131	1.92462	0.535543	0.363822	0.532822	0.537733
		0.537627	0.783869	0.0506905	0.0174715	0.80507	0.585431										0.210009	0.594639	0.306455	0.36414	0.264312	0.0458018
		0.422667	0.126319	0.824197	0.410889	0.661865	0.429502										0.53186	0.942514	0.417529	0.331289	0.876882	0.852097
		0.169618	0.76624	0.926608	0.348338	0.731667	0.575608										0.576214	0.725452	0.473502	0.309684	0.46261	0.470838
		0.423507	0.760348	0.487474	0.687385	0.129247	0.591335										0.387717	1.08264	0.35599	0.0715332	0.816839	0.417239
		0.313115	0.785504	0.0187309	0.302692	0.23927	0.0129395										0.846558	0.575089	0.83946	0.842883	0.547451	0.298096
		1.41527	0.345252	0.212416	0.350745	0.316895	0.594668										0.266589	1.40891	1.1705	0.287865	0.61016	0.533325
		0.800097	0.289737	0.303047	1.32244	0.803148	1.12054										0.0761544	0.282959	0.257848	0.482254	0.25479	0.345882
		0.516767	0.835556	0.125522	0.649749	0.961516	0.243923										0.582632	0.218777	0.255358	4.14309	0.547333	0.548437
		0.31575	0.373721	0.227233	0.500842	0.704661	1.08143										0.314926	0.526963	1.24932	1.17875	0.843324	0.335582
		0.60414	0.316171	0.272533	0.243955	0.58315	0.255249										0.529508	1.03926	0.516564	0.382621	0.293498	1.90812
		0.409557	0.33787	0.414029	0.0748964	0.629068	0.584234										0.242513	0.749383	0.730895	0.93924	0.272913	0.134486
		0.740561	0.496615	0.053751	0.296035	0.851611	1.0978										0.827568	0.591776	0.543504	0.226683	0.315467	0.262328
		0.0163775	0.156513	0.544351	0.612407	0.538986	0.962487										0.237988	0.256969	0.319586	0.4739	0.781059	0.200476
		1.52375	0.498886	0.620613	0.797242	0.794991	0.477146										0.0653725	0.211876	0.262503	0.120939	0.388206	0.281446
		0.430047	0.116282	0.527826	0.607993	0.348853	0.797947										0.301894	0.611099	0.393279	0.294718	0.812302	0.639435
		0.468291	0.294038	0.73306	0.325372	0.308636	1.30542										0.458532	1.61541	0.267209	0.605018	0.129258	0.417573
		0.400203	0.830374	0.408032	0.585894	0.356396	0.210281										1.07461	0.171283	0.562707	0.602199	0.0944086	0.266407
		0.271606	0.228162	0.602117	0.017334	0.187812	0.964031										1.68808	0.8433	0.714055	0.525194	1.5501	0.517338
		2.24718	0.492124	0.347299	0.200083	0.377378	1.62214										0.364314	0.469901	0.37409	0.194664	0.508606	0.482385
		0.945347	0.32349	0.0431064	0.325494	0.52556	0.766415										0.796393	0.245069	0.559312	0.547434	0.0464556	0.235746
		0.750813	0.641353	0.350576	0.550534	0.407593	0.348394										0.263641	0.221523	0.220355	0.523719	0.475538	1.62233
		0.326086	0.273938	0.391616	0.591119	0.498533	0.688053										0.268845	0.328943	0.219972	0.517816	0.89485	1.0723
		0.650922	0.089103	0.183569	0.841371	0.594849	0.544061										1.18006	0.219013	0.338329	1.04744	0.813064	0.289042
		0.790958	0.74003	0.324094	1.63916	0.29698	0.353026										0.178188	0.697174	0.961516	0.377409	0.655232	0.306709
		0.246117	0.117625	0.140308	0.43793	0.345806	0.498771										0.287719	0.835396	0.536981	0.178073	0.30177	0.622121
		0.778279	0.298079	0.704141	0.15382	0.538458	0.417887										0.387128	0.479574	0.517456	0.120873	0.574368	0.346576
		0.305349	1.59779	0.28644	0.561487	0.154359	0.577535										0.37995	0.323541	0.0838875	0.289627	0.249741	0.582901
		0.228562	0.456428	0.654461	0.833598	1.36986	0.323619										0.97732	2.25265	0.42576	0.139633	0.266809	0.286059
		0.464175	0.265105	0.375353	0.426106	1.31138	0.271544										0.240424	1.10927	0.242544	0.198388	0.258089	0.276649
		0.328449	0.338393	0.373009	0.527217	0.382895	0.845172										1.78455	0.0312493	0.329582	0.561274	1.05403	0.29863
		0.333308	0.416868	0.286504	0.78957	1.99102	0.548571										0.218017	1.48349	0.292724	0.280392	1.16615	0.236806
		1.00795	0.264098	0.280629	0.268168	1.09143	0.558281										0.263577	0.378285	0.513701	0.0686384	0.26668	1.43741
		1.28189	0.614563	2.16398	0.230138	0.541077	0.265172										0.355305	0.357731	0.506454	0.249785	0.879355	0.303089
		0.754455	0.240918	0.565383	0.287754	0.171988	0.345064										1.8619	0.403633	0.221961	0.00409254	0.613474	0.256798
		0.896353	0.194816	0.0525099	1.17343	0.864912	0.516533										0.582644	0.375701	0.220725	0.441432	0.472676	1.14876
		0.0153684	0.50476	0.469194	1.60122	0.867008	0.340154										0.465054	0.74355	0.569019	0.24353	0.912446	0.684958
		0.0605716	0.160292	1.06571	0.598925	0.215675	0.750627										0.553942	0.258903	0.372791	0.612024	0.236583	0.392275
		0.106005	0.537126	0.384276	0.265289	0.793851	1.09392										0.530631	0.276367	0.945281	0.295877	0.758794	0.54855
		0.308574	0.267392	0.571728	0.575949	0.245569	0.540521										0.572846	1.53969	0.631873	0.560226	0.267335	0.280775
		0.203331	0.27914	0.940039	0.34925	0.25153	0.944457										0.149475	0.478048	0.230839	0.263759	0.727557	1.06552
		0.535024	0.785785	0.279202	1.58507	0.3817	0.163573										0.457344	1.04981	0.288479	0.204383	0.213481	0.239173
		0.203987	0.605357	0.34052	0.0598342	0.767736	0.854228										0.861406	0.150359	0.430347	0.333364	0.0745434	0.689291
		0.967583	0.286666	0.0265929	0.551484	0.68092	0.360119										0.412759	0.841559	0.815164	1.90808	0.293549	0.792681
		0.111322	0.349468	0.691552	0.0425942	1.10612	1.06354										0.219849	0.258467	0.758819	0.486428	0.89523	0.278457
		0.0906799	0.0592772	1.31941	1.09579	0.881935	0.338515										0.589589	0.672785	0.70277	0.0892486	0.523158	0.436313
		0.259167	0.322147	1.02456	0.0388152	0.602097	0.823204										0.532293	0.326505	0.567175	0.596784	0.564431	0.0473309
		0.108579	0.237949	0.777986	0.015686	0.337303	1.39428										0.282553	0.35056	0.718926	0.65088	0.261223	0.821983
		0.59714	0.252664	0.608047	0.783878	1.34268	0.332842										0.621292	0.0116198	0.0569497	0.691568	0.0634127	0.38959
		0.157963	0.968285	0.459055	0.971187	0.763833	0.555891										0.567228	0.275381	0.5978	0.124757	0.249775	0.279693
		0.356389	0.426219	0.733042	0.26507	0.593671	0.380953										1.17914	0.417568	0.714072	0.0468979	0.384668	0.566004
		0.908159	0.294548	0.400327	0.57144	2.31231	0.740565										0.711046	0.326336	0.111092	0.619414	0.295279	0.301873
		0.495743	1.43351	0.42902	0.266792	0.535794	0.249016										0.255692	0.968017	0.289064	0.231609	0.214827	0.293579
		0.32414	1.16935	0.0740357	0.623489	0.370432	0.282608										0.233586	0.264881	0.416085	0.309825	0.356801	0.604383
		0.900323	0.193336	0.268633	0.407882	0.3859	0.636846										0.559024	0.220307	0.425083	0.335167	0.503905	0.307391
		1.37628	0.188989	0.511285	0.287044	0.589952	0.302113										0.63644	0.265382	0.266909	0.793657	0.12996	0.287219
		0.500349	0.356533	0.53353	0.249339	0.184116	0.559683										0.866906	0.259033	0.128744	0.714632	0.380972	0.302522
		0.538381	0.0199301	0.965954	0.21401	0.953285	1.0459										1.90385	0.520289	0.0380503	0.206621	0.143229	0.648211
		0.30465	0.661255	0.538959	0.403667	0.0575849	0.417457										0.278152	0.28873	0.29584	0.285801	0.636046	0.477919
		0.158359	0.81482	1.03868	0.228875	0.586855	0.949212										0.0442541	0.861772	0.266136	0.553403	0.331452	0.0732337
		0.505571	0.561648	0.754279	0.533549	0.619428	0.582917										0.886814	0.145016	1.12263	0.172521	0.726688	0.264798
		1.93914	0.566217	0.0571353	1.33483	0.202358	0.444472										0.875879	1.33335	0.809451	0.53714	1.32555	0.0440626
		0.31538	0.277084	0.446428	0.843319	0.598503	1.5207										0.248265	0.286505	0.108434	0.325763	0.490187	0.589559
		0.244318	0.290223	0.682544	0.00198716	0.608899	0.405969										0.378925	0.399546	0.954847	0.910138	0.0604528	0.247318
		0.994754	0.360681	0.365582	0.502197	1.64798	0.296329										0.961466	0.566655	0.215664	0.53419	0.544285	0.66416
		1.30186	0.251891	0.492676	0.274499	1.03237	1.11514										0.0286562	0.298868	0.332979	0.522239	0.214505	0.46325
		0.262191	0.322116	0.537017	0.037673	0.68873	0.757276										0.0803487	0.388612	0.402044	0.253695	0.242537	0.490228
		0.572332	0.775124	0.891229	0.110693	0.0337535	0.353849										0.048031	0.149089	0.330264	0.307129	0.304661	0.106113
		1.15174	0.225447	0.279699	0.488834	0.232096	0.227878										0.577202	0.211172	0.527266	0.363146	0.0221369	0.498391
		0.264059	0.447288	1.13892	1.51418	0.571693	0.226699										0.490873	0.0234985	0.627284	0.125836	0.347461	0.512942
		0.0751844	0.620058	0.586171	0.695271	0.837278	0.0162969										0.352309	0.0553114	0.332688	0.284942	1.07785	0.269762
		0.236802	1.33627	0.0578651	0.569679	0.36218	0.496231										0.578006	0.358147	0.369198	0.320333	1.18225	1.34393
		0.423665	0.868182	0.264238	0.570206	0.769349	0.620019										0.314934	1.04141	0.600689	0.445356	0.371357	0.328569
		0.255933	0.437748	1.06849	0.584462	0.56001	0.368463										1.80562	0.0340611	0.595867	1.1169	0.273209	0.0992568
		1.32531	0.89343	0.17699	0.276161	0.0599818	1.23283										0.816471	0.274623	0.300122	0.739699	0.368245	0.228386
		0.362218	0.305807	0.211126	0.278703	0.20242	0.452418										0.191369	0.533361	0.00469773	1.46203	0.147493	0.510152
		0.244246	0.41252	0.33468	0.84334	0.596741	0.841068										0.331676	0.3165	0.258824	0.244173	0.879061	0.272461
		1.62289	0.514197	0.328055	0.274952	0.388128	0.403678										0.425904	0.547268	0.846982	0.476331	0.054208	0.75882
		0.463985	0.352247	0.463557	1.12347	0.0630356	0.555797										0.543708	0.200347	0.754274	0.0819641	1.32275	0.445332
		0.828458	0.646818	0.274055	0.261334	0.282745	0.893637										0.511593	0.714117	0.389026	0.80421	1.06295	0.24388
		0.497612	0.230253	0.377612	0.856935	0.257447	0.265873										0.283152	0.556982	0.223939	0.0863629	0.387902	0.280423
		0.290297	0.180246	0.573054	0.212073	0.535014	0.522661										0.281324	0.479004	0.359334	0.320103	0.163406	0.699428
		0.648775	0.333851	0.223421	0.0504345	0.600101	1.51448										0.0581055	0.150893	0.330259	0.205345	0.136332	0.622664
		0.811985	0.0748104	0.757927	0.203478	0.295042	0.3607										0.831677	0.100053	0.0285583	0.304171	0.305249	0.494995
		0.369793	0.512564	0.541101	0.312771	0.0188385	0.822724										0.0317329	0.37015	0.914087	0.508424	0.673963	0.316157
		0.299595	0.448906	0.0961213	0.0585741	0.327828	0.288721										0.0407799	0.385633	0.234239	0.828419	0.579673	0.853287
		0.256037	0.363169	0.295967	1.42071	0.614102	0.040239										0.365481	0.503084	0.75354	0.872696	0.527872	0.351903
		1.57735	0.308012	0.337474	0.523168	0.542633	0.131365										0.38511	0.379382	0.512628	0.306348	0.248039	0.0350816
		0.210977	0.294406	0.640846	0.350517	0.515627	0.304568										0.32643	0.295778	0.29253	0.294629	0.380624	0.279073
		0.729515	0.855527	0.243834	0.576149	0.264248	0.793823										0.563447	0.747934	0.351627	0.494293	0.466801	0.403701
		0.746007	0.289002	0.580914	0.221272	0.23924	0.264309										0.258163	0.193784	0.349164	0.110384	0.194521	0.300772
		0.576036	0.44365	0.256497	0.0101553	0.242175	1.15513										0.448192	0.0735834	0.540446	0.159789	0.542852	0.209596
		0.56416	1.08027	0.598555	0.200823	0.422638	0.36532										0.515353	0.358758	0.368195	0.606399	0.0448326	0.246469
		0.650615	0.0367292	0.229888	0.169931	0.935032	0.280422										0.476292	1.33744	0.526861	0.646382	0.67931	0.303148
		0.963752	0.215426	0.286848	0.286499	0.535952	1.14176										0.190186	0.491597	0.807739	0.183994	0.202356	0.35607
		0.554015	0.82804	0.177437	0.739156	0.268111	0.9784										0.14046	0.8486	0.029541	0.331023	0.619755	0.559339
		0.959486	0.444692	0.297063	0.545885	0.0425857	0.545698										0.649416	0.314342	0.972243	0.236839	0.590637	0.35591
		0.559402	0.37868	0.466729	0.635934	0.744205	1.0784										0.210872	0.00692366	0.607454	0.263681	0.382389	0.201468
		0.532652	0.38575	0.0199365	0.406798	1.24925	1.0588										0.554351	1.19922	0.264187	0.38479	0.61133	0.126383
		0.781465	0.263853	0.242148	0.644919	0.599279	0.395203										0.284846	0.588598	0.0642561	0.333134	0.35368	0.373426
		0.264335	0.481218	0.216187	0.159308	0.013642	0.821936										0.46671	0.0287581	0.122588	0.207038	0.145718	0.330504
		0.950885	0.0331361	0.443985	1.16147	0.608907	1.17403										1.44309	0.672357	0.48768	0.52201	0.263677	0.488385
		0.739089	0.431459	0.808889	0.442437	1.06645	0.450459										0.440059	0.0407847	0.537133	0.192905	0.490858	0.312368
		0.369669	0.300225	0.271516	1.68177	0.792391	0.323026										0.412963	0.412897	0.118948	0.237685	0.403119	0.300431
		0.664743	1.6968	0.747244	0.489844	0.359611	0.779953										1.50119	1.01093	0.587044	0.367116	1.61215	0.291995
		0.550011	0.267088	0.616747	1.21047	0.775496	0.784695										0.339888	0.580589	0.299965	0.0244278	0.218827	0.474029
		1.09877	0.704551	0.506592	0.381545	1.08814	0.960484										0.298918	0.808124	0.340497	0.243858	0.309183	0.209428
		0.747763	0.0536887	1.31439	0.16718	0.562634	0.118469										0.830476	0.178207	0.692991	0.593463	0.251787	0.333735
		0.341063	0.593055	0.683406	0.943742	0.254926	0.241927										0.29986	0.589271	0.71151	0.251669	0.7686	0.675022
		0.817218	0.317906	0.0495891	1.2842	1.053	0.890915										0.214238	0.224502	0.798632	0.159052	0.303069	0.958065
		0.48348	0.448906	0.0387946	0.624266	0.226522	0.870678										0.634023	0.552564	0.658808	0.31168	0.407351	0.878704
		0.164782	0.259756	0.306077	0.591781	0.630034	0.0272548										0.0120109	0.360943	0.24842	0.831253	1.13932	0.371175
		1.32102	0.04037	0.78476	0.279576	1.03938	0.583837										0.2041	0.301519	0.270864	0.172542	0.305159	0.236358
		0.95876	0.25082	1.07155	0.399232	0.286989	1.51193										1.12057	0.800049	0.120175	0.286412	0.157858	0.338647
		0.48431	0.167838	0.563416	1.10901	0.264323	1.07475										0.542473	0.322656	0.0833597	1.03539	0.353347	0.5684
		0.526586	0.433813	0.520822	0.0648911	0.782746	0.525521										1.00567	0.0740633	0.534973	0.407387	0.486379	0.43871
		0.292153	0.53659	0.0616375	0.346382	0.335932	0.0411893										0.223192	1.00814	0.277792	0.0810468	0.263055	0.616116
		0.462554	0.465059	0.170489	0.190918	0.331988	0.286017										1.27921	0.292192	0.470964	0.0291748	0.275225	1.06486
		0.27147	0.295368	0.732283	0.277076	1.15405	0.6784										0.0169484	0.363707	0.326393	0.377162	0.474761	0.330932
		0.222341	0.305503	0.635821	1.36202	1.34096	0.496591										0.317872	0.727952	0.128837	0.526117	0.18111	0.248623
		0.0767423	0.261117	0.242851	0.754922	0.533332	0.582748										0.786483	0.190684	0.396116	0.210362	0.45222	0.293152
		0.598329	0.336795	0.264945	0.29459	0.325562	0.609431										0.608348	0.568999	0.980911	0.287944	0.859321	0.175467
		0.525217	0.259511	0.208823	0.557785	0.971384	0.309771										0.602812	0.0055542	0.0204438	0.208104	0.830389	0.348479
		0.301834	0.605176	1.18363	0.131659	0.677045	0.871123										0.363935	1.3711	0.356428	0.475067	0.392213	0.835348
		1.09197	0.91121	0.384033	0.347621	0.502139	0.215271										1.54899	0.341907	0.0713377	0.22472	0.545482	0.762062
		1.08976	0.264075	0.577528	1.57218	0.42524	0.558311										0.24176	0.303265	0.0737814	0.407003	0.3582	0.171749
		2.26572	0.499067	0.307864	0.52507	0.733692	0.0378136										0.0697031	0.712125	0.0199335	0.248466	0.185349	0.247357
		0.0649193	0.383775	0.0938511	0.0635923	0.161263	0.316534										0.28583	0.389861	0.854543	0.537038	0.520742	0.736859
		0.717834	0.268214	0.268212	0.829448	0.89931	0.640402										0.242112	0.977179	0.182906	0.567129	0.349179	0.133462
		0.428621	0.807488	0.633143	0.0836182	0.47949	0.229683										1.1298	0.335941	0.285322	0.192281	0.321345	1.11303
		0.535967	0.909898	0.155644	0.830278	0.393619	0.553075										0.924556	0.296299	1.34014	0.72051	0.596358	0.246205
		0.663582	0.367948	0.879796	1.28969	1.01252	0.508899										0.558086	1.15039	0.335888	0.572717	0.416533	0.263007
		0.609491	1.04961	0.288208	0.272839	0.329103	0.283811										0.238234	1.34528	0.51456	1.30358	0.266274	0.218585
		0.228931	0.394833	0.766579	0.446524	0.943971	0.458191										1.36684	0.26676	0.35059	0.381204	0.529373	0.315581
		0.721198	0.21767	0.957153	0.014395	0.721513	0.418013										0.364362	0.224096	0.245435	0.251388	0.277411	0.0871514
		0.729178	2.27319	0.582234	0.341288	0.142847	0.164002										0.552224	0.219543	0.783549	0.490653	0.247971	0.795948
		0.056947	0.247679	0.778915	0.731198	0.605445	0.36345										0.778718	0.516401	0.57382	0.808784	0.744084	0.451717
		0.536113	0.191514	0.906317	0.515518	0.761716	0.277579										0.57415	0.866912	0.423852	0.304909	1.16541	0.451508
		0.870194	0.888108	0.836747	0.199855	0.308145	0.532547										0.465606	0.315513	0.796685	0.281599	0.482592	0.0154419
		0.168898	0.587055	0.840887	0.47036	0.1574	0.697055										0.241211	0.30401	0.27023	0.572479	0.445169	0.362103
		0.560106	0.331747	0.0386963	0.332735	0.2636	0.641856										0.288782	0.284085	0.526564	0.0604542	0.589532	0.293873
		0.272791	0.3863	0.799384	0.551222	0.510234	0.0180639										0.845328	0.190616	0.625127	0.470675	0.0336944	0.31333
		0.534566	0.0626859	0.279815	0.576722	0.119556	0.247292										0.60999	0.0367537	0.184191	0.518341	0.26608	0.493262
		0.332233	0.185946	0.457896	0.470855	0.191345	0.851222										0.233971	0.717986	0.28583	0.66604	0.226892	0.481947
		0.714717	0.537721	0.507936	0.382684	0.171771	0.0345881										0.539795	0.096885	0.543267	0.516188	0.753634	1.70036
		1.37656	0.0137939	0.0173958	0.230675	0.628367	0.582113										0.380543	0.590684	0.25708	0.251473	0.36355	0.3345
		0.253569	0.0886841	0.534451	0.244665	0.314943	0.75471										0.829537	0.1593	0.0498768	0.312427	0.248176	0.602537
		0.246434	0.108128	1.14943	0.725675	0.44967	0.230603										0.352741	0.371719	0.136338	0.57322	0.253331	0.88796
		0.267723	0.538739	0.349949	1.32987	0.522869	0.942407										0.239584	0.848807	0.2854	0.283389	0.396982	0.719305
		0.241306	0.310918	0.255171	0.536712	0.618467	0.15391										0.612459	0.277319	0.306803	0.726561	0.28573	0.488712
		0.231514	0.278649	0.513598	0.520069	0.148873	0.29569										0.247326	0.306463	0.318355	0.56046	0.427468	0.0554456
		0.850736	0.287877	0.285239	0.27417	0.268576	0.606025										0.745016	0.141508	0.262018	0.684497	0.448608	0.381309
		0.70251	0.0705705	0.637465	0.287687	0.615225	0.29567										0.596597	0.282144	0.649346	0.15192	0.335728	0.326448
		0.98629	0.222295	0.277649	0.545743	0.513274	1.13971										0.1254	0.516448	0.117235	0.970381	0.834295	0.298746
		0.296314	0.28287	0.218154	0.573058	0.798561	0.326965										0.373522	0.392732	0.238482	0.294235	0.237185	0.20035
		0.347439	0.177044	0.28529	0.746188	0.968842	1.60121										0.85102	0.38625	0.187155	0.365689	0.340795	0.0335134
		1.20085	0.522624	0.654273	0.353085	0.516805	0.555256										0.0230025	0.354556	1.33331	0.261127	1.04892	0.268913
		1.67184	0.586666	0.545795	0.296086	0.141804	1.07883										0.79961	0.32739	0.590944	0.566556	0.212769	0.320063
		0.411063	0.507253	0.648896	0.12831	0.738797	0.752355										0.0714833	0.755046	0.578598	0.5051	0.0558373	0.269858
		0.26747	1.7009	0.180031	0.185384	0.356812	0.753951										0.865908	0.3451	0.384878	0.600841	0.435135	0.281154
		0.161773	0.126329	0.350417	0.737598	0.555663	0.523082										0.512678	0.89525	0.346274	0.451256	0.39504	0.0903823
		0.262724	0.404706	0.562514	0.78118	1.32383	0.34374										0.252997	0.0189882	0.553914	1.27593	0.529261	2.12082
		0.620327	0.547125	0.518484	0.589232	0.557086	0.475116										0.545473	0.505745	0.563643	0.550598	0.0125732	0.264776
		0.0484756	0.308544	0.541451	0.854939	0.159467	0.535789										2.3462	0.413695	0.251786	0.230767	1.34772	0.0662067
		0.336851	0.82421	0.415849	0.414575	0.585982	0.575024										0.220181	1.04475	0.479546	0.199427	0.244427	0.0268861
		0.779217	1.13702	0.49591	0.579773	1.25119	0.243862										0.623256	0.365062	0.145688	0.162303	1.33347	0.482383
		0.239868	0.575017	0.831747	0.796148	0.196247	0.925091										0.0783482	0.158278	0.29695	0.302288	0.410803	0.0424127
		0.807364	0.498767	0.560863	0.0404332	0.208654	0.16539										1.10449	0.661301	0.329506	0.423764	0.281798	0.0465216
		0.369273	0.572081	0.989876	1.29785	0.829226	0.945204										0.411468	0.757612	0.367901	0.35417	0.412459	0.362874
		0.507958	0.883808	0.287838	0.749123	0.240361	0.568389										0.355877	0.291326	0.354553	0.561738	0.509599	0.413503
		0.328694	0.497999	0.359314	0.282128	0.536712	0.925549										0.655674	0.135056	0.538398	0.221043	0.261926	0.242355
		0.278053	0.289314	0.514569	0.553236	0.762932	0.757021										0.040225	0.207809	0.608232	0.564546	0.297208	1.07747
		0.452084	0.726756	1.05546	0.232444	0.274446	0.274989										1.1643	1.54961	0.349566	0.378125	0.50346	0.202026
		1.07242	0.204786	0.343347	0.930191	0.863145	0.487275										1.76201	0.371966	0.166931	0.288599	0.516568	0.513112
		0.0518188	1.42278	0.713416	0.581526	0.268966	0.129196										0.39087	0.113968	0.962805	0.865068	0.613067	0.279827
		1.266	0.220825	0.532811	1.11524	0.784531	0.643456										0.0976076	1.35239	0.192681	1.10391	0.0343599	0.534118
		1.24627	0.33076	0.0251924	0.183288	1.22533	0.951788										0.129647	0.479204	1.03919	0.38065	0.451474	0.154394
		0.672171	0.427689	0.61053	0.257595	0.258192	0.311695										0.563842	0.598143	0.689736	0.414401	0.189731	0.274989
		0.367744	0.381925	0.272888	0.235597	0.519134	0.993294										0.825025	0.0330811	0.157693	0.271047	0.462947	0.430119
		1.3636	0.998367	0.0848505	0.282106	0.484716	0.311273										0.631788	0.315498	0.954809	0.544079	0.0220337	0.164736
		0.158193	0.539933	0.509871	0.823604	2.71548	1.13858										0.248914	0.0474469	0.3825	0.208195	0.364301	0.531757
		1.04713	0.507683	0.50585	1.316	0.587569	0.594377										1.10747	0.26434	0.73169	0.345124	0.835815	0.220947
		0.615987	0.645827	0.486383	0.402385	0.378863	0.850835										0.148558	0.524574	0.666918	0.55754	0.303566	0.208695
		0.2901	0.529864	0.509603	0.510588	0.352134	1.33888										0.813895	0.407886	0.425452	0.733879	0.0274205	0.344579
		0.794077	0.133936	1.0388	0.295091	0.763029	0.540504										0.757584	0.316481	0.505885	0.344793	0.246854	0.0467437
		0.629572	0.532244	0.299746	0.423112	0.805103	0.219381										0.680882	0.172718	1.06668	0.26792	0.912193	0.555412
		0.411275	0.525468	0.0657959	0.567471	0.556122	0.291966										0.259253	0.140455	0.0739568	0.166403	0.399318	0.180843
		0.545464	0.120258	0.303898	0.520896	1.07344	0.0709098										0.518123	0.401696	1.10151	0.252827	0.845967	0.360287
		0.729341	0.542242	0.567317	1.25537	0.289211	0.874358										0.544955	0.49056	0.262186	1.42274	0.209234	0.672842
		0.418033	0.329409	0.602029	0.204407	0.3169	0.822407										0.747609	0.158631	0.299458	0.359311	0.274722	0.33476
		0.358964	0.564852	0.536834	0.266724	0.734132	0.121107										0.0208772	0.427243	0.730743	0.353332	0.380843	0.203666
		0.761912	0.390092	0.578056	0.194248	1.55024	0.827085										0.130282	0.343987	0.534365	0.437037	0.540185	0.412798
		0.770502	0.261088	1.12027	0.58808	1.04585	0.326263										1.17	0.884099	0.579615	0.732925	0.17211	0.35507
		0.236332	0.431019	0.310857	0.249532	0.263343	0.18819										0.266809	0.725813	0.290538	0.866986	0.276702	0.186241
		0.628138	0.234646	0.493189	1.08486	0.496567	2.19428										0.846424	0.246252	0.908109	0.527706	0.5446	0.0625954
		0.648018	0.190421	0.306006	0.259864	0.0853793	1.09227										0.176704	0.859615	0.601557	0.364945	0.293169	0.288202
		1.06116	0.378693	0.0237724	0.495071	0.759547	0.726764										0.254268	0.771076	1.07932	0.508081	2.15069	0.472647
		1.10929	0.404851	0.62278	0.085083	1.42339	0.273098										0.722443	0.0595788	0.371369	0.991013	0.41766	0.805256
		0.0919008	0.119869	0.706456	0.242176	0.795002	0.221244										0.315295	1.0337	1.13728	0.497613	0.525565
		0.267806	0.0372717	0.302463	0.395643	0.157151	0.0936833										0.16919	1.55828	0.427126	0.348293	0.28915
		0.090596	0.258694	0.822226	1.47367	0.433033	0.40678										0.369083	0.240477	0.133534	0.438143	0.419279
		0.644508	0.214939	0.0205308	0.290391	1.15849	0.255981										0.898669	0.552387	0.0807933	0.638082	0.737765
		0.391001	0.207395	0.0396334	0.801392	0.287715	0.0292269										0.817104	0.440419	0.345537	0.674275	0.790031
		0.104353	0.453384	0.436207	1.0204	0.374238	0.304418										0.401343	0.662977	0.441546	0.265782	0.207421
		0.884441	1.08514	0.372696	0.557093	0.77747	0.81289										0.586687	0.120627	0.217933	0.512279	0.580937
		0.981047	0.763926	0.889777	0.546828	0.596358	0.518774										1.04785	0.366297	0.309732	0.817657	0.732445
		0.217518	0.313965	0.552792	0.413017	0.116942	0.0730422										0.563263	0.483259	0.088874	1.09667	0.0556801
		0.335128	0.185748	0.835181	0.306337	1.3738	1.12219										1.35456	0.361392	1.01823	0.278462	0.38825
		0.144713	0.437283	0.576603	0.476703	0.901788	0.0531271										0.580943	0.337532	0.0373535	0.809984	0.783814
		0.49651	0.282308	0.468206	0.59333	0.562578	0.367638										0.79761	0.855964	0.34868	0.620996	0.930566
		0.756051	0.0622282	0.533658	0.369517	0.134244	0.817203										0.223836	0.52528	0.902886	0.382392	0.347852
		1.35625	0.624871	0.48916	0.554567	0.296215	0.592214										0.283837	0.405513	0.159905	0.69817	0.279304
		0.267466	0.543237	0.582566	0.323412	1.00763	0.278159										0.75394	0.57195	0.348227	0.176486	0.791467
		0.424258	0.570893	0.482624	0.83755	0.358346	0.400827										0.0794726	0.234601	0.275084	0.47527
		1.03394	0.33711	0.612976	0.499533	0.327225	1.48613										1.43724	0.262342	0.412882	0.791359
		1.12341	0.350422	0.550534	1.06752	0.582914	0.544499										0.634493	0.483687	0.0413111	0.450597
		0.47737	0.935834	0.554516	0.544377	0.987253	0.611924										1.48644	0.258165	0.456618	0.334791
		0.3859	0.376991	0.252103	1.2882	0.918948	1.45678										0.364047	0.132813	0.337313	0.784583
		1.44282	0.0512264	0.657349	0.70158	0.398315	1.87874										0.856069	0.624871	0.266017	0.564027
		0.397493	0.421015	0.14218	1.06586	0.374891	0.951936										1.06665	0.576843	1.43192	0.380016
		0.995344	0.54217	0.660988	0.179364	1.08852	1.329										0.0264512	0.420151	0.0890871	0.851873
		0.0161668	0.442244	0.247246	0.358066	0.31642	0.726487										0.53577	0.731635	1.29651	0.245822
		0.36448	0.221642	0.582946	1.40211	0.299495	0.382463										0.23384	1.06665	0.0689495	0.733502
		0.254818	0.0156618	1.02207	0.038807	0.632979	1.05176										0.681685	0.632366	0.169292	0.300572
		0.310885	0.0794741	1.69844	0.682594	0.385587	0.408374										0.598651	0.283368	0.557324	0.382638
		0.100597	0.470139	0.288717	0.586432	0.464432	0.456767										0.26165	0.0573664	0.630459	0.151733
		0.243241	0.0171199	0.512061	0.697205	0.854594	0.949046										0.547933	0.304768	0.254856	1.32621
		0.0370483	0.376674	0.502695	0.651295	0.013213	1.42509										0.430119	0.237271	0.622385	0.285908
		0.22328	0.524317	0.288936	0.538052	0.428422	0.3303										0.457311	0.28666	0.504933	0.318285
		1.13803	0.5108	0.54203	0.246719	1.34098	0.555947										0.157738	0.71062	0.197851	0.232308
		0.917611	0.974674	1.3559	0.389003	0.569248	0.560428										0.260196	0.542783	0.26153	0.261699
		0.0951589	0.493438	1.19435	0.249206	0.977481	0.356492										0.39882	0.166111	1.1386	0.458344
		0.180774	0.0519712	0.253276	0.503499	0.214273	1.15576										0.085421	0.400873	0.432265	0.219262
		0.814885	0.269343	0.498912	0.340688	0.236591	0.827297										0.295508	0.531881	0.236184	0.347853
		0.425785	0.186409	0.535678	1.06871	1.02783	0.267731										0.0458836	0.230161	0.254346	0.415836
		0.613179	0.266761	1.20195	0.19067	0.0122862	0.372286										0.33073	0.240093	0.191962	0.296461
		0.2271	0.44271	0.0037684	0.527313	0.495736	0.409882										0.861011	0.371507	0.267971	0.338568
		0.815635	0.345945	0.839446	0.257104	1.07827	0.567557										0.313657	0.387624	0.27852	0.274248
		0.22552	0.896444	0.75288	0.386442	2.00949	0.755832										0.829013	0.248352	0.297518	0.469675
		0.21452	0.636793	0.0613092	0.327008	0.824166	1.33547										1.33358	0.851354	0.0739504	0.214054
		0.437171	0.674343	0.23897	0.382562	0.540844	0.270818										0.0231934	0.349243	0.602562	0.0701149
		0.39325	0.358719	1.04298	0.20389	0.814615	0.68187										1.35977	0.561072	0.249974	0.379823
		0.308197	0.669936	0.384129	1.37332	0.347314	0.273766										0.32435	0.562439	0.676165	1.10537
		0.030051	0.265916	0.0788361	0.264966	0.456827	0.831342										0.287164	0.525662	0.037124	0.069927
		0.2439	0.696572	0.19121	0.592758	0.0200583	1.276										0.334817	0.40938	0.533007	0.233933
		0.263839	0.378735	1.09066	0.487307	0.43304	0.114812										0.488886	0.302573	0.254026	0.746297
		0.445163	0.215077	0.243171	0.324402	1.66506	0.680285										0.573396	0.277207	1.06719	0.564442
		0.419522	0.153025	0.303145	0.232006	0.782306	0.230225										1.09705	0.459498	0.841466	0.277181
		0.036539	0.184328	0.590105	0.614289	0.561277	0.309378										0.423936	0.383833	1.04785	0.360223
		1.31673	1.59564	0.676614	0.717588	0.239163	0.0241611										0.601597	0.46134	0.0145679	0.0356046
		0.576206	0.318505	0.0577717	0.751415	0.484781	0.613319										0.0359717	0.107667	0.503712	0.525958
		1.29214	0.134956	1.08445	0.588835	0.494995	0.979152										1.09808	0.240973	0.307655	0.0556834
		1.79197	0.276843	0.5674	0.538497	1.36503	0.868791										0.0282927	0.2228	1.37121	1.54985
		0.426865	1.04109	0.233816	0.709741	1.26991	1.61726										1.20122	1.3593	0.535743	0.590331
		2.71296	0.53894	0.576561	0.128728	1.66687	0.846414										0.614464	0.177387	0.397314	0.131689
		0.955038	0.0545712	1.12834	0.235504	0.956444	0.249811										0.776425	0.529864	0.932682	0.432318
		0.12289	1.4407	0.245489	0.819336	0.361019	0.793594										0.618722	0.148317	0.31327	0.279434
		0.42863	0.357975	0.104978	0.335227	0.578647	0.826091										0.867328	0.155946	0.266842	0.47733
		0.389227	1.92984	0.266724	1.2872	0.242037	0.453852										0.35004	0.594081	0.461496	0.160993
		0.840529	0.743918	0.265625	0.264089	0.343633	0.253434										0.485661	0.313511	0.0297957	0.448994
		0.374238	0.336062	0.591091	0.374883	0.845404	0.843165										0.0127428	0.842541	0.54805	0.0101171
		0.555026	0.271447	0.780229	0.479093	1.07322	0.0509244										0.765802	0.967437	0.257029	0.375837
		0.534661	0.252041	0.691763	0.29566	0.654332	0.571376										0.451521	0.560226	0.268006	0.611056
		0.184362	0.211698	0.264889	1.64786	0.59464	0.274086										1.13203	1.06348	0.261897	0.615499
		0.284353	0.134225	1.07986	0.102625	0.309152	0.175663										0.41287	0.843204	0.25107	0.0431965
		0.474102	0.241181	0.251943	0.211792	1.93522	0.253156										0.4736	0.104092	0.382535	0.653311
		0.697021	0.57349	0.52094	0.523734	0.373539	0.759555										0.444664	0.0167131	0.297974	0.581521
		0.625887	0.510989	0.565527	0.360761	1.07459	0.255372										0.969551	2.18624	0.0916888	0.737075
		0.916614	0.260069	0.264362	0.151951	0.535058	0.458655										0.0427072	0.0220137	0.0275879	0.447207
		0.730809	0.283003	0.131501	0.355834	0.50914	0.578933										0.46158	0.298652	0.351235	0.245488
		0.833654	0.305327	0.423136	0.636772	0.815765	0.279769										0.0825417	0.32423	0.131223	0.474124
		0.71577	0.0997626	0.758815	1.73175	0.229465	0.886325										0.812935	0.273102	0.243809	1.35165
		0.234981	0.0220137	0.817681	0.538344	0.538924	0.920983										1.09274	0.248218	0.983308	0.433529
		0.0681554	0.712394	0.390578	0.213459	0.99676	0.389221										0.831358	0.21638	0.375471	0.349809
		0.869141	0.579587	0.778817	0.598887	1.34172	0.560721										0.434907	0.0838702	0.828233	0.259689
		0.307462	0.554553	0.940796	0.55321	0.187794	0.386116										0.554739	0.261607	0.898832	0.473041
		1.07446	0.208278	0.220183	0.223354	0.0345992	0.467942										0.371253	0.508705	0.461819	0.684271
		0.591632	0.539488	0.301015	0.215144	0.941452	0.549814										0.260381	0.382859	0.0440906	0.289399
		0.581721	0.0554206	0.34167	0.210534	0.577577	0.517211										0.252636	0.350347	0.242167	0.405344
		0.377034	0.308885	0.385944	0.559387	0.185142	0.809936										1.04773	0.921684	0.484148	0.538334
		0.431741	0.234748	0.27043	0.776855	0.565263	0.199068										0.108259	0.12146	0.358346	0.536661
		0.091505	0.213335	0.352975	0.356198	0.526027	0.687766										0.0172189	0.316255	0.11203	0.243772
		0.421831	0.453982	0.248999	0.707681	0.544096	0.614365										0.59034	0.664619	0.376591	1.11187
		0.843072	0.443774	0.425858	0.0310896	0.0533573	0.222411										0.176758	0.31769	0.462267	0.0552479
		0.251366	1.0166	0.481916	0.167381	0.504627	0.257581										0.20801	0.441745	0.25182	0.327271
		0.985319	0.150042	0.819417	0.321624	0.411368	1.39296										1.37351	0.185563	0.51551	1.13974
		1.81399	0.369266	1.089	0.975467	0.387641	0.734352										0.277929	0.351439	0.0423378	0.294359
		0.344189	0.422309	0.221934	0.318556	1.94421	1.18656										0.340752	0.777648	0.27145	0.59342
		0.401742	0.247538	0.305404	0.735841	0.38019	1.12734										0.423974	0.270854	0.734567	0.231699
		0.564149	0.268038	0.816496	0.353576	0.184805	0.659562										1.51491	0.270628	0.28473	0.139418
		0.526154	0.33936	1.36543	1.01697	0.225637	0.0279198										0.244912	0.221118	0.348638	0.0258433
		0.873113	1.03963	0.614881	0.0098877	0.932294	0.0418845										0.353987	0.593883	0.350413	0.26214
		0.247613	0.0897921	0.349105	0.34793	0.250173	0.253503										0.499969	0.258512	0.557129	0.2982
		0.927052	0.268138	0.252304	1.63912	1.13823	0.846369										0.0840442	0.176185	0.334197	0.558359
		0.338291	0.842658	0.816072	0.666898	1.13068	0.314946										0.52465	1.39842	0.40563	0.501271
		1.09936	0.521548	0.266907	0.595221	0.0726771	0.59878										0.799115	0.582591	0.375095	0.447838
		0.098814	0.711145	0.299899	0.253143	1.06594	0.870194										0.268809	0.362227	1.09914	0.182597
		0.572532	0.0335651	0.203775	0.749821	0.584626	1.46638										0.852357	0.515336	0.387534	0.336418
		0.266018	0.512252	0.346904	1.98771	0.196037	1.37241										0.041462	0.564056	0.484927	0.37015
		0.418324	0.788051	0.17922	0.34402	0.04718	0.617773										1.10381	0.0272832	0.256994	0.0566551
		0.232948	0.0858379	0.947177	0.838254	0.525471	0.391287										1.01641	0.522169	0.578401	0.208064
		0.261366	0.47727	0.450552	0.302466	0.183661	0.156738										0.0481069	0.493248	0.536276	0.00711157
		0.906623	0.422655	0.585868	0.853332	0.300781	0.390755										0.494897	0.0844473	0.568671	0.34533
		0.0461563	0.285947	1.09224	0.589124	1.02465	0.777446										0.518188	0.348955	0.601614	0.644652
		0.333266	0.445745	0.0257719	0.980878	0.718468	0.53955										0.0327052	0.159446	0.138022	0.410663
		0.216899	0.766126	0.26081	0.309078	0.0337495	0.516279										0.377421	0.394722	0.184608	0.373126
		0.0485444	0.0398937	0.221092	0.559055	0.568294	0.875728										0.329235	0.241017	0.44479	0.192216
		0.312479	1.66502	0.535991	0.32592	0.0275879	1.1513										0.222735	0.349954	0.498102	0.754235
		0.449139	0.50207	1.02714	0.568737	1.1261	0.277821										0.521534	0.900161	0.589918	0.192628
		0.199803	0.251398	0.5818	0.334731	0.34342	0.441027										0.803789	0.3573	0.225192	0.250342
		0.305873	0.29272	0.49204	0.200846	0.601049	0.266675										1.01937	0.298483	0.708863	0.792745
		0.165903	0.0705061	0.894726	1.07295	0.833062	0.776869										1.00571	0.462508	0.588488	0.386911
		0.398067	0.615333	1.30378	0.710553	0.348745	0.754235										0.277907	0.328954	1.15552	2.59863
		0.838833	0.0794804	0.959904	0.337169	0.487438	0.151812										0.531094	0.34886	0.430814	0.711
		0.251917	0.358207	0.392719	0.177848	0.286201	0.780855										0.291073	0.844207	0.264946	0.215191
		1.43186	0.38828	0.132909	1.10452	0.369451	0.340387										0.102161	0.673442	0.678163	0.533856
		0.605126	0.0789538	0.903003	0.254411	1.02051	0.194679										0.35188	0.172159	0.363696	0.334793
		0.42742	0.278488	1.06283	0.135576	0.237722	0.582237										0.434641	0.206982	1.07559	0.0606061
		0.694077	0.216695	0.37475	0.461736	0.273613	0.237915										0.601975	0.477905	0.438007	0.964612
		0.714409	0.449013	0.52684	0.316326	0.687765	0.57373										0.649966	0.920424	0.29279	0.518738
		1.27853	0.390657	0.414099	0.0752725	0.0706943	0.0955933										0.77478	0.232268	0.833934	0.00610352
		0.272603	0.277284	0.0538641	0.484025	0.445735	0.469871										0.233293	0.385214	0.726946	0.308825
		0.147886	0.348254	0.258057	0.505615	0.936047	1.36835										0.615906	0.933915	0.314211	0.791565
		0.35537	0.729779	0.41538	0.574488	0.239765	0.0727592										0.317298	0.479901	0.797745	0.247291
		0.245972	1.70756	0.479896	0.0101436	0.196279	0.424879										0.387027	0.216032	0.913132	0.839796
		1.56521	0.625343	0.586316	0.279541	0.878705	0.193482										1.01584	0.34454	0.6154	0.949244
		0.450458	0.237056	0.65125	1.09597	0.231152	0.122226										0.300744	0.278147	0.241802	0.211239
		0.693115	0.693144	0.789161	0.222736	0.271362	1.04085										0.647946	0.358217	1.62125	0.249087
		1.78897	0.893401	0.443138	0.255493	0.30019	0.783303										0.623569	0.712073	0.0221429	0.613257
		0.153624	0.155644	0.512591	1.77676	0.75915	0.778361										0.949441	0.0524902	0.521711	1.31844
		0.236825	0.37561	0.418082	0.27598	0.257985	0.493481										0.361296	0.495841	1.18775	0.249725
		0.146299	0.211532	1.62753	1.77692	0.34959	0.140053										0.349004	0.829689	0.508782	0.300528
		0.331084	0.109977	0.234024	0.30618	0.543469	0.278644										0.262457	0.34484	0.279842	0.297068
		0.227589	0.578403	0.262453	0.73246	0.0982959	0.302524										0.693614	0.16089	0.525676	0.334679
		0.367505	0.378962	0.58174	0.438479	0.737173	0.965074										1.10942	0.493414	0.297439	0.22096
		0.29657	0.908663	0.696359	0.721924	0.250424	0.590999										0.997007	1.39651	0.289146	0.684538
		0.206185	0.319778	0.0325821	0.50662	0.416135	0.433662										1.6951	0.612457	0.198196	0.0601331
		0.70499	1.04678	0.378044	0.274399	0.476076	0.442365										0.43811	0.386436	0.576959	0.567526
		0.617951	1.34922	0.626247	1.37892	1.19082	0.361372										0.280774	0.270855	0.776172	0.658794
		0.597786	0.520101	0.304124	0.321078	0.313734	0.50215										0.250246	0.231997	0.365155	0.574467
		0.417787	0.151589	1.08415	0.598198	0.0752352	0.409771										0.389031	0.49303	0.509592	0.792037
		0.372981	0.362174	0.434601	0.0265783	0.530216	1.10626										0.145596	0.261348	0.903236	0.529495
		0.307682	0.0351734	0.0419799	0.091737	0.564258	0.254829										1.29913	0.587799	0.272018	0.348141
		2.11345	0.19729	0.279004	0.420968	0.355946	2.07367										0.911063	0.27417	1.18367	0.33373
		0.743069	0.476125	0.314356	1.0274	0.511598	0.0965937										0.394342	0.380307	0.482676	0.269053
		1.18993	0.743464	0.792453	0.292067	0.305201	0.812531										0.735491	0.29473	0.211923	0.328881
		0.832328	0.359944	0.901588	0.221585	0.793868	0.315025										0.953089	0.326905	0.251046	0.278152
		0.392598	0.206864	0.363829	0.720182	1.36331	0.717407										0.45857	0.217579	0.948061	0.219442
		0.798792	0.838907	0.0778809	0.600277	0.25996	0.0751463										0.364276	0.951497	0.447408	0.354756
		0.348636	0.0960532	0.246165	0.5904	0.175239	0.380421										0.196031	0.514194	1.09169	0.583431
		0.494793	0.270133	0.29047	1.10694	0.704007	0.637385										1.5842	0.548562	0.0532486	0.602267
		0.279538	0.352816	0.348312	0.378781	0.34508	0.572316										0.282907	0.553075	0.222723	0.0277745
		0.274169	0.349672	0.953418	0.835479	0.535034	1.04832										0.585785	0.108369	0.795643
		0.965801	0.139076	0.0166034	0.838881	1.16305	0.539552										0.861097	1.11988	0.242606
		0.0993765	0.244806	0.476907	0.234258	0.529816	0.237061										1.20579	0.771522	0.532785
		0.0839419	0.0344965	1.18442	0.844349	0.283672	0.802943										0.195666	0.304069	0.318448
		0.363351	0.311364	0.29222	0.850091	0.367433	0.27745										0.0783927	0.510662	0.208262
		0.940194	0.589483	0.423465	0.575338	0.845288	1.52169										0.795734	0.915653	0.719988
		0.636876	0.551569	0.934778	1.132	0.462377	0.856765										0.270564	0.227219	0.76626
		1.07235	0.318022	0.268999	0.789778	1.0383	0.943649										0.384343	1.19917	0.344099
		1.17139	0.723499	0.0291327	0.484689	1.37097	0.565448										0.719756	0.832931	0.256057
		0.663109	0.0586564	0.164425	0.26078	0.581776	0.179292										0.612739	0.468239	0.536468
		0.29788	0.972011	0.158221	0.301346	0.272688	0.361092										0.0293414	0.611483	0.719302
		0.961314	1.48129	0.311038	0.812016	1.15861	0.296692										1.50393	0.0583684	0.49808
		0.428487	0.794724	0.496307	0.964387	0.410597	0.986492										0.265972	0.0168943	0.272863
		0.838912	0.45409	0.454906	0.487988	0.524053	0.349796										0.802618	0.409906	1.28201
		0.623059	0.266942	0.223126	0.293536	0.744488	0.502874										0.249942	0.350523	0.534136
		0.443438	0.240063	0.630634	0.850477	0.284719	1.09606										0.272469	0.243803	0.832829
		0.313741	1.17007	0.408984	0.537692	0.770383	0.380735										0.172899	0.306274	0.706881
		0.0390993	0.0351279	0.380997	0.789161	0.589636	0.567018										0.606084	0.101204	0.124221
		0.6141	0.0408212	0.619251	0.512512	0.249583	1.22288										0.273529	0.397063	0.354905
		0.359745	0.713191	0.41924	0.260876	0.461141	1.14208										0.548554	0.658676	0.0272429
		0.221758	0.733562	0.584003	0.591629	0.781054	0.262091										1.59414	0.778435	0.526775
		1.33352	0.505714	0.23518	0.80266	0.273209	1.15142										0.338114	0.213523	0.540739
		0.53695	0.0861184	0.139397	0.386192	0.633056	0.310595										0.237262	0.216214	0.118315
		1.5756	0.346302	0.374694	1.57499	0.282226	1.41943										0.0223855	0.213777	0.854421
		0.0612887	0.264587	0.0790787	1.20546	0.148077	0.182354										0.525093	0.777853	0.458797
		0.197247	0.311428	0.346321	0.380851	1.06652	0.587775										0.252944	0.250366	0.531708
		0.608531	0.561999	0.323733	0.552195	0.476501	0.81477										0.124996	0.898835	0.219085
		0.176341	0.587159	0.277344	0.967521	0.270176	0.346929										0.833443	0.226238	0.170332
		1.48611	0.281042	0.242985	0.357189	0.237338	0.430531										1.06128	0.390077	0.487543
		1.1832	0.567457	0.364364	0.333388	0.581988	0.513397										0.487854	0.304004	0.0390458
		0.868929	1.73071	0.402944	0.434949	0.374857	0.106431										0.241347	0.146973	0.563763
		0.255416	0.568704	0.0350534	0.308268	0.563538	0.0337524										0.265311	0.267023	0.270332
		0.532076	0.492452	0.571464	0.38737	0.389247	0.266554										0.255021	0.711918	0.779907
		0.192993	0.492313	0.478306	1.8263	0.788798	0.516476										0.961466	0.305561	0.786048
		0.543046	0.321497	0.333454	0.710655	0.546085	0.356692										0.279919	0.693544	1.34935
		0.568798	0.353071	0.196594	0.378155	0.804263	0.535813										0.227019	0.159572	0.119356
		0.217293	0.81428	0.44483	1.68995	0.838559	1.05601										0.174949	0.310043	0.0858783
		0.104335	0.750324	0.349846	1.01247	0.352658	0.803548										0.169808	0.437203	0.125638
		0.356088	0.451394	0.224393	0.139928	0.238492	0.855389										0.425485	0.268532	0.334843
		1.17084	0.204445	0.543853	1.57218	0.533337	0.339137										0.609233	1.05877	0.309912
		0.0567635	0.0123291	0.175795	0.828179	0.395881	0.59405										0.262154	0.658785	0.267689
		0.818059	0.644163	0.962793	0.188395	0.695048	1.12978										0.522744	1.0989	0.130341
		1.69798	0.1735	0.289819	0.709925	0.537629	0.848764										0.627728	1.16982	0.280396
		0.326597	1.00743	0.529908	0.495571	0.773867	0.589144										0.307279	0.018317	0.272813
		0.480068	0.260465	0.308029	0.289666	1.57659	0.801319										1.01116	0.319022	0.489969
		0.48764	0.257453	0.246475	0.270564	0.100108	0.801112										0.501458	0.38948	0.715998
		0.397328	0.30162	0.218645	0.535712	0.448364	0.847588										1.35399	0.359561	0.305348
		0.270534	0.761209	0.65991	1.1948	0.185656	0.178368										0.208984	0.0677601	0.288216
		1.34901	1.57678	0.328861	0.825585	0.211636	1.08135										0.245201	1.07236	0.215765
		0.619264	0.788635	0.582133	0.964367	0.278615	0.36004										0.454672	0.334673	0.264634
		1.98441	0.25556	0.981711	1.44859	0.305133	0.533325										0.91474	0.432121	0.533824
		0.318966	0.276367	0.20566	0.766969	0.255099	0.773285										1.0272	0.11736	0.0990005
		0.81963	0.417399	0.704712	0.32239	0.330589	1.56578										1.71755	0.353673	0.511993
		0.617276	0.39846	0.52956	0.435555	0.791899	0.281314										0.531565	0.0678311	0.277847
		0.90833	0.225185	0.364236	1.35761	0.726999	0.18392										0.499974	0.326522	0.423031
		0.255682	0.258166	0.722591	0.190207	1.0796	0.594296										0.338513	0.323016	1.31995
		1.19598	0.308021	0.166082	1.23177	0.156393	0.575286										0.424899	0.233203	0.560907
		0.34431	0.33505	0.306823	0.580311	1.71304	0.881202										0.5648	0.977536	0.232455
		0.310799	0.289523	0.357686	0.595466	0.394641	0.502694										0.767783	0.341903	0.896272
		1.92624	0.325596	0.542751	0.706458	0.595001	1.46554										0.0470848	0.284675	0.0878331
		0.373208	0.548515	0.0520364	0.84375	0.630784	0.530474										0.363865	0.982026	0.269776
		0.15809	0.241887	0.0117657	1.0056	0.567279	0.522263										0.262881	1.22329	0.0797111
		0.886468	0.046166	0.116117	0.157158	0.604796	0.307896										0.0280709	0.57165	0.522629
		1.21512	0.212684	0.499323	0.0411381	0.916787	1.19111										0.76848	0.331488	0.283775
		0.728889	0.314739	0.190481	0.483806	0.428251	0.767935										0.23738	0.720476
		0.323243	0.761476	0.273354	0.765964	0.209756	0.519159										0.362877	0.93613
		1.05661	0.269968	0.118356	1.00643	0.985619	0.83757										0.654868	0.69479
		0.43195	0.478841	0.18921	0.403772	0.430603	1.05523										0.0493971	0.835773
		0.913454	0.150884	0.662683	0.334002	0.489516	0.682239										0.397077	0.715643
		0.396751	0.251008	0.795997	2.004	1.3983	1.95683										0.553211	1.39222
		0.200278	0.235346	0.724191	1.05364	0.267778	0.430108										1.69523	1.42463
		0.37	0.178471	0.233324	0.33569	0.799927	0.414558										0.361462	0.507196
		0.0935301	0.556245	0.532316	0.574955	0.928798	1.42086										0.274067	0.899302
		0.509317	0.493835	0.957288	0.531679	1.8425	0.311417										0.032696	0.255501
		0.517605	1.03671	0.237508	0.543672	0.204887	0.569186										0.248732	0.457945
		0.271478	0.366297	0.529557	0.249058	0.173387	1.04202										0.441408	0.426928
		0.769563	1.67572	0.475638	0.100453	0.0624323	1.18185										0.941802	0.228385
		0.292614	0.142282	0.236754	0.315481	0.0770484	1.34389										0.603082	0.926875
		0.810314	0.2433	0.951491	0.614224	0.421987	0.592448										0.224235	0.205884
		0.728324	0.243095	0.679172	0.819646	0.640529	0.390147										0.694716	0.232096
		0.261959	0.606882	0.331103	0.610307	0.2882	1.15413										0.83359	0.213795
		0.744383	0.178504	0.270842	0.861954	0.293939	0.114637										0.18981	0.682555
		1.28662	0.25967	0.244575	0.307009	0.395485	0.599779										0.384584	0.0849066
		0.918589	0.27171	0.223448	0.22901	0.358334	0.0865393										0.786624	0.744163
		0.0299944	0.26088	0.275011	0.530426	0.264936	1.6148										0.134406	0.645954
		0.0207488	0.306489	0.666745	0.367176	0.518624	0.24036										0.858046	0.66229
		0.203205	0.315893	0.829847	0.818265	0.266968	0.168092										1.14777	0.82747
		0.443237	0.245509	0.261723	0.0755683	0.0270785	0.839706										1.56764	0.23221
		0.32639	0.393949	0.0740453	0.652057	1.32434	0.541188										0.340772	1.62797
		0.28455	0.305718	0.515994	1.63671	0.575025	0.246584										0.358806	0.258821
		0.552308	0.247728	0.532365	0.123191	0.22998	1.09984										0.773437	0.565873
		0.484434	0.256202	0.0267334	0.92873	1.32926	0.977754										0.361956	0.555173
		0.31715	0.298936	0.314729	1.32747	0.452814											0.518528	0.030574
		0.0856214	0.275045	1.38281	1.20198	0.499776											0.321969	0.961516
		2.17531	0.709588	0.55657	0.642764	0.363306											0.113249	0.279672
		0.218415	0.336777	0.511602	0.189363	1.60847											2.15387	0.386906
		0.168481	0.288876	0.461848	0.73269	0.533533											0.628499	0.778324
		0.0965101	0.4664	0.544487	1.07221	0.408497											0.284354	0.534353
		0.866322	0.361003	0.249254	0.602254	0.31471											0.753028	0.80687
		0.7758	0.601342	0.30824	0.477451	0.396694											2.52957	0.354603
		0.0851776	0.196078	0.0776644	0.403713	0.618785											0.434512	0.157532
		0.35149	0.165208	0.30406	0.744677	0.322568											0.891124	0.291112
		0.327267	0.358954	0.0784994	1.64961	0.342495											0.818455	0.199455
		0.739487	1.02606	0.259635	0.327943	0.586308											0.749764	0.301559
		0.257704	0.58766	0.42817	0.0976937	0.269326											0.486563	0.60496
		0.411651	0.155212	0.872812	0.49165	0.276718											0.100963	0.839275
		0.753189	0.647589	0.415854	0.53583	0.597291											1.08459	0.278044
		0.281379	0.576847	0.856572	0.0410156	0.0709229											0.870912	0.491551
		0.113623	0.046538	0.760131	0.372317	0.615159											1.06665	0.279068
		1.12015	0.498541	0.312559	0.223313	0.384526											1.43203	0.237361
		0.250945	0.352934	0.0244141	0.217651	0.249827											1.18854	0.534359
		1.00401	0.0372387	0.31135	0.589958	0.230967											0.200584	0.257015
		0.502787	1.24763	1.11297	0.480522	0.187728											0.194013	0.31535
		1.83032	0.176858	0.1749	0.625087	0.518618											0.0345992	0.943907
		0.796875	0.565707	0.476686	1.30588	0.372737											0.387476	0.476897
		0.147188	0.778062	0.0928097	0.185518	0.731772											0.298491	0.0490723
		0.234606	0.260185	0.361633	1.09948	0.674519											0.0395873	0.337462
		1.33998	0.47106	0.204102	0.468991	0.789597											1.20971	0.770127
		0.317106	0.252941	0.288063	0.795166	0.969262											0.39691	0.221562
		0.289623	0.0375138	0.273051	0.715714	0.506413											0.0814391	0.356134
		0.539069	0.217603	0.773779	0.538527	0.767907											1.22371	0.422277
		0.381459	0.508556	0.413165	1.19188	0.0274278											0.120648	0.372724
		0.0945179	0.23774	0.597681	0.280764	0.903539											0.270265	0.316266
		0.888889	0.6206	0.0752691	1.06667	0.0864638											0.464411	0.0681334
		0.844155	0.152311	0.11216	0.792345	0.987665											0.576027	0.34389
		0.755361	0.831855	0.950698	0.813142	0.189816											1.31695	0.253139
		0.629071	0.502797	0.40642	0.396077	0.140435											0.855862	0.433704
		0.334458	0.570364	1.88657	0.511415	0.751646											0.236805	0.252319
		1.22098	0.346287	0.622753	1.42625	0.101815											0.287763	1.0443
		0.267226	0.871299	0.268047	1.43543	0.947319											0.574151	0.560203
		0.837742	0.0457648	0.390639	0.53818	0.348289											1.36805	0.579383
		0.353916	0.162697	0.44397	0.474848	0.764391											0.546885	0.198733
		0.224517	0.556317	0.0319618	0.394537	1.47663											0.244222	0.104423
		0.1221	0.471063	0.176548	0.763972	0.537667											1.2814	0.108776
		0.458007	0.444995	0.588307	0.907274	0.750644											0.20922	0.296029
		1.33623	0.246362	0.346437	1.11781	0.192338											0.130734	1.88062
		0.238492	0.627862	0.481219	0.269317	0.404185											0.274365	0.111532
		0.389788	0.234635	0.338785	1.86005	0.606816											0.196531	0.917743
		0.612681	0.351993	0.0507166	1.43424	0.249278											0.599765	0.765285
		0.910168	0.304485	0.944684	0.629288	0.624282											0.359568	0.511475
		0.677682	0.754235	0.965598	0.250187	0.556486											0.383074	0.270869
		0.615522	0.318554	0.332338	0.212407	0.421468											0.0917374	0.170853
		0.215519	0.328246	0.245608	0.68167	0.453053											0.55681	0.0710146
		0.378524	0.264304	0.768164	1.00927	0.0112583											1.26424	0.183752
		0.0813664	0.468365	0.249048	0.338741	0.902356											1.11073	0.580999
		0.0690372	0.231822	0.528733	0.702228	0.533408											0.372196	0.227738
		0.224408	0.569394	0.361619	0.279887	0.375428											0.451452	0.214087
		0.331929	0.840754	0.747386	0.276458	0.551551											0.758216	0.257419
		0.25564	0.345608	0.375533	0.349416	0.932817											0.441195	0.322043
		1.11621	0.776367	1.28228	0.261106	0.265191											0.303467	0.334282
		0.342219	0.205238	0.243868	0.793457	0.451354											1.12221	0.283854
		0.799183	0.277667	0.137811	0.276579	1.32453											0.266602	0.241792
		0.357338	0.493517	0.561065	0.63465	0.880368											1.12803	0.414786
		0.772184	0.582981	0.0197109	0.233542	0.112175											0.356655	0.289884
		0.568835	0.154796	0.569879	1.0527	0.291293											0.650972	0.229727
		0.249081	0.362289	0.0849463	0.47908	0.891519											0.683124	0.50735
		0.858161	0.541989	0.577904	0.278836	0.355645											0.844206	0.0436656
		0.592123	0.0241728	1.12026	0.348697	1.21951											0.267298	0.351748
		0.897691	0.318187	0.505246	0.838946	0.812623											0.766744	0.131872
		0.596112	0.263809	0.147186	0.31455	0.492961											0.763046	0.587448
		0.324446	0.00758041	0.0185547	0.345924	0.037961											0.192206	0.230113
		0.669964	0.748989	0.375553	0.758916	0.275283											0.251783	0.284424
		0.21129	0.588505	0.3532	0.832024	0.844627											0.0178411	0.994294
		0.670239	1.00534	0.181317	0.3124	1.39056											0.939968	0.337624
		0.0671067	1.23022	0.757127	1.00804	1.73777											0.102373	0.0494449
		1.24131	0.78133	0.166421	0.0258789	0.352706											0.275232	0.0674118
		1.07264	0.0443722	0.18712	0.477512	0.456216											1.42745	0.267307
		0.259504	0.423724	0.337737	1.96446	0.837332											0.674721	0.452718
		0.249902	0.184741	1.29855	0.341239	0.656232											0.225538	0.362413
		0.2287	0.0222778	0.2027	0.838654	1.67602											0.961466	0.192644
		0.547029	0.266673	0.321537	1.11635	0.21998											0.0712833	0.244339
		0.21282	0.592551	0.501089	0.51625	0.575671											0.529755	0.552542
		0.27967	0.260795	0.354158	0.96169	0.743286											0.0611967	0.394399
		0.955267	0.280463	0.111529	1.63049	0.772766											0.886516	1.27498
		0.654675	0.818071	0.800316	0.83366	0.115416											0.430109	0.403563
		0.570397	0.357148	0.232691	0.6785	0.304454											0.644823	0.537964
		0.585784	0.372265	0.462443	0.278494	1.18863											1.61319	0.322341
		0.776367	0.559815	0.221289	0.0194307	0.675012											0.27877	0.249195
		0.438545	0.00333019	0.340462	1.28589	0.73415											0.188234	0.542054
		0.262166	0.341021	0.282779	0.213601	0.265833											0.672075	0.273731
		0.359881	0.543636	0.191634	0.626477	0.0597992											0.506265	0.237795
		0.304306	0.0607566	0.190604	0.575674	0.142978											0.792965	0.32802
		0.238877	1.07231	0.918586	1.00887	0.706189											0.265821	0.538141
		0.374666	0.105411	0.273656	1.3787	0.535998											0.76377	0.32536
		0.774704	0.577316	0.183781	0.658507	0.491493											1.70282	0.533532
		0.889177	0.354762	0.271722	0.456604	0.375955											0.22931	1.09988
		0.527382	0.267413	0.533739	0.455492	0.0592374											0.0439954	0.601364
		2.02884	0.156096	0.599102	0.742498	1.19979											0.52398	0.0191542
		0.324489	0.587321	0.389276	1.34463	0.283455											0.0536481	0.0262162
		0.487094	0.254799	0.419931	0.553678	0.248414											0.238647	0.683943
		0.331506	1.29182	0.323328	0.0454507	0.066094											0.153597	0.354605
		0.759043	0.413091	0.0754967	0.611813	0.173837											1.28185	1.06665
		1.55374	0.120606	0.0707794	0.56203	0.568256											0.274041	0.699711
		1.99565	1.3841	0.350292	0.475343	0.534816											0.110432	0.452792
		0.220468	0.658759	0.183277	0.443747	0.405078											0.0825207	0.00398602
		0.441912	0.0389185	0.229047	0.393419	0.365732											1.09921	0.064369
		0.373242	0.238638	0.0172119	0.0446867	0.393933											0.225894	0.238855
		0.0138518	0.385497	0.802856	0.249893	0.337242											0.329266	1.29182
		1.06531	0.576733	0.0201465	0.856446	0.533443											0.968701	0.0371263
		0.335318	0.239481	0.299914	0.183618	0.223346											0.473538	0.272172
		1.20113	0.483028	0.548564		1.36334											0.164828	0.833147
		0.703992	0.624558	0.251116		0.256878											0.209423	0.268513
		0.216246	0.0827757	0.147315		0.796671											0.225041	0.263503
		0.237118	0.333426	0.251476		0.54166											0.368334	0.0466254
		0.275507	0.167794	0.241426		0.556324											0.5336	0.505649
		0.545781	0.466596	0.141902		0.0449435											0.969198	0.694878
		0.0286265	0.397875	0.619326		0.3299											1.06675	0.359245
		0.778141	1.206	0.577566		0.786283											0.0694632	0.216538
		0.359796	0.309124	0.200569		0.255493											0.512217	0.48986
		0.930579	0.0874241	0.379584		0.280504											0.790556	0.504644
		0.870434	0.308384	0.690541		0.573744											0.770467	0.275259
		0.585774	0.153581	0.77565		0.241648											0.272889	0.911267
		0.760514	0.513567	0.642894		0.229997											0.577984	0.164931
		0.275136	0.155871	0.151481		0.0391378											0.859894	0.378892
		0.780157	0.572301	0.363958		0.307276											0.252821	0.56763
		0.593734	0.249801	0.880712		0.208037											0.607035	0.431173
		0.270441	1.68796	0.492549		0.837738											0.580104	0.0267602
		0.384121	0.24043	0.330629		1.08193											0.477604	0.0436304
		1.4322	1.07498	0.551772		0.245735											0.840451	0.76672
		1.36014	0.376213	0.417023		0.255791											0.827698	0.0229785
		1.36941	0.845347	0.0383709		0.267988											0.277046	0.442481
		0.262559	0.378562	0.23405		0.06243											0.254467	0.584082
		0.542262	0.551132	0.350464		0.0239174											0.194334	0.731945
		0.80189	0.290067	0.0782758		0.341314											0.381063	0.214358
		0.566678	0.484421	0.276738		0.0877422											0.334188	0.217848
		0.833845	0.281204	0.517479		0.284585											0.374179	1.09988
		0.176239	0.238474	0.31178		0.382495											0.514894	0.0958683
		0.112217	0.175372	0.249798		0.287701											0.173038	0.249451
		0.518093	0.864306	0.931138		1.10626											0.534396	0.0757654
		0.539672	0.56765	0.435508		0.283689											0.616114	0.20902
		0.150708	0.278876	1.1917		0.316678											0.0513795	0.641881
		0.357669	0.363284	0.2686		0.772822											0.579191	0.808011
		0.254639	0.498124	0.338391		0.56552											0.863625	0.306638
		0.394681	0.825146	0.210763		0.126521											0.869255	0.26807
		1.11256	0.639439	0.332409		0.396157											0.922377	0.254086
		0.406398	0.0422235	0.374903		1.43671											0.464184	0.205248
		0.261312	0.338662	0.232091		0.211243											0.534424	0.202909
		1.14614	0.30188	0.349833		0.38296											0.521763	0.233155
		0.0873097	0.777432	0.462806		0.268215											0.651147	0.250211
		0.0289335	0.344646	0.562496		0.254967											0.62665	0.474164
		0.281388	0.381628	0.324395		0.0902921											0.523254	1.51423
		0.591035	0.234214	0.144962		0.524012											0.0468293	0.18
		0.0891658	0.0392636	0.186655		0.874528											0.464883	0.446452
		0.321864	0.865064	0.822423		0.533333											0.0797537	0.413401
		0.924873	0.80143	0.283742		0.228325											0.346781	0.551929
		0.816766	1.51857	0.232776		0.5707											0.28664	0.345159
		0.819979	0.561898	0.315006		0.0699703											0.684229	0.216195
		0.512725	0.316657	0.0439972		1.47593											0.262526	0.767293
		0.0176176	0.25468	0.680236		0.240913											0.835836	0.435311
		0.456582	0.557281	0.552685		0.215053											1.48119	0.368323
		0.196592	0.773229	0.211124		1.00485											0.333666	0.515185
		0.866386	0.237794	0.607236		0.10573											0.584582	1.60987
		0.425219	0.304443	0.285723		0											0.358295	0.170166
		0.405738	0.294894	0.187501		0.221514											0.747183	0.603195
		0.384808	0.398525	0.596276		0.140195											0.272168	0.257258
		0.274744	0.385155	0.358066		0.602726											0.243689	0.347525
		0.495618	0.250947	0.504932		0.738111											0.53072	0.286763
		0.855136	0.873423	0.297479		0.505208											0.533466	0.516105
		1.34545	0.251967	0.258364		0.246352											1.43274	0.356007
		0.800057	0.460144	0.0486572		0.273487											0.023789	0.186581
		0.332789	0.58257	0.213763		0.464898											1.01499	0.226442
		0.498568	0.547364	1.09888		0.263933											0.336514	0.139574
		0.379123	0.25466	0.0187988		0.642355											0.111794	0.12137
		0.717226	0.0245386	0.805341		0.933676											0.463382	0.310208
		0.44321	0.359864	0.205335		0.935167											1.77962	0.300917
		0.548231	1.39848	0.670229		0.626389											0.803841	0.405227
		0.202109	0.0981452	0.997017		0.293106											0.73985	0.53989
		0.16499	0.545351	0.0719429		0.229844											0.65749	0.272299
		0.0209351	0.410893	0.324252		0.533286											0.132301	0.324978
		0.303605	0.217019	0.342615													0.353422	0.271737
		0.0337819	0.196143	0.123569													0.309814	0.373853
		0.384207	0.222654	0.266724													1.74941	0.291829
		1.33999	0.25365	0.177287													0.596495	0.0750984
		0.260047	0.257691	0.398173													0.255046	0.182561
		0.751027	0.364915	0.19544													0.0970495	0.605793
		0.170013	0.52054	0.646055													1.23991	1.69428
		1.0313	0.294833	0.422735													0.575057	1.06665
		0.691242	0.346914	0.671816													0.843319	0.420264
		0.0684833	0.244953	0.270148													0.753977	0.285049
		0.376481	0.237345	0.225539													0.31082	0.163891
		0.0826755	0.291995	0.54362													0.840405	0.579918
		0.991315	0.330829	0.477434													1.02087	0.489107
		0.700722	0.552267	0.515158													0.229065	0.51587
		0.0719157	0.291936	1.29996													0.378892	1.28811
		0.370935	0.0892048	0.556782													1.10555	0.062527
		1.01742	0.507009	1.16486													0.56494	0.34925
		0.595477	0.209652	0.353934													0.578291	0.147461
		0.555894	0.225393	0.766846													0.142593	0.366403
		0.649952	0.49294	0.290247													0.447333	0.327659
		0.176514	0.183049	0.936879													0.392203	0.96601
		0.616567	0.090931	0.549269													0.435245	0.678125
		0.594986	0.751975	0.489292													0.583514	0.136254
		1.08631	0.249792	0.590235													1.06164	0.391582
		0.0579784	1.14232	0.133692													1.03101	0.398621
		1.3424	0.138518	0.988896													0.271238	0.152918
		0.427236	0.513955	0.406213													0.491476	0.400679
		1.47361	0.401878	0.295781													0.527186	0.206747
		0.349316	0.226932	0.330673													0.290539	0.310099
		1.04013	0.420743	0.0442427													0.388101	0.302113
		0.0496952	0.0194092	0.370898													1.08759	0.446507
		0.45885	0.860496	0.323343													0.667043	0.139574
		0.437466	0.389783	0.715283													0.291577	0.0403448
		0.221075	0.654989	0.110857													1.76369	0.571478
		0.563571	0.327235	0.469765													1.34515	0.239899
		0.288689	0.136245	0.613308													0.533399	0.393214
		0.354137	0.165195	0.378124													0.444982	0.436391
		0.557648	0.580286	0.0398632													0.578941	0.344291
		0.542143	0.390144	0.368047													0.155158	0.143704
		1.09327	0.342319	0.249492													1.79646	0.613446
		1.5615	0.839207	0.306608													0.240418	0.541885
		0.182502	0.109048	0.26812													0.277307	0.269673
		0.27767	0.587314	0.804453													1.54721	0.0706484
		0.0519994	0.261993	0.299486													0.343243	0.399781
		0.0449113	0.600801	0.503154													0.2505	0.335267
		0.809936	0.771894	0.50434													1.29528	0.18366
		0.383173	0.318529	0.597504													0.596303	0.552451
		0.566501	0.625318	0.526402													0.25972	0.475119
		0.768618	0.349909	0.160038													0.031189	1.08668
		0.306247	0.62451	0.775856													0.270684	0.274581
		0.487029	0.266899	0.535298													0.275367	1.32288
		0.82619	0.50708	0.0250006													0.950646	0.276791
		0.371298	0.241882	0.349578													0.168383	1.77621
		0.246651	0.769186	0.093716													0.620721	0.182554
		0.84411	0.445399	0.514595													0.951436	0.346075
		0.579965	0.338391	0.337971													1.4423	0.843551
		0.805052	0.93975	0.444853													0.566574	0.213319
		0.0285721	0.580506	0.575599													0.102542	1.63038
		0.0881023	0.155212	1.09204													0.843203	0.873226
		0.673703	0.112107	1.00146													0.294391	0.221608
		0.222534	0.338173	0.330954													0.142425	0.741935
		0.183495	0.127766	0.287923													0.807316	0.296206
		2.10001	1.04431	0.239933													1.67624	0.410357
		0.191725	0.12337	0.847844													0.796433	0.559934
		2.05533	0.883533	1.39176													0.498367	0.873692
		1.68972	0.248238	0.663416													0.215991	0.522924
		0.799301	0.556137	0.452515													0.559891	0.310175
		0.754443	0.837124	0.543796													0.409321	0.433531
		0.6191	0.252867	0.113478													1.06726	0.50349
		0.289592	0.608047	0.331678													0.87888	0.670171
		0.380456	0.797524	0.28479													0.528328	0.459335
		0.294779	0.214013	0.497779													0.575541	0.171995
		1.45842	0.215824	0.196847													0.885617	0.234448
		0.406257	0.366791	0.0837032													0.670766	0.162805
		0.388432	0.0854322	0.0354074													0.239215	0.0718046
		0.662433	0.705866	0.172965													0.348324	0.508159
		0.3134	0.299598	0.348617													0.270612	0.201672
		0.0526921	0.294021	0.396822													0.209935	0.430372
		0.570538	0.0771683	0.245626													0.43657	0.167521
		0.265868	0.464895	1.19185													0.913108	0.471146
		0.611874	0.537472	0.724327													0.328153	0.226481
		0.222395	0.63763	0.355599													0.547707	0.933856
		0.656114	0.0617376	0.225084													0.205392	0.397959
		0.233934	0.552682	0.0257603													0.370493	0.196931
		0.279757	0.093611	0.145988													0.314849	0.291287
		0.269064	0.147488	0.0572791													1.07866	0.424527
		0.37557	0.722662	0.453164													0.328419	1.26981
		0.305113	1.11763	0.0861222													0.514474	0.845386
		0.212099	0.664848	0.848269													0.588547	0.307529
		0.574897	0.389867	0.673934													0.191606	0.306756
		0.0544906	0.273767	0.0307998													0.972713	0.0986087
		0.85792	0.544832	0.40253													0.711869	0.00494385
		0.764636	0.78578	0.391189													0.872298	1.34521
		0.440392	0.13437	0.518271													0.810879	0.237711
		0.252429	0.0923694	0.0519769													1.75085	0.848972
		1.25085	0.540098	0.376174													0.539523	0.517056
		1.15813	0.764189	0.349849													0.0323774	0.651394
		0.436354	0.337015	0.28039													0.703741	0.174524
		0.214222	1.22761	0.445138													0.296336	0.321363
		1.51309	0.366954														0.277352	0.32977
		0.338024	0.859885														0.519327	0.19406
		0.140709	0.855497														0.504273	0.530029
		0.235749	0.34844														0.964797	0.304143
		0.0975984	0.0945634														0.336356	0.298588
		0.182102	0.767819														0.312214	0.274387
		0.313164	0.594308														0.407215	0.766588
		0.5678	0.150851														1.1059	0.321699
		0.807229	0.391054														0.183785	0.422508
		0.389102	0.236399														0.753114	1.22139
		0.505545	0.0161342														1.6504	0.47519
		0.415515	0.350389														0.45465	0.243655
		0.324056	0.548305														0.832153	0.282342
		0.578466	0.367421														0.588951	0.417442
		0.59458	0.393624														0.369779	1.24492
		0.706298	0.665915														0.271703	0.262831
		1.22447	0.975015														1.06665	0.536435
		0.755099	0.522606														0.56548	0.167023
		0.30518	0.224802														0.74865	0.252856
		0.648227	0.568921														0.133091	0.927097
		0.144186	0.225108														0.504507	0.211275
		0.681885	2.26136														0.248895	0.658491
		0.319696	0.25593														0.328568	0.274739
		0.530815	0.524822														1.1265	0.24185
		0.712409	0.751754														0.332425	0.315234
		0.194014	0.0863386														0.275656	0.415167
		0.652496	0.534057														0.712717	0.482253
		0.0937273	0.262143														2.15497	0.075055
		0.573144	0.251221														0.607562	0.0542182
		0.895122	0.428949														0.321454	0.608868
		0.550717	0.674648														0.165026	0.236825
		0.528505	0.294822														0.279466	0.8433
		0.314394	0.158756														0.530305	0.245655
		0.858019	0.40724														0.355022	0.167652
		0.0604651	0.713578														0.857908	0.045468
		0.748768	0.453975														0.627634	0.0558697
		0.0458979	0.790176														0.508873	0.252787
		0.551953	0.270977														1.14936	0.374226
		0.323543	0.718799														1.50033	0.00183105
		0.255508	0.384603														0.782891	1.18795
		0.229492	0.840824														0.278304	0.139057
		0.816222	0.291363														0.605003	0.237078
		0.243722	0.810839														0.190959	0.82156
		0.252371	0.539142														1.32251	0.567664
		0.841731	0.360683														0.739347	0.198428
		0.181296	0.892074														0.213539	1.68165
		0.534161	0.374183														0.316525	0.177885
		0.503983	0.528018														0.504078
		0.139558	0.534278														0.657704
		0.307994	0.362576														0.273284
		1.46387	0.566691														0.308318
		0.873113	0.470895														0.773891
		0.393251	0.477622														0.408802
		0.357532	0.247917														0.824011
		0.3993	0.0266685														1.35966
		0.0508081	0.318443														0.181025
		1.32719	0.0407256														0.162298
		0.215157	0.305799														0.800081
		0.999251	0.0333831														0.252
		0.249636	0.265608														0.291617
		0.575767	0.668478														0.28125
		0.190304	0.557114														0.546129
		1.09195	0.699392														0.378025
		0.320556	1.09942														0.365126
		0.781518	1.43449														0.640747
		0.517127	0.359489														0.476517
		0.537187	0.200058														0.385386
		0.950373	0.418668														0.346741
		0.842533	0.235867														0.268469
		0.514007	0.324694														0.282331
		0.709745	0.0389839														0.790436
		0.746352	0.349425														0.400392
		0.794537	0.19312														0.778091
		0.158286	0.435449														0.856908
		1.06105	0.499123														0.716057
		0.646789	0.400891														0.134218
		0.732574	0.369645														0.457202
		0.27804	0.149521														0.159342
		0.634434	0.614699														0.89534
		0.16063	0.656622														0.269075
		0.483889	0.515822														1.10468
		0.0539338	0.240296														0.842508
		0.358592	0.517637														0.509497
		0.837243	0.258139														0.553004
		0.334669	0.60639														0.340184
		0.778569	0.306984														1.0923
		0.484863	0.266527														0.188519
		0.0561783	0.587013														0.713166
		1.07028	0.223695														0.243406
		0.461658	0.727089														0.603028
		0.100498	0.0600339														0.175791
		0.343824	0.55306														0.515015
		0.363209	0.387095														0.362709
		0.130323	0.0412406														0.0223785
		0.473031	0.185331														0.617057
		0.970531	0.676719														0.416599
		0.381595	0.317005														0.572804
		0.526572	0.46839														1.08419
		0.254587	0.262234														0.795901
		0.801033	1.20931														0.450425
		1.59998	0.0290963														0.388729
		1.19504	0.353661														0.081656
		1.08653	0.359099														0.771868
		0.233976	0.580703														0.853341
		0.865314	0.216364														0.549787
		0.394732	1.13904														0.451957
		0.291335	0.211273														0.374955
		0.178103	0.279111														0.556535
		0.0427006	0.234163														0.217896
		1.15415	0.144029														0.175415
		0.517081	0.710911														1.42042
		0.323984	0.179448														0.270858
		0.205888	0.841583														1.11917
		0.0425122	0.369708														0.95273
		0.11187	0.295996														1.12235
		0.276991	0.439518														0.418598
		0.643796	0.516113														0.253422
		1.4215	0.254988														0.332407
		0.294366	0.301145														0.35001
		0.404532	0.407543														2.15147
		0.299988	0.290309														1.46577
		0.601806	0.207705														0.461696
		0.27171	0.239987														0.361504
		0.644391	0.498868														0.301527
		1.33253	0.352434														0.580911
		0.176645	0.319971														1.14271
		0.383168	0.431894														1.12447
		0.467214	1.10582														1.34532
		0.784889	0.174408														0.38077
		0.353703	0.261571														0.501895
		0.0925976	0.469197														1.1006
		0.274004	0.639596														0.422261
		0.167608	1.6364														0.53308
		0.848739	0.278451														0.268852
		0.115792	0.729671														0.691461
		0.495698	0.713338														1.08514
		0.869085	0.464339														0.885797
		1.06887	0.454215														0.513019
		0.724084	0.447														1.30927
		0.393518	0.227215														0.592191
		0.504419	0.194339														0.886519
		0.296661	0.23242														0.844245
		0.294615	0.256044														0.610402
		0.483522	0.546333														0.556956
		0.579765	0.217441														2.24073
		0.808112	0.263561														0.29131
		0.119927	0.342015														0.571921
		0.862128	0.913916														0.31301
		0.499345	0.345556														1.32497
		0.275391	0.796265														0.991489
		1.00836	0.510841														1.05665
		0.300887	0.588495														0.210475
		0.182955	0.233962														0.138896
		0.165811	0.245742														0.275968
		0.849408	0.564686														0.460364
		0.321803	0.229552														0.24289
		0.612405	0.372815														1.18808
		0.560662	0.388099														0.620866
		0.735967	0.251859														1.55739
		0.255416	0.418087														0.510464
		0.799719	0.306581														0.79103
		0.755638	0.270223														1.36606
		0.454637	0.831499														0.359524
		0.419571	0.302059														0.256733
		0.301803	0.268329														0.205593
		0.272861	0.491452														1.1928
		0.325647	0.488017														0.261292
		0.0758066	0.49028														0.817919
		0.270845	0.39334														0.0701294
		0.576996	0.0674752														1.33332
		0.941284	0.773921														0.081612
		0.861958	0.827345														0.200485
		0.769724	0.42032														0.753519
		0.87696	0.0255153														0.807853
		1.20067	0.414296														0.56158
		1.01927	0.555287														0.100565
		1.10903	0.448795														0.334581
		0.607224	0.255775														0.200222
		0.273769	0.360412														0.513779
		0.517577	0.278122														0.245018
		1.25986	0.196648														1.08383
		1.38306	0.536269														0.533923
		0.151735	0.384105														0.304807
		0.6177	0.261298														0.319192
		0.370404	0.507473														0.156435
		0.549402	0.165819														0.596494
		0.581217	0.388253														0.0547617
		0.126533	0.058347														1.60948
		0.0798856	0.0215885														0.482293
		0.467458	0.569384														0.246719
		0.506848	0.26983														0.534852
		0.800254	0.677164														0.273477
		0.292836	0.556081														0.40308
		0.374068	0.2948														0.253366
		0.653601	0.508764														0.308585
		0.194082	0.334215														0.310583
		1.98697	0.101047														0.269318
		0.0184497	0.311549														0.451377
		0.472657	0.591374														0.0367262
		0.286155	0.415573														0.268249
		0.507949	0.0205136														0.0487255
		1.16852	0.3946														0.5055
		0.463816	0.197066														0.144087
		0.933453	0.383859														0.763784
		0.680111	0.28085														0.600659
		0.627252	0.154233														0.351027
		0.600117	0.702331														0.178097
		0.56564	0.0292829														0.0363061
		0.606264	0.225902														0.580635
		1.11648	0.63739														0.571672
		0.768454	0.633877														0.290894
		0.85766	0.3331														0.426678
		0.211475	0.70646														0.366948
		0.799427	0.544427														0.724328
		1.60688	0.2596														0.955373
		0.640043	0.264767														0.206634
		0.244533	0.333465														0.186934
		0.105926	0.148944														0.265454
		0.688572	0.62324														0.206426
		0.196091	0.108816														0.267701
		0.586138	0.796974														0.01764
		0.173984	0.396304														0.150785
		0.565349	0.302369														0.502097
		0.377334	0.464701														1.5309
		0.768681	0.244124														0.504985
		0.286878	0.687024														1.01528
		0.542689	0.895249														1.35977
		0.162967	0.430276														0.901074
		0.516713	0.268465														0.636959
		0.571987	1.1314														0.533384
		0.447504	0.816257														0.0549316
		0.540302	0.0235709														0.548785
		0.530527	0.239353														0.182666
		0.367082	0.693472														0.288209
		0.484433	0.240122														0.286477
		0.386878	0.378716														0.380475
		0.387208	0.303771														0.45156
		0.178923	0.404189														0.4701
		0.0749799	0.422537														0.206794
		0.244279	0.238854														0.972105
		0.470947	0.433716														0.701838
		0.575074	0.2259														0.740734
		0.134841	0.538423														1.11832
		0.791615	0.261766														0.345242
		0.0794925	0.513559														0.406462
		0.301245	0.101027														1.26103
		0.768624	0.253311														0.243433
		0.285095	0.352403														1.18084
		0.237613	1.0234														0.827566
		0.040444	0.961688														0.192136
		0.23161	0.204092														0.404933
		1.30134	0.365423														0.2921
		1.08898	0.0505745														0.536285
		0.770598	0.268376														1.03795
		0.388322	0.0844726														0.206872
		0.342443	0.227075														1.24439
		1.12854	0.681519														0.584784
		0.227674	0.791686														0.800134
		0.173706	0.557251														0.172974
		0.2737	0.34441														0.359084
		0.799508	0.265195														0.576926
		0.570848	0.42816														0.940547
		1.84408	0.77758														0.800784
		0.797729	0.530263														0.109443
		0.475485	0.358646														2.0542
		0.872673	0.29792														0.0471302
		0.582234	0.848996														1.03116
		1.22786	0.312705														0.300496
		0.532176	1.08733														0.217797
		0.241058	1.14372														0.588035
		0.813281	0.262561														1.30745
		0.83824	0.257468														0.0533721
		0.198933	0.322099														0.43335
		0.0656119	0.603628														0.571159
		0.136999	0.351167														0.0832274
		0.295521	0.255432														0.621726
		0.247586	0.533818														0.849138
		0.723459	0.672338														0.319331
		0.508954	0.0189819														0.376084
		1.15313	0.365654														0.549283
		0.0223049	0.242269														0.517599
		0.674238	0.403466														0.0386353
		0.270944	0.475762														0.474623
		0.559767	0.186294														0.470306
		0.253997	0.266265														0.559813
		0.0495739	0.424808														0.823962
		0.293585	0.218407														0.150272
		1.13223															0.633963
		0.668803															1.10836
		0.257984															0.755381
		0.349247															0.267085
		0.341553															0.286409
		0.205319															0.913572
		0.311															0.385438
		1.83763															0.658704
		0.0553526															1.29052
		0.719319															0.964047
		0.599991															0.832951
		0.280553															0.080176
		0.0607838															0.237483
		0.271593															0.548632
		0.579738															0.714008
		1.07976															0.0158462
		0.571308															0.39667
		0.786342															0.551156
		0.0425291															0.292282
		0.342423															0.241394
		0.540358															0.954288
		0.303547															0.0316729
		0.166611															0.729522
		0.256516															0.343237
		1.20106															0.540201
		0.19952															0.0512559
		0.379721															0.586229
		0.310912															1.45657
		0.268875															0.00681329
		0.593857															0.742474
		0.169249															0.572959
		0.276643															0.478241
		0.535471															1.07019
		1.31903															0.802454
		0.613038															0.544062
		0.513794															0.474731
		0.267282															0.357211
		0.412964															0.730683
		0.221615															0.533568
		0.0499298															0.071477
		0.29248															0.349608
		0.391371															0.266818
		0.940739															0.64975
		0.789637															0.435091
		0.465026															0.618097
		0.56421															0.247294
		0.0487915															0.366481
		0.462524															1.33365
		0.514706															0.253797
		0.898575															0.661959
		0.0122559															0.387558
		0.0768289															0.190918
		0.316663															0.805103
		0.216024															0.510625
		0.527004															0.443839
		0.569307															1.30309
		0.342749															0.295784
		0.038047															0.134511
		0.387216															0.568825
		0.368696															0.603237
		0.654468															0.24731
		0.187705															0.242543
		0.335813															0.544225
		0.244995															0.12234
		0.497565															0.309202
		0.62706															0.689026
		0.543479															0.0851289
		0.576176															1.23578
		0.713085															0.489271
		0.107459															0.846942
		0.408959															0.0756879
		0.552033															0.995411
		0.236694															0.305333
		0.219238															0.306576
		0.594593															1.10362
		0.0835194															0.494329
		0.56146															0.306182
		0.887817															2.84401
		1.41653															0.385011
		0.260993															0.494349
		0.429626															0.589797
		0.104861															0.498767
		0.586885															0.33326
		1.54999															0.333095
		0.724655															0.364005
		0.505057															0.25231
		0.530551															0.253435
		0.591895															0.347483
		0.228261															0.030912
		1.09391															0.266663
		0.27927															1.14422
		0.552978															0.400219
		0.658711															0.596248
		0.854785															0.0206064
		0.699695															0.225857
		0.35333															0.668108
		0.498791															0.0531028
		0.26609															0.843339
		0.576322															0.27992
		0.318312															0.29368
		1.92206															0.0269749
		0.583454															0.536004
		1.18979															1.06978
		0.289025															1.77573
		0.297428															0.504035
		0.632443															0.143648
		1.27046															0.230697
		0.764361															0.0170396
		0.576458															0.287588
		0.283827															0.166388
		0.268481															0.576585
		0.386448															0.736657
		0.691361															0.186878
		0.100018															0.315581
		0.587058															0.0602494
		0.373917															0.404096
		0.229249															0.530396
		0.52565															1.73808
		1.20031															0.537881
		0.0430765															0.534233
		0.5664															0.852563
		0.271593															1.05147
		1.14576															0.403069
		0.758779															0.159686
		0.265878															0.846412
		0.837511															0.18135
		0.398556															0.784954
		0.367408															0.432285
		0.273923															2.81862
		0.570138															0.259426
		0.408394															0.588676
		0.209152															0.325793
		0.378243															0.111272
		0.559464															0.599503
		0.294969															0.560874
		0.338463															1.05988
		0.613529															1.73164
		0.546218															0.792924
		0.196623															0.688802
		0.0188583															0.0402829
		0.263161															0.778513
		0.900398															0.589922
		1.13047															1.35058
		0.441349															1.61066
		0.351696															0.540301
		0.635898															1.50847
		0.350108															0.386271
		0.377232															0.284539
		0.286729															0.298644
		0.805359															0.218018
		1.00781															0.534211
		0.609157															0.33211
		0.177805															0.97017
		0.635251															0.816591
		0.750168															0.538609
		0.722907															0.263272
		1.32027															0.694921
		0.699826															0.580173
		0.552982															0.32097
		0.173525															0.00589613
		0.565318															0.237013
		1.35949															0.254915
		0.1759															0.444837
		0.339621															0.275339
		0.54862															0.0358887
		0.188354															0.647028
		0.519729															0.285767
		0.380932															0.558516
		0.490601															0.27591
		0.598081															0.582396
		0.857238															0.465958
		0.770332															0.37765
		0.184814															0.604041
		0.834756															1.08764
		0.365143															0.0830952
		0.536047															0.56452
		1.43634															0.282968
		0.489282															1.42958
		0.632039															0.311361
		0.736043															0.973708
		0.69965															0.437097
		0.700902															0.173397
		0.800101															0.23336
		0.517569															0.545776
		0.501377															0.161653
		0.0593402															0.235194
		0.741104															0.507782
		0.79722															0.179282
		0.844311															0.0615239
		0.594611															0.371416
		0.146138															0.423504
		0.434374															0.21253
		0.40202															0.635916
		0.559737															0.541136
		0.0887194															0.965783
		0.214822															1.10401
		0.208356															0.583657
		0.282141															0.851926
		0.51277															0.541416
		0.886162															0.531999
		0.956608															0.536316
		1.15766															0.347132
		0.534343															0.563055
		0.595948															1.59019
		0.26993															0.248287
		0.10462															0.254126
		0.232075															0.299523
		0.347149															0.373629
		0.204876															0.800464
		0.674144															0.229625
		0.08163															0.235053
		0.25832															0.552585
		0.458243															0.401434
		0.253072															0.261621
		0.365337															0.220918
		0.394616															0.738572
		0.325242															0.501832
		0.0644531															0.232439
		0.551515															0.245977
		0.830552															0.133626
		0.529521															0.557912
		1.14604															1.75895
		1.6449															0.794558
		1.05586															0.101411
		1.19595															0.458344
		0.586313															0.570323
		0.184813															0.514283
		0.516897															0.242176
		0.0399827															0.527776
		0.725033															0.618327
		0.311832															0.0661553
		0.454614															0.946004
		0.374389															0.318914
		0.152185															0.721613
		0.678929															0.250152
		0.173908															0.573666
		0.573775															1.3283
		0.182628															0.754235
		0.247813															0.297634
		0.880363															0.130498
		1.90237															0.428905
		0.403157															0.0814334
		0.360595															0.558955
		0.357897															0.543208
		0.305111															0.624798
		0.26442															0.355318
		0.303739															0.398901
		0.468037															0.24663
		0.960907															0.408983
		0.630005															0.329903
		0.809028															0.158866
		0.574003															0.328839
		0.858638															0.116518
		0.239607															0.307578
		0.00170898															0.396883
		1.69179															0.685044
		0.326653															0.37956
		0.323951															0.0408388
		0.55192															0.300263
		0.216889															0.209393
		1.023															0.148643
		0.0144043															2.06581
		0.857692															2.04622
		0.0294776															0.73636
		0.0766451															1.13724
		0.182069															0.78163
		0.348305															1.18784
		0.646276															0.0571291
		0.410826															0.280433
		0.512884															0.32052
		0.794243															0.59357
		0.0285185															1.31881
		0.614399															0.887169
		0.22103															0.401061
		0.333183															0.474326
		0.291838															0.603931
		0.389391															0.538231
		0.573895															0.528006
		0.998291															0.971151
		0.461443															0.347087
		0.256209															0.288362
		0.334472															0.260528
		0.307789															0.707987
		0.513108															0.326763
		0.359046															0.0602048
		0.30622															0.825616
		0.368437															0.523755
		1.00264															0.47934
		0.756723															0.356684
		0.200286															0.22831
		1.03149															0.418806
		1.14192															0.359309
		0.295637															0.423732
		0.860941															0.501958
		0.0098877															0.227356
		0.570619															0.369313
		0.12209															1.39329
		1.10253															0.670457
		1.19032															0.604081
		0.154896															0.29477
		0.498343															0.0494039
		0.546076															0.0702505
		0.598241															0.282039
		0.505151															1.59511
		0.615604															0.287978
		0.595392															0.46339
		0.0387341															0.332191
		0.376983															0.301117
		0.241919															0.368121
		0.272806															0.452281
		1.2451															0.295776
		0.513751															0.284096
		0.355806															0.273473
		0.560635															0.418176
		0.597541															0.146059
		0.842797															0.800732
		0.398968															0.128828
		0.387128															0.227949
		0.316781															0.290056
		0.650578															0.273542
		0.304064															0.117574
		1.09851															0.485025
		0.360564															1.04131
		0.579307															0.240386
		0.949848															0.201966
		1.10285															0.202393
		0.592299															0.576106
		0.0815273															0.458774
		0.311248															0.495752
		0.629887															0.909263
		0.259268															0.172137
		1.19246															0.233906
		1.48093															0.779403
		0.500351															0.863139
		0.612005
		0.244309
		0.287449
		0.714857
		0.0578394
		1.95403
		0.426208
		1.23794
		0.267201
		0.736788
		0.146963
		0.255788
		0.505071
		0.526471
		1.03578
		0.864166
		0.352527
		0.247836
		0.473609
		0.697272
		0.517975
		0.232897
		0.519499
		0.252402
		0.44125
		1.06777
		0.94491
		0.227631
		0.105808
		0.266703
		0.675806
		0.3316
		0.327659
		0.581962
		0.804846
		0.76696
		0.206751
		0.553216
		1.13134
		0.801822
		0.251664
		0.776903
		0.836255
		0.375995
		0.0251669
		0.814772
		0.495102
		0.556364
		0.798539
		0.895081
		1.30943
		0.271799
		0.321902
		0.239942
		0.118358
		0.935629
		0.151929
		0.528076
		0.458896
		0.323975
		0.00984162
		0.879914
		0.247197
		0.441956
		0.673991
		0.499216
		0.215149
		0.521638
		0.251061
		0.204493
		0.323614
		1.06253
		0.584173
		0.258906
		0.527906
		0.592458
		1.13599
		0.553496
		0.293607
		0.594164
		0.87775
		0.578066
		0.0750108
		0.29653
		0.173337
		0.539958
		0.388752
		0.779166
		0.253656
		0.307525
		0.80807
		0.274319
		0.0857126
		0.49971
		0.0536805
		0.417342
		1.64991
		1.13382
		1.00665
		0.0266841
		0.823434
		0.459136
		0.73513
		0.82875
		0.952162
		1.16957
		0.18073
		0.941794
		0.277773
		0.267271
		0.73777
		0.631163
		0.817201
		1.36749
		0.376036
		0.244467
		0.0626935
		0.544205
		1.31732
		0.339242
		0.0283203
		1.27547
		0.265811
		0.24297
		0.561707
		0.398056
		0.182434
		1.2937
		0.267316
		0.347349
		0.388166
		0.597589
		0.979401
		0.275535
		0.291562
		0.64654
		1.01747
		1.4979
		1.07045
		0.0399796
		0.70784
		0.225025
		0.202896
		0.239342
		0.490408
		0.377162
		1.32479
		0.489982
		0.298539
		0.363861
		0.537255
		0.614274
		0.128411
		0.438328
		0.582154
		0.79736
		0.376557
		1.8784
		0.27441
		0.260014
		0.897771
		1.4233
		0.511927
		0.0107422
		0.371374
		0.382258
		1.46527
		0.220159
		0.818957
		0.280766
		0.104858
		0.226657
		0.270692
		0.560717
		0.287598
		0.2023
		0.312558
		0.232311
		0.618746
		0.588088
		0.119284
		0.468571
		0.247823
		0.161377
		0.524541
		0.267038
		0.0055542
		0.212447
		0.765622
		0.486639
		0.298704
		0.0825075
		0.781291
		1.56113
		0.909074
		0.401943
		0.68744
		0.854823
		0.537906
		0.732891
		0.791575
		0.948714
		0.307995
		1.61928
		0.443093
		0.446655
		1.11904
		0.828303
		0.3754
		0.0882726
		0.155607
		0.218138
		0.213492
		0.197991
		0.274708
		0.473269
		0.529541
		0.294922
		0.318101
		0.00751526
		0.533553
		0.350239
		0.824309
		0.528327
		0.278493
		1.01704
		0.529094
		0.452093
		0.478731
		0.0512229
		1.10064
		0.533774
		0.370645
		0.849609
		0.538092
		0.282964
		0.72598
		0.194254
		0.741181
		0.441813
		0.82824
		0.57366
		0.25919
		1.13097
		0.266843
		2.0257
		0.28138
		1.13209
		0.254757
		0.877834
		0.857873
		0.356816
		0.860382
		0.956496
		0.441546
		1.09275
		1.08596
		0.20157
		1.03557
		1.05339
		0.336755
		0.226479
		0.457086
		1.34743
		0.530136
		1.27386
		0.522686
		0.943958
		1.64304
		0.122735
		1.61637
		0.789788
		1.17187
		1.14804
		0.239635
		0.859087
		0.607118
		0.435702
		0.287186
		1.67501
		0.68523
		0.19704
		0.301449
		0.735917
		0.277814
		0.396879
		0.243149
		0.534123
		0.337715
		1.32552
		0.233933
		0.974296
		0.548436
		1.33754
		0.382268
		1.20018
		0.516113
		0.211765
		0.429276
		0.618114
		0.484175
		0.757258
		0.828439
		0.300036
		1.01015
		0.863263
		0.634234
		0.573579
		0.211658
		0.997978
		0.196112
		0.277931
		0.507033
		0.262525
		0.610669
		0.624933
		0.443218
		0.375457
		0.789916
		0.279539
		0.524218
		0.930711
		0.370029
		0.235894
		0.947434
		0.543363
		0.313315
		0.420427
		0.792254
		0.283898
		0.0387765
		0.0762693
		0.39811
		0.250753
		0.995793
		0.721316
		0.250587
		0.113376
		0.0665983
		0.247084
		0.574942
		0.114199
		0.300675
		0.19556
		0.218102
		0.339092
		0.622936
		0.41857
		0.539973
		1.3678
		0.979286
		0.233702
		0.420146
		0.489319
		1.11332
		0.401926
		0.09021
		0.274151
		0.185545
		0.562989
		0.713861
		0.260435
[truncated: 1,225 more rows]
