# Supplementary material for: Compartmentalized oskar degradation in the germ plasm safeguards germline development
Source: eLife journal article supplement (doi:10.7554/elife.49988), 2020-01-07
Supplement: supp [file elife-49988-supp-v1.zip › elife_poa_e49988_Figure_2_source_data_4.xlsx]

## Sheet: Sheet1
Figure 2G,H,I
	Time = 0						Time = 2.5 min
	Germ Granules		Founder Granules				Germ Granules		Founder Granules
	Track Position X Start	Track Position Y Start	Track Position X Start	Track Position Y Start			Track Position X End	Track Position Y End	Track Position X End	Track Position Y End
	3668.2	643.267	3599.13	624.49			3670.07	645.134	3637.8	642.198
	3669.82	644.133	3654.87	624.867			3663.67	649.394	3624.73	641.119
	3667.69	644.259	3632.73	625.4			3661.58	649.9	3619.4	645.689
	3667.13	644.589	3630.07	626.733			3664.36	649.667	3639.9	647.796
	3667.67	645.446	3644.54	626.73			3666.07	649.841	3627.66	651.267
	3666.07	645.933	3644.43	627.726			3661.54	657.076	3665.8	649.667
	3666.88	646.467	3625.8	628.132			3659.65	656.828	3629.27	653.667
	3667.67	646.733	3625	629.133			3668.19	654.195	3624.71	654.754
	3668.99	646.747	3627.43	633.655			3662.04	654.496	3598.6	658.201
	3666.88	648.342	3643.68	634.462			3637	657.133	3661.54	655.572
	3630.55	651.23	3627.4	634.69			3653.27	663.515	3661.26	657.134
	3624.2	652.625	3661.03	635.511			3650.88	663.802	3610.63	658.787
	3629.52	652.867	3624.99	642.2			3650.06	662.467	3659.15	658.2
	3633.53	658.734	3659.12	645.742			3629.27	664.334	3632.2	660.867
	3646.87	659.263	3667.93	645.947			3624.74	668.066	3610.87	661.4
	3655.12	660.6	3669.56	647.533			3629.26	667.593	3660.2	662.734
	3638.6	670.2	3621.78	648.576			3625	667.533	3637	663
	3668.15	645.123	3629.83	653.139			3636.47	669.929	3612.46	662.826
	3642.33	650.011	3644.18	653.133			3665.77	649.936	3652.49	665.196
	3655.67	660.059	3655.93	654.555			3664.79	655.555	3639.13	665.441
	3630.62	652.314	3609	660.067			3659.14	656.866	3650.6	665.73
	3623.7	652.6	3647.39	661.099			3665.26	658.437	3623.67	669.141
	3665.55	645.667	3647.24	661.859			3652.48	663.534	3619.14	635.511
	3652.2	651.323	3629.3	662.974			3628.47	665.146	3649.8	640.6
	3628.45	665.667	3656.47	653.151			3650.6	666.201	3628.95	646.172
	3670.07	647	3602.34	627.8			3651.94	665.667	3659.4	652.874
	3654.87	665.933	3634.6	636.332			3664.47	646.734	3608.73	638.189
	3670.32	634.686	3606.6	640.06			3663.37	646.505	3621	638.457
	3669.8	645.133	3618.07	640.6			3664.26	649.118	3668.46	642.477
	3643.42	647.819	3659.4	642.74			3623.14	666.763	3645.27	647.265
	3624.73	653.662	3667.93	645.422			3642.86	668.514	3651.14	657.134
	3655.4	659.514	3626.63	666.467			3639.66	671.975	3650.84	664.6
	3668.21	648.063	3625.23	627.795			3662.34	647.8	3598.85	645.672
	3667.93	644.382	3621.58	635			3668.73	650.2	3637.8	647.533
	3645.53	650.2	3629.8	635			3663.93	648.6	3652.95	648.061
	3625.53	664.319	3634.06	639			3664.53	656.687	3610.34	659.267
	3667.71	644.057	3627.93	642.2			3665.8	654.727	3652.47	665.159
	3642.59	651	3606.88	648.035			3656.74	663.267	3640.2	666.48
	3628.94	651.533	3632.47	652.6			3652.21	663.533	3629.76	668.094
	3630.52	653.389	3623.67	653.667			3654.61	662.47	3631.13	637.666
	3655.93	659.772	3601.27	657.669			3650.6	666.53	3621.27	644.358
	3668.2	643.756	3647.41	660.634			3640.73	668.085	3633.44	658.754
	3669	645.841	3621	660.867			3667.93	649.4	3657	657.383
	3646.06	650.199	3654.07	636.337			3662.01	649.935	3617	663.301
	3666.33	644.065	3667.67	646.418			3660.45	655.232	3629.54	637.667
	3643.13	647.8	3661	658.467			3661.98	654.96	3636.2	644.067
	3668.26	645.14	3609.04	659.239			3652.46	663.621	3658.32	653.934
	3633.81	650.999	3631.13	636.323			3661	657.361	3661.54	657.666
	3623.13	651.797	3629.53	654.178			3659.13	655.785	3639.66	657.666
	3624.69	652.654	3638.6	663.017			3663.4	657.633	3606.87	658.691
	3667.9	646.732	3634.33	625.667			3623.36	667.267	3610.06	655.809
	3642.37	649.133	3643.93	628.067			3663.14	648.375	3609.27	660.6
	3630.38	651.286	3627.88	633.432			3665	655.524	3599.4	636.899
	3631.13	652.867	3661.27	634.699			3651.67	663.267	3613	640.333
	3662.07	662.463	3638.6	654.681			3629	665.934	3631.14	649.667
	3625.53	663.807	3609.27	639.267			3621.33	666.457	3617	649.137
	3668.46	643.8	3628.24	642.991			3629.79	667.256	3655.13	653.667
	3668.39	644.863	3667.4	649.4			3639.4	672.334	3606.87	655.247
	3670.03	633.4	3641.81	650.2			3659.4	641.4	3635.13	656.584
	3665.8	646.744	3633.8	660.337			3670.89	644.645	3631.4	659.8
	3625.8	664.604	3629.41	662.224			3670.87	644.315	3609.53	634.467
	3657.85	640.867	3642.33	630.733			3664.47	647.533	3652.74	637.934
	3667.93	643.83	3626.6	631.8			3665.02	649.42	3627.4	640.322
	3669.53	645.133	3659.38	640.81			3661	655.8	3630.87	641.666
	3632.2	652.6	3632.47	642.762			3664.45	656.333	3609.79	653.4
	3668.2	645.932	3632.2	645.133			3662.32	656.066	3612.21	654.2
	3666.88	646.204	3615.13	646.975			3652.73	663.8	3662.06	655
	3643.4	647.8	3644.2	651			3651.38	665.67	3630.6	654.42
	3624.19	652.637	3656.73	653.133			3654.6	665.933	3624.47	636.326
	3641.81	648.598	3629.26	654.436			3661.53	642.997	3636.47	640.334
	3666.6	644.867	3655.93	654.393			3664.77	650.175	3624.21	642.2
	3667.14	645.12	3632.2	627.8			3664.92	648.858	3637.53	656.867
	3665.8	645.727	3645.27	628.317			3659.92	657.389	3619.67	663.001
	3633.8	650.467	3630.6	630.183			3650.95	663.804	3637	663.718
	3669.55	644.6	3659.4	646.2			3630.31	667.259	3652.74	663.267
	3666.07	645.154	3643.93	647.534			3624.73	666.733	3628.23	668.066
	3666.87	647.846	3606.92	660.357			3625.51	667.266	3640.5	668.33
	3630.33	651.457	3609.8	660.867			3667.95	649.666	3636.73	671.787
	3632.24	652.389	3638.64	660.867			3665.53	649.749	3627.67	636.611
	3621.49	652.582	3662	634.003			3661.27	656.622	3614.07	639.263
	3662.06	655.269	3640.2	641.916			3660.48	654.753	3639.14	654.734
	3665.8	644.848	3629.27	662.159			3653.32	664.11	3629.27	654.466
	3629	663.178	3631.15	625.136			3653.54	663.249	3664.2	657.1
	3627.93	667.284	3617.53	636.339			3653.86	662.722	3652.2	665.4
	3667.41	632.347	3642.87	636.6			3652.73	664.778	3642.61	647.533
	3667.19	644.886	3659.15	645.611			3654.1	665.443	3619.93	653.671
	3646.33	647.505	3667.62	646.4			3628.54	664.6	3622.33	669.4
	3647.12	650.211	3609	654.455			3628.46	666.2	3621.01	637.134
	3659.13	662.428	3628.82	662.937			3651.93	663.768	3601.54	653.152
	3670.33	634.196	3603.4	629.942			3645.8	671	3662.34	655.554
	3667.1	644.607	3665	631			3659.65	654.995	3662.07	644.867
	3669	647.268	3660.97	632.333			3625.27	667	3623.13	645.638
	3624.69	652.864	3656.47	644.062			3629.78	667.315	3658.33	644.867
	3650.6	655.248	3621.53	644.867			3625.1	667.397	3617.82	648.091
	3667.67	644.617	3656.46	645.932			3671.64	645.439	3634.6	660.638
	3667.67	644.591	3629.26	630.203			3662.62	646.452	3646.12	661.642
	3667.4	647.511	3625.52	635.543			3663.67	645.684	3629	667
	3654.33	635.267	3658.91	644.074			3667.13	655.817	3641.01	670.466
	3670.07	645.933	3655.14	654.707			3663.69	657.35	3639.13	672.6
	3640.2	659.54	3639.67	657.933			3641.53	657.666	3625.57	637.12
	3657.53	640.867	3654.87	659.812			3627.93	666.251	3662.33	644.066
	3667.15	644.099	3613.03	660.333			3665.92	649.919	3663.67	648.93
	3666.33	644.318	3626.87	664.08			3667.05	654.467	3641.54	656.815
	3667.93	645.623	3638.33	654.414			3659.93	657.419	3667.93	656.095
	3640.95	648.314	3614.33	636.6			3658.32	657.133	3659.15	646.2
	3624.2	651.042	3629.27	653.946			3649.27	665.366	3667.14	651.801
	3630.87	652.563	3648.14	660.867			3667.65	649.667	3661.8	655
	3632.99	652.858	3595.67	624.333			3662.01	654.477	3611.67	658.24
			3668.47	644.067			3659.44	655.267	3605	639.511
			3656.48	645.354			3650.63	664.606	3631.17	643.267
			3640.73	660.067			3652.73	663.534	3645.54	647.267
			3661.25	634.508			3653.26	664.866	3607.67	656.6
			3629	642.983			3654.35	664.888	3643.13	658.2
			3611.12	630.204			3650.32	667	3652.22	659.207
			3611.74	635.267			3650.6	666.466	3645.8	634.749
			3661.52	635.784			3672.46	646.774	3601.27	645.151
			3655.64	636.067			3662.63	649.124	3614.6	653.945
			3664.2	644.067			3661	655.233	3643.1	658.748
			3608.2	660.333			3665.53	658.76	3652.46	665.452
			3624.21	662.733			3665.27	657.093	3618.33	637.4
			3630.34	665.638			3630.03	666.249	3661	646.467
			3658.81	644.289			3628.46	667.534	3650.6	644.04
			3665.29	626.427			3642.87	671.809	3662.07	653.66
			3667.93	629.667			3645.54	669.933	3621.26	668.867
			3626.87	632.067			3643.92	672.071	3653.01	665.933
			3627.91	633.408			3662.07	650.998	3647.13	671.8
			3621.23	647.533			3665	650.181	3639.94	671.006
			3610.07	652.6			3667.4	648.882	3658.86	646.733
			3630.07	655.801			3662.08	654.743	3651.93	658.467
			3642.33	660.854			3665.1	655.268	3664.2	658.172
			3628.74	662.146			3649.01	666.483	3609.8	660.6
			3655.13	642.218			3652.25	664.067	3651.4	661.896
			3628.24	662.733			3651.59	664.237	3618.33	639.277
			3636.47	664.83			3628.3	665.662	3661.52	644.333
			3632.73	628.344			3626.61	666.742	3653	648.333
			3646.04	632.602			3626.06	669.683	3630.07	654.944
			3666.06	643.747			3664.46	649.346	3660.99	655.855
			3664.4	644.224			3659.95	655.791	3625	657.398
			3666.34	651.267			3667.13	659.544	3626.06	667.794
			3620.73	626.467			3650.88	663.8	3622.6	646.467
			3621	642.708			3621.8	665.94	3661	656.612
			3631.44	644.067			3636.74	669.171	3642.07	658.2
			3659.4	644.095			3660.77	656.855	3612.2	662.924
			3642.56	652.593			3661.54	656.87	3629.27	646.2
			3659.67	654.477			3643.67	656.6	3647.88	660.86
			3639.13	630.713			3652.71	664.6	3648.2	664.6
			3623.95	641.91			3653.54	665.133	3606.86	639.805
			3627.64	644.33			3623.16	667.259	3655.13	651.253
			3623.13	648.333			3651.67	666.112	3660.73	655.8
			3609.53	662.2			3641.53	668.379	3642.32	658.779
			3615.67	633.945			3638.6	669.4	3625.27	658.467
			3661.51	636.059			3662.87	643.787	3651.13	664.583
			3628.76	654.242			3671.66	645.666	3644.44	672.044
			3628.99	661.133			3671.94	646.21	3621.27	641.394
			3663.4	642.733			3662.59	647.826	3665.8	650.734
			3666.6	644.067			3662.87	649.134	3622.07	650.201
			3667.67	645.949			3663.39	656.552	3612.47	658.154
			3654.48	655.267			3621.53	667	3647.39	666.2
			3647.4	660.055			3650.35	664.035	3629.34	666.443
			3638.33	628.867			3662.87	646.447	3622.33	668.313
			3620.2	638.717			3662.87	650.723	3644.96	635
			3669	644.594			3665.23	656.605	3636.47	640.867
			3628.74	655.219			3653.76	663.166	3661.54	647.756
			3630.07	657.133			3651.41	663.292	3613.27	653.676
							3627.16	667.515	3654.33	661.879
							3664.45	649.142	3650.33	635.331
							3664.46	648.371	3651.93	647.809
							3661.53	653.994	3638.91	647.533
							3664.73	657.4	3666.82	650.429
							3665	654.466	3649.8	650.735
							3662.33	657.164	3618.33	652.598
							3666.86	656.254	3635.66	651.8
							3662.85	658.19	3661.23	658.733
							3650.6	664.058	3642.07	659.267
							3627.66	664.067	3611.69	663.027
							3624.2	667.561	3648.47	665.428
							3662.86	649.122	3651.93	665.4
							3669.27	648.283	3654.87	667
							3668.2	654.486	3653.8	667.267
							3650.63	663.773	3664.47	657.934
							3647.67	664.333	3637.27	665.4
							3652.73	666.991	3626.6	668.309
							3654.22	663.266
							3627.67	667.833
							3629.54	666.737
							3625.29	667.014
							3653.28	662.994
							3638.07	669.409
							3650.6	665.999
							3666.85	649.376
							3665.03	648.932
							3661.27	657.689
							3665.8	655.534
							3629.24	666.195
							3627.93	667.573
							3660.74	657.133
							3660.76	655
							3628.2	665.934
							3629.26	665.934
							3625.85	667
							3641.82	671.529
							3663.66	647.006
							3665.02	649.393
							3660.87	655.205
							3665.23	656.609
							3653	663.561
							3651.43	662.761
							3652.47	664.597
							3650.62	666.206
							3651.68	663.803
							3624	667.796
							3641.79	669.428
							3642.33	669.4
							3662.35	646.467
							3668.91	649.403
							3663.94	656.882
							3652.64	664.867
							3620.73	666.755
							3624.22	667.031
							3624.2	667.007
							3673.29	645.548
							3667.32	648.6
							3660.46	654.467
							3664.71	655.824
							3653.52	666.189
							3651.14	663.237
							3624.73	666.707
							3626.86	667
							3622.87	667.26
							3625.77	667.484
							3630.6	667.266
							3620.74	668.886
							3663.09	648.33
							3661.26	655.786
							3660.74	655.8
							3661.28	654.734
							3660.75	656.334
							3620.73	664.863
							3619.93	666.559
							3664.22	655.533
							3659.42	656.067
							3666.6	656.333
							3665.55	656.873
							3660.2	656.871
							3653.53	663.067
							3652.47	663.801
							3606.57	664.326
							3653.8	664.296
