# Supplementary material for: Compartmentalized oskar degradation in the germ plasm safeguards germline development
Source: eLife journal article supplement (doi:10.7554/elife.49988), 2020-01-07
Supplement: supp [file elife-49988-supp-v1.zip › elife_poa_e49988_Figure_3_figure_supplement_1_source_data_1.xlsx]

## Sheet: Sheet1
Figure 3 - supplement 1
	osk-sfgfp					osk-∆i-sfgfp
	early		late			early		late
	nc2-1	1.50787e+07	nc10-1	3.80929e+06		nc2-1	5.65647e+06	nc11-1	7.05906e+06
	nc2-2	1.87138e+07	nc11-1	3.32941e+06		nc2-2	6.92896e+06	nc11-2	5.22951e+06
	nc2-3	1.55882e+07	nc11-2	2.17033e+06		nc2-3	5.89256e+06	nc11-3	5.93648e+06
	nc2-4	1.81002e+07	nc12-1	1.19592e+06		nc2-4	6.114e+06	nc11-4	7.78218e+06
	nc2-5	1.3334e+07	nc12-2	2.23746e+06		nc2-5	6.41165e+06	nc11-5	5.06611e+06
	nc3-1	1.73008e+07	nc12-3	13768.1		nc2-6	3.07592e+06	nc11/12-1	5.15906e+06
	nc3-2	1.54204e+07	nc13-1	39371.9		nc3-1	7.73475e+06	nc11/12-2	6.59241e+06
	nc3-3	3.79354e+06	nc13-2	260970		nc3-2	7.07609e+06	nc12-1	5.01029e+06
	nc5-1	1.1518e+07				nc4-1	5.33529e+06	nc12-2	5.98429e+06
						nc5-1	6.25156e+06	nc13-1	3.75984e+06
								nc13-2	5.76565e+06
								nc13-3	5.83511e+06
	Q1	1.3334e+07	Q1	205571		Q1	5.7155e+06	Q1	5.08935e+06
	Q3	1.73008e+07	Q3	2.51044e+06		Q3	6.79963e+06	Q3	6.44038e+06
	IQR	3.96688e+06	IQR	2.30487e+06		IQR	1.08414e+06	IQR	1.35103e+06
	High above	2.32512e+07	High above	5.96775e+06		High above	8.42584e+06	High above	8.46693e+06
	Low below	7.38363e+06	Low below	-3.25174e+06		Low below	4.08929e+06	Low below	3.0628e+06
	High out?	FALSE	High out?	FALSE		High out?	FALSE	High out?	FALSE
	Low out?	TRUE	Low out?	FALSE		Low out?	TRUE	Low out?	FALSE
	Minus outliers
	osk-sfgfp					osk-∆i-sfgfp
	early		late			early		late
	nc1-1	1.50787e+07	nc10-1	3.80929e+06		nc1-1	5.65647e+06	nc11-1	7.05906e+06
	nc1-2	1.87138e+07	nc11-1	3.32941e+06		nc1-2	6.92896e+06	nc11-2	5.22951e+06
	nc2-1	1.55882e+07	nc11-2	2.17033e+06		nc1-3	5.89256e+06	nc11-3	5.93648e+06
	nc2-2	1.81002e+07	nc12-1	1.19592e+06		nc1-4	6.114e+06	nc11-4	7.78218e+06
	nc2-3	1.3334e+07	nc12-2	2.23746e+06		nc1-5	6.41165e+06	nc11-5	5.06611e+06
	nc3-1	1.73008e+07	nc12-3	13768.1		nc3-1	7.73475e+06	nc11/12-1	5.15906e+06
	nc3-2	1.54204e+07	nc13-1	39371.9		nc3-2	7.07609e+06	nc11/12-2	6.59241e+06
	nc5-1	1.1518e+07	nc13-2	260970		nc4-1	5.33529e+06	nc12-1	5.01029e+06
						nc5-1	6.25156e+06	nc12-2	5.98429e+06
								nc13-1	3.75984e+06
								nc13-2	5.76565e+06
								nc13-3	5.83511e+06
	Avg	1.56318e+07	Avg	1.63206e+06		Avg	6.37793e+06	Avg	5.75792e+06
	Stdev	2.41818e+06	Stdev	1.4882e+06		Stdev	755147	Stdev	1.16609e+06
		early	late
osk-sfgfp	avg	1.56318e+07	1.63206e+06
	stdev	2.41818e+06	1.4882e+06
osk-∆i-sfgfp	avg	6.37793e+06	5.75792e+06
	stdev	755147	1.16609e+06
	Normalized to "early"
		early	late
osk-sfgfp	avg	1	0.104407
	stdev	0.154697	0.0952036
osk-∆i-sfgfp	avg	1	0.902789
	stdev	0.1184	0.182832
	TTEST early vs late
	osk-sfgfp	1.3298e-09
	osk-∆i-sfgfp	0.155803
