# Supplementary material for: Compartmentalized oskar degradation in the germ plasm safeguards germline development
Source: eLife journal article supplement (doi:10.7554/elife.49988), 2020-01-07
Supplement: supp [file elife-49988-supp-v1.zip › elife_poa_e49988_Figure_3_source_data_1.xlsx]

## Sheet: Sheet1
Figure 3C
	nanos								oskar
	nc2-5		nc6-10		nc11-12				nc2-5		nc6-10		nc11-12
	Sample	Intenisty	Sample	Intenisty	Sample	Intenisty			Sample	Intenisty	Sample	Intenisty	Sample	Intenisty
	1	306967	1	388523	1	217357			1	692588	1	394386	1	114722
	2	250589	2	292965	2	379989			2	665497	2	490058	2	181278
	3	359393	3	215721	3	233260			3	693695	3	557988	3	4792.97
	4	293204	4	351086	4	298436			4	722057	4	626753	4	9146.66
	5	385848	5	332881	5	385452			5	721636	5	492896	5	25808.9
									6	726312	6	523685	6	128060
									7	661280	7	544646	7	68074.8
											8	593189	8	87524
											9	444141	9	143974
											10	440934
	Remove outliers based on interquartile range
	Max	385848	Max	388523	Max	385452			Max	726312	Max	626753	Max	181278
	Min	250589	Min	215721	Min	217357			Min	661280	Min	394386	Min	4792.97
	Q1	293204	Q1	292965	Q1	233260			Q1	679042	Q1	455620	Q1	25808.9
	Q3	359393	Q3	351086	Q3	379989			Q3	721846	Q3	554652	Q3	128060
	IQR	66188.6	IQR	58120.7	IQR	146728			IQR	42804.1	IQR	99032.1	IQR	102251
	High outlier?	FALSE	High outlier?	FALSE	High outlier?	FALSE			High outlier?	FALSE	High outlier?	FALSE	High outlier?	FALSE
	Low outlier?	FALSE	Low outlier?	FALSE	Low outlier?	FALSE			Low outlier?	FALSE	Low outlier?	FALSE	Low outlier?	FALSE
	Avg	319200		316235		302899			Avg	697581		510867		84820.1
	StDev	53829.1		65882.1		78969.5			StDev	27050.6		72571		62717.5
	Normalize to Average Intensity at nc2-5
	nanos
		nc2-5	nc6-10	nc11-12
	Avg	1	0.990711	0.94893
	StDev	0.168638	0.206397	0.247398
	ttest vs nc2-5		0.939797	0.712831
	oskar
		nc2-5	nc6-10	nc11-12
	Avg	1	0.732342	0.121592
	StDev	0.0387777	0.104032	0.0899071
	ttest vs nc2-5		1.09809e-05	8.83753e-13
