# Supplementary material for: Compartmentalized oskar degradation in the germ plasm safeguards germline development
Source: eLife journal article supplement (doi:10.7554/elife.49988), 2020-01-07
Supplement: supp [file elife-49988-supp-v1.zip › elife_poa_e49988_Figure_3_source_data_2.xlsx]

## Sheet: Sheet1
Figure 3D,E
	# of oskar particles with x # of transcripts					# of nanos particles with x # of transcripts
		nc2-5	nc6-10	nc11-12			nc1-5	nc6-10	nc11-12
	x <= 2	6933	12585	3650		x <= 2	2677	4008	168
	2 < x <=4	10179	12639	2228		2 < x <=4	2670	4217	131
	4 < x <=8	13548	11526	709		4 < x <=8	3888	4806	140
	8 < x <= 16	9314	7153	219		8 < x <= 16	4166	4326	175
	16 < x <= 32	3751	3049	43		16 < x <= 32	2783	2663	173
	32 < x	1484	1048	3		32 < x	583	574	53
	Total	45209	48000	6852		Total	16767	20599	840
	oskar particle sizes (# of transcripts)
	nc2_1	nc2_2	nc2_3	nc2_4	nc3_1	nc3_2	nc3_3	nc3_4	nc3_5	nc3_6	nc3_7	nc3_8	nc3_9	nc3_10	nc4_1	nc4_2	nc4_3	nc4_4	nc4_5	nc4_6	nc4_7	nc5_1	nc5_2	nc5_3	nc5_4	nc5_5	nc5_6	nc5_7	nc6_1	nc6_2	nc6_3	nc6_4	nc6_5	nc6_6	nc7_1	nc7_2	nc7_3	nc7_4	nc7_5	nc7_6	nc8_1	nc8_2	nc8_3	nc8_4	nc8_5	nc8_6	nc9_1	nc9_2	nc9_3
	3.87647	1.77269	3.0297	26.3621	1.8211	2.71895	4.22625	7.25022	7.83618	4.73779	1.81239	2.06003	55.8156	4.54311	1.79146	2.32043	4.13353	5.59902	2.50551	5.6292	3.36731	3.40193	1.45515	2.57721	5.21775	1.88186	5.67146	17.7785	2.01438	3.13046	5.93258	1.86417	1.43168	4.46556	3.1244	1.3773	11.1872	4.24154	12.2063	2.23126	1.34693	2.07846	1.13096	5.59392	21.2959	3.8966	1.15597	11.0102	5.85103
	3.24045	1.27146	6.2144	27.1493	3.97524	1.95281	5.08489	5.42925	1.72461	3.70451	2.39085	1.0725	10.9578	17.3554	1.55534	3.26999	3.76633	7.97637	2.4171	11.1712	2.22777	1.22401	5.94209	7.64743	72.2021	3.21736	3.8009	8.95332	1.47077	3.35801	6.45102	7.79807	1.02317	7.9665	1.56337	6.19281	3.63079	4.7637	8.03611	6.46732	5.0433	1.32068	3.57245	3.16022	1.42096	2.24766	5.73921	2.40692	3.04573
	1.23008	6.98689	29.5098	39.1813	7.49566	1.53182	28.5847	8.52827	11.0516	1.81073	5.89355	2.71686	5.82691	44.6709	3.11212	5.07262	6.34264	3.72555	3.91424	4.67672	2.13048	7.34374	2.80303	1.34651	5.04148	3.07561	3.86242	2.52702	2.20156	3.67026	1.93432	1.30126	2.16393	15.755	2.07761	1.59504	2.30386	4.01781	5.11263	24.4088	1.58719	21.7937	2.00328	1.20646	1.53011	5.72027	1.34598	4.43726	4.50165
	4.00613	1.50091	2.86861	1.09521	1.87045	3.11451	2.71498	1.07808	6.02738	2.52757	8.37878	5.91225	10.9606	15.7387	4.72562	6.55598	1.27961	11.4429	3.73338	22.2663	10.3897	9.53225	11.0506	6.4448	4.98627	6.07633	18.3396	11.0651	1.92225	4.83261	1.26206	2.56047	1.54257	8.98833	2.17189	5.70726	10.7879	8.04728	6.16901	1.90193	1.36382	1.97977	1.18105	8.56275	2.02712	9.81253	3.78563	3.12811	2.15479
	14.9505	8.83373	12.4925	1.36945	1.15041	2.92962	8.33955	1.74171	12.077	1.57643	3.61633	1.43368	6.36744	13.2307	3.69924	4.93918	7.11477	2.07213	7.16971	6.77822	2.29706	1.35702	11.8664	1.68815	10.6072	6.86145	1.60521	18.3401	13.4629	4.62034	7.76414	1.07429	2.02915	10.1596	1.65375	17.6985	6.34264	6.59126	22.0799	2.88571	4.11985	1.64311	2.74739	4.4507	4.8203	86.0255	5.38172	3.04289	2.28307
	5.87694	1.03046	7.90336	2.74175	7.53256	1.78552	2.65448	3.68132	7.32757	13.7232	1.78187	3.14357	5.71557	6.45211	4.55486	10.4303	4.22548	3.49232	3.46538	4.96623	7.36616	1.08281	5.43693	7.71826	5.27955	1.12188	3.4536	1.97051	2.99848	33.2442	4.14685	3.00764	1.11367	15.4353	3.11739	2.15654	2.22507	2.65699	3.85011	3.23769	1.53653	4.05237	10.2883	9.61941	2.26073	3.76298	2.0826	4.87786	14.5774
	7.07355	2.19873	5.01315	6.46148	15.5425	2.73978	8.82911	1.33504	1.04354	14.4173	4.57182	5.21732	64.2675	62.6743	7.3164	3.94109	4.10406	3.08556	2.48707	6.09961	14.0955	1.12191	3.93467	4.31257	6.8817	4.68153	2.42344	41.6955	2.0155	7.94682	4.02182	1.21174	10.661	20.6696	2.3359	2.67866	3.27839	5.46379	3.20997	20.5884	1.04679	7.17049	5.24275	6.53134	7.06895	11.7963	6.73345	1.94437	20.2063
	2.19755	6.05961	12.7814	12.5542	1.62921	2.14536	7.84311	3.13011	3.02948	1.3973	4.01073	1.311	24.4636	5.18658	1.80487	8.65969	3.92665	5.93473	1.17912	2.61091	54.9779	1.06779	12.1921	2.52153	2.22417	3.40484	23.1157	8.24303	4.27893	5.94423	2.79708	1.1082	21.6725	15.6413	1.64479	7.00074	11.5256	1.59941	3.91861	4.44602	4.70632	2.34946	6.66827	8.60943	8.99659	1.92132	1.47767	9.95703	5.35053
	7.92928	1.34561	8.99445	1.12718	1.08398	6.41335	2.27683	1.54744	16.4955	9.50679	2.30962	9.41243	2.01512	10.7433	3.91206	5.97807	10.083	5.86589	4.58185	5.25443	6.16324	22.2078	5.82889	8.63093	23.3956	1.9658	4.17154	16.7768	16.2112	2.11439	8.84356	1.87412	4.74466	7.06124	2.09475	2.43335	9.0047	5.43367	6.23091	7.06611	2.75578	1.21446	10.1418	1.25908	5.5771	2.38128	6.31189	3.20365	7.00974
	8.4842	2.35578	6.49728	7.1414	6.01359	2.81653	1.30498	2.52502	2.47935	38.2791	1.53349	7.33259	10.7254	8.12903	2.91291	6.72306	4.63983	1.67197	9.27611	8.34785	7.23171	2.15504	3.60745	1.92155	2.96471	4.46087	8.23857	6.88908	1.68351	3.83427	1.70783	1.4039	4.99989	8.38768	4.88451	1.01948	5.1385	2.21235	14.1998	15.1697	9.65188	1.37045	1.72259	3.47636	6.44788	6.33661	1.48385	3.29966	2.99246
	10.1528	16.5828	1.63138	7.51796	1.45162	4.51294	3.29113	6.63218	1.36507	1.28364	1.41141	2.65781	4.51477	4.15685	2.49758	10.0013	2.99184	3.84752	1.08111	8.48886	10.382	3.02631	1.2096	5.38603	19.3484	2.90221	6.10478	2.64565	5.48765	7.80645	2.18111	1.90306	13.5463	31.9804	22.0789	6.14723	12.549	1.73558	6.77162	1.93647	3.13115	10.5454	5.3801	1.15426	27.1915	12.8384	23.5834	2.83859	53.8677
	90.4257	50.6585	12.8971	6.40819	4.19803	4.37405	6.03052	1.10502	3.66904	15.721	3.54918	10.0037	3.5044	3.41856	4.60085	1.04386	4.54612	1.78734	4.64147	6.36643	5.9828	4.02632	11.3275	6.5468	8.67734	1.52097	4.63031	56.7434	9.80334	17.7913	2.72769	1.47579	20.9026	9.40307	8.82507	10.8322	1.23556	8.68351	10.3669	7.79694	1.49047	2.9709	1.81489	4.5169	5.14856	7.41584	27.6192	8.31111	3.4551
	3.71146	4.97669	85.8099	4.66502	6.98042	10.9496	6.33833	9.09866	2.29988	4.13431	1.44193	3.61257	19.22	7.71516	3.59881	9.55632	5.42257	1.05712	2.1299	10.5545	8.7342	1.77669	9.76068	1.27747	10.8362	5.06554	4.53737	29.1673	6.80464	7.00611	6.84443	1.93426	1.62892	5.29718	3.07765	1.25296	3.51429	4.50423	6.59446	24.0783	4.02748	5.90501	4.91291	12.2275	1.03511	7.45291	1.78257	1.13536	4.69302
	56.099	2.90284	2.71195	13.827	1.44009	2.26702	7.12052	2.21211	17.2877	6.79433	1.42643	1.66227	1.5551	4.91905	5.1261	13.2928	5.77032	5.4692	36.0132	2.67128	9.14077	15.4276	5.41032	10.2518	15.1943	7.0625	4.34529	2.42597	3.00318	7.09722	3.99498	3.53348	3.17468	31.344	17.4363	3.46464	6.594	7.56046	1.277	2.34833	1.27017	4.9398	5.97835	6.38536	1.48701	5.84876	2.49709	10.3961	5.77883
	7.50071	2.02978	1.20291	4.20108	1.43594	1.25919	5.71882	4.73401	2.18821	3.53114	3.62525	8.88475	2.75941	5.95744	5.32449	1.65981	2.13072	1.0194	4.5326	3.8073	3.89477	7.09856	1.618	12.3858	8.24781	4.88962	6.02263	15.6286	7.66074	1.38694	4.17631	1.98987	7.74822	7.61398	1.45702	3.51134	1.29212	1.92235	3.27648	14.1648	2.22074	1.32445	9.70296	1.41736	2.64537	3.42233	7.68129	1.36645	5.91411
	4.18058	1.52365	7.70795	2.33287	1.93365	6.83101	4.08565	1.97743	5.89117	1.12875	5.24748	4.41647	3.25234	5.14948	5.76313	4.57192	8.65136	1.35638	6.16336	4.93318	2.01992	7.67053	20.4629	6.29157	53.8881	5.7064	4.18716	3.43649	1.35218	3.74217	1.39821	2.41307	2.87101	9.99942	8.56601	2.33658	13.3398	1.12947	17.23	16.8717	1.65628	1.57871	1.4419	1.29812	9.11057	3.16206	15.8964	9.43866	1.7293
	2.56671	6.06101	64.9252	2.2778	8.47263	4.7376	10.8795	5.422	4.18292	10.2373	4.22954	9.39833	8.87899	6.60381	3.14924	5.0263	4.4577	2.90921	3.03344	2.90858	8.11446	10.0607	3.05332	6.24748	2.52505	5.30278	2.0931	3.49213	17.1406	8.59005	10.6568	3.47606	5.39278	12.5429	1.72349	10.1768	3.34075	1.89182	1.69916	3.81729	8.27885	5.68378	32.2727	8.24151	35.6831	15.5401	4.56423	2.59857	2.0861
	2.61905	4.00605	67.2801	10.0689	5.6967	10.2182	1.74287	7.14299	2.76464	7.01439	1.74384	13.9855	18.4995	2.59329	1.04432	1.39402	3.39029	26.0786	3.34868	12.3623	1.23211	3.64592	1.30331	1.04184	17.8014	5.24799	52.8131	23.9229	9.94815	3.78748	2.32053	14.4748	18.1205	14.8976	1.94671	14.5281	1.55702	3.81015	1.31257	10.194	3.11119	1.50636	2.39802	1.50945	7.10882	4.96885	7.07105	2.39464	1.02693
	41.7289	31.6363	12.5141	1.18686	3.37189	3.55272	2.43456	8.58889	6.62544	5.33096	3.18107	3.71239	17.9911	18.0698	4.15438	2.75937	10.9913	2.66906	1.57519	24.3486	2.15318	12.7426	1.66104	4.69964	20.2753	2.56142	19.8802	9.4842	9.86745	6.72488	7.21624	3.88027	14.8955	2.06438	5.41472	1.11962	1.44294	2.76744	14.6082	3.79426	3.82073	1.24791	1.68384	13.4073	5.7797	1.56268	8.18504	1.70174	1.8681
	4.38095	1.48447	12.8429	15.5787	9.28631	3.64084	3.01552	2.18051	7.50763	24.7968	4.00557	1.86915	11.5782	8.93987	5.46018	4.26919	6.98863	2.43173	2.22614	2.4862	4.79903	14.1271	1.81609	2.44091	6.40354	11.6199	17.8714	1.69518	4.49413	2.29465	7.91076	2.28014	2.61418	11.815	4.94879	2.29101	4.47721	2.48226	1.90333	11.9743	3.64955	4.77252	1.02385	1.88968	12.5715	6.0613	5.10952	3.58285	2.67562
	18.959	11.6075	6.99715	6.35064	5.54679	19.2248	1.02378	3.64143	3.93621	6.16873	2.03401	1.56588	12.8196	4.69439	1.33715	8.14741	1.55133	3.81326	1.81996	4.21094	6.73344	4.33023	2.06706	5.9339	9.97254	2.85496	2.21382	5.25762	1.66131	1.31946	1.74384	4.12668	13.9392	11.2386	4.04653	1.95737	1.89733	6.66958	7.77201	4.48863	6.93934	2.14705	3.77439	5.51457	3.19232	3.1382	1.0371	3.95758	1.85828
	1.13201	1.17177	7.61938	5.65366	4.88348	10.3756	4.51056	9.20071	5.95723	3.64935	6.46497	3.98023	23.6605	2.06895	1.76713	4.52064	4.60329	2.83189	2.9329	2.4179	17.6152	2.28617	4.49135	4.33528	23.9897	12.8508	1.50841	12.4132	3.8362	5.52953	34.7236	10.7076	5.59576	2.35541	1.24002	2.52337	4.64447	1.9344	27.6752	35.3716	2.17238	1.31608	4.67979	5.61854	14.0835	3.44435	10.0719	2.13118	11.3011
	7.62848	3.57092	2.90072	5.61316	2.58542	3.94946	13.2365	1.69923	14.6388	12.9031	5.96727	6.21399	15.5076	2.89751	5.77839	4.55373	31.1692	1.08416	5.05977	9.47528	7.44311	5.01557	18.4068	3.51705	7.4556	3.09924	5.8913	5.28983	1.37841	1.4948	2.20663	6.66998	9.6088	11.8822	1.45624	5.63918	2.40876	1.28732	105.873	38.8699	5.48008	4.21756	15.6359	5.84684	2.64698	9.6969	1.60713	1.72705	2.54173
	1.89297	8.70781	90.9537	2.66573	4.87702	3.84304	11.0918	3.18088	4.38169	11.7497	3.52712	2.92755	12.0368	43.0694	1.62649	3.7365	10.1567	1.35229	4.90543	7.62319	3.71021	1.14701	3.98517	11.4879	1.63659	2.79715	4.00956	8.89986	8.10818	6.77117	4.6103	1.05304	7.70393	3.22922	1.12666	6.78075	5.14865	3.35909	4.01081	3.75626	3.27162	6.69457	12.9742	2.65735	48.0246	3.80923	4.56114	9.81376	5.93584
	6.12636	11.0594	5.7029	11.0018	2.1975	32.7401	3.8904	1.12678	5.00898	5.13697	5.66067	6.17018	15.8171	7.90972	1.08226	7.4322	30.8226	5.96523	4.40832	4.50398	4.69643	28.4364	1.25722	6.34235	15.2982	2.75242	2.91229	9.06608	10.793	3.1344	6.07398	2.22046	9.83472	33.846	1.64596	2.22068	1.01078	6.66355	3.39042	4.28864	2.46741	2.95919	4.7072	1.87865	4.27617	3.58788	3.25891	1.62173	2.32303
	2.18105	1.43375	4.46623	17.3585	4.16251	2.24682	3.24544	8.94945	15.8787	23.9205	3.99101	3.43808	25.0273	7.22544	2.14246	5.4884	7.71538	6.56876	3.49493	30.7091	10.4537	10.1932	3.30496	5.37757	79.7362	3.02686	1.3335	4.63373	6.08797	6.34514	3.48178	7.14834	10.3908	2.00432	1.12938	1.85891	7.0716	1.61347	10.438	6.36637	2.57283	2.38793	4.6653	5.20988	10.1916	8.39522	17.428	21.6664	3.90442
	3.09618	1.52645	17.2161	3.15099	15.0102	2.78758	16.0971	1.80595	64.4111	6.42879	4.65211	6.53326	9.73601	4.25702	3.53302	4.20467	10.1443	3.29082	3.25724	2.62104	5.0691	4.81513	2.34278	11.8584	5.36617	4.58603	10.2229	7.23471	7.49485	1.22638	3.65656	3.27621	6.81172	7.11415	1.67713	5.4057	9.05932	1.89182	46.2053	27.4941	1.97152	5.35758	17.4751	1.73436	8.9688	6.77124	12.3304	20.105	5.46409
	2.62612	19.6871	5.59994	8.04159	3.66803	2.19514	8.76031	1.27701	7.70464	3.67572	2.40447	2.93326	1.89749	10.9635	1.55781	5.3533	1.14699	4.10056	25.6492	37.7244	17.4215	2.01179	1.82406	4.90899	2.70537	5.38169	14.1146	8.44879	2.81713	3.63283	3.07266	1.27142	6.46376	10.4785	1.01329	8.32459	1.22009	1.1857	33.347	3.8361	3.92846	9.96825	11.7258	1.23022	1.75404	1.69409	3.13297	11.066	9.17785
	3.71051	1.16197	2.08254	18.0139	7.08098	2.32664	10.6949	10.4534	11.3696	2.8137	6.85562	8.71178	16.163	13.3032	3.05026	3.77345	52.6084	9.66909	1.25086	5.15572	4.94203	7.844	6.59908	6.71873	7.02049	1.7366	2.92482	5.29423	22.9185	3.91061	1.70849	5.00248	6.70497	4.2682	1.06276	2.40297	8.51695	9.2611	7.75357	10.9241	4.92918	7.91196	2.4207	5.95251	8.64094	6.51611	2.31857	1.05908	29.0897
	4.16973	44.2767	15.7929	5.04797	3.41248	3.3021	2.50181	2.12715	11.6297	6.52366	3.21206	10.3241	15.6805	5.15196	3.06407	10.1243	6.07976	2.98528	15.7951	3.79738	15.031	1.75876	2.61696	2.69836	11.6365	4.82528	11.1416	5.40406	8.12297	3.87515	1.14881	3.04155	18.4904	8.88893	7.98788	1.37787	2.6756	2.1047	14.705	3.25995	9.29723	1.51933	1.40693	4.82159	22.2061	31.3787	5.08477	1.31696	11.5955
	1.25507	13.9028	5.39124	64.981	5.10212	4.24103	6.19527	13.1343	12.0548	4.79992	1.63162	2.22805	22.2468	18.9594	1.64979	7.97536	2.25214	6.14566	1.62142	1.54848	60.8484	2.13643	13.5779	4.78293	5.36769	10.4985	1.29686	1.49014	3.22578	4.73706	2.57321	3.77944	1.99569	7.03406	1.10523	4.02333	2.45662	4.9585	13.4102	2.3065	5.39948	3.13066	1.04811	3.15343	10.0526	3.11728	1.37736	4.00856	19.8312
	4.95379	4.3156	7.73064	1.4746	5.6538	4.76105	2.82351	5.44324	1.67434	3.95306	3.41584	7.84693	13.823	10.4107	2.82506	1.81476	4.00386	3.72901	4.65587	1.76528	10.3269	3.53494	11.679	8.59039	2.39892	4.35884	3.64027	24.6698	22.7751	1.20865	3.04386	2.85074	20.4922	7.07053	3.34607	5.51428	11.3782	4.5215	18.5426	1.56261	1.09796	1.31232	5.73294	10.2818	2.63006	11.5613	10.3693	8.5515	14.3195
	3.49552	1.33652	9.87464	12.4661	1.44655	1.05771	2.48675	5.09407	2.72431	10.7677	6.44149	6.05093	13.7964	20.0052	1.92922	17.3354	3.27064	3.00855	1.94474	19.3066	1.70179	2.32612	3.66777	4.11658	12.1582	5.20628	4.6413	2.43988	15.8162	7.98179	5.03906	1.07926	6.4252	7.28791	3.96628	2.91158	5.43578	4.49981	19.1307	1.65435	8.69516	1.92624	11.2728	2.29706	6.27268	9.56145	8.13025	4.91842	1.56317
	1.03913	1.5212	19.9707	5.06218	1.55264	21.7117	3.92571	4.63869	1.96197	5.57132	4.71127	4.94872	4.96008	7.10342	4.84378	29.2276	6.40394	7.81732	2.48278	19.7239	21.8971	4.52556	1.81101	1.59728	1.37523	1.25457	6.48352	4.1563	1.66064	1.81937	16.1318	1.16155	6.57209	15.0814	1.31287	6.88596	4.41534	1.82193	5.10407	20.8644	5.41611	6.41898	1.16751	1.38808	19.9776	7.2947	14.4395	7.00085	18.5562
	8.11032	58.6241	3.26718	16.6221	1.64536	21.9509	6.51113	6.33171	7.88003	3.4887	12.0101	5.47792	29.3677	10.9041	5.71796	5.6792	2.17139	3.75573	4.39519	6.4376	10.9649	23.1861	38.5184	2.36073	4.66665	5.16757	4.50227	8.719	1.21477	6.23039	1.66594	1.21852	1.73025	25.0336	2.68808	1.17138	6.52101	4.09614	11.6274	7.05575	1.29294	3.39747	7.94887	1.16148	29.2843	5.47396	15.3104	3.68593	21.5416
	1.11787	6.40485	8.99057	9.85367	2.81883	12.1127	8.71669	4.43976	4.58338	2.14202	2.16923	5.18455	10.9032	26.5686	5.6728	3.8126	1.82069	4.08327	1.61738	11.2373	1.1015	18.2846	1.81237	3.46181	27.2857	8.05419	1.44014	18.4082	2.25783	7.58334	2.31661	4.1624	13.5935	8.63079	4.97255	7.23141	7.74448	2.36136	2.10419	46.5648	5.11367	8.53884	14.746	20.009	3.77714	1.71722	3.08834	1.07545	6.20712
	5.35879	12.1542	30.2677	20.0842	2.99688	2.20227	5.61756	2.45456	9.75956	5.1297	1.72412	8.73693	1.67343	3.67331	4.06962	2.43513	5.87995	3.72775	3.27997	6.82119	46.308	2.74836	3.17804	4.10055	24.9516	5.5918	2.06977	5.98035	1.5898	1.90458	2.00109	2.44744	24.9861	12.2397	4.31417	5.0158	7.62944	1.69621	7.99923	7.29949	3.54464	1.82169	6.35449	1.59263	4.55569	1.89159	7.45461	1.90827	2.09591
	1.42197	15.2935	9.57625	1.82665	2.12046	2.16719	1.07961	3.52901	1.49194	19.8459	5.4367	5.01577	12.8056	19.7842	6.12031	9.67598	4.79779	5.17246	5.75567	4.53505	2.58659	3.08692	35.5071	5.81765	10.5809	1.05905	4.43708	5.80461	21.4323	2.72659	4.47611	2.04141	14.8088	3.15986	1.00706	7.15152	2.86702	2.32522	5.47683	12.6487	12.6177	2.29091	7.35692	1.21664	1.54421	8.30418	1.24656	4.76175	1.55125
	1.64498	6.30586	5.94039	7.20392	4.88902	32.6514	2.50026	6.66741	13.6145	15.3409	1.16021	2.17471	15.3396	51.7702	3.40434	2.86469	1.47706	11.8622	2.30469	13.6726	25.4926	1.53817	3.15364	2.54068	3.00321	7.77071	2.14613	22.3434	2.5266	1.04414	7.87214	4.4251	6.30283	10.6988	12.0956	1.28335	2.18543	6.89893	52.2716	6.10766	5.47906	3.05496	22.0421	1.08891	7.77097	16.6164	2.35569	5.79441	5.44166
	1.24611	1.00422	6.90804	7.58474	1.18501	11.1374	6.13178	8.72773	8.626	8.79208	1.00667	1.21994	5.78979	43.3753	4.16551	1.27767	29.3391	2.5955	5.6415	2.3626	7.19221	2.09682	2.48614	2.99145	1.92278	9.55707	2.80468	8.11489	3.8687	4.57749	12.146	4.97897	6.73493	11.6941	2.55562	3.42019	3.90342	12.5563	2.28531	75.5735	2.31337	1.60171	1.10702	1.04393	2.94583	12.3891	2.62701	3.23379	3.2413
	1.22254	1.19345	14.7455	10.2956	1.75837	35.05	12.108	1.44072	8.68036	7.87156	1.52785	1.30376	27.4835	1.59036	5.0663	2.48089	1.86607	4.32814	2.70001	3.79254	32.0901	3.74119	11.0535	3.59054	3.28839	2.95096	2.52429	21.2325	5.77279	4.6952	3.72398	1.50744	7.19919	8.7545	7.46701	1.42794	4.27757	1.98782	11.337	15.263	4.81327	6.82338	4.68546	4.36413	7.30537	1.33876	22.0218	31.2632	13.9683
	1.21594	1.15708	14.5761	8.28066	7.98784	2.31347	5.41361	1.8619	10.4441	6.84859	1.23628	3.8084	13.3797	52.2814	2.71494	4.17655	7.77667	2.38898	2.61589	3.0996	5.03401	20.0671	6.54536	2.23201	32.1859	5.62346	21.0417	5.7636	1.74627	11.8505	1.94087	2.13094	49.6946	8.16815	2.51783	14.9883	3.66221	3.9664	8.63477	4.10517	5.88948	9.70479	1.29289	3.92873	7.36015	22.5474	4.68531	1.50526	9.32015
	2.42904	3.52964	13.345	5.41991	19.5445	1.64816	6.33755	5.77428	2.04557	20.8574	1.14519	7.97227	13.7459	18.623	1.32581	5.22151	2.87927	2.7643	12.325	2.93038	19.0145	8.54795	6.01851	9.38458	2.76362	6.4141	4.42822	30.2276	1.7586	2.75959	2.64194	1.81715	8.82588	30.1248	1.56921	4.57357	8.7746	3.47879	13.5011	4.21879	1.42292	1.15089	1.24469	2.64716	5.13164	3.40324	3.66632	16.9032	5.81177
	1.29844	14.0958	8.90201	29.7788	1.1661	2.06383	6.09115	10.3508	4.14434	6.42182	9.16712	1.93773	28.4687	6.79755	1.62154	6.88077	2.98241	2.88124	9.90154	6.54556	12.2498	12.3344	11.4751	6.7214	7.6653	4.63378	4.43921	15.8102	2.81646	12.0791	8.21908	2.00208	12.5521	13.6434	4.37066	6.8989	2.0728	3.61455	1.70904	6.39478	1.29703	9.83108	4.20189	2.33229	8.85079	11.6942	15.8783	2.0895	1.12156
	1.09052	5.46638	2.62283	6.49416	5.56385	1.487	4.16471	4.92673	8.11621	6.45547	7.13499	8.4607	27.153	3.03025	1.10412	1.49879	21.9508	1.49846	6.40939	1.97239	2.32861	14.0906	2.79997	5.65952	8.04013	14.6749	3.27483	4.16435	1.16299	5.71422	4.44993	4.33105	6.26141	3.08192	1.56727	2.43785	3.39875	3.48481	6.08207	9.00335	2.36659	4.17993	3.25805	12.7491	3.99141	4.30994	2.44937	1.33631	18.5786
	3.69778	7.443	5.83133	11.9929	7.99429	5.94177	1.30264	9.28671	18.3283	13.0549	2.27629	2.44445	1.49559	2.73139	1.07339	7.66766	7.6305	1.76125	8.97957	7.99268	6.17798	6.45813	10.5297	2.46362	1.66293	11.3253	28.0497	17.5647	1.69225	21.3779	11.1778	3.47696	19.1077	2.62357	6.2827	21.4624	3.1793	1.74803	3.42993	2.74254	8.44056	1.71421	2.3621	2.57927	1.34121	3.53943	8.87306	1.17444	1.49938
	2.74917	1.65516	1.11655	14.0981	1.50974	9.00316	3.71085	6.74564	6.67221	7.64211	1.22548	2.06498	14.6975	19.3856	1.97872	2.69871	6.85248	7.13677	4.35527	5.96212	6.6276	3.03485	1.12962	9.8496	3.87596	5.09821	7.26472	16.5344	2.07199	7.54345	1.97229	4.02812	10.9589	7.51888	2.38849	12.2089	20.2891	3.67198	14.4099	7.65761	3.14164	3.51248	1.10765	1.14917	16.9621	1.53294	21.5578	2.57624	4.59839
	2.19613	4.15436	8.53388	22.8516	5.70777	3.54037	1.35898	13.9803	8.35064	7.82336	1.54616	3.39922	14.3236	3.53398	3.91536	2.89061	1.12165	5.63988	5.00066	3.0888	2.72486	24.9027	1.83473	1.55318	9.04914	8.06274	4.54488	9.49373	1.21477	1.53469	1.14423	7.05927	15.0507	1.16913	2.52757	1.47239	18.5585	1.44999	7.38081	2.69763	1.93518	1.08858	8.01818	17.0063	18.6912	13.4999	4.02027	5.45205	2.29849
	1.85856	10.6984	9.61777	3.45756	7.57362	9.43768	1.20618	29.8298	1.54572	5.73833	8.5525	3.18739	3.4722	67.8737	1.26374	7.45316	3.47575	2.23684	6.19418	5.90021	14.9658	10.2852	2.52884	3.50858	3.02803	3.58327	5.85486	5.88003	1.64405	1.56129	3.88632	5.17655	20.9217	21.8509	6.46229	1.92418	1.6363	4.48896	2.20693	2.07043	5.64743	3.70359	8.30265	3.28031	5.737	11.7214	1.00043	5.01443	1.77136
	4.23291	2.78951	3.53179	7.69061	4.29398	3.46687	9.96947	2.31106	16.7013	3.10255	1.47198	4.24579	24.3691	40.0425	2.50995	8.18601	5.58466	1.76313	4.84506	18.8637	25.9166	2.13848	19.5495	7.65768	4.02538	5.60587	6.29376	10.2311	3.2352	5.9334	4.23915	1.51557	1.71081	5.22781	2.99779	1.40431	3.42244	3.67721	31.2448	5.73534	7.8802	2.09519	1.48537	1.05242	11.8381	23.1894	3.97741	1.14169	5.95127
	5.65676	2.99238	2.01113	1.6405	8.57181	4.22795	10.6304	4.42836	8.66108	3.00253	1.34896	6.55346	30.014	1.40568	1.8855	3.17404	4.40584	26.4206	1.00104	10.4707	6.18535	10.8879	4.13853	6.10583	8.23109	4.62975	1.79439	7.83003	1.25512	5.10251	2.69692	3.39241	5.92301	6.38551	3.71305	3.34086	4.35153	4.30862	11.6379	10.5433	1.81134	1.82963	1.78245	7.48912	23.3689	17.1498	9.05467	2.56396	7.90628
	1.55823	1.22109	6.67775	2.1524	1.39765	3.02982	4.73412	3.49119	3.98474	1.63948	2.47255	5.08816	2.14465	4.20096	3.38867	4.27967	8.59654	3.55392	3.28401	9.74122	10.4722	6.51003	8.91965	1.40129	12.3132	2.78811	20.6172	4.89807	5.04828	2.30795	2.38796	5.47632	11.8591	7.22499	4.54324	1.92361	3.2199	3.38962	10.0198	7.37433	1.08696	4.15985	1.31337	4.72314	44.121	3.22043	8.79396	3.4206	1.07249
	2.68553	4.25614	2.2154	1.39077	4.27045	2.67367	2.2053	9.81668	6.93178	5.65073	7.8299	2.06231	8.1235	1.99062	2.61553	2.9066	3.18812	5.51729	2.85611	20.59	4.85947	4.65139	9.30264	10.1364	1.34787	5.64658	1.49973	2.27293	7.77574	5.88611	3.50338	1.67789	4.7249	15.1729	2.10371	4.92071	6.86422	2.03241	14.2328	9.5154	2.94973	1.16051	3.46629	8.65102	3.49802	9.45719	5.16741	1.2857	4.52969
	4.37247	1.85629	2.74905	3.05294	1.80126	1.84053	26.2713	5.6603	4.52726	3.29502	5.81749	4.18825	7.46042	13.0444	2.03831	2.10923	1.05563	3.04721	2.90309	6.19854	4.00209	5.7021	13.0395	1.72512	1.44361	12.7297	1.06121	2.46771	5.33163	6.29786	17.4155	1.60781	12.6305	3.64609	3.55021	5.88674	2.07135	1.55282	12.6423	2.06813	1.14197	11.746	1.30234	1.46574	2.73921	3.1617	2.24919	1.11862	5.02879
	7.50495	7.6018	10.5467	2.96235	2.06188	1.16575	5.62716	1.23091	56.7731	5.10272	1.72787	20.6921	7.11103	6.35523	2.68709	4.64692	2.74017	3.13082	41.0061	10.5747	10.8918	25.0625	24.8283	7.56236	4.3602	1.32142	1.55334	1.15038	3.03322	2.22521	19.372	1.63268	4.4448	21.8165	8.10436	14.1523	3.67478	1.5243	19.2677	12.6675	1.82311	6.57246	1.23902	4.20542	1.10278	1.03371	1.80643	1.03377	4.45609
	5.30316	3.54609	23.8662	1.82984	6.29728	3.86008	6.25629	1.39979	7.42052	9.91537	4.67559	1.05116	1.97101	3.93013	2.0907	4.72853	5.42198	11.116	3.24385	7.73291	13.1759	7.18359	4.03601	1.14429	14.6909	3.38624	9.81351	12.1906	6.40405	2.04248	6.04255	4.34236	1.11431	23.07	2.706	3.52259	16.9638	11.1312	8.6914	4.87055	1.57645	1.29559	4.77682	3.44878	3.35665	31.5432	2.45158	3.23975	7.24246
	7.39132	7.88547	24.4591	8.4835	2.10202	1.06447	1.54359	7.51702	6.53658	2.74277	2.82517	7.14819	8.5373	8.64019	1.84838	8.63708	15.2404	1.75967	3.52297	1.23517	2.58777	39.2511	32.7771	17.3224	1.27189	1.37118	12.7358	3.6298	3.02246	5.5645	5.55488	2.23176	5.46607	6.45701	7.37312	4.7086	6.34795	1.01299	11.7328	11.2653	1.45696	4.87456	3.2968	1.50818	2.10929	4.32682	4.49	2.15388	8.31144
	3.91136	17.7381	7.67916	3.18082	4.52784	1.23691	4.8098	7.67451	8.51258	1.21938	2.01429	2.1027	4.42234	1.83233	2.76773	5.98028	4.93749	6.62628	3.15872	3.71189	4.73918	16.6989	20.8559	8.19619	5.23498	6.20853	1.48565	1.33564	1.55662	5.58666	3.30373	1.44549	3.73072	6.64364	1.84503	13.557	3.03331	12.9142	6.80257	3.12407	4.62418	1.68744	10.0038	6.4104	2.17333	7.83358	1.07555	5.83944	4.24369
	4.28619	2.43238	13.6428	7.30978	8.68713	14.3327	1.36859	1.38063	12.257	8.85937	6.15226	7.53223	3.1228	2.0978	4.47176	3.24077	6.05795	3.97514	11.8902	6.91307	4.48208	13.4081	4.21191	12.748	6.60514	5.52846	6.58052	5.53148	6.73694	9.90607	2.81279	1.08514	7.44551	3.26641	2.01956	3.06349	2.83318	3.49043	2.30308	23.1329	1.24534	4.32839	1.07804	6.26272	5.67256	1.11887	14.3803	4.51205	1.84286
	5.93776	1.54568	20.3964	5.82347	6.46795	7.38124	1.31225	1.09828	3.01486	7.03348	2.88057	6.37096	12.4674	1.28366	3.74935	2.71525	3.35669	6.95917	1.12279	16.4837	1.1248	3.57711	29.8902	3.23287	1.83819	6.38545	3.17861	1.81307	4.14308	2.88272	1.0192	2.16123	6.61256	4.5435	1.2447	2.10872	23.1571	9.37275	2.92019	4.43335	1.5048	3.72576	3.78289	1.57396	1.35853	21.3331	7.2341	11.2461	1.00379
	3.00283	2.26798	10.2134	6.28314	1.88614	2.03921	10.8512	11.5154	1.58723	16.2899	2.14482	4.37685	2.56406	4.59299	2.41962	4.08391	4.40938	4.0553	4.23908	2.47673	4.43284	4.29916	11.3055	11.3903	7.87855	7.9793	4.1943	20.0082	3.634	2.22275	1.32293	2.39092	12.7548	1.62892	2.078	12.6596	5.88196	6.34022	9.18798	16.2276	3.25269	17.6435	1.28974	3.00405	1.62677	21.1657	13.5093	3.78157	1.76645
	2.50589	4.4807	5.10449	1.04689	1.81003	5.71197	16.3561	14.6781	13.1854	4.10036	3.21441	7.78559	40.7183	4.07441	1.66299	3.03012	2.29398	3.85066	5.75113	6.65836	3.53124	6.28278	1.88133	1.571	3.93269	4.12963	7.00573	2.60464	8.42717	1.89227	1.32752	3.0108	33.1833	4.69581	2.78469	1.21358	1.26311	3.0221	5.56837	2.47807	13.6768	3.65926	3.8166	1.05454	4.54119	11.6259	10.2199	6.31911	22.5763
	4.38614	1.30958	5.40286	5.93749	10.4077	1.43099	7.20256	14.875	5.70643	2.97282	1.77201	7.27849	5.25626	2.27011	2.84774	6.82508	2.06824	2.0847	4.65789	3.51051	6.52853	3.09307	2.28516	1.95941	4.15809	1.55515	6.29357	2.97956	1.28763	2.02475	1.8669	1.60465	24.6786	12.9183	3.82408	19.1033	1.84029	4.50784	58.7686	6.30918	3.66798	1.11994	7.97974	2.66117	4.69666	12.4919	4.58368	1.46358	3.44388
	3.12871	9.53295	6.74473	1.50267	1.8949	32.8337	15.2617	4.84592	19.2432	3.3226	3.08012	3.86136	2.52205	5.1466	12.558	2.86634	2.69714	13.0074	3.29715	7.62804	18.4965	5.43114	1.69663	4.24219	3.0179	8.08335	1.55083	5.85367	5.06419	5.80485	3.18132	1.60193	6.80885	3.24924	1.10679	12.1853	2.1777	5.28385	3.90478	25.9514	1.43597	1.97684	1.67691	7.15642	34.1364	1.33986	2.44186	1.10969	1.19726
	2.27157	1.24942	2.02884	2.04157	1.7842	3.10738	3.9113	16.5882	14.8761	8.22649	2.86555	7.91818	6.41786	1.3793	4.49134	1.31572	3.30247	1.53869	9.95282	10.6338	1.43939	5.62288	5.2851	3.27652	3.2119	1.70745	5.2852	6.29449	5.00232	3.30678	1.19136	2.96197	3.42928	1.35075	2.05034	7.85761	6.4166	1.54398	5.65004	11.6158	1.53576	3.96706	7.26336	1.26799	19.4101	1.75687	4.3075	39.9282	3.52239
	2.63696	11.525	10.8522	1.43127	2.01345	3.68855	4.75515	3.07778	24.7351	1.35335	1.61706	11.2541	4.82005	3.27923	3.24617	1.41166	2.43367	1.13162	1.80354	44.6375	1.56941	3.92354	7.05035	1.77946	3.2195	3.25807	17.3428	6.56835	6.2422	6.33776	7.36156	3.78577	1.64868	3.64396	2.43758	6.59171	4.32204	3.13737	1.45219	12.0111	5.52	3.64463	4.35342	3.67412	2.20676	1.92535	7.12672	1.24961	15.352
	11.5592	11.0241	3.37292	1.05009	1.00234	2.30896	6.13763	14.7786	3.64508	5.93716	7.94634	5.53354	3.04718	2.81012	2.41653	7.35831	2.29398	1.31425	4.3621	1.97063	32.9219	1.2235	2.34193	1.07703	10.821	4.26886	13.7847	3.36765	1.907	4.7809	6.14467	3.6013	11.1702	15.7721	4.27248	1.41162	10.2799	2.2983	13.8607	16.4959	2.12965	15.0799	4.20567	2.33865	21.6217	3.33753	5.28274	1.63253	1.02412
	8.87364	5.86619	12.6624	8.45686	6.38492	2.61352	3.06628	3.41918	4.94292	12.035	9.45307	3.8206	2.64108	1.78039	2.09998	4.73791	1.27077	1.62388	11.5987	4.18472	4.1501	3.75655	4.75333	10.3788	13.1616	6.96599	2.88066	30.7827	1.5963	4.36521	1.15994	1.39847	7.58061	2.35612	3.20037	8.38817	4.6638	4.1833	3.65912	14.941	3.15238	1.48253	7.70314	2.35138	8.69975	1.82367	1.29384	1.97228	3.1642
	4.62753	1.0434	7.46825	4.0025	1.54203	1.60063	2.13182	5.70019	17.8226	5.27034	1.39451	5.81052	20.1365	3.74669	5.05248	5.13273	1.02734	1.90459	1.59717	5.2271	14.339	1.58478	3.58169	1.93046	1.91164	4.64835	1.67502	8.6011	3.07739	1.40812	1.18743	1.03178	1.09519	1.09047	5.72794	5.68588	14.0678	1.54157	2.45456	4.10862	1.01864	4.59395	1.09001	2.96289	7.41694	10.0768	26.4738	37.1354	5.30917
	8.46487	1.14588	5.28219	9.53573	11.9423	2.04237	9.5765	27.9757	3.35218	2.81885	7.70312	5.80405	19.6975	4.344	5.89635	5.78728	7.61046	1.26584	30.9305	9.58258	15.0009	1.83013	2.5568	4.0618	1.30735	1.38325	8.85257	6.9645	1.77721	2.55224	1.78115	4.6679	5.40808	15.5626	1.38105	9.74297	23.0754	1.21422	70.8135	3.00239	4.63825	8.27872	28.0573	8.64593	27.6068	17.2464	45.4302	4.86669	4.09649
	1.24705	1.04899	1.97459	2.74708	7.19399	2.04553	7.43404	3.56113	9.82153	6.47668	3.26559	6.59727	8.06888	6.38944	1.04638	2.56912	1.53777	1.95111	7.18966	2.19382	5.47745	2.56464	1.34212	8.13473	24.0216	2.15831	6.68099	2.44061	1.61222	3.67962	4.65612	1.29629	5.6751	1.71186	4.79997	5.78322	5.12255	1.44116	1.88686	2.68151	1.87838	2.31809	1.03614	10.5127	6.95698	2.19847	1.38001	1.1015	2.76955
	1.99246	1.05354	3.98572	12.5045	3.00288	2.55733	9.24831	5.49763	7.14224	2.37056	1.2452	5.45886	4.6163	4.73108	1.69887	5.05939	19.3238	7.28199	6.00549	2.38815	2.33952	3.17127	1.22485	5.89871	8.32987	3.78232	4.80715	4.63666	5.66407	2.11144	1.03491	1.04896	11.8218	2.91245	5.74392	3.51078	3.5868	4.36605	1.38962	21.5887	6.05785	3.27201	4.58465	13.5554	9.01068	2.28987	7.08784	15.99	24.4135
	2.95379	1.61949	10.674	3.75809	2.38339	24.8695	10.2433	6.68658	4.2671	1.71253	1.34615	2.19795	15.0938	2.56938	8.3533	9.52544	4.26733	1.55032	6.45865	5.20441	2.02434	1.26636	3.98958	4.60655	2.75602	3.15553	2.43771	13.4875	2.92204	18.7641	6.6762	1.09011	13.1843	5.03188	4.82607	1.08418	15.341	1.11541	5.38002	5.93417	8.15475	25.1172	5.65733	1.71993	15.4719	14.661	13.7864	3.69412	4.50305
	1.29373	1.14518	4.32506	2.00249	4.63024	2.18098	2.57412	9.36494	5.71052	2.60334	10.0635	1.47139	7.63757	4.4149	3.97496	3.41392	20.0116	1.23095	2.02633	18.6692	19.4346	1.42856	3.35224	1.12825	6.49471	4.19699	5.9964	4.34082	2.25872	5.63197	2.80101	1.52597	6.42839	2.55135	5.64029	1.13088	3.66656	10.7191	8.833	5.41522	3.37167	8.38494	11.6691	2.25208	8.05693	2.40257	1.89348	2.99935	1.68794
	6.59972	2.1585	3.03358	8.97551	1.6924	3.66221	9.96636	6.01621	9.83205	1.0457	6.11329	1.35862	26.4234	1.90282	1.56647	5.79114	4.9811	3.98488	1.95914	8.93944	74.4585	6.10009	2.42818	10.9569	6.84016	6.46537	3.64046	10.2033	5.74925	11.2388	8.99412	1.50201	4.65703	1.95641	1.52558	43.3356	6.63896	2.83934	14.9921	1.43364	1.70976	19.3816	3.32232	3.33675	12.7665	4.91012	14.1938	18.1074	3.07026
	5.52758	5.92845	2.34161	3.57941	6.39184	2.60937	7.4478	2.15875	7.03701	3.28593	5.67569	5.81205	9.00783	33.9869	1.28065	2.16492	1.45584	7.03115	5.80013	5.85174	8.91994	8.10027	3.14804	3.91481	6.60767	2.40058	1.78552	12.4594	3.59768	4.85379	3.43465	4.64846	9.49313	4.30037	3.03597	7.8171	2.78436	1.14032	24.6701	7.93129	1.95386	1.09318	1.14955	7.77684	5.68585	45.1859	1.43303	8.68547	4.17079
	1.19708	6.49369	62.9993	7.54319	12.0189	6.32019	1.39105	7.16785	9.55963	4.16765	5.38458	7.31354	5.0231	27.755	1.41676	25.8627	3.80936	3.21758	1.78763	1.08909	13.0146	1.85164	3.09483	3.27251	3.16986	5.86573	2.07671	18.2589	2.90141	7.67544	8.5994	1.25514	74.0867	8.97832	1.97905	4.84082	1.41828	1.26443	22.9676	1.38182	5.86492	16.7122	1.968	5.7433	6.8148	2.95136	10.5434	1.03712	1.00379
	2.0462	3.26206	42.8288	9.37445	3.61821	14.4765	10.4377	10.5471	5.11363	1.21817	1.02733	4.36122	6.99481	10.5253	8.17367	1.7337	1.42166	3.82457	1.08086	8.54241	10.7517	1.87179	10.6527	2.21419	1.47096	5.87729	7.42748	29.9208	5.87299	1.52928	2.87039	1.31844	10.234	13.5104	3.36984	1.82572	12.066	1.51547	13.5709	10.1483	1.61892	6.03172	5.39585	9.54388	4.54119	10.2633	2.00395	3.36218	1.23862
	5.02074	2.11198	8.48017	5.91121	4.14867	4.46776	6.28472	5.40179	5.39658	2.20658	1.45649	9.68407	6.26592	1.50832	7.03099	4.54159	15.2368	2.6612	2.25266	10.0514	6.21099	5.69545	4.34324	1.11934	3.41046	15.0076	5.05302	1.60291	4.12493	4.21795	6.19507	1.32432	19.868	4.69437	4.05978	15.5875	1.43134	2.48106	2.04097	3.27147	1.60792	2.18469	3.8103	21.7786	4.80017	15.0134	57.461	1.21202	1.16291
	1.71381	1.28055	10.5993	1.41954	1.26757	4.83861	4.41579	3.17673	6.02271	2.38481	1.48888	6.00445	2.36731	26.1638	7.14235	10.6366	40.3298	3.97986	30.4804	7.12591	2.03967	8.62904	1.11555	6.84701	1.82654	8.36683	7.43693	17.6906	1.69023	2.43601	8.50906	2.39227	2.35257	1.02182	1.41962	2.10478	2.8182	4.16	3.92519	14.6999	2.08129	14.5388	18.8341	8.76178	3.99584	3.30449	3.59209	5.58825	1.72159
	1.78124	2.29911	5.1521	9.03839	2.20349	7.24948	6.24188	11.6879	10.7943	14.8417	4.18493	2.21624	12.0144	11.4309	3.91021	2.59725	2.74724	4.36084	1.69922	18.8968	6.54828	5.20919	2.65	2.70861	1.94558	9.49575	2.70228	1.26974	1.26834	1.03429	3.34236	3.31374	1.68628	16.9591	15.4938	46.6005	1.16305	1.25479	1.99882	22.3786	7.98997	6.71757	3.20198	1.16911	32.0662	3.7784	4.70299	5.92391	1.32414
	1.07496	1.96892	8.14305	2.85081	2.10801	1.32205	1.86763	15.2635	4.35012	5.30792	2.12604	2.30501	4.55047	41.4469	12.3466	14.5578	7.77608	2.49051	4.94913	10.3064	8.37096	1.8081	4.35154	5.10007	6.38378	8.86846	1.60386	35.5262	6.06533	3.59392	5.03972	1.1819	3.05678	12.0095	2.34097	9.70696	15.079	1.68416	1.45021	8.73888	1.80392	2.15416	4.56102	1.16487	3.24187	37.5355	11.0515	2.91711	3.83152
	2.37954	1.43585	2.08531	10.5823	1.86354	2.74492	18.4697	2.78767	31.9317	13.2159	1.04424	2.66619	4.33342	7.57912	1.1266	12.083	2.34644	3.68626	1.37463	7.12723	11.526	5.71491	1.45328	7.46036	3.25546	1.61446	1.30881	3.28052	1.3477	6.07968	3.17216	1.81444	1.555	10.0194	5.20396	6.02008	1.72621	1.5002	7.41506	2.79589	5.60342	1.79032	1.62588	1.55655	8.82742	12.8465	1.55323	1.81933	1.91646
	1.40217	1.57577	3.48972	10.0437	7.66033	2.45209	1.94072	1.16978	1.69772	2.51908	5.93816	1.02716	7.31968	14.3194	1.69042	3.78007	2.69184	1.23033	24.2791	2.70895	9.86636	13.9579	4.05516	7.60022	12.371	2.56494	3.23916	3.80994	4.91669	1.17762	3.58848	1.2782	2.8076	2.04293	6.31504	3.69757	2.13516	6.02411	1.03201	3.36014	4.06228	2.01448	7.96115	5.86594	2.11734	2.43377	2.58459	14.1293	2.52421
	3.79538	5.03056	5.10948	11.3432	4.57443	4.04406	4.45409	5.91933	3.15341	7.58088	2.00443	2.76182	14.0988	14.5803	1.55307	12.6008	1.4918	2.03063	5.38966	6.84917	10.0925	1.16921	28.6701	4.21101	1.01356	1.145	3.60922	14.1099	1.05808	3.49739	8.72312	1.77329	2.70882	1.40867	1.18509	3.60079	1.87944	13.8762	6.64056	1.24403	5.72777	21.2915	1.57957	6.87422	17.0761	5.50186	1.31372	1.10671	1.77767
	10.909	5.75775	3.63752	5.68563	3.51996	1.33999	5.41412	3.88388	1.47791	1.06753	1.595	9.72522	15.2177	2.67615	2.13978	8.08069	6.08919	1.37995	6.63926	10.105	8.37037	2.23461	1.71069	9.41576	7.32593	9.75712	4.97897	11.5887	1.9404	2.52023	4.68165	1.92928	1.73344	18.6481	7.19119	5.02536	3.41954	1.19534	7.56719	6.66039	2.70844	42.6419	5.57857	4.90986	7.59859	2.0832	14.5681	1.07285	1.91436
	7.20085	1.09062	8.58757	18.3272	4.43374	4.31634	5.50227	6.48868	3.74563	4.51652	1.21655	3.84307	24.1373	12.4582	5.36429	3.28543	1.26841	2.86646	5.82109	14.3316	2.11013	1.83559	4.90737	4.72102	3.24178	1.84316	6.79534	7.66088	5.78624	3.42745	8.47109	3.34267	8.97183	1.97643	6.24452	7.94088	3.92372	8.4638	8.15268	8.83907	1.05932	16.3927	24.9631	2.93446	3.3345	2.4312	6.40557	1.02261	2.26204
	6.03772	1.42221	17.0102	5.23626	1.47745	1.22302	4.00542	3.45441	2.10695	6.43789	2.79089	2.52674	19.409	9.21524	6.43294	3.37311	1.87138	2.88878	1.97809	5.67283	10.1394	4.47912	12.9264	4.35622	1.47197	5.37868	4.00377	4.52096	5.35853	4.23026	4.02575	12.475	3.20973	6.83528	1.40988	1.93993	4.6638	3.99974	4.73591	1.66433	3.61347	2.7618	4.05729	1.46617	1.77257	5.48791	1.50108	1.31771	4.50866
	6.80292	1.55863	2.73133	6.90624	1.72654	4.32436	4.23469	2.42866	12.4073	5.36521	1.81755	6.57403	2.22797	4.13047	7.38652	2.57905	1.1134	2.12588	6.76732	5.39543	3.9443	1.87913	1.26433	5.66308	1.66192	4.33471	6.28991	8.35946	5.53674	13.6143	4.53699	2.59257	1.95554	4.91962	1.65375	2.47555	46.1208	1.26804	21.6373	15.0139	1.68954	2.00779	1.00747	1.3448	17.1663	6.09617	3.12192	1.12569	1.6529
	2.11457	1.53134	6.99771	7.15348	2.43413	4.13191	1.13166	12.436	6.25655	5.85532	5.03196	1.9663	1.52779	3.64487	1.00988	7.76361	2.05999	4.58779	3.87888	4.80605	23.7074	4.56363	3.19346	2.17544	2.94952	2.09648	4.86539	2.37252	4.4011	6.64016	1.53502	16.2712	6.63391	10.4549	9.06077	3.22665	1.33659	1.92918	5.47881	11.4377	5.20988	11.4006	4.76264	4.97309	21.8521	7.26827	1.66149	1.19714	1.15731
	8.29043	1.53344	25.9974	14.0381	1.28187	1.0909	12.4445	5.94265	18.0506	3.39989	1.21045	4.2214	1.06638	2.89916	3.00406	1.19992	1.35741	2.98686	8.01869	7.5615	15.1118	1.87743	5.05768	1.86453	6.76267	3.01429	3.84506	10.1447	4.93731	13.9561	5.2518	1.77013	1.4457	5.20279	1.10718	3.17376	2.5591	9.52338	81.098	4.51242	1.60536	1.33197	3.95616	4.38619	4.65718	15.9091	9.37106	3.67625	3.47823
	3.94625	1.05704	5.3442	12.8551	1.58262	5.92491	2.16129	3.88751	3.3896	2.18991	1.29215	6.51079	21.8933	3.86747	7.01635	1.12878	1.08039	4.57144	1.29885	24.8523	3.00437	9.24131	4.97651	13.5301	1.49375	1.30433	2.02445	9.06681	5.72683	1.1855	5.75781	1.67699	1.76531	9.45669	1.13834	3.19233	5.07131	8.65338	35.8444	2.93215	1.99353	3.1616	2.24145	1.40379	32.4968	36.8813	1.43259	7.89209	1.55406
	2.79255	6.79136	1.01913	7.86254	1.62506	4.34267	1.27148	19.6572	7.00018	5.82895	1.97673	3.18662	24.0092	19.4903	2.15421	2.69485	1.7588	7.3194	5.14237	1.80296	1.35683	3.07685	9.1757	8.82824	1.87669	2.93387	1.51265	35.4362	4.58021	3.62889	5.6714	2.00163	1.33768	13.6005	1.83413	4.99217	2.83367	6.35909	11.3943	2.82468	3.865	3.18001	5.04144	2.67772	6.70646	80.2564	1.48032	4.43986	5.30357
	5.27911	9.94709	6.16901	1.50267	15.7704	3.24383	10.1807	14.8066	1.91695	11.259	1.29309	3.51618	9.25499	2.17654	7.62244	1.85943	2.03464	3.14591	2.55552	1.01197	6.89412	4.88564	1.57122	5.30363	1.27037	3.29024	3.06328	5.91885	1.63957	3.97169	3.86996	2.19379	1.86982	1.16698	2.43135	6.76443	3.87828	4.55483	4.6503	1.22599	5.95883	8.42049	1.37039	11.5091	10.2911	2.09826	11.2486	1.8986	7.57682
	5.76615	3.49572	3.88885	5.61032	3.65927	1.28173	2.55491	3.4197	10.2904	2.22356	1.12687	7.88693	40.8275	1.11877	9.06353	10.2908	7.64936	2.42859	3.79956	4.30172	10.0418	3.45811	3.02061	6.84033	1.78703	2.88461	1.82197	3.22194	6.07519	3.3452	15.9649	15.8982	1.02795	3.23637	3.87901	7.20159	4.06826	3.18035	3.29755	32.4042	1.76324	1.0522	1.22484	5.07111	6.58362	10.9696	2.03356	6.40098	1.02693
	7.72418	5.46009	17.9003	33.7259	1.83217	2.12895	2.16155	3.69427	7.75024	4.72991	49.1998	9.56635	18.6598	3.21121	1.77167	4.76934	1.76587	4.75785	3.06981	6.5114	7.88183	1.92438	1.23197	2.84891	1.90607	3.28873	19.8409	24.3446	3.21009	2.634	6.7194	5.28688	1.64071	5.09696	5.29006	1.99	2.45227	5.65217	3.74474	2.55752	5.28025	5.48848	1.2995	1.30321	1.398	1.03151	2.92219	1.24142	5.78864
	2.88496	2.60237	1.12098	3.84655	2.20349	2.63066	1.18554	1.42362	10.312	1.43852	1.17007	3.57447	6.90379	2.04174	1.70196	1.85943	1.41282	1.44093	3.77178	5.7744	3.68662	9.84897	1.4909	6.33255	1.62343	1.25005	5.1211	3.952	6.79791	5.02913	3.04648	7.8912	8.49322	4.44196	2.5042	8.06072	2.59632	1.95007	5.84959	6.54908	2.95766	2.17507	3.41935	3.25909	7.38109	3.51997	1.18735	6.79394	14.0265
	9.405	7.35451	6.62904	13.7695	2.05404	4.59258	7.15907	9.88248	6.97446	3.54993	1.2189	3.48494	23.816	10.9528	5.02113	1.18833	1.78238	1.63425	7.98459	4.1726	22.3287	5.0043	14.6536	5.12056	1.68775	2.72126	5.9964	51.2632	12.1369	1.65438	8.72901	5.35244	1.16848	5.1892	1.17613	2.92677	1.36753	6.01367	14.0563	1.44208	2.37094	5.81927	3.86669	1.21325	8.15722	6.13986	19.7107	73.1072	1.98025
	1.06695	5.37649	6.34893	14.1396	7.95601	4.76943	8.47093	7.39994	12.8189	1.47459	1.84948	3.70744	27.2167	62.0181	1.89354	1.30689	8.90657	4.4259	5.12746	5.22027	3.95462	4.70397	1.20604	3.01639	3.43325	3.89591	5.01985	10.193	25.0827	11.066	1.43291	11.568	3.32126	27.9203	1.82205	11.1985	3.43356	4.4255	1.76766	9.34689	6.58623	1.25293	4.17731	2.5101	10.3217	8.37172	1.62393	6.41847	1.17693
	11.5606	1.43376	1.12818	5.4565	2.22979	2.57853	4.83745	1.01954	7.76369	1.06692	1.85324	10.96	121.596	13.7006	6.41335	5.80327	1.12931	1.49217	6.50892	1.94287	76.8936	6.14175	1.31602	6.51874	4.50709	1.07915	6.9957	21.2465	4.58537	5.18427	1.03164	4.99073	6.86111	4.11733	1.39507	10.7067	2.62146	1.50462	20.4024	2.34565	2.24275	1.30186	3.93159	1.60366	1.58367	3.12168	1.04727	5.8238	1.76505
	3.74917	1.88532	87.082	3.97728	1.68733	1.80148	6.78064	7.77553	11.248	5.1882	2.12134	1.79333	2.39042	1.96259	2.7535	1.11224	13.5865	7.315	4.66698	9.16263	3.10933	8.85425	1.16757	4.52147	2.62179	1.36163	13.26	10.8242	3.96622	5.45417	4.57823	8.37816	1.91921	8.15885	1.49636	4.27257	5.26273	5.91084	35.0567	1.38451	4.46758	2.01615	3.47101	9.80358	5.41116	25.6764	1.12813	1.4059	2.09241
	1.90099	19.0334	3.88553	28.955	3.69386	1.29328	7.42014	16.7431	1.97249	4.01883	2.07251	1.50873	2.59137	16.6175	4.39277	1.15139	4.87619	1.94262	2.64646	23.7819	9.75374	5.64508	2.78574	1.69527	7.93883	1.51343	50.1895	7.48953	2.97942	4.36718	7.11216	1.05394	13.3749	9.25433	4.62934	8.78932	6.19617	2.9265	7.93995	6.63659	1.37508	15.4714	1.53956	2.02208	6.06928	2.8717	10.3083	5.83683	6.39498
	2.48609	6.14951	9.93608	10.3691	5.46791	8.26272	9.00827	1.21847	1.00437	2.63396	2.67069	2.27986	6.5971	6.15036	1.59988	3.2154	10.0583	4.69624	1.27031	1.83424	3.12643	3.53733	4.08651	2.53712	1.46134	2.92884	4.37943	6.76753	3.55016	2.34489	7.56841	9.12736	3.90757	48.1208	2.8965	3.4607	2.3029	1.19615	1.38896	3.45802	1.98866	4.5768	8.4315	1.41906	1.07216	3.77987	8.59511	3.79199	5.58956
	1.75059	7.9208	4.16121	6.05863	1.60338	3.37659	4.47317	4.21129	3.46852	2.44815	9.3277	8.58872	3.41688	1.90818	4.6656	2.35847	5.4267	4.38598	5.23962	2.02703	5.74693	7.91946	3.2282	1.46722	1.00242	1.5084	3.93666	5.86685	1.95901	10.105	12.6939	3.55699	2.0352	1.37864	2.31681	6.14723	8.69581	2.30553	3.92453	1.5795	7.4186	1.30061	1.2198	4.62553	1.62436	5.68907	6.74494	11.3086	5.86575
	3.71853	1.49322	9.68033	10.2689	12.3671	6.41868	2.26735	5.0521	4.53837	5.35854	1.81239	2.10422	14.4314	4.027	2.85805	3.85231	2.05056	1.04675	26.1539	3.40608	25.9116	3.94744	4.37307	5.54995	1.35041	2.62224	4.07994	3.20436	5.84699	5.42758	3.03731	10.2202	4.78799	18.8362	1.88983	2.11434	5.67652	2.40997	11.8658	1.77104	3.00219	1.45701	5.6337	5.89097	2.29738	3.9021	18.8248	40.3856	2.19545
	6.49081	6.99178	5.41062	9.74283	2.47103	3.63037	6.0857	1.9909	2.62551	5.14849	3.10125	5.25732	9.06454	2.68646	1.75022	3.76573	4.22666	1.38624	3.63967	2.22312	7.66041	1.38348	6.49402	1.86364	1.71308	3.26762	3.34676	12.4045	4.50018	3.10288	5.1523	2.98006	28.683	4.84168	4.64648	18.2459	4.4922	6.10886	20.5658	4.8076	5.35803	1.83047	4.20409	1.85531	1.65738	16.1036	10.2721	3.16495	5.67298
	6.57096	4.5678	2.35047	7.15846	3.10344	2.33737	1.03079	2.25096	13.093	3.76483	6.16635	2.68105	4.96148	12.9615	2.10926	8.2974	4.06929	5.27902	4.49244	16.1255	2.055	3.36284	7.01544	9.25674	1.57632	2.21259	1.89023	3.90367	6.65422	1.67506	4.21296	5.18243	3.42482	4.69939	4.39793	5.36687	5.26853	3.35507	3.57285	2.13875	2.86171	2.2884	10.1742	1.42203	1.39518	1.5792	6.30261	6.23352	4.91943
	4.2909	1.29419	8.08604	1.18828	2.39954	1.34063	1.04533	1.52206	3.28554	2.45846	4.95965	9.20898	4.61979	1.12702	2.20969	4.79746	1.06919	4.79777	4.86173	12.5775	13.9124	3.07907	11.6103	2.79101	1.49679	1.67829	6.65399	4.2881	5.07069	5.85706	2.65896	6.57909	8.10765	2.80876	3.55216	15.376	5.10176	2.68832	7.70681	1.29508	2.57257	1.32361	3.27853	2.87038	1.50634	8.24398	1.20325	4.01787	2.02792
	3.35361	2.62966	6.88424	1.92221	32.8624	2.63246	6.91345	8.40497	1.69012	1.76709	7.87732	4.08539	5.64906	4.7859	3.2639	1.24514	2.33229	7.28577	5.08958	6.20118	8.05873	7.01814	3.33157	2.76607	2.34573	5.08565	8.83695	1.28658	1.29704	20.577	3.3489	3.65194	2.67918	2.85596	2.90312	2.39284	2.53154	3.58041	1.26252	2.59092	7.85026	5.87239	3.72587	6.30303	6.09506	6.28631	1.36984	6.02661	3.80629
	1.2381	7.98901	5.26835	1.3691	3.93142	1.31312	2.45469	2.59961	6.34073	5.31095	2.51997	4.72279	13.0822	10.9783	4.39153	1.75907	2.22915	2.19221	5.8461	5.03079	8.91286	6.96966	1.54784	1.60931	1.48058	6.99464	2.46741	9.16933	4.00791	1.71791	13.4938	2.81955	6.52047	4.28036	3.61371	26.5047	9.68387	5.54975	5.31218	1.32348	1.35358	1.54693	1.43969	15.3546	2.52051	2.70358	4.75204	3.22635	7.31396
	2.14663	1.33162	4.54262	1.57514	16.3973	1.92918	1.25629	1.60132	13.4409	5.0909	3.9403	3.80078	2.61867	2.0743	1.067	4.6392	4.28088	4.69404	6.92545	5.35005	47.8379	6.07414	4.06804	1.03739	3.7088	11.8772	1.9529	3.00226	6.86696	4.95525	3.49029	2.12732	7.34163	5.26643	5.40031	19.4117	6.75159	2.52123	9.61014	1.85894	1.63197	5.75571	3.73627	1.89986	1.08344	11.3906	1.13476	10.6682	11.6193
	1.88307	3.16622	3.48031	1.61635	4.61825	1.25026	1.76143	5.87271	5.3656	12.335	1.03391	5.88596	1.61812	14.9629	8.08397	9.14716	1.39631	4.67014	4.75463	2.86363	9.1337	2.10502	2.4575	3.35224	7.63744	3.28772	1.09669	2.72546	5.86492	3.25014	5.48484	1.33201	1.23826	3.51953	2.89105	3.01848	19.7685	5.06776	3.49579	13.5772	3.33329	8.75965	1.88609	7.73185	2.10043	7.46649	1.23153	1.74826	9.072
	8.08534	2.8878	20.3283	5.27853	2.03144	4.19909	6.30912	1.10761	31.0033	3.74816	1.64665	4.09605	3.93991	4.9277	3.39712	8.79975	3.77281	6.38864	6.50285	5.3051	6.35694	1.58341	2.02571	5.65774	9.23807	1.72303	2.23831	4.04792	2.68442	3.32698	17.6616	15.6133	13.0046	5.21137	1.07328	5.20934	13.5085	1.88299	36.8	9.22521	1.12943	6.43863	1.28942	2.31192	1.59898	20.8298	1.21563	5.68463	11.8934
	4.86657	2.14661	8.72929	1.37016	4.15329	3.63164	10.017	1.31535	10.4441	2.7358	12.5379	2.68028	2.35961	8.59855	6.43026	5.56947	1.23658	4.08139	7.07398	1.40945	4.09526	2.75604	5.46777	3.23153	3.21646	4.65589	2.52815	1.05592	3.52281	10.9625	3.76784	2.24307	5.63846	26.8928	1.77062	8.18169	14.601	3.51132	13.0177	2.63276	1.53039	1.54776	3.70477	2.69596	1.29328	17.4156	5.64508	1.10448	9.53324
	2.01744	2.15326	1.99951	2.49592	3.79719	3.53938	2.0168	2.0655	8.38747	2.19749	1.21561	1.9404	2.17896	2.48158	2.27176	6.85871	2.30636	2.26608	2.40194	2.60562	7.60675	1.21428	9.25213	2.33445	11.4516	2.64536	13.0214	8.38289	2.08297	3.18168	1.83614	1.65212	7.56085	1.29211	1.74258	30.8088	3.11259	1.48374	13.7599	22.8101	1.49176	18.5527	4.0513	6.5725	1.019	11.3385	1.7101	2.57289	8.65352
	2.78312	5.65877	1.9602	8.30304	1.28049	4.08591	7.19867	1.08585	5.48194	5.36824	2.46973	4.95024	7.10544	13.384	1.04658	2.49799	3.91899	1.72573	1.93186	1.18802	4.57437	8.29662	4.64759	4.62793	16.1709	4.71822	8.24127	3.90879	1.25333	13.7128	3.96095	1.17195	1.97083	2.6493	4.71699	6.51801	5.3275	2.06173	5.29703	8.26753	4.03592	5.81509	10.5857	4.08405	1.23971	5.22507	1.00882	6.20338	7.68127
	11.4719	1.58136	2.98542	2.30018	3.65419	3.41546	3.10341	1.01436	1.21015	2.04503	1.97954	2.09051	17.6376	9.24492	4.94359	4.02545	4.37283	1.14734	3.61769	3.87031	1.77903	4.99388	8.75664	2.84134	1.12905	8.10044	5.69692	8.68019	3.52505	3.63234	2.7362	1.64082	9.02791	12.7739	1.43442	3.69588	5.00218	13.7569	27.1411	2.28346	1.18035	4.38777	4.70657	6.22537	2.26918	5.34989	2.92351	2.32841	3.66749
	8.75719	4.63111	5.4466	25.9688	2.24823	2.5916	1.24669	3.76836	3.50185	1.66585	3.40739	1.15479	6.21061	6.36925	8.57334	3.849	6.01139	2.34372	1.6439	1.72122	2.19387	9.40215	2.85793	1.79148	5.3687	4.12964	3.36026	15.581	3.52707	6.99182	6.55968	6.76176	10.7177	7.02906	1.40286	2.05808	1.34867	3.54345	7.98671	7.25074	1.71539	5.68963	11.922	2.94973	2.07626	15.6345	2.34111	3.62006	3.62964
	1.10231	5.42336	3.58217	1.90018	1.34784	3.19694	1.16763	1.72772	2.16775	11.9201	2.43076	5.77851	1.62582	3.06858	3.62912	1.23576	2.74547	1.54907	2.17739	1.82323	6.96371	2.48183	5.77856	3.21861	4.99792	4.74033	1.02167	13.4208	3.07783	5.06853	4.58019	1.35597	1.99473	11.2708	4.58025	1.34692	3.58486	3.6523	5.6586	2.14144	1.22232	1.26088	1.57736	2.01614	1.53978	7.43676	3.90406	1.70286	3.20205
	9.44224	1.46943	45.4638	2.4746	3.76674	1.12292	2.08677	4.53093	2.77634	4.38558	2.18238	1.59522	3.12421	3.02447	6.30426	2.34965	1.39926	1.69335	3.50276	1.74039	2.22925	3.77944	6.39472	2.15495	4.62663	2.66446	4.53524	31.1949	4.90885	3.51857	22.2091	5.31988	6.28531	6.02082	5.09878	1.10893	4.72954	1.66609	3.87448	2.77862	1.64119	1.30939	8.30517	2.41928	12.2594	5.83958	4.39013	13.1101	4.1
	1.59736	1.45544	4.8349	14.7471	3.20076	1.93324	1.64901	1.20345	1.01606	6.92103	2.87869	1.59712	6.52708	1.62086	9.81913	9.26902	3.74334	2.18403	5.7635	1.13998	10.9661	6.05109	3.99669	9.16988	12.4409	1.32243	10.9266	11.7776	7.68854	2.01983	3.8837	2.08708	8.7185	2.90673	2.48706	1.31317	7.22918	1.77735	43.9233	9.16264	1.74916	2.09184	1.57012	5.02316	19.0311	9.40176	2.14756	2.56954	7.48219
	1.14286	7.69135	1.5799	12.9016	4.1722	5.20296	1.09856	4.91793	14.7703	8.72812	1.58091	4.81194	8.1508	1.65013	2.2862	3.33947	7.39297	4.02229	3.85286	13.2544	17.9572	12.5418	8.06592	2.31084	6.05707	15.8566	3.40654	9.74635	6.73963	2.13114	8.53459	1.18506	10.6043	1.45086	7.97346	2.30113	2.97869	4.49057	7.99791	70.6085	1.19264	2.00109	1.9806	6.93872	1.71135	8.47377	1.69153	2.219	4.88789
	4.124	4.11973	3.20906	10.5432	5.02555	1.40917	1.63525	12.1749	3.24578	7.84428	3.21018	1.51026	19.8669	1.21812	17.6061	5.68692	5.33062	5.54652	2.73259	1.66922	1.54317	4.58821	1.80135	10.0376	4.41035	1.55515	5.65469	14.8253	2.09149	1.90064	6.56034	1.6381	1.91316	1.32358	2.22253	1.13988	9.96521	3.46673	18.8613	1.78601	1.04218	5.30405	1.03582	4.05095	7.21354	12.6901	1.20988	4.4354	1.33886
	1.28996	6.97674	4.51328	16.6981	1.63797	3.08619	1.51088	4.93917	4.21975	13.0085	3.67924	44.4333	1.1399	2.89462	9.05322	1.36149	10.4691	4.25396	4.65864	1.38411	2.8086	12.0212	12.2951	6.1771	8.41192	1.431	4.43169	26.146	3.37531	4.51001	3.64347	1.72356	1.78538	3.1949	7.8075	1.04986	36.1029	3.02089	21.31	1.49966	2.73659	1.18477	5.26701	3.64993	1.44512	1.63756	3.74454	2.19332	4.20093
	1.12871	6.29187	5.42502	8.54709	2.4226	1.3712	1.53334	4.82727	14.0261	4.93571	1.05457	4.43933	17.9722	5.07116	1.80879	3.67805	5.52572	1.04612	1.4489	9.27346	2.31947	10.9687	6.46911	3.72862	5.44215	2.5961	1.04713	12.5524	4.69857	20.6381	5.12874	2.9371	6.43954	9.5997	1.32651	1.29629	3.37845	1.45803	9.3467	1.00528	1.95898	2.0747	1.28501	7.50652	5.66772	34.3881	1.12637	1.97823	2.00268
	1.68364	1.68735	2.23754	1.31653	10.3994	3.1596	7.72029	1.13558	11.6485	3.0971	4.96623	2.36482	21.4577	5.57531	2.36621	3.32569	9.40816	2.3871	2.15516	1.30523	4.77456	2.47074	8.50922	3.32952	6.74392	9.55657	5.46802	73.0076	6.31483	3.75941	4.34519	1.95596	4.8976	3.29	3.90472	3.387	4.11273	2.96948	4.46129	26.1142	1.0061	1.54149	6.31259	3.34991	5.18159	4.2156	3.41224	1.44907	2.27676
	1.74163	5.07603	7.20475	3.53607	6.49655	5.0721	3.08511	5.70175	8.83587	5.69226	3.92199	12.6787	3.34686	1.22348	4.68458	3.55398	4.30623	1.11119	4.29794	10.0061	11.8014	1.72479	1.26908	1.39506	9.75726	5.66669	1.5489	28.7184	4.0579	1.64797	2.82915	4.50648	56.8218	2.77587	1.08341	1.49321	5.06357	5.4642	5.46365	20.7047	1.87992	1.15591	11.9022	2.05773	12.555	8.82581	1.53599	5.7051	2.00408
	1.42197	9.6942	14.0126	2.84654	2.01899	1.0311	1.65511	2.711	11.6479	2.76581	1.27947	3.02051	10.4096	6.83259	4.57796	1.51478	40.0734	6.81426	3.13549	3.23466	4.61948	3.41081	5.48455	2.96561	4.86318	7.41887	1.49394	10.0158	7.97861	2.70886	7.20773	10.6113	12.4288	2.19237	8.26564	1.19051	2.78581	3.51855	5.22393	49.9564	1.33976	4.41705	22.211	2.54235	15.7896	11.2445	5.10201	1.26635	2.54524
	1.16879	7.81482	1.03352	13.0903	2.65416	7.66713	5.26898	11.6149	10.8955	6.99408	1.2513	4.11205	16.8036	9.59984	5.79365	5.74206	1.35152	1.39252	4.10546	10.9167	4.79638	6.07568	6.12951	2.583	8.36583	5.62949	1.45981	40.3503	8.66367	1.12245	7.9939	3.20025	6.2646	3.49951	10.7718	4.9826	3.33156	2.50235	1.86117	4.43681	2.80004	1.40641	2.27673	3.57694	14.4371	8.96677	3.89168	1.25705	6.65434
	3.83923	6.37372	7.84025	7.96557	8.81535	1.63283	13.6309	2.23646	1.16163	6.53639	5.26016	3.59276	8.5303	1.82985	2.11359	6.05141	6.24951	8.56324	4.60939	34.8401	1.15782	5.99936	2.40768	1.3033	12.222	3.48275	1.49703	4.43968	5.60242	1.29484	2.83374	2.06538	5.67669	1.67682	5.68431	1.46845	7.70775	1.56447	11.2909	1.01795	1.44314	2.07763	3.62191	2.59879	1.31705	18.0642	3.77237	1.10634	1.75804
	1.97596	5.86374	36.2601	18.0565	2.40599	1.11182	3.13028	8.18169	8.91012	4.42559	6.44572	4.77079	15.969	1.34178	1.3388	1.34715	10.4732	5.48146	5.18329	5.91277	1.58061	1.34558	2.93215	1.93045	5.95374	7.11326	3.47963	8.91597	6.45986	1.01804	2.97382	5.27015	29.485	2.52059	1.61596	2.37484	7.68599	6.03937	4.86039	2.47423	1.22871	1.24206	2.14158	3.75687	8.6486	10.6535	1.78743	1.96	4.37408
	3.16643	1.29209	6.39875	14.373	5.52741	1.17955	8.90246	7.86309	2.38523	6.56064	3.18952	5.42305	1.04328	6.80827	7.10234	4.17544	4.05986	6.17552	6.60061	5.00589	7.49884	4.20167	3.30665	2.25739	5.99325	1.58128	1.61871	9.53693	4.93081	1.29976	1.91403	1.01777	9.0671	16.6116	4.96944	1.36774	3.69508	3.58482	1.84734	13.0279	3.72043	3.4694	1.15616	4.70659	28.0059	2.91649	1.52892	3.19137	2.58309
	2.91655	2.1543	6.54932	4.98936	3.48536	2.54344	1.75559	4.3978	8.04781	3.85879	5.71278	12.5564	5.55384	4.70964	3.11522	5.31415	4.58974	1.86058	6.12825	3.89279	10.1276	1.53749	10.3767	2.77898	4.72591	1.84617	1.53174	12.6937	1.44835	2.34883	2.13332	2.00027	23.2067	4.73086	2.0071	11.3374	12.6771	3.32736	3.52345	18.6185	4.47091	15.0026	7.09293	4.21051	4.63826	1.54946	4.34638	1.32887	4.77994
	1.56011	4.49294	2.97601	3.01386	2.44981	1.91259	5.16422	6.55758	13.0971	4.34679	1.89127	1.09002	21.4914	11.7409	4.86812	2.41031	6.14931	3.05255	11.0312	4.92062	2.81125	9.41922	11.6158	2.27699	4.20976	3.61896	1.0022	20.9726	3.3632	4.67304	4.68885	6.38784	32.9217	6.52565	1.85438	1.18657	4.25437	1.94404	2.61789	2.97783	2.10995	3.4464	13.2644	5.25189	3.89233	2.69256	1.09234	5.49522	1.60383
	1.21782	1.01052	10.3529	1.43553	1.19884	1.81843	12.3782	2.79182	6.12326	6.93043	2.84536	6.00788	17.9428	6.60545	3.77266	9.07878	5.96483	2.44839	1.00609	2.82463	12.6281	2.30683	1.00506	1.0405	29.4536	2.27995	2.5752	18.0223	9.18845	6.35253	20.6118	2.12325	27.9323	5.04548	1.22833	4.31026	7.56515	1.20257	12.0772	9.4106	1.31213	2.46572	3.79739	5.05159	8.93053	3.26741	1.06804	1.87329	1.9424
	7.02263	2.41419	13.2907	3.1961	3.77274	2.91168	10.0937	2.48823	8.664	1.2312	1.64336	3.45179	22.0774	1.24903	3.25338	3.08581	4.68935	2.55432	2.92482	3.77469	2.33657	4.54621	4.02381	2.45472	2.12489	2.34277	19.9041	13.8975	6.81226	6.08657	1.90225	2.00117	10.1292	5.80058	1.17262	1.51852	2.53783	2.29148	3.81521	8.85903	5.27359	3.00812	1.19397	1.46999	3.15688	58.5764	2.30708	2.33734	1.59822
	5.67987	2.58873	1.50682	14.123	4.03197	1.06474	6.4862	2.17584	4.81197	5.70256	1.88423	10.0952	2.39252	1.79853	2.48479	7.32522	4.88562	5.4145	4.35149	7.21382	15.552	1.05908	2.0596	3.38431	1.84478	9.3907	1.6162	9.41391	6.41884	1.17368	12.4824	1.15657	1.85707	1.26709	2.44031	1.23834	1.1442	2.40354	15.6395	1.97908	3.36886	1.31692	2.38699	2.62807	1.07458	5.42477	1.7428	2.76603	3.36047
	1.1537	1.9224	2.74959	1.17656	1.07984	2.9675	7.46234	3.20782	1.11077	11.2508	1.51048	2.21357	2.3386	6.21467	1.10701	26.1109	5.70608	2.49586	4.11354	10.6578	7.17805	3.09341	2.28872	4.69207	1.72524	13.1509	11.449	9.29089	4.11775	2.04642	2.75977	1.92702	8.87528	5.38513	1.53065	3.17827	1.49369	2.66663	4.74053	9.1304	5.97316	4.57973	3.09361	5.09318	5.18159	31.6269	13.8292	38.3939	2.38471
	4.03395	4.0746	10.855	5.9382	3.18508	5.56975	11.3765	4.18436	11.2053	5.78319	2.01945	7.65186	1.90028	27.4779	5.75076	2.44946	5.69724	2.7445	14.4048	5.31744	2.97311	9.72604	5.81432	5.65997	15.2729	5.59632	6.60482	14.9754	5.62461	6.05209	2.18045	1.98128	3.80497	11.2994	3.4349	2.52224	4.50573	2.66743	9.87554	3.30716	2.10944	4.13309	6.18028	5.27523	2.15601	1.96023	1.67209	2.63467	2.0125
	4.88072	2.53522	1.31253	4.40783	7.58377	1.49944	5.6591	5.63077	2.9219	7.25384	2.30258	2.33168	5.43971	12.1639	1.7793	8.75012	3.21818	2.65931	9.94701	9.99746	11.2335	6.71611	1.86287	1.57278	2.23531	7.08612	3.25131	10.9839	5.93307	1.33916	4.0395	1.07112	22.3078	6.73803	1.21898	2.02264	1.35351	1.26363	2.22932	3.12024	1.41806	2.91779	7.24698	5.87867	1.57683	2.18232	10.1718	3.13406	5.77041
	3.80245	4.20542	1.84396	2.55667	5.71239	1.11254	1.51542	1.37648	5.76547	1.86953	2.02039	23.7279	3.97492	8.34132	1.02493	6.98554	1.80006	1.20015	1.96546	5.41372	25.883	2.72308	7.16999	1.52868	1.85997	7.4631	11.0955	8.2833	5.05657	1.22391	2.06001	1.68287	12.707	5.52886	4.45676	4.33165	1.24475	5.10391	6.68337	3.09452	2.52421	4.05697	2.64217	2.5207	4.01437	3.79235	1.44231	1.39622	5.49003
	6.12777	5.55103	3.89438	4.45223	2.75195	1.00829	8.58297	1.8733	4.38695	3.77877	2.29929	5.03749	14.5729	30.7283	1.07113	1.70282	3.2783	1.13319	2.10969	1.91092	4.06017	7.05058	1.55767	1.0169	6.62844	6.65738	1.39636	20.4608	7.53274	1.30222	5.39254	1.51377	2.74196	1.12479	1.61713	1.1832	3.1208	5.66743	13.6256	1.47548	4.12548	11.6222	3.68586	4.64336	3.0288	2.97889	5.2328	18.3102	3.00157
	8.04055	1.3652	24.6152	12.2707	17.2903	1.48023	1.40754	3.4311	2.50566	4.88661	11.2082	7.74901	7.24197	13.5968	8.17553	4.35245	3.72861	1.03261	2.91648	1.44977	4.98537	1.51034	9.20333	2.82842	4.50861	4.82578	6.35027	5.19537	1.35062	1.11556	2.5935	1.07609	3.71351	7.07125	2.95883	1.89267	3.67332	6.58804	4.17809	9.03675	6.43501	3.23437	9.14851	1.36475	17.2034	10.0651	12.3419	7.88577	1.89964
	7.66384	1.06963	4.40256	1.53073	1.6412	3.79695	1.31614	2.74778	2.68806	2.47907	1.18463	2.16328	2.97716	7.70239	4.83966	3.16688	6.53714	1.05398	1.89069	1.31889	1.45708	3.4453	4.49169	1.00042	3.78174	7.85817	16.595	36.6715	3.95411	1.1722	1.76282	3.00854	2.77988	3.67899	5.50744	2.73548	4.34621	2.48949	1.45812	3.34478	5.01925	6.35792	4.8833	2.18673	4.02001	3.82685	3.08878	1.31771	2.21157
	2.31919	1.07208	1.11822	4.73181	9.30061	1.83692	2.36732	3.95589	3.25397	8.17102	1.62646	5.65241	11.1329	15.0861	4.7518	7.03131	3.65965	1.21492	5.44043	7.20522	8.59474	4.76834	5.40185	2.36786	9.41586	4.97355	2.66275	7.05164	6.09896	9.44211	3.57735	1.85649	1.20927	1.72043	3.71266	1.15676	6.9754	1.47209	1.10445	5.33231	4.30127	5.1995	5.09374	1.49163	1.59254	2.77112	3.40384	8.78557	3.89671
	7.5686	2.59083	7.89118	6.96237	2.47287	2.37209	1.05818	6.65342	8.60904	1.39427	2.15843	2.28062	2.49334	13.5564	5.64702	5.45311	1.91205	4.34889	4.50936	6.85534	5.98073	3.37974	1.23756	4.64173	10.9162	1.7185	4.05507	6.76314	2.64676	6.58155	1.97884	1.1082	2.65497	15.8665	4.5113	1.11737	2.09552	2.39149	4.40728	2.48421	1.91574	1.77025	1.01125	2.26736	1.20346	64.6388	2.06537	3.12625	1.41947
	8.67232	12.2088	1.4725	12.1581	5.15702	4.00339	1.09674	5.04226	5.9812	1.17209	3.83372	2.28748	2.57177	9.63735	2.23299	4.04751	2.79675	12.1074	4.03574	2.48201	31.0747	1.54295	8.04592	1.17858	3.11312	1.60843	4.04755	31.0184	2.01303	5.13699	4.59787	1.07519	8.75802	11.5261	5.8604	2.80693	4.21473	2.84818	1.79136	3.52711	7.10924	2.24951	3.12416	1.14111	2.59985	10.2842	5.22485	3.13406	1.14539
	7.92173	10.4112	3.25557	1.93145	1.58493	31.7874	3.9283	11.8299	9.41932	4.09127	2.49743	17.9471	7.7097	10.7302	4.73386	5.14817	1.51243	3.42096	3.83568	7.60997	7.14739	1.87503	1.38617	1.76253	1.69434	3.96226	2.34842	23.0815	7.5435	1.12196	9.36396	11.9672	20.9115	13.1092	6.97225	3.971	1.048	1.40662	2.48881	6.39938	2.81847	1.2546	3.21741	1.56547	1.43385	89.845	3.29823	5.34785	1.86809
	5.28807	1.19345	5.64866	1.8199	1.79481	1.022	2.44625	5.95456	5.33929	4.83114	1.28605	3.51999	1.05657	13.0172	4.05931	8.45014	1.37509	2.40596	2.9031	3.21417	21.9832	3.46238	8.12168	1.84939	5.56776	1.08519	9.38154	8.69117	4.72054	8.55656	5.15492	1.02726	5.74616	4.61287	7.23288	1.32948	3.61677	1.97898	1.20193	1.72306	3.07537	1.05554	3.86102	4.58649	2.096	10.6333	4.7759	3.15676	2.76113
	2.28713	8.76273	1.23391	1.5485	3.23074	3.41221	2.3198	9.42192	6.10747	4.54865	1.40859	4.17645	8.73406	9.64024	1.40026	27.4674	1.44936	6.72121	3.35752	5.45537	2.83425	3.90885	4.83908	1.17057	1.90708	1.23396	2.11798	7.84908	1.15559	4.52035	1.71962	2.58534	4.93584	14.859	5.79222	4.67259	5.88293	2.17017	6.34353	6.24892	4.98189	5.5947	4.29451	3.35118	5.64315	1.00251	8.33572	6.87507	1.20217
	4.50212	2.9707	59.9851	5.51973	1.47053	1.34919	1.67225	1.9997	15.7887	1.7689	1.00104	6.04407	5.69387	22.652	5.59691	6.20582	2.33819	1.12691	2.505	25.1268	1.04991	5.81342	5.39626	1.70774	1.03332	3.25606	10.5667	9.57281	1.15581	2.73497	2.72507	8.31034	6.38472	2.92961	4.57635	10.57	8.7601	6.91339	17.6588	1.32348	2.55645	2.07846	3.6112	1.43179	3.90844	4.06252	3.88948	1.34301	1.06828
	1.8199	2.56285	3.04908	14.2167	3.4766	2.93675	6.99562	1.34073	14.8796	1.93318	1.04752	5.0272	5.62805	52.5707	3.14594	6.76883	20.6565	1.75779	4.0317	2.38529	8.31641	8.71885	1.14758	4.02527	5.90815	3.12889	7.18006	11.1062	5.99763	2.49265	1.22933	1.67744	35.9733	16.6631	7.07354	1.99563	4.17654	1.68055	2.83259	5.7338	6.73234	1.01038	1.68258	3.65969	7.82454	9.71635	2.99554	5.46507	2.42817
	5.65677	11.1958	11.9932	9.02312	4.09009	7.65144	9.98765	6.29648	10.64	4.5053	3.18342	3.3154	9.71431	2.79033	2.63719	10.7849	4.97816	4.0487	5.88627	3.33689	7.64566	4.92423	2.25787	1.21199	5.33932	1.73107	4.36921	9.44613	1.76555	3.81507	2.8645	2.98819	14.7976	12.2369	4.72829	3.19627	2.00561	5.55577	2.30045	12.5397	2.83945	1.87605	1.23398	4.79443	5.0084	10.5841	1.93634	1.03005	2.19966
	13.4625	8.07296	1.27709	6.63732	3.83362	1.52911	1.531	5.58208	8.18461	2.1787	1.93071	1.17574	10.4103	5.44216	2.45963	3.36208	1.3857	3.28516	1.61662	9.48938	7.14562	3.76851	1.21689	1.48949	7.67087	8.12909	23.1049	8.08926	3.17983	3.94509	1.09317	5.81453	1.49987	10.5801	1.67401	4.98598	3.58341	1.96051	2.84906	1.36186	3.51752	1.40098	5.54392	1.86846	1.00772	2.4837	14.0869	3.33576	1.40475
	2.25931	5.74621	27.0044	4.04904	2.2487	4.04875	1.75313	14.2772	5.2136	1.37608	9.45307	6.01702	7.72159	2.45025	2.86568	7.80607	5.12315	1.40321	3.63108	5.43355	4.79431	3.09461	1.34991	1.15676	2.72411	2.48552	1.76083	4.18705	5.04267	6.53033	1.05128	1.63132	22.253	5.98006	3.32465	1.14719	1.12099	5.3923	8.01437	1.87122	7.43651	3.5957	1.17223	1.2926	2.11251	1.63242	19.1725	10.2849	1.34867
	4.75766	1.61144	12.3153	3.34885	6.36278	1.78552	4.78501	3.05395	2.02803	4.11794	9.39203	2.03908	5.77859	5.31891	5.95223	3.22037	3.8182	3.08462	3.90995	1.57051	10.27	1.4347	2.0147	1.03605	1.45374	2.62475	5.51796	3.07915	1.37572	5.4	5.45735	1.15884	11.2919	7.58895	1.51078	4.0689	4.73631	3.21208	2.66334	10.6097	2.05366	1.2086	4.30207	10.5161	5.78694	5.85243	6.31454	2.32952	1.32414
	4.98067	3.26241	11.7247	7.37125	3.06192	5.54441	1.27784	6.31927	1.04412	6.98347	6.19921	2.28977	1.86459	19.5839	8.41145	4.9684	14.9174	1.36015	1.34154	2.13764	5.3946	4.72446	5.32627	13.6753	4.10947	5.90745	2.77036	1.71056	6.37289	5.84721	1.33144	7.80982	2.56447	3.92641	3.84317	3.43313	2.64224	1.19333	5.91413	6.86651	2.74452	1.33657	8.32817	3.30492	1.34081	1.52891	17.3484	3.64276	1.80781
	2.66431	3.2012	2.62449	7.61672	1.52773	3.30922	4.72931	6.20167	6.63889	3.50689	7.2951	5.72099	6.86388	8.55898	4.34988	10.8627	3.56121	2.39213	3.05769	1.98319	2.30767	2.2218	10.1287	1.09663	4.34095	3.44103	2.80179	8.53008	1.40868	7.02334	1.51538	3.34086	1.87588	4.27606	1.80374	8.59971	1.43617	2.11555	2.71931	43.6825	3.71813	1.14169	4.8225	12.3447	2.79641	44.3177	2.82718	4.3833	1.30521
	2.04008	4.2467	7.47766	4.15454	9.37442	1.19597	8.74667	4.22166	9.88467	13.7026	1.63021	3.14433	6.46267	14.2757	2.42952	3.31521	8.66963	2.10922	1.38802	2.64946	1.1071	1.47209	8.58768	9.77967	2.12337	2.94995	1.64281	2.76208	1.14214	3.63086	3.28148	1.07564	1.02095	8.77953	4.95931	1.56128	1.8137	2.85782	3.53399	1.05249	2.75347	1.8702	2.56813	1.57056	1.44069	48.0796	26.6364	4.89646	2.49547
	6.52899	1.21514	7.3913	2.14566	1.02126	3.37136	1.07013	1.49097	11.1246	3.8985	7.44911	4.79937	2.13065	13.3857	5.82066	7.84468	3.97616	1.18381	1.49386	2.69595	1.35565	7.4595	2.15196	5.45864	6.16952	3.90546	6.67752	3.28491	1.04888	4.49671	1.31115	8.85426	3.70937	20.36	2.19721	3.122	1.75376	1.27728	18.7151	30.3656	6.73259	1.69246	5.20778	1.63336	2.11492	17.0386	9.29505	4.74352	1.32133
	7.59736	5.17012	6.03228	4.12364	3.26765	2.06789	2.29436	5.8323	6.06012	2.77005	2.23544	1.74076	8.91611	16.5763	6.16361	10.4149	5.1314	1.38498	1.74873	1.23583	1.43083	4.19654	8.07761	1.14651	7.71443	2.15579	1.68119	4.0157	6.6392	5.15866	1.39559	1.36908	4.75995	5.16203	3.2853	4.08184	5.80365	5.64093	10.1554	2.82621	1.06214	1.35163	1.21255	1.22174	4.0329	1.62545	12.5495	1.14355	4.13715
	5.09807	1.43585	7.9327	3.46466	12.3215	2.13796	1.58968	2.69442	7.73738	4.96693	6.23537	6.83615	4.59458	8.46664	2.59615	4.66622	5.5546	1.82977	1.47289	8.7678	5.91056	7.96197	1.59868	10.5805	4.01779	3.71094	7.01923	5.62667	3.00924	7.3883	1.6103	6.00352	9.5473	15.9137	2.92455	3.30992	5.24678	1.30821	9.47381	2.44199	2.34459	5.18361	4.06075	2.69724	2.46533	3.2252	1.10162	2.75859	1.91506
	3.85761	1.24592	5.40176	1.79965	14.8649	3.01115	4.95351	10.2083	17.3221	2.64214	2.70919	3.51352	9.20878	3.95074	1.83003	3.65214	1.1352	1.50066	3.44163	1.90651	1.40518	6.70433	6.92885	1.73402	2.89481	6.60561	3.13714	1.53628	9.20122	1.08749	1.70456	1.84609	1.56583	20.8212	8.75924	11.2885	3.89327	1.00375	12.2781	1.75261	1.71129	4.68469	9.23104	3.11778	4.91858	12.4302	30.6226	1.3311	2.64057
	1.43423	4.28203	3.71447	10.4782	2.41891	1.60081	13.3695	4.16778	8.43366	5.64922	2.38428	7.1318	8.53941	7.58366	4.16696	8.29795	2.55922	4.56673	13.5852	5.63846	8.34737	5.58618	6.84988	2.63823	4.0811	4.32717	6.79708	5.73065	2.23003	3.75793	3.44578	3.98064	84.6546	8.57502	2.71574	2.42379	4.59129	1.68939	13.2258	7.63726	2.60123	8.43722	4.23118	6.49781	3.9467	3.74132	1.9359	8.58834	1.59051
	1.69118	9.10586	12.2561	1.47957	4.14037	2.34999	3.60725	3.72587	12.084	5.86715	4.2516	9.70693	5.98445	3.339	6.27663	2.80679	4.21074	1.54341	2.11802	3.74781	1.50336	1.78796	8.80442	2.77453	4.9731	2.34931	2.00343	1.19431	4.53605	4.9454	1.17303	2.00298	27.8236	3.58675	2.34135	3.2576	2.08295	1.2327	12.6515	10.28	1.96973	4.40617	3.88433	1.95036	6.76043	9.13636	61.0867	18.8844	2.16461
	1.98303	5.46709	9.5746	7.51974	1.44747	1.16169	1.09856	4.74645	3.0932	3.66632	6.21941	5.31485	13.0346	6.03494	6.30096	3.94274	3.92193	1.0062	1.88968	1.60224	1.28519	5.56039	3.92874	12.8785	4.04615	2.94141	2.12261	2.44281	2.13722	4.75923	6.47262	3.94176	46.5585	3.29429	4.77153	1.32779	2.94195	2.61682	8.18231	1.45974	2.9592	1.71045	5.33789	3.47509	1.31986	6.52199	13.5	4.72305	4.57455
	3.02829	3.56043	8.02514	3.83056	1.41057	2.26819	5.51474	10.142	18.6241	5.98111	3.93702	5.41696	2.84554	9.96466	7.6575	1.72984	9.97517	1.5805	2.34031	3.87097	5.43499	2.26004	2.32058	9.62021	5.42796	3.43148	5.46551	2.56217	1.90207	1.32833	8.53197	2.79513	13.4217	16.8697	1.76829	4.23544	6.37454	7.01019	8.5834	16.1013	3.89468	1.02334	7.6206	6.93151	5.83205	17.2324	1.13344	4.24114	2.98825
	2.93777	2.49464	15.7829	4.01671	1.46039	1.97852	15.4982	4.97854	3.73978	5.00118	4.43754	1.00925	7.76221	1.87025	2.30744	6.47492	2.6771	5.03195	2.60831	7.25325	1.92616	2.10092	8.03711	3.91926	8.68697	3.56367	2.24487	1.87385	1.48781	8.40092	7.43422	1.2244	7.01374	11.3988	2.7508	4.50156	1.25973	4.00094	11.7558	1.8052	1.29627	1.54107	7.45742	2.25378	5.76559	1.77485	5.02114	1.10113	16.6285
	4.16784	3.93714	3.20961	2.54672	3.88805	1.64446	13.6485	10.7761	1.41769	2.58788	2.11618	10.6156	8.68364	7.23574	3.08305	13.4704	3.75218	5.47266	9.4297	1.9757	1.4845	5.4518	3.41291	1.27569	3.46212	1.54861	3.42197	1.98735	3.60777	4.92619	2.39058	1.36999	8.23607	10.9447	1.95528	5.85017	5.91918	8.01233	6.04651	1.0759	1.29806	1.11283	1.72889	4.53642	4.94073	10.2002	24.005	1.29612	3.6731
	5.98586	4.49224	1.23391	3.15987	4.10301	1.8849	3.28971	1.44849	9.92618	1.44337	6.61146	6.71843	3.04788	1.50668	1.15918	7.21494	5.18504	9.5311	6.96182	3.67091	1.46769	9.38234	2.46055	7.04122	6.9668	1.50941	2.21671	9.89134	3.18252	9.39828	7.60834	1.74391	2.87834	11.2944	1.9436	1.91911	3.93581	5.11595	28.6546	31.9244	1.64656	1.41896	1.88641	1.48569	6.35847	1.07959	4.41797	2.71877	6.22535
	1.01179	1.90351	2.20986	4.9176	5.63812	1.03931	10.0928	13.0369	2.3712	5.81986	2.02509	5.08702	2.17056	23.474	2.54624	6.24056	1.05563	3.07078	4.07666	5.14272	2.42296	3.63345	4.26461	9.06343	8.27111	2.12312	2.03409	9.14371	1.52704	7.88082	3.71417	1.31166	6.98506	5.52814	2.67133	4.6529	2.90424	6.15545	6.13015	40.1596	1.13967	1.25879	2.22759	1.85785	7.164	11.2765	3.01498	4.40339	8.45304
	1.66242	2.54781	3.86283	3.40818	4.12884	3.39832	8.17831	8.83652	7.93732	4.72415	3.90086	4.32389	4.96008	1.24739	4.67282	9.90317	1.12754	5.20767	3.71696	11.1524	1.96861	7.03624	10.4039	6.64034	1.50996	4.17839	3.05133	1.77572	5.44349	4.97938	1.20969	1.15929	1.89818	5.46522	1.06666	1.62261	4.05762	5.54814	37.508	3.28759	4.89131	9.31251	3.70792	7.25402	8.62282	2.76965	9.30522	2.77868	2.28447
	3.53701	2.29212	4.99932	1.30693	5.96332	3.32771	7.64669	12.0076	7.89698	1.97259	8.55297	5.54573	2.40862	3.02036	1.88963	3.56446	6.9515	7.84183	3.70459	12.1675	1.42376	6.17692	5.39355	6.34948	1.14881	2.94995	2.06186	4.0179	1.72812	2.8714	6.25923	1.72627	5.47085	9.49388	1.25911	3.85116	1.23411	5.33566	10.5644	12.3646	1.42267	1.13333	11.5601	2.24699	5.29436	13.247	8.84433	44.4548	3.5294
	1.20934	2.29387	64.4564	11.01	7.66033	3.07392	8.79445	5.60694	13.1117	5.56556	2.4702	7.6732	2.86934	1.62746	7.68101	3.98244	1.76823	5.3727	6.26491	1.89902	6.64352	9.10352	3.57152	9.01799	1.30887	3.89692	6.83815	3.63786	3.82611	18.2824	10.2909	1.01506	10.9971	3.78196	4.76803	5.03211	1.35689	1.07766	17.203	2.14643	3.35248	1.36208	4.21512	1.41821	12.0097	43.4184	5.04014	5.58713	6.85202
	5.63272	14.297	5.19417	2.27674	1.14303	1.43171	2.31707	11.4123	3.11834	1.58583	1.44287	3.10052	4.53507	3.51708	3.75327	2.0596	4.18599	4.82763	3.01525	1.36318	5.76815	9.73405	5.71823	2.5634	8.43067	3.59282	2.79427	2.35787	12.7857	7.20607	2.76042	1.02862	2.22384	2.23027	5.09138	5.12157	5.45802	2.64976	14.3276	16.76	6.00949	1.44154	6.9414	1.89265	4.98826	11.6942	3.71316	4.42721	1.99637
	1.03536	1.82586	10.7952	1.64228	4.86872	40.4254	3.94596	4.02583	1.71701	3.7424	1.14002	2.46959	1.19661	2.51868	3.76502	1.86274	2.92465	5.88601	1.56307	3.9796	10.2744	7.50355	1.77051	9.45985	8.24477	3.90596	4.91938	4.64837	6.16396	4.92915	5.8717	1.28815	3.45636	5.05191	3.75045	4.70467	5.06115	1.92114	15.326	1.06439	1.27451	2.62798	2.61665	5.38302	3.64584	1.87433	2.49753	4.01266	1.35849
	3.50401	4.54891	3.50301	3.9652	1.06969	1.93297	4.16328	5.74371	3.60591	1.1433	7.44113	4.88966	1.51869	2.19262	1.47202	8.01672	2.58751	1.35166	2.48808	5.91365	9.79619	8.52097	1.64748	4.81589	1.10677	7.31432	1.09418	12.9881	4.34708	4.30069	7.7229	4.6896	10.653	1.62819	7.23443	1.43751	7.54436	2.39149	27.8577	3.49717	1.26377	5.43997	1.97462	2.5398	7.29128	9.16646	5.94866	2.95098	4.05794
	11.5592	1.34071	2.36265	1.37443	4.61502	2.33764	5.754	4.23564	6.8055	7.88126	1.68468	3.87355	2.09774	6.61906	1.81023	2.72132	1.28138	2.61594	1.99476	9.77625	5.22536	10.1609	3.01638	2.23557	1.96584	11.6857	4.78767	14.2483	1.09955	3.27231	6.84312	2.80643	1.38516	3.43588	2.69042	11.8725	3.0947	3.98769	7.18719	2.56597	1.24381	2.02117	2.55711	3.91982	7.85918	9.17967	13.7731	1.4312	5.60358
	1.11693	1.29454	2.87636	4.2938	4.14452	1.10785	1.02806	12.9235	3.06397	4.43196	1.33675	8.47366	2.07113	3.61684	4.52909	12.8224	2.9553	11.5033	1.50421	10.1303	4.61564	2.55423	2.21111	5.07646	1.68471	1.07614	12.5011	1.70396	4.19173	2.86302	5.00044	2.68888	20.2468	5.02188	1.00433	5.84961	2.00706	2.76021	13.2699	1.26475	2.3932	4.45803	5.14225	4.0327	9.45654	12.5176	6.67998	2.12039	3.47613
	2.98633	2.01439	8.90532	6.56591	3.0061	8.57044	8.4904	5.07075	8.22612	7.45601	1.01747	3.64839	4.49096	2.72891	5.28695	2.27356	3.02957	4.40296	5.63013	10.875	1.75044	1.47858	1.63613	10.4549	3.25191	1.63858	5.96053	6.53247	7.57421	2.03214	13.6005	1.89628	5.25162	9.27006	1.99541	4.08747	6.19424	1.47008	7.59419	2.12071	4.23935	1.24499	4.03555	2.96756	1.31221	4.86019	4.51651	2.23277	6.72514
	3.72702	1.60655	3.42163	6.08385	8.16035	3.40419	3.46562	2.74312	5.62458	4.56623	6.47342	3.03461	1.35275	1.47205	1.50007	6.38449	6.26896	5.08382	2.71896	2.37427	3.04182	3.53289	9.62156	1.81554	1.42031	1.17264	4.13355	14.1172	3.36813	3.82344	5.10845	13.5719	5.24334	1.70042	2.19682	4.21462	1.52898	3.27233	10.6237	2.89991	7.31318	1.26715	5.75404	3.31171	8.61839	3.11214	43.9035	1.11341	7.4149
	5.1801	2.29597	2.95497	16.1183	5.00249	2.74835	5.54512	2.85398	8.68387	7.04257	2.50636	7.5688	1.10768	2.62792	1.91623	3.87822	3.15511	3.845	1.80455	9.52441	9.98636	5.34048	12.3793	8.23495	1.48717	2.20204	3.82212	21.0143	1.59384	1.53716	5.40825	4.24831	5.19044	1.91351	1.607	5.1182	3.18171	1.57732	1.93296	6.94635	1.57415	4.63242	6.48303	6.8721	1.66101	3.09085	8.00298	1.26933	4.55703
	2.98161	1.23543	3.56833	11.2469	1.22468	2.69893	1.5641	1.77539	6.28578	3.6154	1.76638	4.28769	3.89651	7.042	2.85599	18.2265	8.67199	4.88767	1.37059	1.18516	4.26125	16.2617	6.99849	15.1742	5.83116	2.14524	6.34101	4.59785	1.90386	7.32477	4.09383	1.93878	1.13279	2.58209	2.09164	3.51415	1.25731	4.85648	1.83878	30.5851	3.32306	2.1115	1.01629	1.23065	3.55119	1.66583	9.7228	1.70509	5.00075
	5.78501	21.7659	7.16268	2.54921	2.39262	2.13508	2.50415	4.37863	2.33905	11.4097	1.45085	5.36742	8.92591	1.51986	5.59114	35.9517	3.93136	2.76399	8.57516	2.63492	5.64285	2.38076	1.15639	4.89562	5.07086	1.02487	2.17795	11.6327	8.14202	1.82036	1.34912	1.7109	9.28792	1.14053	4.69712	1.86285	2.34495	6.95878	3.49382	1.47625	2.37043	3.5476	1.19617	1.88374	3.25717	6.58696	9.97733	1.33854	4.08808
	5.1504	2.38726	9.22861	2.89947	1.56002	7.48748	3.99802	10.2881	1.254	3.31139	2.33216	2.6639	4.39924	10.0772	2.18205	6.42143	1.71695	4.68083	17.4474	4.81399	9.22716	1.7422	10.5299	11.8429	1.86352	5.68126	5.46281	13.2678	1.0648	2.601	7.63322	1.69281	7.10551	12.6473	1.31326	4.84251	6.39436	1.56487	5.75014	6.36215	1.17882	2.75009	3.25175	3.94953	2.46654	2.98036	12.2035	2.78873	1.73
	1.83074	5.12605	1.7814	4.17727	3.51904	4.43692	5.31767	3.08504	6.78095	5.0715	10.1715	5.76899	7.80142	8.95224	7.74556	1.78499	3.51937	1.39755	1.52998	5.18678	3.01882	1.52605	1.31433	1.09796	1.96432	8.50606	6.73421	7.90985	3.91264	1.12196	4.80472	3.77808	7.09977	2.29821	1.14263	8.47425	3.57616	1.24635	1.14792	12.7734	1.37763	5.78791	2.70517	2.18249	2.28127	2.27078	2.2134	7.1069	3.95139
	5.42291	1.09691	8.933	2.162	1.70301	6.40353	8.9157	3.90201	2.95231	5.88988	1.47667	5.80176	4.17308	7.6051	6.87096	1.4828	6.07976	1.63457	2.60806	3.18377	8.2318	5.5609	2.2233	10.6309	1.60367	1.56168	1.11713	47.0227	1.70929	1.84695	1.41196	4.44318	3.96461	11.2987	1.20379	4.52238	6.27883	3.58	4.07535	2.62431	4.48294	1.60046	3.7599	1.47041	1.33114	1.42575	3.54613	1.1603	5.74798
	13.4488	3.22778	13.5349	2.02772	2.74918	1.51108	5.8528	6.16075	5.50182	3.6251	2.16829	1.27823	18.1018	6.6339	8.49332	1.12051	2.99302	3.68752	7.31243	6.54445	4.06519	4.82076	3.61778	6.91784	1.2567	12.1672	2.84132	7.72972	6.04807	4.32581	4.89571	2.21278	3.95823	2.8009	2.95026	8.15637	4.23745	3.58523	7.12067	20.3209	5.03256	2.39295	3.17992	1.78826	1.35329	2.8405	4.17139	8.03908	1.27717
	4.23951	6.49614	10.5959	12.5102	2.85296	1.96156	9.03748	7.03886	1.01139	5.76894	1.34427	4.15815	9.18357	82.1506	3.09315	3.54626	4.65339	2.02623	2.73866	1.55531	11.2724	1.54363	5.68807	3.85735	1.22074	4.33672	13.6246	23.9324	2.17869	2.4429	3.83265	1.35823	26.3671	4.33899	1.02108	1.44369	19.8139	3.99452	14.0075	5.72305	1.52502	1.9162	10.1317	1.09528	1.47694	3.95533	3.39059	1.37018	1.16502
	1.53418	3.57687	16.2258	1.05578	3.64035	3.15275	5.80087	2.04218	5.59652	6.52882	1.76215	4.17873	2.02633	2.70665	3.6351	2.78639	3.43155	7.31752	2.63484	10.4546	1.15723	5.56432	1.22078	2.50282	10.0288	2.06281	1.22339	16.1734	2.58063	3.28511	10.7255	3.23235	1.38197	5.28788	1.16834	1.707	6.47025	6.56073	8.40623	13.5472	3.0613	3.89889	1.32187	6.93406	1.19138	6.43976	2.66855	1.43567	6.84501
	11.4927	5.31598	63.9592	4.22239	3.061	3.83185	15.1565	2.39861	3.91634	1.7392	1.34427	5.96825	4.72482	13.4912	4.73407	1.53519	1.26959	3.41121	2.81115	21.3409	3.49203	4.68468	3.07806	3.43642	3.28028	5.44352	3.87168	6.54419	4.01306	3.91702	4.94808	5.66125	2.79199	1.81268	4.52921	2.78555	4.42887	1.11983	1.83813	2.29766	3.10275	2.15374	1.67691	1.70805	3.71471	8.40733	3.03443	8.06662	3.70955
	3.76756	1.15498	10.3369	2.28846	1.98485	1.58801	1.0809	19.6546	7.42345	7.18382	3.17215	6.87311	3.67175	8.81744	3.88464	1.70724	4.81607	8.19546	5.10726	4.46168	14.6698	4.92901	2.31142	4.10055	1.44563	3.90546	1.0909	24.0957	1.21948	4.17953	1.68885	1.47669	1.57794	12.1539	6.68708	3.44551	10.8169	1.25278	1.93955	9.37721	1.557	4.92391	5.88258	3.39446	5.42365	1.97601	4.03839	1.21202	1.86809
	2.54691	2.2358	13.1983	1.04441	2.20949	1.60857	5.6739	2.4556	11.3205	2.7749	1.46728	1.10374	2.85113	26.55	6.85756	2.44946	2.18789	3.58536	3.99608	9.7388	5.76344	2.61245	4.05634	2.14782	2.10817	5.00623	1.42375	15.9369	2.00743	6.8879	5.55423	11.8443	4.27656	6.585	7.30767	1.42907	4.92242	2.06454	11.5589	1.47817	1.31264	2.04793	3.75423	5.23704	2.87253	3.47519	15.4678	1.1882	1.70196
	5.09712	1.3617	16.6421	4.06573	3.34745	2.86325	7.68407	11.546	4.52375	1.67858	2.98528	9.32556	15.5783	21.2146	2.7867	1.91954	2.15724	6.53984	7.48546	12.5777	1.84095	4.67717	4.71419	3.54422	3.10502	3.14749	3.67324	14.867	3.50286	4.19775	7.91731	2.15988	7.1447	4.20242	1.15042	1.41781	4.55359	5.13965	3.08153	3.58545	3.21943	4.02352	1.14136	1.31764	3.58986	3.07213	9.58582	1.11155	1.873
	1.20509	1.52575	10.2511	2.22523	2.60249	3.70379	7.18088	5.3847	2.82486	2.27538	1.44944	1.39291	7.71319	12.783	1.491	2.82443	2.41481	2.61908	15.0924	3.66981	1.03841	1.90321	4.29681	6.28267	6.4005	6.64029	6.60809	4.07062	2.92787	3.93376	1.32162	2.00479	4.00125	20.4965	1.8501	1.78915	5.27917	3.44545	23.5057	2.81508	1.02069	1.20024	3.3009	2.86571	2.31067	2.8416	27.6656	1.11638	2.51229
	3.11457	1.04515	9.9621	1.46039	3.4457	3.82175	3.76551	3.67562	8.49329	10.8829	2.96227	3.50589	23.1361	11.1626	5.22653	1.99232	1.56017	5.68955	1.55069	6.88067	50.0718	6.93124	11.599	1.63069	4.12568	6.69407	6.24054	3.312	1.51157	1.52583	3.39669	3.46972	7.71381	4.40836	7.54103	1.16294	9.88786	5.10471	4.59234	1.68352	1.22871	7.99518	4.50967	6.32255	9.43117	5.29703	12.4174	1.22319	2.20596
	3.45073	1.10286	9.10461	7.41779	1.02725	1.13653	4.95728	1.49719	6.34483	4.40862	1.01278	5.02377	6.15809	2.23177	2.89538	1.41442	4.76538	4.28634	18.9991	9.53543	3.45164	1.11133	3.00282	4.1589	5.17622	5.8994	1.11578	5.96643	7.14941	1.49529	1.65547	1.09554	3.63991	32.7577	8.93455	1.29404	4.25533	1.81511	2.85696	12.9178	2.37145	4.13769	3.04068	2.7019	10.517	7.56634	4.86383	1.55959	1.97534
	10.0698	4.8053	9.70967	1.85223	4.88256	2.61568	4.67725	5.04019	3.97597	5.26458	1.65228	3.49942	3.52051	5.77606	2.44127	4.06681	4.49779	3.49672	12.374	6.89125	10.2078	8.0902	5.6191	1.71977	9.39206	6.81068	3.77622	5.57395	2.46765	2.80835	3.1355	7.88487	10.913	13.3688	5.07735	1.23496	2.34495	1.83599	5.70338	2.75904	1.2236	3.45267	1.35747	2.15236	1.57039	1.11337	7.28536	2.0013	7.79833
	4.9736	8.24505	3.18747	1.71865	1.66888	3.06995	9.6074	4.40919	1.36215	3.97427	2.39883	5.40019	3.45609	2.53063	1.95026	1.41166	3.61603	4.39227	2.81898	3.71388	5.78319	1.01862	1.94454	7.87816	2.72006	3.25907	4.78574	20.7778	1.9422	6.34219	2.33886	8.39127	4.95496	5.21566	2.83027	1.38912	5.93852	1.79422	2.42163	1.4916	11.1818	1.74139	4.7828	1.92405	3.87501	1.06381	13.3494	1.0814	1.37251
	2.10655	80.2339	1.46309	1.80746	1.4304	8.98656	2.54478	6.64513	4.47815	3.96639	1.23768	3.35236	5.08542	1.03056	1.04267	1.20488	1.50241	6.30031	8.67367	1.28981	5.36335	13.9888	2.04165	2.19682	9.89453	5.75414	12.7767	3.68253	4.14062	3.86629	12.1571	9.95794	8.46773	5.79128	4.7318	3.65875	7.53711	6.49566	3.1823	2.66731	2.73761	4.68929	3.22466	3.38216	9.15367	2.9899	10.615	8.44136	1.44681
	1.08157	7.30484	18.0437	1.04228	3.46599	4.48895	10.2821	4.17089	1.98419	1.97198	1.85183	1.2508	4.13947	1.60396	1.07381	4.13353	4.97344	3.11574	9.64566	1.26095	20.1234	1.78335	6.34388	7.29422	7.32289	4.55687	3.55387	3.09086	9.00777	1.63862	4.97884	2.56002	12.7624	9.73557	4.0364	1.26984	1.93068	3.14581	4.78992	2.44583	4.12957	8.84956	3.58379	1.45768	4.27818	2.48443	2.62922	1.47326	4.07967
	2.60302	2.41734	4.41751	1.33144	2.64308	11.4254	2.58503	2.79855	7.50178	21.3657	1.79126	8.06104	3.64584	6.37832	2.99066	1.88259	9.65748	1.6704	3.74273	9.197	11.4997	4.88376	3.06806	1.89794	12.255	6.34022	1.26427	9.92283	4.76358	7.72666	4.45975	3.2631	12.0181	6.18458	3.85603	1.58154	6.67086	1.42871	3.00975	2.86383	4.44737	6.52185	7.64833	1.88077	1.45399	1.64747	1.71982	8.92289	1.30661
	2.41678	2.32955	13.3561	1.41705	4.60395	1.36083	7.4883	1.45989	10.0922	3.48779	1.85371	1.41196	5.97044	2.2025	1.97356	10.0041	1.77648	3.42505	4.6056	11.7599	3.51561	2.44973	6.57756	8.70086	14.9851	4.391	2.23735	7.21201	6.93869	3.94755	3.7338	2.25618	1.35106	6.68654	5.02125	1.9028	4.24083	5.73853	3.23565	3.38892	1.93493	1.1672	3.345	7.8528	37.1467	4.76329	4.4056	1.97526	1.80781
	2.5752	1.79473	5.17147	5.24975	1.82248	1.78714	3.99153	2.27635	1.33058	5.912	1.76121	1.10145	1.9297	6.33834	2.22392	4.77099	1.90379	2.65051	4.23403	7.86555	3.08545	5.17316	1.628	2.383	16.4748	6.43873	1.74714	7.38775	5.79184	1.17565	1.35632	2.017	8.13091	3.56459	10.5719	1.61023	3.69169	3.10203	4.37238	1.6793	6.34801	1.12622	2.67745	2.10822	1.62315	2.83646	7.55933	1.35938	1.72299
	3.98868	2.20852	4.91185	1.41528	1.18224	1.08522	1.18528	2.62137	1.18735	7.64454	4.40326	5.00891	8.5065	3.41485	5.66517	2.08441	21.8353	2.28336	10.4603	4.23253	2.97872	6.49466	4.27647	1.53715	11.6279	4.91374	2.91422	15.8688	2.73082	2.1927	2.76762	1.50653	11.464	6.75233	2.93429	1.75145	6.37792	1.11742	3.80402	2.08425	8.55673	7.54143	4.83226	7.32871	5.71445	2.03512	3.35789	1.73449	2.71137
	7.31825	2.49849	2.7662	4.05259	7.51042	5.18483	1.12167	1.07342	2.07421	1.05601	3.31536	10.3474	1.28203	3.00098	1.23652	2.85145	7.4189	3.38104	5.88147	2.04091	7.03742	15.5572	1.52429	3.78697	7.7428	11.1806	2.35652	3.68253	5.54615	8.03548	2.99084	7.47976	1.83159	5.30933	8.69223	1.98156	2.95548	2.12077	3.53991	4.59802	1.07775	1.66068	1.65297	2.63995	4.43204	3.71526	2.85325	2.0761	6.84781
	2.45214	1.05214	14.7992	2.09522	16.2137	4.43782	1.54139	1.34954	7.22292	1.78254	7.35896	2.7923	3.14941	2.90246	4.73943	3.85782	3.54707	4.10119	2.62726	1.82235	3.45488	8.63366	9.10996	2.38968	3.90888	7.14694	3.94785	1.67834	4.59119	5.10596	1.07877	2.102	11.5621	5.82633	2.45277	2.24487	4.88036	3.90254	4.07205	1.08895	1.27656	1.51389	1.07142	2.11883	6.94691	35.5991	3.06712	1.51531	2.18143
	3.71947	10.818	4.4009	28.4043	2.15921	3.34295	1.20008	1.36975	11.8139	3.05587	1.91757	6.20142	2.60187	14.5877	3.04139	2.62647	2.12188	5.2281	1.20287	3.22915	3.76888	3.69748	8.82323	3.07519	5.90815	1.17365	1.24614	7.06483	2.035	2.67488	2.27144	2.27336	2.15915	31.3161	5.13773	2.25894	5.41403	2.58509	1.54703	6.94482	3.23298	4.41872	5.82209	1.39615	2.1407	31.2704	1.95092	3.1977	2.48635
	1.70344	4.68078	10.1592	6.84265	7.11373	1.87534	2.70641	2.19812	12.8148	1.46762	5.99403	1.32243	1.33035	6.57165	5.45874	4.99101	1.60025	6.10574	3.04783	2.67833	13.9929	9.10575	3.69591	2.15094	14.3307	7.84862	1.44862	11.2592	5.31929	4.86512	4.00415	3.1365	2.83245	20.1311	2.3994	6.96304	2.54218	2.33566	1.43441	2.02437	5.78406	4.52243	12.8388	1.43731	23.0346	7.89048	3.48117	1.34896	6.65084
	4.52522	21.6008	8.5754	8.09594	2.29021	1.17748	1.39053	1.3226	11.1562	5.41583	6.67814	7.70406	2.85254	5.67384	8.77708	2.53107	1.17646	1.86058	2.53708	1.42531	6.80273	5.12638	8.51177	5.25686	13.5182	4.99316	3.54924	7.53128	8.81902	2.67636	2.73489	4.36135	10.5925	16.9112	2.14189	1.91855	5.68473	1.12626	2.745	7.42231	3.22761	6.25128	1.66525	12.8976	11.1393	3.49501	3.16478	3.0775	2.02301
	5.76992	6.51328	5.35028	9.74923	2.25654	1.033	1.61006	3.34562	2.82837	2.15778	4.75494	5.82424	4.32292	1.0759	2.54954	4.51843	4.15652	8.35232	4.39999	10.708	12.9551	1.97201	1.68883	1.82133	3.2894	1.75821	1.81772	2.14039	2.08432	1.87059	2.69038	7.78088	13.8653	2.75585	4.61142	2.71129	2.19462	2.0561	7.65281	2.3372	1.35307	5.57881	1.57327	3.02102	21.6007	4.98097	17.8416	1.16997	3.40323
	4.20934	6.27508	3.97465	6.29451	4.8475	1.96823	2.37394	2.4758	2.63369	3.62025	1.53537	1.4592	15.3711	6.43273	1.531	3.85065	2.92288	2.15983	1.86492	2.18435	1.17197	2.88716	1.27823	4.63015	5.52218	1.34756	2.51967	7.57667	3.87722	13.9777	1.518	1.53276	9.44438	9.32512	2.579	8.46581	6.47315	1.75124	7.24843	2.45773	1.85945	8.53466	7.26084	2.7749	9.96161	11.3936	1.66812	3.98214	3.99134
	3.63743	9.98171	1.58765	2.46963	4.39084	3.62055	16.6916	2.338	10.8212	4.86388	3.91495	1.13383	7.51923	10.7236	3.09294	1.82359	2.48377	1.66129	13.686	8.19649	4.11059	4.95273	2.28889	1.30553	10.1493	5.02935	1.76199	2.05545	2.32754	4.33664	1.75038	1.0675	5.5948	5.48095	4.38507	6.76331	2.45807	2.21395	2.38541	2.34795	2.12095	4.55003	2.13056	1.04181	40.4015	30.8758	1.35173	6.06346	1.91646
	1.31872	2.40055	15.4862	6.3137	2.58081	2.11091	1.35782	1.12937	8.33076	7.21564	4.04407	15.796	5.26536	7.26089	17.2312	7.81876	8.88476	26.8342	4.54978	8.91212	2.32861	5.73779	2.21805	1.92556	2.02308	3.49682	7.18488	3.06963	4.11708	5.95162	5.06655	1.27594	9.19902	14.1003	6.13037	1.76439	8.08479	2.41398	10.4274	1.20142	1.34642	1.02083	3.15063	2.73119	2.82903	25.2525	1.86873	1.25184	1.85408
	4.09524	5.02531	6.41978	1.254	6.48179	3.48076	1.94046	2.72291	12.8317	12.0062	10.5048	1.00773	2.6978	4.13212	2.89126	2.55975	3.46632	3.44076	2.66161	8.69575	1.84213	1.31246	2.42513	8.72936	4.02235	5.47116	1.10305	1.44987	4.51027	3.33141	2.00567	1.26373	4.49962	4.00506	2.73755	2.59314	2.88587	5.55377	13.8284	7.23615	9.19719	5.42324	2.31516	1.14747	4.67692	1.61957	2.89965	2.04596	1.24212
	1.98538	1.10146	6.96782	10.3922	2.3368	1.01938	20.5864	2.56076	1.17917	14.778	1.70768	2.62619	1.09368	6.99501	1.09732	5.98469	1.61204	4.30646	6.81835	1.87368	11.8978	2.59145	1.31077	4.21279	7.45357	5.05096	4.43284	1.1372	1.74336	6.05012	1.79293	1.55672	1.16402	9.49173	3.20543	1.35086	6.01103	1.9107	12.8142	6.5414	2.45026	10.7315	6.61786	5.00788	20.3046	9.96046	2.71803	1.21016	4.81359
	6.47949	1.79018	5.18809	2.14672	3.89866	1.13861	3.26024	2.05306	15.1637	2.33782	1.94339	2.46807	1.61672	15.7881	1.70733	7.44875	5.05832	2.08407	4.40605	4.97571	3.68809	7.5155	2.36684	3.69878	1.63558	5.12032	1.21548	4.79336	1.47884	6.46926	1.13965	2.28602	4.36037	3.29286	4.60051	5.14745	1.89056	4.77012	5.74026	1.50043	4.08607	1.59502	1.60288	1.55443	2.64698	7.25065	5.50191	1.50637	2.07278
	4.19707	1.17946	2.94556	1.20782	2.55821	2.46525	5.58017	3.02857	9.17553	2.30448	1.24332	4.81765	3.31886	16.5396	3.0185	1.8484	16.5777	1.82789	1.30037	3.87626	10.0556	1.24808	1.88964	2.23423	2.47591	7.26104	2.28459	11.927	5.96916	3.14671	1.04146	1.59108	4.35941	9.46385	1.12198	5.16827	5.7089	1.95368	9.63187	1.53881	17.0728	3.80354	1.96012	1.17972	3.12869	2.33539	1.60802	1.33706	1.54425
	5.30504	1.07208	5.39457	1.16768	4.44712	8.33641	1.39637	1.79973	14.0126	4.70536	3.81118	3.95547	2.05573	13.7188	5.26798	4.40153	1.52539	3.89498	2.36431	1.51323	12.5152	5.56893	5.73247	3.21817	10.5358	5.32037	1.48642	1.76181	7.76318	3.5629	4.29806	1.25152	1.19365	4.61358	2.33473	5.30555	2.99609	3.07793	3.58075	1.54457	1.36407	2.52134	1.04937	7.62619	15.5343	5.60575	6.30968	1.19714	1.16362
	1.05328	2.62721	19.5644	1.98331	6.07541	1.28697	3.4612	5.57845	14.5522	27.3565	2.03401	6.66775	9.33411	9.92096	1.5706	2.69485	1.12047	1.89767	2.5823	7.51082	5.1263	5.99936	3.47374	5.13125	17.0077	6.06125	4.34414	3.96298	3.16795	3.69932	9.3764	9.6324	18.146	3.75407	1.67635	2.13741	5.41839	1.0166	17.7411	1.33423	1.7356	1.17807	2.80882	1.83409	2.78513	6.446	2.09763	6.84492	3.40673
	2.1966	3.80947	4.01894	1.21421	2.23855	2.19569	3.46445	1.52775	10.723	1.14603	1.57622	6.68795	7.33789	9.0656	10.9818	3.16412	5.7715	1.30105	3.47977	9.80776	7.70817	2.00633	3.40816	2.75404	2.17959	1.98239	2.79755	50.7243	1.10336	1.46377	2.47698	1.54768	8.97055	15.4947	1.74803	2.86488	8.43284	3.8455	12.7654	17.9898	5.44938	1.63517	1.14419	1.54255	3.19917	12.892	1.75031	7.80018	1.19376
	1.62565	2.44533	4.08371	2.56377	21.9796	3.68728	5.53447	1.13766	12.1629	8.20588	3.606	5.50534	4.241	11.7187	2.04842	3.14923	1.09984	1.87598	3.73717	3.19302	16.6337	1.66964	6.09443	6.93387	11.4779	2.92332	5.84522	9.95651	4.21549	4.17263	1.12394	1.91301	12.8631	4.89817	1.94671	1.5489	2.57022	2.8297	9.9941	10.2439	11.52	1.37714	1.89932	5.2468	4.21334	5.28345	2.02737	1.02261	1.91927
	2.01132	5.71543	2.13181	1.5794	9.12072	2.76016	9.30102	1.01954	39.8158	2.62911	1.62176	7.94065	1.84147	8.1752	3.5157	10.6355	6.26955	11.9622	5.13555	9.84962	6.31773	5.09718	8.77274	2.00573	6.99668	1.95122	2.98403	27.3762	5.16395	4.69865	1.28235	1.53004	27.2854	3.49951	5.62821	5.10638	1.79001	1.31584	6.30994	6.11189	5.11521	5.14806	1.47246	5.18017	1.03068	1.6739	1.34598	15.3454	1.79449
	1.41018	10.3819	11.7872	3.589	2.01945	3.03559	2.20802	6.55395	3.21772	2.71701	3.3332	4.14406	3.41689	2.72767	7.13039	5.11784	2.88457	2.67283	1.45445	1.75757	9.59482	4.13969	3.93891	3.88006	2.83555	5.82803	4.47296	7.77512	3.21884	3.85397	1.73336	1.29583	8.22237	9.82066	1.17029	3.26603	8.43236	1.15317	15.8101	32.274	1.23409	1.97015	5.52313	3.4369	1.02464	10.213	1.97965	7.82139	1.25614
	1.529	11.6603	3.72278	6.89771	4.79537	1.05473	1.15257	2.63899	2.56003	4.52046	2.77493	5.84252	17.786	4.17499	4.68767	5.95216	9.4229	1.07504	13.0534	19.0103	1.73982	1.34882	5.08615	4.83683	6.10823	4.63629	3.82674	14.3003	5.14064	6.40474	5.66878	8.83799	6.69573	7.45524	2.07216	3.19796	2.57118	1.95569	12.0943	12.5646	2.73224	6.29561	2.80882	1.79165	7.57281	2.71936	2.06051	2.02549	1.83935
	3.05422	1.5156	1.4487	6.74034	2.76625	2.55301	2.85947	1.92459	6.23784	1.5246	2.38522	2.78277	14.7332	6.53991	2.0744	6.51793	13.0796	5.07564	8.9005	6.60284	5.11333	3.45042	3.11839	7.69643	2.70031	2.39404	1.91742	10.8953	5.94002	3.00832	6.30636	4.42917	9.60561	3.40942	2.44888	1.77114	1.57974	10.205	4.39872	5.81556	7.35744	1.34954	5.07767	2.62382	14.4363	5.34878	4.22884	2.56954	1.70126
	1.26733	5.85569	1.1625	3.64975	3.08268	1.35478	1.22877	1.69819	15.8033	1.4364	2.17581	5.08016	9.79623	3.72031	1.60339	4.08942	1.4747	2.66937	7.47813	15.1483	3.54981	5.05655	5.46049	2.92597	2.42273	4.12964	8.89924	12.0434	21.4576	2.03805	1.64368	1.03133	18.6848	8.69157	2.49913	8.30715	6.89419	1.46004	27.963	2.66231	2.59458	4.84445	6.06215	6.191	16.9174	1.13429	2.50549	4.88306	1.68514
	6.59783	1.69609	2.94335	54.662	1.83448	4.45432	2.40886	1.79248	8.03787	4.34497	2.52842	3.80231	7.98486	5.62643	1.89746	9.41791	4.29444	1.16243	2.7523	12.2752	78.7192	9.42076	1.26349	1.14161	3.15061	4.93385	7.62668	4.08893	4.37218	6.35647	10.0513	4.20536	7.65294	6.97685	6.6154	2.25444	2.46097	3.1438	18.617	1.62748	2.10867	5.35507	1.06197	1.29515	4.04699	12.4941	1.4591	4.7517	1.18885
	6.65347	4.3303	6.83053	11.1126	1.1458	3.72579	1.0156	1.81579	4.98735	7.74213	6.29547	6.43382	9.46364	8.03628	4.22779	10.448	2.22974	10.3858	3.62224	1.2193	1.91259	2.38537	5.6984	1.46321	7.90084	3.15402	5.36774	15.3525	3.43516	5.10645	9.47132	2.32943	6.43858	6.33544	2.46368	1.74751	2.2241	1.46446	10.029	11.6603	4.47398	2.36368	1.8338	2.03142	2.04082	11.8488	2.20191	6.6049	1.27507
	2.7091	3.62898	1.26824	6.9272	1.30448	4.96415	1.49335	3.64609	7.15452	5.44341	10.7494	2.20176	11.3569	3.96187	9.10457	9.28336	2.39772	1.35732	1.30719	6.89257	1.65727	2.51769	1.12657	1.38704	7.34872	4.43222	2.93717	4.00618	4.94068	3.51019	7.73271	1.59967	16.5295	11.1078	1.25872	2.97685	3.48528	2.95542	6.9165	3.42616	1.03783	1.49298	4.33703	8.45327	3.32483	2.63053	1.14006	3.9881	1.69005
	2.8529	1.19415	1.40164	1.97159	6.8854	1.52109	2.43457	2.15305	9.26264	6.95316	2.68478	4.33913	18.4939	7.83347	2.87785	3.4266	1.3356	1.24384	3.73338	6.43936	4.76572	1.22043	2.00419	4.89384	10.0779	2.1764	2.45448	10.6961	1.4367	4.07216	14.3565	1.19003	6.88851	4.28393	1.21743	1.93599	1.61648	1.83198	3.63146	1.82746	4.54409	1.19355	1.21791	4.93404	4.75345	3.52217	1.83736	2.50628	1.32975
	9.1669	95.2483	2.68206	5.22559	1.459	1.08711	10.5545	1.43968	3.93855	3.80393	8.99246	3.32188	6.79105	9.54625	3.04386	6.30949	1.34975	3.183	1.51331	5.25486	7.30778	1.23716	9.00489	2.6075	6.86954	2.83737	3.31436	1.81307	1.00114	2.99009	17.6721	2.66537	7.98689	4.21529	3.48437	3.93893	1.7731	3.19562	18.2265	1.44094	1.25635	2.38333	12.4875	7.27142	11.1288	1.44998	2.05344	2.10624	3.19504
	12.5153	1.08502	2.87083	2.32754	1.38843	2.35541	6.55877	2.25563	4.07477	14.7926	14.5658	2.35301	6.5677	1.64023	4.36555	4.5813	1.88375	2.37609	4.39165	22.1407	3.29832	1.43214	9.84422	3.58208	6.98756	2.98011	8.71469	8.14857	9.77846	11.0778	8.5647	3.91915	8.81696	3.04902	3.1618	2.24093	4.45788	21.2197	7.22078	1.05172	3.18411	5.87406	3.96372	2.46936	5.7225	13.28	1.20767	2.76491	3.64296
	4.07685	2.08085	4.34444	4.9581	4.00292	1.99764	2.20348	2.6939	2.14203	3.28684	4.59483	5.36705	2.86934	2.70254	4.28368	1.41718	4.51959	3.16572	1.86113	3.82779	2.00488	2.75057	4.9272	6.62208	5.71668	3.09321	4.95525	8.28184	6.5325	13.3192	6.58652	9.07536	3.86742	4.53492	1.11925	2.16385	8.14522	1.89704	1.21181	24.3927	1.38224	1.34452	1.97556	2.63019	1.23488	10.1822	1.20855	1.87218	4.17149
	8.2942	3.50866	3.10886	8.16912	2.09371	6.78321	9.89664	1.27183	2.58692	1.01448	2.2838	3.56038	8.27754	25.268	2.49757	4.77816	1.73935	3.25247	2.38098	5.26412	1.65049	1.95511	3.58559	3.76336	7.17093	2.47044	1.12234	7.33576	4.46118	5.62459	8.621	4.18275	7.79092	2.08226	5.46108	1.66087	2.67366	6.23579	12.3914	8.84905	1.91881	4.63033	3.8689	4.45621	1.00571	2.35595	1.20104	1.13946	7.778
	4.00047	1.41906	22.898	12.0963	2.37001	2.03263	6.50606	7.71544	2.87104	9.23825	1.42174	2.23719	9.42303	2.75736	1.94221	19.3167	2.4602	5.1602	3.19459	4.70074	1.58916	1.43658	2.87725	2.23067	4.06084	3.08416	15.8095	3.14798	3.32061	5.03208	8.26163	1.66885	9.39563	13.2916	5.21916	3.54341	6.08499	5.83011	2.47037	1.36033	1.99532	4.2506	3.41021	2.64462	4.4127	4.75888	2.58591	1.06094	2.35387
	3.57567	15.2624	14.6431	1.5556	10.8749	2.88543	8.76459	7.07253	19.5145	1.01206	1.98283	3.51771	17.2854	1.86902	2.08533	4.78092	3.11739	2.16329	7.18057	6.52837	15.5145	7.32633	9.08624	3.95089	3.28484	4.15074	1.15435	2.1814	10.1459	2.93493	4.6031	1.53004	12.0582	1.8942	4.5822	1.02173	3.62112	4.66609	9.56996	3.03809	25.5832	2.18719	4.84581	4.00724	5.74586	1.19486	1.04108	1.45577	1.65149
	4.52947	3.39708	9.6045	1.43091	7.8264	1.32196	1.11245	4.38536	4.95227	5.70105	1.04189	3.04375	6.92829	5.05179	3.81163	5.82754	1.06212	1.63174	4.1969	1.89065	2.4946	12.4857	10.3812	2.66674	9.32266	1.92307	4.46813	6.74483	4.10475	2.26363	5.19158	6.26712	4.70036	1.79838	4.7205	3.7212	1.17272	3.54185	55.6001	13.0087	2.09408	7.17969	7.01574	3.03206	2.32154	4.89654	2.55852	5.1923	3.11092
	4.46205	1.2043	5.92101	4.60499	1.83355	3.63858	35.3847	2.64313	4.62781	1.09905	1.17711	4.8188	1.21271	1.99392	4.9139	5.82533	1.44582	2.01492	5.56269	3.17892	3.28063	2.78814	3.4773	2.34603	9.01621	1.32444	1.54909	11.0117	11.1443	2.90045	19.8839	1.49025	3.08451	6.00366	3.36477	1.18601	3.07005	9.34263	22.8794	1.38988	1.56263	3.92064	1.48474	5.53239	1.74478	8.58463	2.68048	4.5288	2.32513
	2.59406	1.10531	6.35667	6.94567	1.2136	1.00297	1.31601	17.4057	11.2801	2.02078	6.1147	4.77727	5.08611	1.2342	16.0025	4.25264	2.449	3.61051	2.35193	5.55032	1.03222	1.74971	3.46019	1.0267	5.5936	1.37671	1.1746	10.196	1.73776	3.11815	5.4076	1.16291	1.75829	2.98609	10.2268	1.5354	1.00498	6.82904	7.39794	7.22118	6.02356	3.02276	4.05256	6.65228	3.2334	7.52926	3.35524	1.1763	4.00466
	4.29703	1.77059	7.95263	6.41423	2.08403	1.90411	1.43104	1.53656	7.47547	16.8716	5.57615	4.42599	3.82649	2.90947	1.05752	1.93828	1.38393	1.16652	5.88525	7.63619	2.67268	3.12005	2.79116	1.15052	10.1017	3.54005	1.44033	1.18479	3.2899	10.0523	6.05368	1.45544	3.93529	7.42377	4.00874	10.6617	5.88244	7.22789	3.80138	2.3633	1.03655	5.56794	1.04496	2.14684	1.25542	2.9352	2.85944	5.10374	1.46363
	4.471	1.12805	1.5655	8.72897	2.33495	3.57401	8.68968	1.40497	4.90609	3.56993	3.13694	8.37994	2.39182	1.50049	1.73744	8.74792	2.42896	1.34757	2.71592	6.90359	1.7298	3.38503	5.07768	3.1812	19.9517	5.20678	1.05388	1.39422	1.63217	5.30986	13.5324	1.27775	6.28914	10.9512	4.78322	1.1967	1.20656	1.305	12.9834	9.11006	6.10877	2.80781	6.34788	8.17871	3.96161	7.36848	2.88153	3.58397	1.92698
	6.0066	1.10531	2.27408	5.82275	9.88366	1.16296	4.81954	1.17496	7.9455	7.22595	2.17721	6.25628	6.74834	11.3114	1.12062	8.92989	4.16359	1.45791	8.82093	4.80759	2.62197	8.82147	1.90743	1.74739	5.68528	2.24828	3.933	15.4235	1.12376	1.56277	6.60027	1.44549	2.12155	4.97897	2.7882	1.59391	1.19689	1.85166	18.3226	9.79637	2.22893	1.05178	1.04118	1.54552	1.077	17.9992	1.92618	6.08802	2.12956
	1.76332	1.33547	2.9987	3.94921	5.59153	1.86272	11.484	1.17444	2.05141	6.03446	2.10773	1.30185	1.68603	9.52358	1.75249	2.45277	10.5369	2.00957	6.40838	2.57103	2.63229	5.35551	1.35483	1.13939	22.967	3.49883	2.80314	8.96211	1.23696	5.67335	6.38949	2.38368	8.45307	9.08344	3.37802	2.03614	4.97076	3.99853	9.18205	21.3081	2.02397	2.1964	2.73037	3.94868	1.30939	10.5427	1.3884	1.02856	4.14696
	1.27628	2.07735	1.18188	3.65507	11.732	3.36099	11.1516	2.01991	8.98436	9.81717	3.31254	3.5558	1.34225	5.96939	10.4149	11.6027	5.39428	6.72593	3.34565	13.1583	1.42641	1.17433	3.03095	5.07379	2.82846	7.69481	2.60047	9.59697	14.3634	1.0338	5.55423	1.30849	1.82967	6.98902	7.32326	1.96243	2.25456	7.06803	7.67651	1.7388	1.72127	1.05972	5.87439	2.65862	12.4431	7.25212	2.25273	7.44591	4.0334
	2.47808	1.86434	14.4333	1.82771	5.979	1.73997	4.07695	1.51843	7.51932	5.97323	1.0278	8.32965	8.5156	9.73051	1.35716	5.74482	1.87197	8.85464	5.66297	5.52543	1.58268	11.3465	25.2308	1.95941	13.2554	2.8439	1.08628	3.50605	1.16187	2.83446	4.08335	5.38635	13.8446	7.15991	5.7669	1.23721	1.85769	1.22707	44.9033	6.51338	5.62926	1.28304	2.72817	3.65799	10.0692	3.90725	3.17804	2.02512	7.20741
	1.04008	1.34036	5.8031	1.28668	1.37551	3.2708	6.7992	1.00762	6.08467	3.12559	3.59802	3.45865	9.39922	3.13701	2.35054	7.94448	9.69108	2.32266	8.10457	6.91263	2.37696	6.51396	7.54398	3.85601	3.75895	2.01254	3.98082	1.2734	1.05427	2.45916	5.45015	2.8833	11.3534	8.66941	4.52688	2.04683	3.06908	6.61013	5.43336	8.52662	5.25312	2.7869	10.4115	7.20692	2.08391	2.18121	1.03622	4.34385	6.22394
	8.36822	4.4083	2.64885	4.44406	10.4496	3.38507	1.11596	1.70804	13.8975	5.59405	1.49874	2.6018	1.31074	3.45772	6.29456	5.1796	4.34631	1.41642	4.39215	8.84602	5.04463	5.35329	5.92344	2.03825	5.28411	5.21532	1.57416	5.9042	2.73912	5.80091	6.67424	1.96726	11.5541	2.07797	5.8717	1.25353	3.7352	2.93092	6.02609	8.54812	1.83156	3.42633	4.09446	4.0866	1.50151	5.30143	1.73131	4.31929	2.40574
	2.82508	1.01577	11.3942	2.68597	6.74057	2.82311	9.41513	1.6438	9.3287	4.88873	2.4965	1.94459	1.03627	4.41655	4.59095	1.47398	2.37355	1.11936	2.99908	12.4638	3.52564	2.16546	2.50867	1.04808	7.35682	2.07185	1.17633	22.9504	1.44185	6.35598	1.85512	1.03088	8.88993	5.64326	4.09912	6.89834	6.24257	4.40421	20.4314	1.50657	1.83719	3.57897	7.39819	1.7628	30.1909	1.07776	3.8581	2.57624	2.35878
	9.52145	1.61074	7.85242	3.95525	4.53245	3.62028	3.6362	1.46714	4.01455	1.10784	1.4701	5.6966	19.736	9.50668	4.93658	13.8426	5.17914	2.0058	2.99428	6.46536	7.39948	3.79975	3.13161	3.45113	3.5999	5.41035	3.05904	3.90513	1.55506	5.04637	5.08619	1.1204	1.01489	3.6411	5.35356	2.41422	3.54958	1.91512	10.8391	3.23654	1.13353	1.32695	4.85526	5.27311	1.13741	3.62312	1.03622	1.43232	2.67071
	7.50212	1.21129	5.89776	1.45258	5.2096	1.7894	3.77421	1.94738	5.2399	1.8562	3.94312	1.08621	2.01022	1.62498	2.7205	10.7038	5.12846	2.66466	1.65097	2.5783	8.65488	1.30528	5.01463	2.92107	2.52606	2.46139	3.17359	14.3991	1.97044	2.96645	14.0711	2.58172	7.09723	5.71406	4.01926	2.56557	3.57665	4.0375	5.16861	1.46704	1.66473	2.54768	3.5819	3.37834	1.10479	3.29275	5.30969	7.20291	6.93053
	1.68553	3.74371	2.68538	11.0608	1.87968	4.37829	5.63989	1.98105	3.64917	5.94443	1.85465	13.1023	6.40245	2.17777	1.21507	4.32984	5.08779	2.97963	1.02276	1.35084	1.59181	3.19347	5.1824	1.09663	1.42436	2.22265	1.65265	2.497	3.60441	3.6875	4.36352	1.40796	10.9356	3.03258	8.29798	1.62711	1.23508	1.10296	7.62383	3.55512	2.97941	2.5159	1.97682	4.04246	3.09727	9.33642	2.0393	14.9142	5.86855
	2.66289	1.43061	8.83723	2.56519	5.61275	4.91067	7.50713	2.40379	10.533	3.6939	1.85512	5.99683	5.09312	5.69815	2.505	6.13689	4.15298	2.48203	2.5487	1.00536	8.30786	1.1354	2.04012	2.71217	4.65399	1.04749	1.01801	3.62907	7.16958	3.47867	11.985	1.14166	1.80227	6.10305	8.59717	1.66706	4.60193	3.15103	1.21641	8.75654	2.06875	1.34368	5.69198	8.53517	1.95905	4.16824	9.89425	1.82268	11.9972
	3.44177	1.93289	11.3028	1.07105	1.8008	2.44442	1.39962	3.11042	2.50858	3.32078	1.01747	10.0887	1.08038	2.35956	6.8955	10.9928	2.10242	1.75716	2.47772	14.057	1.72006	3.14788	6.11205	4.70677	2.09652	1.07815	4.31405	13.3747	3.36208	2.29071	5.90378	1.61866	12.4591	7.99796	3.72201	2.7051	1.27713	8.12721	10.3827	5.91843	1.34411	1.32361	3.27002	1.33249	5.98913	3.13123	3.34154	10.9499	1.23301
	1.36257	10.4036	5.25562	4.91334	1.35245	8.73278	3.22843	1.00348	11.141	6.40151	1.6828	1.25918	7.09423	9.61221	7.86289	2.12191	1.56665	1.72855	2.62953	5.36062	3.36702	1.52144	2.24364	2.60527	2.18061	2.2724	1.89351	22.4693	1.62298	1.40615	6.1414	1.14618	1.94502	6.96184	5.81949	3.33918	2.09891	2.54693	20.3247	10.6926	1.94107	1.10447	2.90049	4.81395	3.10774	9.86356	43.8509	1.44758	8.12849
	1.93022	5.03056	26.241	1.89876	3.62236	3.39742	1.54021	1.09155	6.66052	7.37538	1.56495	1.0283	5.34028	25.6242	5.23478	1.02566	1.52362	3.18363	1.12204	6.08683	3.52534	7.005	4.55168	3.3901	1.66141	8.12255	1.00914	2.24437	2.59094	4.92471	6.15973	1.15341	1.36253	12.7224	1.4726	3.82753	2.82013	3.81417	3.44969	1.88734	1.76349	1.0844	25.4498	9.52733	9.52824	4.52358	5.53594	3.45186	10.4151
	1.31966	1.9133	7.23574	7.60357	3.21921	3.48571	5.7527	1.70182	9.88467	4.47621	6.8899	1.04163	7.85533	2.38594	6.50636	7.96489	3.77281	1.24227	2.75305	1.49427	2.01992	3.86514	2.4863	2.79992	7.56146	5.14345	28.9183	1.10424	6.82078	1.90507	1.70129	1.89809	8.61335	6.77164	1.3191	11.8264	2.65288	2.23886	1.0386	3.88139	1.44928	2.66227	11.595	4.91962	3.12385	4.44979	13.9066	1.83013	3.08499
	1.77935	4.71995	1.8052	7.31086	1.58309	3.73616	3.06511	4.13928	3.44221	5.18001	1.26961	7.41412	4.75703	2.56072	6.75568	1.70227	3.51583	1.63645	1.27031	5.5576	7.14238	4.21515	4.83179	3.01417	6.67706	8.21303	1.52981	4.78385	7.42155	1.30075	1.53502	1.2669	14.5928	2.23672	1.41026	4.41154	5.04182	1.43152	3.40491	5.20986	3.28698	4.33382	7.59572	4.78297	6.67464	16.7034	2.92307	1.23956	6.32138
	8.56907	10.6341	6.5233	7.20144	1.83401	4.6686	2.62489	3.50104	13.3187	5.95777	1.66965	6.60565	4.23539	13.8845	2.66915	7.8171	2.27335	1.29131	1.74721	2.58535	8.05283	8.88259	1.99894	1.78258	1.49932	2.42822	1.0506	12.3869	4.74812	1.35492	4.44142	1.12176	12.9995	2.91316	1.15704	3.10287	1.60149	4.48977	5.60526	6.11342	1.10001	2.85883	4.83541	13.6776	4.21173	5.55545	7.50542	12.5742	3.22728
	2.63036	1.1249	3.0286	2.61564	5.35628	4.07454	12.0305	5.06143	6.4448	1.78648	1.61237	5.01272	7.77971	5.98671	4.68025	2.00777	1.60143	2.79668	1.36731	11.9333	1.98011	12.7711	2.28719	1.13761	1.1174	3.68229	2.31757	1.56557	4.24127	2.29318	11.9607	1.58882	2.24136	3.03973	2.66665	12.0345	3.32238	3.74308	7.81219	6.16792	1.14351	2.201	1.72858	6.14517	2.99174	1.28516	20.6206	2.09508	3.29668
	1.9967	3.46004	3.38399	1.40356	4.3747	2.92548	1.47595	3.05395	7.24631	9.51164	6.47389	1.5815	3.60733	4.75416	3.88752	2.83767	2.42247	1.1904	4.16356	6.18422	17.3275	6.31283	5.02074	5.80473	1.57024	3.21987	11.5844	2.80089	1.1807	2.95266	5.35392	1.00737	1.61618	3.78053	4.0438	5.82316	1.41248	3.435	4.25317	6.80203	1.72332	1.42607	2.80504	3.37622	4.71679	2.12615	3.11838	2.34627	5.19492
	1.62848	7.17297	4.89746	8.2693	3.4134	3.04019	1.10726	19.0195	2.24843	1.64766	1.62786	8.0679	5.25626	1.75071	7.58594	2.37667	1.48119	4.90873	1.17912	4.86885	8.2887	8.33999	3.186	1.37546	4.44783	1.65919	4.71709	9.06975	2.06437	2.66355	1.08794	2.13229	5.18725	1.13766	2.00944	2.23531	4.33896	3.60651	11.6472	4.38461	1.65372	1.6222	2.00391	6.87974	3.61644	11.4633	6.84878	2.17881	6.07884
	2.94342	4.25824	5.40674	1.43908	1.75606	2.57303	6.04208	6.30684	4.8447	1.39488	1.06255	9.1404	18.2383	14.5869	2.99127	5.12887	1.46881	3.35243	5.74885	8.03146	7.78866	4.51565	1.74068	1.89126	2.54733	2.28447	5.64196	6.26739	2.08297	10.1558	4.62667	1.38852	3.21356	6.5471	3.6928	6.06678	8.01084	5.5871	1.70707	20.299	1.50173	3.61828	2.58546	9.23494	5.45386	2.48039	11.3648	1.42897	3.58969
	4.58793	8.61232	2.1927	1.02984	1.12227	1.62994	2.89972	23.2163	7.5047	14.3634	2.50213	7.34059	6.30023	8.98934	9.67127	2.9463	1.13756	2.28934	1.01014	7.91557	5.96776	2.20199	1.5475	1.81286	5.42492	7.29572	3.94978	1.01344	1.20468	3.51906	6.27624	1.44866	5.40266	10.959	1.20418	4.02783	7.63862	3.04178	2.82008	1.28471	5.18173	3.58273	5.2333	8.69091	10.9919	1.73044	5.23988	5.48554	5.07785
	11.7011	2.13367	8.5516	5.8494	1.49313	1.88598	4.82901	7.40513	4.00578	14.2452	2.09458	1.25956	2.98977	1.37765	1.63267	4.5256	1.24248	3.68626	4.03549	4.82148	4.75038	2.73384	1.12928	1.47434	1.53073	4.12561	1.26581	7.46903	1.63957	3.97366	9.03535	1.88181	18.8196	5.26571	1.68842	9.92582	9.75783	4.32709	19.0062	2.94597	1.86508	5.03097	1.58146	4.44858	2.54991	1.73227	1.8948	4.8265	1.0802
	4.93541	1.06508	2.67542	3.24868	3.75982	1.09063	4.12473	7.98379	7.62923	8.0513	9.3108	2.5256	6.79525	1.58541	8.66345	4.46991	1.45466	5.5503	4.44823	3.38052	16.343	1.31536	2.60781	1.63158	2.75552	2.53579	2.51677	1.09619	1.22194	6.4402	3.79992	1.48438	1.54575	6.54067	8.59756	5.67913	7.68793	3.21851	1.28952	1.59639	1.06137	1.39052	11.9614	4.69343	6.55018	1.15228	1.25937	7.47457	2.94199
	7.0198	3.10466	10.6181	3.66964	2.39446	4.84618	2.11897	8.88832	2.76581	6.58489	2.29554	2.12518	9.82774	1.89375	2.15813	1.35542	10.1738	3.21161	1.4345	7.53638	7.3868	1.60646	5.90294	4.27649	1.92278	1.66573	5.2854	16.2459	1.49251	11.1275	5.57517	1.00013	2.11773	15.8043	1.32261	3.81741	1.15193	3.55309	5.08497	2.74638	1.0102	2.80446	1.73204	3.3864	2.41337	5.51728	5.82095	3.16383	2.82282
	2.56341	3.00113	1.75372	3.97514	10.2877	2.79443	4.01619	7.84806	10.1372	5.237	1.8354	1.27518	20.3158	3.0591	1.9218	3.1007	4.97757	5.66598	3.60102	7.18209	1.08205	4.00088	1.42244	6.01719	2.44755	1.94469	3.53517	1.86433	3.75191	9.1072	5.25573	2.24714	4.43302	4.00292	1.47727	1.21246	6.31653	3.07632	9.29665	12.9554	1.87377	4.47727	3.76399	7.94743	9.7417	3.51079	3.73747	1.17555	3.80699
	1.42999	1.18296	3.43881	1.95738	1.4876	3.99428	6.32834	23.124	2.34021	2.69185	7.61626	1.33195	2.46604	5.89644	3.33752	3.59203	1.48708	5.78699	3.24789	5.25685	9.71157	2.38742	7.37046	2.74647	4.64791	1.23095	3.50393	2.05325	1.43199	7.95519	3.5132	2.26794	7.30785	13.5855	2.84586	1.46395	7.39306	4.92517	4.23671	19.5977	3.25499	11.0957	7.80647	1.40082	4.72485	1.97308	2.69594	2.35706	2.02231
	5.35785	11.2402	1.97958	5.02808	3.13618	2.27613	6.75182	5.22565	13.9133	5.0715	1.15598	14.9033	1.79176	6.40965	3.88216	3.62291	1.62795	7.05347	9.14552	1.17061	23.2973	12.2644	5.71891	4.40388	3.29548	2.5197	4.0057	2.9283	6.5029	1.74303	6.54135	1.49794	2.36787	4.81093	2.77534	3.45733	9.40302	3.81578	1.53122	3.24575	6.66121	4.17491	1.42772	8.5619	3.6249	2.09458	6.00699	11.9621	2.13587
	2.91278	1.40472	5.24123	8.14212	3.34653	3.6485	1.79701	3.4684	2.07129	6.59459	6.41473	1.72933	6.84427	4.79992	2.1637	8.2224	1.61086	13.786	8.24047	1.23583	7.83583	7.194	1.72272	3.97449	6.983	1.70443	8.7845	5.25322	2.96418	5.84179	3.43269	4.7841	3.35758	15.893	1.3491	1.79759	1.86252	3.0478	4.69048	4.27675	5.41253	1.85974	1.25886	3.05497	1.11808	9.21198	1.4074	1.10076	1.90805
	8.7553	4.15016	3.4864	1.53144	1.71593	3.89679	4.4646	2.98453	4.47991	5.48736	7.30966	4.57458	5.8192	9.41764	3.74049	4.79525	5.33711	2.7379	5.13959	2.68472	19.8592	2.38281	2.47309	3.83864	2.38626	1.84919	1.19639	5.24517	6.01018	4.74347	2.61837	1.30895	10.5115	13.9952	1.15081	13.5801	2.40779	2.71081	2.95707	1.44439	2.98197	5.2087	4.14896	4.50968	1.26187	19.5869	3.66058	1.28347	1.77346
	5.11268	8.95161	21.7681	2.27319	1.1684	3.05156	10.5608	4.03982	3.06163	5.29398	2.73643	1.13726	10.0847	2.90658	1.78775	5.07373	4.25554	4.84586	2.16198	4.25567	10.0158	6.2167	2.70135	2.69658	1.30279	2.8248	2.19608	2.02689	1.98882	7.05487	4.29217	9.5899	7.6077	2.65431	2.84313	1.00879	10.9683	2.76343	11.2685	2.31302	7.57673	6.25713	1.51625	2.20371	4.32691	20.8441	12.204	1.64816	6.27862
	4.06129	2.61147	3.10278	4.51618	7.38495	3.00718	8.53247	9.58408	1.60185	2.15869	5.89684	2.68143	3.25233	3.19596	2.11689	6.23449	2.1484	4.04524	4.99157	5.48731	1.13541	16.2607	5.33644	17.2289	1.48818	2.01606	7.34263	5.47582	1.91686	2.70098	2.28257	1.90622	3.59306	20.1755	6.58852	5.29261	8.30426	1.99666	3.13686	2.4608	2.5672	1.0271	12.6183	6.45877	3.60999	9.12572	5.23104	3.62862	1.68935
	3.2546	5.70004	4.62454	4.16733	6.16535	1.58927	7.70731	11.2403	6.80375	1.93803	4.68169	1.92402	1.88769	12.0019	2.06657	4.64526	2.56865	6.66715	13.8125	1.60466	3.30451	1.82449	24.0478	3.13933	1.46083	1.34304	5.25184	2.63393	2.16009	3.74611	3.22191	8.57077	7.77595	4.96324	14.7836	6.95122	2.24296	3.39564	6.51016	8.62719	11.4205	3.75963	5.46296	10.5717	4.0486	18.4005	15.7395	1.24551	1.9452
	4.12871	1.38478	1.05013	2.80533	5.5002	1.38292	3.75901	6.73009	1.97016	1.98229	5.65879	1.16774	3.39167	1.94075	4.2313	1.65705	1.2413	2.16737	3.76344	8.66094	3.65006	3.85831	2.07554	13.2731	2.23886	1.47573	2.70016	2.7672	1.1603	4.61393	1.3105	3.11344	6.16231	3.58889	3.11077	6.53094	7.46315	1.37408	3.15596	9.61328	5.29969	2.16294	5.38294	2.0556	4.07277	16.4887	1.12283	3.2323	2.40925
	1.92692	3.33027	9.92943	2.13429	2.50931	4.24671	11.7018	4.34806	7.48132	1.01479	1.82319	1.7579	1.20781	12.943	4.87554	5.85786	8.32954	5.91525	14.0525	3.48936	10.2726	5.32665	7.4174	3.7745	1.89442	3.1867	2.02503	1.54506	14.9191	12.8499	1.83417	2.64683	2.23435	14.6917	10.6869	7.02043	2.23087	2.76262	1.56678	1.21869	5.79123	1.58791	2.62673	4.16892	1.35088	4.15576	1.18911	2.32208	2.15059
	5.5587	3.22883	4.44408	6.1137	10.9649	3.2046	4.67998	10.1586	10.965	5.77531	2.68666	4.23549	5.52232	5.55305	1.01421	1.41277	2.47611	2.27393	1.44511	1.27659	1.32882	2.78831	3.41138	6.1045	3.62269	2.66044	3.21659	10.3131	4.18187	1.34606	2.19551	2.81503	6.15786	2.59067	1.43637	5.3303	1.88428	3.89651	1.58983	1.4133	1.08901	1.2981	4.79288	2.63571	4.27133	6.84942	4.93939	2.10252	2.29849
	7.66384	2.04377	5.9415	9.42241	3.77735	3.4555	5.49137	4.34133	4.44249	1.48156	5.93722	24.824	2.37781	4.4046	1.66588	6.95411	2.09181	3.53727	8.36702	9.25517	1.5128	4.19945	8.35299	5.86219	1.22276	1.13494	1.09727	2.1338	1.67611	6.29688	1.51342	10.4806	10.032	12.618	7.37663	2.18411	1.94083	1.95167	1.24342	1.04827	5.17892	1.16009	8.49702	2.69851	10.1223	26.328	28.2811	4.11983	3.98574
	4.35832	2.22251	15.9401	10.5524	1.31093	1.14185	1.07506	6.10273	8.62307	3.61752	4.56478	1.8722	1.38076	7.75061	1.31365	5.59979	1.30024	9.20355	2.00511	1.05648	26.9745	1.16118	5.1785	6.14102	1.15691	2.14222	4.20973	12.6578	4.9492	4.81685	5.1798	2.50124	4.44958	20.2749	4.48169	5.55029	15.56	5.36981	2.68112	11.06	1.16807	8.0554	7.57367	2.99217	1.94657	1.30572	2.80685	3.84111	1.18465
	7.12777	3.94414	5.27943	7.56805	3.68463	2.22933	1.36197	11.5211	10.5751	9.73018	6.82463	4.61306	5.0245	4.00969	8.19533	6.55543	1.03441	4.02323	2.32364	13.1301	8.29489	9.85272	5.18257	3.41326	1.47754	1.4883	4.02074	6.81439	5.24173	3.08909	7.6378	5.24845	1.38771	1.315	2.99156	2.96559	2.21105	6.37958	4.30322	1.90884	1.7356	2.46488	6.72592	12.051	11.362	5.83627	1.16658	1.07731	1.25334
	2.67091	2.02419	7.2601	4.91014	5.94763	1.38067	1.67835	3.78182	9.17612	3.68451	5.72077	3.45903	2.17826	8.96584	1.44233	6.0062	1.29317	3.60674	4.51946	3.54819	2.59337	5.8054	3.31174	1.67167	5.14836	3.12537	5.6059	6.34575	1.31923	4.70554	1.84072	2.60794	5.43357	3.89279	4.73374	3.79096	7.61783	1.55563	20.38	1.58948	4.88441	7.92994	7.01448	5.4437	2.94946	2.79755	1.49976	4.59727	2.78777
	1.02782	1.65202	1.25384	1.47212	8.08701	2.35595	7.39795	5.11582	4.89381	3.50113	1.0541	1.00011	3.80548	1.23832	3.93289	5.08806	4.6528	7.68624	5.48034	1.7514	6.85462	3.55696	7.87799	3.31883	1.42892	1.63155	1.21702	9.51276	1.71534	7.32329	2.59088	9.00257	3.24733	1.29856	3.71383	4.72942	3.15851	2.81404	10.0982	6.76864	4.97396	1.17222	4.78406	2.38024	5.00195	6.8876	4.93321	1.49223	4.22827
	2.33758	1.97417	1.23281	4.67355	7.65618	3.80759	1.75377	2.96744	1.80003	7.37993	10.5414	1.00354	1.52429	3.05127	1.72052	6.06465	1.66096	4.62771	8.11164	14.9498	4.28513	3.72685	1.41803	4.71478	10.6098	7.17911	4.19488	9.11954	2.69316	1.31158	6.2409	7.94501	10.1021	6.36691	3.41152	2.54362	5.66781	1.96814	25.4222	1.75069	7.70108	1.60631	10.0942	1.31934	4.32893	7.72382	4.85941	5.31064	1.83795
	4.22348	2.2456	37.9053	3.94602	6.4804	1.94857	1.01924	10.0198	4.34954	6.15115	3.94218	1.37691	1.63702	6.6879	12.0173	3.19555	3.28655	9.72316	4.01477	2.54877	9.27197	5.14379	16.1027	8.09998	6.37922	1.8703	2.7422	13.7167	2.83551	4.57946	4.20707	2.76936	9.21942	2.26246	6.7124	4.32264	7.39499	2.76865	9.45076	7.49563	1.48357	1.52811	4.18424	2.06324	4.80178	2.15258	2.05344	4.2564	1.92768
	4.4446	1.12105	9.6305	1.83837	1.51159	1.64059	6.59785	5.22151	7.53686	6.07477	1.76262	1.91678	2.93656	2.13572	1.99583	3.01799	14.2065	2.0957	6.14796	2.91783	15.2804	5.20679	1.30416	4.62124	1.1017	8.02454	5.6354	2.97224	5.39215	3.04279	4.68624	2.68707	10.5131	4.67221	12.0613	4.86726	3.29821	3.0217	17.641	7.99232	4.14262	1.24666	1.11931	3.2192	3.95919	10.0677	1.0402	4.99917	3.13966
	3.50542	8.22161	15.2094	2.55631	3.41987	1.87715	7.47143	2.90734	1.33585	1.46429	1.25318	2.98546	8.19422	4.54063	1.48976	6.83224	4.74534	3.15031	9.55827	5.48136	2.91268	3.36335	1.13504	9.2848	1.90759	4.10802	1.60232	1.65124	1.87921	4.73214	4.58085	3.23235	6.63232	6.28968	2.4968	1.15844	6.67811	4.57733	8.00581	1.06554	4.82095	1.13751	3.27128	2.74901	1.4266	35.3065	1.66193	4.77366	1.85548
	2.0528	1.46558	17.4309	1.40462	3.68233	1.9796	1.48089	13.4871	3.41766	5.20729	2.48711	1.02982	8.63394	16.383	1.56586	7.03793	1.56135	5.48932	2.33223	12.2986	1.23978	2.79838	1.68595	3.4097	1.82857	1.55515	1.40254	11.145	5.89025	8.51814	4.07092	2.1965	2.78434	19.2688	2.60938	7.26967	5.85924	2.96988	25.2108	45.2751	5.42865	1.03798	2.34793	11.243	2.14916	2.03034	6.02467	1.70621	2.36579
	2.32909	1.13469	2.36486	3.47781	5.24973	2.81355	1.48608	5.10805	6.52781	1.47277	9.87001	2.16785	2.64599	9.33849	5.33501	1.66753	7.20259	1.12156	3.46992	1.79348	2.60162	1.3886	5.40711	2.81417	2.63091	5.17562	3.14196	9.92209	4.8268	4.19726	4.4676	1.60645	34.0532	1.93281	2.73444	5.62231	2.8414	1.83358	5.48736	1.2471	3.06743	8.7906	5.19581	1.00658	5.73297	7.70289	12.9282	2.0147	2.09241
	4.43706	1.48342	12.0186	3.75667	4.61226	2.50791	1.26175	3.27361	4.9248	1.16937	3.49284	1.21613	2.7048	4.84856	11.1223	5.38253	1.67098	6.0655	1.62041	9.03748	1.6269	3.50865	6.87225	5.04929	1.04649	1.94318	1.11019	36.1047	3.70439	2.48575	1.2758	5.10105	15.5321	2.0558	2.16605	6.8342	3.0889	5.17861	1.98367	2.07312	3.19691	1.33072	1.68668	3.6686	2.53219	26.9847	2.36939	1.14504	1.41737
	1.95332	2.19733	4.35939	2.18473	1.01618	3.46642	1.35924	2.08829	9.69233	5.76864	1.51424	2.87383	2.15236	4.63008	3.34742	4.3712	4.72471	3.93333	4.46187	4.12435	1.71506	11.2377	4.48982	6.35883	2.0636	2.49909	3.32285	8.40266	5.65398	10.1538	1.283	11.2176	13.6792	8.0852	4.14315	3.12482	6.46832	2.52564	15.5085	4.71739	4.7186	7.27295	4.6927	2.73076	12.2795	14.5912	5.06843	1.0721	1.63397
	7.13107	9.82851	10.69	6.65437	1.31647	1.02723	3.772	2.99489	7.9379	1.18392	1.28088	6.40982	1.30584	15.2366	5.74663	1.20488	2.94823	3.06701	6.59682	13.8048	15.314	2.01675	7.89951	1.88458	1.42436	2.98262	3.1732	5.38429	2.72611	8.18766	3.63692	10.7126	11.4025	10.5371	4.17626	8.67454	1.59811	9.16751	3.77372	4.55963	9.25322	3.83951	4.23559	1.47805	2.35175	18.0319	11.0701	1.07768	1.33606
	2.35691	1.97801	2.87304	1.16803	1.24866	2.07177	3.51274	7.77761	4.60267	2.0035	5.01835	1.73009	1.06918	1.45845	4.07663	2.31932	1.68512	5.6446	4.98475	1.35767	2.24959	6.79089	5.77297	1.67434	1.67053	6.62119	1.70742	5.8112	1.53399	3.21025	2.00502	1.74526	2.43605	26.9414	7.49	1.94837	3.61242	2.16777	11.2448	9.10084	2.26373	2.06759	5.22668	3.45727	1.64168	2.88051	4.44227	1.54061	1.52321
	2.54031	1.07348	7.57675	5.497	6.05049	2.1275	6.93954	3.40053	1.52643	8.83239	1.13908	3.75392	1.62932	4.52785	5.45709	3.10567	3.91014	6.97646	4.11531	11.7577	4.92168	8.55153	2.10299	4.5816	15.4638	2.39706	12.3615	3.22706	2.08701	10.7956	5.13921	1.60193	4.06435	3.52668	4.8849	2.58245	2.25407	1.32588	11.7235	4.36273	4.8537	1.08147	4.88298	7.50949	3.26321	3.2755	3.61285	1.70695	1.17483
	7.2876	1.49916	22.3167	10.8242	7.86606	1.38572	2.30513	4.3579	1.78015	1.24939	2.36925	3.04566	8.51	2.35091	4.91184	3.68191	1.6639	4.41302	3.01424	6.78549	7.83495	5.21465	4.69843	3.66225	2.36954	1.03291	1.11482	2.79796	1.00226	7.34299	1.41458	1.54542	24.5948	4.5385	2.48939	3.76846	4.73486	2.21154	4.92164	8.35121	4.10322	2.03706	1.53704	1.1445	2.77989	4.96445	2.15463	1.49335	1.12296
	1.31872	1.94688	3.97686	18.0612	2.53376	1.59802	5.26898	1.04492	1.19437	3.82515	1.76731	3.50133	6.5831	7.85077	5.05042	2.54651	1.3692	6.41316	3.44365	17.228	8.28988	6.61077	5.48285	1.46855	6.94147	10.5126	6.99339	1.31806	2.61515	6.03288	3.28279	3.78035	5.65121	3.3186	3.22413	7.80191	3.46401	5.48347	5.07113	14.5356	1.20645	10.5178	8.44158	4.4333	1.5003	2.61951	1.27307	1.43827	1.58771
	2.21405	1.40332	3.50633	4.52577	1.45577	13.3836	2.46975	5.66289	9.09018	6.57671	2.0819	1.86687	8.34125	3.51255	3.22926	4.98826	4.08638	3.04972	3.57071	2.28702	7.79338	1.52809	6.36557	9.05897	14.1271	5.36008	6.13043	5.22539	4.34259	5.22909	1.96902	4.0765	17.1633	3.83202	2.58445	8.22557	4.92049	1.38613	19.2143	5.35111	2.13528	5.56041	7.05733	1.00276	30.6557	1.72199	5.06931	1.95591	2.28938
	2.87176	1.08152	1.60425	6.4899	3.84654	1.3638	3.66529	5.76858	5.82803	1.54734	2.08566	2.68219	1.12029	2.67203	1.50399	3.01688	6.29843	3.40619	4.44975	1.58263	3.05891	2.80487	1.88693	4.57403	8.883	5.6315	3.75057	1.41252	5.12763	2.93936	2.10321	6.45023	28.3261	2.97609	1.46403	4.78287	9.32906	2.30232	2.77595	12.2495	1.44467	2.38417	2.67966	4.85596	1.03511	1.74585	7.33044	1.6355	1.17063
	7.28949	2.36417	10.0335	1.02309	6.11092	1.113	4.41073	1.33918	3.15751	6.65278	1.73633	1.98307	12.1383	4.33864	4.22305	2.91432	7.47372	1.20204	4.15648	6.09895	8.3515	2.90253	5.06717	4.04799	5.73087	3.73608	5.22234	12.8101	4.88755	1.27809	2.16867	1.17873	9.96345	3.18846	2.43252	6.17705	3.13917	1.62552	4.45141	8.41147	1.35512	2.80362	3.65027	1.44792	9.08721	45.238	1.60714	1.92279	1.26386
	8.36209	2.9672	3.22622	11.2572	1.40457	1.1276	1.59228	2.64365	3.8304	7.18897	6.5847	3.13329	29.8053	6.24641	4.29378	4.29676	6.29844	4.00092	3.98219	2.85371	5.19381	1.55763	3.45968	3.05559	4.2908	6.69357	1.01801	4.64837	4.94068	25.1338	1.6607	2.14269	8.00696	2.88742	1.83023	2.12222	1.46759	6.06146	3.63936	11.7378	2.07771	4.66588	1.9387	3.76578	6.90986	1.3182	2.17982	4.13434	1.89053
	6.49505	1.98081	1.23391	3.4707	1.92858	1.31591	1.10323	6.64772	3.28028	1.3679	1.33722	1.22413	18.1501	2.66832	6.79569	1.8848	1.03677	2.07747	1.56964	2.42935	82.7531	2.28617	7.28979	3.67072	4.24674	3.17614	2.01539	1.53335	8.63991	2.61332	3.80253	1.5106	10.6017	1.09404	1.01407	3.49502	1.03495	1.22707	26.7664	16.157	1.71053	1.61635	2.67556	14.8997	2.09599	4.11648	6.70914	2.446	2.56837
	4.58604	29.5894	8.54882	1.51652	1.49821	1.21932	1.02248	5.31735	7.32289	3.95336	1.1264	5.76061	8.71655	6.56299	4.33091	1.67691	1.50889	4.34669	3.03672	3.49245	7.16213	4.45367	2.75879	3.97984	18.6099	5.76018	4.52849	4.10065	1.93861	1.92182	9.05827	1.86417	20.2535	3.48736	3.05779	3.20246	4.38778	4.90548	2.49935	1.9787	1.1824	3.59235	2.11764	1.0592	10.7873	5.99963	11.8721	1.24737	1.71038
	1.87459	1.59955	1.0158	5.33216	2.05496	2.87497	2.55764	4.46359	2.22797	1.53855	1.53255	6.95998	3.75717	8.90359	4.82192	4.35907	4.60624	1.9115	2.93821	4.57735	8.77813	5.10384	13.1361	3.05336	13.3698	4.17638	1.09052	2.01371	6.91784	1.44506	1.94742	1.70728	14.6861	2.91817	6.14128	10.6887	2.04331	2.40193	13.7955	11.2573	2.20693	5.1213	2.23105	1.00234	3.77231	1.23854	4.08567	1.53875	2.49336
	4.21358	2.09589	7.60886	7.90482	2.12785	1.2159	5.49254	2.73327	2.04206	1.50369	2.20492	2.67762	17.2153	1.52893	4.85306	7.46639	3.76574	2.73601	3.4631	5.4785	7.24115	3.49601	1.84219	1.72912	6.12241	5.86673	3.87225	1.25289	1.35801	7.52867	2.99215	4.13075	25.4997	1.78551	1.43871	5.41245	6.71388	1.1608	13.5709	1.78409	5.00799	1.21153	13.1314	1.36305	36.6706	10.2468	5.78914	3.38116	1.69425
	4.40924	1.06369	1.44981	1.17656	1.85616	3.00349	3.33527	2.20278	7.81221	5.15485	1.05644	1.99335	4.81234	5.03241	1.67681	6.05748	6.16051	3.57813	3.38657	13.6668	4.27128	5.57661	6.36302	22.8657	11.8867	1.60591	1.08878	2.95613	1.53354	9.38843	1.73074	11.1624	5.54637	3.57674	1.41572	4.96853	2.19897	1.46727	13.8238	2.00557	1.42344	1.07436	10.3377	2.86656	17.3713	5.82379	3.42196	4.97758	1.57228
	1.47242	3.26731	1.72604	4.73785	4.85673	2.02523	3.21103	8.32778	3.03357	10.7516	31.1074	4.56124	7.02911	3.07724	1.09401	3.82529	2.02993	4.9389	3.70029	4.2539	1.71948	3.6087	1.50836	4.73928	6.89842	5.70087	4.53428	3.63347	1.14304	4.2869	1.70914	1.02817	6.71803	2.33611	1.32612	7.94144	1.72186	6.01166	2.74434	2.48843	1.54114	4.22091	5.08744	5.30451	1.77781	7.94114	2.38574	4.93702	1.41456
	5.79962	15.0368	3.13599	3.25081	1.16563	4.15472	1.46933	4.28538	10.4605	19.618	1.60673	4.42523	8.61012	57.7606	4.3872	6.72472	5.68722	1.86655	4.4164	3.52351	7.07604	1.88647	6.4786	1.18348	2.27938	3.22339	4.09074	1.04713	3.15629	1.98535	3.15121	1.23886	11.6813	1.70828	3.14076	1.33905	6.65588	3.676	1.21049	4.12091	6.44038	7.26793	6.98582	13.2146	6.56227	3.24833	1.10957	1.06466	3.39762
	1.76285	1.10706	14.5623	1.11652	5.97162	7.40424	7.51608	4.2144	1.70591	2.93948	1.10528	2.20823	4.70451	11.1473	1.50358	3.67364	2.88752	2.9067	4.37245	5.82706	6.50495	8.24164	1.71205	3.56559	7.2464	13.6038	1.07702	2.93562	2.19439	5.07296	1.41719	1.42379	21.4472	4.50561	1.4874	2.0834	2.26084	9.11007	1.90069	2.92985	2.91007	2.62254	5.10004	1.85658	3.62973	3.2241	19.256	1.81933	1.54775
	6.32532	15.1322	6.29025	3.4199	6.54544	3.71596	1.18982	4.13825	3.914	5.48706	1.10715	6.27686	6.9633	14.3016	1.01936	4.55042	6.03968	5.69175	6.04565	2.65828	3.27916	7.14722	10.317	2.66763	7.16282	1.02638	1.07336	9.40512	5.40896	3.12504	2.68187	1.32477	6.81108	4.44411	1.069	1.01947	3.48963	10.7183	4.32034	26.7989	5.44554	10.1573	2.75904	1.62445	1.04679	11.0753	1.74987	1.29873	1.02833
	5.54408	2.64925	4.25587	2.04477	2.59373	3.94305	3.51742	7.44294	3.79123	3.51507	1.80112	1.49045	4.91807	5.76617	3.2837	1.04882	2.82976	1.5585	5.81908	4.09703	6.46131	2.69918	2.72169	11.8745	13.074	3.83459	4.74313	2.12208	1.83079	9.4165	4.03622	1.07745	6.35319	1.27138	4.53078	1.69462	2.38798	3.73424	3.7882	8.88091	2.2297	1.68075	4.26867	1.48357	10.2335	8.96236	2.59652	1.71477	1.1524
	2.10702	2.61567	9.47496	1.02203	1.90966	1.76838	2.93347	9.32194	5.54683	8.00129	2.79653	1.46873	7.69148	7.28356	1.3852	3.24518	6.31612	3.0645	3.14458	7.03425	17.2579	7.08507	4.24919	2.92018	6.98199	9.59828	1.3281	5.11921	2.20828	9.59184	3.9904	1.67563	5.29273	3.01256	1.72894	2.8902	5.37004	1.83117	7.84973	6.58132	1.62941	5.02386	1.01535	3.4666	1.05041	16.5805	2.60315	1.27342	2.17863
	6.95474	10.7177	8.7326	1.78224	3.2529	1.71156	7.62046	2.15875	13.756	4.44802	8.02475	4.25074	2.58157	24.5227	7.93219	4.27801	2.3488	1.60313	6.43364	61.9281	2.12251	5.33041	1.43414	10.095	3.67993	7.92502	2.24371	4.0406	1.64024	10.271	1.26468	1.37044	8.22332	3.91711	1.40092	1.71544	7.18036	1.92837	1.43638	10.8796	1.03502	4.90801	4.14549	8.60774	2.0243	2.86252	3.72818	2.67746	8.1355
	1.11598	4.60697	7.64097	1.19325	4.77739	2.20786	4.65661	5.51732	3.05403	5.41461	1.86075	8.01304	2.40862	8.40728	24.7864	9.36718	3.7121	1.67732	3.32923	2.2174	6.10898	11.3354	15.0986	4.85865	1.30887	3.65314	1.8642	12.4433	1.14774	4.5174	1.22147	2.00705	5.21498	4.75587	1.36508	5.72133	15.0394	2.00951	4.08984	2.8408	1.36023	2.02493	2.14127	1.16572	8.83427	9.47628	1.35571	2.18923	3.64927
	1.36068	1.58801	3.20408	7.81743	1.88983	2.38932	6.49762	2.87367	7.24338	4.9933	1.42784	2.93708	1.01667	1.6728	8.80224	1.68132	2.46432	1.28282	5.2083	4.19067	7.16803	5.38778	3.5983	6.59401	3.02094	9.35099	1.25366	4.70256	3.29842	7.66165	9.96226	2.75489	4.77174	3.7884	1.18159	2.09915	4.18379	3.13416	2.80559	8.75923	2.17929	1.11743	1.02448	5.66607	3.29704	2.17057	2.86032	2.06978	8.43622
	6.82225	1.89931	2.80938	2.83411	3.16986	1.12057	2.10092	3.19072	6.04258	25.7328	6.20908	9.29927	1.17141	14.9303	12.3854	3.90193	4.82314	3.02646	9.56812	6.52991	1.82827	2.04253	5.45151	9.39482	4.37641	4.05625	1.12407	4.66229	1.9561	2.61134	5.02204	1.22485	8.15226	2.47841	1.84581	1.0341	4.10596	1.63235	11.8157	6.27809	1.02657	2.88643	1.12183	9.30878	3.41707	2.45873	3.6186	3.25352	1.8702
	3.47949	4.6409	21.1099	1.12078	1.79942	6.47559	1.95941	5.24741	3.36095	2.41997	2.06406	3.1771	5.0455	9.71814	1.01998	6.77986	1.01261	3.34992	6.66679	6.31928	2.72811	2.0736	1.26705	14.592	13.2923	5.95771	7.5293	19.5066	8.15749	2.80146	6.17805	2.04593	7.79219	12.1925	2.10566	1.89548	1.2607	2.14125	3.14674	13.4237	2.79339	6.56869	1.2176	3.30747	2.0972	6.62477	1.91911	2.15537	1.33816
	6.5719	44.4649	3.60376	2.00995	2.55129	1.77361	15.6732	5.07024	6.82714	8.68902	2.60402	4.62678	3.54992	9.71814	3.79472	1.01188	1.47058	1.84046	2.88693	1.69368	1.741	6.59472	2.14264	3.01996	15.7546	6.28995	2.67567	4.88636	3.87072	2.34243	5.64391	1.48664	7.03987	7.78702	1.09588	1.80377	1.21235	5.61562	2.01133	1.13156	3.21175	2.12112	6.89603	2.96162	6.05881	2.27189	3.63186	1.03079	7.67636
	8.25507	7.29504	1.77199	1.78651	3.52273	1.33936	10.9461	3.27672	4.48633	16.3142	2.55519	3.28149	2.19647	3.94786	6.87632	2.26859	1.32558	6.995	2.62499	9.59492	3.43159	5.97579	7.22252	1.86854	3.27065	5.44503	3.6206	8.79881	5.83645	2.601	11.4534	1.25921	11.3136	5.09196	5.00177	1.90673	2.64949	5.08222	5.73895	1.2114	2.61402	5.02888	3.56174	1.77722	2.30664	5.27133	2.015	2.41809	7.88665
	7.95002	1.58276	2.08143	4.64548	9.93163	5.82245	19.8685	5.0578	9.5187	13.0488	9.96861	1.58226	3.19073	4.50065	8.95733	6.82673	1.29611	2.19849	1.89978	1.50287	1.24863	1.65393	2.06757	11.7034	2.48351	4.51515	1.04346	1.32026	5.43967	2.76797	10.4473	1.44504	10.675	1.92351	8.67587	1.26478	4.72713	14.4441	3.68942	7.98925	1.9444	1.3119	1.17853	4.34376	4.05022	5.92327	1.55544	1.23695	4.64605
	4.42857	19.358	7.06525	1.08349	9.14517	5.27457	1.63317	5.18783	6.16769	1.22787	8.42432	8.22716	2.77341	3.47504	8.8837	5.4498	1.6197	5.07313	3.50857	6.77712	10.3033	10.5852	9.16096	3.95311	7.97529	5.1927	4.8139	2.38496	3.05362	6.89677	1.71242	1.88633	2.29681	7.18494	7.91308	1.55115	4.91614	4.08128	3.05125	7.20276	1.73816	5.07153	1.52696	1.02738	1.64127	2.29097	2.27615	1.44014	4.18902
	3.85054	1.81851	6.66446	6.86289	2.46503	1.16269	3.98595	2.34732	2.23849	2.82582	1.13345	4.21073	1.85618	9.44072	2.94735	4.40153	3.18104	2.88753	4.52073	2.5512	2.17382	2.5614	6.40454	4.95219	5.43505	3.36965	9.03288	11.6597	3.13208	19.2418	12.7672	1.8479	8.07643	39.041	3.91446	4.71592	3.58003	3.01969	2.47564	7.34862	1.9403	7.89941	2.23704	4.44688	3.37719	2.68779	1.42552	2.46907	3.20485
	1.9208	5.2838	9.8082	3.05294	1.22145	2.40636	3.513	3.86368	1.17098	1.80164	5.18409	5.38114	3.5114	8.16118	2.1934	7.51051	5.75087	7.65197	4.02867	8.69575	5.78879	2.405	3.91908	1.23471	3.26154	2.42973	6.68986	3.06743	3.00767	3.3186	6.84181	2.15128	9.26785	5.24212	2.66237	1.27716	3.91164	2.90843	2.15161	8.60262	1.47256	1.26297	1.87727	9.24215	2.39887	3.85989	2.62878	3.52517	1.17063
	1.21216	5.20755	5.61267	1.29698	3.95586	3.5291	3.40979	4.05122	4.91778	4.55411	7.84493	1.89925	5.56013	8.33803	4.4235	12.4618	2.29929	3.57782	6.99719	7.10827	1.1186	4.22113	4.6442	4.22705	4.22293	3.49732	4.28995	15.7845	3.88619	4.94294	2.48942	1.24791	5.64228	4.5292	5.72171	1.50164	1.57635	3.24823	4.81495	1.66241	1.56442	2.75679	1.10261	2.75071	13.6292	9.30191	1.45292	4.39632	6.12371
	7.48562	15.4971	2.60788	3.14673	12.0659	5.5243	2.2941	2.65194	9.78353	5.5301	4.7371	14.4141	2.09984	2.50508	2.38353	3.00255	6.20649	1.20204	3.22314	7.36474	2.72958	3.28498	2.91046	1.25787	8.87185	2.93186	4.76337	5.99719	1.07377	4.19825	6.32141	1.51603	3.97289	5.33865	2.29032	3.1507	1.50143	2.3931	14.1867	2.35217	1.19903	2.3252	2.51111	8.26994	17.7862	8.72633	1.52892	1.07433	2.03633
	4.27251	1.76815	5.19694	1.63375	3.46876	3.25267	2.61943	6.07371	7.67775	1.68949	7.19556	10.4274	16.4598	3.34106	2.51449	6.48539	1.35564	2.24501	2.55906	3.78152	1.95505	3.77465	4.65708	3.55223	15.1493	2.01003	4.49321	9.16055	8.10369	6.85195	7.99324	1.16788	7.33366	13.6827	4.47935	1.14325	2.87524	2.9249	39.5878	8.89434	4.43509	1.80872	3.88244	5.9453	7.51964	4.90755	1.04904	2.67486	11.9895
	1.93635	9.29649	10.922	1.47887	7.30331	4.01439	7.13168	2.45663	11.0504	3.62813	9.08777	5.64403	4.79134	3.12464	1.87705	1.33833	2.19791	3.0535	1.84244	5.67724	5.60334	2.51205	6.06714	9.10218	3.21646	3.53854	7.27474	25.8546	2.00855	3.32747	4.94284	1.16155	7.5991	5.1649	2.43875	4.40366	17.702	1.64681	7.21221	1.01104	1.58438	2.10314	3.5063	8.19653	4.88153	1.35197	4.65261	6.5889	1.88702
	2.06271	2.42224	2.65605	1.535	15.2639	3.86215	5.18642	8.57904	12.9703	1.06298	5.49539	2.28977	1.72664	3.48163	3.67099	13.5255	3.25767	2.93059	3.20596	6.25208	10.4336	1.36692	9.85371	3.10993	5.65236	4.95546	10.0382	1.38397	2.55485	3.16691	1.27646	4.18953	6.68458	19.434	5.12293	6.96416	1.4149	2.55416	7.80889	10.4554	1.09387	6.6607	14.9479	2.94634	4.42438	5.49745	1.95136	1.34636	2.01039
	1.74352	4.43313	7.99304	1.5524	2.82621	3.06003	9.55742	1.836	20.8865	4.22554	2.91861	1.41691	5.94734	1.693	3.14656	13.1836	5.30174	4.00123	1.68533	3.37457	8.36948	1.1284	4.87636	4.70276	2.61926	2.26486	1.63105	1.03468	1.02826	3.42154	5.53197	4.86503	8.19847	9.67765	2.36746	4.00307	2.53348	11.8984	1.68928	6.1637	5.90458	1.15507	1.50994	2.91366	7.24778	3.79272	2.11796	3.20142	1.86669
	2.01273	1.82796	2.5802	3.60676	6.2756	3.66185	2.89998	10.2451	4.38988	1.92682	4.48543	1.04011	10.7786	2.86083	2.00367	7.84357	1.95566	6.68129	1.74595	3.73128	2.61872	4.41645	1.75577	4.95041	16.3877	4.09043	1.49838	5.70942	2.17219	6.14863	2.63866	6.42491	10.3812	13.6677	2.06125	6.41504	1.42312	4.43554	14.8947	2.08041	1.62865	3.36987	1.50364	6.64295	1.9663	1.12695	1.74633	1.29836	1.38372
	3.25177	1.18576	4.85594	1.90622	9.7176	8.23242	2.44171	1.18946	10.4938	7.26111	9.61599	5.04739	7.7531	2.82455	3.41671	15.5774	1.32205	1.30357	5.81958	8.47344	3.45429	1.40858	4.54981	1.02848	9.5582	4.13868	3.91217	10.6924	4.60465	2.66503	6.80319	1.34331	1.82617	12.5951	6.99484	2.23531	3.2112	1.62592	2.54281	1.02946	1.93391	2.63467	1.87601	1.58626	7.19139	6.63028	3.38661	3.81617	6.32068
	3.24752	1.93569	5.80255	10.3169	3.34468	3.72182	1.14192	3.44716	2.20166	1.29303	3.90744	6.91083	7.83992	5.6153	4.08591	3.75967	9.58557	3.19527	3.259	4.78556	3.26589	5.76613	1.87964	8.41757	8.04165	1.77027	4.37268	4.58906	2.52078	2.97384	12.938	1.03766	9.62346	10.939	1.06004	1.07461	3.78741	1.91793	4.25712	2.90836	1.7617	1.00619	3.26404	3.15894	3.89072	5.55105	1.02827	3.61076	1.97604
	9.58699	1.63733	6.28969	4.52719	2.55037	1.16169	5.47281	2.01732	16.7942	1.2997	1.95137	3.27044	1.40036	3.87778	4.78521	7.24416	17.6245	6.11894	4.14941	4.90102	1.08323	1.87998	4.47813	1.8966	1.41119	5.41487	1.69199	9.13346	2.09508	1.22933	2.55815	1.39078	3.05136	1.14052	5.16423	3.34705	7.63379	2.08703	15.4828	3.22617	1.04116	9.70479	1.16499	8.3162	1.59092	5.43028	1.36763	6.42591	5.06454
	9.48279	4.10783	5.82746	7.49878	4.80091	1.7434	2.76366	2.27842	19.0421	11.4379	1.40859	2.2429	9.46644	1.34755	5.75859	4.29842	1.14581	13.7263	5.46392	4.9453	5.47685	2.90048	7.11627	3.0694	2.9095	4.52169	4.69318	8.85812	1.74269	3.07727	4.13507	3.06506	12.2874	16.0703	2.92728	1.92249	3.74728	2.53247	7.67059	1.28702	1.1412	2.05295	3.93159	3.68006	9.78399	3.16353	3.13915	1.77877	1.90384
	1.11221	1.63348	2.08143	1.11297	2.14814	3.43124	6.20384	1.81787	7.59357	1.80497	3.83795	1.78343	2.7314	1.80223	8.90639	3.25069	5.75264	2.59582	5.62836	8.45581	1.96065	4.01198	3.07009	4.78783	2.22315	1.03794	5.73838	21.6031	3.78553	3.0162	11.151	1.96048	12.7532	5.55603	5.55575	1.79533	1.7818	3.09359	13.8923	1.6436	1.57466	1.11033	1.12876	1.03247	8.80245	1.7631	7.2531	1.96744	3.72217
	2.24705	1.46069	1.54502	3.5279	2.12415	5.34347	4.65414	1.44435	7.1399	7.52329	3.11111	5.58383	5.22965	13.2773	6.42077	16.5479	3.82999	8.07193	1.62698	2.12817	5.77553	6.20117	5.55759	1.53448	3.33904	1.56369	7.5131	1.44987	9.7204	2.23703	5.53917	1.02817	6.63678	8.77882	9.71487	4.9359	2.92841	1.90227	11.9106	2.10767	4.46093	14.1708	1.56318	5.35246	2.35336	3.0758	3.83159	1.08773	7.18989
	2.40924	2.03188	26.0755	1.29166	1.08676	3.25529	16.8485	2.6105	6.65234	1.42034	2.73126	4.67287	1.62722	10.9614	6.96892	3.75139	3.03723	1.27873	2.63762	1.93802	6.10456	2.0444	3.87316	2.20305	2.41057	2.15479	2.54184	2.26707	1.68619	10.7108	3.84181	1.26825	41.1102	12.3069	1.05575	1.34242	8.75478	1.87736	10.3168	12.6383	6.11747	7.28173	3.44235	4.82795	1.90871	3.65359	8.05203	1.02819	1.60803
	4.55115	1.39283	1.82679	3.29912	1.61906	2.78488	6.05818	1.54226	13.2947	4.12855	4.07224	4.7826	1.86599	1.13114	5.04547	4.32819	4.06516	4.16374	3.02965	10.8433	7.46935	4.43882	2.6173	3.06405	18.5202	1.83713	1.58458	2.44721	2.22174	1.84153	4.06176	1.30849	7.16924	14.194	1.88906	2.36246	6.48137	7.30541	11.0136	3.17282	1.61688	1.47082	2.1441	2.75283	2.17212	12.6773	4.68354	2.16802	2.71277
	5.4611	5.29359	2.08863	2.78793	1.84232	5.61277	4.27156	1.13455	7.17791	6.18783	7.8468	10.2998	28.5821	1.25357	5.11146	2.58952	1.27548	14.5841	2.14808	5.627	5.81768	5.89845	7.22049	4.48272	12.5457	3.18418	10.6813	5.04525	3.78195	2.64681	8.4076	1.53049	6.42966	6.98972	2.20617	2.848	4.95046	1.69461	16.0037	8.67555	1.55061	2.63551	1.24185	2.11544	3.31275	1.67978	9.32643	4.81385	2.10012
	1.51862	2.2449	4.18722	4.12222	4.49693	1.92639	4.36905	3.0208	2.47409	7.38872	2.79653	3.10699	4.15067	1.57469	4.04302	9.52103	10.1726	2.36383	2.9857	5.10681	1.93323	4.22455	3.92095	2.39102	7.86285	2.70216	1.46829	2.9715	4.43966	3.89042	5.95287	1.08288	7.12654	14.9391	2.40408	1.56972	5.08726	3.59968	3.03675	3.07494	8.66087	1.62011	1.33195	6.07091	1.45318	1.24368	2.76797	5.07732	1.42788
	4.35644	1.67405	2.71638	11.1439	2.46088	1.85532	3.86495	1.79818	1.71	6.46365	3.96237	7.68463	6.53338	1.39166	2.31465	2.74117	3.00245	2.31449	2.97433	13.1215	9.1396	1.80127	4.68148	4.35666	2.78591	3.69033	4.9242	8.9028	1.58151	2.8182	5.19551	1.19094	7.82788	1.70328	4.53467	3.85173	2.10616	4.61388	18.6664	3.5321	4.92151	4.4551	3.22056	5.47765	8.88059	3.29935	1.0645	1.004	1.75664
	4.7289	1.58661	3.37845	1.29379	2.45996	1.52118	8.01824	1.00969	24.7415	3.93002	1.17617	9.02344	2.59137	6.86639	2.57202	5.51818	2.01225	3.25656	4.54927	1.03555	5.46772	3.38674	5.85753	1.2552	2.69777	2.05627	4.93712	3.24097	5.71899	1.93511	11.3035	1.2036	7.10232	13.3102	8.12228	5.40851	2.14338	3.71416	10.0027	6.01631	1.21592	2.47701	11.6183	4.9298	2.57408	1.75172	2.95091	1.23956	1.46644
	1.3371	1.70728	4.19608	5.70304	1.21683	2.00278	6.29367	1.05425	2.31858	10.1363	4.77513	3.47313	7.08863	28.1602	7.3428	2.60055	8.6938	4.7437	3.02333	1.68795	5.32442	3.83219	13.8926	3.16828	5.45278	1.23396	1.12851	1.80282	1.02669	6.67464	4.80537	2.38459	2.08618	7.53246	3.27322	1.16182	6.02988	4.53917	12.0943	11.321	1.52502	1.17682	4.70562	8.76857	10.6322	3.60036	7.67024	5.35009	1.31152
	1.81471	18.5982	3.43769	5.03412	1.63428	1.61146	5.00441	2.78612	1.03886	18.8699	6.73448	4.59515	1.32964	1.63941	1.3155	2.36123	13.2305	1.33783	1.67623	1.87941	6.58573	2.96553	7.51247	4.18028	2.61723	1.15455	6.91953	13.2165	1.26812	5.17836	7.73075	7.59641	19.8606	2.63143	8.27772	1.38518	5.2927	1.1841	11.8559	15.329	7.83439	1.32779	1.40504	3.35118	2.46251	18.1986	2.72422	3.35176	3.70254
	3.84771	9.58297	4.88417	21.9926	3.15648	2.15672	2.13831	1.48579	7.98935	2.97101	3.49143	6.16065	9.39082	4.98624	4.15685	4.7186	5.12728	1.06058	3.42117	6.76875	5.05229	7.35979	4.85128	2.48634	6.66795	1.96278	1.9745	2.54826	3.82454	4.01109	4.72289	4.17642	7.43499	3.3422	2.24864	1.13313	5.44255	1.14875	12.3255	8.5366	7.07624	1.86392	8.21601	4.9786	2.28247	8.9631	13.6927	2.24951	3.81189
	2.24564	2.52157	7.06746	3.24584	1.24313	6.6602	6.07142	7.95944	3.72926	3.91214	4.09384	5.30837	5.92353	8.7552	4.34719	6.97176	2.88045	1.12722	4.60661	4.38941	3.99914	5.88445	2.90165	1.62089	1.84376	2.36841	6.60038	14.9022	6.44171	5.65463	9.99826	1.34693	11.6153	3.08335	3.96706	1.09993	2.97627	2.78351	7.00739	6.06889	7.53655	1.19606	3.57907	6.09	6.66014	17.0474	2.41225	3.22263	1.0073
	7.66336	2.59048	1.19959	2.31688	2.4369	2.22815	2.08106	1.14802	9.70169	2.52938	1.42315	1.1346	8.42248	17.8319	9.06641	10.1679	4.88326	1.55158	1.42212	5.76757	8.33941	2.32356	6.21441	1.54338	6.61527	12.127	3.17648	1.00832	1.66737	14.4116	4.00546	5.14219	3.59466	9.30153	6.294	1.5444	8.17616	4.65284	3.75264	1.28394	8.02912	2.7066	11.3607	2.42056	1.81366	2.85739	2.20766	1.04903	1.8022
	1.97784	4.26943	9.33599	2.63446	2.98212	7.3016	1.30667	6.4348	5.76021	4.76113	2.72046	2.07031	10.3424	2.52198	2.39405	13.7384	1.40044	3.47345	1.14224	3.31861	3.24024	9.62649	4.25461	2.19592	2.46072	6.09845	1.37187	12.9939	5.34149	7.66461	5.7997	3.28435	6.91113	3.82701	3.57475	1.53765	5.16508	2.72085	2.63238	3.60196	6.46981	1.49382	6.30157	1.65628	3.81903	1.50431	23.1159	2.35743	2.75202
	2.49363	7.29435	1.66736	4.90303	1.14118	2.33268	6.25693	2.34784	7.8467	1.78133	1.88892	1.54493	9.6828	1.27871	3.57159	6.50525	9.3333	1.7625	1.17053	1.13382	4.77367	2.75484	3.87282	4.82347	8.69811	6.24723	2.71829	5.0416	4.02965	6.47665	6.21602	1.00285	8.35046	4.97182	7.56636	2.55488	8.20178	5.74978	15.7653	8.19153	1.42267	1.34034	7.77245	1.96097	10.3185	1.09869	2.76002	1.0081	1.57439
	2.48609	4.40445	1.18132	1.70409	1.05032	7.85364	9.29154	3.45752	12.6353	9.15277	1.07429	3.79659	1.06498	6.9274	2.93415	2.70588	5.98133	6.0523	2.28246	2.32624	4.83441	3.91244	3.6027	2.44893	8.12827	4.98663	2.41071	11.2995	4.92341	14.0506	6.49553	1.48438	5.54637	6.90821	6.30802	1.13594	2.05105	4.05918	12.3123	2.72219	4.70453	2.62296	2.23105	3.27819	4.16058	12.1406	6.71798	2.55764	2.05876
	2.5752	4.97249	1.94802	1.65471	1.47884	4.67528	2.39666	1.40705	4.08938	6.70158	7.29463	4.7807	5.25345	6.66275	1.15815	2.16161	4.24139	6.25568	2.94478	3.2915	1.27782	7.6999	3.15821	2.62442	7.21854	5.27564	4.18196	5.0167	1.9478	2.96645	1.54615	2.80146	2.83691	9.94651	7.3813	2.32645	5.03118	1.63717	16.7157	1.09778	2.0122	5.3764	2.81197	1.29727	4.68538	3.06772	1.15597	6.18216	1.04585
	2.43423	4.74968	2.01058	1.91972	3.32392	1.18902	2.78625	2.30432	10.8692	4.0449	1.22219	4.5803	3.40498	1.36075	6.21001	10.1916	7.17724	2.41444	1.19074	1.78577	8.87483	2.3688	8.03932	1.41288	12.2453	4.93887	2.93119	7.27644	4.02315	5.13502	1.7314	8.43965	9.23822	3.52954	2.08696	2.57063	3.88747	1.15919	11.1545	3.90212	15.5884	1.75394	6.43325	1.79632	2.06136	1.34537	3.62346	5.25966	13.5912
	6.27817	1.87203	22.2082	6.18439	2.16844	3.13832	12.5341	2.06809	2.54658	7.7979	2.00161	4.86185	21.1063	5.10744	9.00043	9.85299	6.29608	1.34632	2.24533	11.0407	5.71774	9.06443	7.08966	1.09485	14.6802	1.76977	4.40662	5.35427	5.75642	7.2499	4.56186	2.00389	1.84528	1.33001	2.18007	1.04986	9.47021	1.70144	4.36381	2.54064	4.87315	2.85255	5.75972	2.40061	2.0235	8.28105	6.10464	2.75412	1.21619
	6.62942	5.99176	11.1357	21.0903	2.36079	1.74908	1.26395	1.14698	10.2968	2.30964	9.2892	1.66303	10.238	2.05287	1.7562	2.55423	1.79652	2.20038	3.01677	9.45986	3.2252	1.80401	5.1053	1.269	1.25062	1.09071	3.37318	4.0428	5.94876	1.70363	5.64652	1.77646	1.21405	2.26102	3.91252	1.34917	8.79394	1.05918	2.46115	1.85586	2.73019	1.11116	4.87574	4.96247	2.04525	13.052	3.74277	1.18895	1.44471
	1.55257	6.12957	4.23871	1.00533	5.43331	1.58341	4.74125	2.07638	2.29169	3.64995	6.39689	2.26729	5.32487	6.32226	6.83425	6.10932	8.97259	4.47306	5.83524	6.54776	6.50082	2.95819	2.48715	1.00264	1.31697	7.93356	1.65227	1.2031	2.39322	1.71151	14.0332	6.72423	3.37256	6.74088	4.17587	1.03242	5.50104	3.94552	13.5498	8.20765	2.02091	1.08398	2.75526	10.0136	9.75781	5.85536	1.74544	1.44386	2.05175
	4.83828	4.10853	1.29647	2.4739	1.19146	1.9952	4.27285	3.66681	9.25738	9.0682	2.78479	5.64174	5.17993	11.259	7.08048	3.67364	4.80133	4.22535	5.40936	2.69287	1.27103	1.72683	9.517	3.56827	1.97242	4.58552	2.71617	5.12361	2.78911	2.91769	7.76806	3.10394	6.22955	4.5578	3.18791	1.44594	2.35414	3.72099	3.22972	1.2778	2.05007	1.28806	3.05139	2.3429	6.50991	15.3673	6.29333	1.22839	2.63566
	3.31589	6.28592	5.98135	2.61457	1.41287	1.20859	4.86744	3.03012	2.95581	8.75965	1.02217	5.68213	4.99299	6.86351	3.53921	8.06083	7.00219	1.73578	3.3022	7.4141	3.39503	2.60254	2.32735	4.31079	1.19389	5.06202	2.1282	5.00938	1.58151	2.09124	2.38599	3.60311	1.28606	5.33293	1.66622	9.30074	2.0641	1.74923	7.50792	1.46819	4.1567	1.2454	6.61345	1.00064	4.52508	1.70144	4.34859	1.36497	5.49073
	4.44036	1.66881	4.09478	4.53465	1.95164	5.89154	9.72021	11.4662	9.1919	6.15236	1.59828	3.75507	12.6068	2.0405	2.19071	5.24853	9.11935	5.82031	3.25017	9.48652	10.2034	2.7055	1.87269	7.36771	6.05049	1.74464	7.38698	1.0398	10.2707	5.73048	2.29566	2.59529	5.53872	1.42369	5.64769	1.60235	7.27269	2.52082	1.24342	1.78063	3.14471	4.56551	2.1775	7.23365	10.4594	9.20097	2.68534	1.39362	4.21916
	10.1306	2.58768	6.4065	2.02771	3.60392	2.71219	1.11985	13.1307	12.3184	6.87526	2.13073	1.26033	4.91667	3.39135	4.31832	6.76883	4.7253	25.0378	13.4652	8.78036	2.65293	3.25425	2.30176	1.47657	6.47141	2.36087	3.22315	9.68997	1.3876	1.95235	3.04059	1.53954	2.95513	6.70084	1.58558	1.00091	5.9013	5.17861	1.44626	11.2123	1.56877	1.17222	1.01409	4.50077	5.2271	5.25921	4.50369	4.11276	3.44879
	2.25743	6.86656	3.22844	1.09485	19.2655	1.31194	5.15747	2.7628	2.50098	3.25592	1.28792	5.76366	8.28313	13.6639	3.81349	12.8699	5.76738	7.04718	2.94478	1.4447	4.13418	9.84709	6.06342	3.18432	1.31799	4.8675	4.22804	3.25488	6.14805	1.81149	4.19595	1.18913	1.10698	5.23639	2.86027	1.57141	1.51835	3.27354	1.80717	2.13722	2.58639	1.70668	8.02983	9.02318	1.71216	1.38648	7.5421	1.42227	2.41766
	1.70155	3.10011	2.25968	1.68135	5.12565	3.2203	3.35696	3.40105	1.04471	5.36187	6.52038	4.19283	4.61419	2.37399	5.41295	2.47593	18.3695	4.23227	2.56765	2.75633	5.31706	1.89945	1.71052	1.02848	4.6474	2.13971	5.91772	1.90021	4.68513	1.88783	2.05935	3.42361	2.21491	9.14135	2.82677	10.6246	4.52458	4.67694	2.18916	11.7048	6.52994	3.44138	7.48199	2.55762	1.06129	5.06943	3.94736	2.41958	1.68584
	6.24799	15.2463	2.51709	2.4064	6.28205	4.46271	7.56165	2.77161	11.2989	5.81168	2.11524	3.49599	2.7279	5.93601	9.73767	9.61312	4.51075	3.04155	4.14133	2.84225	4.27835	1.72871	1.65952	1.36833	7.18308	1.32343	2.58176	3.45186	10.809	3.47572	8.97448	4.83654	1.72834	2.09871	1.98061	1.87748	1.73249	4.38252	3.4431	12.0372	3.28698	2.93201	10.7435	3.59137	6.57153	6.20079	6.61502	1.94697	1.26876
	3.38708	4.487	2.74074	3.79539	6.42966	4.1531	2.86402	1.19775	5.08089	1.77679	1.22078	5.74918	3.12421	3.79286	4.5029	3.55839	1.52362	4.86189	1.29077	1.84614	3.58578	3.18083	1.83643	1.80128	5.34185	5.31736	2.60741	2.49114	5.84206	1.03922	2.51953	6.14052	2.91785	6.28253	6.9329	1.60235	2.68913	3.10644	1.5411	7.05844	1.53832	4.28155	10.1308	4.99218	1.019	11.9346	4.4436	1.23212	2.63426
	2.94625	9.24368	5.19362	5.15952	6.69489	1.01433	6.59097	3.64506	4.3928	4.5147	1.64289	3.31388	21.0852	4.80074	1.19383	3.96921	1.38924	3.66426	6.19671	29.7738	5.6169	6.8539	6.37353	11.5418	2.76362	1.2028	2.11431	5.12141	5.58628	2.74679	5.97644	8.04765	3.19348	3.40584	1.10757	2.50424	2.43341	2.65538	3.57087	1.95797	7.21876	1.53815	7.88996	4.00596	4.11063	1.6695	5.47717	1.16551	1.41386
	6.11598	11.5589	4.48449	3.10552	1.06046	2.31879	12.4723	3.94035	10.0413	2.21174	1.85089	3.75659	6.51098	3.40619	4.24181	2.14397	9.72408	1.45948	1.57924	4.30613	4.65603	1.10398	1.97572	10.4514	4.06033	1.42798	8.22912	2.80601	4.86692	4.30906	2.74013	3.25993	3.6023	3.19919	1.41494	4.69341	6.73805	2.60357	3.07825	1.7718	1.95182	2.56065	4.39027	1.77892	1.31382	1.68969	1.55058	1.87218	10.8553
	13.3927	5.05994	1.55775	5.9009	8.1216	1.36624	5.05231	4.16415	16.1605	7.04076	2.13261	2.27186	6.06917	9.11259	4.48248	2.541	2.19791	1.24636	10.1845	1.54274	4.80463	4.51872	5.24561	8.69418	8.60136	4.07887	1.96621	1.37225	6.84588	5.06459	1.47349	1.14256	4.46233	2.74512	16.6965	4.1201	4.53039	2.81323	1.66689	1.95106	1.64809	6.1576	15.4494	5.03631	1.25945	5.98568	13.2822	1.01293	2.66861
	6.27204	1.55163	6.79843	9.23093	3.7589	1.08224	2.20231	2.86849	6.59563	6.71492	1.86685	1.28433	5.36269	2.00959	2.19876	1.30524	1.46704	2.45657	4.05595	4.1129	9.23718	7.88941	1.67273	3.31215	1.99319	1.31891	4.36863	5.79729	8.82305	6.34958	4.6954	1.5626	5.32172	8.21606	1.49481	7.63538	2.16465	2.20472	2.28531	2.61242	5.49237	1.16678	1.21445	1.73479	9.70828	5.69348	3.6893	1.5581	1.56247
	4.73032	2.27253	4.62122	7.46893	7.0616	10.0846	6.67587	1.59717	6.50969	4.54168	1.42784	5.35905	12.7048	3.08961	1.77352	2.69871	1.124	4.72893	7.26191	8.27933	1.62572	6.2179	3.14076	6.31919	2.8781	6.60661	8.03531	3.14065	5.42152	11.1743	3.99302	8.29451	2.35449	5.36439	1.94749	3.1777	3.28564	2.52283	2.49869	14.4435	2.43491	3.18921	11.4851	2.23468	9.65632	2.14634	4.3234	2.25696	1.01922
	9.39934	1.26166	1.10327	2.32718	3.06284	5.23741	3.6867	1.13144	2.57932	4.08642	6.71664	9.35947	3.73057	9.06684	5.41646	4.82724	1.69632	14.4643	1.31527	3.21858	8.76191	4.88018	5.32627	10.6473	3.58015	5.13892	10.4992	17.8363	4.35403	2.22324	7.19791	10.7971	4.04522	6.36763	5.3707	2.60945	5.99701	1.64239	2.66597	14.8243	4.14211	8.38076	1.43717	1.67156	7.41291	3.28651	4.71713	1.86473	1.61084
	8.76615	1.64327	4.46512	5.216	2.06558	2.09576	2.2841	1.77331	9.3287	1.29576	5.56911	5.18684	14.6478	1.02438	1.73723	7.30648	4.1907	2.08879	1.7755	4.50112	2.19416	1.39407	6.27711	4.77803	3.95751	3.73909	3.77448	4.45066	5.59906	4.79567	1.09513	5.07934	13.7117	13.4904	1.04874	6.37285	7.13879	4.43594	6.14859	1.60675	2.86427	1.41227	6.43924	8.78936	1.79472	29.902	1.43701	3.79794	1.48326
	5.75483	6.66334	4.91573	2.81067	7.24104	1.22762	5.31364	3.66163	5.56203	1.65221	1.92742	7.72958	3.21663	2.77096	2.6673	7.42724	13.4863	4.43942	5.17925	1.19088	2.47072	5.63381	4.34104	2.31084	4.0345	5.94263	6.09166	2.15064	2.17242	4.24947	7.09841	1.21354	21.4567	9.47027	1.52792	3.62949	7.24465	1.96452	3.17045	13.4597	1.39631	2.22149	4.28915	1.83154	1.45197	5.8572	2.61022	1.24812	2.23611
	5.65394	4.49854	7.1577	3.67497	3.09375	1.5697	9.27038	2.74674	5.08206	6.57034	3.47875	5.96559	2.00042	16.2135	1.0602	5.81485	4.77068	4.56736	3.5404	4.91269	6.53296	8.76069	4.45847	6.60159	11.1284	4.01101	4.03945	6.44973	1.02893	7.06422	2.29304	2.41398	10.2225	4.22744	1.40209	2.99372	3.65302	2.45174	2.54479	13.292	4.95068	3.17624	9.55175	2.12902	1.57965	2.33466	2.77902	3.57987	4.65797
	4.91891	8.64275	1.3795	2.09024	3.58177	2.22887	6.21124	2.62086	4.37467	1.22362	5.13714	4.23931	6.51658	4.79497	6.12195	2.49192	1.85016	10.1305	3.71444	6.79057	2.69479	2.71608	1.15063	11.6095	2.10057	3.43097	9.60774	8.72045	5.52934	2.30155	4.67249	10.2722	6.37199	6.42626	1.26223	7.02718	1.18335	1.58736	4.19192	3.39545	4.97191	1.17306	1.78371	1.39912	19.4145	5.07971	1.8272	1.54433	2.6651
	10.4668	9.80787	1.41272	2.28313	2.52177	1.71066	4.44902	4.98372	6.60732	5.11939	9.77892	1.21841	3.15151	2.59494	2.43962	1.48666	22.9074	2.93185	2.04755	13.8548	2.29323	4.18442	3.2665	2.09303	4.00563	11.0142	2.46914	1.69518	3.82297	3.60131	4.81846	9.51529	2.34429	3.63609	4.02861	8.76906	5.07662	1.28612	6.30467	2.12878	4.4617	1.68033	7.11687	1.22131	3.21568	9.05414	5.21203	10.0623	1.19446
	4.31353	1.16582	19.2953	1.51652	3.84469	1.96923	5.06607	5.75718	3.47963	3.58539	11.0983	10.3577	3.0794	33.1666	2.81145	1.23741	13.4497	6.59894	3.39364	7.64258	5.6744	3.08163	2.80777	3.63953	3.34309	2.66345	1.69276	5.49413	4.27534	5.15472	3.00196	4.67287	8.1392	14.2455	1.09938	8.53332	3.16093	2.48347	14.3289	9.81671	1.77987	1.1948	2.27957	4.61195	3.05699	9.45205	2.20898	5.30766	1.24142
	8.05375	3.87033	2.28792	1.65791	3.21045	2.15745	24.2075	1.03923	8.93117	8.86816	5.28316	1.98954	4.79694	1.12331	9.61745	4.7947	16.075	3.00854	3.4775	1.01903	7.80664	7.51379	3.44748	2.46986	8.19918	4.93636	4.87252	12.6761	3.75572	3.0556	2.57321	1.84564	8.65222	4.78019	1.5696	1.08024	5.38309	1.97979	1.10511	5.57144	5.48597	2.08934	1.14356	4.65312	3.48514	8.55747	14.3215	1.4193	1.54214
	3.09429	3.95778	1.44316	1.17549	1.14718	2.62019	2.10014	3.62019	2.60738	4.79447	5.07986	2.35034	2.52415	3.40001	2.79949	2.79631	2.19909	2.90073	4.96227	4.01485	19.0888	7.78492	2.91911	1.74783	5.99477	8.85338	3.88074	3.71401	3.75818	13.3769	1.51604	2.8738	17.604	5.72622	1.4165	11.4545	2.84237	1.05235	12.7977	11.6296	1.73458	2.19054	2.60436	2.5712	2.25428	7.92058	7.75995	5.4327	2.71066
	2.48138	5.21769	8.64238	3.55738	6.04035	3.45081	5.09957	3.03323	2.56003	7.17351	1.73867	1.02144	4.99439	4.81476	31.0765	2.83877	6.68155	6.05481	3.9635	3.31707	6.43301	4.09	3.13567	3.60702	2.11172	1.44658	4.97338	2.58853	2.98211	1.75879	2.49335	1.01551	2.11199	21.2245	1.44455	5.42201	4.79722	7.18692	3.93112	2.91066	5.30788	3.06793	22.3247	4.03737	1.60543	6.03376	1.31638	1.79291	4.05934
	5.69166	3.5975	19.7111	2.59006	5.67087	2.18703	3.85885	1.96551	2.4928	4.82023	10.2602	1.67294	1.1434	4.24383	1.11237	4.71475	8.03484	8.81786	6.66553	3.25405	2.46541	1.01213	2.54612	4.19141	7.71089	3.20228	37.4349	5.39162	2.8716	1.9824	1.01069	1.14527	3.05487	9.04553	5.09215	11.5788	2.23667	3.99934	9.19522	3.83955	7.28247	1.59168	5.37821	1.73649	1.63241	17.2262	1.57399	4.53475	2.87259
	3.8595	3.3614	7.73064	2.20462	1.71501	4.56597	4.40034	23.5846	13.718	1.93167	7.31107	6.46126	11.9864	3.97589	6.47068	5.91632	3.01424	6.04192	1.99905	8.23681	38.4318	5.68059	1.26738	5.99136	6.08341	7.88481	3.42294	7.73924	3.63579	4.12929	1.20118	1.25107	1.91316	1.9178	8.27499	2.92508	5.10273	6.69729	16.6241	1.20065	2.49888	5.65952	1.51939	1.09909	6.75882	1.98409	5.01363	5.01666	9.04817
	6.68882	2.77692	6.20168	8.38511	2.82436	1.68054	2.86636	3.31195	15.1047	11.2633	10.17	1.82686	4.31591	1.89045	32.4423	5.78673	3.31838	4.7217	4.87234	3.4909	7.36026	3.37564	1.79881	3.31171	11.3711	2.67853	21.5876	6.62181	2.99826	2.71871	1.09972	1.22214	2.26112	8.59933	1.1473	5.36068	3.04539	3.12813	17.7101	4.06026	3.65544	1.2086	6.51579	2.00426	2.14111	2.29061	9.47093	1.26003	5.51106
	2.56719	3.39463	2.68871	3.00249	2.62371	4.25798	3.57791	3.01095	11.3971	13.1055	1.72506	4.31131	5.35848	3.61725	5.96564	1.84619	5.19034	2.14851	1.10713	8.50385	7.98974	7.0738	2.78964	7.20513	4.00766	6.34172	14.2722	7.49173	2.75683	5.15275	2.8429	1.19048	4.27401	7.43235	1.66778	10.1948	2.61855	3.06226	4.04967	1.5154	3.79566	6.17056	1.62493	6.08915	1.38954	1.82404	12.1421	3.55196	9.5739
	3.14427	1.41207	8.27702	1.85436	2.37693	4.2771	2.46287	8.22314	7.08495	2.17112	3.15243	6.04979	10.4754	1.07219	3.4196	1.07695	9.31621	4.02103	8.16772	6.32104	8.7967	6.53855	3.7825	1.67657	2.28444	3.14648	1.03421	3.88097	7.60155	5.2946	2.34475	10.0475	3.15173	1.75691	7.77478	4.75249	3.5926	5.09427	6.82496	2.81662	4.24548	1.10698	1.55342	6.94	4.6443	1.41658	2.67031	6.15723	3.69343
	2.05139	2.73144	20.5309	42.1998	2.96505	3.69269	2.12429	4.0968	7.86307	3.40656	2.06547	5.63946	3.58773	10.4944	9.62054	4.42304	4.51488	4.8971	2.50677	11.384	3.79747	10.076	6.94478	8.02604	12.2104	6.56439	8.42967	12.3407	5.27917	6.07475	2.85468	1.04761	7.05325	5.43519	6.19933	2.64546	8.27525	2.63851	8.561	13.2947	2.88602	5.17608	4.09919	3.35839	1.64852	5.11459	6.87706	4.59169	5.72065
	2.16596	3.67061	3.97908	4.77515	4.70912	3.66483	6.43245	3.38499	10.2097	6.51093	4.40326	4.97348	10.1295	3.53028	6.13433	5.73986	4.84672	1.75339	5.02137	11.5263	5.68855	5.82367	3.83808	5.20385	1.40005	4.10249	5.8859	13.0664	3.11281	4.07413	1.15143	1.54994	4.99383	4.63432	2.18942	1.24115	2.1748	7.68819	16.0729	2.10728	3.89417	3.11351	10.6002	1.94272	9.03163	2.65071	1.35305	4.66574	5.72485
	3.92456	1.51805	1.38504	28.8601	1.69056	2.72923	6.54164	5.65616	1.84212	1.91591	3.60694	3.04871	9.42373	11.3468	7.20773	4.92925	26.8299	4.32249	10.8781	3.14256	15.4025	6.84792	2.31362	15.9862	1.58189	12.5402	38.7044	7.49979	2.18026	5.78416	1.2542	1.42153	5.19108	13.2229	9.96069	7.31412	5.00556	3.95797	7.85104	1.49506	1.92981	1.65106	3.31035	1.28624	6.15749	1.41915	2.21827	3.60406	10.631
	5.3305	1.30818	4.41696	1.10587	7.61743	7.8034	7.81377	6.41667	2.39341	1.11057	6.59268	4.93653	9.51686	2.75282	4.30348	7.84247	35.7141	4.48846	4.65309	1.33057	3.08457	2.92694	3.48323	2.18969	3.75794	8.92073	10.555	5.26274	4.19218	2.31485	1.08597	2.82814	3.64277	5.81059	8.49199	4.63659	2.97433	2.50034	7.07325	2.05892	2.32719	3.96204	2.73447	1.15256	1.41048	2.1981	13.8553	4.7811	4.27243
	8.65912	1.01996	5.07848	1.49095	4.0066	5.6786	1.46037	4.20197	4.77864	3.2541	5.27894	9.409	9.11285	2.5698	4.08117	6.80192	7.65702	3.76202	8.31296	6.06832	5.70565	9.3808	5.87685	8.29686	1.79413	6.19898	7.55128	3.45992	5.36054	2.57638	3.24024	3.6958	3.48026	6.11593	4.76062	6.14555	2.94968	3.90013	6.47261	1.76758	2.13477	1.60799	4.72106	10.2008	3.55965	2.30088	19.557	5.39437	5.1816
	5.4413	5.46778	1.4105	2.88704	1.63152	1.41756	4.66492	21.7652	2.5232	5.5595	11.1119	2.6879	40.1897	11.778	7.97364	1.9052	28.2375	1.53618	2.22007	5.05965	2.94688	6.12809	9.19943	3.18654	9.06585	8.07028	1.03054	4.72966	11.158	4.51247	3.32795	1.3406	3.00261	5.75482	2.64522	1.31598	3.62015	9.05223	1.3804	17.5123	4.06509	2.59285	12.0244	5.05414	2.12781	6.4482	1.53202	2.10587	13.3872
	3.24894	3.77379	7.91387	2.95667	1.71547	4.45802	5.44762	9.97728	5.35624	2.0811	8.2182	5.10797	2.42683	7.01026	2.44231	4.47101	11.312	9.3667	3.13599	2.90042	1.26101	3.06268	5.26222	8.40376	8.13232	4.36235	7.14458	3.16116	18.8252	5.69009	6.15187	6.12605	4.06115	1.7805	3.90706	1.39081	2.10471	5.99077	1.84142	1.88427	1.50736	3.06375	1.81678	5.09742	2.98208	1.14824	1.55544	7.98736	2.10292
	3.34889	4.7245	5.05467	21.1461	2.78839	2.76341	2.7921	4.88943	12.143	5.08514	12.9971	2.10422	1.9311	1.12866	8.07015	3.79275	48.4371	5.45442	4.42423	6.07801	8.61774	8.60532	1.1852	5.88446	1.1093	1.44457	6.03131	3.59099	4.57999	5.45664	1.33537	1.24972	6.59185	16.7796	2.00047	1.81671	3.65979	3.05543	2.49474	1.54841	1.71897	1.41185	4.65081	2.36624	2.88139	12.3226	1.16879	3.99889	2.22139
	8.43046	9.02262	2.08309	6.11405	6.41306	1.45967	4.28661	18.3051	2.86403	10.952	1.4147	3.0689	2.54235	4.30031	10.4036	4.3337	3.56239	3.43699	3.55404	4.55576	1.27192	10.7015	1.12995	5.45997	6.1295	2.89366	1.27372	1.71129	7.16846	6.78792	14.2374	6.9494	3.4825	2.64716	4.23625	8.45512	1.26215	9.93428	2.65148	1.70617	2.75578	1.16511	3.41777	3.22684	1.13701	1.51679	3.02912	7.32832	2.60342
	4.30882	1.15078	5.65087	4.72648	1.09552	1.31393	3.56727	3.23423	1.40249	6.36575	4.22531	1.65846	6.70423	1.45844	5.97884	3.16136	9.22367	4.68146	2.29333	1.36825	5.71007	2.2177	3.23396	4.44575	4.54508	1.66321	14.9736	16.7929	4.06462	3.7269	4.45516	2.57856	3.78234	7.69335	2.9452	6.35147	2.78388	2.28344	6.36658	2.84886	1.59999	11.6607	1.90216	2.60303	5.66329	2.44368	1.42022	2.9547	2.35317
	2.1273	1.75485	3.59213	3.87923	9.89888	2.75133	7.56711	6.98239	1.40541	1.35214	1.37573	1.87906	1.97311	1.6695	1.10144	5.06766	10.2469	5.77159	4.4889	10.3932	4.50832	2.38059	4.11718	1.13671	1.82806	1.49081	18.2864	5.84488	3.19373	2.21043	7.645	1.15567	8.36034	6.38193	3.92304	7.09076	3.19911	8.16416	13.2344	12.4556	3.82073	1.2797	1.59941	4.04204	15.055	1.13539	2.21031	1.36273	3.10041
	1.04432	7.95613	1.81793	5.24406	2.14722	2.72093	4.62597	5.62145	9.1311	7.58816	2.18473	3.7543	5.71838	4.24589	9.95153	4.78643	4.20662	3.17043	2.38123	4.41144	3.26029	16.8096	5.39169	1.45074	1.61228	10.1602	3.65781	3.7389	4.35784	2.17743	2.83766	2.55324	10.6744	1.95927	2.07683	5.11538	1.06444	3.22895	14.9157	2.63621	2.64575	4.05028	4.83478	1.27393	4.37928	4.82496	1.51611	1.53168	6.77912
	14.1297	1.27041	1.28871	3.21173	27.6601	5.39253	4.06877	33.722	7.79292	3.95457	4.11403	1.17613	5.49432	1.5483	5.23169	1.88148	15.9624	1.62608	1.52922	3.18773	1.56675	1.15555	5.13004	3.94777	2.31737	4.65087	4.23557	3.14505	4.389	1.53962	4.45647	3.75774	7.29288	7.4538	7.46857	10.619	3.48238	5.27903	8.39174	2.11995	10.2309	1.81834	3.60585	8.48722	6.83574	7.83064	1.45557	8.65533	7.88595
	4.26214	1.37219	2.63833	1.2842	44.7143	3.4629	5.85448	5.76599	3.41123	1.54036	1.86545	6.90398	3.00518	11.0558	3.59572	6.02164	4.79131	1.78482	1.54993	4.26162	4.57643	1.54841	1.60156	7.72895	1.901	8.82373	18.8261	2.46698	1.2661	3.05954	1.52324	1.20088	26.2696	3.82415	3.65306	1.84822	1.86494	11.3365	2.25764	1.03906	1.17012	2.61501	1.05346	7.9661	2.50238	1.84497	1.4074	4.09304	6.05571
	4.09807	1.53834	3.96912	6.27959	5.06568	5.40326	3.92	4.01132	9.93904	1.99077	11.4875	3.62591	4.62259	4.72283	6.33849	1.66477	13.758	1.27685	2.19001	4.04569	2.38846	1.96979	4.65843	6.96728	2.72462	13.3318	30.5856	4.81313	8.36261	2.07794	11.9208	1.01777	14.4873	7.95506	2.69431	1.79027	2.05878	1.06802	1.50356	14.9594	1.53704	1.06934	3.0243	1.829	6.18528	8.94511	2.09233	3.79087	10.9226
	3.96936	1.81886	46.0772	1.02522	8.0764	12.4608	7.04976	7.89262	1.65095	4.90146	1.86685	3.80955	7.26648	6.01886	1.25776	6.701	13.4721	5.35604	6.92798	4.2224	1.11153	7.09959	1.1469	5.83056	1.94	3.32894	4.68527	2.57535	6.67283	6.12302	11.875	6.47329	11.5388	2.82235	3.49177	5.15589	10.1155	2.02919	9.08919	11.9831	2.33896	5.66496	4.12187	1.20561	3.53186	8.56702	1.13564	2.5554	1.24423
	2.09335	3.37434	25.1023	7.22844	6.68013	2.14229	7.05314	7.44605	9.15566	2.60637	1.58091	1.4573	4.74723	2.09862	3.82112	6.60836	4.00091	12.0578	4.6152	4.28101	6.52647	8.93057	13.4435	7.55479	2.14768	5.02382	3.71856	8.65529	10.4965	1.14314	5.66944	1.18054	8.97374	3.04545	2.91053	8.27002	4.9171	1.97657	15.5625	5.86891	8.29011	9.9532	3.73911	4.56782	8.77466	1.57589	3.3	1.8372	2.59921
	2.93588	4.69931	5.06685	3.4064	5.3858	5.89803	1.23578	20.1146	5.22997	9.11337	2.38803	1.77695	4.81865	31.7263	9.72798	1.28539	1.04149	11.2524	9.48754	4.83712	4.28955	2.64403	10.1947	6.02922	1.9167	11.733	14.1399	1.16429	2.25312	3.13933	3.20947	1.58656	1.44921	4.68651	2.58289	3.42638	1.08039	1.51587	1.58523	1.17186	2.43875	1.07311	6.21273	1.06557	6.43096	17.5587	2.11	1.98902	4.98252
	5.52192	3.24073	6.72092	6.24229	1.88707	6.11087	2.35407	3.49845	15.4707	4.80477	2.58665	6.24028	6.49418	1.00088	2.43674	6.90227	1.69927	2.24061	5.7726	1.32484	9.93801	2.34371	2.27889	2.31352	2.4131	6.50056	6.77818	3.24024	2.28518	1.89029	1.11346	2.14721	1.91698	4.19812	3.49918	4.17636	4.64157	4.32709	2.57443	6.54179	2.97813	7.43145	8.6936	1.07745	3.64986	8.91501	2.60845	1.91869	6.38937
	1.92268	2.73389	4.16674	6.68954	3.43693	2.20903	1.02625	4.91534	5.65206	4.27101	4.00604	1.01611	2.56827	1.57345	17.5707	1.09184	4.56203	2.0671	4.02084	4.12435	7.99298	1.93804	1.72713	6.24659	1.33977	3.43851	8.70042	7.4683	6.18683	6.22103	9.84312	2.09838	1.20226	13.6105	5.91961	5.8271	5.64075	3.67439	2.33602	1.28932	5.97725	10.0933	2.4103	1.21282	3.44566	6.16151	2.27748	8.68324	3.34995
	1.49081	1.05109	1.16804	3.11369	7.96892	1.89978	1.87477	3.71655	4.58572	4.04217	5.29725	4.88699	2.00182	3.61396	7.45024	10.7992	1.96981	3.01892	5.09539	6.40587	1.46238	13.5582	4.78943	3.33086	5.13519	1.68633	5.0295	5.68452	6.5928	2.92508	5.89658	5.61513	3.60836	8.76093	4.70686	4.84532	4.37135	2.42724	1.44165	1.18798	2.2645	1.05638	1.76701	1.42373	5.42163	2.82875	4.068	1.1856	1.27647
	1.49458	1.18471	9.31165	9.02276	4.93468	2.60784	2.26411	5.97476	10.5125	3.51235	1.80206	4.11815	4.81024	14.0069	3.26823	1.97854	10.5257	6.16357	5.41845	3.72511	6.20539	2.00274	5.74077	1.96787	1.10626	6.6428	10.4769	5.39967	1.80792	1.18106	4.3753	2.66853	6.62818	3.07691	1.96619	4.14148	1.36898	1.36524	9.3197	3.81691	1.99915	6.03005	13.1916	8.04546	3.00866	8.4066	5.37951	7.03173	7.21372
	1.57897	1.14448	1.8982	3.96271	7.06299	4.64786	2.01056	10.5316	10.5383	10.4794	3.6661	9.78123	2.60187	3.59211	4.62292	2.18918	5.92416	5.26676	3.60809	12.7791	1.93736	12.0914	2.52698	4.81055	2.79148	5.43698	8.80706	1.95806	5.00882	7.30802	8.65438	1.76832	4.13285	2.23099	2.35577	6.17424	2.12259	1.7171	3.13225	10.8289	1.56621	12.4444	3.44014	1.56462	5.03337	7.94994	1.39768	2.06085	1.74402
	1.82178	21.1006	4.74025	2.70978	3.49598	2.51432	4.76073	20.2177	1.18969	1.90197	5.19818	2.34577	1.72595	2.2462	2.66482	7.69193	1.33324	4.19895	1.42389	2.30641	1.40489	1.01572	8.56972	3.98785	9.95582	3.50134	3.67478	6.64671	3.97899	5.92305	2.21907	1.67654	2.90128	11.1121	3.16881	12.5831	1.09731	5.80922	2.39134	1.07782	1.06495	1.49507	4.3531	1.75601	2.37995	3.17491	3.19041	1.49372	1.74332
	1.11645	1.90106	3.86615	1.16484	2.76855	3.30164	1.65835	1.16925	7.70406	1.91954	2.24248	6.7089	2.47374	7.95466	3.71058	1.56441	2.03877	3.09593	1.48956	1.95344	6.05945	4.73266	4.0316	3.81592	7.98391	8.19242	10.6871	6.02575	5.61228	2.00308	11.4292	1.55807	5.23027	14.5801	6.25893	10.7703	6.06372	1.6203	1.9514	4.36311	1.11101	1.12162	1.87349	1.39318	8.41983	3.42343	1.66767	1.97377	1.71879
	1.35879	1.1144	6.34173	1.49734	6.33971	3.19414	5.35311	4.2802	8.86686	1.22453	1.08321	8.3346	1.52639	2.13531	1.19548	1.40505	6.89079	5.27871	3.49316	2.81295	29.5136	6.73523	4.65538	3.49567	2.10159	3.51089	1.68389	36.5082	4.94561	9.0614	5.58041	2.43071	5.06872	2.36971	6.1444	2.89583	19.3412	3.14902	1.33892	1.86393	2.84917	3.18628	5.51683	2.26099	14.7819	13.139	1.1763	1.6515	5.52858
	1.39133	1.22494	7.28723	4.08705	12.0558	1.03074	3.56675	5.8007	7.33107	4.50804	11.7603	1.61998	5.0476	1.43536	6.69134	1.00967	2.04938	2.69043	3.52196	3.47658	7.541	2.44888	3.45561	11.0959	22.3531	5.80944	3.92644	3.25928	3.99244	1.28893	5.22104	1.79681	8.97533	2.73297	2.93624	11.7634	3.49447	4.58777	1.43638	41.591	3.03289	9.0641	2.30414	1.23574	2.61033	12.8153	1.87536	3.07638	2.48916
	1.5521	1.56912	4.53708	2.33926	7.59576	3.35603	1.29251	8.86553	11.6397	12.2056	1.26069	3.79697	14.6569	11.7945	5.75818	2.7533	1.67157	4.75659	6.32275	2.38	8.71857	3.28157	2.55104	1.39773	10.0485	2.22063	5.26437	3.48262	5.1552	7.28142	6.95244	1.03178	3.6262	1.8134	5.58107	6.95179	6.06227	2.45856	2.8102	5.35419	1.07161	2.35573	10.024	1.44877	6.64081	2.43744	1.28633	2.46721	1.55196
	7.28996	1.03081	7.13112	4.98083	2.58035	2.33304	7.02886	12.3215	6.80843	1.36881	4.34363	1.30719	8.38957	5.32014	2.32538	4.1964	1.58492	3.81231	5.67358	1.77013	1.42877	5.8474	6.42216	2.05384	4.55015	5.7833	1.44515	2.93342	3.44637	7.67298	3.69518	2.16846	7.08416	5.73265	1.55636	1.82403	9.82695	3.49927	44.4535	1.52308	1.45184	5.63652	2.07826	3.21114	10.5098	5.65897	1.36056	4.34236	1.71668
	1.91231	1.71218	1.76203	3.17834	1.56925	2.51675	5.9007	6.55913	7.8315	1.14482	1.01701	1.28242	4.80184	2.29855	1.06432	3.69515	3.3838	2.135	2.1933	5.83389	2.35544	2.88546	4.05651	4.13885	1.49325	3.67123	2.81992	9.67898	7.34085	1.76963	5.46651	1.40751	5.51387	1.09118	2.50381	3.23903	3.85073	1.14915	6.62146	2.36023	1.67726	4.88585	1.98659	3.34863	1.06854	9.86209	2.82144	5.34227	2.03633
	1.53984	6.70601	3.35631	3.25116	5.26034	2.50052	7.35471	5.19302	6.4676	3.08103	1.44944	3.15653	1.24702	1.56892	3.60706	2.20077	2.24919	1.75118	1.07303	3.4854	27.966	5.7704	4.36053	8.22871	6.70492	7.40178	8.73379	11.0381	6.21328	7.27059	3.24286	1.77872	8.80199	6.76234	4.85295	1.58154	9.16422	3.5547	2.82535	1.2494	1.45005	4.70895	2.46228	3.9334	6.35807	10.2912	1.34333	1.49782	3.53851
	2.83781	4.8805	3.42772	9.2693	1.20945	2.20497	15.8333	3.52798	2.54366	1.85801	2.15139	1.96668	2.3141	2.37894	4.96896	3.69515	3.21877	18.5011	2.03972	4.19442	1.05993	2.12192	2.82709	1.7946	1.06877	5.60034	7.42343	5.38796	2.99579	6.79531	3.9616	1.5201	5.51004	4.47057	1.05069	1.89492	2.90618	6.42577	11.6834	1.16572	2.18211	2.33482	2.92317	1.31849	2.54588	4.79485	14.6551	1.73895	9.45613
	2.25978	3.29494	4.47398	4.18225	11.0913	1.0486	8.84015	8.26925	5.63277	5.00543	2.22417	1.30033	3.12981	5.80657	4.43195	1.501	5.65775	2.02403	6.78652	7.08624	2.49342	5.07482	4.45492	3.94242	1.086	3.73658	2.51099	22.9124	6.01198	2.31534	5.66354	2.67125	2.77605	1.50163	1.11419	3.32961	2.50206	6.04379	15.5658	1.67815	5.01234	2.59118	1.50553	2.03948	6.63195	2.31373	1.16746	2.40767	5.73607
	36.6827	7.11735	5.38959	4.79966	4.26814	1.91097	2.15856	5.27435	6.69384	3.90183	3.80884	2.84678	2.47584	1.36033	5.09599	1.62011	6.61554	3.96697	1.71387	1.64961	5.00394	14.2161	2.09926	17.1933	1.97394	4.57949	1.10325	5.6999	3.24686	1.85976	2.25311	10.1284	5.21211	12.2032	1.6892	1.15619	7.69034	3.20766	11.5879	5.65703	4.22194	1.21822	4.84738	4.49695	1.97476	11.9207	1.07776	1.77468	1.78818
	1.82367	7.78718	2.93892	1.37834	9.58061	6.34328	15.546	1.56609	2.91431	9.75958	1.26773	7.36916	10.6736	4.46066	5.01103	4.29014	2.14427	1.12911	3.01146	10.4051	7.45609	4.96555	4.4983	6.36106	5.8575	4.01202	5.09333	7.40386	2.85972	3.01127	3.98582	2.18836	1.23253	8.84175	2.49446	2.23868	6.15653	5.92289	8.37726	1.45591	6.10212	3.63166	2.59806	3.94274	2.55072	6.31789	2.92661	4.76696	1.18465
	7.63885	13.9084	18.4345	1.20995	3.51027	1.23826	8.86728	3.94191	12.7317	7.25323	3.33226	5.37962	12.9267	2.34225	3.33917	1.79767	3.86063	8.18038	2.93442	6.4138	1.32646	4.52163	7.46298	6.14948	1.1949	2.72276	17.8245	7.88569	1.18473	4.77893	9.98255	3.88615	1.44698	4.1681	2.6799	9.42677	4.87311	2.94257	5.49725	2.06276	4.20813	1.32779	1.12813	1.40166	4.47554	6.18794	5.21203	5.74715	2.86979
	3.70768	3.26031	7.89672	3.12079	30.8203	8.35047	1.66511	3.75748	3.62812	6.07598	1.36305	8.45918	4.72902	2.42428	1.20352	2.06787	3.30011	2.27802	5.03754	2.62193	12.6543	1.65188	4.06448	7.47238	3.1729	8.93833	2.8068	8.36019	2.92563	1.21456	8.61903	1.7846	3.98054	5.07265	2.08735	5.68926	4.24373	3.46192	6.55164	8.01228	2.74145	1.23913	2.42007	1.20858	10.111	3.85916	9.78908	3.85562	9.52553
	2.36209	29.6968	9.21865	4.83164	2.41706	8.01155	6.1127	2.42917	3.8567	3.58509	2.95851	2.23986	8.82368	9.88963	4.9836	1.13981	2.43839	1.14294	7.13081	2.78299	10.7798	2.18202	1.06539	3.92639	2.15731	1.33852	3.57856	4.0882	1.08856	2.49954	1.57495	1.32161	7.56309	8.54785	1.09627	1.34692	5.05535	1.97577	5.58352	2.87611	1.49994	2.97049	9.8715	1.26035	5.03176	4.26002	10.2504	5.65746	1.50429
	1.16785	1.4348	1.61588	2.8604	13.7643	1.135	5.02154	1.18428	9.42809	11.8237	3.08294	4.36846	11.7259	7.32437	1.23693	3.70948	4.60093	4.91879	3.52954	18.8274	4.01093	1.11559	2.93012	8.29463	1.47805	1.36364	1.44168	2.91073	2.85635	1.14166	4.86101	1.30171	1.44889	1.51593	1.05341	1.77733	6.83377	5.43286	6.82628	7.90519	5.1518	2.60581	1.17822	1.35074	6.02055	8.84306	3.75823	2.04038	2.63776
	1.21169	3.43241	1.73545	5.96307	7.96247	2.1229	12.0672	2.63329	5.12532	11.7307	1.57622	1.6657	4.95028	1.639	1.06453	3.93612	7.59749	1.80651	1.67851	11.5636	7.54129	1.34797	28.0963	6.42253	1.01356	3.14146	6.48159	20.4154	3.6127	2.19566	1.44469	1.22575	3.71988	1.29426	1.27508	4.79469	4.105	1.15598	13.4385	1.68506	4.61855	3.30337	1.27651	7.6508	6.145	2.29428	1.2417	6.63951	6.03819
	6.22678	3.47018	5.12664	1.19894	1.98255	1.82953	8.9797	2.912	1.55683	1.08086	1.28088	4.54372	6.32053	6.61659	1.21837	3.88815	3.985	12.8914	2.79726	4.11466	7.95436	7.70997	4.20208	9.50261	1.61127	2.89416	6.32597	4.36133	6.24422	21.2257	1.14947	1.27458	6.64889	13.0849	1.11964	1.32329	6.4195	1.5962	3.2317	10.7763	1.6504	1.23035	4.05823	1.05538	6.05559	8.5549	8.22083	5.63997	2.88521
	3.0231	12.3064	8.561	1.27709	2.83497	2.08755	3.10095	3.68961	5.51818	7.14017	7.1519	2.74505	5.89062	1.7235	2.81392	5.25625	3.48695	1.45696	5.18733	5.90241	4.24946	1.384	1.43752	6.64969	2.599	2.83234	17.4631	5.13385	5.36099	7.30704	8.61314	2.09477	1.056	1.31929	2.25019	1.00991	7.14411	7.05839	1.38831	3.97773	8.08976	2.97927	1.01787	5.31385	2.0384	5.68613	1.0888	1.67123	1.31292
	4.21452	10.6736	13.4125	7.10517	2.0199	1.14176	3.08718	12.0065	2.13618	4.68808	4.5892	1.86153	3.42248	3.4705	1.73784	4.64802	4.89387	3.50174	1.31653	4.35195	8.87218	11.7322	6.30388	1.34873	5.10682	3.15855	4.20587	1.80062	5.67998	3.59491	1.64041	1.22259	8.9355	2.96536	8.89481	2.38046	4.1021	3.99974	7.83853	8.99491	4.58222	1.39888	3.74352	6.21561	2.57891	3.7505	2.22268	1.9399	1.13838
	1.01509	2.13017	3.74049	1.92043	8.30934	1.79535	3.26647	10.6627	4.0847	10.6437	1.58655	3.30473	9.46784	18.82	1.05648	2.82885	2.26097	6.64043	3.33554	9.26266	10.4599	3.57267	2.30278	8.96856	9.47817	1.60692	32.6567	1.07276	7.62644	3.01373	4.36548	1.63539	5.27679	17.9137	1.55207	1.50671	9.82937	6.79731	5.3787	3.44381	6.62615	3.89722	1.24374	2.47699	1.9659	4.03279	1.65707	3.1616	1.3662
	4.47431	8.75783	1.44926	7.71547	4.78384	3.44261	2.81404	3.70204	11.3152	3.85303	4.9512	5.01463	3.03668	2.33524	4.72108	3.86003	1.95036	1.60973	5.59426	1.552	5.35538	2.307	2.80387	4.55666	16.0195	1.99797	6.6752	1.97197	17.4177	8.19308	3.84574	1.62906	2.43797	18.8233	1.70634	3.16983	4.74308	7.04272	4.74316	2.23932	1.3633	4.10799	4.04847	11.9839	2.62322	2.74469	4.02867	4.72305	1.15661
	2.65488	4.55101	5.59828	4.91618	1.53926	1.214	4.94547	3.69013	1.31772	1.17664	1.71754	1.11059	5.13793	19.6177	1.40727	5.37426	1.30554	3.39896	3.56692	3.63081	1.01099	2.52366	2.9774	4.72636	13.5729	8.70611	10.4076	10.5489	2.51853	8.76293	3.73904	1.82077	4.91895	2.65503	2.83066	2.27638	7.59125	1.36243	5.91611	8.14432	2.26834	1.53564	1.16184	10.0905	1.0186	1.08987	1.96683	2.10438	2.1611
	5.26544	1.31273	3.79861	2.9929	2.88295	10.0147	4.43773	2.06809	7.45501	1.49005	5.99544	4.91138	6.82116	10.4338	6.95923	2.88895	3.45453	1.9992	3.93015	7.87811	2.62668	2.02528	9.34958	3.65023	16.2089	1.03743	10.5785	1.02077	2.4997	1.03577	2.87367	2.88194	5.86884	1.52308	1.34482	1.14325	1.77986	4.27809	10.0455	1.92381	2.12863	1.37086	3.66035	4.49144	5.26053	2.45983	1.75207	5.26375	5.9008
	3.62187	1.1966	4.6251	14.8807	2.15275	1.54517	3.79134	3.18191	1.74508	5.6574	27.292	1.96554	3.23974	1.04087	1.19321	4.85371	1.46822	3.83966	3.51312	9.63502	6.75231	1.28274	2.21364	3.03822	8.33088	2.67652	5.96863	1.12109	10.3469	5.59602	5.08947	1.08966	7.44168	2.91602	3.28296	1.74189	3.53217	2.32039	5.436	2.32185	3.62345	1.6979	2.35864	6.17487	16.8131	2.65806	1.24523	3.21965	7.41139
	5.65535	4.07496	3.37015	3.2771	1.81695	2.6909	4.47849	2.7799	8.46172	5.54737	4.6277	5.49849	3.00098	3.02242	5.4144	8.88854	4.77776	8.9722	9.05686	33.9742	15.1436	4.20645	4.7674	2.9674	16.4738	1.52951	7.5588	3.4255	8.26016	1.59774	6.18264	1.71678	1.31155	5.75267	1.34404	1.28335	1.5227	1.58977	2.4572	4.66865	1.11331	4.05279	1.99478	5.26547	3.28858	4.69721	4.66675	2.22868	3.86307
	4.84583	2.36172	3.26055	1.78153	1.77912	2.96254	2.14389	3.44664	8.73181	3.3417	3.40926	3.96385	4.23749	1.46215	8.07737	7.12892	7.6529	6.83595	2.55022	3.06655	4.20258	3.56686	7.27794	2.45472	9.60024	6.57394	18.0285	7.47782	3.65485	7.22035	3.79533	3.25586	4.1456	8.45776	1.8314	8.85796	6.80235	4.4741	5.68494	2.21591	4.11959	1.5808	1.00936	11.9237	3.15728	3.84778	2.18114	2.60452	4.34534
	1.46252	2.52577	21.7598	3.54957	1.38012	2.61235	3.17637	5.73542	2.20751	1.19483	1.74243	5.7027	3.76767	1.09775	1.5541	14.5153	7.52441	2.45028	4.46515	6.57331	11.1112	12.8603	3.43104	1.98168	2.38626	1.63356	6.70259	1.51871	2.7232	5.16802	5.31137	4.98847	7.23775	1.852	1.23963	5.13338	13.5153	2.19548	3.84814	4.52624	4.37522	1.70375	2.15198	13.299	8.9986	2.05898	4.43299	5.52387	2.40224
	2.76096	8.29682	2.24474	13.2388	2.71182	4.04965	11.1131	4.33045	2.05492	7.21474	4.17836	2.08022	2.7062	1.19462	7.94662	3.31356	36.8794	4.9169	2.75684	1.99927	1.40106	5.93413	3.11025	3.73886	16.4703	5.64206	2.86852	1.30635	4.77771	9.41995	3.69911	5.20911	1.74204	8.01656	2.56302	3.04099	5.19892	17.8406	3.94692	1.27397	1.20466	1.55655	1.08906	1.53576	1.47976	3.69801	1.00927	1.23658	2.0139
	6.59312	4.91968	5.74664	5.85401	1.06323	3.74185	3.92052	4.94746	1.43114	7.03621	3.87034	5.21465	5.53913	23.0721	2.95704	4.40484	9.98107	2.24061	3.8521	5.47563	4.07816	2.64335	1.87388	3.47518	5.48925	2.02461	13.4117	20.2235	11.1096	2.11193	6.62841	7.13432	2.32581	4.46556	1.36274	2.43448	5.25548	3.73063	5.37541	1.30467	3.24117	1.62262	8.1486	4.33824	2.37712	9.11837	1.04683	13.9477	8.02264
	6.86139	2.29946	2.63667	2.62487	3.49598	3.65157	22.8241	2.74001	8.38923	6.75402	4.50891	18.3479	2.43313	3.02654	11.5764	1.14643	9.75061	1.37775	1.88134	1.81463	3.36908	1.00018	6.84209	2.1251	9.13575	4.00046	16.9461	22.3222	5.17291	8.6728	3.8752	4.12442	2.54217	5.09339	1.03082	5.97113	5.36908	1.34275	3.23631	1.04481	2.38988	1.69832	1.00337	6.50375	2.40048	2.84894	4.86427	1.06391	2.62935
	2.98303	1.10986	29.4894	1.85969	2.2081	2.4814	8.63762	5.9069	2.54015	5.70832	4.94651	4.07129	12.181	2.30639	1.99563	2.90329	10.8157	1.05115	4.00568	1.50287	7.22994	1.55063	3.02705	2.36786	5.0972	2.37997	2.34939	13.5622	5.63291	8.52455	7.23064	8.22534	8.4776	5.41732	1.59259	2.50987	8.02195	6.53503	4.46787	1.99175	1.31443	4.63033	5.18132	7.7692	21.4417	1.4665	4.24254	3.84408	8.36051
	4.87459	4.68218	6.97003	2.31226	4.00014	2.65897	7.37834	1.82719	3.0172	7.39266	8.15575	6.0155	2.87634	2.66172	1.81353	5.48785	5.88231	4.7085	6.2735	6.48562	1.73599	4.31691	5.42592	1.41332	7.47282	2.48954	4.70745	16.1302	3.9494	7.56709	2.40956	5.51928	5.13468	9.19712	1.80062	1.44144	3.1851	3.97604	4.73789	2.37251	7.03555	2.63467	1.50837	4.95399	3.68007	14.2109	1.51434	1.50972	5.07505
	9.91749	1.51071	4.29406	5.36804	2.2773	2.20101	4.61753	4.93243	3.0096	4.34466	3.87457	6.26352	7.83012	4.41944	7.1176	6.12035	14.1824	1.48557	6.68195	9.49114	2.98727	10.9767	7.30894	5.7878	15.3539	1.31037	2.26434	7.15416	11.3407	3.66928	2.45735	1.25966	6.33279	7.4774	7.29482	5.43889	9.27492	1.16923	1.68599	4.21226	3.20868	2.07763	1.7144	3.82222	3.33692	2.34016	2.11	3.78789	4.96079
	2.82603	1.18891	1.68674	6.74069	2.47149	1.27957	1.09259	8.50444	17.4829	11.4776	1.82037	7.5067	3.61153	8.21147	4.07972	1.07309	1.1853	7.9135	2.99176	13.9942	2.42384	1.59554	5.17528	2.17054	8.95036	1.88588	17.8924	1.05372	1.82496	3.87072	8.53001	3.59271	13.634	8.21535	2.66938	4.10435	5.57984	1.52671	5.5934	1.75799	1.43086	1.57327	2.74865	1.27987	3.32645	6.31018	4.17979	6.24766	4.53179
	4.13531	1.74191	2.30895	1.51297	3.84654	3.31941	2.55102	1.43813	1.48141	1.26878	2.07533	2.99994	7.98206	1.88179	15.7192	2.82002	5.78683	1.05524	4.02841	14.5473	12.5358	9.41085	1.2745	9.26877	3.09438	5.22889	14.3009	11.3273	5.75418	4.75972	2.99608	4.53904	2.75215	2.06438	1.51195	3.90236	6.28898	1.66006	11.1071	1.23942	1.78268	1.33239	5.10697	2.41589	1.52729	12.4618	1.90011	8.55783	4.2493
	8.00189	3.46424	3.40558	7.0629	6.21563	4.71262	6.11712	8.22469	3.28261	1.09965	1.04142	8.13001	2.58997	8.34586	3.44971	2.17871	15.7543	1.19701	8.09826	2.40424	9.28819	3.47518	1.50395	1.10153	7.98543	1.55766	3.63525	10.3673	2.25984	2.24737	1.70325	1.63042	2.65305	5.93573	4.82841	7.91725	15.2429	8.64334	5.27464	7.80001	3.80563	1.17222	3.61435	1.23022	3.49279	9.76518	7.47802	1.98903	9.04607
	3.92079	1.23193	3.86117	7.09132	2.7727	8.55511	3.71306	8.16512	14.3979	1.60432	5.26532	2.11603	5.61755	1.65548	3.15399	3.64662	1.9421	4.77011	3.3752	6.33205	2.54826	4.59265	7.67396	3.1616	10.9127	1.61848	4.23133	2.76428	13.6938	4.76465	2.14772	10.1822	3.66349	13.7542	5.86001	3.59405	6.52826	5.14045	1.74921	12.1036	8.16396	1.32904	3.99491	1.81924	1.55709	4.5669	2.08526	1.23435	2.62164
	4.58369	1.81641	3.05074	6.8327	7.79272	1.01171	5.88356	4.20974	3.33348	1.14845	3.01721	2.96489	1.77496	1.19792	2.85001	1.23355	4.48246	1.36549	4.23327	4.05671	7.74738	1.36299	3.6449	3.58208	3.39729	1.83109	2.28498	2.96125	10.3357	5.71521	1.67118	11.3433	3.42641	2.58638	5.29941	8.12148	3.65061	2.01513	3.23631	16.3673	1.9792	2.15332	7.24257	12.4788	5.61456	7.14125	1.32477	1.8532	5.35614
	6.27628	2.98923	6.64786	2.16697	3.82579	1.87462	5.13033	3.21869	9.23108	3.01708	5.15075	4.16502	5.80099	3.79575	7.09265	8.22571	7.23677	1.677	3.02611	1.57095	15.5965	3.46289	4.68487	2.86005	2.98649	2.66044	1.79034	14.2322	2.7983	4.83902	9.8189	5.78197	3.81038	10.4177	8.82352	4.07621	2.8646	1.59339	13.4161	4.63065	2.82742	1.68744	1.03645	1.82348	6.21992	3.48509	3.23681	1.39213	10.2924
	3.53041	1.66706	2.13734	2.06075	6.4661	12.5047	3.5291	7.26421	2.43492	6.48305	1.99644	3.7383	4.00923	6.93482	4.19975	2.9827	17.5031	2.36855	13.1575	1.10473	5.2062	3.04048	2.15552	1.19596	7.60654	13.5977	7.22249	1.21262	1.28897	7.11101	8.93062	4.47348	2.5103	1.08904	5.17474	2.06314	2.12549	2.20392	3.8567	2.55407	3.68461	2.12446	3.98577	2.31743	10.2601	7.70289	2.74367	1.11341	2.40504
	3.80057	4.95815	5.43775	5.14176	8.06302	9.94416	1.17035	1.63551	1.14468	23.2519	1.03625	1.57388	10.5692	1.63653	1.8492	5.46083	4.04453	1.1005	1.3711	1.29554	10.2031	2.76713	2.4941	9.79303	2.25	10.7111	9.28531	15.0508	1.89535	3.73675	1.6882	5.65582	9.0655	1.67467	6.26945	1.67381	1.59472	6.21169	1.37975	2.16946	1.83053	1.11618	1.39559	1.47423	1.18977	4.79008	15.6149	1.30729	1.50639
	5.37859	3.88642	6.59471	1.61315	4.11177	1.18839	4.72048	2.89128	2.95815	9.20945	4.90331	5.48782	5.24365	1.18803	3.42372	4.25926	29.6786	1.57076	1.35796	21.409	7.99298	5.32819	2.08215	1.37501	8.37799	1.61798	6.37533	8.5352	2.69002	1.99668	2.35719	2.35339	8.35683	3.34577	4.90321	4.29958	2.82013	5.33888	1.64384	6.12225	4.10782	1.26339	2.16048	1.58711	8.17374	8.39705	1.01369	2.13788	8.15863
	1.80717	1.08292	7.70242	4.38154	4.55967	2.429	2.26917	5.96285	3.48489	1.79103	9.1305	1.87106	8.31605	5.87871	3.2672	7.66877	4.3634	5.39659	2.09024	12.4431	1.58651	6.59096	6.04664	4.49831	1.49527	1.51895	1.78282	12.0354	4.47351	1.39482	4.63649	5.96102	5.66459	4.95967	7.89516	2.03951	6.60077	2.42483	2.21022	2.02821	2.55671	3.48948	1.69266	2.18419	14.993	11.9398	1.35526	4.55783	3.90512
	5.28194	2.47156	5.08401	11.242	7.42878	1.07737	6.51294	2.50688	5.65089	5.37097	3.19844	6.86892	7.23847	1.52152	6.56637	1.91953	7.79259	5.17372	3.04885	1.2984	5.7257	2.72616	4.21988	1.1189	2.12337	6.36887	3.41348	5.86685	2.73104	7.0726	3.38163	1.46584	1.17836	4.84883	3.52762	5.69826	3.71103	7.1343	1.45219	5.44938	3.5234	4.87121	1.14703	9.56637	3.35222	1.37583	2.52493	2.80324	2.6609
	1.27581	1.10216	5.85957	2.93216	8.60825	1.53786	6.07752	7.00207	7.73388	8.97485	8.00832	3.94785	4.44685	1.3154	8.92144	3.00145	4.47598	2.10293	4.13981	3.00662	8.22	1.46492	5.73077	1.50508	8.25845	5.31434	7.36558	1.17674	2.35601	3.79438	3.93607	1.56034	7.02075	1.67969	6.27062	9.29005	4.95626	3.30929	2.25303	1.75377	9.04136	5.92884	4.36444	2.96162	12.5639	16.9222	10.9999	5.04271	1.56177
	3.80057	3.22114	2.82488	1.17087	10.9773	6.41859	2.89686	5.45826	10.9089	5.62921	1.74572	7.09028	10.1533	4.00762	3.86133	1.51975	6.56603	2.21107	2.58533	5.45184	9.25488	1.69627	11.0506	1.42223	17.2498	1.71901	6.16822	1.53701	1.22015	8.32803	10.2824	7.14698	10.1451	2.02362	2.75547	6.08872	1.91135	4.53154	1.23288	2.92832	1.74251	1.97684	2.17497	2.05433	3.76264	14.2972	5.1568	6.43149	1.23932
	1.30316	6.35868	6.85599	1.66679	2.72335	4.19711	2.11676	5.85716	4.42378	5.45584	5.25734	1.22413	1.76795	5.34612	3.08057	3.83907	30.2727	1.34097	2.78008	3.6643	5.2289	1.601	3.8657	1.22224	7.04531	1.03995	46.2515	15.488	4.93059	7.24596	1.25355	2.56092	5.4221	3.4659	3.05701	2.16892	1.3274	2.74736	3.55968	4.56271	3.48042	1.8175	2.94365	7.25615	3.86414	8.37026	3.40959	7.24087	5.49634
	3.49835	1.05809	4.92126	5.64122	3.73168	9.36093	1.68964	3.29796	8.20332	1.3385	2.83221	3.88727	4.2179	9.22595	1.38541	1.367	2.64881	1.18286	20.2123	1.66085	1.83004	2.45503	5.9143	2.20127	16.3117	2.20355	10.0831	6.13632	5.39058	2.69803	8.49662	5.37278	8.93008	14.0052	2.58133	3.45283	5.4266	3.16428	3.53465	1.7933	3.53159	5.60223	1.9784	1.34353	4.11103	8.54645	5.74097	1.45688	1.27858
	1.405	2.33444	6.43971	2.29948	12.3109	3.03316	6.11179	3.01044	7.77538	3.13741	1.02029	5.79033	12.6061	6.20395	3.28968	2.05078	5.34772	5.36735	3.92258	9.48387	8.75484	1.0642	3.12246	1.63959	5.10733	9.76516	1.69122	1.87238	1.78416	4.24848	6.90465	1.23118	14.1865	12.1396	2.48511	1.55172	2.81385	2.54733	5.24171	7.47298	2.11737	5.91964	1.31494	2.27033	6.50629	22.7581	6.51251	3.56685	8.63389
	3.09335	4.26629	3.61206	7.05792	8.39145	1.89509	4.81149	1.35161	8.22027	5.31883	4.65962	3.30702	9.85854	21.5135	4.09416	4.62045	14.3698	10.8419	2.87657	15.7476	3.15356	1.98959	3.23108	4.33128	4.17278	1.5079	6.99513	3.97909	1.11075	2.71083	5.27471	4.38576	15	2.57851	1.25093	2.24262	9.61909	1.6448	13.3555	1.25669	2.62451	1.94506	1.65454	5.57865	2.64819	5.4479	9.83946	3.39679	4.36076
	5.05422	4.92667	1.22838	18.5663	17.7613	1.27317	4.02658	3.46529	11.2117	1.8659	2.17017	1.52893	1.41366	88.7701	1.13485	7.62245	1.14994	9.40504	3.42875	2.01624	1.47418	1.25201	2.67051	1.69616	9.94265	1.2782	15.0652	3.96152	2.02895	6.20675	9.50339	7.90658	1.79112	1.5574	1.55909	1.14438	1.99594	1.37488	3.24158	3.43268	2.60891	4.3079	2.48875	1.3308	5.98108	19.2605	12.5964	2.9119	1.04025
	2.68128	3.86299	1.62141	3.40606	47.2369	1.91647	2.91854	2.66178	5.41412	1.62766	2.39696	4.47857	3.61084	51.5138	8.52611	4.16883	3.57241	8.60411	1.994	2.17201	5.32118	2.63567	2.30786	1.926	8.60542	1.84919	3.17243	4.2427	7.26822	13.9418	9.20228	3.07817	4.05255	1.88991	4.52026	1.38181	2.52671	3.56153	13.3944	3.45955	4.39108	2.54225	3.36989	5.4976	2.56844	1.5781	1.25186	1.53428	1.70266
	1.70108	1.01472	1.60647	45.9849	46.9694	1.01325	4.71814	22.3076	7.96187	1.32365	1.53725	11.3147	2.73491	5.44628	4.24594	3.16467	1.59848	10.8674	1.23318	2.48334	1.86542	4.79156	7.23116	1.30197	5.05668	1.02939	26.5382	1.31806	1.28426	3.18907	6.64281	1.2262	1.68819	24.7361	3.25219	1.0718	2.55813	6.10524	6.66953	2.35716	2.18006	1.28137	3.13267	9.18614	6.02095	24.7657	14.5539	4.7357	9.56058
	2.10184	1.13994	5.89998	6.26467	15.597	2.60531	3.78511	1.87019	13.0048	5.82895	1.53396	1.8402	3.35877	39.0086	2.74793	7.28662	1.90026	7.50706	5.18329	4.65447	1.88636	1.3787	2.21975	1.18393	16.7038	4.21156	5.2665	7.32697	5.50894	5.43201	2.92996	1.06117	4.23418	4.86385	1.00394	1.11568	6.41225	3.44424	6.97051	2.49074	1.24176	6.0932	6.66826	1.20391	8.18703	2.86326	2.10426	1.86957	2.05245
	3.96841	1.10706	5.40121	10.2643	65.4092	3.46317	7.4922	1.67488	9.41815	1.00933	2.92518	1.75523	8.03737	5.05467	2.4619	11.1687	1.32676	5.90173	11.0163	1.47026	12.1171	7.09976	1.31161	2.38568	6.32705	1.88387	8.78585	2.38936	5.51186	4.39624	6.83265	2.92083	6.48638	2.10157	1.41923	5.51709	4.294	6.06187	14.8077	2.49036	3.22787	1.65106	18.0125	6.58566	2.21924	9.06955	4.40825	4.5355	4.76522
	2.6728	1.42606	5.42889	11.2658	17.1796	2.04859	6.32886	5.67585	15.5361	5.54555	2.2298	1.69656	1.47878	4.64369	3.04139	2.84594	8.49222	2.86364	3.4727	6.9373	2.57303	11.8558	1.74374	7.94052	9.10891	3.36865	7.32855	4.43529	3.78397	3.5294	2.64325	1.02636	3.63162	6.26895	1.48545	10.6252	3.91647	3.68765	3.54058	1.3039	1.1279	1.953	1.23839	1.627	13.127	1.74182	1.45955	1.89488	1.97885
	2.32155	1.14064	2.51654	40.9475	2.63617	1.17162	1.36638	6.49282	4.84938	5.77985	5.17235	7.14781	24.7171	7.57541	2.19855	4.46936	1.69161	8.89204	1.77904	8.91763	2.90236	1.685	4.66657	1.70062	11.2986	2.94895	2.74027	2.82359	1.0379	4.15343	2.69954	1.22982	12.8883	10.1617	4.156	1.31092	2.31063	5.85622	2.34326	1.66471	1.83616	2.40968	3.94608	3.1008	3.98175	8.4099	2.64336	1.42488	1.77977
	1.29892	1.03745	6.69657	2.66253	5.13072	6.9386	1.24409	3.04722	14.7463	12.0504	2.88855	1.2908	4.34042	3.91446	1.4712	3.91406	4.22489	3.28517	4.59524	1.42047	1.06642	1.44324	3.61304	3.09924	5.38136	9.63799	5.99717	1.0193	14.7696	2.31386	3.26577	7.34276	8.37787	3.60391	2.87741	1.84597	1.3888	3.42577	7.71208	1.08934	2.41521	4.00763	1.45828	15.1768	3.69498	1.73925	5.08389	2.70388	1.31152
	2.25413	7.56857	4.07817	13.8341	34.1036	3.12317	4.51601	4.06831	5.11129	1.00357	2.79559	5.22189	1.31704	12.889	1.46728	2.14287	2.68476	3.1412	1.73509	9.0051	3.73232	3.104	6.59908	7.96235	6.41975	3.66671	1.22879	2.38643	3.27151	4.11058	4.64041	2.35791	3.63035	10.3469	1.36975	1.05605	10.5085	3.66275	2.65082	1.02831	4.3898	1.25753	18.4586	7.09616	4.53112	1.05316	2.69594	2.83748	4.02499
	3.57001	4.9655	4.48615	5.20251	7.03254	2.19018	3.42005	7.68539	2.09468	1.27788	2.89701	3.3394	4.47206	8.9308	4.20985	5.75475	5.06775	3.42002	2.42165	5.92334	4.61888	2.40227	1.88981	1.08015	6.84979	2.41214	10.9679	2.34469	7.05033	2.61824	8.00699	1.34105	5.43612	19.2452	4.81478	2.17904	2.74424	3.05784	2.04755	4.88053	6.52764	2.05672	11.5012	1.21537	3.14238	3.3691	5.84614	4.00001	11.5633
	1.78878	11.278	3.91597	8.5002	19.0238	1.07972	1.55073	2.58148	16.0073	1.19634	6.18184	1.68323	8.63043	12.3782	5.08506	7.26677	5.75205	5.37458	4.92488	5.94295	1.41757	1.16545	5.53996	7.66837	4.41136	8.00996	4.26661	10.3951	4.90638	3.33092	3.86145	1.90939	8.64521	10.3162	4.66245	8.45287	1.02625	4.9344	12.4223	10.9682	1.93647	10.5178	1.78591	7.05288	2.00054	2.371	1.85238	1.34338	4.42665
	1.17067	1.94898	2.20322	42.6275	7.56715	5.18537	6.90527	8.20449	1.9228	4.44741	8.8685	1.88134	5.91933	7.37384	1.564	3.37642	1.61204	1.26145	3.73742	6.59182	3.4248	1.12447	13.621	5.34906	6.87917	5.14194	4.03868	1.06031	5.85237	5.2286	4.35436	5.90947	2.38858	8.82386	1.29573	2.21055	7.27607	1.43674	3.27121	1.70387	4.88261	1.42523	8.09851	2.37048	7.21838	4.46558	2.27703	1.96632	1.68444
	2.12541	1.94234	8.90366	2.7723	6.13353	1.97256	3.45887	2.13285	5.88006	4.48045	1.33535	4.79137	6.9738	26.8509	2.57244	2.98104	1.74996	4.73678	1.8576	1.94111	2.62197	1.82432	6.75312	2.95136	6.27843	5.46865	1.88214	2.68739	1.22845	2.89504	6.53939	7.95631	2.4574	16.6938	1.64713	7.2376	6.44753	1.20177	7.64425	2.42203	3.67744	1.0798	5.95787	3.79379	1.08103	12.0015	1.94165	1.00363	3.88199
	3.37341	6.51923	8.41154	1.8064	7.69078	1.54192	1.47063	1.74948	1.35865	5.72741	1.23627	4.56925	6.43746	9.05983	4.52558	3.67144	5.66541	1.5016	1.65123	6.62664	1.24715	7.34476	7.12678	1.89794	8.17639	5.74208	6.56586	3.98934	9.52358	4.16328	3.73184	7.97078	1.0423	4.26821	2.13137	6.94504	4.27757	4.86853	9.25911	4.01113	1.26019	1.08105	1.13915	12.183	1.6304	2.68045	1.74987	3.26059	1.8029
	2.53277	3.07633	7.29387	7.93715	3.01072	4.39633	1.9785	1.21122	3.09261	4.86085	1.3546	2.12289	11.0418	6.31484	2.38188	8.10936	1.31321	6.17992	2.02381	3.27807	1.88753	1.57847	9.53632	2.7772	22.2305	1.49483	3.36527	5.60177	2.94535	3.00044	7.16845	2.44879	2.91625	11.2679	1.70985	3.60023	6.75159	4.1106	9.23408	1.56607	5.00057	3.14822	3.27569	4.57333	11.1377	1.55277	6.58144	1.90009	1.45522
	6.5389	14.9609	2.91788	7.88528	7.96754	3.03523	9.74695	1.00918	3.19375	6.74099	1.34427	5.02834	6.92339	53.1112	2.46169	7.82482	8.44271	2.9177	3.00514	4.68355	3.18304	9.82062	3.0623	7.99843	4.2437	4.1603	2.10563	11.4408	1.40666	3.55206	4.73533	1.81127	5.83665	6.74732	2.1154	7.02155	7.05613	1.18771	11.2421	3.18395	1.01838	1.35874	4.04941	8.08153	1.6606	7.70437	1.17409	1.44014	2.40364
	4.39793	2.90599	1.01747	2.82026	2.14214	1.21689	18.3268	1.26044	20.4949	5.7262	1.04095	4.3818	6.11958	7.83594	3.89268	10.8726	7.2462	3.03872	1.16978	1.89131	7.06808	4.35089	2.89674	11.1467	9.04661	6.71417	9.9429	8.25035	1.72341	2.60937	5.29435	1.10232	2.83373	6.6708	8.13319	7.36475	1.13598	1.26844	12.6838	1.91459	1.80827	1.15256	6.64684	1.24338	2.35658	4.17338	5.17801	2.64844	3.49225
	1.81895	1.32252	21.4543	1.56128	24.3215	2.77757	6.17099	2.72239	28.9648	2.9701	2.74112	3.52761	1.66643	18.6452	2.99375	2.80293	23.32	5.01529	1.33144	1.00338	4.18872	9.62017	9.6929	2.69836	7.97935	2.48351	5.05688	20.3648	6.19311	10.7773	1.36614	2.17751	4.22686	16.9112	1.38494	8.08266	1.24233	3.05664	18.9595	1.34152	1.22871	1.75101	1.44316	5.21837	2.65342	2.62355	2.45379	2.0415	12.8895
	2.42999	4.3978	6.49285	11.3059	37.6946	8.12654	4.02879	5.34273	4.00578	2.54545	3.45481	4.46523	8.41897	37.3527	1.40314	6.9111	7.75428	6.47603	1.53301	3.88265	13.8994	4.03895	2.3016	7.09868	1.34889	6.32664	48.9892	16.995	1.3356	5.72999	4.72093	1.50382	7.17848	8.4885	1.13211	12.6928	14.5642	1.61628	10.6764	2.61472	1.86943	2.33357	5.52344	5.65715	5.89931	11.2218	1.57885	3.67402	3.01909
	1.41301	5.60315	1.99341	5.33572	23.3689	2.86036	1.06299	3.40727	10.9732	2.87644	1.89221	1.03211	7.71389	26.4523	4.48104	3.59313	3.17869	7.18958	1.53503	1.69654	1.18494	3.39288	1.44023	9.62778	2.02966	5.44955	6.06525	2.48455	1.16769	5.80633	2.9352	6.77351	3.16958	3.78625	6.2192	3.7302	16.2634	1.69581	2.74698	1.49275	5.07836	1.50385	4.54559	4.24446	1.5434	1.17504	1.54571	4.47298	2.63356
	1.46016	6.32965	1.43818	5.13181	14.8663	6.28331	1.01119	2.73379	8.40209	9.5465	1.49968	6.56565	12.2924	42.8077	1.35654	6.39496	46.3642	3.84972	2.29181	9.72205	1.02278	4.73829	5.40643	3.13666	4.52685	3.21836	3.84796	25.8531	1.03454	4.9124	2.0947	2.17027	1.93036	7.88356	2.19877	4.42335	4.32011	4.00938	9.83208	1.01449	1.79727	1.40892	6.53879	4.44009	2.61476	6.44857	8.67067	2.18551	12.4542
	1.92127	9.41507	7.87402	6.4867	3.47153	1.07981	4.94832	1.95878	9.04633	4.75082	1.5133	6.1256	3.20613	5.83913	1.45511	8.12039	34.7316	1.94293	4.37927	14.5993	1.69058	7.20254	6.4791	2.69658	4.23711	3.84766	13.1311	4.40087	2.16412	3.11027	6.07528	1.31482	9.58076	25.9961	2.49874	2.74448	2.55716	1.14192	10.301	3.11371	1.38761	2.23947	4.80171	1.28454	1.30375	1.06051	4.98137	1.1469	1.99427
	1.04903	2.35123	14.182	3.91973	20.5372	1.31222	12.0534	1.61686	4.61261	1.52733	4.21967	10.7634	6.52428	2.45066	15.0401	8.71263	5.03945	1.25516	13.3389	16.6018	6.37994	3.78302	4.09024	8.09686	1.74297	7.42691	4.71188	13.6691	5.76987	4.34502	8.50579	1.11136	9.1799	6.15811	1.3491	8.43824	2.50061	1.15036	10.656	7.02888	2.96227	1.42021	3.53339	1.09103	1.56837	3.04276	2.74057	2.34069	1.66692
	1.59217	6.23975	5.16262	15.8274	13.1596	4.33428	14.6968	2.14528	12.3804	8.81784	5.95694	2.71915	15.2093	20.6218	11.9494	13.3877	4.42529	6.57944	6.80092	7.57912	3.11405	5.24589	3.13991	9.77655	1.60164	1.908	2.73179	9.04265	2.23362	2.81426	6.86276	4.95998	2.4864	2.90101	1.54155	2.01645	5.0017	5.39993	4.24	5.69542	1.52834	1.05763	1.26359	5.18314	1.45358	4.249	13.9821	4.77924	1.97815
	2.686	5.32367	2.12129	2.8231	7.51365	8.39476	1.15322	1.86501	4.31037	1.92591	2.13777	2.3313	8.38887	22.2753	7.13245	6.07568	2.88752	3.02363	2.0377	1.27152	6.94278	11.144	5.25832	2.87029	7.81219	1.91	11.4278	4.07062	4.1785	1.31897	5.86712	4.15246	2.03456	6.73659	1.63233	5.49346	3.05893	3.33901	3.017	2.56367	1.41064	2.94707	4.02263	6.92175	1.08344	2.86105	4.15858	1.37464	3.85395
	1.15747	7.39543	2.98099	2.30835	21.0146	7.20808	1.98174	8.70338	4.18935	1.10481	1.89503	2.04707	3.4715	1.67857	32.6891	1.74253	5.41903	3.34143	1.34962	8.99165	2.8829	3.21464	3.53966	7.12896	4.98171	5.38471	3.2515	8.41877	7.81766	4.70554	5.56405	5.12501	2.03105	6.42626	2.9191	1.69237	3.38377	5.36217	8.55442	5.07436	2.38911	2.23989	5.99725	7.02317	1.68115	13.2231	1.8568	5.47512	1.72369
	3.04809	1.49322	16.306	2.27674	63.5194	5.53981	2.41262	9.35976	2.15255	5.1491	1.17383	1.63332	11.0152	9.48524	10.8845	5.64887	14.2366	5.74959	2.79499	7.07875	1.81265	5.10401	4.07939	10.1756	1.46032	9.08811	20.0034	3.88902	1.5378	1.15742	6.17609	2.42664	9.07506	10.136	2.7734	8.24976	1.35883	1.21864	9.62067	6.23318	6.49924	10.7369	4.81935	12.1214	4.4554	7.96756	5.50015	1.59755	6.53167
	4.1636	3.5982	7.92328	2.49557	8.08055	2.90329	2.42963	1.91992	1.58314	5.88685	6.14287	7.30516	6.191	14.8297	6.2558	6.60616	33.828	3.19935	3.71368	16.3577	3.56721	4.23018	1.39702	3.19322	8.41699	5.98184	1.22454	12.8841	2.26253	1.9952	10.7805	5.21815	1.56838	5.02474	3.08622	7.46771	2.3203	5.11355	9.09776	1.25362	2.49044	2.00486	3.08794	1.64949	10.024	5.83847	4.61196	1.14578	1.2232
	6.02734	19.0134	8.21114	4.20107	60.874	13.8476	1.78441	1.67695	15.093	5.49585	1.73727	2.74734	10.1568	4.46519	6.45789	3.57714	38.9529	1.26365	6.0992	7.33103	4.29221	5.34817	3.65134	3.17229	7.7813	2.71271	1.9664	8.3763	3.05228	4.17116	7.211	1.15703	2.14959	2.54848	3.999	3.76846	2.17915	5.05812	13.6176	5.02523	1.39606	5.38686	3.7662	6.66501	3.07028	16.2306	3.16081	1.75942	1.62416
	6.42338	3.88992	4.03001	10.0039	5.61921	2.0062	6.46712	5.95508	5.08908	2.30236	2.43546	2.70429	15.1512	10.3707	6.1731	6.18928	9.33507	2.328	4.8976	2.66841	4.58911	1.65342	4.93414	3.92683	3.15213	8.44776	1.38537	16.7438	4.55757	2.82559	15.0197	1.32432	2.03201	19.1329	1.77101	7.048	1.79001	4.55323	8.14741	3.61923	1.02043	6.76274	3.72902	2.21262	3.46742	5.3308	4.64863	1.43679	2.27115
	1.49882	3.18686	4.03223	14.9368	8.22309	1.38446	11.2332	1.68783	5.04347	11.3836	2.0434	2.31148	3.71446	14.2621	11.0866	5.52204	6.26896	4.01758	1.24707	1.9909	1.4158	4.7581	1.8871	2.72286	3.78985	3.09723	7.00554	14.3332	9.23171	8.8176	3.54266	8.58886	1.91602	7.79561	1.20028	3.24128	2.41456	1.19896	2.14766	9.61827	1.73407	2.79819	9.58703	4.57418	12.0914	4.32866	2.14005	2.09322	1.5141
	5.19142	6.57764	3.9348	19.1606	11.1775	3.72534	3.18754	1.78575	9.51636	2.8628	1.38324	1.28814	18.2509	14.8899	11.988	3.3312	3.78991	1.73987	1.10208	1.0047	4.60709	2.72001	6.02936	6.98109	1.5905	4.29249	5.01426	8.55643	7.34219	2.09272	7.46891	4.91793	2.78306	3.88279	2.85287	7.16165	3.00866	4.62312	1.68072	1.46281	1.10436	7.05632	4.68703	8.10699	4.98584	4.19577	1.5245	2.38757	1.19025
	2.01933	1.00667	1.35072	49.2858	1.91289	1.21797	13.8431	1.44279	6.91483	5.22275	1.0109	2.48331	27.8679	5.55264	7.9856	5.40404	6.35679	3.36972	4.30627	2.98128	11.8005	4.47126	3.10602	8.71333	3.50873	11.6269	13.4083	7.42656	3.98975	6.05012	1.84988	1.9754	2.11263	6.38979	3.61683	4.59327	6.97685	2.15692	4.512	1.33385	2.24684	1.61509	6.8198	5.54682	1.33718	6.1806	1.7397	1.26003	2.43799
	10.545	7.9285	2.85312	34.868	4.63716	1.452	7.56659	2.46958	10.474	1.1336	3.95392	1.63332	57.5549	4.77436	3.19935	4.42579	3.89659	2.55558	4.23176	4.59387	5.00984	2.50215	2.89945	1.67389	5.68984	8.19091	4.74756	3.98275	3.33697	2.5813	5.74209	2.54465	1.43869	13.9559	1.03394	5.48671	4.60579	3.2892	2.9294	1.09279	11.2268	12.2621	5.39018	1.58372	1.15272	1.04546	2.12458	1.43493	4.23739
	6.26356	6.12712	7.89008	5.90162	8.36746	4.82598	5.95977	3.58341	1.36332	1.65797	3.02566	1.39291	30.0314	10.9462	5.46472	1.9052	5.41668	2.2293	2.65505	5.12928	6.0509	1.98994	1.37838	3.47696	4.32322	5.23643	3.08951	1.10132	6.834	4.88236	2.36898	1.18642	6.22509	15.3166	1.23457	4.82	7.11945	2.49954	2.20365	6.50916	1.99864	3.8784	1.45733	9.28035	1.7766	5.17662	2.47014	1.64704	2.38261
	6.27723	1.24277	2.80163	5.84904	3.17032	3.29506	5.40569	1.15475	18.8989	2.11201	38.5776	5.17236	8.99242	6.56959	7.53046	9.06058	5.64655	2.69892	6.16387	4.38699	4.87539	1.8764	5.51878	1.19195	5.91524	3.29074	6.51438	3.13992	4.09242	6.6574	2.09535	2.03689	7.71221	3.82057	1.53649	1.99338	1.1877	6.47196	10.5315	1.79023	4.44737	4.6274	1.35211	2.99981	3.54031	10.7567	3.10513	5.31957	1.50429
	2.4776	3.06199	16.0614	10.0174	6.02697	9.27002	1.69873	2.82704	7.96304	1.04358	2.065	6.72033	13.4638	12.2364	1.59968	8.43967	3.65434	4.38441	4.15395	7.75671	6.75261	20.6938	6.86208	12.025	3.37652	1.96429	15.4593	2.08474	2.7696	3.14622	1.63321	3.98336	2.90479	6.4949	2.5451	10.2611	3.84251	2.34691	1.84339	8.68745	5.28332	3.21053	2.62011	7.18316	1.39639	3.84044	2.36364	1.26189	2.02441
	8.88543	15.5625	1.59816	1.20462	16.3405	1.75648	4.21586	7.34244	10.3594	1.03176	1.52175	2.07184	10.1162	8.69418	2.10389	5.70181	3.05904	4.0729	2.49591	12.121	1.08411	8.65244	4.13464	5.22568	2.38778	15.072	8.65607	11.4415	8.36821	5.49555	1.69998	6.06863	7.08512	7.55964	1.3678	6.29802	1.019	1.14112	4.76423	1.53881	1.9641	1.31524	1.27052	1.40294	1.09029	4.79449	5.26595	1.79329	1.97675
	3.10231	3.12145	8.53056	2.79503	4.82951	1.04139	6.52398	4.34495	10.3196	1.59462	1.37526	2.0166	11.6545	4.05915	1.06123	1.56386	3.65139	24.5433	5.46215	7.72013	1.21885	2.14036	8.92626	3.67072	7.73571	7.69632	2.94893	1.39056	9.59486	3.22404	1.56186	5.87511	3.33719	24.6832	1.77686	4.27201	6.25369	1.56768	4.69311	6.54294	8.57208	2.03748	1.004	3.15979	1.92844	11.1858	7.53945	3.52703	3.30299
	8.75389	4.11203	3.21736	6.12932	4.42959	2.72643	2.58049	1.61064	10.9873	8.24922	2.40259	3.19729	9.01413	4.81435	5.42348	5.54024	6.17996	1.38372	6.31871	22.1414	1.41079	6.56381	8.18827	10.3115	8.93517	5.71092	1.08107	2.1792	3.55285	4.28444	2.82981	11.5219	2.60749	3.90281	3.27712	7.08682	2.82497	1.1861	1.83154	20.2552	6.18272	3.51164	5.39554	5.98773	13.3888	1.3762	3.00659	2.6049	2.29078
	9.37859	3.06479	1.7504	10.6196	7.4463	3.51827	9.05526	5.44945	5.68129	7.80791	13.5037	7.86598	64.3823	39.427	12.2478	4.61273	3.61603	2.97963	2.7725	3.66673	11.4325	15.5487	2.99367	2.37543	2.64053	1.60239	10.8456	3.539	1.68508	1.93561	2.5156	1.71723	5.1146	10.3577	2.108	6.70873	8.22159	10.6794	1.46207	2.65502	5.68197	1.98144	1.28659	5.58756	1.59214	5.53563	2.79934	3.18058	2.06927
	3.76709	2.35193	5.76214	8.94603	3.95586	5.50554	8.07848	1.16304	3.25163	6.20359	8.66989	4.51362	32.5395	7.12568	48.1854	5.98083	3.57654	1.28502	6.6923	2.99913	2.75671	4.47587	5.401	2.16965	2.07474	1.08921	12.9611	1.29023	5.15386	2.69754	7.4172	3.20477	13.8564	2.91602	5.50199	6.00658	2.35946	3.6282	1.12026	6.44045	1.01659	1.09234	1.36661	3.19331	3.54756	7.37582	4.64024	4.63262	1.64098
	6.70061	2.23056	3.74271	1.06359	4.32211	2.41556	2.305	2.65556	8.44827	7.39357	3.15947	7.74292	10.6981	68.046	5.29789	5.65494	2.3541	1.49186	9.50067	6.95361	1.93707	2.59725	3.014	7.66169	11.7393	2.82279	11.8545	2.90853	2.72567	3.23685	7.48462	1.71723	7.78774	2.23886	4.11627	3.5029	4.57873	5.79918	1.43573	2.56328	3.10454	4.28824	1.65045	1.61172	1.03833	2.93043	4.98181	1.36943	1.09562
	2.94154	2.37012	3.87224	40.4243	15.793	2.08277	7.35822	2.63018	7.60058	2.99495	3.46984	4.58982	15.7471	5.85727	8.89051	3.41557	5.78211	1.84329	4.96277	1.03401	4.99421	1.53219	5.4876	3.64444	10.0982	4.57648	64.0883	3.31786	5.02339	2.22127	2.36963	1.41339	6.50231	3.19991	3.28413	5.24985	5.33814	1.72513	3.6802	2.48498	4.8688	6.32906	4.28568	1.55316	5.95973	7.76824	2.21517	1.91758	4.1771
	5.70438	1.42396	1.53229	19.3606	3.38204	2.23095	7.97657	1.80336	5.44452	4.61988	9.79911	4.09034	13.0381	18.9738	3.63304	1.32785	4.27735	4.70441	4.16052	7.59433	51.2512	3.37837	6.45216	2.90548	5.6716	1.90197	8.58337	1.37811	8.24492	5.68517	5.24788	1.70457	3.53985	6.22533	3.03909	1.19839	7.38774	1.27407	1.48907	1.55532	4.0935	9.80348	9.5445	1.50606	1.90831	5.28601	1.03976	4.3152	2.11764
	3.84205	1.3547	1.65519	41.2175	7.31023	1.04806	3.82847	3.59014	15.0199	10.2379	8.07264	2.6018	6.9591	9.13073	6.40984	8.26431	2.70067	12.936	5.0969	5.98856	11.7633	15.8656	5.86431	6.42342	1.67712	1.21436	7.4161	4.55318	6.17271	2.00456	1.39952	1.14572	7.58443	4.03652	1.16717	1.47351	4.10113	3.42898	2.12593	5.41329	8.44107	3.65508	5.04239	5.71741	4.93429	8.32143	3.02603	2.55354	2.00128
	2.2447	6.01205	4.31399	27.2939	24.905	1.73573	3.41538	1.0729	6.91015	29.3642	7.00681	1.88896	20.5811	3.0962	13.1338	1.1569	4.30446	1.93068	2.70026	1.50948	6.57806	1.56088	4.08414	5.2386	7.11673	1.55112	11.5518	4.07648	5.9779	4.05197	8.73293	1.23525	4.1405	5.76983	1.03394	7.4182	2.28114	2.49913	1.79202	2.12647	1.22999	1.30563	5.38136	5.89904	1.0186	1.91875	1.14802	1.06578	2.5235
	4.00849	1.2036	1.09995	4.23092	26.2583	4.02161	3.71241	3.01406	18.6633	1.22029	5.63953	4.78222	7.99606	37.7216	9.00331	2.1765	7.09826	3.93113	3.26077	5.32515	7.63476	5.07055	2.52867	1.12246	4.52584	3.11582	4.04755	1.34223	1.88884	6.45793	5.47044	1.2886	2.88917	3.67256	2.59458	3.87479	9.88013	5.1505	16.2507	3.42078	5.57476	10.6788	4.8351	3.13391	2.89387	2.13533	1.78035	5.5715	1.30101
	1.69967	1.09307	4.27414	10.0324	18.2986	6.44213	12.1802	2.10176	1.28148	7.54148	4.9005	2.29167	9.45034	2.30886	17.5474	2.12522	2.2598	7.79751	5.54678	3.5288	46.2051	8.60856	3.378	2.59903	5.67667	3.84967	7.83746	4.03035	1.40419	1.51204	7.16322	1.52733	3.25147	4.89889	4.82919	5.77309	1.01271	2.80199	2.25896	18.4324	2.18595	6.95637	1.08906	9.0478	2.26516	7.2033	2.80376	2.38385	7.22564
	1.47242	1.6737	3.6951	7.80748	6.29958	2.35685	5.29105	6.87774	3.7316	1.51005	1.82835	2.99155	10.6231	1.50461	22.6372	6.08395	41.9949	5.70841	4.58438	1.34731	3.98706	5.99628	6.11866	1.44762	3.60547	1.59285	13.066	1.88557	4.38519	6.39489	5.51888	1.02319	3.3101	2.99969	7.16119	4.47061	3.21072	9.08918	5.41163	1.16227	13.5238	3.6463	1.42048	2.61618	2.39042	1.99621	2.20412	3.56722	1.3676
	3.37577	1.23928	1.6978	7.06361	11.1642	1.27695	7.00264	1.35006	1.89006	3.67481	10.1437	4.81613	13.1025	4.16139	10.2856	2.79797	2.41835	2.60085	10.4252	7.65293	74.9002	4.37445	3.52814	13.0348	13.0492	2.91829	52.1487	1.72593	1.6575	2.57047	5.04888	3.46475	3.06921	1.79981	5.56471	13.1626	5.21004	1.499	1.25396	1.33768	3.86014	2.56525	6.32394	4.68622	1.22562	9.09892	1.14978	1.36645	2.50598
	2.22961	1.6076	3.55504	8.33572	2.89679	1.70516	6.28108	1.42103	22.6661	3.25835	3.27639	5.60097	7.3589	4.89473	6.11969	3.28433	10.5876	1.21618	1.91266	1.40901	18.4679	3.69936	4.64539	2.93622	7.82536	1.62401	1.0668	3.56464	3.27981	4.54449	2.3081	1.42967	4.83069	10.1153	3.13258	2.42885	2.04622	3.27514	12.0041	6.23894	2.05852	2.52552	1.64415	1.12541	1.13782	7.03113	1.55058	3.18579	1.1531
	2.9057	1.63208	1.91592	6.11547	8.49339	3.31923	8.31787	1.36871	2.49689	24.8319	5.71325	7.58633	6.50047	16.3137	9.7185	2.2151	1.55781	1.04958	4.44848	3.2362	5.15932	8.24352	3.51018	3.76069	1.38586	1.84818	4.78439	3.45113	3.93775	1.10472	2.10321	1.32703	6.64825	5.95718	4.44429	3.26997	4.28095	2.40434	6.66953	1.27013	5.42814	5.68085	4.90031	6.14941	2.86286	3.85585	2.0636	6.54648	2.32022
	3.21122	2.18509	2.17554	10.5148	14.2842	1.90267	7.88595	1.51325	5.58717	9.07002	12.7285	2.06041	8.66053	10.2652	7.30341	3.28212	17.311	10.1387	6.20706	1.4143	1.85805	3.61314	10.0464	7.06616	4.76542	5.58375	29.1115	3.21388	4.59321	4.31153	2.11499	1.57842	5.90421	2.13232	4.63362	6.40042	5.46865	1.18852	9.54362	1.28318	1.03527	7.57991	3.28987	1.95121	3.82749	25.0619	1.13078	1.7877	9.85429
	6.36445	3.51076	3.89605	4.36946	10.0262	6.04179	5.14838	1.10243	5.29661	5.2279	4.21451	8.09534	18.7018	16.9527	2.83186	4.75555	8.41677	2.48926	1.47239	1.90563	6.86848	2.13609	1.11386	5.21321	1.89189	1.89342	3.31321	1.33784	2.62232	2.64385	5.19093	2.50847	4.06944	4.63145	4.74621	3.95975	12.184	4.54479	13.997	3.23116	2.60609	11.2099	1.11048	1.37366	4.23871	7.78623	3.68046	3.55457	8.50561
	4.08864	1.11895	5.31153	5.03341	6.4721	4.24166	4.03268	8.57179	13.6361	6.59701	5.48881	3.0548	7.45062	10.6003	13.6881	3.13875	2.7325	1.24981	2.87986	11.1209	16.547	3.00736	5.00633	7.32985	10.3043	6.6041	1.5273	1.14525	2.87698	4.07659	2.83504	2.00615	7.30849	1.0161	1.76478	3.00104	1.05622	1.19896	8.17705	2.29766	3.70226	5.06693	2.28524	1.77595	1.99651	10.2185	5.33797	2.01061	3.167
	1.01792	1.1931	3.5949	1.98011	3.60852	1.29301	12.5468	1.1734	19.6963	7.01469	2.33592	4.03853	9.27459	3.95899	6.81549	2.16823	3.81466	1.11056	2.70077	3.88926	4.29339	2.12038	1.44024	2.15628	6.65022	3.42645	6.0367	11.3017	1.55259	4.76908	1.64237	1.79002	8.49704	4.44268	2.57666	15.1301	2.76164	3.45468	5.79098	8.12205	2.28599	2.68527	10.1868	3.02824	3.39854	28.5981	12.7007	1.14057	5.05472
	5.30834	1.3659	1.2782	4.30268	55.9518	1.65574	1.1923	1.5205	2.31683	2.35147	3.90556	3.592	11.4052	6.43109	7.52201	3.67971	5.65598	1.85617	3.19308	2.07087	21.6925	1.40465	4.13582	1.28771	1.77741	2.83837	9.21107	11.3522	5.41098	5.38325	2.83504	1.47895	9.86913	5.21781	5.14475	1.63611	6.75304	2.09185	4.94271	1.65089	3.7757	1.95384	2.4144	2.51561	4.68578	14.1551	4.66321	1.66006	10.6576
	1.85997	2.13577	1.22672	5.30908	3.13342	6.17526	4.74969	10.6803	3.25514	3.38868	3.6182	1.54036	11.3247	1.75978	33.1123	5.26066	42.9497	7.42973	9.7073	6.92497	4.68346	3.8397	4.17547	2.12555	4.48126	3.46716	3.25806	11.5096	11.5398	1.19239	5.89723	1.71813	14.8792	1.75333	7.54921	1.98775	1.5372	1.92195	2.55533	2.63122	1.56877	2.27042	4.36318	4.92598	2.96033	10.4278	1.62835	7.56239	8.63459
	1.2678	1.33127	6.54822	5.54318	17.5136	1.00432	5.31169	1.11279	5.66141	28.2021	1.96687	3.41065	19.3614	34.6539	2.39034	6.12641	6.80179	5.75588	2.99504	5.92687	6.63791	5.06935	1.12792	2.96294	4.07351	4.72928	8.89963	17.4241	7.99206	2.93296	1.33406	1.03043	9.55049	8.78453	2.30707	1.65862	4.01122	2.38064	2.99461	3.89559	2.13835	1.09276	2.71336	1.69023	3.57536	2.83279	7.27741	1.50749	3.27845
	3.98916	1.41627	5.29215	1.77265	5.05231	2.7617	6.84347	3.27516	1.00905	4.69414	5.41369	3.09595	47.44	6.45416	8.3036	5.96815	5.77916	1.8348	4.65031	1.37574	5.47921	1.26551	2.38937	6.31073	2.43387	4.22815	10.636	9.40878	4.93193	1.34113	1.81911	1.19591	10.6661	3.02257	1.35962	5.45015	3.73955	2.00228	13.4886	1.2398	3.78926	6.48296	4.14833	4.96629	2.88058	1.16696	3.0278	1.20495	1.75734
	4.4644	5.72243	3.12769	1.46253	8.75078	1.09739	6.11049	3.22439	1.77255	4.3483	8.63749	2.5797	117.294	65.5261	14.8279	4.92153	3.30482	1.11811	1.53528	6.98269	8.98009	10.8978	1.26502	4.47782	4.02437	1.17817	4.74313	5.95911	1.09013	4.10713	2.80166	2.79739	3.04786	1.18271	9.15933	4.12573	2.37637	2.96948	11.9303	5.03713	1.29422	8.76174	8.66966	2.39042	1.25663	4.4241	3.56866	1.77915	2.55225
	7.124	68.1126	12.2888	4.82843	3.75337	1.55085	8.01772	1.49149	4.21741	8.02432	1.19542	6.21628	59.2766	4.33906	19.4776	1.53353	3.59422	2.09319	3.97082	1.17017	13.583	1.63122	1.65901	8.0305	11.3847	1.51846	18.339	1.12182	3.59454	3.1935	1.82043	1.38717	5.87171	2.36686	3.80928	1.31879	4.46658	2.45857	6.97578	1.16112	1.56417	3.08507	1.03582	6.05733	6.78419	6.65304	2.36939	1.27082	5.88537
	5.75294	17.8182	4.37101	13.5087	12.1393	3.25826	1.5632	2.92858	5.23347	8.11525	5.15122	4.8146	101.567	2.85547	4.43092	1.21811	3.56298	1.4315	3.70332	24.4348	1.27457	3.60409	2.60238	8.62558	3.24584	1.00326	3.53864	2.96931	2.68599	8.1522	1.64958	1.76606	9.61454	1.31857	5.67886	8.782	2.95452	1.08288	9.31311	1.01334	1.73765	2.58909	1.01314	3.48103	5.36323	1.64013	6.19921	2.2324	2.1625
	2.86468	13.106	5.69682	1.87283	1.6615	4.78395	7.635	7.68746	2.25018	4.50682	1.41329	1.0264	29.0645	40.5066	8.15656	4.14897	4.44356	12.4331	9.07959	5.1685	13.7455	1.35702	3.73098	2.30416	5.52218	7.54503	6.22781	1.6549	1.15424	5.45417	6.72922	1.3944	2.42905	7.88356	1.10601	6.24232	1.35399	1.99063	9.11949	13.7618	1.56724	2.49875	1.55814	4.06156	5.66893	8.44808	1.22181	1.17369	3.44529
	4.15229	1.31518	3.47755	3.90303	5.56293	1.21581	10.8214	3.5487	6.2279	4.73173	2.58665	3.4057	11.0391	71.6797	13.9372	3.67144	2.86571	1.50066	4.03549	3.19676	25.1928	3.68519	4.20463	8.86255	1.85339	3.66922	2.15462	2.51824	1.86329	2.70591	18.1676	1.48031	6.73651	6.80882	2.39823	9.16177	9.59541	1.56085	1.14529	4.43757	8.66445	7.09144	1.39716	1.57523	3.46057	8.63492	1.97037	1.26858	7.54177
	7.83593	1.57682	2.61452	3.50374	16.3452	5.92887	2.93282	6.17422	8.11153	4.47773	2.8031	2.7843	13.1536	23.873	8.10562	7.20391	5.18327	1.0939	4.29465	1.80141	6.02082	4.3287	2.80167	8.89996	3.71944	3.34251	8.49582	21.811	1.84737	10.9684	6.16954	2.51707	11.4095	10.9469	2.01606	8.00502	2.31305	1.1596	11.4878	5.12772	3.77186	5.02093	3.56206	2.42904	1.92764	3.94616	1.00529	1.18932	9.85078
	1.64262	2.61742	3.54453	3.11013	13.1195	5.75941	2.00771	1.05218	5.70994	4.44651	4.92773	1.23099	3.02198	8.96419	8.43764	5.3533	1.55015	2.03346	5.70237	2.09864	9.17763	6.98895	10.3799	2.39547	1.31191	1.23296	3.44685	14.0828	1.3885	2.75221	8.71788	1.35326	6.61862	14.0746	2.35187	2.95716	3.28081	5.23967	15.9201	8.36157	5.80812	9.90469	3.75265	8.95741	6.52078	1.39602	1.53202	1.19044	1.96623
	3.52758	3.51635	2.73354	3.48633	9.23327	1.02371	2.23814	3.49896	7.17381	5.59617	4.19761	1.30071	3.74316	3.52987	13.8574	5.45091	7.59926	13.1092	4.17568	2.2738	35.0594	3.26808	3.84672	5.92811	6.18573	3.9522	11.8918	5.16242	1.42639	3.73577	8.97972	1.15657	2.10148	6.33116	1.12938	6.91128	3.59453	4.06842	16.4825	8.45408	3.70252	3.26072	1.28029	3.44242	13.5921	8.38311	2.62303	4.21882	1.05146
	1.22678	41.4704	6.03173	12.3354	12.053	3.79388	4.8873	5.31113	9.79113	5.56586	1.00949	2.8643	12.3316	7.22296	8.70573	1.08411	2.80087	6.19469	5.44927	1.4035	45.7304	1.49856	7.07373	2.65026	1.08346	1.63858	3.41329	5.83171	5.94046	7.37156	5.39058	3.13785	13.0323	7.69907	5.19422	3.7814	1.9331	3.08034	9.81957	2.817	5.80914	4.78088	4.52574	7.05712	8.42466	2.62282	2.3769	2.2964	5.99963
	5.40924	1.30119	3.39561	1.81315	11.2919	3.91383	4.08124	1.86656	9.48889	5.85108	4.44599	5.58116	12.6817	6.6611	42.0882	1.70282	3.99325	1.31488	4.23453	3.88155	17.3779	9.52388	1.18435	2.46362	1.02319	1.51041	6.7319	17.6189	1.7187	3.11224	1.28497	2.26025	1.09169	2.05222	1.61012	9.16853	1.09924	2.91084	4.15109	4.81259	2.34894	1.21864	3.54505	1.77765	2.46654	5.41156	1.21121	5.32069	3.85045
	3.50589	2.01054	12.6491	1.06004	2.94383	3.95793	2.17466	5.18473	2.55652	1.17452	1.36493	1.55826	39.1086	2.70995	8.91381	3.48671	1.14522	2.20698	5.82589	4.37685	5.92353	4.51343	6.25423	1.1091	2.08994	1.57274	27.5505	3.95566	1.35174	1.89226	2.77417	1.81399	1.46291	6.20173	2.02307	6.95741	3.15512	5.17098	12.2524	3.83303	3.31973	7.72042	4.09793	2.03311	3.41868	7.39014	10.0834	2.62164	2.15479
	1.99576	29.46	3.49803	17.0128	26.1075	1.91061	2.20296	5.62508	4.27821	2.75641	5.0099	1.62836	10.5223	9.74082	10.0596	2.0221	2.13307	1.16934	6.11739	6.54798	31.0703	7.0972	1.17605	1.2258	2.99105	1.2978	4.80696	1.2917	2.14148	2.28185	3.92429	1.13216	2.86942	8.35765	1.37443	2.65277	3.39682	1.10336	14.0892	11.9962	7.60897	6.61219	7.76268	10.2725	4.69061	8.01418	5.73964	1.31585	2.22349
	2.34418	5.30164	3.11495	3.84442	49.1927	1.46635	2.08651	4.95989	1.94677	4.87721	4.87044	2.50503	9.12055	9.07425	11.9385	3.82197	2.35823	22.1798	1.39484	4.40836	15.4747	13.4204	9.14114	2.4859	1.7303	5.72348	44.824	14.2798	2.03366	2.20305	5.28126	1.84835	5.84908	6.26108	2.28097	1.13931	2.88104	9.22655	11.6972	9.70117	4.78743	10.1138	1.66494	4.85214	12.9658	10.3639	1.47148	1.32478	2.72048
	2.02405	4.97494	6.52331	1.25755	7.85176	6.0527	1.3486	8.86294	1.60769	2.1793	2.70825	6.18008	4.80044	7.70774	6.35953	4.56531	2.08946	6.43831	4.72533	2.20837	10.454	7.03778	11.2468	5.28759	4.80443	5.54002	18.3292	4.56856	8.33638	2.00357	9.32076	4.62721	8.84469	1.87489	1.81854	5.27123	2.067	1.95689	2.01199	7.30908	1.13455	9.23013	1.26832	2.74137	2.73317	1.58654	2.02207	2.09769	6.12651
	1.48232	3.39288	25.3055	57.5614	15.0342	14.0787	5.59886	11.7563	1.0564	2.64214	10.9034	3.47313	6.23511	4.30319	12.2837	2.92204	1.78238	1.56918	1.63582	8.03851	10.5704	7.9502	3.71726	1.88458	3.17847	2.76096	36.6678	10.2333	5.1839	1.09832	4.17369	6.95618	6.10496	12.8826	1.06861	1.0673	1.73877	4.80708	3.20865	12.4879	5.4788	4.63911	2.29217	4.12818	4.93429	4.01444	1.46441	1.49261	2.1632
	1.88449	8.10129	3.17031	7.17728	30.6976	3.01963	1.97292	5.96907	1.55274	4.70839	3.3717	3.78021	6.34854	9.44114	8.50776	4.84764	3.12387	4.01789	1.52467	11.2395	54.1727	5.88377	7.09967	1.88413	5.34945	1.69438	4.70726	1.60218	8.32831	2.59214	4.11543	1.32342	7.52198	11.8436	3.15128	3.92318	3.52299	3.1924	8.29954	17.5645	1.35947	1.34368	6.44302	2.91324	1.04921	3.13013	1.92308	3.45447	2.25713
	4.29043	5.62938	10.3623	3.03909	70.0505	8.03491	4.88938	4.30765	11.8291	3.10952	6.05038	3.33902	11.1399	3.36827	1.26395	6.33706	1.46291	1.39724	2.7384	3.57683	4.51864	5.48424	5.32509	1.22936	1.99572	1.4511	10.2964	2.68592	4.19868	2.32618	12.4955	2.67622	4.12425	2.56922	1.33235	6.07859	7.904	2.73089	14.4705	15.9674	4.32788	3.09553	24.8153	1.6758	2.16406	1.00875	2.55896	1.29054	2.04614
	1.2447	14.7853	4.87033	3.3453	10.6586	2.63661	1.85711	9.56128	7.19427	3.38292	1.88611	5.82995	11.3436	68.1486	14.3666	1.62452	35.4748	1.77916	7.07499	6.79277	5.69621	3.47689	4.57472	2.18212	1.36104	1.09021	16.4062	15.8724	4.3825	1.42141	3.15776	1.61188	5.25162	10.5028	1.16016	5.54691	8.28492	2.53809	11.5681	6.59706	3.95328	2.68862	3.55985	5.52433	10.5202	3.28981	1.27617	1.06801	1.31783
	7.54974	44.7678	2.28847	6.65934	11.0235	8.49667	3.45186	4.13514	4.21741	5.70286	4.11215	2.00745	1.47388	2.17818	8.99527	4.01167	4.12705	2.08784	5.73547	7.22836	13.6276	1.19909	7.63007	2.33623	1.97242	5.95721	8.53323	4.43309	26.4559	3.54566	3.33057	2.98096	1.59833	14.0109	3.70254	2.06258	3.05893	2.1995	4.29335	1.36302	1.2914	3.13526	3.17457	1.08382	20.9124	2.85261	1.6363	2.30682	2.15059
	4.08958	2.10324	3.53013	4.46929	19.045	2.22779	1.39352	7.97033	3.1084	8.59415	6.83543	2.51874	3.74177	9.36982	1.97624	5.66652	1.64563	2.9944	3.32468	5.13919	3.05272	1.23972	7.29539	6.21273	9.35407	3.08918	4.62993	2.22314	7.26844	1.27661	2.01877	5.92123	2.40865	5.02832	1.08731	1.74245	2.43486	7.41386	3.2587	2.45811	6.37437	3.37447	3.52425	2.77702	7.31585	7.29029	1.22579	2.92195	7.95675
	6.66337	1.32322	3.95749	9.05544	5.21237	4.05056	1.07454	9.33385	4.05021	8.18072	1.03203	6.29629	49.7205	78.9856	1.54833	1.18227	2.0983	2.79228	3.74879	1.19353	42.719	11.2784	3.79063	1.48637	2.61318	1.21486	3.79493	5.31985	7.0176	2.49659	4.32032	1.63856	3.01727	1.96999	5.40693	2.3287	4.98864	1.403	3.46089	10.6953	1.93774	2.59996	4.58906	15.0771	10.2182	3.07763	1.36454	1.51531	1.35779
	1.97124	5.11206	2.76399	11.5347	92.3774	4.8442	2.69928	4.05691	2.16191	7.1232	4.23188	1.05116	1.09298	3.95652	1.39036	4.30172	8.76276	11.4841	2.79271	4.75361	2.77764	2.88255	3.42765	2.40127	9.99179	2.44682	43.5688	4.75455	2.10494	3.12504	6.48048	2.67351	4.18033	5.45735	1.2482	5.37925	3.25857	3.52377	3.55704	4.77497	1.27196	3.77343	1.17979	2.33398	8.89509	2.68045	1.22535	8.66798	6.28984
	1.49175	3.07773	2.12184	7.7947	28.6694	2.63138	4.05203	1.82305	1.31129	1.11329	8.72341	2.76677	3.70815	20.8807	5.56866	3.98851	7.93405	5.18943	5.86656	12.3887	68.7034	1.17826	2.38446	1.87344	7.0134	1.0877	7.4645	1.57875	1.08857	1.5933	7.17369	2.32762	1.10857	9.69123	6.66721	2.52843	3.26292	2.46499	13.5748	10.5594	5.68837	1.81165	9.86174	5.0117	1.83218	4.12419	12.5579	1.53466	1.49798
	1.25035	4.39221	45.4273	1.42594	17.4061	2.76603	1.20787	12.9478	3.48372	6.57489	2.18379	7.71777	14.0561	21.7146	11.0113	2.55258	8.96551	10.8956	4.5859	11.0782	13.3652	4.38196	2.27092	1.50374	2.37866	7.91597	4.41665	2.38716	4.15048	4.72869	5.6426	1.38852	14.7483	11.3523	7.61622	1.5866	8.59961	2.62927	3.71511	8.34583	5.29944	6.18227	39.7749	5.76834	4.03088	2.12615	1.98097	3.85264	1.69215
	2.50448	1.97137	7.54243	26.8768	6.37385	7.48396	1.17243	2.44679	9.53741	1.84407	4.3995	8.45042	10.0161	2.6444	23.1168	1.06923	5.22748	4.99109	1.27915	6.43187	5.71302	3.07395	4.48288	1.46054	2.48148	1.38325	8.06424	1.14086	2.01303	2.35425	6.85229	10.0208	2.71232	4.06084	2.3694	8.74825	6.51956	2.46178	19.0095	5.94722	5.41714	1.21571	2.4459	4.91283	9.74613	2.30639	5.23546	1.56443	14.2235
	49.6242	5.42162	7.78157	1.59219	24.4299	1.10352	2.19686	7.76984	9.3591	2.41693	6.05648	4.63325	2.51366	9.63076	6.07061	1.90961	12.4831	1.50506	1.99147	8.14493	10.4442	3.27132	3.81182	7.29466	1.0941	1.33349	7.04083	3.48774	4.56385	12.7292	5.24198	3.54342	2.45295	1.87847	1.12471	1.04873	7.18084	3.73585	4.42111	3.47759	3.54822	1.37881	1.91759	4.73587	17.8522	1.73741	2.74411	1.03377	3.76843
	1.08817	3.50061	3.61649	5.54069	59.8241	4.83906	2.66734	8.42207	1.33117	4.16735	4.15394	2.54199	16.5334	61.6928	1.38149	3.42164	4.17125	3.33672	4.60333	3.89851	19.5541	8.71817	1.86202	2.04716	1.9861	2.87003	3.64528	22.3925	3.54993	2.95906	7.84858	8.78057	3.42227	1.23205	9.44411	4.31026	2.35221	1.35279	2.19705	2.39478	4.76261	7.70536	12.8284	4.89373	14.9434	1.57222	1.42331	1.6969	4.00747
	9.69307	6.21492	1.10438	11.3027	7.575	11.2689	1.98681	14.5605	1.30603	2.41693	6.78989	10.5291	1.23862	26.8312	2.93374	1.68187	23.5511	2.97963	2.53254	1.34577	27.9056	1.57812	3.722	3.48988	2.05144	5.44955	5.68149	6.64743	8.70559	1.69378	3.32599	3.22873	5.9125	13.052	4.82452	2.35008	2.88346	2.59071	1.25066	2.43162	1.9055	1.04132	8.43464	1.69447	6.23885	2.76084	3.6155	1.26077	4.80938
	6.21122	4.47825	6.06661	27.329	14.4309	1.21103	2.20348	10.8362	3.79239	9.03153	7.91113	2.12251	10.4866	11.6045	6.74001	2.37888	2.42719	3.94936	8.05254	2.18876	7.52625	4.72736	5.07598	2.64981	1.33774	2.31965	24.3246	3.84289	2.2845	2.86499	4.26206	5.05583	10.7225	2.70007	3.65384	4.60621	4.44724	8.58992	7.47301	1.46473	4.26416	1.70668	3.83645	8.72401	10.4453	1.22239	4.67647	1.2697	2.67772
	12.264	5.56503	8.62522	2.11866	6.45549	1.47094	1.11102	7.04611	7.57427	1.86074	1.00292	3.29521	15.3676	4.41449	5.18694	1.05875	45.5696	5.51163	5.94916	5.34564	3.49615	2.30631	6.24542	4.71167	1.33876	7.85616	2.06225	4.58686	6.82055	1.37364	8.32512	5.56856	3.83365	5.1177	4.99476	1.93655	5.01572	2.95341	2.65148	1.37185	7.14916	5.6683	1.46615	13.7306	1.07982	7.86221	4.54258	1.66788	1.47064
	5.75625	2.22286	1.87274	2.97692	8.11422	7.05621	2.82923	6.00481	8.64412	3.15802	1.33347	4.71402	2.41633	6.74272	2.99416	7.44985	18.7303	2.52855	2.27767	3.70903	25.2243	2.35019	6.94647	2.34826	1.2106	7.87928	7.42902	2.84629	2.74293	5.14733	3.15841	9.30233	17.0489	6.3519	4.00913	9.27993	5.6828	1.41545	6.44891	2.09154	1.56468	13.4761	8.83599	1.64864	1.48741	2.49654	7.22836	2.30571	2.10502
	2.37341	5.48527	6.94568	3.95312	9.59952	1.59143	4.04475	7.41186	1.13883	3.99458	3.37687	4.50333	109.702	8.62328	2.67575	4.01994	3.58302	4.53089	5.93148	5.01889	75.1709	4.69083	2.56409	2.98922	1.21871	2.47899	8.88054	42.6965	1.10089	3.01275	14.5824	1.36953	3.11255	5.08837	6.00766	1.48139	2.18012	3.45951	17.4427	4.02648	1.40373	2.82244	9.3161	5.10251	57.478	1.95766	1.64735	1.28719	1.76085
	5.66572	2.34773	6.30187	3.908	5.09336	1.0348	2.43975	5.81572	25.5909	1.03752	4.86857	1.00277	7.41211	2.15222	3.25751	7.2756	19.1729	24.0489	11.9792	3.90557	15.276	10.7332	3.39715	1.3033	4.03146	3.90144	21.347	67.2681	2.06347	1.44604	4.39887	11.4672	2.47684	5.3079	1.78777	3.65143	4.06874	1.57331	4.83075	6.89031	1.15425	5.27394	7.87799	12.0421	4.16259	6.14206	4.06225	1.98605	2.98545
	2.8199	3.25402	6.05388	16.8757	10.7139	3.46948	3.37149	1.66297	1.45628	6.01203	5.39303	4.85347	19.0547	9.36694	12.4256	6.79034	5.23396	1.54907	2.56815	4.69457	5.02841	1.50078	12.2604	1.13761	3.39172	4.43121	3.68153	3.09599	1.98232	5.86937	9.868	1.03224	9.61518	7.72194	3.58332	7.00242	3.8865	1.93118	4.95457	8.93848	8.36738	1.17013	9.1967	4.90307	2.90193	14.0586	7.90886	1.00623	1.5134
	6.09241	7.9299	11.2276	6.72684	5.91487	4.2542	6.15385	8.44538	2.18646	10.257	6.39548	6.43344	35.3885	22.5807	9.88966	7.81765	4.92452	2.17397	6.13103	3.2069	1.70415	4.65958	8.1337	5.45374	7.85829	3.14447	4.07628	14.6137	3.91869	6.52491	9.02357	10.3405	8.14557	10.5801	5.56003	3.414	2.05927	3.41934	16.935	4.5865	3.9108	1.67364	2.63524	5.60369	11.5711	3.81327	2.61331	1.96595	2.74571
	2.56294	13.999	2.55031	8.30269	24.6065	1.65339	2.09936	1.63654	4.26126	2.50483	2.1913	4.05529	20.8654	12.4829	7.39229	6.07127	5.9943	5.13977	2.96018	2.79069	5.78614	2.83662	4.28003	1.24094	8.03608	3.96728	9.21049	34.9551	3.89851	3.5757	18.5178	5.57037	12.3485	9.92434	5.85339	1.72107	1.45115	3.74067	8.49844	3.41886	3.63573	1.26799	2.06408	5.40381	28.2726	4.18329	6.43783	1.93581	2.71347
	4.93258	1.22284	2.33774	2.93038	6.13675	4.23138	10.4239	1.53501	3.11892	1.13421	1.25553	1.41044	27.2496	1.41928	15.7782	2.50901	6.00962	1.68832	4.15294	2.97247	14.7167	22.8634	2.40683	4.12683	3.13035	2.59811	3.19172	3.993	2.73217	12.1682	2.03906	2.20599	8.17362	6.97042	1.84854	1.80096	5.83652	7.40382	7.96827	3.70521	3.78209	6.83007	10.1481	3.10972	40.1526	12.5301	4.27701	1.62062	8.94723
	2.01414	1.71813	2.31117	42.1859	8.24246	3.71443	9.87561	5.37796	8.9452	1.27273	1.58795	4.00309	38.5954	48.6835	12.3008	4.70868	6.69334	1.66474	5.48312	7.86004	16.4232	2.16324	6.53113	5.46086	1.90506	15.7601	7.24678	20.1913	5.50065	4.85675	6.10539	5.93118	7.7052	10.6802	1.34404	2.19649	2.4252	3.44746	19.2921	1.59102	5.93222	2.43059	10.0312	5.0134	4.00954	3.72884	2.39325	1.08066	2.32863
	4.1141	7.63748	5.78262	8.83697	4.96651	1.02136	11.3804	5.11272	11.3018	4.70566	1.6119	1.58912	14.1486	31.1022	26.4034	1.20488	4.87265	2.59362	3.63967	8.09536	15.6681	22.07	3.83554	1.38704	5.18939	13.8837	1.11424	5.70868	3.89067	2.50545	2.76042	1.94601	10.6632	2.99897	1.07172	3.59517	4.23213	3.98126	1.34616	1.6697	2.01323	1.35539	1.09221	2.86444	42.3279	4.86313	12.8301	1.23584	4.01518
	3.07167	4.1701	6.17787	2.81955	4.08502	2.36975	5.27625	5.09407	5.81516	7.65575	1.60486	1.28394	8.72845	6.75138	64.4154	7.04895	3.28891	4.18763	2.1645	8.38134	20.7139	1.87008	5.01769	3.32195	6.08442	6.26029	2.43443	16.7599	3.94357	2.93542	4.82174	1.00918	1.88129	6.08303	2.47186	2.39959	15.7084	4.99867	5.06653	3.54169	5.24545	2.15374	4.59883	1.62106	28.1171	3.22483	5.92745	1.05536	1.73561
	3.06506	6.12362	7.67418	1.55844	5.19576	2.5751	4.84174	7.3041	9.05861	1.94804	1.24989	2.33968	10.0427	10.2672	14.9772	4.09879	8.51639	4.8072	1.02832	3.6502	3.82106	1.93855	2.09655	1.07792	16.8345	5.70489	7.97071	1.56117	8.51572	5.48963	6.27624	1.08197	2.34301	2.95821	1.25482	1.76945	7.98908	1.60343	1.96589	1.82439	6.28149	4.09754	2.35801	5.91899	12.2457	7.50614	2.31946	1.13164	1.0073
	2.31542	2.45267	1.61256	1.39823	33.6677	1.59658	7.04054	6.92022	5.81692	8.95272	1.6565	1.8421	71.4724	37.293	18.2044	15.5669	18.4149	4.80405	2.35117	6.30936	29.6073	8.15099	1.22095	2.22399	5.09771	2.77152	5.66298	4.26467	1.01436	1.36527	9.68602	3.15232	10.958	17.6134	1.60895	3.86017	4.32107	5.07338	1.55822	1.41982	1.25276	5.20243	1.11332	3.23575	13.4463	8.73147	1.69109	1.94325	1.54775
	2.54927	3.56847	5.14823	2.39752	55.6529	1.16747	1.94448	1.7298	17.5069	2.40178	1.8415	1.63674	18.5366	16.9955	12.9214	3.24628	2.49733	2.92807	1.00533	2.1535	3.88032	2.05158	7.55076	3.29389	14.1879	6.26733	1.35799	2.82652	5.6356	11.7895	3.53873	4.27363	4.11405	3.76837	4.29781	5.45858	2.33432	3.4571	1.63001	1.0498	1.72972	4.59855	3.14779	9.58165	4.41593	7.82109	8.61323	1.50786	6.94875
	3.20509	3.22079	4.82826	1.1627	25.601	1.77974	3.37617	7.73616	4.11686	4.15613	1.89785	4.21569	8.36016	5.51595	12.1957	2.31656	14.2431	1.96337	1.15033	10.9414	9.15758	4.48919	3.19498	10.2928	37.6326	3.50134	25.909	3.1575	1.68664	1.97501	2.38927	1.40073	1.25196	10.9476	2.80222	5.26223	5.80075	8.37423	11.9494	58.3302	1.06188	1.86434	1.4608	10.2212	5.45023	7.92205	8.10196	1.99275	2.69945
	3.92928	5.85254	6.79234	1.50764	58.2346	3.4996	3.34877	8.2221	8.47984	1.5052	3.40879	3.9387	13.1739	10.0533	3.97331	4.17158	6.20354	4.35612	2.30444	7.26383	1.19143	18.5723	3.7098	3.04178	3.00523	1.38827	32.2595	1.62634	2.62748	4.37506	7.03688	11.2054	9.72925	1.00824	2.05112	3.76114	5.5344	5.33165	10.4795	1.98867	9.2632	1.98144	8.42456	1.84936	8.5471	4.44062	2.78432	4.81013	1.58841
	6.31636	3.43485	5.02755	5.52008	5.21929	2.28867	1.02119	4.31283	8.55584	3.64874	3.81494	1.96935	12.4212	3.77514	41.464	3.44535	7.91872	4.6362	1.54564	3.32213	1.11566	5.77791	2.44987	6.7851	4.83836	7.07255	31.8333	58.9687	3.8539	2.90834	2.87825	2.24895	15.6092	1.47374	3.05077	2.65502	3.31126	3.28398	8.45102	1.74225	12.3997	1.03003	6.29464	1.34183	1.8636	11.8286	6.86292	1.62099	1.25264
	1.40547	3.68985	1.97736	7.88066	26.3455	1.10587	1.20424	3.74608	1.92572	1.45277	1.18791	4.96053	23.6493	18.2779	2.3592	3.02681	3.17103	1.54749	1.62799	6.97961	1.12332	1.28309	6.48656	7.95879	9.57542	7.10824	35.6095	17.8422	3.70349	4.74002	3.12045	1.9962	1.46833	5.91071	3.12752	1.18264	7.04501	1.28331	7.04954	2.58439	1.07903	6.15677	2.49694	19.4569	8.12379	7.6115	2.17761	2.01582	1.75384
	4.033	9.60605	5.92046	20.2217	9.5068	2.76747	2.37108	3.66682	10.5026	4.37012	1.75041	4.25797	10.9928	1.48442	6.46037	9.78572	13.5287	5.57419	1.78384	2.14513	7.59849	5.8363	1.58936	5.79136	11.5357	3.62047	6.83102	10.7803	4.34282	9.93168	2.40301	5.555	12.5486	4.61572	9.70435	4.52181	5.08726	5.64333	19.6905	7.3774	3.95993	1.39972	4.48604	10.3913	5.08573	25.4246	6.23191	1.59941	1.39143
	5.28901	1.0406	8.55436	52.9579	7.53994	2.37579	2.78612	3.38447	2.67169	2.70306	6.00248	1.0984	9.82984	4.39718	1.43016	6.76056	15.9577	7.06981	4.07843	3.41225	74.8704	10.3383	3.33953	3.2155	1.02116	4.48249	36.7804	12.9471	6.9304	4.81143	8.93389	2.06899	5.94723	13.7914	3.42165	3.53328	4.47673	2.12278	3.52279	3.17321	5.4568	6.64271	1.39905	1.14238	38.9467	5.59547	2.25892	6.29678	1.64519
	6.48986	2.54781	6.49618	11.2064	2.60387	3.68223	1.05092	3.15083	1.18326	7.47268	3.01955	4.39551	19.8193	5.2175	13.8209	5.44208	9.45708	6.9576	4.47172	1.50617	12.4011	4.6	6.04291	1.81331	5.59765	4.57145	5.38587	5.90713	7.61366	2.57342	4.01397	1.28996	14.7412	9.31296	1.54701	6.37847	6.31412	4.66529	2.59286	9.77641	2.48762	3.10013	1.70495	9.84305	3.51856	10.5537	2.50328	7.70566	4.27103
	3.1009	1.29594	5.24677	2.88491	11.0165	4.11414	6.46751	6.33326	6.13846	7.71849	1.86685	1.79791	5.35848	1.8987	11.4467	1.96861	4.18894	2.30662	2.82605	5.21058	3.45252	4.81069	4.11108	4.12594	2.01497	6.41561	22.0863	15.7655	3.0933	4.35044	1.54615	2.26568	9.01229	3.39583	2.4855	4.93197	5.82589	1.64641	5.08826	3.4561	1.7901	1.21488	2.61917	1.50012	32.4263	2.82985	3.86959	7.75292	2.78357
	4.43564	3.56148	1.93751	2.98651	10.4893	1.28372	7.11324	3.55595	17.2233	1.2606	1.50907	5.92139	28.3692	27.9986	11.3675	2.28844	14.2561	4.6494	19.0887	7.17063	9.69712	1.71488	3.47561	4.88226	5.64932	7.89838	8.65819	31.7434	4.3547	9.50368	6.00589	2.19379	6.30857	13.268	2.83573	4.00532	2.00464	1.41144	3.12369	8.67977	3.1703	2.7756	2.25027	5.41909	7.38874	3.27366	1.07555	4.32525	5.36876
	3.88119	3.34601	1.37175	7.49736	35.7757	4.01141	1.05247	5.52146	11.9536	4.68565	5.39397	8.62301	35.3647	10.8382	12.4716	5.98745	10.2487	6.15697	1.74797	3.04121	22.7798	1.56378	6.20102	9.54983	7.91097	7.2525	3.77005	14.4643	5.17023	3.17134	2.48745	5.96961	1.5534	2.08441	7.75608	1.66143	4.16639	3.98889	5.49263	8.91737	3.16646	3.60323	2.82677	4.95738	35.4636	19.2488	4.9226	1.94251	6.93053
	4.09618	2.73809	2.20986	3.24548	27.3497	8.9081	1.44129	1.9852	9.26089	3.44506	1.8631	5.3899	7.88264	5.56954	2.81083	11.4566	27.2154	2.10639	5.51318	6.5634	14.5351	14.4698	6.15696	7.11516	3.29041	4.13768	10.8145	2.76648	3.2213	6.99035	12.9007	3.08721	4.49898	3.68399	2.46095	2.08734	5.11965	3.98488	1.17295	1.30544	1.44314	3.98462	1.7648	5.36647	27.7417	4.53533	1.67165	1.32068	1.19236
	2.16454	5.87913	3.74271	6.1748	9.41639	2.91032	5.32611	17.0027	9.8835	1.87984	1.14612	1.92859	5.63436	5.85933	3.67388	4.57523	4.24139	6.16546	4.12339	3.26462	15.187	1.45912	11.7234	10.5427	10.1275	9.448	22.9308	14.4387	4.4818	5.44777	1.84464	1.36366	10.3812	4.62645	3.44347	1.10274	2.73554	4.75928	2.26686	2.21284	10.0006	7.44273	1.0667	3.07492	63.9246	3.96598	1.02915	2.5435	2.16321
	7.01886	1.51141	1.11268	11.5222	20.926	6.28836	1.46765	7.06269	4.05781	2.33176	1.27618	3.87889	7.08513	2.76601	10.7612	8.17994	9.05628	1.18066	4.22746	1.51741	13.1924	8.64032	3.4429	2.47654	9.25377	6.71518	11.7064	21.0627	5.45828	9.42586	2.59808	1.1507	1.22902	8.62292	1.36585	4.50099	3.53991	3.28679	1.79268	1.10815	3.04517	4.73948	3.34815	6.07897	17.0781	2.67751	6.09934	1.96819	6.74267
	7.06883	4.16835	3.07399	2.07638	14.465	1.12472	1.18606	4.11235	11.8911	4.93329	1.74759	13.4346	7.51504	5.37745	10.6088	9.12841	12.5232	1.24133	3.30624	1.46762	21.4914	1.30819	7.14643	8.20644	9.32671	3.12286	7.17948	21.9868	5.13794	8.77179	4.51997	1.20088	14.3417	12.9083	1.01952	1.90617	3.11887	1.99184	12.5389	1.42289	2.54596	2.97216	3.86701	1.08679	13.8987	2.77479	4.90051	8.47857	1.90244
	1.76096	1.26796	6.91689	16.3066	3.54672	2.39788	1.56904	3.041	13.4245	4.70445	1.01231	10.9836	70.9815	6.54156	1.53286	3.21761	2.72013	2.73318	7.53724	35.1276	21.946	1.77379	1.49954	2.88588	4.28321	4.27691	8.63447	19.7175	3.02829	8.7974	3.35087	1.30623	5.01806	5.95003	4.60401	2.73886	5.52135	4.05678	1.92967	1.16304	12.0686	6.3713	3.18938	1.97031	11.7366	9.01742	3.8117	6.69719	2.48986
	1.23102	1.85979	8.77025	14.934	10.6378	17.2791	1.31601	3.58289	4.20514	3.6054	3.79428	2.41321	25.2877	5.09919	15.5103	5.66597	4.72176	4.71478	7.30889	6.72733	65.6842	4.49738	2.771	10.9427	8.08167	2.01204	3.74864	3.69498	3.94716	5.80436	1.32555	2.50802	1.45845	13.3094	1.61674	2.00182	4.25146	3.34624	9.132	2.41474	3.33738	2.2056	1.10576	3.13263	3.38162	2.03879	14.2451	1.92762	4.78975
	3.64969	1.6807	3.30206	5.05401	2.36863	3.13038	10.1319	3.99993	10.7183	9.13852	3.02472	5.33542	4.2515	1.58665	1.82673	3.37422	4.38462	1.59936	8.00025	4.39976	11.6604	7.83904	4.79366	1.30642	6.33617	6.38545	14.3298	9.58233	4.61586	1.6923	4.26926	10.3065	2.78306	11.8443	2.13916	1.5641	10.6801	4.87978	1.12224	5.74762	3.0375	1.6473	3.04667	1.0766	28.4655	3.06075	1.79891	1.42562	9.34328
	6.56341	2.76607	2.61397	3.90019	4.83966	4.77232	12.5072	8.61738	8.01975	8.75056	2.15045	7.02056	23.5975	5.45742	18.6148	6.82122	25.6022	2.57224	4.07565	5.17577	70.6991	2.50096	6.08375	1.64717	9.43359	1.336	7.34166	10.4596	3.32958	7.13268	1.28497	1.07429	8.92498	5.38513	3.16219	2.33039	1.44777	1.79944	3.23104	3.79618	5.33551	1.09276	1.11458	4.04883	11.6186	5.34658	4.97474	4.03424	9.47927
	2.64734	1.46034	8.85662	10.8828	14.4461	1.23745	10.7761	6.1509	3.8643	11.1614	3.52805	2.25929	2.21607	5.51636	2.67905	2.92976	3.25354	4.07699	3.64396	5.17048	10.0518	17.3733	2.31515	4.93705	4.57193	3.12939	1.56606	9.96017	4.92453	5.50195	7.07354	1.0675	6.37836	14.5772	8.08098	2.45529	4.105	4.52511	3.59853	3.88062	3.04927	5.36553	1.09662	1.03247	34.4792	4.46485	1.17939	4.81534	7.03707
	3.64121	2.64225	1.07006	3.54459	5.0131	5.6254	3.90091	1.62981	8.85926	3.24683	6.16964	4.36046	46.6818	2.86577	2.22247	8.92824	4.40348	3.73907	7.3435	8.6475	9.0196	3.12602	1.86998	3.24267	6.4704	3.12939	8.70177	6.38822	4.3946	4.81685	5.84225	1.47714	11.348	3.8313	3.72825	1.27941	3.16818	4.3295	2.14831	4.29824	3.58865	1.49298	4.9189	2.26906	1.95905	13.9246	5.42502	3.86343	5.8314
	2.20792	2.57404	2.43904	1.17052	33.4735	8.66541	2.93347	1.27805	8.22612	8.39198	7.65523	4.46562	59.953	9.10187	14.3598	2.48586	2.07119	2.07527	1.04651	2.51551	59.6	5.75213	1.11131	3.80434	7.10862	8.20096	1.19156	20.6109	1.0166	6.01713	4.12852	1.54994	4.93903	4.06084	2.54939	9.96408	5.25016	1.2347	1.58588	1.64936	1.60971	6.95051	15.7106	8.40277	46.1691	3.687	1.35659	8.8466	6.38867
	5.46582	1.50056	3.58328	1.62239	8.96988	7.57424	1.9611	6.01206	4.27471	10.7662	8.55063	1.1666	3.39028	11.4619	10.7271	6.40102	6.17937	7.47406	6.3571	7.89375	6.56834	3.27507	3.89112	4.07159	3.64549	7.7501	5.90789	1.39129	1.0527	4.34748	2.84421	1.04354	4.10959	14.2354	5.71469	8.53951	3.61145	2.99398	3.69271	1.2494	3.64955	2.49917	9.42069	2.46214	2.53783	7.2334	4.9363	1.24626	10.3015
	4.2678	2.06476	3.22235	26.0264	19.2931	8.06053	1.55268	1.57749	2.47351	1.70465	4.59859	3.23691	6.43536	33.7466	7.07327	7.45647	3.38026	4.94016	1.45546	3.33249	2.16232	13.8251	1.21909	4.83816	2.84821	8.50958	7.30502	25.2739	6.02139	2.90292	1.18809	1.7118	2.23053	11.4152	9.41957	2.22405	12.651	1.46204	1.05967	12.6805	2.24454	4.94314	5.22007	1.32019	25.6852	3.92707	2.16701	2.46014	6.67467
	7.98868	1.68035	10.4598	9.09168	2.4143	14.5138	8.92167	8.2739	3.90698	6.10781	5.69118	1.64094	19.1044	6.86227	7.28877	3.68522	9.53488	3.41404	2.08696	2.43463	10.2983	3.05346	2.12231	4.87157	7.82536	8.93028	3.68674	14.5273	1.05785	1.68245	1.12786	5.96011	6.81904	9.16924	10.501	3.34762	6.85407	3.18517	1.22629	1.57567	6.77584	1.44321	8.85332	4.84663	9.25718	3.28027	1.21032	1.24514	1.84636
	1.37152	1.65656	12.2727	2.01031	23.2347	1.01253	8.47976	10.3959	12.2717	3.22197	2.70356	3.39274	13.5779	1.40939	6.35437	6.20527	5.18268	3.44831	3.41814	1.21071	4.23442	2.37956	11.0223	7.05948	3.66626	4.82679	47.3422	2.33004	5.24084	1.43668	1.91141	1.21219	13.1681	4.45484	4.76296	3.77127	4.54054	1.72393	4.5581	8.80759	5.55199	4.93771	1.99698	3.254	26.9974	6.77417	1.63851	7.18133	2.03773
	3.84253	2.71256	1.49963	3.96769	4.09655	1.05753	3.3715	5.82815	6.58277	3.16741	2.50542	1.09992	13.7691	66.9388	6.81095	2.08166	8.11441	5.46134	1.41959	5.43862	2.974	3.13149	7.85206	1.29929	3.30155	3.78282	7.42651	6.23664	2.4997	8.42063	1.82828	3.34267	5.99184	4.50775	4.76686	7.88687	3.29338	1.9348	4.21168	6.6934	1.12125	1.30688	4.89401	1.29854	8.21441	5.03163	1.996	1.8078	7.43523
	4.28854	1.09866	5.74165	4.2636	14.4133	1.85866	34.7995	5.46862	14.7645	5.71984	1.82131	1.28509	4.52317	4.5666	4.30678	3.32679	4.57205	3.1786	31.8345	11.0306	12.6313	2.63191	2.06723	5.3553	3.51075	4.94943	12.268	3.07475	2.7167	2.52909	1.18874	2.00253	2.12315	4.05369	12.3165	4.72717	6.85987	1.20177	11.2586	3.29987	2.53598	1.67992	1.11931	1.70296	41.99	1.70144	2.65529	1.17109	7.45696
	1.40688	1.07803	19.0457	5.02701	8.40206	1.35118	2.26995	7.5507	2.97628	4.1916	8.90888	5.29161	10.2752	3.94044	18.4985	6.063	8.57002	13.2673	1.91671	2.42737	12.6496	1.83986	3.08433	8.00689	1.2957	2.83385	18.3963	3.91245	1.46023	1.07517	1.0048	6.17714	4.43174	4.88745	9.24971	2.848	8.58076	1.96573	14.672	5.61059	5.49364	1.55822	4.25481	6.20118	1.87246	3.5486	1.29031	1.77356	1.96833
	1.6728	6.04492	4.03776	9.01281	24.4119	2.6449	5.80178	7.55329	5.9964	2.5994	4.53708	1.0504	12.1446	10.6729	10.5009	3.32458	2.7496	3.16037	2.13899	2.2055	16.6107	4.84756	5.47794	7.35969	6.71303	1.78837	14.9342	1.31513	6.0985	4.15638	1.01593	1.36863	4.853	6.47631	4.19184	6.6249	7.22435	3.93106	2.69626	6.741	3.62345	3.36652	1.55972	2.76004	38.5149	7.72456	1.32698	1.6329	1.42578
	2.77982	1.44915	17.0323	7.75491	12.0429	2.55192	1.75287	7.27561	11.1533	6.42758	9.59721	2.81211	9.37542	7.15907	7.33661	10.4375	4.04571	2.71527	1.22282	13.3861	3.32515	9.76086	3.79843	1.05342	3.09236	5.04543	4.08939	7.62061	7.58183	2.89651	3.10474	4.94777	7.85018	5.47594	22.0574	1.56803	1.16353	4.836	3.51621	1.74379	6.88612	1.48754	2.89104	1.74455	15.3079	18.8707	2.06979	6.83823	1.57929
	3.43046	1.50651	4.61513	3.60072	8.33425	1.43848	1.30835	1.21951	2.36711	11.9258	4.27837	6.82701	14.7192	24.1014	11.7339	5.39025	1.90792	5.8967	2.34081	4.23209	9.1452	10.2497	2.12926	3.33175	4.33335	7.88581	6.53944	8.92769	7.1929	7.45972	5.06066	1.06886	6.33471	5.11054	1.76205	2.09971	9.9565	5.08704	3.08351	4.85289	3.70175	1.46161	4.36696	10.0383	11.1256	3.6356	1.3831	1.43902	2.78637
	1.65818	2.42259	4.48671	4.50055	4.59611	2.14365	10.688	2.82186	7.81747	4.57957	1.09682	1.65275	3.17042	3.16999	4.14798	4.43572	2.72248	2.80705	1.26551	5.27073	26.1162	9.60754	2.0569	1.98034	1.66344	5.60889	7.62899	34.7588	3.18992	3.30678	3.48309	13.4467	7.53696	2.79303	2.63938	7.45759	4.04457	2.40434	3.05124	10.7974	5.06454	2.72918	10.6074	2.0921	10.4747	2.0197	1.11223	1.4606	1.33045
	3.64262	1.14658	6.46407	1.29308	12.6296	1.44687	6.05882	3.77561	9.00483	5.24033	2.13918	2.7622	16.2652	16.4806	3.10222	3.94495	13.2977	6.94094	1.91317	6.09564	7.55928	3.78251	3.13788	5.06177	8.72496	1.99143	3.86338	23.6087	8.69662	1.75781	2.00829	1.55084	6.27607	6.09375	2.85443	6.7875	4.41969	3.40488	2.31889	2.2589	4.50904	1.97642	3.32925	1.02695	27.488	3.13049	3.22841	1.29054	12.6869
	1.64121	1.04025	2.39531	40.5998	8.35639	1.40303	3.39967	2.22351	8.94987	4.77386	5.55173	2.68028	7.58716	19.4647	9.0097	4.71585	1.86371	2.9856	3.87231	5.05018	15.8636	5.95463	5.63401	1.0797	3.59737	1.38425	5.84984	18.696	4.61272	4.66762	1.2974	7.15105	5.27011	1.95284	5.71002	7.25842	12.0216	5.77388	7.30705	2.24201	4.1526	1.87354	1.16341	6.25466	30.021	3.43004	1.76931	1.42674	11.9768
	1.15417	6.92567	27.7323	8.29381	5.97392	1.81654	3.67866	7.39269	2.4355	7.80094	2.87635	1.39939	9.48115	6.78848	8.74492	6.69549	1.58669	1.24227	1.95182	1.74016	7.5581	5.89094	2.18975	15.424	5.15038	5.40331	5.96208	16.3015	1.91798	7.08195	1.40476	1.98083	5.23218	13.8515	6.96407	4.39916	2.50689	5.0541	4.27754	1.28087	2.64985	2.54601	1.48978	1.50181	4.20206	19.6632	2.53377	1.40292	3.44599
	8.78265	28.2235	18.8597	2.86537	44.2668	2.6385	5.93614	5.15675	2.00172	6.7522	2.0279	1.18565	83.8936	19.6886	3.52147	4.70537	1.42637	1.32557	2.00941	4.59211	8.0033	3.65565	3.59355	3.27429	4.6702	8.16578	5.5467	34.9455	6.16957	3.5954	1.00153	8.44327	2.45773	8.59004	7.23288	4.13642	3.47852	5.69957	4.91176	2.51799	3.01165	1.24959	5.65828	10.8658	4.88153	2.59565	1.30975	1.18523	2.33635
	1.33993	1.41592	17.8234	7.42666	3.94618	1.09775	6.83361	2.00126	6.18815	2.75035	1.16725	2.22271	11.8499	25.1942	4.83079	6.81184	2.07295	1.78388	1.48982	4.47446	38.9424	3.62714	9.47955	4.06269	4.14189	7.37011	15.1043	23.4755	2.36408	4.69422	12.1119	5.37098	9.17225	10.5186	7.38442	3.36281	4.58259	5.19629	1.84603	1.33192	2.15677	1.73721	3.01989	1.1933	7.70411	12.0899	1.17939	2.7597	3.00087
	4.34465	5.33067	53.2908	4.33642	5.99145	3.85702	1.3634	1.92096	3.86431	2.26235	8.62716	1.0984	29.8928	13.0765	1.13011	4.75941	4.63217	8.52898	7.03912	1.85539	5.57975	7.9922	5.05887	1.53581	4.50912	5.78933	8.91544	17.3545	5.34776	19.6432	5.64783	7.09273	1.50593	10.8418	4.3578	4.09984	1.7876	2.98434	1.15582	1.89809	2.79723	1.96178	3.94419	1.38893	55.8862	2.22857	1.08925	1.94697	6.77771
	6.78878	1.96437	7.96037	8.05757	12.7412	1.83548	8.02888	4.65993	2.94295	2.30176	7.36835	2.29129	9.93557	2.56773	17.5109	1.91898	2.05704	1.59528	4.99965	1.61281	1.99928	5.60222	2.81082	3.27919	2.96522	3.64409	6.10381	11.9768	1.69404	3.92539	8.68253	3.31735	1.17453	3.3851	1.62999	1.77001	3.43501	1.25479	9.71881	4.79109	6.43424	1.39805	2.89892	2.31701	20.5648	14.2829	1.14713	4.13955	1.76155
	12.4055	7.62558	20.7706	12.1976	7.23181	1.05086	6.6773	3.81705	7.29541	2.56424	1.62317	1.94497	3.38187	7.69908	6.47006	4.7175	26.5547	2.76367	6.60238	3.96241	4.00681	7.95976	1.27891	2.9233	12.9595	2.24074	8.24088	36.7894	7.83985	3.57274	12.0524	8.60287	6.44304	2.61283	2.94286	5.71739	1.63146	1.52551	3.13028	10.4761	3.43154	2.57069	6.13429	3.23108	15.1952	4.13557	1.13255	3.21593	3.25042
	1.92833	1.10006	4.47342	4.52932	37.797	1.47491	10.4994	6.13433	4.94467	2.54909	1.00621	1.30185	52.837	6.99377	9.70819	7.0473	2.9276	1.08321	5.38107	1.27549	6.74848	10.0853	5.80076	5.17223	8.52539	7.28517	2.63228	22.8428	1.58061	2.9438	4.41065	4.90663	13.5068	2.30607	6.69409	10.0867	6.09755	1.55764	4.7807	4.26446	2.99093	9.8131	6.09995	3.41313	3.14601	6.79363	1.18381	7.44963	4.45609
	1.32108	1.62648	4.4308	5.22773	29.7538	1.70191	7.47143	2.61878	1.44692	2.90463	6.33961	2.42959	20.2114	16.8904	20.2176	1.15635	5.01057	4.23384	13.8024	4.28167	4.79402	4.57114	4.49575	3.54733	10.824	3.84313	22.9404	17.0821	2.71939	14.3915	2.78922	1.10865	1.88671	3.62465	5.35395	6.52307	12.1569	1.62351	4.01608	7.68217	1.58643	1.84176	4.41989	5.78404	11.2742	10.0214	1.06627	1.56778	2.90694
	4.82178	1.16757	24.9063	4.86715	6.78254	2.25061	5.2895	1.44124	8.48452	4.21039	3.03317	5.97244	14.2928	1.39579	2.79845	3.6957	4.23785	2.19535	1.74646	8.58999	11.9057	1.37956	6.54519	1.24317	1.97394	5.76219	14.7124	29.3592	10.8114	3.46439	2.04233	1.63087	2.61991	3.45018	2.63354	5.74946	7.56369	1.19695	21.8454	2.8884	2.23021	1.36919	1.51751	8.63447	6.38706	1.76715	3.15374	3.10169	7.32798
	3.73597	6.8809	8.51948	7.69523	23.0677	5.02872	6.51944	2.08829	10.4026	3.50204	8.26703	3.6842	9.95238	5.07116	9.19531	4.37837	10.5781	6.2387	3.17287	3.52219	27.106	2.92148	12.5259	4.62614	4.24674	4.59658	1.92976	12.4352	6.25139	6.25058	9.07987	1.60962	4.87785	2.19953	1.62882	7.28261	3.81254	3.88647	4.82482	2.28884	3.20356	1.11743	3.74856	8.5793	9.66961	11.0658	2.23417	1.40069	8.7096
	2.51155	4.28307	1.27544	5.19469	26.0821	1.36967	3.80939	1.48475	12.1202	8.76662	8.3431	1.25766	7.23777	14.0811	11.4747	13.7726	1.50358	1.9379	3.92131	4.0393	15.6631	3.03929	5.22934	4.03641	6.32857	1.53504	10.0418	3.37718	3.39459	2.37149	2.13528	3.74915	4.06402	10.5078	3.49762	4.68216	3.32383	1.15919	1.31191	1.37184	1.03783	1.7899	1.56318	4.6998	57.1851	4.2523	1.50639	1.87999	1.83865
	10.3522	1.69014	5.9343	5.8533	7.97538	2.65546	6.26992	1.93287	3.40889	1.37154	3.29846	6.36563	7.92605	14.5053	6.73052	4.28352	1.55015	2.35566	6.02569	1.93846	2.41794	5.96572	3.73268	3.74777	6.49421	1.81099	11.745	9.82104	12.5508	1.7583	14.6871	1.56621	3.71351	3.36293	1.7379	4.96178	2.76889	1.86411	2.37685	20.0034	3.45841	3.2373	1.16908	18.64	5.34793	2.29795	2.1617	3.83255	1.74122
	3.3753	8.726	8.82284	9.27036	11.4317	13.3576	2.35849	15.1232	3.05345	3.02951	2.02368	2.80449	8.61923	3.6729	3.5619	6.63649	2.71954	5.63014	3.13852	5.3084	13.6007	6.90546	1.50327	4.63951	6.64667	9.17808	12.2464	42.8744	2.57032	2.02918	4.72093	1.22847	8.62641	6.13237	3.76292	2.13291	3.47223	1.07243	1.32772	5.25937	1.01276	6.65944	7.17105	1.72333	12.7834	8.40146	1.90806	1.78845	2.89923
	7.88213	4.42089	48.6004	12.3755	11.5756	1.81357	6.82543	2.98557	2.18763	6.0193	2.17299	8.31707	14.3845	13.262	15.3721	4.90664	19.0898	1.56384	8.37434	5.12884	7.7067	1.15708	3.75742	11.8941	8.23262	1.40235	1.83758	7.65429	2.33046	1.38152	5.06786	1.5106	12.512	13.8915	1.77257	6.86908	1.19399	1.03709	1.94416	1.73841	1.80801	7.46072	1.1883	1.42925	7.05968	1.57589	1.78654	5.07732	5.29165
	4.33145	1.49986	3.18637	2.51724	76.7182	4.00122	18.0263	1.47906	4.60618	4.01368	7.4322	5.10988	86.9786	20.3955	7.65646	4.58461	7.39179	1.45288	4.12465	13.8687	10.4843	2.05909	1.15825	3.04267	1.29722	1.59837	19.9494	2.2246	3.73151	2.73694	11.17	1.86598	2.88822	4.61787	4.51013	1.18545	1.6566	3.14782	2.14239	2.21245	1.20185	3.41796	3.14968	2.52749	21.6326	6.97791	2.70125	3.09313	1.05146
	5.66242	1.62229	5.16096	16.9851	3.12142	8.29032	1.42558	1.76761	6.42843	2.69124	1.4809	4.08653	11.4087	11.2355	6.27807	4.01001	1.92148	1.05649	5.14313	5.64793	26.0673	1.91772	2.10638	3.84176	5.36667	4.43624	7.24852	15.3708	2.94782	13.2862	8.13398	1.52597	10.1295	4.25962	2.98338	4.83913	6.51714	4.68537	2.64753	2.15104	2.4541	7.92701	4.95355	1.01931	1.39518	1.33802	2.28101	2.70388	2.85296
	2.27346	8.15795	1.84229	30.5788	4.89178	5.24003	3.40486	1.463	8.62483	13.5508	7.66838	4.93843	2.17476	20.2562	1.30911	2.12742	2.45018	4.39761	3.20091	3.92606	5.4341	5.69715	5.9087	2.93265	8.50006	2.10654	6.84741	17.8195	2.29705	15.2046	3.65983	1.39531	5.61201	5.56676	3.07882	5.81191	2.26568	4.26524	3.7151	2.01094	1.55009	9.3673	1.66273	2.65141	24.205	8.83462	1.67253	2.88362	1.32764
	2.79585	3.70069	8.48738	10.8523	2.73903	2.65988	14.8199	4.82053	1.63692	1.19543	1.65416	8.06752	5.59935	4.76241	14.5258	3.07699	1.58374	1.13382	10.5755	1.4035	1.44764	3.26449	7.81834	5.8221	7.08786	1.79591	7.39431	24.3373	6.70376	5.89055	1.8885	2.77659	14.6485	11.1006	5.93714	1.35424	2.9985	4.08248	3.2778	5.80443	3.25422	2.63049	6.42443	2.26821	52.9875	8.63199	4.66366	6.41437	1.08791
	6.48845	6.98374	2.93615	2.11475	36.2149	1.57592	6.99952	1.40808	2.96751	1.02842	1.37244	12.5541	46.7602	9.24945	8.49002	1.40726	5.24516	4.85372	1.41176	3.81809	19.3972	4.01591	2.35802	3.37585	3.82885	2.68607	4.16749	8.21521	2.42595	2.11784	6.42091	1.54903	9.78916	2.86096	11.9842	4.78062	6.57273	4.91834	1.27437	2.40476	2.88244	3.58608	3.58001	1.39487	7.40364	3.90982	2.10558	5.61504	2.62234
	14.3159	1.59396	7.89339	5.53856	4.41529	3.86937	11.1411	1.162	4.52551	4.93511	8.31539	8.70721	14.5477	5.99248	8.47683	2.38495	6.49648	5.75273	2.59922	1.46233	1.51457	5.81513	4.42865	4.28941	3.67537	2.05527	9.29206	1.65418	6.4361	1.09093	12.0962	1.53773	4.75772	2.16307	6.55657	3.82247	4.3931	1.54278	1.40938	8.51396	1.1343	2.81492	2.62705	3.54384	24.23	5.43358	5.66364	12.9862	1.09492
	5.752	4.5587	3.77093	29.5781	4.6021	4.41193	6.62706	3.20626	4.13264	1.33395	4.19855	2.08479	96.0396	4.42603	15.3925	5.43381	1.35387	9.3318	3.51943	1.92678	16.0028	2.08043	2.69745	3.40658	4.76593	2.60062	1.78436	9.73171	6.31259	3.9643	14.8449	1.54044	9.02631	4.72727	3.43879	5.22115	2.3609	8.64414	2.48486	8.59226	4.13546	4.4229	5.64378	1.7123	50.7497	7.89671	1.29384	4.681	1.09913
	4.93541	3.21869	5.7566	5.32328	2.58497	2.72689	5.46683	1.27287	6.55529	5.24882	9.04082	1.4573	52.8896	10.7842	5.78086	6.52124	1.21183	1.36015	1.83335	2.14844	5.8395	1.81254	2.25771	1.11355	7.05037	5.14194	22.4111	10.2069	1.34456	2.42123	9.42156	1.5314	7.78009	14.6745	8.2898	11.9029	2.83173	1.60946	3.50435	1.38912	1.83156	1.17306	9.52875	4.39638	6.62147	2.14597	8.25177	1.37725	1.76295
	6.75436	2.91438	5.56229	10.6313	1.56371	2.54399	8.61893	2.62655	17.4888	1.18089	1.9401	5.31485	30.5216	6.83176	14.6916	3.90359	2.24801	1.15488	5.59199	4.97923	4.72296	4.84859	9.17605	6.59401	6.46027	1.19426	5.14385	10.1799	2.30602	5.36995	4.20053	1.30126	8.14749	11.6255	2.08618	9.15221	1.6769	2.83452	16.3837	7.79617	3.63445	9.27487	3.60112	1.14535	17.9811	1.40483	3.85103	1.25779	1.01992
	6.18906	2.29527	24.252	13.7645	8.68389	1.59216	9.6309	4.32578	1.87077	2.17112	1.95043	3.18396	8.61642	40.3587	3.52086	2.03699	18.59	1.63708	6.96233	6.50436	2.97725	1.49651	4.71724	1.7701	1.64673	1.41642	2.92772	26.2588	2.34054	1.40516	9.8968	1.62952	1.68214	3.78411	9.05882	1.04254	2.01528	2.38185	10.1284	7.55397	1.33285	5.76156	5.65701	9.00366	19.0492	2.50718	4.47055	1.04717	1.55897
	9.93258	6.00785	3.43603	45.9252	2.73626	2.19127	5.82294	1.74534	4.26184	5.09787	1.38324	3.84231	9.19828	21.3762	45.4975	3.09629	3.06257	1.36612	4.8486	6.23599	1.34858	2.55047	5.09581	7.7138	2.67093	8.8383	3.5128	10.7825	1.80433	11.3393	6.99433	1.79319	11.8288	1.14195	1.60622	1.27434	4.51395	4.25078	9.46196	1.76259	1.01889	9.32673	2.1126	7.21541	18.0701	2.1702	2.94384	5.50117	1.82814
	1.0943	3.97667	3.38509	9.27427	9.22265	2.97364	5.8019	1.28116	1.70591	1.02661	4.13187	5.52211	18.0948	44.3881	4.11395	2.87903	7.43069	2.02246	10.0657	12.08	5.90024	4.23291	4.85094	5.54816	6.45419	1.19124	2.79813	10.0136	3.53581	1.36527	2.91229	1.58249	16.1133	6.47846	13.7622	1.42231	1.67448	4.48414	7.78255	2.15027	1.24432	3.65926	5.03924	1.67029	22.8453	4.73833	4.3075	1.67197	1.2926
	4.13249	3.16447	2.42299	4.26715	41.7677	1.85451	1.03131	5.01273	1.6112	6.83192	1.4748	2.21319	18.379	32.8624	14.0494	2.33477	7.74956	1.01249	6.955	3.65307	43.6592	4.67563	3.95703	3.88585	8.64847	7.95115	8.59378	5.40846	1.484	4.67304	4.00022	2.71239	5.82901	5.22281	1.25483	2.37765	1.70059	3.34784	9.55481	1.93187	3.62192	4.50989	2.18821	4.92131	8.10285	1.58948	3.28056	1.30729	2.09731
	6.32532	2.90214	3.95085	8.51228	4.29352	2.35928	1.04144	5.61057	16.3757	5.628	4.6662	3.17557	16.352	8.94276	33.2932	2.72022	3.14804	2.95385	1.9407	4.97945	8.21647	4.67836	1.93794	2.21597	2.11678	1.95876	11.1588	4.09552	7.46437	3.1738	3.86734	1.32794	8.68632	3.81342	1.30041	1.45945	1.99787	3.16951	22.6219	1.13156	2.72226	4.02435	1.77804	6.79062	36.578	2.98843	5.0861	5.95331	1.41246
	4.05092	1.91191	55.2737	4.55987	2.94245	1.07196	3.95258	5.4308	17.5338	3.54205	1.10058	2.90736	6.24351	6.44469	7.44921	3.37697	11.4511	3.6696	5.31716	1.57778	3.01616	2.44256	6.04952	4.29341	11.6958	1.13092	1.99031	3.37498	3.14194	7.26616	5.3153	1.5852	5.24461	7.17493	1.85321	5.01467	2.40779	3.74549	23.5103	6.55368	2.4651	1.71881	4.75036	1.45641	11.5433	2.1368	1.97743	1.23547	1.77136
	2.04102	6.76268	47.7977	13.7251	24.2357	4.41437	1.05832	5.6085	13.0854	5.85866	3.59755	1.23594	8.5415	6.24022	37.5094	3.26724	12.7843	1.29696	7.63499	1.24464	6.15999	4.80454	8.53447	1.59238	2.46629	1.68583	7.9954	4.6784	7.27248	1.95383	8.55554	1.20857	7.42193	20.1326	2.48978	1.8786	1.92053	4.92597	10.5546	1.02754	4.48985	7.8831	1.9072	1.41312	49.0948	1.61371	3.75735	1.4152	1.04095
	8.92975	1.66601	4.81885	5.07035	3.6136	5.0951	6.35703	6.64927	5.57547	2.85764	5.88557	5.26075	16.2939	4.33246	16.3603	3.16467	6.32967	5.7191	1.19352	7.02323	2.84044	5.63586	1.0864	1.78213	8.35519	4.21257	7.31312	24.1308	2.44792	3.30235	7.6666	1.32206	2.10912	1.33931	2.25955	4.44079	5.22938	7.83118	10.8503	7.85452	5.12877	2.42892	6.0234	1.46362	26.9519	4.37234	1.56869	1.42265	1.21128
	1.24045	1.45124	15.8969	2.17514	2.90924	4.26421	5.07866	2.84569	3.05812	2.45391	1.7645	1.09993	5.49082	7.83511	8.18873	4.08942	14.7017	4.60288	8.91718	3.9959	13.1523	3.7009	2.95554	3.29701	5.72985	7.3103	6.37611	8.74682	4.02382	2.89848	5.91229	1.31528	1.68213	6.90035	12.6008	7.30511	10.1992	2.37341	3.30348	5.62786	1.85203	3.17248	1.45607	5.97755	2.45889	2.34493	1.77991	1.74863	1.26876
	4.28053	1.33791	3.81466	7.34531	3.15002	4.86756	2.42963	4.17866	4.52258	6.3706	1.49593	4.7426	24.4195	9.43907	2.51634	5.66321	5.73437	1.11842	1.31123	1.61722	3.99148	4.19415	5.14241	1.29172	1.39751	5.60335	7.76553	11.6502	7.05884	3.33535	3.89679	1.02817	4.65416	25.1058	5.27136	4.25682	2.3406	6.46273	3.99105	1.58066	4.31892	3.05371	3.58096	3.70637	10.2234	1.44558	5.05738	5.27715	3.98223
	3.1834	6.10823	13.5814	7.10127	1.45162	6.11078	7.00939	3.2446	3.70938	1.04873	1.99081	10.5745	6.45847	14.234	31.1394	2.55037	6.01375	9.71153	2.22639	2.04973	7.09079	3.02785	5.19748	2.57943	1.25366	9.6395	2.02869	4.01277	6.12653	7.78527	2.86646	1.06841	2.60176	4.56424	3.82447	4.68947	2.82061	1.98742	21.0162	11.7927	3.8714	2.81199	3.8396	1.30618	37.974	14.3189	3.59032	7.191	3.957
	1.79208	6.30726	2.82433	5.11085	4.78016	4.82842	2.84429	4.37759	1.5276	5.1688	1.14753	8.3285	2.41282	12.5143	4.71406	5.97146	2.6105	2.29342	3.77077	3.16438	12.8917	5.31675	5.22477	1.2405	9.8221	5.67825	2.16426	5.90786	1.35039	2.58229	4.96706	1.59786	10.7961	7.87712	2.23266	5.00117	2.39136	2.5381	3.35617	1.7814	2.89114	8.11771	1.14388	5.34355	15.838	2.11514	5.00347	1.30654	1.62135
	2.96275	4.09349	38.3116	40.7845	19.5874	3.39318	3.03954	7.5279	15.1503	1.10208	1.21092	4.38218	6.42136	8.46623	4.15479	2.55148	10.1272	1.28502	1.55044	11.5195	15.309	4.02444	5.80821	2.26898	2.22974	7.84007	31.625	8.24596	2.38112	8.50682	4.9736	3.74824	10.768	11.9937	1.20574	4.4076	2.39523	2.17941	4.54032	10.1791	2.97839	1.46329	6.72151	2.01784	23.2851	4.65316	3.94383	1.00549	13.7832
	1.22725	5.21524	12.079	10.5876	26.012	1.13265	2.97541	1.46662	4.27529	4.45045	1.38981	2.80525	2.6999	70.3623	7.70741	5.06215	12.2892	3.63817	5.24846	1.643	5.13986	1.05687	11.4831	4.26446	3.65359	10.1276	1.41545	37.1204	3.545	11.3191	10.5697	1.84654	5.56772	12.121	1.6518	1.68168	4.54682	2.61722	13.8554	3.08799	1.66908	2.69406	4.53739	2.56823	14.119	10.0548	7.71752	1.36757	8.48458
	5.80481	9.83656	1.55443	3.14601	14.4447	1.22888	10.175	3.02701	6.12618	5.4816	1.30952	6.70052	10.6581	10.1658	4.06137	8.60344	3.64491	3.90599	3.69246	6.58742	60.269	8.0902	4.17615	3.83196	8.43776	4.92882	7.67778	6.29229	5.27133	1.23967	2.85861	3.49776	1.02859	7.57894	1.70128	6.93997	1.36318	3.42898	1.97116	7.47452	1.27503	9.23724	3.23128	10.8259	24.7758	2.42349	1.51744	1.3579	5.99823
	3.56388	3.38449	6.95176	3.29095	47.3924	2.93323	1.06221	1.28427	8.63944	7.86489	1.21327	3.81983	6.75395	3.16629	15.2257	1.72323	16.6779	3.23581	2.01143	7.33434	1.28637	2.50403	3.10805	2.48233	2.02004	10.4447	6.7211	43.458	4.41097	2.4365	1.68231	1.08197	1.52632	2.62785	1.46598	1.27097	1.46952	1.51547	6.83747	20.3911	6.13154	5.37933	2.47709	1.92448	5.9992	2.53435	1.89127	4.32487	4.81849
	6.73833	2.4058	33.4867	9.17587	74.5622	2.11109	1.51737	1.85154	2.06778	3.33442	1.32361	5.78385	132.313	3.24832	29.6362	3.37918	5.42964	2.18183	5.94588	3.51734	10.3381	3.88615	6.311	1.96654	8.77713	2.0618	28.462	19.6172	5.60489	9.0348	2.42723	3.76768	5.71812	6.94325	1.79634	3.6835	3.41664	3.28719	2.09497	4.0284	1.73816	10.8017	5.63465	12.6107	5.43453	18.8924	6.09492	1.41744	3.28687
	2.719	1.08642	7.97311	1.80924	5.91857	2.9234	3.99698	70.2989	5.56904	7.9925	2.11242	7.37945	27.8175	9.71073	28.676	1.57434	10.3601	4.59785	3.98623	7.10035	9.99668	7.78732	11.2821	1.77723	4.86318	11.9003	2.75647	33.8347	3.93438	1.82971	4.41523	2.49491	9.76239	12.0474	1.61752	2.66684	2.3232	5.3682	4.7155	1.66932	1.35921	4.36854	1.6117	2.9387	5.20817	2.87831	1.1816	1.34524	2.04264
	5.88449	11.555	15.1679	25.9209	86.5783	1.69767	1.09441	3.48446	11.5005	3.92941	4.7925	6.98741	5.51182	3.65312	8.582	5.66376	2.01755	3.06324	5.58214	3.51867	70.4128	1.97662	1.36703	1.02981	1.55352	14.5171	3.64914	36.1933	5.41546	1.84942	4.64172	1.97857	6.70051	6.81668	2.91559	2.92227	2.88394	1.87616	1.23157	2.69494	5.34166	2.61501	1.07111	7.85662	8.36142	7.75649	1.54041	9.135	8.33738
	3.37058	3.9242	6.85877	4.49024	12.7006	4.00826	1.84867	2.98816	4.53603	5.28458	2.54486	13.539	14.7836	3.73432	7.04171	2.01273	9.10108	3.95314	4.20018	1.82191	14.334	1.71061	2.47139	4.95887	5.0197	9.30224	8.4667	2.7899	7.83738	2.50102	6.71875	9.73865	5.89879	8.02156	1.50493	1.84091	12.314	3.18115	8.64201	5.56222	8.45156	6.13711	1.53515	1.08976	10.9001	2.39449	2.3495	3.48572	2.45271
	5.08015	1.71358	6.02453	4.8874	2.8525	1.73321	10.0323	1.77849	1.96781	4.99027	1.4762	7.79359	5.4089	11.7257	17.4735	1.68904	2.81915	4.14897	4.05544	3.85467	38.0414	1.93411	6.94986	3.87962	1.88885	7.05496	16.8676	20.5545	1.23337	8.86439	6.95113	7.44494	1.30868	9.00692	2.08501	12.9044	6.57273	5.55216	12.1398	19.8572	1.08849	3.19966	4.61615	1.39063	3.04733	9.00715	1.66061	2.20263	2.06927
	6.77133	4.4793	18.672	9.92898	3.68187	4.33067	9.43162	1.74689	1.10726	8.15769	24.0545	2.40063	14.2039	2.36039	3.06778	10.475	7.45368	2.80611	2.20416	4.1574	6.23842	5.75947	4.87975	2.53044	10.3124	4.5423	5.19476	8.4627	3.64857	8.19604	2.65634	1.41656	4.83292	2.04079	1.05381	1.98663	7.62508	1.29495	8.20668	6.1568	4.67996	5.86862	3.11944	5.33464	9.3035	5.85352	3.61418	1.61578	7.628
	1.90948	1.34246	61.983	9.05189	1.18039	2.11668	1.16659	1.04492	3.77018	2.04079	4.17272	4.51362	19.7654	6.53249	9.23635	5.66982	4.27971	5.43525	1.05383	10.7693	16.0564	9.22714	11.2013	1.15854	2.89582	2.56845	12.1652	7.29768	6.8006	2.99157	2.96793	1.19953	1.72994	2.21668	1.58012	3.04155	4.71166	3.06467	3.62092	3.02044	1.43572	4.48898	1.39748	6.40276	7.78547	1.32738	2.98007	1.17853	2.79338
	2.56153	2.17529	8.09711	1.91297	5.09935	1.06204	2.60502	5.84628	2.43668	7.15957	5.10145	2.00402	6.08457	24.3826	4.22078	12.8506	8.91423	1.01343	1.57393	6.32104	6.4507	2.93019	3.67998	2.61908	7.76306	8.70159	1.47061	14.8531	2.26074	6.71355	13.484	2.24533	2.40387	4.04009	2.81391	4.32883	5.19022	5.55457	6.10973	3.60733	1.93135	3.98462	3.60018	3.71443	6.51434	3.17124	5.16343	1.67309	1.90945
	4.36775	1.27705	6.08598	17.3524	1.91197	1.89257	1.74884	1.4345	2.34606	6.48275	4.77842	1.8642	20.3669	4.61153	2.19979	6.26923	2.63171	5.94542	2.05538	7.8748	8.98185	2.72957	1.93353	3.15893	3.79745	7.56413	10.5492	9.80493	3.17423	4.99613	2.78922	3.79436	9.13561	8.78453	1.03549	1.67943	7.54823	2.38707	2.4381	17.847	9.66288	2.31558	3.47605	1.13135	2.25308	6.10021	1.58548	1.18672	3.73969
	1.32768	1.32812	13.857	16.448	5.76404	2.66808	5.71804	1.34488	4.29107	4.53744	2.78713	1.62608	27.3484	13.0159	2.93765	7.33018	9.68459	1.5082	4.38079	17.1359	10.6211	1.2696	3.66591	1.46054	1.78247	2.47648	3.3188	10.1901	3.00453	5.84622	8.22039	2.27924	8.36799	3.61249	1.85789	2.83113	7.42786	1.16883	5.74224	5.70962	7.23283	2.91905	4.06233	1.58965	9.87985	2.27923	1.08483	1.92502	7.42752
	2.48043	1.58976	9.21146	1.72114	11.8883	1.81221	3.78797	1.34902	1.07628	1.33819	8.2614	1.0443	28.6752	1.63364	4.26965	1.23797	6.76584	3.66269	6.38641	1.78357	15.6221	1.7574	2.52477	2.51396	6.65731	1.70041	7.67239	22.5382	2.72656	2.99403	8.25508	2.85436	4.41454	7.15133	3.96199	1.62148	5.59241	5.34169	8.8982	6.77132	4.49189	2.13826	3.58033	1.62445	4.50414	3.37681	3.10601	1.12606	9.91457
	2.47006	1.32847	2.06538	24.5404	2.12231	3.25141	3.26413	2.87471	2.6635	1.68343	9.61975	10.9779	51.4535	6.92328	38.5919	2.66783	4.34454	4.1342	3.97941	9.07185	18.9246	2.25936	10.389	1.81197	3.72552	3.76271	5.96323	3.20436	14.8447	1.81642	5.7362	1.521	2.54918	2.81519	1.39702	1.04142	5.65766	1.02624	1.59115	8.99299	4.72986	1.15967	1.27304	1.42373	3.40821	1.5201	1.69153	3.59959	17.04
	3.66902	2.92907	4.38707	15.0249	7.79917	4.57337	16.2056	2.86124	9.40003	6.12751	5.9405	1.12012	10.5097	9.03221	13.3167	6.00565	2.95884	4.79211	3.3219	12.5075	15.935	4.49909	4.60827	3.10815	5.64374	3.97231	4.50111	10.0429	4.34192	4.24701	1.45909	3.40642	4.89155	7.88499	11.722	2.92452	2.77131	1.04713	7.64886	8.09442	1.32518	2.82662	2.97106	1.52643	5.85058	1.02123	1.61818	1.31808	3.25462
	6.61999	1.86259	4.35385	3.95703	2.51208	2.94523	1.82726	2.01007	1.99821	8.96182	4.33189	6.21285	9.05194	15.4373	7.36569	1.2137	4.75713	5.90204	1.17053	1.91092	13.2284	3.23717	1.29772	2.2133	1.06016	3.37971	21.2602	29.3745	2.06796	3.54664	4.59786	1.67156	1.67736	1.53524	3.60047	9.18428	6.20342	2.39189	1.56876	6.50954	1.27093	2.13617	2.3117	2.10907	50.8605	5.21663	5.59117	1.33668	1.0094
	1.23432	1.12385	3.33915	12.1009	19.7387	11.6913	5.99365	8.29515	13.5192	5.57586	1.97109	3.70287	2.27699	21.4941	2.91951	5.33952	3.04548	5.1602	3.26355	4.26779	5.36836	2.23717	1.36974	3.36337	5.95779	10.3407	6.44071	38.1221	1.58667	2.40104	1.76413	1.73531	5.12034	2.7773	1.82088	29.9659	6.45865	1.17968	1.20258	2.52298	4.35116	1.68075	1.51688	1.03587	10.37	2.43964	1.85769	3.05703	8.84909
	2.92126	1.06718	4.19719	34.1376	5.33137	1.90393	1.37638	4.30558	6.87039	2.31934	7.76088	5.61393	24.993	63.6402	38.8346	5.53307	4.29975	3.8274	3.42345	11.1749	6.37286	1.78693	2.40852	8.90397	6.35998	2.56343	7.72272	6.59032	4.11932	4.61344	2.54048	2.71058	5.23218	2.05509	5.56899	4.62421	3.29676	4.24395	5.07048	1.47433	1.19443	12.4419	1.28249	2.6094	4.49286	5.75405	1.93678	1.70584	1.18184
	7.22065	1.57577	8.07165	24.9397	14.0738	2.69947	5.18966	3.70463	5.05224	1.11905	5.35594	9.67646	5.0644	30.5474	6.29745	5.54961	3.34372	4.56641	4.24767	6.67952	54.9381	6.7214	4.65454	4.19097	1.70092	3.64711	3.94052	8.83542	4.46611	1.87552	2.49269	1.53999	4.43557	11.9794	18.4683	4.35809	5.10224	4.26042	2.42361	2.96363	2.61582	1.00243	2.61413	1.2769	13.8165	2.98476	7.46256	1.09071	3.50066
	5.53701	1.3631	11.7507	11.3379	4.49555	1.39131	3.2161	1.03508	1.44517	5.8726	3.39565	4.89842	13.3419	8.34091	7.11039	1.17841	2.67769	3.09153	4.2219	3.69846	12.7457	6.70945	1.94403	1.12246	6.89436	3.09823	4.79905	19.2298	4.63424	4.09235	3.71613	2.91721	6.02179	2.87955	3.32231	6.22375	8.00213	2.44612	5.65596	4.86747	2.04624	1.23997	3.07124	1.89732	6.51112	2.57473	7.41218	2.08801	8.94793
	3.53843	7.69764	6.64674	5.33145	6.85172	3.26512	5.00635	1.79352	8.42489	8.39229	3.02894	4.73383	6.21411	8.56228	3.42579	1.753	3.73922	5.71407	4.78014	9.85204	1.41049	8.92596	2.50173	6.03858	8.47929	9.82748	4.5713	22.0322	6.33097	1.72037	1.75431	1.85378	7.53791	6.94468	3.05116	3.56085	2.76889	1.91994	4.62527	14.4604	4.80099	7.67107	4.31341	7.8859	3.75902	7.53697	2.14845	1.98047	1.83094
	2.31353	8.61582	7.14718	10.1244	5.06061	1.53687	3.41758	1.55884	14.1921	7.19958	12.0087	8.50528	14.8529	19.5389	9.56568	4.50961	2.72661	4.81537	2.96776	3.76058	2.62256	5.35312	6.14476	2.01598	4.17785	1.36968	6.10169	10.9004	3.67861	3.6811	5.33755	1.18958	3.86328	3.19919	19.1021	7.3113	9.37063	5.9494	1.31586	6.18059	3.78081	1.38467	3.72902	2.56738	11.8784	1.72603	4.31059	1.50005	5.93865
	1.52145	1.97627	2.89352	3.97159	5.87891	2.996	5.73674	7.26629	10.8224	4.67414	6.19405	1.0885	9.43004	23.2972	6.58328	2.47372	3.0779	2.03126	1.42616	32.006	2.51524	3.957	2.40988	2.60794	4.28371	2.81877	3.7039	19.4334	1.37415	8.7186	2.29893	3.53257	1.63466	5.69261	24.9235	1.28841	7.5695	4.91834	8.47736	7.89943	3.37372	3.31341	2.12268	1.16869	19.9691	9.91898	11.626	2.4326	3.27705
	5.04243	1.50126	6.47957	1.8334	2.74733	4.48336	1.8501	1.15527	1.70357	5.36248	9.62069	3.66058	33.3545	9.99104	17.3535	2.08331	10.699	2.75613	1.00433	5.9163	13.0541	4.18715	1.17401	3.23643	3.90078	8.04565	36.0368	38.6508	11.1338	1.94743	2.52084	1.84338	1.77136	5.93001	5.2998	1.51852	5.47688	2.23404	5.77583	9.81633	3.54567	1.00619	5.63874	2.13411	7.47333	2.1401	3.78607	5.00066	2.34195
	1.17162	1.01647	5.23735	1.28846	3.48168	2.5549	3.11289	9.20382	10.26	2.62547	9.87095	3.37445	8.81668	50.6782	2.95725	2.42079	41.3536	5.42362	9.33624	2.78343	9.82361	4.26689	4.46389	5.45106	9.10384	9.03182	10.6958	56.8203	16.2128	3.96873	3.65787	5.57941	2.12219	4.64074	11.6912	4.87289	6.97347	5.64816	4.08325	10.5829	6.64867	1.0798	1.19491	2.58181	5.36283	5.44239	1.86343	6.43744	3.64436
	3.39887	1.05844	4.92956	2.43411	28.8396	2.42232	4.26234	6.67984	10.2442	6.18843	6.69504	4.51934	22.4009	4.79538	15.2323	7.69193	8.33308	5.39187	1.89574	13.3269	44.3164	2.42225	5.59012	15.5866	13.6509	11.4354	18.7764	38.7811	12.5454	3.26049	8.57714	8.53777	14.0797	1.76549	15.7393	3.63287	2.30096	32.4711	2.73578	6.87611	6.73285	1.37672	3.64869	1.07363	2.42667	4.69721	2.93677	3.22375	2.21227
	1.5917	1.55058	1.3712	2.081	2.28145	5.5757	3.20195	3.37308	9.65083	4.0943	4.22672	2.42883	31.6286	11.4449	13.1876	4.78753	3.10206	3.83809	3.68766	11.4305	24.9882	6.79909	9.45548	5.21455	2.41716	1.62803	14.8137	19.6392	13.2515	1.05892	6.25595	2.20328	17.8806	3.94142	4.99086	6.68116	2.41359	8.06414	3.69205	1.32195	1.53295	4.44799	1.18357	1.58286	4.11587	16.7611	2.41048	1.82901	3.46421
	2.07968	1.22843	2.79333	13.5787	28.0365	3.27504	7.42573	6.6125	12.2828	2.06412	5.56018	5.41696	4.29421	27.466	6.09535	1.76845	8.90127	1.57673	5.49045	1.75559	7.809	2.08589	3.96128	5.60919	6.19029	5.9934	3.26596	80.3324	30.901	1.14757	1.02706	1.73577	1.59897	3.18345	3.33399	10.4575	6.8676	4.17286	3.50435	1.8029	4.30408	7.7016	2.00234	4.63826	6.99565	1.3483	1.51478	1.8104	4.49254
	2.1603	1.63978	4.62399	3.02026	10.0599	1.6699	1.28771	10.8844	3.61585	2.95676	7.28383	10.5219	15.2359	5.83501	18.7519	3.33727	3.47693	2.1614	3.2638	17.8436	31.8994	8.3154	9.10759	5.79582	1.80223	4.56341	4.87715	43.8688	12.707	6.43626	1.29086	1.41701	27.7325	4.83811	3.62384	1.24846	8.0118	5.33044	13.0631	1.29776	1.99174	3.09636	3.37776	2.65777	13.8902	6.58843	1.61111	1.43307	2.8109
	1.36728	2.47505	8.95016	10.7716	51.5715	1.14149	10.5926	3.80203	9.7584	5.56738	7.87685	5.18569	4.60299	3.22276	16.1523	6.6999	4.8868	1.74899	25.366	1.4143	31.9675	1.13489	1.4504	2.16252	5.51204	2.16685	4.03713	8.40486	2.93907	1.91098	3.05761	2.46823	3.59211	3.68185	6.27296	3.54791	4.59709	27.9423	12.2063	2.62623	3.43718	4.11385	3.72052	2.01614	43.0573	1.28553	1.54439	2.06754	2.71207
	1.4677	9.41892	6.12915	8.29381	9.3615	5.84915	3.4477	10.5622	8.73824	1.31364	4.10464	1.15822	11.2974	16.7832	9.29285	4.27911	5.67366	3.67935	5.07113	1.44228	3.51532	2.70891	3.71505	9.58992	1.1792	2.17942	9.10501	20.2301	44.3264	4.47504	3.21471	1.42605	2.55077	3.77052	1.58636	5.44058	2.69976	5.10029	8.03611	32.1658	2.60225	3.11268	10.2391	1.37154	7.56677	3.3412	4.23503	2.69942	5.51035
	17.6756	81.5449	4.40699	16.113	48.7596	2.05725	1.42623	11.9583	8.09867	5.73408	4.53567	13.9794	4.6373	52.5662	20.8414	10.2886	2.45961	4.82543	5.53945	7.04373	9.34922	6.4513	4.5554	3.77895	2.41665	10.6463	6.46173	28.7155	9.88516	4.43219	2.49073	6.82732	1.01935	8.83101	3.00169	1.64118	5.21971	9.6487	5.11263	6.37405	2.0598	1.70877	1.004	6.23344	4.51219	2.78103	4.23945	1.57931	1.34236
	5.20462	20.0845	7.58892	1.02522	29.1593	2.69866	7.27267	3.63677	3.76843	10.2909	5.54657	2.59151	15.2191	11.5369	8.60159	5.6588	5.09604	4.667	1.13264	2.37185	2.58158	1.97679	5.0348	5.9241	2.15731	7.31985	10.4198	46.7349	9.76097	1.41206	1.72027	4.51372	6.05366	11.0498	4.27911	6.73855	3.99575	2.82448	6.16901	2.53411	1.48715	3.01942	1.04685	1.98855	16.3966	4.54524	2.32388	2.57141	3.62263
	10.4984	11.1098	8.12313	5.27711	17.8526	8.62266	7.97644	3.12026	1.5615	5.23639	5.28551	2.53398	18.5492	7.20936	2.17525	7.12395	9.93981	6.00075	9.1046	2.63713	79.9717	6.13817	2.64526	2.43779	1.25315	2.72276	4.46293	8.73437	4.51162	9.31357	2.72835	1.32025	5.62826	3.65254	6.64228	9.73509	1.72041	1.89504	22.0799	1.63055	1.49815	1.32863	6.47704	10.3837	10.5074	1.57332	3.04547	1.17667	3.64997
	44.0387	5.47408	4.59576	8.67605	27.8682	4.19512	1.77247	14.0109	5.03178	6.79191	2.30962	4.52658	2.79582	62.0444	7.12998	5.72111	3.53705	1.60942	3.20066	1.66525	8.69587	3.57591	3.44172	4.93571	1.09562	8.66238	6.35933	61.9263	26.8861	2.71231	1.88654	1.92747	10.4793	13.4739	20.1625	3.67563	1.70542	6.30447	3.85011	5.51617	1.36714	2.74466	5.02632	5.21837	7.59697	2.1434	12.1828	1.93804	5.27132
	3.38755	7.64413	10.2057	4.47461	32.5736	1.94415	1.01288	6.77776	4.61378	1.55097	7.58011	2.75344	11.1098	20.6841	22.4728	4.34639	1.13756	2.35723	1.19781	4.09681	6.6102	2.48747	2.80184	4.20344	3.96359	5.41889	7.41648	6.96451	5.97028	2.51382	3.36658	2.03282	15.8533	1.55884	3.67916	1.5129	3.6187	4.48254	3.20997	18.8849	1.25328	1.07394	4.41233	7.70682	7.08103	2.08431	4.00525	3.4727	4.42384
	15.5658	2.62441	2.63723	26.8825	23.3768	1.03138	7.66967	4.26466	9.29129	1.20544	5.1254	3.42322	3.91051	9.73175	11.1501	2.38329	3.45571	2.02309	3.24082	12.7674	19.2448	8.34733	1.04454	8.24385	1.22377	6.53876	2.60953	5.81559	10.0878	6.09347	6.05826	10.812	2.1343	6.39694	4.86464	4.254	1.2926	1.27567	3.91861	1.17609	5.66124	6.32153	6.7026	5.56592	32.5314	2.98183	1.91646	3.3365	2.82633
	11.7228	4.78046	6.8953	10.2643	6.01498	1.51496	1.27694	9.06395	14.8603	2.57485	7.03451	2.81973	4.45315	1.30922	3.26411	6.90173	3.58774	1.11622	3.11932	10.6985	68.3162	2.25117	1.75831	2.15183	1.54086	7.34498	4.97608	18.7458	3.74922	1.53666	1.55793	2.00524	9.43705	7.37157	2.97169	5.1964	1.58457	2.87951	6.23091	11.4503	2.13809	4.3309	7.6499	6.56147	2.63973	1.01095	2.97566	4.10457	3.54622
	8.24139	1.71988	13.066	3.54566	2.77178	4.02729	1.80285	7.81387	13.3427	3.56903	2.58054	5.16664	4.51337	11.6189	10.4549	2.28679	2.91817	4.24956	3.58283	5.96763	7.86885	5.67478	1.18113	5.28893	2.07778	5.26659	9.79981	34.925	12.2248	2.41434	1.8309	3.66188	4.99957	25.2638	4.18717	1.52246	5.21632	3.28318	14.1998	1.45552	5.83217	1.07018	2.75211	1.73564	4.23589	1.14273	1.66502	3.35362	10.2475
	12.5568	1.77584	59.5268	5.67035	73.9362	1.55067	5.78334	7.11294	6.44655	5.16789	4.95965	2.0364	18.7095	75.0707	13.3674	6.63759	2.89754	3.9896	3.10063	6.14367	16.2749	2.20746	4.46627	5.6181	1.76171	7.14292	7.86214	2.35787	7.806	4.78976	3.92363	2.88058	3.77533	7.34941	23.3317	1.03973	4.14705	1.21784	6.77162	17.786	1.01301	1.02919	1.05535	5.21539	31.6647	6.08442	1.17718	1.5328	6.25128
	10.2126	6.34224	26.9319	5.79078	15.9978	6.70168	4.27662	9.96485	5.76313	4.44711	2.25093	5.81205	37.6473	102.715	15.7685	3.68026	1.24365	8.51452	1.29128	10.7622	7.24675	1.86564	2.71439	4.27382	2.56709	9.26956	9.62587	9.86791	4.85303	8.56346	1.46956	1.68241	16.3651	5.16132	10.1263	1.34636	1.90845	3.46674	10.3669	8.89549	2.76294	2.52928	1.20247	1.59348	9.86858	19.8982	6.36226	2.95432	1.89754
	12.1565	7.9292	8.80291	5.81742	5.89413	2.48789	4.79876	4.1253	2.63018	6.58459	1.01654	5.76556	6.90589	45.3977	7.4752	10.9239	1.95272	1.92187	1.82122	9.89016	20.8481	2.15641	9.98251	3.10681	14.6397	2.22415	4.20876	136.255	20.2263	3.0689	1.75955	1.49975	5.32969	5.00972	16.8628	1.2434	3.41519	4.19214	6.59446	4.20766	3.34148	1.24206	2.87592	2.81733	12.6887	1.79027	4.31766	1.10373	1.25264
	13.7572	3.66606	8.74866	10.1045	19.1917	1.57646	26.5258	5.39661	2.52203	15.6455	6.69645	3.97909	6.08036	17.1579	4.95927	4.67008	9.06218	2.05358	2.63964	2.92091	9.74401	1.1523	3.0584	4.88894	2.06968	5.29474	2.20205	9.68338	5.44864	6.20724	1.44207	7.50056	5.97463	13.8965	3.45009	2.84182	3.79224	1.45964	1.277	2.88494	3.95686	6.19231	1.39275	6.11928	1.75002	2.49397	1.38796	1.2671	1.31362
	14.1683	1.11615	10.2998	7.78937	8.08563	5.18456	1.80051	6.27679	9.21587	2.5891	1.03672	5.82881	9.76612	2.1114	1.4349	3.93171	15.1248	1.36926	5.78447	2.7691	5.89139	5.97614	2.19636	10.2634	1.73891	2.67501	2.04296	27.6991	8.84524	5.00746	10.4336	1.54949	5.9262	3.16701	8.7643	2.07833	6.72307	3.17473	3.27648	1.39564	2.01348	1.08941	4.77367	3.8655	15.3635	26.9671	1.8705	2.50963	2.91465
	5.74729	3.1225	87.1949	1.68207	5.91857	1.61687	4.35555	9.54004	1.31831	2.96585	8.19801	1.9945	7.22867	9.902	12.2891	3.29536	1.89672	2.25319	2.17385	7.2299	70.5971	5.0113	5.08073	3.67829	3.75844	3.27616	1.97142	27.5117	17.5768	3.19301	4.96378	1.31392	14.0112	10.269	7.02718	1.93599	4.74211	5.90281	17.23	4.38729	1.32083	1.73094	1.45544	6.96376	2.30302	7.12621	1.50197	2.05378	3.02821
	7.73362	9.24857	31.5459	40.9863	20.3282	31.2487	6.16048	10.3534	13.7805	7.72546	1.28088	2.9706	1.12519	11.6032	13.6858	7.19178	8.55234	1.57107	1.15083	3.04716	16.45	1.20489	2.15688	9.43001	1.76576	10.304	5.07327	6.38456	51.2481	2.67931	5.53721	1.72039	6.60332	1.6332	11.0784	2.08734	1.59231	5.70238	1.69916	2.63545	3.04799	1.65441	2.75495	1.10418	12.383	1.66326	4.7812	2.26366	7.77099
	37.3696	5.32927	24.3024	4.78012	1.81695	22.1402	1.2881	9.66956	12.8697	6.33089	1.07053	3.59657	22.3736	6.40223	2.47448	7.95276	1.15524	3.49011	1.26298	40.9987	37.7613	1.38024	2.77439	2.91662	4.37742	14.7945	2.9794	9.32091	58.0554	1.15398	11.6354	2.10697	1.68055	1.581	3.88914	1.42344	9.62199	3.03816	1.31257	3.02006	5.509	1.18017	7.7693	7.34611	5.82843	16.3419	1.80068	1.16923	8.92059
	19.8322	3.31313	7.58892	4.14957	5.4716	4.00267	1.96681	5.30543	5.01951	4.73294	3.8849	5.68136	9.22348	8.73499	9.04167	7.27504	5.10134	1.47551	1.26172	5.75986	11.523	2.13507	2.73812	1.35096	10.667	6.05975	18.4127	22.9614	55.4911	1.17713	3.95243	2.30818	1.71432	6.02582	10.7979	4.47568	3.25615	1.19936	14.6082	2.63199	4.45428	4.97325	2.99563	3.12881	5.7664	1.68932	4.20233	1.24291	3.11723
	31.0632	2.59223	1.70555	12.3276	16.5532	2.65176	5.59043	4.64698	12.3114	7.85034	5.27518	3.42703	5.69667	7.40228	7.60037	2.85146	12.0552	4.16217	3.52373	2.26653	3.97172	5.91313	3.9201	7.18331	15.5099	1.98088	3.83986	3.25489	2.7705	3.83772	5.86647	1.18596	5.08688	7.29292	3.41503	10.242	2.73408	2.6606	1.90333	1.48738	5.4046	6.07229	2.4437	2.63274	2.26073	1.01535	4.29424	3.27436	11.6123
	12.5785	2.60412	4.89635	13.1908	4.3009	2.21868	2.18907	2.18465	7.11301	1.26212	5.39914	3.02204	6.80926	13.9105	6.84147	1.95814	1.17705	3.79031	2.42846	7.33566	10.0144	2.97253	2.98265	3.94554	10.5095	7.78981	2.31044	2.49846	3.57885	1.14905	3.9328	1.0978	9.20986	19.3746	23.6414	1.14775	6.55581	4.91191	7.77201	25.2782	1.23511	5.18277	1.51498	3.49758	4.03853	1.86332	1.94651	1.53019	2.00899
	9.34559	2.15046	62.9058	6.7613	10.213	11.4253	4.44422	4.5729	5.18554	5.83714	3.81447	6.66433	4.89006	1.55655	4.67571	5.32683	4.03923	2.12934	2.72704	10.7228	11.8456	7.24301	6.01072	3.01595	11.3235	7.62646	1.09669	12.7186	14.683	8.41865	11.1942	1.17556	8.25487	1.38722	13.461	1.45382	4.90695	3.69769	27.6752	4.44909	2.18748	2.18343	3.5567	7.34781	22.4635	10.3532	1.78124	3.89358	2.00338
	25.4701	3.41736	11.2259	7.43732	19.6229	4.42194	1.08155	12.7302	13.1071	6.07447	2.55753	1.72818	29.577	13.6413	9.30358	7.95772	11.7988	1.84989	3.99381	4.31141	1.10829	1.65785	1.42414	4.35845	15.2911	3.11783	4.03848	2.05472	14.1244	3.46291	2.06524	1.26554	5.7178	7.06981	16.3887	2.36865	1.19495	3.56072	105.873	5.56376	4.75391	6.5804	2.61728	5.14665	4.98584	3.23071	2.57045	4.20914	3.14527
	12.3918	3.78044	16.688	14.1315	9.70792	37.2179	5.58614	11.3336	11.8537	7.7679	2.60167	2.86011	74.418	7.14217	6.21042	4.18096	6.41632	1.91433	3.37545	6.37238	7.70493	3.09239	4.08041	3.53041	17.6221	5.6501	5.69769	1.15111	9.27094	1.25839	3.25464	2.03282	7.12208	6.29254	7.60999	2.76136	3.84976	1.43714	4.01081	1.57989	2.70793	1.90114	2.12079	8.89715	25.6759	14.0109	3.78917	3.81431	2.72398
	30.8307	8.70571	14.1643	8.60713	4.47664	29.315	6.0992	6.15557	6.8663	4.13492	1.84244	3.31578	20.1596	13.3441	5.73487	7.2563	1.91912	2.41727	5.4326	8.41153	11.4508	2.22504	2.09045	1.70418	1.51807	2.81123	21.0963	27.0972	7.16151	3.39051	5.14249	1.47307	3.96461	13.4718	11.1423	5.89855	7.97458	7.23913	3.39042	17.7706	2.01963	5.92132	2.95751	3.59052	8.92812	1.26313	2.64645	3.90883	1.27016
	12.0358	10.3707	5.79923	11.3233	7.94771	24.6875	3.7842	5.73024	7.82917	7.58149	7.93038	8.70721	5.62385	3.73226	4.7184	3.74643	3.68028	5.73387	3.92712	2.75941	43.3927	9.05726	2.61696	3.79053	4.65601	5.86724	1.60232	3.1619	19.2377	3.23882	4.92516	2.20328	2.68874	13.7428	4.65661	1.01216	1.25393	1.51185	10.438	2.3729	1.07058	2.63551	1.00022	8.68285	2.16688	7.69225	1.41978	1.80631	10.6057
	12.3498	1.53554	8.98559	14.1883	6.64969	27.4489	1.0282	13.5322	8.88557	2.29842	2.12228	4.59973	12.0424	9.23337	14.0036	3.67199	4.68817	7.45394	2.88415	8.80636	8.55995	8.54965	3.01671	3.30146	1.48109	6.99464	20.7927	15.7296	11.7381	4.12141	4.23522	3.48148	4.13094	1.55883	6.05129	3.19402	5.01765	9.03094	46.2053	6.15142	1.53858	1.12998	3.13929	2.23723	1.35329	1.11006	4.61152	1.70584	4.26683
	7.52899	2.03573	3.96303	14.8409	13.756	16.6152	5.10722	3.89787	1.62874	5.07575	5.56958	1.7198	19.7143	3.28913	1.94655	7.53973	6.7788	2.85923	2.80433	2.6889	11.8005	3.7598	3.59101	3.40614	3.55685	3.19624	7.17061	13.5548	16.2545	1.06237	5.82523	1.80992	2.83437	7.77558	3.97563	5.55423	3.974	3.44344	33.347	1.46934	1.13276	1.09025	1.22579	3.55148	5.21381	2.61327	1.72998	2.2711	10.3029
	84.9019	2.29247	3.58715	7.68706	10.7093	24.4427	3.23258	7.1606	6.89904	3.33655	1.73586	2.08708	11.1861	13.1796	13.9011	2.2719	7.65467	2.09256	5.60007	7.07148	3.89123	2.37564	8.58633	1.24406	7.56096	3.45058	8.61943	1.7047	8.73451	1.65339	14.314	2.56545	2.66389	12.1074	6.16661	9.62257	4.72713	4.47571	7.75357	4.47058	1.15502	1.34619	2.83465	6.64082	1.13862	15.2891	3.05608	1.50526	2.86768
	17.3607	2.01999	5.18089	13.4324	25.0489	22.0477	5.17928	4.83141	7.04169	7.38356	1.43019	1.91449	13.2915	2.53311	16.6724	3.07423	12.6146	2.8498	2.29737	6.82427	2.58629	3.82024	2.87589	4.15979	18.5572	1.0314	1.75389	22.2094	7.22383	2.39464	7.59394	1.05484	3.92414	1.71686	2.71028	1.31485	3.94354	2.82368	14.705	2.5226	8.22614	1.86142	1.60823	1.46659	17.7185	2.18121	20.0961	1.03526	1.18605
	4.06035	1.12735	13.9871	5.31902	9.69961	11.2199	6.06778	2.61464	1.00788	3.48234	1.69266	5.58573	14.1128	5.45576	5.40512	12.0444	5.38721	1.36109	1.88437	4.28608	44.9853	4.54399	8.43839	2.24091	3.02853	3.531	14.051	4.53487	7.90194	1.4884	2.65438	1.05575	14.6986	9.39233	13.0905	1.39981	2.59487	2.83091	13.4102	2.30995	3.58174	1.16009	1.04685	6.71593	4.01719	30.5495	2.83602	2.60639	1.84636
	18.2112	2.12142	4.1363	1.55382	8.46433	4.10304	4.0863	5.43754	1.49369	1.61826	1.79173	10.7691	10.0287	10.2965	1.60524	2.79411	6.4452	2.66749	1.21297	1.12985	41.5496	2.81887	1.15486	4.54107	8.63075	3.52296	17.1075	41.1917	4.9057	1.6992	7.27515	1.41203	1.47055	7.93433	6.90719	3.98676	8.06836	2.79034	18.5426	9.16802	3.43231	1.7577	3.35666	6.36032	5.40834	4.68914	4.47939	3.19509	2.36719
	3.8265	1.16442	8.25875	20.7592	4.76539	8.29763	5.37648	6.83215	5.62692	3.42384	1.11983	1.26451	35.747	12.5105	4.18201	2.18477	5.83987	1.66946	5.38764	8.8372	37.3429	9.68847	5.6274	3.52462	13.4412	5.84009	24.2162	3.26734	8.41417	4.72721	17.4606	6.46108	1.52791	27.1109	6.4771	5.82598	1.52076	3.01808	19.1307	1.81249	3.4753	1.24373	3.72241	5.98349	9.80212	1.32187	4.43167	4.43056	2.00198
	14.6233	2.11968	11.2647	6.25046	10.457	3.15356	7.70329	4.87337	3.98883	1.21999	1.93071	2.66809	4.81584	14.6401	8.17471	4.79801	2.97239	5.85426	4.55786	1.64124	30.7295	17.6802	8.3074	4.85598	6.36605	9.18964	3.4617	33.3565	16.9324	2.34243	5.82785	2.99724	11.5806	8.93327	10.757	2.02657	3.82559	2.93935	5.10407	2.27771	3.85911	1.36877	6.21493	5.02698	7.31907	2.8115	2.98714	4.40265	1.24142
	21.0217	4.03928	41.7776	3.94992	7.18984	16.54	11.8174	4.57653	5.56378	8.20921	8.90653	11.6851	55.3864	1.51409	3.30556	6.89345	4.14237	1.16809	3.08522	6.56759	2.68506	2.78267	4.09634	2.01687	1.83161	1.34404	11.8991	28.3809	4.86625	6.52738	7.26533	7.31156	3.31456	4.72942	16.5745	6.92309	1.37768	8.26498	11.6274	10.4788	6.93141	1.90156	1.94532	5.87528	6.97389	2.12358	6.23014	1.69839	1.56527
	56.2843	1.50091	13.877	38.6179	2.32112	13.3635	6.18839	8.93495	2.2116	3.73361	1.86779	12.1163	10.7114	2.2359	26.7313	3.70893	4.74475	1.04801	2.16678	2.05325	10.6606	1.34404	5.55386	2.31664	6.98402	1.60189	1.78128	9.64091	14.5219	10.2045	4.87214	1.08197	2.87961	12.0466	17.8613	5.71683	1.25876	2.90521	2.10419	1.07974	9.43285	1.65901	2.22002	3.31044	26.9596	2.36292	1.21342	1.89115	2.13867
	3.38897	3.41142	23.7865	14.1102	11.344	34.5619	7.62877	1.33193	12.371	11.072	4.42157	5.60402	12.8175	14.3049	19.3887	5.48951	10.1667	1.91464	2.19431	9.70464	102.539	6.69596	1.11047	4.1197	12.3228	2.47949	3.81498	18.9516	7.16107	6.98197	23.3258	2.47682	5.50718	3.38153	10.5867	4.56626	1.04027	2.81845	7.99923	1.58027	4.82453	2.32018	6.91935	1.7942	2.31349	4.9182	3.57132	2.53903	1.52882
	12.3536	3.10431	5.7007	7.64088	2.68506	16.1674	6.27706	3.32023	1.5615	12.6572	17.5069	4.39018	14.7388	2.78415	17.8944	3.8876	15.4455	2.16108	2.30773	8.50693	33.1793	15.7824	2.43937	5.31388	4.73959	1.3179	9.7734	8.83836	19.6116	3.92047	16.9913	5.7259	3.58382	3.15342	31.3064	4.85995	2.06652	3.2414	5.47683	2.12532	2.77164	3.64923	12.7811	2.36369	4.38532	1.8791	24.7509	2.68044	1.05917
	13.8736	5.92635	15.7658	14.7606	8.10639	1.16395	5.53408	1.92614	5.96775	6.39272	1.64195	3.92727	11.4396	11.0612	34.32	5.57277	5.27463	1.44219	1.45976	4.71396	7.60911	4.18408	1.00828	4.85821	13.8181	11.5777	9.29688	16.9986	11.8964	6.07573	7.56972	12.0523	4.25649	1.56884	9.80525	1.72276	7.62364	1.00375	52.2716	6.8669	6.0384	1.47625	3.72272	9.07623	18.5796	15.4675	9.28622	2.63988	1.39984
	54.3027	2.17739	17.7044	2.43872	70.2498	12.5311	7.67421	3.80306	8.18461	1.8368	2.35376	5.57964	53.0989	8.58124	3.10305	11.7648	12.1908	3.37727	2.85561	2.13852	1.49334	6.08746	1.9603	1.4494	12.6288	1.54308	5.7162	19.8413	20.5217	6.30722	3.1846	2.22589	6.65622	13.3366	3.75513	2.07271	12.3068	3.86679	2.28531	2.60704	8.94515	3.13317	10.4455	6.46599	5.75271	1.43897	1.50992	3.95423	1.90945
	4.42244	1.65342	4.66385	24.0704	66.8645	13.8792	3.58739	3.22698	5.19431	5.02392	5.72265	4.66297	4.49796	25.9638	19.4199	3.36263	3.36494	7.03964	1.93211	11.2514	10.6987	4.14976	2.13637	5.87377	9.94468	3.39478	14.5497	10.8132	37.2839	9.32194	8.50317	3.24275	11.0424	3.11194	17.4051	5.53622	1.83884	1.22346	11.337	15.9102	1.12355	6.3851	1.65486	9.75181	3.14359	4.53753	3.66986	2.81962	1.95782
	3.6992	4.99768	16.3963	17.751	8.29597	17.5322	1.00613	8.24749	4.5407	14.6207	1.09119	3.92765	8.65984	2.10564	7.73462	2.92369	3.47634	1.07567	2.47823	3.9265	15.9942	3.15744	4.81739	3.53531	10.7445	1.41642	2.95086	39.4775	4.16258	6.61948	6.02554	11.1385	3.6689	1.51307	9.68175	2.36021	4.85088	1.7641	8.63477	2.12225	3.70354	2.80237	1.00652	12.9689	12.2787	6.2129	2.52184	2.05861	1.06478
	6.25695	4.46776	42.5769	2.08633	7.70047	3.371	3.09679	2.39084	4.51381	2.37753	7.23735	1.76057	11.149	12.4149	3.37588	4.75555	4.06103	2.82183	3.33201	4.77939	6.36785	12.7069	1.0354	3.27028	9.82007	1.24703	7.12954	7.03407	23.4803	2.98074	2.69889	11.3153	1.18728	4.49917	23.2445	4.06665	4.40567	4.45683	13.5011	2.74484	16.9361	4.28197	4.09068	7.30834	1.38954	1.4107	6.34724	3.05071	1.30031
	9.08392	8.53362	7.69079	35.9372	12.4714	3.14797	8.59037	3.76007	8.45587	1.45428	1.14847	3.0689	63.6779	1.67321	8.92928	4.64857	10.4166	4.57899	2.54618	3.70286	16.5119	4.0019	1.33737	6.67241	3.61104	3.58026	8.05922	34.31	9.73273	12.7277	2.61772	3.27485	4.84312	2.35827	5.64223	14.28	3.77435	3.11849	1.70904	2.19211	3.10146	1.75812	5.55494	12.5097	53.0991	3.77179	1.42685	5.54062	5.07855
	5.42433	1.80207	6.4065	2.70693	12.9696	16.14	6.13698	3.96314	7.22701	6.67006	4.00228	3.04909	24.2424	6.90143	34.0224	16.5722	7.07763	2.22175	1.18619	2.16959	16.1617	3.84073	1.23383	6.85147	8.12067	3.37518	4.9539	21.5958	18.8391	1.49234	1.5252	4.24424	2.0285	9.69481	3.42594	1.92193	1.58796	6.15827	6.08207	4.59303	5.85699	4.96113	4.3509	3.01763	6.97389	1.07849	2.39678	3.91181	4.91733
	17.8991	1.41347	38.0465	9.15598	22.1355	10.2225	1.96409	4.67703	2.42206	1.19089	1.74666	1.59865	4.36003	35.3588	11.8443	3.96369	1.15524	1.19669	3.6571	10.1911	13.119	7.00517	6.21204	1.4592	1.15438	6.63677	7.46817	16.2927	6.71923	3.46291	4.12459	3.14735	1.57507	7.66904	5.54056	2.46598	4.31817	1.18651	3.42993	1.5653	1.89476	1.15298	3.46755	1.43392	2.96033	7.21798	2.67031	2.17955	3.92825
	24.6351	1.46139	4.11194	6.23945	63.5175	3.84186	8.38122	1.08067	3.80526	1.46701	2.37442	4.32541	15.3858	12.9928	10.179	3.62401	23.3872	3.46057	2.43251	2.1881	17.3319	7.04854	3.43799	2.1398	6.15483	6.53775	27.955	24.1469	5.44012	4.93703	9.39604	11.393	1.61554	3.33648	8.7308	8.27958	9.578	2.59513	14.4099	3.15094	1.10027	3.3569	5.68883	5.0639	1.36981	1.80862	6.30129	2.08243	2.4499
	17.8774	1.46628	11.3571	8.83271	8.92376	5.89857	6.99355	17.7109	9.94138	3.3714	7.03357	12.7789	2.27629	17.12	28.7975	1.58481	4.67932	1.26239	4.06908	2.66467	10.7901	4.78132	4.51965	2.64224	2.16541	1.74665	28.985	10.9524	4.98775	8.43737	1.47022	1.00466	2.17509	14.5479	7.1273	2.19086	1.93358	1.86772	7.38081	9.91421	4.45914	1.10489	6.20328	7.46196	9.26886	8.36585	1.36499	3.88651	1.97675
	11.8751	1.27251	10.1597	7.36343	1.48114	2.79137	2.29059	6.4089	21.5068	1.00266	2.78432	4.991	10.7205	9.28779	15.5922	5.55788	2.00694	4.70944	1.75605	6.53895	1.70238	1.26397	4.65877	1.06589	10.0024	1.20129	3.65261	57.2626	6.41391	3.82295	10.8388	11.4401	2.2095	12.224	5.93286	4.86051	6.32862	1.62873	2.20693	2.1211	1.88017	6.65359	1.20247	4.2521	6.29483	17.2456	2.29736	1.88185	8.23644
	8.00141	1.08013	1.19959	4.75454	3.67587	19.4749	7.22645	3.1845	5.9239	4.36922	9.24601	2.55037	3.77047	4.12347	12.3938	12.6758	3.93844	4.40547	2.00259	1.45395	24.4023	3.97254	4.94651	2.96918	1.24555	5.92052	3.70545	4.9281	18.415	3.43976	1.06633	1.35416	1.60375	11.5511	15.809	2.1903	5.24968	2.25613	31.2448	1.07936	6.28993	11.1225	2.92097	2.22747	8.54952	8.86728	2.81393	1.40925	2.08259
	13.0269	1.37009	3.88608	7.99576	38.4031	13.2608	4.50693	3.05913	3.98006	5.20972	5.17658	2.85135	1.59151	6.31278	20.4209	3.37532	1.54131	2.36258	1.71412	11.0469	12.3845	3.07019	5.98462	1.10865	6.03073	1.45965	8.38937	48.0273	3.40669	16.1611	7.72551	1.9121	5.13659	4.0923	8.83209	1.67831	9.95699	11.2987	11.6379	2.03704	4.10962	2.42515	2.91813	5.08469	2.66027	17.3319	2.27969	5.92056	2.17582
	11.7808	1.38374	3.55836	11.4466	39.4991	5.1484	6.97706	10.4342	4.32089	7.17624	3.55153	1.09078	2.56336	5.07075	16.1261	6.51407	4.37047	1.71095	4.87133	18.9735	20.6361	3.65121	1.94844	1.46054	6.66794	2.89667	54.2202	101.839	5.17583	2.20354	3.25333	10.1804	1.1688	20.5938	26.8706	5.05462	4.82671	3.74268	10.0198	3.32444	2.51039	1.89947	4.6527	1.13856	15.6906	6.94303	1.93148	2.02996	6.70832
	8.40499	12.4599	2.80661	31.1873	28.049	8.762	8.45457	1.95671	4.79267	4.47803	28.9935	1.99831	1.39686	13.9414	3.59118	4.81124	4.02331	3.75479	1.36908	2.93699	18.1492	5.15114	15.4762	1.0169	5.95019	2.96302	3.58241	10.8784	12.5855	1.00474	7.03034	1.59651	1.92272	3.79054	8.81495	3.53328	9.80133	3.53502	14.2328	3.33903	4.82786	1.75896	4.57362	4.60856	2.68685	8.85481	7.73918	1.36199	5.47811
	14.1636	23.0587	5.86178	18.2704	5.6681	9.0083	1.12011	2.25666	3.48314	7.78093	5.10615	9.14878	7.59626	14.8957	38.0912	4.98936	1.9757	3.38324	1.13643	6.77095	7.16685	6.99783	3.61524	1.26366	5.85345	1.70443	7.07573	4.96544	4.42531	3.25556	2.57714	1.66704	3.51819	10.6709	5.65899	11.1411	9.69595	6.25346	12.6423	10.5771	2.91058	1.98228	6.23951	7.00323	17.2694	2.16984	4.97784	1.45465	6.01085
	5.94955	74.7798	91.4641	8.09878	4.67222	16.0177	6.28666	5.58933	14.0606	11.002	7.73834	2.22843	1.86529	1.29891	3.42104	3.80709	4.70997	3.36312	12.2353	4.30216	17.6143	9.90651	6.59112	3.19545	2.89633	2.16786	4.61604	5.34109	8.22474	6.39932	3.20489	1.18687	11.4232	9.32797	9.60734	5.9008	4.12868	1.71991	19.2677	5.9453	5.11086	1.15842	5.04775	7.77217	31.3565	5.43688	11.4652	7.07751	9.79891
	3.48939	11.42	14.7217	7.16378	5.97623	14.2392	1.64499	2.99697	4.85932	1.56492	1.94574	6.94436	2.61167	10.2565	4.45938	5.81485	1.11752	1.3042	6.01989	2.53732	18.2482	1.66929	6.24576	1.17502	1.61937	11.8219	8.81613	8.12367	17.5439	4.04458	1.47676	2.18836	8.52445	11.815	12.9012	5.22059	4.31866	25.4484	8.6914	1.39487	1.12176	2.27376	5.22416	8.51989	7.43466	5.36163	3.72023	8.75506	2.31391
	21.8911	17.5923	13.1546	2.19716	3.83501	13.5996	1.07221	2.50844	12.9001	3.6933	6.79834	7.01941	21.1069	4.38028	7.14091	3.47623	1.49121	1.99386	2.17486	3.02997	46.9091	3.95375	4.65657	1.4053	1.70194	3.67274	5.94241	4.7919	13.9554	12.7139	1.82632	1.56079	1.25483	20.6596	1.34638	19.6198	3.18074	3.03254	11.7328	2.5963	4.355	2.7869	2.18821	10.2984	7.0625	10.4112	6.51118	4.66016	1.03324
	4.84724	50.8135	30.9392	6.05899	15.1491	6.37845	4.63402	14.1969	11.155	1.17391	7.91254	10.371	11.8499	40.5532	4.4831	4.49583	1.63325	1.0895	6.74712	3.40894	2.69244	2.27081	1.17571	1.31444	9.86769	12.1763	19.4035	16.2898	2.7492	13.7921	2.65961	2.30953	8.90682	7.4059	4.91763	11.9046	2.17093	4.03629	6.80257	11.6004	5.0822	2.36242	1.60855	5.23958	5.09338	5.39431	1.14802	6.92158	3.96611
	17.7011	18.4118	10.095	1.24903	11.8648	47.6098	3.31165	1.78264	9.8952	6.77221	3.80085	6.723	18.5331	20.2575	3.83597	7.38423	1.11516	2.17806	4.94635	5.74774	8.60742	6.75401	2.64628	1.21912	11.3265	7.49929	23.8836	6.87444	2.83663	6.29195	5.11368	1.53547	1.77805	32.5804	7.17717	1.50952	4.95046	4.49539	2.30308	18.4731	3.93332	6.43696	14.3021	2.61067	33.196	2.60336	1.4591	1.42413	3.86657
	24.8284	10.2364	8.40545	9.87427	8.36608	3.34331	5.68013	5.13603	15.1088	5.38127	7.21059	6.58584	19.8592	3.08054	5.42121	10.0372	1.12165	3.79314	4.18199	4.86664	75.6706	3.82263	3.71387	2.72375	6.16901	3.30029	15.9846	12.8079	4.18814	7.77936	3.59765	1.46855	17.8637	5.15203	4.0216	11.3684	4.14512	3.07271	2.92019	3.06727	10.8225	1.35246	7.20791	4.2992	6.46279	2.60483	1.31549	1.24254	6.73145
	2.21264	20.9558	40.9168	10.4572	2.86404	4.58789	2.45261	2.54211	2.43141	3.75422	7.51719	5.9313	1.9507	5.30736	3.09562	1.65705	3.72094	5.77631	3.33756	3.78064	9.716	10.6933	6.75787	1.01022	1.95774	3.35156	1.93304	15.9823	5.34149	12.579	11.5752	1.87141	5.97336	3.8363	7.77439	1.94668	3.30981	4.39738	9.18798	1.12619	3.08714	9.31377	4.98946	3.40252	1.86722	3.24723	5.1294	1.35864	9.31874
	22.2141	5.57272	5.28496	9.85616	4.91808	4.34844	4.31725	3.02909	1.62991	2.10232	3.73559	4.31817	2.94356	6.59804	29.0216	5.95657	5.75677	1.53241	5.86101	3.81919	7.81077	5.98911	1.29297	4.39675	1.39042	2.30105	5.05611	2.03714	5.83309	1.63024	2.4161	1.01958	5.37079	20.6524	19.8887	9.09314	8.01422	2.079	5.56837	2.42549	1.43341	6.60006	1.8171	8.11208	2.39727	2.77259	6.35961	3.5862	3.15018
	40.5922	33.9592	10.6917	1.48029	9.69823	11.103	3.54663	4.58378	7.55732	1.99229	1.31422	1.00621	5.97604	1.45556	7.18545	11.3854	4.02744	4.91879	12.3778	14.1884	14.5433	1.9633	1.31348	1.46143	5.3763	2.02712	8.23683	3.24976	6.51524	6.07278	3.96618	5.77835	14.1795	7.07768	7.66959	1.97425	4.52265	4.6187	58.7686	1.19374	8.95743	6.96348	3.45085	1.51285	2.77909	3.97589	1.00175	1.28645	1.76575
	10.2277	7.01417	23.2323	1.17798	4.17543	3.14968	1.74378	2.08467	7.38778	4.79538	6.89225	12.058	19.8676	11.3889	21.086	5.36213	7.46782	3.14748	1.58202	2.50272	94.8246	1.01452	1.31636	1.01111	11.521	10.595	31.3874	3.96078	23.5128	1.21456	4.66529	8.62593	3.31679	1.82841	11.1695	1.90898	5.38213	1.97617	3.90478	17.3415	1.98534	4.01264	3.40265	1.28411	17.4728	1.8714	1.07246	3.09201	2.41836
	9.13861	59.2659	6.62903	1.11688	4.87933	4.8561	1.07818	5.78412	2.04966	3.06375	3.32052	4.80432	11.0615	9.98156	11.4772	2.40149	2.12718	1.25265	4.11101	15.8157	12.9276	2.64711	4.17311	2.45828	7.56653	8.31406	3.84371	3.80994	22.7619	3.0157	2.86908	5.75801	2.25921	11.6148	16.7787	4.1938	6.62687	4.50061	5.65004	12.6963	2.9789	5.52821	1.15774	6.24659	8.91482	3.40875	1.18028	1.5127	2.32934
	65.2706	26.0916	2.54311	7.83412	14.5476	5.78863	3.38954	4.87648	4.61612	2.4724	2.97354	6.39496	76.2308	12.4178	5.94563	3.22092	1.25721	5.12594	3.48381	3.71938	11.6318	1.4458	4.47152	2.24181	6.94704	10.1115	33.2293	2.14185	14.2044	6.96178	1.11674	1.01234	10.9681	1.92566	11.8494	1.4842	6.79268	4.57733	1.45219	3.87372	3.25934	1.48043	1.9995	4.73502	11.3612	8.15698	2.59122	1.43232	2.41976
	7.44507	4.98194	30.002	8.32649	4.08409	20.4474	1.26512	2.55299	4.16012	8.01614	4.40796	2.47645	13.4015	5.58355	14.4041	1.9653	1.0739	1.10742	2.15819	8.07574	9.80061	1.96621	3.90587	1.62712	3.81771	10.4844	7.27571	8.8281	9.78518	1.8238	1.70391	1.29719	6.95862	6.0909	5.40927	1.36774	3.6158	3.77963	13.8607	9.18645	5.03102	6.43696	2.68438	4.37856	3.16494	4.21486	8.85803	1.54359	3.8904
	23.0693	1.61844	4.81886	1.11191	2.87234	4.25934	2.98216	7.61338	6.38634	7.21868	4.26428	2.41968	16.6538	11.5051	21.472	1.56	10.4821	8.89959	7.514	6.09476	46.3039	1.07001	2.93571	4.88404	6.7961	4.59909	2.38198	10.4588	20.0046	4.90156	2.72966	3.98607	6.05334	3.88136	11.0554	2.13741	5.24968	1.2817	3.65912	5.50119	2.30365	1.43485	10.2706	1.30321	38.2515	7.41033	2.0667	1.58154	2.79899
	8.84017	26.5876	20.4955	1.92754	5.06937	5.49913	1.34405	7.24608	5.47083	1.42276	15.5095	6.19418	5.63505	10.3039	2.62976	1.31131	7.56154	6.90259	5.59452	3.40564	15.36	6.09583	1.39617	2.9233	2.92723	5.53349	6.16861	6.7397	4.54188	6.01811	4.30003	1.18868	3.95186	10.4892	14.4622	7.60331	6.73709	4.98542	2.45456	15.4043	1.07672	9.27069	1.95004	2.19225	15.1364	5.66778	2.55587	1.42525	1.54214
	5.83781	1.28475	17.4923	10.156	2.95214	10.1392	4.15497	3.95537	10.5722	1.62948	3.52336	3.37598	8.5177	9.66167	8.86576	1.53022	8.29535	1.64997	9.94171	6.0518	15.8459	10.2965	8.94135	3.44489	6.30071	6.62621	4.47045	9.15982	4.63737	10.0652	1.28693	14.7208	6.47012	18.0331	13.9885	3.17658	2.67705	4.68015	70.8135	7.79195	1.92111	1.10782	6.58762	9.42972	35.0419	8.01161	3.10822	4.03015	2.24942
	9.94295	1.31973	26.8173	10.6267	3.36128	5.21477	3.97868	8.85465	3.5644	2.87219	5.76021	4.68011	11.77	12.3362	50.7219	2.12246	9.81839	20.2605	4.13804	5.98349	18.3355	3.251	4.03313	1.2641	6.06112	3.02183	22.2714	10.1015	25.2362	2.36705	3.09688	5.30225	1.06874	9.56896	20.272	2.10478	5.38261	2.73411	1.88686	2.70607	4.4924	6.16471	7.61493	3.19798	17.9763	1.39418	6.5536	2.01507	1.66341
	32.7081	3.7689	15.9512	4.6192	9.36934	7.05621	1.55229	3.65127	9.73267	1.24181	2.5904	6.48754	2.50454	28.6977	10.6102	2.66231	5.00822	1.68486	4.34593	11.0947	11.8247	4.21789	3.86604	4.82436	8.3552	3.21132	8.08391	54.9384	20.1734	4.03867	12.525	1.9537	1.10985	11.032	30.0726	2.60495	2.5997	3.45589	1.38962	7.71058	1.44621	4.97911	4.72704	5.09954	2.86407	4.6271	4.05032	1.63588	2.81721
	19.6096	4.6507	8.58868	6.50695	21.3956	17.0721	3.55026	4.02946	15.8039	5.68043	12.9083	5.4501	37.8553	8.60308	22.5326	2.809	5.7326	3.67212	8.14726	9.27214	9.55591	2.82587	3.74132	9.92755	3.5305	5.02784	1.01955	7.39581	12.2898	8.88803	2.26751	2.95971	2.83596	15.9688	14.5203	2.37596	4.1456	3.20445	5.38002	2.87419	1.40603	1.77067	9.56057	8.65526	2.46896	1.46577	4.25005	8.63635	4.08177
	9.35314	7.74067	30.6513	2.37443	3.55225	5.18772	3.88183	7.58178	2.23615	7.07167	1.66543	7.19391	9.3026	1.2849	11.9983	4.57909	6.28782	3.18741	7.78478	6.60835	9.98047	1.57607	4.45898	2.85827	11.4091	3.34904	5.61091	9.10782	20.9553	2.86844	1.18678	1.08062	2.09893	9.38661	22.2659	1.99282	4.032	4.46446	8.833	9.61212	7.17577	1.09987	1.6117	7.00662	1.47251	10.1815	5.01496	1.55326	4.05513
	30.8637	4.02004	2.14897	6.31938	4.64177	2.60739	1.44402	4.97595	4.80729	7.65332	1.77858	1.31328	10.9655	10.5525	8.59004	1.38851	8.28062	6.30157	5.01329	9.27984	1.95299	3.82092	3.13398	1.73269	4.83938	1.18873	11.6216	23.2961	11.0475	7.12677	4.5887	1.34693	13.2946	13.855	16.9501	1.02623	5.61271	3.72058	14.9921	6.59399	3.19102	2.84544	1.03047	7.80909	40.2057	14.0384	4.33224	1.25333	2.23611
	59.3772	101.225	19.3452	1.70302	74.4437	19.2988	3.39928	2.79285	3.23058	3.19288	6.21424	7.45336	19.8144	4.12099	20.371	4.6778	2.68358	3.66049	5.46367	1.4469	12.8964	3.44855	1.92929	7.76324	7.5174	3.67777	2.23908	17.1268	11.0302	3.65795	8.89658	11.3162	9.66871	7.87712	17.8033	5.5396	4.42452	6.04018	24.6701	2.36138	1.07621	3.09386	2.98397	5.93766	14.9434	11.5063	2.77857	1.92688	2.45131
	13.619	12.101	23.5451	16.9763	54.4678	4.81047	4.15485	1.9909	3.04643	3.2926	1.18087	6.56298	21.9003	12.9149	4.48763	4.53001	1.76234	2.02278	4.95494	1.59497	30.2961	1.31979	1.37584	8.78326	6.41873	4.12763	1.80249	28.7653	21.062	5.367	11.8691	1.9433	8.46581	15.8551	7.42338	2.4131	1.31387	3.12813	22.9676	3.91517	1.08312	3.91479	1.12403	6.41549	27.9818	19.1886	5.63448	1.27119	1.40265
	11.2499	10.5403	5.53684	14.967	43.7594	6.56145	2.23243	5.48986	2.79563	9.13216	10.5095	7.3364	2.80702	19.4734	20.4764	3.01964	15.9972	7.78085	1.52417	10.0393	8.77193	8.03079	2.66322	4.85197	1.27696	10.4125	3.60671	28.0594	4.1859	2.75959	11.8855	1.84745	10.79	11.9265	7.63726	6.7138	1.36656	2.85099	13.5709	5.79061	2.35866	1.55571	5.58834	2.85468	40.9597	8.97705	2.16921	1.29761	2.07909
	3.75153	14.1543	2.35324	9.59932	4.00061	17.6566	1.62824	6.91918	1.82049	9.09488	2.17768	3.81298	1.532	14.6924	6.32529	3.11559	3.25885	4.63746	26.7081	5.38353	11.4145	14.994	3.70743	5.27423	7.20841	7.22234	3.89829	33.2635	9.95577	6.04717	4.0395	1.69191	4.03089	9.75631	3.58332	3.15182	1.61889	2.06775	2.04097	1.87314	1.47973	1.88651	2.89577	10.3345	11.5864	5.34475	3.1091	1.97861	2.07698
	64.3234	5.72173	10.3584	8.98653	9.10596	6.69952	6.95902	4.52627	7.87009	3.40141	1.01513	5.36971	4.09186	8.33267	9.91234	1.81145	6.77173	1.14608	5.10549	3.44397	5.51695	5.28363	2.89758	6.01007	1.92582	6.12057	2.85482	6.78071	8.65941	2.25525	7.1534	2.71194	1.82043	3.04759	21.6791	2.5515	3.51864	4.0877	3.92519	2.4416	3.10326	1.27928	3.9905	7.03039	7.98202	10.5919	1.51567	1.14467	2.08329
	12.215	5.48387	15.3982	3.20853	9.98053	8.20013	2.28462	5.95819	1.04237	1.20271	7.74303	1.89773	5.8059	9.07961	22.128	8.15954	3.06375	3.80508	3.46133	1.28629	15.051	4.18647	1.32941	3.85601	3.20329	3.98337	2.33762	14.7652	20.3545	4.13225	9.61663	3.30017	4.06625	8.33763	21.6121	2.9037	2.54846	3.04258	1.99882	10.2846	1.98636	4.52494	2.18789	7.51331	6.33914	5.39908	1.17895	1.02224	6.33049
	4.43093	28.8325	8.15634	7.0089	34.796	30.7824	2.50233	4.461	8.92824	2.58546	1.80441	3.38664	99.3248	53.6846	4.61735	5.30533	4.38816	3.20847	4.48284	6.03065	7.21756	6.70057	3.76725	3.56114	5.11189	1.67729	2.76689	13.6537	9.98604	1.28055	3.61401	1.60012	9.07762	2.62499	11.5128	2.33377	1.2723	3.37074	1.45021	2.67882	8.57336	2.10105	2.28335	1.59475	12.4801	8.91648	7.88279	1.17779	1.14609
	51.2518	3.45409	13.2625	6.27782	4.37424	18.2556	3.88767	4.99563	1.81348	9.17641	11.5927	9.54692	8.56601	62.3173	1.14145	2.82003	4.92629	2.27425	7.44504	4.88868	61.3997	3.41781	5.43777	4.42793	7.56045	1.1832	3.09703	61.0366	26.1011	4.58931	7.83941	1.77013	2.35289	4.79163	29.0569	4.33783	1.04462	3.70251	7.41506	5.14998	1.7681	8.16413	4.38145	1.05963	4.32772	1.85708	1.87669	1.00586	8.03105
	15.6214	10.4753	7.62823	5.27284	14.9355	5.53828	2.04977	1.24956	2.10169	6.34544	4.63568	3.33864	14.3103	13.1136	19.325	3.25676	4.48423	17.4323	3.61416	2.32712	26.3494	3.83561	6.61891	16.946	3.36386	10.4839	13.3948	2.6354	8.44757	4.62083	1.69409	1.68151	8.38137	11.2644	5.49537	4.03964	5.82057	2.08783	1.03201	2.33068	5.3153	4.58976	1.5446	6.83645	1.36658	6.19675	2.9023	1.68128	2.54874
	54.761	5.36075	14.8789	25.1265	11.0415	9.19129	3.59129	2.40224	1.79594	4.1434	3.49378	1.52816	19.6611	7.15577	7.10255	3.81315	13.0383	2.60305	3.4583	5.29276	7.60645	5.39205	6.6872	4.83549	5.68123	2.37846	4.63475	9.3048	2.74584	6.5323	7.83025	1.43012	4.23673	11.7499	22.6796	2.5335	2.36042	1.86893	6.64056	10.4232	5.86773	1.57118	1.48915	7.03166	8.33605	10.8609	3.28188	1.86064	5.30427
	82.9759	2.03153	6.91634	4.17337	11.6877	3.25213	6.972	1.91422	1.37502	6.70492	3.17544	3.66325	28.538	3.3625	1.39675	3.05659	4.71705	4.7547	4.76448	4.54364	12.3978	1.03945	1.29823	14.555	9.92695	7.22334	12.9437	18.0677	33.7102	10.5065	12.3384	1.09915	1.67417	10.9662	6.40814	2.06933	1.32644	4.26725	7.56719	1.45437	2.65675	1.39136	8.16277	5.84684	8.68082	8.96897	4.12809	2.56508	2.3055
	16.7614	16.3016	13.6168	11.2952	5.55509	1.81717	3.66541	2.87937	3.43461	7.86398	7.06597	2.87764	5.39979	1.44525	18.3875	2.46766	3.13979	2.36069	8.31877	3.75839	9.87226	33.119	3.73573	2.14248	2.29762	4.02861	1.40736	12.091	8.14741	7.44691	9.30898	1.42334	12.7468	4.77304	8.43784	6.05496	5.24968	4.02263	8.15268	5.04289	5.72675	1.09402	1.13128	6.85003	28.2081	132.336	2.27262	2.948	1.07319
	26.1839	8.34894	7.65978	1.83801	24.231	2.2691	6.85646	1.67592	4.02624	4.4171	8.92813	10.1279	22.9561	9.31458	5.30345	2.78804	9.00147	2.2381	7.71835	3.53761	20.8484	15.8661	4.38137	2.79012	2.49364	8.94738	3.5988	2.36446	9.17724	27.4851	5.65307	1.27504	4.07135	4.20242	27.9073	4.15217	4.06584	1.97657	4.73591	8.52777	2.80056	2.8007	1.60382	2.98793	11.4079	8.43853	1.74235	1.10559	1.35849
	12.3277	13.184	2.31283	28.2647	4.49786	4.4352	5.2721	6.24985	6.80375	3.51901	1.90207	6.46659	11.4354	9.25976	8.71893	2.54927	3.11444	3.54261	3.10922	14.0013	10.9808	3.6046	2.72389	1.39773	2.57772	1.0691		8.0358	13.7536	1.22884	9.35283	1.29086	5.97336	1.99074	10.6647	3.91362	2.17431	3.74107	21.6373	2.4512	1.52988	4.80388	2.49725	8.41168	8.20757	11.5004	2.00616	1.13871	4.22827
	14.3357	18.2999	3.54176	13.7368	6.62524	15.4083	8.65437	2.17118	9.26556	2.42815	1.76168	6.65366	13.3741	10.8134	5.45812	7.67703	6.2	3.74787	3.1706	8.56995	5.28403	2.44598	6.2827	1.34116	1.39802	8.29244		9.98654	5.68559	2.3774	2.48025	1.66478	5.29624	5.52671	18.3498	1.34467	6.60125	3.17834	5.47881	3.17589	1.84026	10.2518	2.29973	4.28902	18.3903	1.08033	2.50726	1.11527	1.53443
	13.5068	1.03885	26.1043	8.16165	2.97151	11.2092	1.58488	7.74393	1.51123	2.02836	7.04578	7.71625	13.5625	46.8408	18.4199	2.30885	6.64383	3.35998	5.32272	3.54863	7.50739	1.23801	7.88087	6.04036	5.21826	9.64805		9.65263	6.09895	2.40941	4.77199	1.43464	3.67049	6.00366	3.67176	7.00805	3.62934	1.2572	81.098	3.74589	1.40552	1.73386	5.22479	12.0192	1.97798	1.57332	4.4215	1.47214	2.29709
	23.958	1.46593	5.83908	5.78296	13.804	12.9912	3.94259	2.81047	1.42178	1.42246	4.00463	3.68953	19.4944	2.73922	13.4534	2.23496	3.3172	2.72155	2.06498	6.6447	2.41293	4.06303	1.88523	4.85375	1.65432	7.0429		13.4692	8.47223	4.94195	1.80799	1.10458	5.4597	16.9999	12.1443	7.36475	1.49659	6.88768	35.8444	2.73218	1.29882	3.61995	1.00684	5.60878	10.5424	9.49684	1.18602	1.6649	1.12646
	42.1037	25.4368	12.5024	8.88316	4.20541	7.39161	1.80116	2.78197	13.6747	3.25077	2.46973	4.65535	11.9353	11.7533	17.9355	1.05103	6.15992	3.80886	8.18565	6.85754	26.0608	3.00122	1.72967	8.68437	7.86133	5.67272		38.6896	9.58769	6.42099	6.51713	2.84396	4.55028	10.0845	1.0764	5.17164	1.72524	2.20552	11.3943	6.88916	3.22224	1.64688	2.06503	4.06113	1.44633	2.46057	3.40208	7.68631	1.31573
	4.16926	1.78389	3.07454	8.53537	30.6455	6.00436	1.11167	4.63507	1.50363	1.06086	3.64779	3.27349	7.3533	32.8253	33.66	3.86885	6.13929	5.82471	3.80891	2.48422	2.43976	5.43849	2.03063	6.63321	9.12005	3.61041		3.19777	11.546	1.07025	3.59503	1.03766	1.74491	5.64542	6.84174	2.87726	4.28772	6.6993	4.6503	5.04827	1.11818	6.50973	2.57538	4.51308	30.7762	9.71599	4.22045	2.33808	1.45172
	7.88685	8.81659	4.79117	8.75065	21.2844	12.0209	4.4424	1.20449	11.0258	5.71863	2.66365	2.78468	8.86429	2.43459	23.0012	4.81676	7.33344	6.29843	4.57756	1.43501	1.00391	2.81904	4.80197	5.13882	8.36178	5.88835		6.54346	3.36993	4.54498	18.4281	1.08604	2.33058	18.8326	40.4279	2.33039	6.61527	4.39497	3.29755	2.58516	1.07468	4.88501	6.13523	3.10335	1.28321	2.90547	9.54958	7.77227	1.7293
	3.32202	28.6286	4.30347	6.06787	30.3074	1.87056	2.87739	1.45056	2.38172	1.5637	5.91468	6.47192	18.5744	2.27464	5.29623	1.09625	3.22584	1.44879	2.81267	13.3753	14.01	4.65378	4.4256	1.97143	1.32964	2.40359		10.9809	4.044	1.3766	1.94611	1.75159	1.9275	9.61901	4.52454	5.9762	2.09165	3.93588	3.74474	10.8097	1.02325	2.33189	10.201	9.9432	6.51393	4.02875	1.31063	5.82232	1.84987
	47.801	17.671	6.48732	8.96024	8.72541	6.12404	7.5758	5.37175	5.9128	11.6127	1.41282	1.17193	44.813	5.04684	7.78659	2.52832	3.80169	2.00549	2.65757	13.3062	14.0987	3.99081	5.96361	11.8923	7.35733	1.4124		1.66076	5.07181	11.1984	4.98211	1.6268	7.10328	30.4359	4.98658	3.29923	2.64804	6.51333	5.84959	3.17512	1.36637	4.41454	10.5639	4.93107	7.01015	7.25799	3.21692	3.50173	1.89824
	1.42386	80.0895	1.87938	35.7671	51.048	8.63357	6.07401	1.14076	10.2559	5.1888	7.56133	9.89058	15.2338	67.1206	8.16192	2.87682	1.52304	4.19581	2.62271	4.81839	6.65325	12.6987	2.20128	4.73884	4.07908	7.40228		53.9974	3.29371	3.50675	6.57081	1.26961	2.86527	8.70659	4.35624	2.62689	5.86456	5.95503	14.0563	2.3253	1.60152	1.55864	3.47542	1.73861	4.04981	6.71874	1.09764	2.0601	1.30732
	6.03112	26.114	9.42236	15.896	9.68485	3.99707	4.44033	14.7129	4.83184	1.67555	1.14941	1.02982	27.7293	18.6745	28.3397	3.40785	7.48315	1.34915	2.25973	4.22967	4.22351	2.44342	4.71029	8.31646	7.82587	3.52698		9.52155	5.7163	3.40824	2.5287	8.12993	8.04584	10.1002	2.78742	1.415	4.294	2.71282	1.76766	6.13184	9.23327	1.46454	2.46417	1.71654	1.14507	13.8908	1.23065	3.49577	1.38793
	17.0038	15.9913	2.54145	9.95278	26.8926	6.84706	2.39224	1.63137	4.06483	4.8757	1.51377	1.84896	37.1005	8.75189	11.816	1.38299	1.26841	3.42253	4.76372	2.99384	9.08829	4.18067	1.38008	3.60346	11.4516	5.50987		24.6895	10.3602	1.4815	6.29065	14.0932	5.46289	7.00546	2.94091	1.22483	1.30565	1.26483	20.4024	2.63122	3.82738	3.24064	4.59694	7.40425	8.32236	20.3739	2.1184	4.53178	1.10193
	6.15276	22.5791	1.29093	7.51157	9.58845	23.924	3.68424	1.81165	6.24778	7.18988	5.29349	3.50894	24.2823	3.13536	6.95984	3.96976	5.02943	3.59793	2.7816	13.2092	11.11	10.5903	4.26885	4.01903	7.82232	8.00494		25.8253	17.2845	6.41656	6.93215	3.45028	8.35429	24.6153	3.65501	1.9253	1.11036	6.52458	35.0567	4.18463	2.24326	7.43353	2.4919	2.93106	9.32726	88.1479	2.89567	5.9894	1.67463
	4.76096	30.4345	3.99901	13.3691	23.9617	22.8024	6.54034	1.33659	9.0972	6.48638	2.82564	2.29891	9.95307	10.1164	4.97886	2.48751	2.83211	3.21601	2.6505	2.48708	14.5817	1.45929	2.6905	5.1651	4.94119	3.5129		18.2684	11.5801	1.58247	5.34476	6.39191	8.29884	15.2551	3.33166	1.80208	2.27389	1.17245	7.93995	7.55282	3.40237	1.91955	4.23559	2.29325	11.3906	2.63933	1.47987	2.22867	7.37915
	8.23998	9.23249	3.00369	3.18402	22.0626	5.50572	4.18951	1.17755	7.66957	1.41215	2.8463	3.70135	23.8012	9.61014	3.62583	2.82664	3.95848	3.01986	3.20672	4.09307	20.6178	1.6669	1.75339	5.51921	3.01182	2.53126		3.39182	7.69705	11.163	6.20555	8.97137	1.25037	6.94253	1.55909	7.36588	1.14758	3.80734	1.38896	6.94021	1.33951	1.92415	3.58884	5.40339	5.56381	4.36904	5.76395	2.20598	2.54944
	7.66242	16.8262	22.33	8.3002	26.471	30.5645	4.94598	1.88107	10.6084	5.20669	15.2302	1.12164	15.1897	17.9684	15.8411	2.50736	9.57791	2.29719	4.29389	6.03682	8.19877	4.37138	2.23839	10.397	3.48087	6.13615		11.2431	32.8116	10.1085	14.7428	2.0387	7.58699	13.165	2.54355	2.44967	1.53865	2.37542	3.92453	3.87947	3.52008	1.12831	1.71377	6.36075	15.5081	29.3649	3.78033	1.1242	1.03043
	14.2438	15.4023	1.45313	21.5862	5.7336	18.4886	8.18921	1.12574	11.0557	6.0578	6.25979	7.28077	6.54879	7.57624	6.5476	4.32764	10.9884	2.01586	6.44274	1.41518	5.75459	2.36198	5.68909	5.85729	2.02662	1.40033		16.4114	6.85866	4.17707	9.32599	7.55979	2.88407	15.4468	18.367	1.84034	2.54798	4.32268	11.8658	1.12273	2.5173	1.90073	1.66872	2.13326	1.98604	30.2411	2.47146	11.1843	1.84426
	33.9755	9.03241	1.33632	6.19363	16.5204	48.2639	7.19153	1.84014	6.51612	3.95033	3.09702	4.029	64.5938	10.9626	4.81017	4.12692	1.71459	4.40139	2.07786	2.52542	17.7983	4.17691	2.46343	1.41466	1.8777	6.9092		8.1017	13.3221	3.71065	8.41545	1.78143	1.23635	1.71901	5.95779	4.11954	2.73119	3.0711	20.5658	5.99174	6.85439	5.17776	4.16975	1.29685	15.4356	2.03915	3.51697	4.91135	6.22465
	32.0434	3.77519	15.9667	7.39931	26.4636	5.66409	1.17814	6.50111	3.40188	5.06635	1.40625	4.16806	24.5224	4.661	3.16801	17.9188	5.69547	2.71275	2.58432	4.91027	25.7462	2.35908	1.416	3.28676	5.84838	19.4816		8.40632	14.5017	5.23156	7.0899	2.72098	10.2241	2.08369	7.71868	3.60192	2.45372	1.88459	3.57285	1.25362	1.77449	3.1524	1.75441	7.14072	3.05418	5.35172	7.75906	4.18384	4.66358
	13.9958	22.5032	18.5148	5.75881	6.2101	7.33019	1.96824	1.45367	10.2138	6.45365	8.73609	5.39791	19.276	3.7471	8.82596	2.12301	28.7267	5.41639	2.92027	5.32603	17.1479	1.0514	3.96569	1.28059	4.62765	4.75139		14.2512	6.48228	1.24115	2.90443	2.44337	5.48869	13.5132	41.0851	4.42448	3.85267	1.75927	7.70681	20.5892	1.22846	1.93753	1.08906	5.93935	29.2042	2.79094	1.8241	5.39028	2.37209
	51.2357	6.54127	2.16835	3.20853	20.1077	20.8373	2.26073	2.72136	8.11913	4.81841	4.35349	5.45963	23.8377	10.1642	2.02079	4.82779	6.08743	1.57798	4.36108	8.77397	11.3691	1.28531	3.21125	1.80529	2.18922	1.63909		13.5929	9.14092	3.68504	1.97622	1.11995	7.40536	7.94005	13.0438	1.91686	2.50254	2.64253	1.26252	1.14883	2.30748	1.3211	3.9779	1.22301	5.58153	1.88057	4.39853	1.17667	5.65265
	3.10042	11.9265	23.0967	21.9251	11.1858	21.1381	1.48647	13.0038	15.8729	5.59678	2.10632	8.04619	23.3405	6.69037	1.77002	3.5038	15.9883	2.47825	3.86221	4.18913	13.3056	1.05567	1.56495	3.16828	1.85795	2.18243		16.5944	11.6785	3.88303	3.88632	1.4256	3.56503	7.506	7.57103	4.1471	1.73781	2.18905	5.31218	8.85634	1.59538	2.01991	4.53991	1.20052	38.5532	16.949	2.01411	2.59671	1.64448
	59.5846	8.83828	3.89161	4.75809	6.45734	22.7991	1.64018	3.99837	6.32261	5.8535	3.92528	3.0788	16.373	6.32308	12.4689	9.09918	10.7709	4.66449	3.05743	4.84263	6.09955	6.58106	2.81997	1.05921	3.25293	3.58428		4.52243	15.9888	3.88993	10.4814	4.85825	4.2071	6.85315	7.2804	2.53687	5.84039	3.58322	9.61014	12.479	1.91778	4.69557	1.14955	1.08	33.0486	36.7466	1.94606	1.47735	3.63174
	6.50259	8.26044	11.9134	6.19114	15.9023	5.45963	4.02139	1.463	7.68535	1.23362	2.71436	3.89184	44.7324	6.42284	3.60355	11.778	2.55509	2.39244	2.32566	9.9047	1.08824	2.75894	3.7298	1.88324	8.4104	4.35381		13.4457	20.0608	6.59928	8.95942	3.1365	8.23575	2.46196	10.3417	4.9044	6.99135	1.56326	3.49579	13.804	2.21051	8.46817	3.54568	5.86891	42.9474	26.5079	3.15506	3.91963	3.07657
	43.7845	10.7953	1.94193	15.2967	7.51872	7.32397	1.80012	2.71048	2.72255	3.75119	5.66208	1.43291	8.72145	11.5393	10.4826	1.97964	6.61023	2.19095	8.17883	4.01309	80.7857	1.42326	1.19655	1.30776	1.80932	1.49835		59.6431	12.334	4.28739	11.0148	5.73178	1.52345	3.56601	9.6089	16.297	6.65394	2.03883	36.8	4.69321	1.23895	5.15643	4.95891	3.56378	8.00981	28.525	1.90232	14.0002	2.63987
	50.2541	10.3388	1.92533	37.1863	8.2157	8.60408	1.52633	5.36708	2.86812	1.39124	4.52675	4.0892	8.21732	5.7637	37.1508	8.82622	3.34136	1.78576	1.65805	17.9785	8.45056	4.21686	1.86541	6.51651	1.84528	1.82054		21.524	14.9207	9.35592	7.00743	1.89582	3.46688	15.5211	18.487	1.55847	7.14507	5.51521	13.0177	17.163	3.47786	1.72383	3.26341	1.8604	5.47641	26.4723	1.86299	2.8319	6.85833
	12.5964	21.4521	14.5767	8.26184	2.55683	35.5376	2.45806	6.93887	6.52957	7.69546	4.85307	7.05294	5.10922	8.5664	10.1646	5.32849	5.97838	1.59999	8.06062	4.44537	78.4117	1.398	2.3948	1.41644	1.15742	6.03964		16.1236	8.27787	2.7724	5.50186	2.22408	3.74314	2.83379	11.3862	2.22743	7.48152	1.80627	13.7599	1.3657	5.05891	1.8129	2.31642	1.78104	22.0241	3.72884	5.10775	3.25984	1.04726
	5.50636	19.1411	3.48419	8.61921	3.28194	17.5632	2.87168	1.52361	11.1667	5.92898	3.69849	4.63173	3.39238	31.7927	6.26219	6.34698	10.0901	5.07847	1.2309	10.7598	31.0691	3.15846	5.58419	3.71303	11.4987	1.89895		6.06456	5.31773	3.90569	5.84683	1.46313	2.60111	9.52104	3.40685	2.16048	9.71287	1.33231	5.29703	6.78514	1.99711	4.8089	1.40252	5.66988	18.1426	5.54444	3.80728	5.63216	7.62519
	25.0471	2.34738	8.28421	4.92542	10.4819	11.4582	9.11901	1.44901	1.45394	1.15482	1.11889	5.9252	5.98444	8.60803	12.4248	4.88458	4.98051	3.78339	1.27991	7.79438	22.7828	1.06369	2.53714	5.22301	1.319	6.78957		16.9576	23.3895	1.16875	1.90094	1.89266	4.1507	11.2551	5.72833	1.6935	4.85233	1.30379	27.1411	2.06467	9.33996	1.53647	4.41359	3.92067	29.0133	5.87225	3.1206	2.34813	2.48986
	7.95002	28.0007	6.43805	3.09735	7.20829	6.08382	1.42143	1.78057	13.6531	2.15475	1.93259	6.50964	10.9984	1.08291	12.4794	10.0603	5.23926	4.23573	4.72937	3.16393	2.14964	8.88106	3.69709	4.39007	8.22046	2.55539		6.09532	5.06688	4.95574	2.73489	1.29629	1.58846	15.9831	6.1592	1.27266	3.16189	3.99733	7.98671	7.72209	2.39909	7.19098	9.0625	3.36773	6.36209	31.9356	9.49523	3.74919	4.23809
	34.9349	1.6814	9.76502	5.50304	3.55225	14.9807	6.58772	1.02472	2.2876	4.32133	1.80112	3.70934	23.3265	16.1286	5.02794	3.23856	4.7589	1.68926	3.21278	12.4334	6.3195	3.55133	9.23264	2.52866	9.74764	1.36113		18.3833	14.4125	8.71909	11.4364	8.91892	1.10571	8.40984	3.94057	1.42175	1.63533	6.83265	5.6586	1.62403	4.34451	1.38383	3.31948	11.6372	3.70343	17.7001	7.03172	4.16374	1.38302
	11.2225	50.2251	4.64503	2.94033	49.0751	9.32251	6.36547	1.3226	8.27581	1.73738	2.71858	1.37995	4.05195	22.5745	13.5027	4.7164	2.58279	2.0671	1.78283	9.46999	25.3305	3.19551	2.90876	1.63559	4.1743	2.13971		15.3489	2.62344	2.36952	2.04757	1.38174	10.6855	4.36688	5.6212	2.33658	5.94915	4.56688	3.87448	4.82871	2.75066	4.81434	5.32907	4.05774	14.1842	6.38984	6.7034	3.27398	2.25153
	4.4743	13.0136	34.3846	1.71119	6.68106	20.0262	14.0702	18.3118	3.91517	3.39989	6.19452	1.70151	25.4908	10.7895	10.4889	2.2537	5.86404	4.0509	1.47415	1.31493	9.70037	2.05311	4.12176	6.8724	6.03073	4.93938		11.112	8.23461	11.8402	3.02619	3.24094	3.2177	8.10738	30.87	2.6961	2.30048	7.7155	43.9233	11.8004	4.44737	2.1299	2.08015	9.22561	1.08908	11.8102	3.83026	2.51038	4.01167
	32.43	11.0611	30.5567	11.8551	52.4576	10.6906	5.47878	1.64587	6.52255	4.64079	2.24201	6.90664	2.40862	2.77055	6.93386	5.76412	2.1095	2.852	4.40478	13.9246	8.82117	7.95976	4.27867	2.74958	3.20987	3.96829		3.50825	4.84428	2.73004	2.38599	1.36456	3.3834	3.49165	23.3917	1.31654	7.85808	3.39765	7.99791	1.59217	3.10044	1.69413	7.89468	5.80611	46.6117	11.3495	1.60316	2.35892	3.10041
	19.3244	40.9745	10.726	1.71794	19.2166	11.4487	1.2981	2.76073	14.7849	1.78588	1.05598	4.33913	2.64948	11.9718	5.14734	2.08607	18.8865	3.95251	2.44362	5.56553	11.0758	5.72771	1.38025	6.10583	4.8804	2.82279		4.39281	9.18688	2.65518	1.79031	1.7525	2.94079	10.2125	14.6111	3.1085	1.67303	4.71831	18.8613	2.57672	3.67846	2.54518	11.4533	5.48359	2.42868	11.5187	1.89127	5.15211	9.02013
	40.8185	18.4996	10.9663	5.6835	8.98649	10.6853	1.80389	1.90853	6.56347	6.47941	2.43499	2.25662	10.9326	12.325	16.7905	3.87877	4.6251	3.43573	4.58337	11.3285	3.12525	4.51838	3.19177	2.99056	5.29728	2.70618		1.58094	7.52467	2.32125	1.55924	3.72473	12.8663	12.3513	6.89901	4.40591	1.16063	2.06855	21.31	17.5066	5.61544	5.60976	17.7082	2.0887	5.76559	7.81633	1.37117	1.0401	2.8768
	14.1165	41.2322	4.61735	8.57694	6.72119	9.38393	1.45025	1.38114	6.09929	1.81285	4.32954	5.60174	41.6391	20.1721	8.62365	6.13413	2.70362	1.97971	5.83019	3.59292	17.155	7.58858	1.41617	3.24667	1.90961	6.03562		1.09766	13.7548	1.21997	4.5455	1.25785	8.35046	35.6837	11.0963	11.1934	3.77967	6.11971	9.3467	2.41013	11.0341	5.77285	4.79225	1.23447	25.7988	2.21132	4.6588	2.20709	13.9606
	36.8519	7.97362	3.38454	11.9094	1.16563	8.69959	2.05055	6.53893	3.1616	5.42553	1.07898	2.67076	6.68533	2.03391	6.63071	2.25425	3.41033	2.17083	3.41688	5.77638	78.1729	4.04698	1.75221	3.35313	5.75062	2.49809		32.5965	14.5905	5.59306	2.81475	6.1152	12.7035	9.59613	6.31737	1.57478	5.96897	2.31557	4.46129	10.1495	14.8052	8.74376	1.42552	1.3605	3.48997	8.90877	1.74633	2.28636	1.81132
	5.22395	11.8782	17.07	4.78687	26.453	3.42475	1.42169	5.14794	2.72314	1.36941	1.20153	4.89919	10.983	2.97996	2.62399	6.55267	6.26778	4.07007	5.1603	1.43325	25.6666	4.2971	5.00803	5.66576	2.66029	7.7873		43.9326	3.44457	9.13084	6.85229	1.69281	3.84193	8.60505	4.53039	1.29572	3.06135	5.88273	5.46365	4.89742	3.80333	1.15256	5.83154	4.74733	4.28785	6.05909	4.63759	1.91274	3.55604
	7.32296	11.6488	3.20851	9.92791	3.08175	11.9335	2.95736	3.71966	1.57027	3.53871	1.0217	1.93277	3.06819	9.36817	11.4077	4.93035	3.45984	2.30505	4.51845	8.16167	2.01933	6.9927	4.90093	5.30274	1.37016	9.27258		75.1143	4.65576	1.08552	1.58215	1.25152	3.40347	14.0438	7.07276	6.52307	1.17852	2.01152	5.22393	3.10718	7.19087	3.27536	2.99311	2.99726	10.3575	4.88296	1.35615	9.3393	2.25994
	4.05422	17.1204	8.95293	4.58225	9.98053	26.2715	9.88924	3.35494	14.7604	7.85246	2.80873	16.2855	2.41282	9.85542	15.3767	8.20531	1.68335	2.51692	1.90559	5.56707	8.58059	4.61211	2.37277	3.45647	5.14279	1.28975		18.0948	1.18227	2.58869	3.33974	1.38038	2.12474	20.5552	3.46879	1.10218	4.54827	4.40742	1.86117	1.68237	5.30839	2.07595	6.10751	5.3618	26.7239	7.98519	2.10647	1.09406	3.18522
	17.4795	3.20435	8.6064	15.1951	5.2322	5.61124	6.56877	5.795	5.33227	6.17358	2.77446	1.93963	12.7293	6.1347	5.99451	5.30478	3.24824	1.2429	4.2022	14.577	7.73117	3.4202	6.30168	1.03026	3.95802	1.2787		23.8994	6.309	2.29219	13.1475	1.02817	19.8546	3.4659	5.54874	2.61902	7.19003	1.88098	11.2909	1.07091	4.53207	1.62764	4.78217	1.76449	3.66437	8.83315	3.91245	1.55884	1.62416
	60.8123	4.42684	18.4661	4.26609	8.04596	34.4767	2.87609	4.55995	5.08615	5.43432	5.67475	6.63956	74.7541	57.4205	18.3438	7.08535	8.77101	1.21901	7.58346	1.62229	15.6327	4.45231	3.75013	1.20353	14.2117	1.63758		43.6777	1.42728	2.51924	3.40781	1.15974	3.28143	12.4743	14.7466	6.60408	2.2183	4.62031	4.86039	8.13395	2.52728	2.74382	10.8664	1.70254	7.32954	12.9412	4.35478	1.34971	2.84105
	9.14851	6.29257	2.52263	9.06574	4.5426	5.20206	14.0044	5.43598	4.24665	1.57067	1.16209	1.0302	1.66713	60.0814	3.55406	2.70533	1.60909	1.06435	5.89612	9.05555	8.31818	1.06181	2.54714	4.85509	6.00135	1.88035		23.1401	6.84275	3.36983	5.41742	9.10339	1.77646	8.09665	16.7346	2.70791	10.1354	4.68457	1.84734	1.06093	2.35712	6.63644	12.5033	5.28626	2.07586	4.95086	3.96946	2.92567	1.30311
	31.3531	8.69347	7.96813	8.74922	25.8118	11.544	7.72523	1.56091	1.06634	3.98458	1.08039	1.37919	1.44587	12.6466	20.2328	19.9734	4.30859	1.40133	3.27265	3.55524	4.51835	2.05516	1.70103	5.40251	1.08802	5.54455		2.14405	1.70772	1.20668	10.2863	1.26599	2.59411	4.65005	1.10757	1.38912	8.5416	25.7103	3.52345	7.9048	1.16449	4.04526	2.37282	7.52477	4.36558	6.65377	12.854	1.45949	5.29095
	5.02499	23.0034	41.9597	26.983	35.9174	9.6406	2.28488	9.20071	10.6926	5.24639	11.3913	7.04037	15.607	57.6469	6.13103	3.71004	3.51996	4.85341	3.1178	1.82103	1.46297	3.65701	2.73914	1.43648	12.2266	2.36489		41.4736	4.46746	7.38288	2.52542	1.0146	5.85578	4.16094	1.76517	4.218	1.65805	2.67707	2.61789	6.09922	1.6289	2.12697	4.3531	1.2786	6.59368	27.7435	1.94562	6.04671	2.48285
	13.4988	16.3841	1.7576	10.9766	14.0665	2.88652	5.34311	3.86575	5.65381	5.99839	20.0175	1.44434	20.3094	49.3097	12.3293	2.73676	2.41069	1.4227	1.61258	1.87523	25.4124	13.0131	2.88996	7.23453	2.26114	5.11932		7.45512	7.92839	6.1373	7.62405	3.982	11.954	9.05625	8.35564	1.34017	5.09789	9.95758	12.0772	19.582	4.51236	1.23328	2.53002	3.69491	2.93173	1.89416	9.83504	5.78324	2.54594
	8.01556	14.5397	21.8058	17.3208	9.69593	3.33366	7.01367	4.9718	5.30187	5.15758	4.677	5.10416	12.6369	11.0612	19.4813	5.42334	3.12034	1.42742	1.27359	11.8275	14.9272	3.20815	11.3541	1.55675	2.53568	1.74565		7.58033	4.34999	3.30875	7.2889	6.98602	9.95517	5.83562	9.25127	2.52393	6.86712	7.24435	3.81521	1.89579	1.31366	2.26331	6.53784	1.40039	4.20931	7.11372	3.01278	4.73384	1.59261
	14.1495	9.05095	2.66545	6.98475	5.95363	2.58376	1.0256	2.90527	6.05603	1.39851	5.89074	2.41892	14.0015	22.8198	2.75061	6.41205	1.24424	1.10773	4.93221	9.83288	1.16195	3.26773	5.6957	1.75941	1.55251	3.38121		7.08753	6.87906	1.28006	4.4172	13.7713	2.65178	8.24037	14.022	2.42154	2.07618	10.2158	15.6395	3.91517	10.3704	4.41872	3.48487	6.40318	13.0762	7.73593	4.58146	5.5395	1.93539
	4.58934	10.4948	4.92348	4.56733	4.59288	10.4993	2.36069	4.0077	11.1188	1.41427	2.84911	3.56304	41.3387	8.50951	9.76593	1.64272	13.8299	1.28785	1.96672	2.77549	38.8563	7.70604	3.28378	1.51755	1.76373	3.44053		14.5514	7.44912	2.53599	1.6666	6.30871	13.6467	4.15594	33.1787	4.9691	2.61614	7.30461	4.74053	2.07427	5.0625	3.45602	13.2581	1.17124	11.3242	7.83835	1.00087	1.95032	1.21549
	8.57944	9.94429	12.5279	35.5006	4.41252	4.58798	2.63319	4.2574	7.64911	2.07594	6.241	4.53496	11.3219	5.91581	26.2207	3.13875	5.49035	5.89953	1.28193	7.55709	65.4726	3.42703	1.97708	13.094	1.60468	1.78485		136.145	1.83482	1.43767	4.14947	1.67156	25.1435	5.72622	10.7118	4.35584	4.95481	4.63316	9.87554	3.23961	5.09141	4.40492	11.097	4.97987	43.7332	3.58862	2.24478	1.05833	2.33144
	7.44602	5.49332	4.1529	9.04586	8.48094	5.743	8.74096	10.2052	6.4752	2.4139	3.15008	4.48314	7.23987	4.02824	3.25256	1.49328	1.21713	1.29948	4.26888	2.33483	66.7987	1.81391	5.60063	2.87831	1.74195	2.49306		95.4681	4.36882	1.48002	2.57517	6.78256	20.2994	23.4183	10.2848	12.6135	2.07812	5.03884	2.22932	1.95413	4.60729	1.16218	1.78213	7.41952	1.34765	3.17785	3.55143	4.97275	7.72683
	1.93823	40.9741	15.841	55.0783	6.68474	26.8894	1.96357	5.53701	5.82569	1.99259	34.5152	1.58112	21.7084	10.8802	6.15701	2.32098	13.9608	2.67189	6.13558	4.19442	30.69	11.3072	8.90864	2.07076	3.00574	4.10852		22.8296	1.86194	4.8927	1.37268	1.24248	8.08758	1.448	3.68306	9.25348	3.84396	2.35534	6.68337	1.87775	1.34744	5.62439	4.6716	3.052	21.0727	1.04142	1.46087	4.57457	4.04251
	17.2546	12.9069	6.93626	19.4008	5.34014	6.65388	5.29871	8.27857	4.59274	1.18725	5.42825	1.51978	13.2621	89.9898	1.79167	7.06164	21.2824	1.00526	2.25392	4.59916	14.7895	4.39579	8.10066	2.8409	1.04446	6.94237		30.399	10.7249	4.8597	7.07878	11.6874	3.52455	25.65	14.0598	2.97403	1.43907	3.15585	13.6256	5.59178	5.3304	7.21398	9.01934	2.06876	5.57992	2.73331	4.6124	2.47279	3.04994
	10.8072	25.9625	7.41511	4.63625	35.8103	25.687	2.24619	4.41489	1.24231	2.4521	56.0221	6.70509	65.0622	37.3803	15.825	2.73345	64.7249	2.4814	2.05311	4.53835	73.3877	26.8656	6.88886	1.08638	1.72372	1.30936		9.01556	8.76275	2.99354	1.01789	11.5115	12.3498	6.07159	4.52493	5.01186	1.29889	6.44947	4.17809	3.95893	2.44003	3.07796	5.71908	1.41227	4.43204	1.2892	1.79715	3.09238	1.41036
	1.99623	13.2721	10.5694	14.2157	4.97389	19.4837	1.10155	5.48675	9.69409	8.57324	2.79136	7.92008	11.9276	11.7995	43.3996	2.72297	7.33167	4.71887	1.13542	10.4648	4.40808	6.13577	6.45877	2.01642	1.12855	7.36358		18.4595	54.8644	1.58148	4.83876	2.55278	7.72942	15.8972	26.268	5.2521	3.83284	5.21597	1.45812	1.02101	4.98343	6.65192	7.85499	5.68135	14.3896	24.3593	2.34288	1.66974	3.13686
	8.29844	8.22406	8.67227	8.75633	7.9025	17.3523	1.32289	3.68702	8.06301	4.08369	10.5076	8.62987	8.35035	16.005	2.64441	4.29621	1.10161	2.6898	7.25433	7.4348	4.39393	8.72791	1.95793	2.03958	1.23644	14.1175		1.96245	9.21579	5.05966	11.6177	1.91707	1.12196	6.64935	14.8526	3.50628	1.59472	4.50382	1.10445	1.01986	3.60452	5.4592	12.2226	7.54174	34.4893	4.70235	10.5058	3.07006	1.81973
	7.34088	4.3261	11.6245	7.17551	2.50101	5.99678	6.61849	1.82564	3.95551	6.95922	10.926	1.76133	23.3195	2.31752	11.4081	1.22859	6.17289	4.09553	5.05244	6.42988	64.8056	2.6162	7.66837	3.04134	11.1517	10.2221		12.2617	18.3933	4.21105	1.37923	6.24903	1.23221	12.5458	9.35412	1.18039	2.49239	2.71643	4.40728	7.40197	1.46617	7.56192	1.2491	3.46491	24.9413	8.98879	1.8599	3.38302	3.5301
	2.20698	4.66014	7.9947	13.2309	4.74925	32.0281	9.96233	5.60021	14.7937	8.75237	12.2219	4.68507	25.9228	5.17257	51.0705	8.04539	7.12832	3.48383	3.97739	2.53203	58.6952	4.2377	8.11845	1.04941	3.07615	3.93612		4.28444	13.566	1.90704	3.24286	1.57616	1.24655	10.0245	8.86832	1.59842	3.80868	2.82769	1.79136	1.04366	2.5214	5.82513	1.39716	4.70489	22.8731	14.8027	3.19881	1.73226	2.47233
	20.8388	2.42504	63.3786	4.15063	3.56055	21.4769	2.81741	5.7722	9.17904	3.06679	7.45944	8.04695	39.4839	2.36987	5.53752	5.05332	33.7673	1.41736	5.54425	3.03769	18.1648	9.37807	3.79402	5.46131	3.93117	11.7591		18.9289	14.1267	2.76304	2.78529	2.81141	8.22237	3.86562	5.91026	6.18156	7.36937	2.55537	2.48881	7.76393	3.98219	1.98102	2.32745	10.261	16.0398	37.3174	6.38789	7.11509	1.43419
	2.6959	15.0875	20.1152	1.54707	5.73683	5.43718	1.27174	4.30869	11.338	1.33244	10.1151	1.58645	25.5307	56.1822	19.1202	3.23305	48.5261	3.07016	1.11016	5.67812	40.63	4.48423	8.12405	2.92775	4.46657	2.77252		3.12821	2.82587	6.6643	2.60136	1.48392	2.19898	11.8114	7.40195	3.83091	5.60449	6.07311	1.20193	4.08252	2.76499	3.70819	2.12772	5.50226	42.5422	22.7875	3.00349	2.96065	2.25573
	12.8567	1.82376	7.68137	2.05471	2.11354	6.34707	6.6625	3.85176	7.64794	1.1239	5.16813	1.94954	21.7497	67.2648	10.5591	11.3556	25.0924	1.06907	5.79684	5.00721	17.4442	5.16582	4.46559	1.22402	4.06641	6.61767		17.6328	13.2918	1.5145	9.35152	1.01867	3.53029	13.7464	4.86776	1.86341	4.30996	2.13202	6.34353	2.62854	6.50026	2.57821	4.58591	1.38978	8.84515	18.573	1.06096	1.32775	1.20848
	21.8906	2.46631	14.7295	4.02204	2.83267	30.4363	8.11275	9.54626	11.7934	1.89924	7.65664	1.51368	6.30723	31.5993	5.96358	1.8473	10.0618	1.56573	6.28966	38.7611	8.9394	3.034	3.13855	3.72105	4.94473	1.25608		37.7398	10.3203	3.24325	1.38119	1.08921	1.96573	12.859	3.75746	5.76409	1.15677	4.27809	17.6588	2.68304	2.50553	6.50722	5.26732	2.67602	67.5447	57.7453	1.34289	11.2007	3.19574
	64.1443	11.7303	16.4832	8.10482	20.4874	26.8232	2.96632	2.49756	3.95375	1.52854	31.46	3.40112	31.2582	17.5009	17.5975	2.76488	5.59939	1.06875	1.80329	4.44801	7.53245	3.42106	6.19153	2.73711	7.90843	1.61948		2.64931	23.2949	1.22785	1.048	5.42749	4.47635	2.94963	18.9681	2.1481	11.0485	4.57251	2.83259	2.0428	4.40925	6.26299	1.30454	3.79336	2.30745	27.6025	3.40119	2.17732	1.71318
	3.86421	15.1728	15.3428	9.94923	12.6033	2.71832	3.75369	4.70604	4.18643	2.12323	3.70319	6.33058	17.5682	7.38002	8.21265	7.81765	19.3568	1.20078	1.27081	9.75003	20.8165	3.16734	1.55428	1.19328	9.41181	1.22793		14.9337	14.4826	4.67205	1.66201	6.01437	7.33079	19.6706	5.85728	5.95369	1.32257	2.99639	2.30045	27.63	1.28321	1.07771	1.43182	4.28859	4.56495	24.4401	2.47942	3.03731	1.23792
	6.38708	2.18858	1.73766	1.89628	1.84693	6.55071	1.2154	5.9069	5.74209	2.09989	7.82943	3.77907	14.8879	6.7621	29.3079	10.5219	5.58348	1.74836	3.73894	26.048	16.8858	3.07378	8.24317	1.99771	6.91513	1.68684		4.13653	3.72972	4.39772	2.04299	4.28493	5.7758	3.24495	6.20011	2.88626	2.11244	1.15478	2.84906	26.8227	1.98048	2.35447	1.88263	4.00257	2.74525	40.2985	1.5276	8.84697	1.61434
	2.72136	2.91263	10.3695	14.9769	7.88497	6.22919	10.2295	1.89298	5.9888	8.01978	4.62535	7.91894	5.49502	6.45623	13.3802	2.76268	4.77127	7.16097	2.43731	6.15028	5.0918	2.04236	2.41717	6.0604	18.0927	2.24526		2.12208	2.69159	5.26997	12.1231	2.43704	1.62542	5.27716	4.56389	5.642	3.45822	3.96881	8.01437	13.7964	6.54632	5.59679	1.9491	6.7397	2.93012	1.98739	5.69944	11.4768	1.73982
	26.7044	16.4953	2.28625	1.73677	14.8848	35.3403	1.51776	7.1435	1.09849	4.77355	18.8	8.20773	24.638	14.3693	3.25792	7.23259	13.3307	2.81774	6.87619	9.59139	6.32657	8.37482	1.58156	1.13137	26.3542	3.16458		2.20776	9.05641	2.1006	6.17347	1.40073	2.86623	13.6434	3.60085	4.4211	2.58327	3.25385	2.66334	13.7668	5.63719	2.13617	3.99901	5.65461	14.8431	3.13894	2.01058	7.14598	3.07938
	11.1292	74.8529	7.15105	2.03695	8.20555	7.15153	7.66084	2.96951	5.78886	5.74136	31.0736	7.76273	4.53927	7.19452	3.75574	2.28569	3.55945	1.37492	3.76723	2.83895	28.5627	1.73913	2.69084	3.23598	7.42774	9.81593		2.90487	9.45386	5.4724	8.38338	1.66523	1.53907	7.10415	1.62609	8.37185	3.92034	1.42108	5.91413	7.49217	5.26182	4.23429	2.70297	3.78742	3.73807	10.7901	2.24124	1.68835	1.92277
	20.6346	3.46703	12.9038	1.17727	3.93926	10.865	6.73196	8.11693	2.29169	2.62941	8.53091	2.29929	3.32516	13.1107	17.3855	4.24603	10.9459	1.97468	1.73054	1.00537	27.9793	5.13474	12.8584	8.95653	17.7103	8.11903		11.0615	2.94535	1.21308	9.46804	6.58814	2.61928	6.42555	7.16665	2.25444	1.41587	1.00696	2.71931	11.0335	2.09869	5.19114	2.12646	6.00513	2.71464	22.891	8.08606	1.42599	1.13698
	74.934	75.0677	19.1387	42.9635	4.30043	14.0648	10.0359	6.27369	7.64384	6.5758	4.89157	7.35468	6.31213	1.22265	7.34363	5.29871	3.68145	1.03638	3.34792	17.8249	23.4824	5.60273	2.00945	3.34066	2.45261	6.66391		21.3409	14.9352	4.7218	1.92516	1.39621	2.73654	7.60468	7.32832	3.82922	1.49369	2.58308	3.53399	13.006	1.37328	5.54703	1.01724	16.9651	2.18702	5.7981	2.39678	1.2991	1.72019
	61.9764	34.3342	5.47483	11.9254	3.79903	12.8117	7.0743	5.7349	14.9545	3.94851	3.61539	3.64724	1.75465	9.80719	11.2256	1.36976	4.01388	1.68077	1.8677	4.92503	19.1829	3.1752	7.20558	2.42175	4.08769	6.94338		72.5631	8.58924	8.35364	4.43618	1.20088	2.05177	34.5933	24.8172	1.77958	1.75424	7.3267	18.7151	5.08281	3.5623	1.24624	4.20535	1.01168	3.70988	15.154	2.13828	1.76165	1.6578
	8.86846	35.3066	2.15506	12.4725	11.2596	6.04404	8.83391	2.90372	4.25892	1.13481	11.4636	4.88128	59.3943	11.4573	4.19253	1.64106	6.19411	3.57813	2.49237	4.26294	5.87518	4.04766	2.94249	1.06367	4.92802	5.65864		10.2553	5.43362	5.84671	4.14292	1.77827	4.11309	7.85138	5.67769	13.4732	2.84769	3.83385	10.1554	78.5678	1.28526	1.80747	3.16134	7.53919	9.85609	4.8345	2.22578	1.95702	1.16362
	14.256	14.2889	10.1392	9.59861	5.6169	4.62117	9.80668	7.01554	1.43874	1.808	4.05299	1.77124	9.72761	19.9582	5.31707	4.9866	8.78162	1.98097	2.96877	4.5833	14.5902	1.58273	5.23578	1.29083	6.87208	3.84665		29.3181	11.364	1.90852	1.68427	1.51015	2.56511	3.3708	16.1838	4.43629	1.75473	7.10458	9.47381	15.4285	2.98479	9.54085	4.83415	1.34353	11.9497	2.2627	1.07069	1.16104	4.54091
	23.272	4.08755	2.79333	30.1749	7.444	26.282	3.99633	5.90742	2.25544	10.7331	2.26924	22.6573	2.38412	2.07472	8.05634	4.49142	12.2692	6.3987	2.16602	5.06009	6.21129	5.8964	3.3375	1.31577	1.9005	3.5506		18.324	8.16758	1.0732	8.11827	1.32251	5.16941	25.8388	20.9249	3.07474	5.1646	5.06133	12.2781	47.2284	1.01941	2.45192	3.51449	13.4442	17.1264	5.84912	1.10162	1.22988	2.302
	1.39698	10.2804	5.53794	34.5962	30.604	3.44234	1.66017	7.56521	1.97132	2.66245	8.15247	8.17687	48.0506	17.8983	1.05442	2.88344	7.64111	3.69789	2.43579	1.72408	16.4736	4.05654	16.1632	2.19058	1.72625	8.14819		8.13612	11.2241	2.36164	18.2835	1.80947	3.32062	9.00835	35.2321	2.45304	2.02349	2.39189	13.2258	25.3837	3.44997	4.57471	4.14172	5.9576	32.9741	11.1311	3.08745	1.63401	4.64325
	3.20603	17.6643	12.6364	4.79326	11.8002	21.2776	8.59504	4.96766	7.2843	1.08238	2.50542	7.70863	3.74667	5.76246	13.3251	2.41252	6.83775	1.92219	1.00079	3.86415	8.07258	2.01179	6.47402	1.04006	3.67233	2.62726		75.4519	1.79312	3.3649	6.4412	1.32658	5.9501	6.0294	17.4441	5.25322	4.6493	3.56233	12.6515	5.13194	2.57462	10.3275	1.58083	6.95315	6.59449	8.53104	6.14928	2.94502	2.07348
	12.2885	27.5089	10.9868	6.92329	9.76373	8.364	1.50426	8.95515	4.76169	3.83545	13.638	4.17378	14.1969	3.5715	4.66932	2.9066	6.7122	2.66749	3.57172	14.1015	32.9074	2.34575	1.86015	4.71523	12.2377	3.67526		15.5546	14.3643	4.29429	3.36723	8.54545	5.17769	13.3981	10.9335	7.54142	1.05042	7.79142	8.18231	9.78946	2.39141	4.6688	4.36318	5.61641	66.1157	3.57724	1.69728	10.1948	2.2305
	28.9826	68.5726	45.8015	1.20036	13.4405	43.7597	13.7947	6.25141	2.21569	2.34419	11.2556	3.11347	17.1152	2.28948	11.5133	2.61379	8.5264	2.91645	1.78738	5.64617	23.907	5.82281	5.31848	4.40477	13.7669	6.05271		49.2927	8.11782	2.04593	6.77701	1.88497	4.33137	8.75308	3.76331	10.1458	2.91149	3.56554	8.5834	4.00691	3.40033	2.42766	8.58176	4.9786	3.60516	16.1686	1.37647	1.20644	2.96302
	55.0867	12.3207	3.33085	2.2913	15.5647	22.2648	1.04222	4.89151	4.14492	4.36558	1.37807	1.78914	5.59935	5.53904	13.8434	5.55347	2.42247	3.46214	1.76035	5.89867	45.8872	3.64967	1.28111	3.22396	6.6487	10.5558		12.4535	3.77612	5.09463	3.61532	5.75846	4.29249	14.234	2.96039	3.63005	2.71669	4.66208	11.7558	11.5908	3.05285	10.5031	1.32093	2.73373	7.35008	5.11385	1.1869	2.48284	2.10713
	6.70721	6.18274	10.8284	4.78154	3.10897	27.7525	8.75576	3.59584	7.75668	11.5203	4.96106	5.08283	3.91541	59.4495	13.4301	1.15856	4.44179	4.01443	1.30391	2.47122	1.36007	2.28292	2.4192	1.67345	7.59591	6.97002		11.8824	8.18103	3.56437	1.38381	1.78053	1.29785	9.25003	8.91896	4.67316	6.04197	4.12827	6.04651	19.3935	6.54811	5.68503	4.04248	5.98434	68.6696	16.2644	2.53951	1.92093	6.6242
	10.2183	23.2633	29.4556	2.31404	13.6158	36.3457	3.11977	9.1717	4.76461	1.80467	5.563	1.76285	5.61195	6.21879	2.9426	5.02851	6.63676	3.0821	2.51107	2.93787	60.9878	4.94796	1.7373	3.3126	3.71843	6.60712		8.77099	8.96854	4.14407	5.09012	3.85088	1.77869	17.1837	9.88979	3.46802	6.02166	3.30165	28.6546	94.8465	3.74269	2.03706	8.22956	1.04987	8.78151	1.30388	6.72461	3.90176	1.20077
	9.64262	9.69454	1.95965	28.6768	1.97101	37.3698	1.16139	4.3004	8.09809	6.99226	6.16494	7.53985	18.795	23.2588	13.5961	2.28017	6.8961	5.03824	1.24379	4.67121	9.54823	3.39015	6.60298	2.18479	9.86769	1.59837		7.72312	8.29222	2.51038	1.35566	4.30528	5.48901	29.5664	24.5846	7.88293	1.18915	1.60263	6.13015	51.7915	1.23895	2.97927	24.2234	6.95782	64.7197	2.83757	1.70303	2.02698	2.72959
	3.9637	2.20467	10.0241	10.8743	3.08222	3.20884	1.36288	8.33711	10.2501	2.58061	5.31885	2.09432	11.1056	6.7757	16.5824	2.80679	2.13661	6.7844	2.02027	3.83506	9.89231	5.66659	1.28806	1.40397	3.00321	1.61748		40.5078	13.4997	5.70979	6.85163	2.24171	6.25854	8.26683	6.89472	1.96018	3.03959	1.14433	37.508	42.7152	1.3239	6.85098	5.05468	1.85912	10.7462	5.40091	1.77506	1.01926	3.07167
	8.54832	17.679	7.35255	15.1549	36.1452	4.14444	9.47796	6.96478	9.59938	6.36878	24.9063	4.16234	16.5908	11.5987	1.89148	1.66698	4.10642	3.27165	2.93038	2.65894	12.805	1.01298	4.99007	4.69251	8.49601	9.55958		10.2406	11.0822	5.41871	2.70085	1.82348	1.649	8.15957	7.43273	2.97853	5.23034	4.36927	10.5644	8.99875	1.71334	2.31726	7.92587	6.18888	5.51226	7.84533	1.45645	2.89925	2.32232
	7.96464	19.4454	13.2232	12.7915	28.1334	2.18775	1.2202	6.53271	2.3636	2.96343	33.5386	3.23539	15.0077	16.4184	2.51985	2.40038	1.59082	3.79502	1.70301	5.89911	9.74872	3.13115	4.04093	6.11697	5.11999	2.79364		18.6177	8.90173	4.84246	1.29544	9.43526	13.3959	1.13266	26.6198	6.37678	1.8282	2.17258	17.203	15.9666	2.54008	1.97558	8.7459	2.68239	4.24999	13.4599	3.41003	1.28235	1.24353
	1.96935	48.3146	42.3074	1.58686	4.38577	16.5308	8.18727	3.86938	9.89344	2.65578	23.3634	2.25357	5.98024	8.87267	24.3239	14.0632	8.12973	5.23282	8.77774	1.23803	9.2475	5.30633	2.70033	1.07124	5.21066	4.72576		6.35014	11.0385	5.37389	3.13288	2.54058	13.285	10.2876	4.17353	2.78949	9.1908	5.42282	14.3276	4.78418	2.59483	3.3201	4.55189	3.00999	1.71337	16.3973	6.13116	1.07806	3.89251
	2.98821	1.27251	23.3159	3.97443	4.79261	9.21311	1.30783	2.41104	11.4035	3.05739	23.9724	3.03004	33.3272	10.1052	19.8354	3.48009	6.46052	1.67826	2.75205	3.8767	56.4945	1.94521	3.66761	6.91917	5.6868	6.20651		22.5616	7.51906	9.01362	5.06852	1.3736	6.50008	9.07486	3.04025	2.65052	6.86809	2.84336	15.326	23.6979	1.98278	1.68075	1.16625	3.59306	64.1055	16.0405	3.6155	2.45158	7.43102
	34.769	9.12475	32.8634	4.24761	9.33843	1.5292	5.01064	5.49245	5.51877	6.53791	5.47004	3.24796	10.2429	2.45932	4.93102	2.23826	6.35914	4.13105	15.3306	15.9437	14.4021	1.27421	4.27207	1.77857	5.98413	1.95926		15.3525	11.7751	7.3883	1.47676	1.92612	2.05973	10.0137	8.75573	1.65749	8.04371	3.01486	27.8577	9.25361	2.10841	6.56953	1.32628	7.32659	17.2452	15.0648	1.17851	6.86948	6.29124
	55.24	1.63103	18.6	7.07959	3.06238	10.6455	5.63482	2.381	6.13846	1.08238	6.3105	1.98002	16.4283	2.38347	5.59464	3.54957	1.48767	6.56813	15.7876	3.4334	36.3706	4.88359	6.15272	1.94382	2.76463	9.06851		5.35427	21.2236	6.64804	8.0515	1.24294	16.3918	4.62359	22.3913	4.54263	2.96902	1.38734	7.18719	1.86546	2.68106	1.32152	7.47065	1.11395	4.5718	3.65432	1.46352	1.01963	2.03773
	25.4842	6.66369	14.2639	27.5596	12.4723	2.6716	1.42104	7.37248	9.07264	3.02344	7.05658	1.2047	9.63099	5.3119	20.3477	3.84183	3.21523	1.04801	1.34331	1.15651	6.70661	2.08811	8.41298	9.3966	16.175	3.76774		5.61276	12.4577	12.6287	1.35174	9.61703	8.32912	17.0435	12.3897	1.06842	7.01649	1.17084	13.2699	3.79042	1.3633	1.21279	4.95135	8.85811	23.8293	2.7267	2.05079	3.55568	5.98772
	12.9109	9.37275	1.70777	9.58902	3.71231	31.7119	2.67474	12.5681	5.80347	8.30348	8.93142	3.18777	9.2949	4.31927	3.90897	4.53663	3.29775	17.8517	6.60869	6.6002	17.3708	4.8474	1.86372	2.56741	6.10975	2.89718		9.88622	3.417	2.51136	2.63474	1.96998	3.22885	16.3184	4.97372	1.96356	6.08499	3.34383	7.59419	2.14259	1.39657	1.32946	1.07489	1.09273	6.02297	6.19638	2.06537	1.78659	10.0457
	12.4536	8.69207	4.08537	8.55171	7.48182	13.171	4.14173	2.4126	9.30298	3.77756	17.9436	5.96406	28.6297	10.3105	9.55888	4.46053	2.94292	2.7775	1.56332	3.37545	34.9079	3.41713	4.77807	3.64844	5.14279	10.2603		8.94892	11.9589	3.61658	1.85119	1.58566	2.56925	22.1977	9.93926	1.18939	4.42791	2.56099	10.6237	17.0678	2.99477	14.5078	2.59397	1.50945	5.27583	5.70045	7.06707	1.7103	8.79862
	10.364	1.83181	12.6287	8.68813	7.50119	8.79113	13.8249	3.09799	6.2431	6.52639	1.52128	2.69895	4.51057	9.48442	8.2273	1.78333	2.53328	4.73239	4.91023	5.64286	25.2815	3.6133	2.44987	2.52598	3.51683	4.02458		16.2115	6.45493	6.50374	10.0087	2.85346	3.95919	15.4174	6.421	1.06392	3.7294	7.39699	1.93296	6.79934	1.90448	2.98596	5.13154	2.48124	45.7103	14.9814	1.26821	1.04159	11.0508
	9.67845	55.0864	21.3269	2.99006	1.55771	1.88806	3.97933	2.5618	4.02157	4.48652	7.78107	2.54922	24.3789	2.91111	4.97844	4.0442	43.367	3.98834	7.39679	2.99891	6.57011	1.03296	2.58493	4.06491	12.0969	2.68456		14.6605	2.56	6.63819	1.48593	13.3711	1.36476	7.41948	7.93918	4.91959	6.98072	3.08998	1.83878	9.46895	1.07289	1.78572	5.25819	2.11841	3.51534	8.41614	6.04587	1.89711	4.46941
	10.2706	37.8404	31.8935	21.6857	11.3228	29.4327	15.8105	1.44072	11.5555	6.61005	7.24205	5.12207	16.805	12.9257	5.30325	4.20522	3.31897	1.22404	7.0957	4.41298	96.5679	12.5522	4.89635	10.336	9.06484	8.63624		10.7452	26.9265	5.80534	2.89723	2.95519	4.144	31.9375	14.3781	2.01532	8.19646	3.62539	3.49382	3.47375	2.12453	1.76607	5.17722	2.12096	2.24824	4.75374	11.1218	3.30487	1.06828
	11.0816	4.64405	21.6918	3.98687	3.55087	8.96799	6.90514	6.54204	4.82483	1.92258	4.57276	11.2191	28.8685	2.3608	11.8288	3.10622	1.59082	4.57584	7.05629	1.71218	4.4181	1.81886	8.39247	3.37629	1.85744	8.78804		14.323	10.3519	2.02377	1.84988	1.67563	2.94908	11.2823	7.38247	2.96166	3.36637	1.63114	5.75014	13.5449	1.67394	3.61619	2.62736	1.49799	5.96376	12.0984	3.42903	1.61057	2.97844
	6.93494	8.91488	2.43794	1.99113	7.43339	26.7316	8.82807	5.35517	2.36828	1.58431	1.57481	5.60021	9.48815	17.2272	10.119	2.24764	2.75136	2.08564	3.82053	4.0783	12.6823	6.24368	2.71525	2.738	1.29722	3.46163		30.1017	7.2328	3.984	2.1726	2.13456	4.69718	24.8019	3.59384	6.19562	3.51235	2.15973	1.14792	4.04491	1.62276	6.04134	4.82848	7.91773	7.74036	1.36886	3.17936	1.79403	14.8838
	11.8845	40.7817	15.2559	21.5699	17.8978	6.76941	1.39858	1.75933	7.95018	7.76123	8.30553	4.03281	23.6171	10.0487	6.25126	5.38308	3.5789	1.67732	5.05648	6.54335	6.1022	5.83357	4.40272	5.37445	5.04604	4.76496		16.0518	5.87904	8.35758	4.95396	12.2408	3.55706	3.82844	4.49883	3.82303	4.5299	3.22734	4.07535	2.46502	1.76094	1.67866	7.02456	1.27648	1.30215	4.57387	13.5266	1.17481	3.15929
	15.4031	14.6663	16.91	3.16022	1.64951	5.4985	1.90099	5.94265	5.97184	1.32577	5.33951	1.37348	18.8272	9.06106	9.69395	2.9463	2.94823	5.94071	4.75867	11.1504	2.24458	6.31385	4.95312	1.873	3.95852	1.47875		9.3729	5.83959	7.04009	5.8429	1.45408	1.00629	8.54928	2.7134	1.8786	3.11452	3.05905	7.12067	1.2471	4.16923	1.46956	6.66543	5.5082	1.29006	5.89427	4.50458	6.55429	2.91255
	4.04998	1.42186	8.36061	5.49096	46.7872	3.83898	9.03994	2.09036	1.54572	2.43482	5.78462	4.22102	20.6112	10.4362	10.0134	1.09239	10.1402	1.91307	5.84812	3.6762	25.6536	12.0706	1.07742	9.0808	9.89909	3.81147		101.911	11.5037	1.59626	5.02139	1.08152	5.00786	15.6212	10.1683	4.1471	6.63171	4.3777	14.0075	10.0086	4.1091	2.57194	3.48708	1.7123	5.40794	12.4952	16.3537	9.28013	17.1304
	3.31447	2.67688	6.17732	23.8999	12.7994	5.11097	2.83792	2.95086	1.04997	4.36649	1.49733	6.17094	11.3072	44.4034	7.6344	3.66151	1.43344	3.12328	1.30492	6.23863	16.5671	3.55321	1.16639	2.02488	7.01593	3.06908		16.653	4.37936	2.30549	7.01528	1.04987	5.99439	19.8251	15.3298	1.6243	3.53217	1.17486	8.40623	1.48047	1.24048	3.26657	1.73488	2.99981	2.74404	10.782	4.73878	1.1856	1.29961
	8.94201	12.1846	9.46444	35.7031	7.79641	29.2033	1.77208	2.44316	10.0191	6.91436	2.15656	8.1342	40.1897	20.0097	6.38551	3.51869	1.79063	2.8979	2.33854	2.7279	13.9192	2.51444	3.07196	5.1317	14.704	4.92179		13.5519	10.7303	6.83126	2.19943	1.05349	9.61135	2.25889	5.15994	5.6932	8.03694	3.06548	1.83813	2.87266	3.03724	5.49057	2.85576	1.35753	5.33907	3.72113	8.12406	7.27808	7.94133
	13.3465	44.6937	6.49396	2.15063	5.97577	8.78698	1.64498	2.79751	6.5699	5.9702	1.88798	4.42675	95.7287	2.50961	8.04355	1.51975	15.3217	2.80894	1.98061	6.88993	40.3777	1.51393	3.5361	3.31037	2.19834	5.81446		13.3308	6.60692	1.24509	4.16518	2.68843	9.41124	14.0159	8.1441	1.56522	10.9566	3.35306	1.93955	2.88187	1.35051	3.90851	7.71007	5.327	15.933	15.9851	2.68092	10.7407	1.71949
	6.72984	10.137	7.43115	2.30445	11.107	13.6094	5.76867	2.73742	6.70788	7.05167	2.85663	1.41196	14.1346	35.8654	13.8036	1.84068	1.85487	4.5661	3.00363	3.78571	51.6395	4.2563	1.58665	3.8235	4.46049	2.60012		26.2727	8.44286	3.97711	3.06808	1.41294	11.0204	4.13163	8.46744	13.3972	5.50588	1.21583	11.5589	35.1513	5.43786	1.23035	6.15476	3.25018	5.55334	2.98146	2.88684	1.72407	2.75342
	37.819	45.0326	4.17671	8.49239	6.10215	17.6627	1.98304	2.02509	9.88175	1.27515	21.9694	1.359	11.7371	10.3208	7.72163	2.24102	2.55038	5.62259	3.02687	6.77668	32.4652	5.58703	10.4597	5.56108	1.02167	8.15925		69.6165	8.78629	3.2265	1.6823	1.71135	9.39212	17.785	12.4072	1.73964	2.5475	4.86693	3.08153	8.55887	1.79241	4.00303	2.11827	3.31001	1.41089	6.97974	1.0212	5.73375	1.24563
	45.8076	26.1717	3.19688	27.9699	32.1336	21.7059	2.58659	3.19435	6.24486	6.66824	17.8708	2.1949	3.93291	9.20204	8.35453	4.84268	4.10288	1.76722	6.04843	3.77028	1.79201	2.33944	3.05264	6.10004	10.6341	3.7612		32.4493	5.5085	4.30463	7.04801	6.61481	4.60253	7.98867	11.4983	2.18692	10.7884	2.37462	23.5057	15.8273	3.06616	7.11152	5.85517	2.96798	10.0961	15.2369	2.73571	3.26059	2.34336
	71.4616	38.7911	10.0988	18.6967	9.00632	9.86128	1.14361	2.18983	2.39517	4.31829	14.9691	1.24089	22.0977	15.6109	32.1002	2.6579	2.17905	5.08162	4.12491	7.61437	7.89834	2.43471	7.41706	5.36153	2.66181	4.44428		33.6619	3.94582	4.53907	2.38534	2.239	3.25084	22.1934	9.49904	3.82641	2.79451	3.76075	4.59234	1.58411	1.62558	2.45735	1.75819	3.8655	18.2062	5.22508	9.81339	3.60183	2.57888
	12.8317	22.8005	16.4433	1.45045	9.6641	2.66159	9.42396	3.81705	4.71024	1.68434	8.27971	1.23594	14.5792	5.84779	5.91347	1.04166	2.50499	4.17632	3.82154	7.04791	8.00124	17.569	3.64524	6.32721	19.9284	1.29126		4.16728	9.8818	3.4767	3.8621	7.25233	3.674	12.1196	7.59791	4.58201	4.16494	9.80695	2.85696	16.6326	1.3523	4.20251	1.09001	5.62703	8.57529	5.89317	2.64292	4.35018	2.02862
	20.1999	33.4468	2.99096	10.1098	13.5383	4.19404	4.10395	1.01954	3.03181	1.5049	14.7954	1.30109	3.62274	83.081	13.9269	5.50881	5.50037	4.19046	1.71993	6.8668	14.5085	6.01046	1.09674	3.35803	10.9132	3.70491		28.7126	10.8648	2.16808	6.86079	1.9225	12.982	23.9839	7.94541	2.44235	4.36216	3.36471	5.70338	1.45859	1.39452	7.9588	2.84757	2.73076	14.5874	17.9948	10.0144	2.21305	1.03394
	20.4097	13.4229	11.1672	7.39327	5.19207	5.50436	1.09635	1.35628	6.92535	5.64194	41.2535	2.33168	9.77453	6.60381	11.4497	7.50113	5.02884	3.62434	6.96561	4.8358	2.59278	3.57131	7.09339	4.46089	2.01497	4.92179		15.0186	12.8731	8.41176	3.69714	2.82949	16.6487	2.80447	3.45476	2.67415	12.94	1.89865	2.42163	3.78505	2.5631	1.60046	1.65391	1.48654	19.3586	17.7316	3.71493	3.54489	4.51357
	29.5295	11.2958	26.0788	11.043	22.3901	19.0121	1.44895	2.75918	7.37258	1.20422	4.79156	1.26414	6.05236	38.5012	5.96461	1.49438	1.51773	5.37018	5.5493	3.38669	2.71514	2.59725	9.57275	4.16157	6.03782	16.8447		16.9884	4.27646	2.2321	2.0947	1.19229	5.20287	1.80124	4.54636	1.20233	4.76338	3.21007	3.1823	1.14039	6.60005	5.73647	4.4117	1.88671	3.53588	3.04496	12.4656	1.94549	5.07505
	30.3286	52.9576	27.7938	7.53715	37.3132	17.2049	1.01703	3.82275	6.07298	6.64975	26.1477	4.30446	9.57007	5.05055	3.54066	1.12713	5.14319	8.03421	4.13779	3.43185	58.5419	1.10774	12.3398	5.2582	5.32362	2.10704		4.3357	6.7143	3.12258	4.84268	1.54722	5.23282	6.05299	8.38719	3.07474	3.34268	4.65364	4.78992	8.7101	3.09661	1.39136	2.05652	1.08764	29.6311	12.754	2.50858	4.2765	2.89853
	20.4804	17.8042	10.5965	10.8061	6.1326	9.32152	1.55709	6.93369	12.3377	7.66575	3.89945	2.6159	7.13624	17.5244	3.83823	3.63394	2.23445	5.63705	5.13378	1.41364	32.5613	5.66591	3.97619	1.18036	7.56653	1.50941		4.89294	5.02608	5.68221	4.22016	2.53696	11.869	11.6076	4.48948	2.88908	2.55281	10.1548	3.00975	6.42894	5.03409	1.03045	1.10923	5.95251	14.8331	39.8272	1.62702	1.38469	4.08247
	12.6803	12.2053	5.68297	33.8019	25.1236	5.81497	2.20751	1.82305	4.70089	8.29166	7.62143	1.01382	2.77552	21.0555	10.9793	2.69595	10.294	3.08179	7.10277	9.83442	16.8115	1.90986	3.44409	4.65465	12.5705	2.57147		1.5436	4.92095	11.8225	3.48637	1.4464	7.01884	1.71972	6.86667	3.64918	2.45227	9.34223	3.23565	17.8708	4.79894	1.56073	1.64572	4.32509	61.096	72.0098	3.17804	3.51512	1.83305
	9.79538	17.4824	21.715	2.08171	9.10042	12.285	5.57238	1.50444	1.70298	2.27054	5.78039	4.80051	6.66852	31.5709	21.1157	5.94334	11.3839	2.08847	3.49417	8.97337	5.19558	8.16174	5.49387	2.17677	11.0281	2.15278		7.49613	2.42819	14.1028	4.84465	3.36347	5.23951	7.99296	6.69604	1.47351	1.2839	3.27715	4.37238	6.69379	21.9672	1.31984	2.97263	1.91641	12.9936	13.6096	1.47634	3.27957	2.21227
	15.1315	24.1902	6.59803	13.6331	12.8732	29.6876	1.21735	8.83704	3.55797	1.87923	16.5064	3.71506	9.35092	7.97651	13.5726	6.80412	1.31203	1.30797	5.6809	1.0296	5.54408	2.272	5.49912	4.39809	7.57362	6.50709		26.1372	3.31837	8.35315	1.44011	1.2357	19.2304	6.40195	18.388	5.48334	3.54716	3.31009	3.80402	40.6153	3.39956	2.49583	3.041	1.45428	18.4608	25.6137	12.6035	3.87125	2.5901
	21.4149	17.5132	2.28017	4.85152	5.10443	5.78719	1.23124	3.53005	1.16105	2.90917	5.06671	10.1702	19.3453	28.5386	7.81732	4.45612	4.39582	2.53389	3.90717	12.0344	9.97988	4.11254	3.14466	2.39547	8.37545	2.76901		6.90959	6.66498	2.66109	2.17587	11.1091	4.50216	6.75805	12.0808	3.20133	6.43351	8.18545	3.53991	10.0635	1.36612	2.16796	3.54977	4.57376	4.35672	1.41878	6.9619	1.01219	3.51608
	29.4389	36.4791	1.34241	8.69452	6.76547	23.8703	7.07715	6.58504	11.1217	12.7066	15.4208	1.2428	1.76095	3.8584	2.04574	9.26902	7.07822	1.88604	5.20122	10.06	4.98271	4.77159	8.80951	3.34199	5.34084	2.49407		43.5679	6.11263	1.64059	2.657	3.46611	1.00501	14.7667	12.2183	3.39881	5.62963	7.23632	4.07205	2.82353	3.45048	2.17005	2.08204	10.8148	33.2077	4.14402	4.28452	1.83496	1.91856
	12.0104	40.1682	4.00898	6.77444	2.66015	7.48288	4.72814	5.12878	9.48012	7.00529	5.57568	5.68784	8.10949	7.48225	6.09927	5.40459	3.7457	2.66246	8.62164	33.925	30.922	1.53237	1.30043	1.71487	13.8855	7.60585		9.64823	6.26484	3.98548	4.10823	3.538	10.4615	8.53498	3.50385	1.34861	5.0597	6.32094	1.54703	21.4847	7.18754	2.75469	3.81723	3.00151	8.10808	23.6861	2.76443	1.96112	1.61294
	10.6016	6.48985	6.26976	2.96804	8.70327	15.6373	1.28005	5.08008	8.10861	6.1654	5.70011	3.55352	25.3668	20.5942	6.61277	3.26503	28.0023	1.89547	2.99453	3.45455	7.25029	2.47671	1.71849	1.8436	10.6791	3.38725		13.4457	6.24332	9.90016	2.87301	2.42166	7.45985	20.6474	3.67215	6.56076	1.57684	1.34396	1.43441	48.347	3.14394	4.0875	2.07669	1.39572	4.42076	44.774	2.81923	2.23798	1.54144
	14.9958	9.10306	4.53099	2.32754	18.0325	9.63383	2.02653	1.34436	4.70206	4.59351	9.77657	2.22805	12.2672	7.2007	3.80792	2.68217	4.4247	2.38081	2.53936	3.35144	4.17369	2.43573	4.14006	2.31352	3.62573	5.04895		8.53081	1.99263	9.00919	1.87017	2.98684	2.89586	8.18889	5.33018	9.55899	3.54281	3.79047	2.745	11.2331	5.12723	4.81392	1.54271	1.26757	6.63074	35.337	9.11698	1.42227	1.98586
	3.61669	14.3956	5.26226	3.0128	1.36628	8.94138	9.11433	8.45574	12.4517	3.46809	13.3431	2.50084	30.9116	1.78575	7.39972	14.8479	7.64818	2.41224	2.50652	4.83315	16.0597	5.21482	4.79332	3.546	3.20379	1.61144		36.8787	9.43167	1.0205	1.77068	11.2013	7.65581	1.4194	26.2349	4.83351	3.44613	3.6515	7.65281	84.5534	1.33465	5.93805	1.10481	2.1583	3.16212	16.224	3.1449	6.61197	2.89853
	8.19425	3.86614	3.20962	7.04052	3.29163	8.54988	2.13273	3.1384	8.74058	5.26155	6.85656	2.31187	18.6675	6.02463	11.6976	12.0284	1.91735	3.64037	5.68848	2.47893	12.9763	2.70874	7.29556	6.57931	9.39358	3.3023		96.836	13.9857	6.34268	3.04517	2.38775	4.37183	4.62073	7.17522	2.90258	7.16876	3.07953	7.24843	103.31	5.76103	3.85707	4.48258	1.45895	22.0023	12.6846	2.65838	9.23175	2.53402
	13.1664	7.21704	2.26854	1.22736	22.237	21.2114	1.56981	4.74023	2.04148	4.10188	2.2899	6.55041	7.43592	3.38806	11.8313	3.43763	10.3825	1.90553	5.59098	8.87378	9.44386	2.02101	4.52558	3.56159	8.76042	8.98005		2.90706	2.50217	6.99724	2.67598	2.45331	4.88964	22.5795	8.28863	4.31026	2.38314	1.61307	2.38541	5.4797	2.19823	3.22141	1.07552	1.91429	17.4088	13.1295	12.4868	3.36776	1.65009
	10.4743	18.805	10.2284	5.52399	10.8943	25.2838	2.73524	5.96958	9.63329	8.49746	3.32381	9.91191	6.55999	8.09317	8.93917	3.50711	8.15979	6.43454	6.03429	1.06926	86.4436	1.69883	4.68487	6.73744	7.15675	1.50287		9.15396	8.61032	1.9686	2.6079	1.07835	8.01429	2.70938	2.61834	4.68779	1.2752	2.41037	10.4274	32.312	2.29469	1.23871	1.027	1.71187	21.2072	31.5751	1.22844	1.78435	3.5995
	13.5974	11.8286	13.3981	5.36556	7.43892	6.81604	1.85088	5.81727	9.86596	6.32665	5.98793	2.21585	76.1951	13.6355	29.7482	3.68632	1.35093	3.07298	5.66954	1.07631	13.7579	4.07242	3.84791	1.95406	18.6129	4.20805		20.6123	14.1917	10.3735	1.13834	8.06392	5.02315	4.98541	4.06172	9.54324	1.91473	1.51105	13.8284	19.2139	1.26095	1.72257	2.83182	1.98728	21.6269	45.4315	1.32035	10.8877	2.5214
	3.47195	18.5349	3.3314	7.77196	8.51184	3.64011	4.42085	2.19242	3.61467	1.54582	2.34531	9.45929	12.6544	32.1888	2.25547	4.31661	6.92321	4.67266	1.68558	2.23238	62.7772	2.96775	8.9893	1.6004	11.1492	9.74355		2.90487	7.93512	2.54485	8.14118	1.29222	14.8952	28.9636	5.10929	5.36969	1.43617	3.1924	12.8142	10.2927	2.40549	6.84262	1.32754	1.73352	6.46883	37.8658	5.5925	1.72891	1.81272
	9.90476	44.0749	4.41031	5.96307	6.69166	4.59068	4.16977	1.15527	9.10363	9.2825	13.7638	1.24166	9.62118	6.05431	17.1463	3.74588	17.2361	2.18057	9.08844	4.00537	10.0692	2.7318	2.90962	3.01773	2.80718	3.61092		3.00519	5.72504	3.78207	1.8885	1.19953	4.61656	5.62825	8.34668	5.88111	1.86011	1.61669	5.74026	41.791	6.36848	1.25544	1.5342	1.8116	2.10204	55.7836	1.33449	2.94688	3.15438
	7.68223	2.15395	4.00178	1.0341	6.41905	1.81555	5.92887	3.36893	6.38107	2.59819	6.17199	2.53779	9.44474	2.5327	5.4278	27.7403	3.36023	1.71409	6.38338	2.53313	11.3697	2.20763	3.85622	4.64841	4.87889	3.16659		2.15211	3.64543	3.46341	5.62361	8.16882	4.44226	5.57105	3.69202	9.66139	4.84556	2.74375	9.63187	18.0013	1.00175	9.4823	2.79937	1.72969	2.78593	7.16622	9.09046	9.46247	4.1764
	9.21923	67.9772	82.4951	6.87853	4.56935	1.24331	2.62813	1.16977	14.4868	7.19049	5.89121	5.01158	5.4383	3.87654	6.36117	4.03097	10.3076	1.07316	3.84377	3.78328	10.8508	1.16391	2.28821	1.05609	4.2052	1.23145		6.61595	16.6772	4.94934	1.21034	1.43374	5.88191	7.32438	2.20111	3.66212	2.98642	1.00335	3.58075	44.2556	9.298	1.39094	1.2658	2.99684	22.8731	40.3422	6.1939	1.38729	2.97563
	5.89439	6.63396	16.3902	7.65828	7.9311	6.05315	2.86661	4.01909	10.0577	3.50659	10.132	4.02405	8.97002	12.0777	3.71594	4.05523	9.26788	2.59362	9.54033	12.0053	9.01959	4.4168	5.24476	2.69747	2.08285	1.57827		15.3891	33.686	4.78287	3.42418	9.45109	2.6368	20.001	1.59765	1.02848	6.2242	8.40797	17.7411	26.0516	4.9691	1.95844	4.41107	1.25271	15.5452	17.7889	2.09586	4.74054	1.45172
	8.3173	3.47718	3.32365	6.94957	12.7661	12.0268	2.71615	5.92503	2.65766	3.46779	4.90613	2.38578	21.0236	1.39702	2.35776	2.49192	2.51619	1.37083	10.5179	6.01963	7.20872	7.84605	1.74661	5.78112	3.39425	3.32643		3.77259	39.3956	4.61196	1.43618	1.03857	3.53921	19.6792	8.74404	6.64178	1.06782	1.12545	12.7654	44.8467	1.42369	2.00611	1.74275	5.51499		4.19577	3.43345	2.33659	1.28068
	15.867	9.768	4.39481	4.22239		11.1991	1.75728	2.50792	1.14	2.58758	2.30258	1.45006	9.75072	3.39218	1.63969	3.20161	3.97557	2.42073	1.88488	5.45867	13.4256	2.73162	1.4038	1.14117	2.7849	1.44105		4.36572	4.63536	4.50607	5.76828	1.31392	17.9421	7.52532	6.27062	1.88929	2.45323	34.377	9.9941	21.0348	1.48459	3.09218	2.28335	7.65971		6.76242	4.10158	1.54508	12.3505
	4.73974	14.6905	7.46992	10.7503		4.44043	2.97982	1.28789	4.78098	1.1236	5.33293	2.45702	31.6419	3.00304	14.4701	7.55683	10.5062	1.3482	11.9857	15.5709	6.33276	5.01728	3.49848	1.46855	1.19946	1.43954		1.58095	4.01284	2.12572	1.57757	1.61324	6.65686	9.96367	8.0541	3.60586	1.57442	2.14085	6.30994	51.1947	3.63932	2.56943	1.68951	2.94209		22.2673	5.40116	3.97396	25.1818
	2.40311	3.1162	17.5577	12.6697		12.6977	7.60904	7.129	12.0992	5.94716	1.44803	2.281	12.7741	2.97171	3.83081	9.6429	1.33266	3.10662	2.43579	1.81728	6.62347	4.48816	4.08244	3.12641	3.98182	4.36939		10.0964	14.8157	2.66946	1.75693	1.96726	7.99549	17.5183	6.74435	4.30239	2.77228	4.86773	15.8101	133.728	2.36199	1.15884	2.05526	1.31043		5.15166	2.9297	2.67523	4.71124
	12.4743	7.15898	60.7391	20.0111		11.3109	3.71682	4.21596	3.4124	1.54127	9.40142	4.01833	10.8192	2.64977	15.3736	4.68883	3.91958	1.37995	4.61292	2.06273	6.52824	5.74479	7.07662	1.76788	8.96353	3.34653		2.23192	24.9136	2.61824	1.03426	1.49704	4.15452	5.18277	10.8442	1.7205	3.34365	2.43407	12.0943	10.1652	4.47859	1.58666	6.13366	1.88883		1.374	1.57399	6.81106	1.25614
	35.3475	9.48118	47.0592	13.6022		15.7455	1.84154	4.39831	12.8159	1.93591	3.74827	6.57784	16.1623	9.64271	10.3784	8.45125	5.03061	2.85389	1.93565	18.1926	17.2591	1.36863	4.48406	2.9821	1.20047	5.03337		2.62295	26.2322	3.80669	5.10845	1.50156	3.36778	17.2895	8.43122	1.00203	3.11838	2.66502	4.39872	8.89472	1.30855	1.03087	2.17844	2.0573		9.43554	1.36233	1.44311	19.7857
	7.64498	2.70661	11.0056	5.40534		20.4921	1.19969	5.58829	10.5693	7.55663	10.902	4.82794	40.5139	6.34163	38.8208	4.83937	19.2896	1.59779	5.54223	2.35312	7.88595	4.02837	3.25429	1.14919	1.85845	2.41214		2.04446	2.32261	4.79764	13.8486	1.71271	2.72666	45.7811	14.0844	1.23159	5.65428	1.56206	27.963	14.7414	2.53624	1.90658	5.90872	1.65967		5.69678	2.4096	5.56332	8.2827
	26.7133	13.8003	12.3707	7.30269		3.62217	6.95252	2.29707	3.08268	2.86735	6.61382	3.67315	82.3147	8.4621	29.0967	9.84803	5.35891	2.39055	3.34009	11.4794	48.4562	3.30479	1.06132	2.38835	7.93883	12.0114		7.04725	7.81429	4.05689	2.693	1.79093	8.82843	4.99399	4.90944	1.17363	1.88428	17.7598	18.617	7.51827	2.69437	6.39263	4.54117	4.04458		22.59	2.68092	1.98642	5.27202
	95.0919	4.27188	22.9926	38.0321		2.72129	6.48893	3.98646	11.0983	4.65686	3.20784	1.95563	12.3827	5.65858	24.7209	10.7959	1.79711	1.47048	4.13678	16.7592	4.38036	1.09494	3.5944	6.33656	13.5841	4.17487		39.4511	8.44107	5.68369	16.5782	1.46991	4.22175	20.651	20.2958	1.02341	2.69638	6.98569	10.029	6.73908	1.62302	1.68284	1.05094	5.47383		61.6191	1.69242	2.36934	13.132
	9.54361	40.7345	10.9104	15.5542		2.24547	1.95682	1.27805	4.82541	9.35191	5.31603	5.11407	9.20178	11.8629	15.269	3.78724	13.9796	1.17154	1.72549	12.9188		7.76256	5.21155	4.0903	3.04829	5.10374		38.2744	17.0086	6.09544	13.5475	1.22937	9.17863	37.5586	3.44308	1.51852	1.84125	3.51212	6.9165	4.93925	2.57487	1.44489	1.12151	5.19757		26.0303	2.94251	1.82008	25.2631
	40.2574	7.67141	13.3046	5.8597		18.7554	6.15412	1.33607	8.22086	15.1305	8.07218	13.0978	2.51365	9.39537	3.10346	1.98736	10.2351	3.04155	6.56272	6.1743		6.47213	2.54155	2.07165	6.23841	4.67449		9.97555	1.93637	10.3218	6.90465	6.11022	3.88877	12.3127	13.9398	1.22371	8.08818	2.47021	3.63146	88.8851	4.42537	7.11277	1.57736	2.7087		21.9281	7.31143	1.96335	7.17446
	6.05233	10.7901	6.79732	29.6058		29.8261	3.21519	1.61738	7.84787	16.6218	7.19368	1.90382	2.00041	9.31623	41.9975	2.85807	3.89011	2.59204	2.41306	1.47555		3.29693	3.62508	1.51087	1.15083	1.71147		3.10624	5.23523	12.3298	1.99062	1.12402	2.45326	11.9008	9.93576	1.45551	1.7088	3.17071	18.2265	46.2308	17.8289	2.94414	3.44833	3.11778		5.34108	2.71848	3.87944	2.92446
	43.9396	11.6288	32.9309	14.9951		27.5168	1.07376	2.93532	14.5119	1.00387	6.66687	6.41973	16.9647	1.94363	3.26885	2.3105	18.1485	1.58176	2.2082	4.62714		8.02361	1.02116	2.90593	6.49978	2.07035		33.473	7.40877	9.52978	15.3594	1.54496	5.61647	9.30652	7.80711	1.34355	2.35414	2.38788	7.22078	24.4571	1.57312	1.82127	9.42542	8.6786		12.3792	2.18114	1.64183	1.19236
	47.777	1.02521	6.38435	6.62169		11.2554	3.0964	3.70308	2.93769	1.49066	8.78398	4.86795	20.175	8.90359	51.7531	2.04361	4.84495	1.80902	1.2842	9.34242		1.65803	3.03976	8.30889	3.38918	2.18746		14.7733	5.15072	10.7212	6.88043	1.04716	5.0872	10.7652	3.74578	5.61949	1.04027	4.39297	1.21181	43.6257	2.60532	1.93251	18.5241	1.40124		3.90908	2.11973	1.03489	9.38323
	36.2735	9.51056	24.2603	1.79361		3.07952	1.31861	2.2463	4.33375	1.35456	4.2347	1.90001	9.78993	5.37703	23.8211	12.8335	40.1199	2.68949	5.53743	4.04944		1.83457	1.93133	1.16611	1.87466	1.07161		6.66282	8.44152	7.79463	4.30657	1.05258	15.752	25.8159	3.92226	2.20549	1.43182	3.02652	12.3914	34.404	11.5318	2.10941	7.55476	1.9945		7.9136	1.21209	1.41706	1.7265
	12.7331	9.29964	4.26252	1.69557		9.32999	1.47868	3.20523	9.17787	1.75102	13.0417	2.34006	10.8129	40.7577	8.69542	2.17374	6.01375	1.29445	2.17057	5.64198		3.44069	2.6212	1.41956	7.43027	1.31439		14.3054	4.14555	6.12794	10.9736	2.13365	1.62701	7.51602	7.78179	2.90033	1.57104	4.69421	2.47037	13.7929	2.97865	1.08941	3.11692	1.29218		1.06785	5.64199	4.19984	6.30526
	16.5705	57.8581	17.907	11.9816		11.7373	2.60398	4.6304	12.6604	1.41064	6.71054	2.88145	35.9704	7.13475	2.83784	9.29274	9.13703	5.30982	4.07262	4.30084		1.24758	3.23582	2.66629	8.90782	6.32866		15.3708	7.11421	3.10534	11.06	3.10394	8.00888	4.68651	4.98268	11.1523	1.04945	3.91137	9.56996	29.1933	8.52961	1.30228	1.49325	5.03716		10.0376	5.74451	2.22495	29.7893
	11.1504	28.0735	36.677	7.33643		17.052	3.78135	7.01088	5.05809	1.09056	9.23427	6.6247	1.63562	2.64977	5.00505	3.31521	3.69147	1.13382	4.62151	4.48724		6.8824	2.33278	1.25208	1.5905	4.25529		8.22399	4.28902	2.5685	1.93105	1.53366	15.5694	16.8747	7.35949	7.10707	1.79001	9.91821	55.6001	50.3107	3.3773	1.69664	2.00202	2.42565		2.17644	1.98892	1.14988	22.3232
	41.0585	48.5591	6.51223	1.66999		2.44893	1.79675	1.51014	2.242	2.22053	7.82849	6.93826	10.0812	9.13237	19.6651	5.60586	7.17194	2.28399	3.63335	5.09204		2.41183	4.98126	2.22889	7.21145	3.14196		20.594	11.4057	8.00937	4.51735	1.51467	6.45356	9.46385	3.6628	1.99056	1.85286	4.71751	22.8794	6.21015	1.33055	3.83324	9.71651	1.05496		1.9595	1.55544	1.36199	10.298
	52.9015	69.589	4.88749	4.84371		7.91911	3.46536	2.57319	6.62661	1.25242	17.0595	5.1255	15.829	2.63575	12.4782	2.42851	4.2078	1.03009	2.4954	7.8477		12.4682	6.50893	1.35987	22.4007	1.72504		50.5199	41.1908	4.75479	6.29392	1.21083	2.95194	8.97402	17.2637	1.82909	13.0662	1.52711	7.39794	9.44438	1.72409	1.06307	2.85513	1.37111		13.9646	3.54878	1.39585	25.3689
	54.1249	4.10644	29.0471	3.54744		11.4478	5.45022	1.26769	4.06425	2.6573	5.88839	2.25319	11.4235	4.23064	5.93883	6.07403	5.788	1.34978	2.50879	9.26376		3.70038	4.18869	1.29039	2.57772	2.26889		18.7363	12.1253	2.81131	5.58107	9.1373	7.02872	8.94184	11.1668	7.95776	1.47242	4.06883	3.80138	28.2809	1.81288	5.47342	3.03627	2.519		1.73154	1.80112	1.06429	8.72362
	7.58227	2.12142	3.79198	10.6039		10.1702	7.34108	1.71063	12.1705	5.46675	3.44166	5.70041	20.7786	2.73387	12.8801	3.5606	1.91735	2.52289	5.1214	9.11284		1.573	10.913	1.30108	3.63333	10.9107		34.7757	2.57727	3.75695	6.88436	2.49491	9.1917	1.62034	2.97636	1.17026	1.48354	13.4797	12.9834	41.0912	3.39751	1.25921	5.83784	1.34013		1.54359	4.83953	1.49261	30.8758
	27.5856	7.34401	9.3576	9.84976		7.28456	5.48722	4.94849	9.06855	4.76961	13.0562	4.14901	9.12055	10.2812	1.24724	8.78431	4.60977	1.77256	1.96192	4.34578		4.68793	4.37222	4.59274	5.71466	1.61446		10.7657	13.1145	5.38965	2.88283	1.31663	71.1918	5.87566	19.7726	4.72323	2.0815	1.39296	18.3226	13.2905	8.72996	1.29224	2.71809	1.65883		80.1451	7.48068	2.01805	3.0983
	5.40405	70.1886	3.13323	1.52718		6.52501	1.9524	8.82305	3.26741	10.0348	5.94802	3.43693	18.3636	11.374	4.8677	4.23996	15.7803	2.12274	1.39711	9.82208		2.33107	1.52818	2.09125	3.85823	1.49081		11.7842	34.3933	1.26036	1.25813	3.00312	8.13984	4.31539	2.37447	4.04133	2.24054	10.4303	9.18205	5.38374	2.42058	3.44515	1.19964	1.11352		7.54542	3.11661	6.18477	58.5117
	6.7652	3.47473	38.4445	1.60072		29.4815	4.17107	3.74038	5.47434	7.52784	10.5433	5.3579	18.2453	3.74216	2.28599	4.54821	5.29231	1.48368	4.96757	36.6598		7.16344	2.08808	8.30488	3.41248	1.46216		47.298	50.557	3.42548	5.81345	1.18823	19.9011	7.69764	3.99511	4.11616	2.29806	2.00067	7.67651	9.24248	1.13506	2.69698	3.77848	2.03184		38.2406	1.61421	1.24886	27.0842
	21.4229	49.1684	3.21792	10.8927		4.49184	9.30413	7.25126	4.00637	3.83909	10.4635	9.41128	31.8946	2.36327	12.6537	11.5542	2.78673	1.54592	2.00739	1.96997		4.76339	2.3077	4.38695	5.38491	6.55333		2.52629	6.98106	1.25544	4.50426	1.95505	13.9265	14.1911	17.3354	3.57717	2.37831	6.69769	44.9033	1.34881	3.5472	3.04827	1.49293	1.37408		10.7075	1.73352	1.23509	51.1935
	23.0009	13.9458	34.2285	1.1183		7.95861	13.2135	1.24023	8.89726	6.70886	38.8513	2.18537	21.9332	35.4957	21.9587	3.82363	16.7693	1.00494	4.1734	7.53395		5.31299	2.56443	5.27067	1.18781	1.37521		5.09139	1.97268	1.16136	7.17827	1.93335	8.6331	14.6244	13.2662	5.60318	1.1297	5.76584	5.43336	24.3151	1.05497	5.32622	5.68348	1.26672		20.8805	2.35923	1.37315	16.2416
	7.27487	37.7796	34.6863	13.3777		16.9912	1.02962	11.5221	7.99519	7.00893	7.5632	4.87747	10.3501	31.9778	4.4833	5.58546	1.2466	2.35472	1.18594	6.03307		3.00292	2.31786	1.26188	1.93849	1.84667		6.30547	6.56769	4.64447	4.44927	2.41398	1.14649	20.8197	7.83243	8.29421	2.03655	2.51078	6.02609	8.83945	5.041	2.89563	10.2716	1.06133		11.8469	1.53202	1.54247	17.7816
	7.25742	22.3542	5.7948	3.83198		3.3507	9.62973	2.23749	7.73972	3.77817	4.33095	6.13474	18.7578	76.6948	13.2437	3.52034	16.1581	4.92539	2.70657	2.13411		1.18082	2.73117	3.16694	10.1361	6.41209		12.5326	3.55352	2.22225	8.0011	2.27834	19.5398	17.7264	4.64453	2.03389	5.60111	3.37516	20.4314	5.72382	2.13758	3.03405	20.4162	1.07236		3.83309	1.37957	1.05349	7.81165
	34.2041	11.8957	9.77776	7.71263		12.303	8.78627	1.50807	6.36412	12.5014	3.42241	8.76779	23.6801	15.6554	30.0499	8.3917	6.81535	1.36675	3.63714	4.86091		3.03605	1.82169	5.09294	8.98582	6.26432		11.1267	18.168	4.16131	1.10888	9.76578	16.0111	3.52096	13.4786	6.26876	8.33954	2.39269	10.8391	4.5462	4.14339	1.6473	15.4507	10.4503		6.78812	1.96197	1.34152	21.951
	7.95993	3.08227	1.28152	30.2157		11.6255	3.5413	1.37337	7.60058	13.1801	2.80028	3.49408	11.8359	8.99717	6.83013	6.36683	3.25354	2.28871	3.0832	15.084		5.26553	1.1508	1.76209	1.05763	2.54383		6.64744	5.68559	1.97255	3.36919	1.11814	1.25548	27.6715	10.3814	5.22959	9.20482	4.05316	5.16861	7.01468	7.91781	2.51214	2.04739	2.87462		10.0086	1.26291	1.10857	34.1507
	4.82037	8.02854	6.90527	4.45472		6.82668	2.80638	9.99282	5.81692	4.31769	4.22484	3.84727	5.29337	5.67095	3.12862	3.23194	4.94692	1.44439	2.98266	5.90638		3.62031	4.22174	9.3485	9.51109	1.93112		2.06716	5.79767	3.42154	2.81934	1.55084	2.01034	34.1628	4.59427	2.19367	1.32885	2.93132	7.62383	12.4345	4.02287	5.73605	1.20436	10.5407		21.1822	2.79934	1.92241	8.67315
	8.54362	29.2354	25.3088	8.05651		11.1528	6.72897	16.538	6.44363	7.18261	1.6828	4.67478	22.2293	28.9096	7.91342	5.38584	1.6922	4.37593	3.52524	21.0979		5.16804	5.13156	7.51737	5.94665	8.12205		1.97636	8.98266	3.92194	1.58935	8.39534	19.2667	25.2853	10.3312	5.08444	4.29594	3.83426	1.21641	2.68342	1.36023	1.20609	4.83699	3.52856		27.1022	2.04991	1.04866	4.65727
	7.95662	14.7692	10.0883	3.20108		3.54803	4.09266	1.34073	5.78067	7.84337	1.19261	1.88286	10.4201	11.8679	7.11802	1.11555	1.64445	3.33012	1.93717	15.7538		2.93548	9.40736	5.82745	5.61639	1.78435		7.85932	10.2248	3.99385	2.25049	3.0307	2.71392	15.1622	6.38204	3.74258	20.1876	1.62472	10.3827	5.48546	2.18953	1.70334	5.31678	5.17678		27.7615	4.19084	2.00503	34.9772
	41.5125	3.7563	24.5116	5.0906		11.4104	1.57371	1.09828	7.62104	8.64902	13.4915	3.88879	34.4412	7.64837	1.37201	5.65383	2.91404	1.13382	1.85457	8.33419		5.45778	5.06344	6.90403	1.68826	6.81269			3.91376	4.03424	3.72267	9.94076	60.1022	25.163	14.6091	3.76171	9.26815	1.79703	20.3247	1.41253	2.22919	1.83005	1.30549	5.37538		12.6046	4.98447	1.28049	13.2666
	5.57001	3.47858	7.08518	8.89132		15.2498	3.79874	1.58992	5.56261	1.14724	3.49378	4.82375	33.5702	28.5856	1.45635	3.55508	1.66862	4.78205	1.50144	1.75008		7.63246	2.65678	2.32287	1.1873	5.92755			4.03503	5.69994	2.48287	2.15852	7.82406	5.43805	24.5585	5.98013	4.32446	4.93762	3.44969	7.21043	2.13579	3.41294	5.60472	3.29389		5.47433	2.63319	2.64583	17.0806
	4.52051	8.35313	8.09213	3.48598		9.79436	1.65965	3.04981	5.28024	8.81027	3.71211	1.3971	31.2624	31.2634	3.2703	3.71555	1.53011	2.94033	3.26709	1.26315		3.97254	5.31746	9.03982	2.28901	6.64833			3.31344	4.544	11.4469	12.3362	15.845	2.14876	3.81785	8.10179	8.70886	12.7166	1.0386	2.84349	1.58054	2.46154	12.6806	11.7425		3.84668	4.16919	1.41669	21.9286
	2.0363	8.76308	5.82857	3.61813		24.1809	1.63862	1.3713	4.58046	20.2933	2.22605	4.10177	7.29869	30.3243	22.6535	3.18232	4.51665	2.01272	3.33352	13.3017		1.89757	7.81885	16.6819	12.4054	7.70637			3.85861	1.28597	3.68209	6.65596	44.4156	30.3722	18.411	4.57132	6.92271	5.71804	3.40491	9.46166	1.5547	2.71371	10.8972	6.92897		27.9127	1.688	1.09629	11.4111
	37.2881	7.42201	6.76853	10.5826		12.9483	6.20033	1.68835	4.31329	2.73004	1.17805	4.18102	12.1474	9.92137	9.5894	4.15725	5.59232	2.94851	2.46812	13.194		1.7731	4.39594	2.9331	4.61904	8.58648			6.51142	4.33664	1.64237	1.38129	20.6996	26.7276	12.1084	5.56042	4.26403	11.308	5.60526	1.94223	3.62985	2.66353	3.69878	4.69385		1.46834	1.03269	4.46033	7.43593
	6.32437	5.03335	15.7281	11.7535		17.4847	5.32026	1.51273	6.63304	1.68313	33.7903	7.3585	63.386	9.29562		6.16942	2.26451	4.21938	2.26453	12.5008		3.15488	5.28645	2.37543	2.49921	8.15975			17.3699	5.3734	3.38032	7.44404	6.31781	31.9711	14.2639	1.2856	6.8705	39.0973	7.81219	22.8404	2.16061	18.6844	8.8864	1.16996		18.9394	6.95439	9.53094	12.3974
	28.0448	10.3074	16.0038	5.55739		4.0198	7.39288	1.92562	6.27	3.45567	23.1559	4.87175	1.922	35.7541		6.34258	4.26202	7.2669	5.59881	3.84144		5.29438	3.26666	4.48851	1.23998	3.53753			1.41742	2.21585	3.93345	1.79002	12.3485	5.90212	4.25145	2.94196	9.18742	4.79704	4.25317	1.72421	5.54738	2.75344	6.51674	5.50608		19.2811	4.93453	2.63281	3.8848
	15.8199	19.6584	8.53388	32.2782		24.2098	11.1056	2.90372	4.90434	10.9884	5.69635	10.4293	6.00125	12.9005		1.5986	2.02285	3.07173	2.25948	52.2413		3.94829	5.11089	14.9702	2.19124	7.55257			6.13079	1.66669	1.93432	1.69688	2.95322	17.8386	4.59194	2.93352	2.90279	5.91606	11.6472	2.90605	1.83181	7.92952	2.80945	2.44517		29.2217	4.17935	5.77989	2.38191
	7.41066	16.658	4.60406	14.5919		27.418	5.26548	1.07652	4.05957	9.06214	8.42949	5.8231	5.64696	41.7219		6.2196	2.32581	3.67463	2.02229	5.34939		4.52504	1.62224	3.27206	1.68016	3.0158			6.32021	6.31067	4.22606	2.97373	4.36387	10.8332	3.51943	6.17368	8.02679	6.46754	1.70707	14.1906	4.10168	5.05773	2.80157	6.99347		23.7382	2.74013	7.91107	5.42063
	38.4517	5.24602	5.19473	16.7617		5.2191	4.93807	1.68473	10.8095	7.29991	15.2635	7.0015	8.75996	14.2023		4.28022	1.62559	1.53901	1.12608	1.24067		6.95958	1.58953	3.31037	1.48818	9.9451			1.04418	1.36822	6.31225	7.78314	13.5278	2.04794	1.47455	1.34861	4.39939	29.6623	2.82008	26.1694	4.66486	3.65508	1.19586	1.87695		17.1594	1.25319	1.26263	3.82732
	13.8892	1.7615	16.7722	8.45331		11.0872	6.59538	16.1976	14.8101	1.94985	5.54375	2.25319	20.9102	30.5667		1.35156	5.49566	2.53106	1.05838	6.67114		2.08691	2.42818	7.77928	1.06776	6.3935			15.4235	5.82455	3.23631	1.00646	13.0384	7.72481	10.1781	6.11291	3.36347	3.75272	19.0062	12.9565	1.62839	1.45827	6.6062	1.30067		37.6713	5.16122	1.03787	15.7242
	8.45073	59.0354	4.63894	5.98545		6.55991	2.08599	18.8765	10.5576	3.38595	20.4053	3.26397	9.57637	8.88134		1.13761	3.8459	2.47008	3.88545	2.77726		4.86583	2.62594	5.06533	4.0573	24.8683			13.5012	7.92269	3.58325	1.87548	34.1013	15.6384	1.73323	10.7731	1.93455	9.77241	1.28952	29.1396	2.11046	1.21948	2.5675	1.88883		18.693	3.40473	1.30691	1.92698
	31.1263	6.99388	9.59286	23.5002		27.2857	3.26037	1.50651	5.95664	1.27485	3.60506	3.85412	11.0601	15.7774		4.98715	5.74675	3.67746	4.32168	3.54026		3.28122	4.76384	1.26678	10.0242	6.18541			28.3405	15.2829	6.2481	1.66614	13.0126	3.03043	9.32062	1.21246	3.15319	5.84818	5.08497	8.05412	1.09566	9.62407	1.64919	2.71633		39.8268	1.74589	2.15239	2.5228
	30.9378	31.4237	16.2551	5.30588		28.7431	5.2525	2.32245	8.13609	4.094	22.8253	4.57039	8.82788	12.2636		4.53663	2.80618	7.67775	2.27059	11.8579		7.64782	3.11263	10.4362	25.6542	11.2605			46.8243	5.88759	15.6173	6.03698	4.18766	24.9192	11.3464	1.65524	2.11872	6.22454	9.29665	15.2054	4.12855	2.00486	2.38983	8.14476		40.8891	5.51827	1.17853	17.9421
	4.91938	10.3745	1.85779	13.659		4.33284	5.00596	15.8738	3.92218	10.0918	9.73009	2.05736	12.0424	23.7279		5.97091	2.53328	2.41067	2.50677	25.9152		8.46155	2.41751	4.14598	6.6259	3.02083			47.4924	4.78976	9.36461	2.43613	25.3799	10.3369	25.229	3.36618	2.15981	5.54051	4.23671	2.04203	6.62334	5.76156	1.10828	9.11994		40.431	2.90142	1.13797	22.0674
	5.6049	3.30124	14.3641	21.1894		9.1268	4.59793	1.3972	11.5397	4.69232	41.0539	2.24595	3.38257	3.86871		1.7155	3.66908	2.8322	1.34685	1.37354		2.27866	4.55591	4.80075	8.25692	6.68402			5.03639	2.72118	6.85425	2.12506	12.5642	16.5365	27.6665	6.12867	1.50336	18.5202	1.53122	19.4354	2.96253	1.3119	1.11616	1.7925		20.0057	1.56604	5.53503	11.8345
	14.9439	1.42466	54.1582	14.2235		6.85157	9.69269	1.70752	2.38055	10.7856	8.0717	4.82642		89.731		3.33175	1.99633	5.63108	6.53847	8.10924		3.79958	2.4819	4.63238	17.8805	3.06606			50.1712	4.25784	2.63867	2.46914	36.544	1.66252	23.5094	4.15273	10.1286	8.51682	4.69048	111.182	1.47333	8.8366	3.04415	3.27776		7.42942	5.88149	2.43669	3.27775
	8.74729	2.22356	1.65685	19.8668		12.1111	2.97099	5.89809	4.78566	70.069	4.44176	4.41761		6.75715		15.6474	3.4339	4.19298	2.61084	18.4306		1.38826	3.30293	6.49647	7.40191	3.26209			63.9945	2.37789	18.6651	3.83189	15.6758	13.697	20.8392	5.89968	1.49708	5.90321	2.95707	4.77804	4.76849	1.39847	5.18951	1.04223		40.6094	2.13651	2.62871	3.42145
	7.9736	19.458	7.14828	4.96129		26.1918	8.26724	9.28723	82.1782	3.64207	2.43029	4.23511		12.4903		3.27165	3.32899	1.89075	1.45445	9.7064		8.39087	6.37709	1.7799	5.10733	7.35654			5.27312	1.24706	8.43509	5.94836	18.9522	2.31108	58.0551	6.78863	5.33717	18.1482	11.2685	9.81364	2.69283	4.25729	14.9189	6.50036		97.074	1.34466	4.97238	5.45498
	4.29703	15.1078	6.45244	44.7397		25.6413	1.02677	11.7009	4.93707	6.40667	6.0269	2.9527		9.47617		1.26168	1.42225	5.12877	1.88008	1.7611		4.13849	6.35235	1.51042	2.08335	4.69057			9.58478	8.82252	2.86385	1.69191	1.54384	17.2301	16.9828	5.68926	2.47885	2.39189	3.13686	14.0332	1.16219	4.33466	1.4022	5.06857		23.3293	7.51382	1.1923	46.8958
	10.5054	35.2059	6.11144	16.8203		25.1119	1.07506	5.71055	8.29861	1.06965	4.1962	3.8446		4.98171		3.28654	2.69183	3.14151	1.13568	1.0415		4.99662	5.73433	2.54291	15.1168	3.03892			20.6318	4.0106	3.54855	3.27033	13.1977	16.1003	21.6585	4.65572	1.34771	1.06159	6.51016	23.3267	1.36919	1.76188	15.0345	2.97222		4.14108	4.80904	6.20338	5.48442
	7.42197	6.69132	61.8728	18.3525		15.8761	2.42158	1.17081	4.1724	5.26367	28.5071	7.99818		50.658		9.15432	1.74996	4.7481	2.3292	3.66607		9.80884	4.44051	4.22036	7.71595	5.21834			5.7089	2.95315	14.2282	2.50214	3.32667	12.9834	20.6211	1.17138	1.95195	6.07793	3.15596	3.23001	5.51207	3.93695	12.3379	4.2627		2.20544	1.5382	5.10188	23.1616
	10.1928	6.0904	8.03844	2.60924		30.5207	2.71044	6.37263	7.5468	2.1493	10.2367	5.1213		20.8795		3.42715	37.3916	2.97617	6.16488	5.58205		2.10758	3.47917	1.69795	8.49297	4.08038			6.283	6.15158	8.58238	6.38693	43.5794	5.9772	15.7634	2.90202	1.18239	4.51467	1.56678	7.81191	5.9097	1.92833	1.98344	1.60196		8.51966	2.14402	1.39846	22.3968
	26.2687	82.9899	26.4265	4.08314		17.8821	3.63114	1.51377	1.76086	4.00761	8.35718	4.41532		9.76843		1.88921	2.88575	1.91842	4.60181	8.73872		1.67015	2.63814	3.63686	2.71449	7.93306			20.2805	4.98677	20.6786	4.78003	11.6896	7.21927	40.8155	1.58998	7.85711	4.39417	1.58983	1.57528	1.02657	1.5348	1.96485	5.37665		9.54786	4.70166	5.47363	10.624
	3.29844	39.142	3.86228	7.22524		3.82978	1.2781	3.22543	2.17945	6.13115	5.64188	3.51847		23.2535		5.29375	5.40901	1.31111	2.61135	65.2427		12.0557	2.66068	2.34737	2.22012	1.63305			51.9233	4.98283	4.58281	7.70357	10.7865	19.582	13.9137	1.53934	2.1806	8.59113	1.24342	70.3256	5.61391	1.17389	1.52979	1.68259		6.5396	1.64116	1.7557	31.4751
	2.35644	50.9327	25.1239	5.67391		34.5475	1.19307	2.13492	2.12332	3.71694	29.4574	3.92156		2.0203		5.67534	3.82055	5.7609	1.17811	6.23092		3.20525	17.7439	2.26764	1.80831	4.3915			3.05385	2.27151	4.43749	3.95939	25.9984	32.5761	8.89481	5.80291	1.74216	6.52819	2.68112	3.48488	4.06893	1.06098	1.21571	2.50755		7.14089	5.37244	11.0507	26.9167
	10.8109	84.5936	3.74713	8.6153		2.29976	1.84037	5.97632	6.02153	4.31223	12.8558	4.13225		2.32988		1.08411	9.44765	2.95479	1.79243	8.96544		1.00052	8.39382	4.26134	1.01863	6.05472			12.1311	3.9904	5.57779	1.44007	37.6096	5.22782	3.61021	13.3837	1.43375	2.44571	4.30322	7.72324	1.91241	5.21999	3.60301	2.10738		10.209	1.1383	1.27677	3.7404
	10.6214	49.1212	13.831	9.0455		3.00024	6.82322	6.17784	1.21717	5.14122	6.13442	5.04206		12.4837		2.348	14.0999	4.62079	2.39942	8.83544		1.02613	1.10199	5.521	4.40022	12.3135			22.1331	2.14788	16.3013	2.27788	30.745	12.0781	22.5654	1.66143	4.21134	1.60383	20.38	29.4363	3.36757	1.62388	6.97637	12.2564		4.22918	1.69949	2.30868	4.08598
	30.0368	16.9109	17.05	1.27389		21.7473	1.494	6.63943	4.90083	3.86758	6.13818	2.54389		5.45824		6.82508	3.74275	5.10142	3.20899	4.04658		2.16187	3.06009	4.3139	6.31034	5.11128			15.2623	1.87404	30.7738	2.56137	6.85059	4.11018	14.7618	2.16104	8.71804	32.9599	10.0982	6.80625	2.30365	2.24407	1.20373	10.4647		21.8474	1.01545	1.12829	17.6407
	62.1957	41.3767	11.2082	4.42488		28.1977	5.9425	7.94079	10.6558	4.40862	10.4424	2.83611		6.82435		1.15029	16.9833	6.52098	1.97026	2.65784		9.32122	2.83132	2.8596	9.27657	1.40335			7.25185	1.30419	20.3035	4.23113	30.7131	14.8497	8.50796	2.1661	7.32973	12.006	25.4222	4.80222	1.02069	1.42899	2.99941	1.2943		22.9835	2.97698	6.07983	47.1286
	39.5059	13.6492	2.11022	4.58439		12.1398	8.01941	3.84296	3.77311	2.5018	10.8936	3.1009		3.82501		1.91292	3.94787	2.55495	1.51432	1.03907		3.79958	6.88343	4.80654	1.18021	9.58019			12.5474	1.60069	5.91949	1.30714	13.871	31.482	2.89377	3.65931	2.15401	15.2965	9.45076	51.5113	1.86661	1.81081	4.94126	2.79272		5.62887	4.41178	2.06494	18.5365
	13.4116	3.849	13.0942	8.13928		39.2167	4.51549	6.58556	6.70846	1.78588	10.6879	4.30331		2.06029		3.55839	9.79187	2.71118	1.7649	9.13399		5.60905	2.98723	2.50772	7.77268	3.69134			7.91405	12.7583	19.2667	2.31179	4.1542	11.9043	17.5504	2.99822	1.89588	8.20513	17.641	29.9848	5.81093	2.00528	21.3966	1.33377		61.2326	2.532	2.15611	5.78444
	6.18105	62.875	8.86658	11.6977		13.9465	1.36599	3.66992	3.23643	3.87607	30.797	2.41816		8.26053		4.85977	3.23881	3.73341	2.37567	5.76096		3.30598	4.39696	2.53445	2.87506	5.77475			15.0865	9.06632	19.5318	5.01243	45.7851	19.3031	4.67141	3.68238	3.20685	1.50141	8.00581	7.84799	10.6825	2.95627	3.42187	2.01402		13.6221	1.19132	4.57643	21.6306
	24.6143	19.5731	8.27757	1.73073		12.6711	5.35882	14.7517	2.96166	2.28993	8.76896	15.4119		23.789		4.66346	6.96329	2.29122	2.56588	2.7896		2.96587	2.55731	6.28846	5.55409	8.62519			10.5149	2.69754	33.3548	6.84134	18.9232	9.78205	18.9673	1.28335	3.38957	4.37851	25.2108	9.80212	1.85151	4.03899	10.1468	2.37982		72.9646	10.7321	3.30413	10.7305
	31.2239	12.1063	1.14146	15.5766		20.8987	2.11105	5.21685	6.53892	4.68414	11.1974	1.83105		6.99789		6.67178	16.632	3.28297	2.0814	4.73533		4.94728	2.40073	3.36204	7.7195	4.79512			10.5261	3.98942	5.26359	1.28679	9.99851	9.32083	5.99909	1.47295	2.91971	6.68163	5.48736	26.754	21.4797	1.03087	3.68744	7.66311		18.87	1.41978	5.97563	10.7235
	5.72372	15.7356	3.95527	5.64371		23.1231	4.98675	5.24845	3.94206	2.59819	12.6341	8.25535		8.86814		3.85892	17.5467	3.0777	3.55479	6.47021		2.43266	4.35239	16.1844	7.15472	3.3028			10.3028	3.10387	15.523	2.79784	6.8525	7.53389	11.6148	5.87098	9.30682	10.6721	1.98367	36.7826	8.3661	3.08089	1.03582	12.7648		42.4364	1.07069	1.32254	18.3017
	4.20556	5.77314	6.17566	13.3361		16.4291	6.94785	3.17777	6.28344	2.5994	5.04417	1.86153		4.8531		2.78363	4.66046	1.58082	2.9473	2.60121		8.52182	3.58389	7.76814	9.86971	7.42641			4.7526	4.50016	13.2706	1.93064	4.13285	3.05117	4.5261	5.05912	4.62465	3.41131	15.5085	52.5369	26.2876	3.19339	1.87444	22.761		12.776	1.16923	4.50945	1.43349
	7.19472	9.81032	6.89142	3.80676		9.41729	4.07526	6.14521	1.7024	3.36473	1.72412	11.9346		2.30556		4.96509	2.23858	4.72453	2.43377	3.65637		3.42789	3.33004	3.94465	37.6447	1.05754			13.5454	5.66744	8.67075	3.74101	9.21559	10.5493	17.4106	2.63927	12.3783	9.87965	3.77372	22.5126	9.14857	2.93912	2.93767	1.58329		37.527	2.89391	1.21091	2.39172
	10.0915	17.721	9.39025	8.67676			6.31094	4.28382	2.33203	8.0022	8.9455	1.399		1.3826		3.01633	10.1096	3.77962	5.65691	8.61974		3.3181	1.41007	5.9143	3.15264	7.6928			10.8574	5.24929	13.3904	3.58321	2.95545	2.4405	2.50498	4.62758	21.7707	11.6064	11.2448	63.9351	8.99632	3.83658	7.98604	2.15915		8.28693	6.7931	7.66398	1.83164
	26.7063	41.4474	11.8697	4.1961			3.27088	6.50629	15.1667	3.98609	5.25358	9.52444		59.0773		7.94779	10.755	4.08107	1.16675	3.94412		5.67478	5.17359	7.69777	14.7608	3.341			3.61225	3.52399	8.39713	3.93181	20.7391	4.67507	14.9068	4.05033	5.19844	10.0933	11.7235	54.2308	4.39338	1.25879	1.268	2.97223		6.95992	2.12988	2.38013	3.13546
	3.97454	2.45792	4.64337	12.7936			4.60182	8.85517	14.7265	6.1754	8.43418	1.0603		1.5582		5.5248	5.41726	4.37561	1.18645	7.32024		3.53614	2.28397	1.8387	12.1339	2.58202			16.0828	4.90157	8.37094	1.50789	6.54246	7.53031	21.027	7.10932	15.8003	4.98903	4.92164	4.33432	3.69868	1.13751	5.15895	7.20735		3.78391	1.93104	1.24961	5.65475
	81.6728	16.4719	1.95909	10.4142			3.64711	5.23187	9.10889	4.72021	11.3439	5.72327		1.39661		11.724	2.0759	3.32194	2.9814	16.3802		1.42856	6.07935	6.48088	8.91795	6.33971			13.8812	2.1533	23.1648	2.59031	9.02727	14.5072	1.75777	2.51943	4.12772	6.93347	5.07113	1.29853	1.65705	6.98355	1.07394	10.8119		69.1752	1.41359	4.06252	1.91997
	12.0745	20.1768	39.5195	12.2629			1.96318	7.8263	7.14867	5.50281	2.79418	6.10236		6.80373		11.1489	7.58512	1.56164	6.69331	10.0737		3.48952	2.09197	2.54425	21.0427	4.64282			17.0072	1.86271	17.5156	1.47669	5.36156	3.99791	3.23076	5.24085	13.3654	5.6349	19.2143	14.3813	5.37492	2.69949	1.05598	1.63931		12.3414	1.31505	1.92911	4.49745
	2.39132	5.57901	6.27419	2.09272			1.80661	15.2148	13.7431	3.15014	8.02804	1.03135		9.61344		4.88734	12.3104	6.60962	5.37147	10.077		1.01213	1.70205	1.81865	4.21736	5.89137			15.2423	1.38398	20.566	1.03766	2.23786	14.6495	1.82828	10.7377	20.0551	12.7278	2.77595	41.1588	29.9139	23.0203	2.49127	18.9244		30.0033	1.45601	1.20942	1.90384
		7.28035	1.83675	1.34636			2.75003	2.64572	5.29369	1.4758	9.54228	8.00961		102.093		4.50189	1.96038	4.18575	5.86934	6.47527		3.74853	4.31664	2.04849	8.0999	8.75537			23.8672	2.73743	15.9799	1.44549	2.21173	5.29002	10.5579	2.43223	1.09199	8.1252	4.45141	19.1559	4.13316	1.19355	3.55135	7.10295		3.71783	1.16746	1.94176	1.78608
		2.07106	40.6981	14.0597			1.91216	2.00592	6.65643	2.97434	4.52581	3.36112		5.98135		6.73023	11.3173	2.12022	1.58479	1.953		2.70823	12.1338	1.6681	8.12928	17.5962			11.8484	4.11107	11.297	1.54903	22.1192	10.5035	12.6807	5.33087	7.34858	6.35146	3.63936	14.1921	4.46682	1.09485	4.57961	9.67076		62.0053	3.71758	2.49586	7.23124
		8.72355	17.5239	2.96733			3.31385	5.81779	1.78425	3.00889	3.87175	1.46034		15.197		18.7658	2.11775	2.36729	2.08973	8.77375		6.98382	7.47925	2.70861	3.43224	5.65211			2.35489	1.32784	33.1565	2.07758	12.728	4.35401	18.986	7.21285	4.42839	7.31907	26.7664	1.9169	4.0024	1.14378	5.14509	10.5988		40.6017	14.3047	3.16234	19.8453
		6.35133	13.2952	12.838			2.13649	4.46307	16.7697	5.79288	7.49043	9.00591		51.198		4.96785	3.06493	3.48729	2.26024	5.77573		2.43846	2.43276	1.4886	2.8082	7.89989			7.09538	3.02211	19.1259	2.68391	15.9607	7.65903	12.5416	2.54475	3.7613	11.3172	2.49935	44.8985	1.67445	3.52837	1.25351	2.0573		12.5279	3.30574	11.5825	36.5964
		14.4698	5.63427	6.64513			4.31959	9.10384	6.31676	7.80245	1.54898	2.29434		10.1324		1.28815	11.6856	7.60702	2.01698	2.31941		1.46783	2.94859	4.32192	16.0402	12.8352			4.10385	7.8365	17.5222	1.07157	12.4377	8.15886	11.281	2.05302	2.77904	7.98421	13.7955	5.00681	7.38994	5.22878	5.48784	2.62297		8.2961	1.37559	2.97963	14.9265
		17.1981	66.0971	1.39645			1.21332	7.72062	9.3287	3.62813	26.582	1.68323		10.9828		5.40073	1.269	4.95179	5.6319	1.6734		4.28772	2.10705	2.77987	16.2788	5.71544			2.2975	9.66818	5.386	6.53388	9.78629	3.82415	9.8968	5.7624	7.1006	31.8907	13.5709	15.8438	7.00433	1.15424	3.54851	4.30514		3.91495	1.07555	3.05182	4.9671
		3.12075	27.9654	12.2754			3.7102	3.3824	1.18034	12.5345	3.67643	3.32531		1.65713		3.28102	26.649	7.21127	5.35126	4.79151		3.971	6.02563	1.40976	1.57024	5.50283			5.12494	2.62563	4.81061	1.11543	18.3365	13.3245	42.4736	5.3303	21.7717	10.9971	13.8238	8.28058	21.0823	3.21513	3.0369	3.73013		3.46491	1.07466	1.89636	30.2659
		7.50876	19.2776	1.67141			8.41991	7.10879	17.2625	3.64753	10.7696	4.46447		1.16618		4.75886	5.67189	2.41319	40.341	21.3143		4.35448	1.47938	2.08992	3.90382	5.18567			1.03723	3.69292	3.72202	2.22996	16.7972	9.42952	11.9623	4.06327	4.24663	5.81244	2.74434	3.68026	2.6107	4.64706	2.63996	1.30236		9.97184	1.80068	8.79971	19.8985
		2.42573	9.76945	1.37443			3.61426	1.1589	4.88271	2.46089	47.0306	4.27817		23.8656		1.37913	2.83742	3.54072	2.06473	7.1334		5.74633	1.79237	1.17814	13.2336	3.49984			8.75647	6.8879	8.40629	1.8913	57.7414	24.0797	8.82819	1.15282	2.62967	8.33968	1.21049	38.2635	9.15804	1.66779	6.99464	1.34268		10.3092	1.76356	1.91758	64.1475
		19.9788	57.0877	2.48526			2.83104	6.75185	4.54889	7.26899	22.7971	6.58127		79.1167		1.03228	2.61875	3.15503	2.33602	10.3857		2.95238	2.03673	1.32869	13.9088	1.11434			10.3891	10.402	6.27232	6.30736	8.70193	3.51739	8.06073	1.93374	13.6733	13.2504	1.90069	5.02408	12.3905	1.17682	2.62327	1.29854		9.70057	2.2271	1.77096	5.77392
		8.14851	6.45798	8.04656			5.15318	2.28619	7.42052	11.4439	24.8349	1.2066		12.7628		1.95538	4.51901	5.19258	3.42622	9.52243		3.31452	4.88788	2.38122	11.5676	3.70994			11.0195	5.71866	10.1115	1.90803	47.3908	9.10774	8.91195	12.6647	16.8265	4.34999	4.32034	22.1848	12.7498	2.44313	1.36692	11.7701		4.49164	4.01983	6.4367	19.0868
		3.03331	48.2356	6.5613			2.04107	7.69938	6.36997	1.03024	7.7637	3.39503		8.74901		6.49477	13.4474	4.19989	4.98727	6.09476		4.03264	4.03127	4.07605	5.60575	2.72729			10.9132	3.54566	2.73293	1.12854	27.9074	13.3373	8.39849	1.81953	4.51202	7.89344	3.7882	8.86824	15.1174	1.28639	1.81489	2.77787		11.0797	2.59652	3.67142	5.84472
		1.6891	18.9604	3.21848			5.30014	5.78774	3.33347	1.29152	9.61553	2.43111		15.4076		1.69235	7.14954	3.42693	7.01689	6.80576		2.15248	4.29732	1.63559	8.93821	3.39026			8.61749	2.76797	9.24875	1.07971	2.56415	11.1106	8.23292	9.11733	5.03553	2.84777	7.84973	8.55503	4.37726	2.34026	3.3009	9.67967		8.90803	1.51744	1.53912	53.356
		1.18996	21.3945	7.48563			4.86238	2.3841	7.80929	2.83976	20.0621	5.91682		6.72005		7.15704	5.91473	1.42679	3.20823	3.48738		2.80777	4.03584	1.50953	7.94946	6.5282			24.0481	4.35832	5.80362	1.10955	7.10838	17.9123	11.0098	2.88064	8.83116	3.02732	1.43638	6.68918	22.7028	3.12271	6.09207	1.00192		1.27856	1.33272	1.80482	19.5214
		7.99915	27.2059	12.4405			7.23632	1.73394	4.62664	5.64255	19.155	6.33553		7.32684		13.922	10.7208	3.05978	2.35041	9.663		3.73026	2.98146	1.1042	14.2588	2.37746			4.2935	12.5007	17.5896	1.49975	12.301	24.1648	10.9046	7.32649	9.64665	47.0212	4.08984	23.7117	14.0038	1.15131	2.91404	4.93702		3.88119	1.74721	5.07434	20.964
		7.87394	26.2759	7.91015			1.37443	1.56816	11.1217	1.11178	1.69219	2.83154		4.02288		8.15127	10.6719	2.03001	4.40933	8.0839		2.21668	3.44816	1.44584	5.76683	9.16099			15.2876	1.67359	2.05412	1.69101	12.0509	4.37689	14.0427	1.00091	12.0511	13.8955	2.80559	6.57172	3.85579	1.16553	2.30319	3.96311		3.3669	6.8068	4.37325	13.934
		10.9093	45.2119	12.6167			1.28473	2.06912	8.71194	3.55902	12.3806	2.70505		1.46463		4.97998	1.02557	2.91676	3.30523	3.46358		5.36165	1.75102	2.35271	6.08949	1.41441			7.67531	2.39316	9.87389	1.13804	25.9114	4.3297	7.50792	1.47183	7.6188	12.231	11.8157	4.50705	32.1687	1.04383	4.38523	1.4475		26.2194	1.76931	1.08103	4.34253
		9.06039	7.29332	11.3702			1.41325	5.73231	5.90578	4.17947	7.01573	4.23969		13.9385		22.3898	5.13376	3.79157	7.48141	6.80841		1.0695	2.3809	5.74593	1.82097	6.9288			2.20851	1.51352	9.59634	2.34842	6.16295	20.2377	3.93122	1.1275	13.5844	3.1932	3.14674	16.8287	3.65288	7.27504	1.09284	1.62785		5.93648	3.46129	5.82976	17.5447
		87.8595	20.8857	2.95632			1.65381	4.52472	5.09609	7.12502	5.13808	1.18755		50.6321		2.17705	6.45757	1.80557	3.99204	4.1845		1.57675	2.90775	1.48904	1.83667	1.47322			12.3474	7.38288	10.4349	1.23389	13.4134	15.0149		1.0718	19.4726	4.90066	2.01133	2.35908	2.69488	2.24449	3.36705	3.74753		16.9883	7.63534	2.54015	35.1524
		50.2286	5.72394	1.77017			5.34597	3.84037	1.16221	2.61365	10.556	1.59636		90.9058		10.4783	2.54802	4.02701	7.00148	9.15668		2.34831	5.61554	1.82088	7.04835	3.03641			13.084	4.14752	2.65241	1.01551	6.66578	11.4145		2.25781	20.6777	6.0213	5.73895	6.56789	32.3895	5.84479	5.41381	4.31363		7.55422	1.30886	2.06308	10.6695
		25.9748	17.354	6.26929			1.25058	2.53952	10.4582	3.11892	12.1571	5.7187		11.4915		1.23024	4.54199	1.0282	3.75334	2.19316		2.68859	6.02817	1.04451	2.99662	4.03614			4.79519	6.42937	41.4207	1.37993	8.14302	17.0564		5.00004	23.2238	15.3109	3.68942	3.30141	4.46272	4.01683	3.88276	4.51181		4.62049	1.62702	5.21463	5.81668
		76.0792	23.0375	36.0818			2.47104	1.58992	2.36594	2.51605	1.22736	7.07961		22.1784		3.84845	4.58384	3.38198	4.48461	2.18699		4.92559	3.83537	7.92404	7.81523	4.41714			12.2992	2.92163	22.5881	4.00189	36.3245	16.6338		1.00879	16.9155	14.2481	3.05125	6.95864	2.1363	2.47826	1.58335	1.49884		13.7877	2.08879	4.02382	6.9831
		6.38351	17.0606	7.96024			1.31523	4.44701	6.97563	3.77907	8.65299	5.85053		3.55336		7.05888	1.12518	1.95614	1.6002	9.44047		9.27751	7.17982	9.88835	2.08943	4.50108			7.36349	3.69144	6.32927	1.58792	13.1665	10.8332		1.07799	19.8289	23.2068	2.47564	7.31484	4.91255	4.60356	11.8543	2.58266		6.26319	3.30795	8.12951	7.18638
		32.8774	8.57207	10.6157			1.71119	1.41948	6.61784	14.0758	6.14663	2.63799		13.1717		5.47462	2.0258	3.53098	17.5911	2.98723		5.15933	4.06821	5.66576	1.31596	17.7857			24.4525	7.61092	20.4718	1.14753	31.6308	29.6944		1.28954	21.8954	29.7787	2.15161	5.96641	18.2465	3.56851	1.93524	2.22705		1.29911	1.56383	5.8506	10.2132
		33.4828	17.0838	1.47922			3.67671	3.29692	9.96418	2.44543	4.72348	2.97212		3.46143		7.81545	7.51026	2.52918	2.75457	4.15366		3.46528	3.47171	4.0707	16.0134	6.86848			29.8429	3.00635	8.9064	3.21336	8.20389	12.5172		1.85103	21.3965	9.40328	4.81495	1.66241	5.33219	1.57662	1.89491	1.11267		10.4134	2.05123	4.28357	8.57501
		2.14346	5.08567	1.78331			1.22072	5.59347	9.19249	9.31402	13.4037	8.71788		74.4354		3.64497	2.89341	3.38827	2.62297	1.03158		1.20387	3.14161	5.84615	6.2222	1.66723			33.9299	7.22085	8.68777	3.50273	6.19322	9.32798		1.36549	5.11674	6.22815	14.1867	1.51079	13.3403	2.49875	1.1086	8.39004		3.61248	1.69507	12.5828	6.56111
		71.4709	5.03585	7.29487			2.27346	8.23661	11.1381	5.31914	16.3481	4.99786		1.10806		10.7259	4.32686	3.39676	1.50775	17.6533		3.08897	7.58788	5.72589	5.68123	8.78955			8.74347	6.95587	23.748	9.91679	12.8877	9.66764		1.34411	5.69537	1.66047	39.5878	12.9485	10.1055	1.53229	1.12592	1.34904		10.4234	1.56648	5.25631	11.9754
		6.89384	11.2453	9.69204			1.15997	8.93547	14.4406	7.30627	7.95996	2.38806		37.8226		7.94117	1.04974	3.53789	4.83294	4.61679		1.84772	2.15077	8.71912	5.80786	6.12559			8.71792	3.69046	6.76064	2.41172	14.5042	4.26177		2.58526	23.2915	7.70747	7.21221	1.14039	6.96749	1.88734	2.08141	10.9506		16.9321	3.23372	2.04782	6.47069
		33.4682	7.88177	5.23056			2.6454	2.91149	8.78326	7.24959	8.46987	3.8587		26.313		4.50796	1.24307	4.17726	3.50301	11.2802		2.67152	2.35803	3.78341	2.63851	2.80871			17.6273	2.18187	12.5623	4.96405	20.0595	6.57142		5.19302	9.52096	8.63169	7.80889	5.95604	18.7582	1.02585	1.01062	1.32952		22.6491	1.24037	1.45577	1.68304
		26.3379	6.72425	11.2412			4.31258	5.09821	1.53929	2.61122	12.552	5.65888		10.5352		6.27309	6.69157	2.5801	3.01197	1.88448		18.0882	2.16552	5.78691	7.73064	4.54682			4.69745	7.64047	38.064	2.28919	13.9593	10.8432		4.84588	1.95002	7.57894	1.68928	20.3666	4.06867	1.59544	3.32043	4.15025		38.4425	3.29912	1.45502	6.89408
		62.7617	8.83391	5.08882			7.4095	5.18576	8.30563	10.2879	7.63833	2.02231		5.71093		2.58291	2.94174	2.89727	3.3805	8.13479		2.92985	2.87742	7.23765	4.28675	4.99618			12.1775	2.43552	20.3854	7.28262	1.61458	24.641		5.84229	9.3977	31.1516	14.8947	10.868	1.77066	2.92992	1.66179	4.36201		93.7893	2.60005	1.14392	7.97498
		9.08383	12.503	1.12327			5.1106	2.12507	12.3593	6.54791	57.7063	5.27904		12.7859		8.08675	8.27237	3.49892	1.5027	6.30099		5.05893	8.69699	4.74774	4.89864	2.10603			11.8435	4.81784	51.3993	5.67346	8.69014	7.92789		3.8326	3.48238	1.09854	2.54281	17.5388	6.10596	4.81434	4.07493	4.08363		25.2954	4.49044	2.07424	1.85968
		5.56817	8.07054	13.4775			6.38182	5.82194	4.85698	2.85855	7.55757	1.55102		107.215		9.55742	4.1241	2.8212	4.38836	4.2896		4.54946	1.9376	3.25113	17.7397	1.57978			11.0215	2.62809	14.0718	2.24488	23.5079	9.25505		1.69575	1.1239	9.39204	4.25712	21.7004	12.2554	1.34786	1.21665	7.46705		28.9563	4.79622	3.40869	2.32723
		14.4733	8.64736	3.80889			4.83057	1.82305	3.81286	10.8911	8.08955	5.64251		7.64219		5.23861	3.16395	2.78128	1.19781	5.54746		2.67306	1.7173	4.76289	17.4484	5.71896			11.0351	3.24719	5.96989	5.78287	11.9193	11.2579		3.71051	5.33911	10.2701	15.4828	2.24047	6.02049	2.28798	1.01125	5.91347		19.8097	1.39901	1.02633	4.8269
		35.109	35.5543	13.8437			1.23059	3.08711	10.0893	2.24114	14.8766	1.26337		8.21188		1.59529	1.72285	1.27779	4.3914	7.68114		1.67203	2.44784	4.45154	3.84455	6.34725			6.44956	1.96368	19.427	6.75498	23.0082	8.48993		4.01151	22.5441	7.36566	7.67059	1.45898	10.7931	1.67615	1.05976	1.5956		37.8001	11.5045	2.83264	19.2326
		9.61619	38.2895	37.2051			4.22677	4.71019	8.59793	7.02984	7.17537	1.16584		6.51765		3.41502	6.81711	2.08564	4.03448	11.1978		1.41319	1.35821	6.58288	7.36138	1.30031			14.9352	10.7281	1.55008	5.47994	9.42526	25.7794		2.42266	27.9456	6.69087	13.8923	4.03761	5.04203	1.60506	4.83919	1.02992		3.45206	3.38617	2.33138	2.64618
		11.7492	14.8191	7.71477			3.69359	2.39239	5.48661	5.13576	2.60214	5.19065		7.81492		1.7519	9.02328	2.7555	2.69824	3.32521		2.24297	9.75865	4.51078	5.70503	12.5286			28.0847	5.49407	22.8067	1.76018	9.93318	14.3184		2.26794	7.40176	27.3101	11.9106	16.621	6.0535	1.12705	3.53433	1.3605		8.11183	1.15553	4.75766	1.63537
		13.0329	67.6792	5.5311			2.15895	4.72521	6.27584	4.70536	4.98501	2.67114		17.404		3.43487	7.80909	1.60062	5.29696	1.19815		2.426	8.86543	2.00707	4.32221	3.59332			4.91893	5.32957	8.63736	1.50834	4.65576	2.98109		3.49221	29.725	20.9611	10.3168	2.44736	12.2439	1.18811	4.48352	1.742		65.5569	4.93939	2.09248	8.12709
		2.4037	7.07134	4.74033			3.55467	6.49697	7.10424	3.59661	3.67267	7.52004		2.72067		3.16246	1.17764	1.51826	2.89122	11.0758		1.91055	4.05533	3.67695	9.73194	1.00175			9.12142	3.71508	19.463	2.56364	26.4366	51.8313		1.65918	10.7072	7.24114	11.0136	23.6572	44.5395	1.74599	7.28289	5.79422		54.8281	4.58456	2.8438	4.55142
		17.0186	2.67708	9.02489			3.7881	2.89957	4.12387	12.6454	2.50682	1.40624		15.9922		5.68582	13.346	3.5621	4.00088	3.7976		2.42276	6.42183	4.39007	14.5095	2.45938			9.04565	5.58075	4.12983	3.17086	21.6202	23.9217		3.55185	9.37401	4.45	16.0037	23.3087	4.55458	1.53229	4.23276	5.14453		48.3288	7.39009	1.67532	11.3474
		14.6268	23.9941	5.65792			4.28207	2.44886	4.04261	5.61042	6.28373	2.61171		1.4737		6.06245	5.50037	1.31111	2.75684	9.22917		7.42655	3.93637	10.2616	3.74274	1.48478			17.5766	7.47646	5.0515	2.60975	13.5661	17.7328		1.47689	20.2751	36.9966	3.03675	37.3995	12.8787	20.6646	7.07623	1.15172		7.99253	1.37824	1.21128	12.696
		21.8606	13.8354	8.25011			9.25402	7.93354	1.88889	5.88018	3.67784	1.91373		44.99		12.1001	10.4844	4.2549	1.88766	23.988		5.83084	5.98716	6.32409	10.6883	4.61367			9.44579	4.11009	8.27406	3.09354	35.0534	8.51996		3.32342	25.3304	17.5092	18.6664	18.3011	12.0909	7.52052	2.99815	4.00936		10.2314	3.01984	2.00428	5.00004
		20.7438	14.4355	7.94887			3.82406	1.70286	5.22471	6.54943	4.5244	2.10994		2.67697		1.9653	6.5507	1.07756	1.19403	2.61399		3.37427	7.58534	2.74335	1.71055	5.16807			13.1287	6.21315	2.94044	5.75077	8.59455	41.2369		1.34242	12.2246	12.758	10.0027	15.6373	4.30255	1.65148	10.1472	1.24592		9.2241	1.46706	2.15016	45.5507
		2.06196	9.97981	6.24655			8.70435	1.31328	2.83071	1.29849	2.83785	4.31932		3.12671		1.53905	9.67222	1.17909	1.8283	4.6895		4.1682	6.83514	4.38294	6.34782	3.38976			22.8123	5.64035	3.09033	1.68422	7.73261	45.3964		7.51104	10.7488	14.1766	12.0943	40.1462	3.22863	1.27008	1.74559	13.2931		33.013	4.35257	1.28905	34.4515
		1.94618	5.33811	4.64442			4.64804	1.00866	8.71953	5.48736	4.41828	17.1641		10.6741		2.65625	1.56842	1.2759	1.18746	4.32794		1.21121	3.80792	4.8052	22.5947	5.77425			7.92167	4.63659	2.25311	6.58362	2.864	15.4267		8.86865	8.15875	3.71938	11.8559	2.26082	2.23968	1.07394	5.57542	1.28666		17.373	1.52848	1.19416	40.4504
		1.39983	7.22025	11.4547			4.09811	7.02901	2.80557	7.39902	5.28645	10.3843		13.5267		2.74779	21.8848	1.20078	1.97278	4.40373		1.6191	1.01218	4.94106	7.80257	2.42118			21.5489	4.0825	17.8652	2.36515	16.1312	14.2784		6.87471	6.43642	14.9269	12.3255	21.1784	16.1263	1.75394	3.89316	13.3411		9.64551	1.20149	6.39242	17.0547
		4.61222	9.72461	6.62169			8.18064	1.3599	8.20624	4.09976	1.92883	4.76927		1.8616		7.53422	3.18222	1.24258	1.10562	1.11751		3.91739	8.2125	7.10669	5.03084	1.68181			18.0471	4.68436	85.2052	2.09115	86.433	2.1409		1.89886	5.76498	4.46085	7.00739	94.5498	42.7947	5.60014	2.62515	3.45727		10.6579	1.74854	4.76473	18.4454
		1.15918	2.26412	12.8068			1.0835	1.60235	1.6264	3.95578	1.4208	8.49804		3.3827		5.72993	3.55237	1.41673	4.88371	3.51822		6.25221	2.08316	5.2818	3.17745	21.7756			2.91486	2.76255	2.71198	1.12628	1.67322	8.48921		11.0117	6.92223	33.9556	3.75264	12.0564	10.8281	1.07478	6.3252	2.0242		17.5999	5.64067	1.30803	16.6019
		44.5373	7.69134	11.4377			4.66141	2.32401	17.7647	4.73961	12.5623	10.2399		2.88844		2.97994	26.9254	1.04361	2.94326	5.43377		7.01866	2.40022	4.40121	1.8772	4.04821			25.8688	5.01288	10.6889	2.00434	9.91343	12.6437		2.29438	9.29377	17.4088	2.63238	76.3396	12.2539	2.0977	2.60625	5.53282		93.0812	7.62473	5.5261	8.06821
		33.0183	2.48112	6.83412			6.73767	2.17636	9.81101	18.7384	13.9718	3.75888		9.19174		3.24628	5.16264	3.66426	9.2112	7.50509		7.5254	4.54032	1.64939	10.005	2.20053			26.2087	3.13588	13.3832	2.43794	6.83434	16.8132		11.6058	21.1331	16.0793	15.7653	4.14509	8.56185	3.34352	1.28848	4.33103		65.0712	4.00127	2.69086	68.605
		6.77772	8.93522	3.15951			3.07667	2.97055	4.28815	2.72489	9.55636	3.27578		1.14144		2.45167	5.96188	5.74927	3.56818	1.7937		10.3257	2.17907	1.27257	11.5711	2.90271			4.78376	2.8645	16.8682	3.9915	7.86485	4.30682		8.09391	5.9042	11.1915	12.3123	4.47634	7.05116	6.562	5.49446	2.92936		48.8182	7.34193	3.08606	7.88735
		1.35261	19.7819	4.51618			5.28625	1.83133	1.72344	6.00869	27.5056	7.59814		6.55269		10.5704	4.59386	7.03147	2.30975	1.19419		1.24791	6.6267	3.57272	1.50034	3.06858			11.0919	4.50312	23.9588	4.60143	34.3323	29.6229		8.23344	5.18007	4.27206	16.7157	17.4789	5.22984	2.90399	4.1099	1.52685		35.101	1.76489	1.59941	3.25812
		66.1794	33.4862	3.36697			4.72645	1.71633	10.4921	6.81404	37.2038	1.9583		6.36719		4.04641	5.02295	1.42648	1.28269	4.13999		8.35399	6.22305	7.12095	5.06782	7.88682			4.71965	6.01811	5.5287	1.94556	23.983	4.02222		1.26534	38.5706	3.46794	11.1545	17.1899	1.53499	1.01079	1.77394	3.00447		6.62881	1.44762	1.78361	8.36963
		23.6508	5.42943	5.26538			5.5829	4.67496	4.84237	8.4232	8.3168	1.01001		6.80002		3.90524	31.4904	4.77922	1.55271	27.1175		1.56549	2.26059	3.81993	6.80471	2.27743			6.48363	9.63764	3.59241	1.59334	10.408	9.93722		3.04211	21.6571	27.7283	4.36381	7.03694	12.1482	7.8693	1.17727	3.72249		34.238	4.52358	3.38004	12.3946
		10.0776	3.6021	2.22026			7.38328	5.67584	15.5899	15.7995	5.23339	3.60952		19.2463		5.91852	6.01257	2.06961	2.77882	9.79498		9.70299	5.82041	1.54606	7.27831	7.32085			13.414	18.4193	12.7796	1.12402	9.00624	2.53418		1.70757	16.2257	6.54225	2.46115	4.01381	5.82245	2.51381	9.47456	2.60515		13.204	2.81967	1.03452	61.1396
		63.527	2.02718	5.7652			1.2437	1.64691	1.83511	5.11757	14.2451	4.67326		48.1352		1.75631	21.9508	4.1166	3.12563	6.06986		4.09445	3.72438	8.49463	2.51846	1.31238			9.75559	4.25981	9.55641	1.60419	6.04984	8.60434		2.51099	3.56118	6.33781	13.5498	19.0749	19.4166	3.71656	5.34198	1.96521		2.10449	1.76843	2.60155	19.0931
		35.6907	8.20948	13.8484			1.0465	2.40016	10.2834	7.30718	6.52977	13.3778		2.32947		2.45884	15.6264	3.2223	3.17312	7.51302		15.6711	1.51988	7.10625	1.3651	4.22162			17.1843	3.5954	19.9939	2.4922	10.9595	1.09547		6.19675	5.24001	3.12613	3.22972	36.8751	2.66699	2.06383	5.37034	1.07788		4.78348	5.67116	1.87032	3.40954
		80.3749	7.2518	5.04762			8.07938	5.17022	6.51437	1.55976	8.0872	5.45277		4.09007		1.50651	1.5419	1.5519	3.20874	23.5759		4.91979	1.0237	5.79894	5.92436	2.76499			21.3332	1.39876	19.4061	1.92521	12.346	8.45418		6.80494	13.6791	7.69783	7.50792	56.7761	7.15914	1.30312	4.06863	1.33037		12.5363	3.24874	1.44535	25.7355
		43.5258	1.96684	1.61315			11.012	1.76969	4.74006	3.54326	13.5572	3.88308		7.48349		5.45367	2.14958	3.05538	4.04054	6.35651		7.71287	8.91694	4.80698	5.23092	6.10247			7.16196	11.2965	14.4266	7.47569	6.75787	2.42048		11.0769	10.3563	7.25882	1.24342	48.4709	17.3294	3.90057	5.92322	2.2088		1.88755	8.06838	2.38906	8.36332
		37.4847	1.26159	3.5048			5.99547	9.81202	11.8449	1.33698	6.22175	1.08278		9.01077		7.85349	12.0552	6.52884	2.71718	1.56853		3.98056	1.08386	4.08318	3.02651	7.21078			10.548	10.2144	18.4157	4.1823	3.4809	26.9435		6.16974	4.21521	1.43513	1.44626	7.22732	29.7258	7.5017	3.44518	3.04054		6.46142	1.90585	2.78277	10.3373
		28.7622	19.6308	43.4143			4.80006	8.59148	6.12443	5.43795	4.2995	2.62999		24.9189		9.61367	3.4227	4.7591	1.06217	31.265		4.43694	4.96549	1.64494	3.51835	4.31461			4.6385	2.54288	4.19856	1.52326	1.14649	15.6713		13.4529	5.35506	10.2359	1.80717	3.95125	20.8219	5.92508	5.07547	1.44071		12.1516	2.46086	1.03973	4.08738
		20.5836	33.2813	1.33428			3.35215	1.5521	5.4416	4.67474	21.4533	4.14558		3.4536		13.7433	8.34604	4.11597	3.1514	4.93142		5.66693	1.93489	1.72868	9.84895	8.25424			6.64369	4.56862	5.17129	1.36592	15.26	10.0245		5.35562	20.4965	11.7827	2.18916	31.1479	28.1962	11.0702	2.54545	1.64907		11.1696	7.42279	2.49475	1.89683
		39.4676	3.07177	17.5688			4.33011	3.90616	5.21535	2.39511	35.2378	8.64701		29.1495		8.86427	22.1948	1.05147	3.84857	1.89814		5.65174	2.31447	1.89928	3.44592	1.37319			15.9729	2.01539	14.583	5.73721	19.2593	2.41047		3.87029	9.9333	2.01915	3.4431	1.06132	13.2543	9.43839	5.80665	1.08933		6.4416	1.16879	1.12197	7.87333
		10.8418	7.62325	36.5308			6.13737	3.57719	5.04932	2.92706	7.50357	4.48809		2.35297		4.29345	1.19709	1.02569	3.14786	1.47092		1.27711	2.781	6.63856	1.57834	2.33925			35.0806	2.84332	15.6762	1.33607	11.2275	19.1894		3.61261	5.7732	5.3935	1.5411	43.5985	16.6403	9.21214	9.40809	4.794		27.7883	1.94297	1.03824	7.62309
		51.2136	7.75887	8.00073			2.5505	2.58097	3.43052	6.78615	6.77392	1.05192		63.0185		3.62456	4.69406	8.42462	1.64946	2.69		2.57062	7.0129	6.36239	2.73678	4.84187			20.2794	11.3733	1.13179	1.82393	15.3942	35.0731		1.00485	38.7234	3.53301	3.57087	18.8078	9.90417	1.19815	1.28501	2.14048		11.3161	1.7618	3.00531	1.34166
		18.274	19.7155	7.97125			3.31152	8.58163	1.46095	4.69596	8.31586	6.03111		2.01494		1.81642	5.41019	7.39861	2.19532	5.29959		7.61163	3.63117	11.7515	1.69434	2.49407			12.2441	7.37402	4.63059	1.49116	10.8343	12.101		2.14585	14.0538	8.15051	3.07825	2.27694	3.72606	1.55027	1.81048	4.66076		13.3329	1.51081	1.41036	5.13393
		15.9987	11.7385	6.36663			5.57822	2.12767	1.94501	10.6834	9.29249	4.50638		22.0605		2.139	5.46737	3.15409	1.2544	7.97593		3.48252	1.74746	5.10943	5.70352	3.29426			1.33336	5.06607	41.1628	3.31916	7.71922	56.3319		4.52294	3.43114	4.45081	1.66689	5.49544	7.05321	7.07848	3.67106	3.86083		9.26411	1.20635	1.05387	5.60148
		16.6122	2.22979	8.28386			4.86653	1.04492	6.85753	3.1365	11.2917	1.91639		16.4877		1.59971	5.28819	10.8083	5.33863	2.8103		4.50865	10.8188	3.3077	8.46663	11.6576			9.38437	1.15792	13.6306	4.57792	32.7429	18.513		6.55908	6.71195	17.6124	2.28531	7.73322	20.0179	1.22282	1.19554	7.99666		7.45658	5.26992	1.45353	2.00408
		8.159	20.9477	1.46963			7.24657	1.22987	7.4708	2.73368	9.60848	3.41979		19.508		3.91296	12.2745	3.26819	4.69123	10.1347		1.68398	9.05777	4.00968	3.43781	6.41159			10.5079	1.31749	4.52913	1.56305	7.77084	22.1347		2.21111	18.6741	5.95422	2.49869	17.7123	3.25013	8.37156	3.70697	2.07852		7.71097	3.1555	2.26775	2.80389
		9.00023	9.70025	12.6412			10.8337	2.65142	3.31594	1.3482	4.24738	9.02153		8.70902		1.94931	3.65139	3.28579	1.06394	2.33087		7.07653	4.63589	5.83858	6.74038	5.51188			12.5998	3.9771	15.1205	1.94104	17.0884	17.5133		1.67324	23.4519	7.40984	2.66597	24.846	24.4655	2.25787	3.99995	3.90115		9.35294	1.01899	11.0537	2.89853
		24.1223	6.73144	8.70624			14.7994	1.03197	1.3224	6.03476	7.08053	1.06526		15.6863		5.66872	3.98146	2.92933	2.68081	4.90652		2.17605	14.1986	4.83995	9.78411	3.35055			16.9987	2.92508	5.07179	13.2563	16.9648	27.4548		3.62724	5.4266	2.88071	6.14859	1.46857	8.57464	4.01557	3.31728	5.6457		4.01517	3.22399	1.30915	1.36199
		3.16307	5.66028	9.21637			10.5228	1.4516	5.67194	1.2703	3.14633	5.19979		21.0316		4.83496	6.67625	4.42936	3.9107	2.5957		1.54756	4.19988	1.13894	2.30319	3.29979			7.83312	2.35179	1.4244	1.79274	29.8011			1.06955	15.0679	11.3333	3.17045	5.96987	4.65028	5.26014	1.81332	7.85704		11.0698	4.26729	6.78985	3.08078
		2.23755	23.8551	38.1152			6.75026	2.93791	1.64101	3.74695	19.4949	1.31633		61.8894		6.82783	4.95104	3.18363	1.56964	6.24811		6.62135	3.84876	4.44797	2.18618	5.50836			7.21957	3.81851	2.8357	7.56747	3.40252			1.96918	1.71025	10.6866	2.54479	40.4318	8.43775	1.6749	5.67151	2.10313		14.9616	2.12944	4.41605	32.1747
		9.82991	4.37765	4.8128			3.29035	1.99763	1.02074	3.29351	6.765	6.47421		21.1392		2.36013	8.96492	3.95156	2.50526	7.10849		4.70705	5.18799	6.72541	2.92318	4.88258			27.4051	2.95217	16.0415	2.13229	30.2147			2.60383	18.676	8.51561	4.19192	45.9583	35.2942	5.87908	4.32506	7.12926		62.8955	3.22709	5.57336	1.66551
		6.30691	12.7671	25.2189			1.12258	14.2021	3.55329	1.34517	1.68468	6.95007		7.71062		2.49523	3.79049	3.57216	2.4565	12.6099		9.82113	2.01928	3.86759	9.53692	4.21307			14.0361	8.34921	8.35458	5.08341	18.5303			2.34502	5.68328	5.63972	6.30467	1.90615	8.7558	5.10499	1.245	1.43646		2.77809	1.54395	1.82417	19.1632
		11.1969	5.7411	20.1159			5.89551	1.18014	1.84037	16.6864	3.37217	5.44553		12.5184		2.08882	6.77114	3.37035	2.51157	1.92303		7.35877	6.75431	3.25781	1.39903	6.27136			19.0817	9.02002	13.1763	4.18818	20.2902			8.37185	6.33007	4.07927	14.3289	6.62507	6.80066	7.85174	5.10351	4.49186		9.77802	1.81085	1.48256	10.3457
		7.80992	6.27308	3.78793			1.74352	6.55292	4.34837	1.34244	2.40118	2.45893		21.4595		4.80738	4.34572	2.35	3.0054	4.88427		7.03112	1.11284	4.52771	4.36577	8.0552			2.15785	2.61922	24.0275	3.08947	3.62015			3.86467	12.0921	9.94191	1.10511	21.1538	1.88068	6.92416	4.8666	5.01255		6.54438	1.96551	1.40627	13.615
		1.6884	2.56968	17.0864			2.08911	1.27753	6.22907	4.04005	2.73643	2.65437		10.6634		4.97998	9.86672	3.52249	5.38208	3.3543		1.65308	3.51984	2.32866	5.13975	2.77956			5.06464	8.11773	13.8348	2.80463	28.3953			1.69913	6.95751	4.19374	12.7977	5.52883	5.54047	10.693	8.63847	8.6281		35.4361	4.41885	1.53987	31.935
		2.57579	49.4523	25.6381			1.15101	3.79581	6.39101	8.47018	2.17909	4.81613		4.77519		5.68416	3.98559	2.48077	2.73184	1.74787		8.50816	9.38058	2.59502	2.14718	10.0949			4.94269	8.08226	10.9016	2.33395	6.05238			1.53934	10.9368	1.78819	3.93112	12.2138	3.96197	4.98162	4.17164	6.14687		11.5547	1.23684	1.40329	24.9484
		5.03336	6.89198	7.19896			8.0124	1.97691	6.99317	1.66827	10.7006	5.2638		9.32694		1.59971	3.74157	4.95934	6.23384	14.4913		1.19038	7.59753	1.46053	2.02358	4.48952			6.01982	2.40646	27.4072	7.83559	14.5574			1.7582	15.9221	1.15518	9.19522	54.1234	3.99728	4.6688	1.37795	10.0786		7.94554	1.01678	4.20877	40.5268
		7.73122	21.6818	7.27107			1.83816	4.16415	7.40766	3.57297	1.57199	10.7596		15.7889		7.93456	2.8162	4.87572	6.5026	8.61049		6.83819	2.82624	3.6186	3.08476	8.64328			8.2707	3.14327	13.7124	1.3311	11.3126			5.08556	11.3574	4.92035	16.6241	9.15535	8.09231	6.17057	2.76377	2.54956		7.98408	5.48601	1.20681	5.95407
		7.94004	11.4086	4.13784			7.23723	16.9089	2.86695	1.80497	22.8746	7.176		7.3792		3.75746	4.44769	3.8428	9.83208	2.14711		5.27304	4.75774	1.72645	1.81084	1.58531			6.81876	3.48163	3.16954	3.11344	8.49386			1.40712	4.45449	3.1205	17.7101	6.71643	3.13217	7.94458	3.51449	3.45387		2.72597	3.65439	2.28524	22.204
		14.0178	11.6599	21.5144			3.74694	1.32623	1.86083	8.06191	14.9001	6.16332		16.2671		3.28929	1.14051	1.85681	2.53203	10.9411		9.61044	1.67561	4.97803	1.48666	4.83935			4.94583	1.25691	15.125	1.85875	2.41279			14.9039	7.511	1.64882	4.04967	4.97994	1.30624	2.38542	1.06985	11.9907		5.8627	1.30135	1.44609	27.3983
		3.64088	11.0476	48.6364			10.2161	2.34007	5.2703	7.77851	2.86226	3.0868		5.23852		4.36238	2.2038	1.39001	3.05693	6.84234		2.80418	2.91419	2.69034	3.99854	4.9253			11.2537	1.52731	42.9734	1.18099	31.8019			6.22038	4.2737	7.15438	6.82496	22.1288	17.9566	3.72952	1.92263	5.22897		35.2283	2.29382	3.03508	7.9911
		14.5681	4.58414	3.96768			4.05709	4.09007	13.8384	6.27694	4.32767	5.50649		7.27902		1.55063	1.00082	3.69318	1.03994	17.7251		16.1019	1.53903	1.19863	5.30234	3.79086			8.09092	11.9417	23.3408	5.80548	6.9908			3.62443	6.40258	1.53836	8.561	40.6867	10.5825	1.18058	5.47461	1.22555		1.98152	2.48826	2.45716	17.096
		62.1845	3.08229	11.5208			4.29882	6.42029	3.90055	10.1078	5.75598	4.16959		11.3464		3.8115	4.07105	2.71118	2.29661	1.93802		6.45761	13.6598	9.55206	2.16845	10.0366			15.0236	21.0356	25.8087	3.19528	9.35357			5.82429	20.4447	17.1011	16.0729	1.23366	12.8498	7.16505	2.00801	4.37219		32.0608	1.84443	1.36199	40.4055
[truncated: 3,747 more rows]
[truncated: 58 more columns]
