# Supplementary material for: Compartmentalized oskar degradation in the germ plasm safeguards germline development
Source: eLife journal article supplement (doi:10.7554/elife.49988), 2020-01-07
Supplement: supp [file elife-49988-supp-v1.zip › elife_poa_e49988_Figure_4_figure_supplement_1_source_data_1.xlsx]

## Sheet: Sheet1
Figure 4 - supplement 1
			% of cyclin B particles colocalized with DCP1					% of oskar particles colocalized with DCP1				TTESTS
		Sample	nc1-5	nc6-10	nc11-12		Sample	nc1-5	nc6-10	nc11-12		Array 1	Array 2
		1	4.9445	7.85498	8.78525		1	9.67742	16.973	28.6252		cycB 1-5	cycB 6-10	0.0780985	n.s.
		2	10	9.67742	11.6846		2	13.909	25.5599	29.3937		cycB 1-5	cycB 11-12	0.00380127	*
		3	6.52174	7.30117	13.1436		3	14.8796	25.6164	30.8155		osk 1-5	osk 6-10	3.84053e-07	***
		4	8.4507	12.6415	12.6016		4	16.2117	26.7464	32.0807		osk 1-5	osk 11-12	1.02162e-06	***
		5	8.2397	10.2784	9.78044		5	17.7794	27.2895	32.5501
		6	5.27778	7.73131	28.6455		6	18.7135	27.6441	33.2888
		7	6.74157				7	19.1902	28.0969	36.3708
							8	19.9626	28.6732	36.7021
			Remove outliers based on interquartile range				9	20.7801	28.8219	39.8222
		Max	10	12.6415	28.6455		10	22.1599	28.9895	40.0791
		Min	4.9445	7.30117	8.78525		11	22.4026	29.2707	40.5309
							12	22.8166	29.596	42.9412
		Q1	5.89976	7.76223	10.2565		13	23.1441	30.5795	43.3735
		Q3	8.3452	10.1281	13.0081		14	23.9808	30.8162	44.5415
		IQR	2.44544	2.36591	2.75165		15	24.1167	30.8241	45.4545
							16	25.0703	30.9297	56.5996
		High outlier?	FALSE	FALSE	TRUE		17	25.2591	31.2803	72.1662
		Low outlier?	FALSE	FALSE	FALSE		18	25.9324	31.645
							19	27.0734	32.153
		Above	12.0134	13.677	17.1356		20	27.2118	32.2892
		Below	2.23159	4.21336	6.129		21	27.3301	33.641
							22	28.4962	33.8279
			Data Minus Outliers				23	28.8082	35.8065
			nc1-5	nc6-10	nc11-12		24	30.1829	36.4842
			4.9445	7.85498	8.78525		25	30.2632	36.5975
			10	9.67742	11.6846		26	30.6586	36.9231
			6.52174	7.30117	13.1436		27	32.345	37.9373
			8.4507	12.6415	12.6016		28	35.6098	38.3306
			8.2397	10.2784	9.78044		29	35.6195	38.4358
			5.27778	7.73131			30	35.8454	39.1125
			6.74157				31	37.7434	39.3848
							32	42.7928	39.6913
		Avg	7.168	9.24746	11.1991		33		40.4072
		StDev	1.82257	2.03926	1.85898		34		40.7035
							35		40.7179
							36		41.1262
							37		42.5633
							38		42.8667
							39		43.5938
							40		43.8918
							41		47.9416
							42		49.2345
							43		49.534
							44		67.7686
								Remove outliers based on interquartile range
							Max	42.7928	67.7686	72.1662
							Min	9.67742	16.973	28.6252
							Q1	20.5757	29.5147	32.5501
							Q3	30.203	40.4813	43.3735
							IQR	9.6273	10.9666	10.8234
							High outlier?	FALSE	TRUE	TRUE
							Low outlier?	FALSE	FALSE	FALSE
							Above	44.6439	56.9312	59.6086
							Below	6.13473	13.0648	16.315
							Data minus outliers
							Sample	nc1-5	nc6-10	nc11-12
							1	9.67742	16.973	28.6252
							2	13.909	25.5599	29.3937
							3	14.8796	25.6164	30.8155
							4	16.2117	26.7464	32.0807
							5	17.7794	27.2895	32.5501
							6	18.7135	27.6441	33.2888
							7	19.1902	28.0969	36.3708
							8	19.9626	28.6732	36.7021
							9	20.7801	28.8219	39.8222
							10	22.1599	28.9895	40.0791
							11	22.4026	29.2707	40.5309
							12	22.8166	29.596	42.9412
							13	23.1441	30.5795	43.3735
							14	23.9808	30.8162	44.5415
							15	24.1167	30.8241	45.4545
							16	25.0703	30.9297	56.5996
							17	25.2591	31.2803
							18	25.9324	31.645
							19	27.0734	32.153
							20	27.2118	32.2892
							21	27.3301	33.641
							22	28.4962	33.8279
							23	28.8082	35.8065
							24	30.1829	36.4842
							25	30.2632	36.5975
							26	30.6586	36.9231
							27	32.345	37.9373
							28	35.6098	38.3306
							29	35.6195	38.4358
							30	35.8454	39.1125
							31	37.7434	39.3848
							32	42.7928	39.6913
							33		40.4072
							34		40.7035
							35		40.7179
							36		41.1262
							37		42.5633
							38		42.8667
							39		43.5938
							40		43.8918
							41		47.9416
							42		49.2345
							43		49.534
							44
							Avg	25.4989	34.943	38.3231
							StDev	7.46537	7.08221	7.3703
