# Supplementary material for: Compartmentalized oskar degradation in the germ plasm safeguards germline development
Source: eLife journal article supplement (doi:10.7554/elife.49988), 2020-01-07
Supplement: supp [file elife-49988-supp-v1.zip › elife_poa_e49988_Figure_4_source_data_1.xlsx]

## Sheet: Sheet1
Figure 4C
		% oskar coloc with DCP1									% oskar coloc with Pacman
		Sample	nc3	nc4	nc5	nc6	nc7	nc8	nc9		Sample	nc3	nc4	nc5	nc6	nc7	nc8	nc9
		1	17.8886	27.266	43.4783	50.7147	44.3989	54.7857	51.9231		1	18.5484	20.0762	35.4705	43.4526	50.2695	59.6971	67.5456
		2	35.7039	22.7483	58.6657	52.5714	25.3052	44.5733	44.8311		2	27.7907	18.702	13.5082	48.3908	42.1535	51.462	49.3229
		3	25.2355	17.5508	39.9707	45.9103	43.1333	46.3284	31.407		3	22.7367	11.0448	32.716	39.58	45.5854	60.0858	48.8201
		4	30.2892	20.339	33.1565	42.0814	56.9381	60.5396	65.8892		4	27.4155	18.6424	18.6933	42.8571	59.298	43.3369	43.0108
		5	31.9463	38.646	47.858	52.9061	41.5809	65.8343	65.356		5	19.8227	17.6823	16.4157	49.9607	57.2072	36.5604	43.4447
		6		19.6941	34.528	39.6383			54.8807		6		15.272	25.2188	44.4838			37.7236
		7		27.924	40.9756						7		21.8902	21.0769
		Remove outliers based on interquartile range
		Max	35.7039	38.646	58.6657	52.9061	56.9381	65.8343	65.8892
		Min	17.8886	17.5508	33.1565	39.6383	25.3052	44.5733	31.407
		Q1	25.2355	20.0165	37.2493	43.0387	41.5809	46.3284	46.6041		Q1	19.8227	16.4771	17.5545	43.006	45.5854	43.3369	43.1192
		Q3	31.9463	27.595	45.6681	52.1072	44.3989	60.5396	62.7372		Q3	27.4155	19.3891	28.9674	47.414	57.2072	59.6971	49.1972
		IQR	6.71078	7.57847	8.41879	9.06859	2.81797	14.2112	16.1331		IQR	7.59279	2.91196	11.4129	4.40803	11.6218	16.3602	6.07796
		High outlier?	FALSE	FALSE	TRUE	FALSE	TRUE	FALSE	FALSE		High outlier?	FALSE	FALSE	FALSE	FALSE	FALSE	FALSE	TRUE
		Low outlier?	FALSE	FALSE	FALSE	FALSE	TRUE	FALSE	FALSE		Low outlier?	FALSE	TRUE	FALSE	FALSE	FALSE	FALSE	FALSE
		High outliers above	42.0125	38.9627	58.2963	65.7101	48.6259	81.8564	86.9368		High outliers above	38.8046	23.757	46.0868	54.0261	74.6399	84.2374	58.3141
		Low outliers below	15.1694	8.64882	24.6212	29.4358	37.354	25.0117	22.4044		Low outliers below	8.43349	12.1092	0.435066	36.394	28.1527	18.7967	34.0023
		Data minus outliers
		% oskar coloc with DCP1									% oskar coloc with Pacman
			nc3	nc4	nc5	nc6	nc7	nc8	nc9			nc3	nc4	nc5	nc6	nc7	nc8	nc9
			17.8886	27.266	43.4783	50.7147	44.3989	54.7857	51.9231			18.5484	20.0762	35.4705	43.4526	50.2695	59.6971
			35.7039	22.7483		52.5714		44.5733	44.8311			27.7907	18.702	13.5082	48.3908	42.1535	51.462	49.3229
			25.2355	17.5508	39.9707	45.9103	43.1333	46.3284	31.407			22.7367		32.716	39.58	45.5854	60.0858	48.8201
			30.2892	20.339	33.1565	42.0814		60.5396	65.8892			27.4155	18.6424	18.6933	42.8571	59.298	43.3369	43.0108
			31.9463	38.646	47.858	52.9061	41.5809	65.8343	65.356			19.8227	17.6823	16.4157	49.9607	57.2072	36.5604	43.4447
				19.6941	34.528	39.6383			54.8807				15.272	25.2188	44.4838			37.7236
				27.924	40.9756								21.8902	21.0769
		Avg	28.2127	24.8812	39.9945	47.3037	43.0377	54.4123	52.3812		Avg	23.2628	18.7109	23.2999	44.7875	50.9027	50.2285	44.4644
		StDev	6.88878	7.1907	5.50592	5.63457	1.41141	9.08707	13.0705		StDev	4.2451	2.22986	8.26542	3.80696	7.33913	10.2793	4.77411
		Student's 2 tailed t-test
		array 1	array 2	p-value
		dcp1 nc3	dcp1 nc4	0.439762
		dcp1 nc3	dcp1 nc5	0.0115664	*	Asterisks indicate significantly higher than nc3
		dcp1 nc3	dcp1 nc6	0.000675431	***
		dcp1 nc3	dcp1 nc7	0.0117586	*
		dcp1 nc3	dcp1 nc8	0.000887788	***
		dcp1 nc3	dcp1 nc9	0.00487655	**
		pcm nc3	pcm nc4	0.0477407
		pcm nc3	pcm nc5	0.992891
		pcm nc3	pcm nc6	9.61699e-06	***
		pcm nc3	pcm nc7	8.47312e-05	***
		pcm nc3	pcm nc8	0.000629497	***
		pcm nc3	pcm nc9	7.46902e-05	***
		dcp1 nc3	pcm nc3	0.00148536	***
