# Supplementary material for: Compartmentalized oskar degradation in the germ plasm safeguards germline development
Source: eLife journal article supplement (doi:10.7554/elife.49988), 2020-01-07
Supplement: supp [file elife-49988-supp-v1.zip › elife_poa_e49988_Figure_4_source_data_2.xlsx]

## Sheet: Sheet1
Figure 4F,G														Figure 4I
			% of DCP1 colocalized oskar colocalized with Pcm		% of DCP1 colocalized oskar not colocalized with Pcm			% of DCP1 colocalized oskar colocalized with Me31B		% of DCP1 colocalized oskar not colocalized with Me31B
		Sample					Sample							sample	% osk with Dcp1	% Dcp1 with Osk
		1	0.487273		0.512727		1	0.817073		0.182927				osk-sfGFP 1	35.5839	59.4512				avg colocalization with Dcp1		sd
		2	0.390879		0.609121		2	0.762295		0.237705				osk-sfGFP 2	50	44.3128				osk-sfgfp	40.5409	9.74508	3.4557
		3	0.401596		0.598404		3	0.738562		0.261438				osk-sfGFP 3	53.7275	52.25				oskΔi-sfgfp-nos3'UTR	3.64133	2.8633	1.01535
		4	0.456311		0.543689		4	0.770732		0.229268				osk-sfGFP 4	26.7368	31.4356
		5	0.514825		0.485175		5	0.736735		0.263265				osk-sfGFP 5	32.1267	41.7647				p=4.64*10^-7
		6	0.561863		0.438137									osk-sfGFP 6	45.0704	33.1606				t=8.767
		7	0.613112		0.386888															df=14
		Remove outliers based on interquartile range												osk-sfGFP 7	27.7533	38.6503
		Max	0.613112		0.609121		Max	0.817073		0.263265				osk-sfGFP 8	30.0275	25
		Min	0.390879		0.386888		Min	0.736735		0.182927				oskΔi-sfGFP-nos3'UTR 1	4.87805	8.63787
														oskΔi-sfGFP-nos3'UTR 2	2.84974	7.85714
		Q1	0.428953		0.461656		Q1	0.428953		0.461656				oskΔi-sfGFP-nos3'UTR 3	3.28947	6.99301
		Q3	0.538344		0.571047		Q3	0.538344		0.571047				oskΔi-sfGFP-nos3'UTR 4	10.687	6.06061
		IQR	0.109391		0.109391		IQR	0.109391		0.109391				oskΔi-sfGFP-nos3'UTR 5	2.01249	4.81728
														oskΔi-sfGFP-nos3'UTR 6	1.09689	3.22581				avg DCP1 colocalization with oskar		StDev
		High Outlier?	FALSE		FALSE		High Outlier?	FALSE		FALSE				oskΔi-sfGFP-nos3'UTR 7	2.42424	7.5				osk-sfgfp	43.7292	9.88949
		Low Outlier?	FALSE		FALSE		Low Outlier?	FALSE		FALSE				oskΔi-sfGFP-nos3'UTR 8	1.89274	4.97238				oskΔi-sfgfp-nos3'UTR	6.25801	1.70534
		Avg	0.468791	Avg	0.531209		Avg	0.765079	Avg	0.234921										p=6.439*10^-7
		StDev	0.0535476	StDev	0.0535476		StDev	0.0325946	StDev	0.0325946										t=8.530
																				df=14
