# Supplementary material for: Compartmentalized oskar degradation in the germ plasm safeguards germline development
Source: eLife journal article supplement (doi:10.7554/elife.49988), 2020-01-07
Supplement: supp [file elife-49988-supp-v1.zip › elife_poa_e49988_Figure_5_source_data_1.xlsx]

## Sheet: Sheet1
Figure 5A
	Total localized oskar intensity
	Sample	nc2	nc3	nc4	nc5	nc6	nc7	nc8	nc9	nc10	nc11	nc12
	1	0.834908	0.710945	0.722853	0.476023	0.560056	0.109785	0.373994	0.0171284	0.125183	0.200253	0.00363352
	2	0.949062	0.985651	0.692205	0.658984	0.646816	0.495591	0.167619	0.125642	0.186095	0.0203915	0.00483725
	3	1.06262	0.99367	0.978084	0.707903	0.708796	0.565524	0.0323483	0.103852	0.150317	0.00367081	0.0075378
	4	1.15341	1.02922	0.812302	0.729831	0.787997	0.630333	0.46629	0.251631	0.0322493	0.00289817	0.0128251
	5	1.51132	1.03903	0.979584	0.734459	0.940508	0.830247	0.486593	0.281932	0.100759	0.0994552	0.0129176
	6		1.06277	1.04476	0.739537	1.06206	0.955894	0.459494	0.251595	0.0431315	0.200655	0.018591
	7		1.08102	0.945283	0.833472			0.574416	0.334887	0.081336	0.139498	0.0259893
	8		1.09927	0.786115	0.841613			0.306225	0.504294	0.120581		0.033385
	9		1.13282	0.65065	0.858782					0.156987		0.123484
	10		1.16837		0.991263							0.183002
	11		1.17639		1.07151
	12		1.49309		1.36048
	13				1.57691
	Remove outliers based on interquartile range
	Max	1.51132	1.49309	1.04476	1.57691	1.06206	0.955894	0.574416	0.504294	0.186095	0.200655	0.183002
	Min	0.834908	0.710945	0.65065	0.476023	0.560056	0.109785	0.0323483	0.0171284	0.0322493	0.00289817	0.00363352
	Q1	0.949062	1.02033	0.722853	0.729831	0.662311	0.513074	0.271573	0.120194	0.081336	0.0120311	0.00885962
	Q3	1.15341	1.14171	0.978084	0.991263	0.90238	0.780269	0.471366	0.295171	0.150317	0.169876	0.0315361
	IQR	0.204352	0.121374	0.255231	0.261431	0.240069	0.267195	0.199792	0.174977	0.0689814	0.157844	0.0226765
	High Outlier?	TRUE	TRUE	FALSE	TRUE	FALSE	FALSE	FALSE	FALSE	FALSE	FALSE	TRUE
	Low Outlier?	FALSE	TRUE	FALSE	FALSE	FALSE	TRUE	FALSE	FALSE	FALSE	FALSE	FALSE
	Above	1.45994	1.32377	1.36093	1.38341	1.26248	1.18106	0.771054	0.557636	0.25379	0.406642	0.0655508
	Below	0.642533	0.838272	0.340006	0.337684	0.302208	0.112282	-0.0281156	-0.142271	-0.0221361	-0.224735	-0.0251551
	Data minus outliers
	Sample	nc2	nc3	nc4	nc5	nc6	nc7	nc8	nc9	nc10	nc11	nc12
	1	0.834908		0.722853	0.476023	0.560056		0.373994	0.0171284	0.125183	0.200253	0.00363352
	2	0.949062	0.985651	0.692205	0.658984	0.646816	0.495591	0.167619	0.125642	0.186095	0.0203915	0.00483725
	3	1.06262	0.99367	0.978084	0.707903	0.708796	0.565524	0.0323483	0.103852	0.150317	0.00367081	0.0075378
	4	1.15341	1.02922	0.812302	0.729831	0.787997	0.630333	0.46629	0.251631	0.0322493	0.00289817	0.0128251
	5		1.03903	0.979584	0.734459	0.940508	0.830247	0.486593	0.281932	0.100759	0.0994552	0.0129176
	6		1.06277	1.04476	0.739537	1.06206	0.955894	0.459494	0.251595	0.0431315	0.200655	0.018591
	7		1.08102	0.945283	0.833472			0.574416	0.334887	0.081336	0.139498	0.0259893
	8		1.09927	0.786115	0.841613			0.306225	0.504294	0.120581		0.033385
	9		1.13282	0.65065	0.858782					0.156987
	10		1.16837		0.991263
	11		1.17639		1.07151
	12				1.36048
	13
	Avg (normalized)	1	1.07682	0.845759	0.833655	0.784372	0.695518	0.358372	0.23387	0.110738	0.0952603	0.0149646
	StDev	0.138211	0.0675531	0.144202	0.226305	0.187857	0.191746	0.181513	0.152066	0.051702	0.0881579	0.0104805
		nc2	nc3	nc4	nc5	nc6	nc7	nc8	nc9	nc10	nc11	nc12
	Student's 2 tailed t-test
	array 1	array 2	p-value
	nc2	nc3	0.177072
	nc2	nc4	0.0993099
	nc2	nc5	0.192752
	nc2	nc6	0.0864274
	nc2	nc7	0.0326372	*
	nc2	nc8	0.000104861	***
	nc2	nc9	7.26299e-06	***
	nc2	nc10	2.23267e-09	***
	nc2	nc11	2.93142e-07	***
	nc2	nc12	1.26622e-09	***
Figure 5B
	Average number of oskar transcripts per particle
	Sample	nc2	nc3	nc4	nc5	nc6	nc7	nc8	nc9	nc10	nc11	nc12
	1	13.5834	17.6284	16.0334	9.50867	7.00113	20.1341	14.3258	7.63757	3.84419	5.54331	2.01467
	2	10.034	15.3264	17.9908	17.9208	11.7423	18.3377	17.4418	8.5818	4.49848	3.38392	4.08049
	3	15.1387	14.1564	12.5603	10.93	12.0455	11.7255	15.3021	8.68565	5.5315	2.60552	2.88379
	4	17.9386	13.0547	11.4463	12.1932	12.4345	14.107	12.214	11.1823	6.04704	4.76964	4.4075
	5		9.5855	8.88663	11.4033	15.3076	10.8183	11.3508	15.9895	6.39608	4.50892	3.22382
	6		11.0134	8.86272	15.779	15.6775	13.1971	21.4808		9.45785	1.91269
	7		13.1781	9.38814	10.4167
	8		10.7928
	9		15.9041
	10		13.6164
	11
	12
	13
	Remove outliers based on interquartile range
	Max	17.9386	17.6284	17.9908	17.9208	15.6775	20.1341	21.4808	15.9895	9.45785	5.54331	4.4075
	Min	10.034	9.5855	8.86272	9.50867	7.00113	10.8183	11.3508	7.63757	3.84419	1.91269	2.01467
	Q1	12.696	11.5238	9.13739	10.6734	11.8181	12.0934	12.7419	8.5818	4.75673	2.80012	2.88379
	Q3	15.8386	15.0339	14.2969	13.9861	14.5893	17.28	16.9069	11.1823	6.30882	4.70446	4.08049
	IQR	3.14261	3.51013	5.15951	3.31269	2.77124	5.18661	4.16494	2.60045	1.55209	1.90434	1.1967
	High Outlier?	FALSE	FALSE	FALSE	FALSE	FALSE	FALSE	FALSE	TRUE	TRUE	FALSE	FALSE
	Low Outlier?	FALSE	FALSE	FALSE	FALSE	TRUE	FALSE	FALSE	FALSE	FALSE	FALSE	FALSE
	Above	20.5525	20.2991	22.0362	18.9551	18.7462	25.0599	23.1543	15.0829	8.63696	7.56097	5.87555
	Below	7.98212	6.25858	1.39812	5.70433	7.66123	4.31351	6.4945	4.68112	2.4286	-0.0563904	1.08873
	Data minus outliers
	Sample	nc2	nc3	nc4	nc5	nc6	nc7	nc8	nc9	nc10	nc11	nc12
	1	13.5834	17.6284	16.0334	9.50867		20.1341	14.3258	7.63757	3.84419	5.54331	2.01467
	2	10.034	15.3264	17.9908	17.9208	11.7423	18.3377	17.4418	8.5818	4.49848	3.38392	4.08049
	3	15.1387	14.1564	12.5603	10.93	12.0455	11.7255	15.3021	8.68565	5.5315	2.60552	2.88379
	4	17.9386	13.0547	11.4463	12.1932	12.4345	14.107	12.214	11.1823	6.04704	4.76964	4.4075
	5		9.5855	8.88663	11.4033	15.3076	10.8183	11.3508		6.39608	4.50892	3.22382
	6		11.0134	8.86272	15.779	15.6775	13.1971	21.4808			1.91269
	7		13.1781	9.38814	10.4167
	8		10.7928
	9		15.9041
	10		13.6164
	11
	12
	13
	Avg	14.1737	13.4256	12.1669	12.5931	13.4415	14.72	15.3525	9.02182	5.26346	3.78733	3.32205
	SEM	1.64801	0.786592	1.37096	1.16625	0.846532	1.5197	1.51485	0.757752	0.477923	0.566944	0.428044
	Student's 2 tailed t-test
	array 1	array 2	p-value
	nc2	nc3	4.73096e-07
	nc2	nc4	0.000199173
	nc2	nc5	4.38362e-05
	nc2	nc6	3.83577e-06
	nc2	nc7	9.07115e-05
	nc2	nc8	6.44541e-05
	nc2	nc9	4.28197e-05	*
	nc2	nc10	0.000105501	***
	nc2	nc11	0.0044091	***
	nc2	nc12	0.00209017	***
