# Supplementary material for: Compartmentalized oskar degradation in the germ plasm safeguards germline development
Source: eLife journal article supplement (doi:10.7554/elife.49988), 2020-01-07
Supplement: supp [file elife-49988-supp-v1.zip › elife_poa_e49988_Figure_5_source_data_2.xlsx]

## Sheet: Sheet1
Figure 5C
	Average Staufen intensity
	Sample		nc3	nc4	nc5	nc6	nc7	nc8	nc9	nc10	nc11	nc12
	1		2.6723	2.83702	3.39663	3.1794	3.20943	3.64906	2.43082	1.74645	1.74675	1.99208
	2		4.2103	4.0165	6.48285	2.38312	4.07709	3.0627	2.46118	1.87822	2.07436	1.57755
	3		2.80086	2.935	4.28015	2.78594	2.78337	2.74037	2.67875	2.47223	2.26771	1.77162
	4		4.42224	3.37639	2.76829	2.89111	2.32018	3.39252		3.27975	2.80624	1.58914
	5		2.45524	3.88847	2.8455
	6		3.79158
	7		3.71202
	8		2.76362
	9
	10
	11
	12
	13
	Remove outliers based on interquartile range
	Max		4.42224	4.0165	6.48285	3.1794	4.07709	3.64906	2.67875	3.27975	2.80624	1.99208
	Min		2.45524	2.83702	2.76829	2.38312	2.32018	2.74037	2.43082	1.74645	1.74675	1.57755
	Q1		2.74079	2.935	2.8455	2.68524	2.66757	2.98212	2.446	1.84528	1.99246	1.58624
	Q3		3.89626	3.88847	4.28015	2.96319	3.42635	3.45666	2.56996	2.67411	2.40234	1.82674
	IQR		1.15547	0.953469	1.43465	0.27795	0.758772	0.474539	0.123966	0.828835	0.409884	0.240496
	High Outlier?		FALSE	FALSE	TRUE	FALSE	FALSE	FALSE	FALSE	FALSE	FALSE	FALSE
	Low Outlier?		FALSE	FALSE	FALSE	FALSE	FALSE	FALSE	FALSE	FALSE	FALSE	FALSE
	Above		5.62946	5.31867	6.43212	3.38011	4.5645	4.16847	2.75591	3.91736	3.01717	2.18748
	Below		1.00759	1.5048	0.693528	2.26831	1.52941	2.27031	2.26005	0.602023	1.37763	1.2255
	Data minus outliers
	Sample		nc3	nc4	nc5	nc6	nc7	nc8	nc9	nc10	nc11	nc12
	1		2.6723	2.83702	3.39663	3.1794	3.20943	3.64906	2.43082	1.74645	1.74675	1.99208
	2		4.2103	4.0165		2.38312	4.07709	3.0627	2.46118	1.87822	2.07436	1.57755
	3		2.80086	2.935	4.28015	2.78594	2.78337	2.74037	2.67875	2.47223	2.26771	1.77162
	4		4.42224	3.37639	2.76829	2.89111	2.32018	3.39252		3.27975	2.80624	1.58914
	5		2.45524	3.88847	2.8455
	6		3.79158
	7		3.71202
	8		2.76362
	9
	10
	11
	12
	13
	Avg		3.35352	3.41068	3.32264	2.8099	3.09752	3.21116	2.52358	2.34416	2.22376	1.7326
	SEM		0.271274	0.239982	0.348481	0.164783	0.373612	0.197554	0.0780774	0.349534	0.221937	0.0972439
	Student's 2 tailed t-test
	array 1	array 2	p-value
	nc2	nc3
	nc2	nc4	0.887482
	nc2	nc5	0.947504
	nc2	nc6	0.21266
	nc2	nc7	0.594976
	nc2	nc8	0.738589
	nc2	nc9	0.104781
	nc2	nc10	0.0519867
	nc2	nc11	0.022794	*
	nc2	nc12	0.00225859	**
Figure 5D															Figure 5E
	% of Staufen particles colocalized with oskar															% of oskar particles colocalized with Staufen
	Sample	nc2	nc3	nc4	nc5	nc6	nc7	nc8	nc9	nc10	nc11	nc12				Sample	nc2	nc3	nc4	nc5	nc6	nc7	nc8	nc9	nc10	nc11	nc12
	1	56.8162	64.8801	83.0438	56.5574	35.4839	64.8415	60.5585	56.8539	18.6321	24.1053	16.1812				1	52.5631	49.4624	42.5418	50.5348	40.5316	40.5405	39.4318	20.9005	26.7129	27.524	24.4798
	2	57.1299	61.8371	71.5064	56.8598	60.0352	58.0691	70.6049	58.1413	22.7448	5.99509	23.3153				2	58.84	58.935	44.3195	40.8096	33.139	50.5832	49.8	40.7716	40.4858	40.8027	39.5
	3	59.863	72.471	61.3253	61.3759	64.433	50.9479	56.7003	45.3312	31.5574	15.9767	21.9066				3	69.586	48.1808	61.0312	67.4904	63.2911	68.1818	69.4616	53.3433	30.4657	38.7006	43.213
	4	64.9433	50.9503	60.3541	61.3996	67.0886	60.7919	51.8457	63.7168	32.9412	21.9066	24.5681				4	56.1002	70.4835	72.9572	73.7308	56.8588	73.1776	64.1581	38.5887	39.9773	43.213	40.6349
	5		55.4346	69.104	63.5053	74.3902	69.5602	59.471	49.1184	36.6906	7.65156	10.3878				5		58.9894	64.0573	67.4487	56.6517	58.2929	57.3191	54.3175	55.7039	51.5873	33.6323
	6		57.9755	62.7875	63.9594	77.2418	78.7479	66.793		53.6857	0.788955					6		59.2013	57.7564	48.5784	58.1619	48.7258	50.2567		55.3738	80
	7		68.3345	52.6316	71.7887											7		52.4461	61.599	64.3982
	8		54.463													8		61.6904
	9		70.2754													9		61.2583
	10		71.501													10		53.2477
	11															11
	12															12
	13															13
	Remove outliers based on interquartile range															Remove outliers based on interquartile range
	Max	64.9433	72.471	83.0438	71.7887	77.2418	78.7479	70.6049	63.7168	53.6857	24.1053	24.5681				Max	69.586	70.4835	72.9572	73.7308	63.2911	73.1776	69.4616	54.3175	55.7039	80	43.213
	Min	56.8162	50.9503	52.6316	56.5574	35.4839	50.9479	51.8457	45.3312	18.6321	0.788955	10.3878				Min	52.5631	48.1808	42.5418	40.8096	33.139	40.5405	39.4318	20.9005	26.7129	27.524	24.4798
	Q1	57.0515	56.0698	60.8397	59.1178	61.1347	58.7498	57.393	49.1184	24.948	6.4092	16.1812				Q1	55.2159	52.6465	51.0379	49.5566	44.5616	49.1901	49.9142	38.5887	32.8436	39.2261	33.6323
	Q3	61.1331	69.7902	70.3052	63.7323	72.5648	68.3805	65.2344	58.1413	35.7533	20.4241	23.3153				Q3	61.5265	60.744	62.8281	67.4696	57.8361	65.7096	62.4484	53.3433	51.6518	49.4937	40.6349
	IQR	4.08162	13.7203	9.4655	4.61449	11.4302	9.63074	7.84142	9.02288	10.8053	14.0149	7.13407				IQR	6.3106	8.09753	11.7902	17.913	13.2745	16.5195	12.5342	14.7546	18.8082	10.2676	7.00263
	High Outlier?	FALSE	FALSE	FALSE	TRUE	FALSE	FALSE	FALSE	FALSE	TRUE	FALSE	FALSE				High Outlier?	FALSE	FALSE	FALSE	FALSE	FALSE	FALSE	FALSE	FALSE	FALSE	TRUE	FALSE
	Low Outlier?	FALSE	FALSE	FALSE	FALSE	TRUE	FALSE	FALSE	FALSE	FALSE	FALSE	FALSE				Low Outlier?	FALSE	FALSE	FALSE	FALSE	FALSE	FALSE	FALSE	FALSE	FALSE	FALSE	FALSE
	Above	67.2555	90.3707	84.5034	70.6541	89.7101	82.8266	76.9965	71.6756	51.9612	41.4464	34.0164				Above	70.9924	72.8903	80.5134	94.339	77.7479	90.4888	81.2496	75.4752	79.8642	64.8951	51.1389
	Below	50.929	35.4893	46.6414	52.1961	43.9894	44.3037	45.6308	35.5841	8.74003	-14.6131	5.48013				Below	45.75	40.5002	33.3527	22.6871	24.6498	24.411	31.1129	16.4567	4.63122	23.8247	23.1283
	Data minus outliers															Data minus outliers
	Sample	nc2	nc3	nc4	nc5	nc6	nc7	nc8	nc9	nc10	nc11	nc12				Sample	nc2	nc3	nc4	nc5	nc6	nc7	nc8	nc9	nc10	nc11	nc12
	1	56.8162	64.8801	83.0438	56.5574		64.8415	60.5585	56.8539	18.6321	24.1053	16.1812				1	52.5631	49.4624	42.5418	50.5348	40.5316	40.5405	39.4318	20.9005	26.7129	27.524	24.4798
	2	57.1299	61.8371	71.5064	56.8598	60.0352	58.0691	70.6049	58.1413	22.7448	5.99509	23.3153				2	58.84	58.935	44.3195	40.8096	33.139	50.5832	49.8	40.7716	40.4858	40.8027	39.5
	3	59.863	72.471	61.3253	61.3759	64.433	50.9479	56.7003	45.3312	31.5574	15.9767	21.9066				3	69.586	48.1808	61.0312	67.4904	63.2911	68.1818	69.4616	53.3433	30.4657	38.7006	43.213
	4	64.9433	50.9503	60.3541	61.3996	67.0886	60.7919	51.8457	63.7168	32.9412	21.9066	24.5681				4	56.1002	70.4835	72.9572	73.7308	56.8588	73.1776	64.1581	38.5887	39.9773	43.213	40.6349
	5		55.4346	69.104	63.5053	74.3902	69.5602	59.471	49.1184	36.6906	7.65156	10.3878				5		58.9894	64.0573	67.4487	56.6517	58.2929	57.3191	54.3175	55.7039	51.5873	33.6323
	6		57.9755	62.7875	63.9594	77.2418	78.7479	66.793			0.788955					6		59.2013	57.7564	48.5784	58.1619	48.7258	50.2567		55.3738
	7		68.3345	52.6316												7		52.4461	61.599	64.3982
	8		54.463													8		61.6904
	9		70.2754													9		61.2583
	10		71.501													10		53.2477
	11															11
	12															12
	13															13
	Avg	59.6881	62.8123	65.8218	60.6096	68.6378	63.8264	60.9956	54.6323	28.5132	12.7374	19.2718				Avg	59.2723	57.3895	57.7518	58.9987	51.439	56.5836	55.0712	41.5843	41.4532	40.3655	36.292
	StDev	3.76119	7.8063	9.7723	3.2031	7.09234	9.64127	6.79168	7.36022	7.52754	9.35826	5.91227				StDev	7.34019	6.68646	10.865	12.2527	11.799	12.393	10.8652	13.5818	12.1489	8.68768	7.47753
	Student's 2 tailed t-test															Student's 2 tailed t-test
	array 1	array 2	p-value													array 1	array 2	p-value
	nc2	nc3	0.466222													nc2	nc3	0.650797
	nc2	nc4	0.266958													nc2	nc4	0.810633
	nc2	nc5	0.687618													nc2	nc5	0.968826
	nc2	nc6	0.0582133													nc2	nc6	0.274919
	nc2	nc7	0.443997													nc2	nc7	0.709266
	nc2	nc8	0.737764													nc2	nc8	0.520921
	nc2	nc9	0.255376													nc2	nc9	0.0529199
	nc2	nc10	0.000137837	***												nc2	nc10	0.0314611
	nc2	nc11	1.35845e-05	***												nc2	nc11	0.0104974
	nc2	nc12	7.08717e-06	***												nc2	nc12	0.00243335
