# Supplementary material for: Compartmentalized oskar degradation in the germ plasm safeguards germline development
Source: eLife journal article supplement (doi:10.7554/elife.49988), 2020-01-07
Supplement: supp [file elife-49988-supp-v1.zip › elife_poa_e49988_Figure_5_source_data_3.xlsx]

## Sheet: Sheet1
Figure 5F
	particles with <8 oskar mRNAs			particles with ≥8 and <32 oskar mRNAs			particles with >32 oskar RNAs
	nc3-4	nc7-8		nc3-4	nc7-8		nc3-4	nc7-8
	1.80834	1.06567		2.35587	1.13925		2.14823	1.12804
	1.62978	1.24689		1.96334	1.46317		1.70616	1.33917
	1.50483	1.20329		1.80928	1.26313		1.50622	1.20954
	1.61103	1.02039		1.91067	1.10396		1.66563	1.0421
	1.5198	1.30434		1.72201	1.43657		1.449	1.26343
	2.02522	1.20268		3.03552	1.28137		2.84451	1.24693
	1.45639	1.29712		1.83648	1.53249		1.72918	1.43152
	1.50525	1.29256		1.70286	1.53293		1.68169	1.40179
	1.51845	1.00879		2.13324	1.10501		2.2079	1.03846
	1.59991	1.08826		1.97677	1.16167		1.8283	1.11522
Ave	1.6179	1.173		2.0446	1.30196		1.87668	1.22162
SDev	0.174409	0.116982		0.399355	0.175334		0.418466	0.14092
Ttest	2.77963e-06	***		4.07035e-05	***		0.00018187	***
											large	med	small
										nc3-4	1.87668	2.0446	1.6179		0.132426	0.126378	0.0551929
										nc7-8	1.22162	1.30196	1.173		0.0445949	0.0174661	0.0370195
	small			med			large
	nc3-4	nc8-9		nc3-4	nc8-9		nc3-4	nc8-9
	1.80834	1.20268		2.35587	1.28137		2.14823	1.24693
	1.62978	1.29712		1.96334	1.53249		1.70616	1.43152
	1.50483	1.29256		1.80928	1.53293		1.50622	1.40179
	1.61103	1.00879		1.91067	1.10501		1.66563	1.03846
	1.5198	1.08826		1.72201	1.16167		1.449	1.11522
	2.02522	#REF!		3.03552	#REF!		2.84451	#REF!
	1.45639	#REF!		1.83648	#REF!		1.72918	#REF!
	1.50525	#REF!		1.70286	#REF!		1.68169	#REF!
	1.51845	#REF!		2.13324	#REF!		2.2079	#REF!
	1.59991	#REF!		1.97677	#REF!		1.8283	#REF!
Ave	1.6179	#REF!		2.0446	#REF!		1.87668	#REF!
SDev	0.174409	#REF!		0.399355	#REF!		0.418466	#REF!
SEM	0.0551929	#REF!		0.126378	#REF!		0.132426	#REF!
Ttest		#REF!			#REF!			#REF!
Ttest	#REF!			#REF!			#REF!
											large	med	small
										nc3-4	1.87668	2.0446	1.6179		0.132426	0.126378	0.0551929
										nc8-9	1.13702	1.21712	1.10041		0.081426	0.0927551	0.0533992

## Sheet: nc3
avg 5':3' ratio of small (<8), medium (<32), large (>32)				nc3_1								nc3_2								nc3_3								nc3_4								nc3_5
					Avg 5':3'	2.20785							Avg 5':3'	1.82342							Avg 5':3'	1.67047							Avg 5':3'	1.80194							Avg 5':3'	1.58277
					StDev	0.843739							StDev	0.625108							StDev	0.685297							StDev	0.547121							StDev	0.531765
sample	nc3_1			5'	3'	5':3'		5':3' smalls	5':3' mediums	5':3' larges		5'	3'	5':3'		5':3' smalls	5':3' mediums	5':3' larges		5'	3'	5':3'		5':3' smalls	5':3' mediums	5':3' larges		5'	3'	5':3'		5':3' smalls	5':3' mediums	5':3' larges		5'	3'	5':3'		5':3' smalls	5':3' mediums	5':3' larges
	avg	stdev		15.6465	7.42866	2.10624	medium		2.10624			5.35682	2.22847	2.40381	medium		2.40381			4.5805	2.4645	1.85859	medium		1.85859			2.06766	1.21844	1.69698	small	1.69698				6.55904	5.67646	1.15548	medium		1.15548
small	1.80834	0.713697		28.3657	17.5575	1.61558	large			1.61558		8.84704	3.23174	2.73755	medium		2.73755			23.3693	21.3367	1.09526	large			1.09526		5.40246	3.09108	1.74776	medium		1.74776			1.8756	1.28691	1.45745	small	1.45745
medium	2.35587	0.90437		16.531	9.43321	1.75243	large			1.75243		1.31713	1.05617	1.24709	small	1.24709				2.94658	1.80141	1.63571	small	1.63571				3.46931	1.21573	2.8537	small	2.8537				11.6374	6.88309	1.69072	medium		1.69072
larger	2.14823	0.63837		18.9017	9.67339	1.95399	large			1.95399		6.99767	1.48484	4.71276	medium		4.71276			2.94379	1.15373	2.55154	small	2.55154				6.88061	4.67483	1.47184	medium		1.47184			4.17275	1.7224	2.42263	medium		2.42263
				50.9812	31.1078	1.63885	large			1.63885		63.4966	41.2319	1.53999	large			1.53999		32.4647	29.0734	1.11664	large			1.11664		9.78958	4.78377	2.04642	medium		2.04642			14.0384	12.1903	1.1516	medium		1.1516
sample	nc3_2			18.5159	9.04867	2.04625	large			2.04625		3.42275	1.18264	2.89416	small	2.89416				3.69892	2.62062	1.41147	small	1.41147				2.00527	1.43903	1.39348	small	1.39348				3.72919	2.68119	1.39087	small	1.39087
	avg	stdev		5.09734	3.75436	1.35771	medium		1.35771			10.3357	5.53196	1.86837	medium		1.86837			7.43005	6.89798	1.07713	medium		1.07713			1.43332	2.7675	0.517911	small	0.517911				4.6761	3.48244	1.34277	medium		1.34277
small	1.62978	0.6175		4.05494	1.77468	2.28489	medium		2.28489			2.64144	1.94938	1.35502	small	1.35502				20.8018	13.4755	1.54368	large			1.54368		4.18989	1.94093	2.1587	medium		2.1587			16.9508	17.1147	0.990427	large			0.990427
medium	1.96334	0.637965		3.5738	1.33434	2.67832	small	2.67832				16.2137	8.90233	1.82128	large			1.82128		11.8055	12.7985	0.922413	medium		0.922413			7.99974	2.30029	3.47772	medium		3.47772			1.70873	1.35264	1.26326	small	1.26326
larger	1.70616	0.462978		4.24049	1.33556	3.17507	medium		3.17507			9.07602	6.16432	1.47235	medium		1.47235			8.2802	8.51687	0.972211	medium		0.972211			4.19742	3.05043	1.37601	medium		1.37601			8.04436	3.93549	2.04405	medium		2.04405
				53.9426	26.1198	2.0652	large			2.0652		3.75616	2.35373	1.59584	small	1.59584				9.27858	4.32314	2.14626	medium		2.14626			57.9473	35.8913	1.61452	large			1.61452		2.79832	1.12586	2.4855	small	2.4855
sample	nc3_3			2.09446	1.1257	1.86058	small	1.86058				5.94038	2.97028	1.99994	medium		1.99994			58.8818	52.3001	1.12584	large			1.12584		10.5547	6.90031	1.52959	medium		1.52959			4.21922	2.70327	1.56079	medium		1.56079
	avg	stdev		46.6523	27.012	1.7271	large			1.7271		19.8952	10.8967	1.8258	large			1.8258		1.23916	2.00835	0.617007	small	0.617007				13.141	7.79788	1.6852	medium		1.6852			2.73554	1.26985	2.15422	small	2.15422
small	1.50483	0.623148		6.03337	1.68613	3.57825	medium		3.57825			13.377	7.02531	1.90411	medium		1.90411			3.44299	2.79948	1.22987	small	1.22987				8.72565	5.28675	1.65047	medium		1.65047			3.31934	1.48308	2.23813	small	2.23813
medium	1.80928	0.635551		2.15294	1.29067	1.66807	small	1.66807				9.22783	4.3931	2.10053	medium		2.10053			2.24622	1.98576	1.13116	small	1.13116				13.8616	7.94205	1.74534	medium		1.74534			25.744	25.9861	0.990683	large			0.990683
larger	1.50622	0.772076		6.41184	3.19636	2.00598	medium		2.00598			2.06471	1.04461	1.97653	small	1.97653				6.37997	3.44166	1.85375	medium		1.85375			6.58304	3.88187	1.69584	medium		1.69584			1.787	1.59296	1.12181	small	1.12181
				7.69872	5.30099	1.45232	medium		1.45232			3.74288	3.77046	0.992685	small	0.992685				4.02946	4.50749	0.893946	medium		0.893946			18.9599	9.12526	2.07773	large			2.07773		1.1339	1.25982	0.900047	small	0.900047
sample	nc3_4			6.08955	2.52494	2.41176	medium		2.41176			8.82982	5.42008	1.62909	medium		1.62909			63.5472	60.5215	1.04999	large			1.04999		8.55287	4.10463	2.08371	medium		2.08371			2.36482	1.35414	1.74636	small	1.74636
	avg	stdev		2.08894	1.15967	1.80133	small	1.80133				18.0264	10.0625	1.79145	large			1.79145		8.5482	6.87967	1.24253	medium		1.24253			4.39308	2.76045	1.59144	medium		1.59144			1.04502	1.12536	0.928612	small	0.928612
small	1.61103	0.545625		10.435	5.31615	1.96289	medium		1.96289			7.47751	4.28669	1.74436	medium		1.74436			4.57786	2.87151	1.59423	medium		1.59423			4.02213	2.88349	1.39489	medium		1.39489			2.16587	1.17603	1.84168	small	1.84168
medium	1.91067	0.585194		70.8908	46.7882	1.51514	large			1.51514		20.3223	14.9043	1.36352	large			1.36352		6.67831	3.82868	1.74428	medium		1.74428			13.2467	8.60547	1.53933	medium		1.53933			2.44418	1.44696	1.68918	small	1.68918
larger	1.66563	0.4594		22.6118	10.6996	2.11333	large			2.11333		5.90449	4.2496	1.38942	medium		1.38942			7.63089	8.46254	0.901726	medium		0.901726			7.02423	3.47428	2.02178	medium		2.02178			5.98394	3.83364	1.5609	medium		1.5609
				1.82189	1.24337	1.46529	small	1.46529				7.36087	3.49988	2.10318	medium		2.10318			8.85954	6.23077	1.4219	medium		1.4219			4.54234	4.28783	1.05936	medium		1.05936			4.52254	4.98559	0.907122	medium		0.907122
sample	nc3_5			4.81648	2.5674	1.87601	medium		1.87601			6.94599	3.12047	2.22595	medium		2.22595			27.6754	30.9933	0.89295	large			0.89295		4.60568	4.24339	1.08538	medium		1.08538			35.3158	28.137	1.25514	large			1.25514
	avg	stdev		6.30641	3.13328	2.01271	medium		2.01271			7.63184	3.71695	2.05325	medium		2.05325			37.3489	31.1856	1.19763	large			1.19763		8.68864	4.419	1.9662	medium		1.9662			5.03622	2.76698	1.82011	medium		1.82011
small	1.5198	0.522367		5.53566	2.81061	1.96955	medium		1.96955			5.85424	2.54587	2.29951	medium		2.29951			2.89861	1.19341	2.42884	small	2.42884				8.21265	5.96697	1.37635	medium		1.37635			6.15897	4.4347	1.38881	medium		1.38881
medium	1.72201	0.625752		6.94271	2.90887	2.38674	medium		2.38674			8.76629	3.59231	2.4403	medium		2.4403			14.7261	9.48442	1.55266	medium		1.55266			8.78052	6.03906	1.45395	medium		1.45395			1.36655	6.77472	0.201713	small	0.201713
larger	1.449	0.608874		4.00337	1.73465	2.30789	medium		2.30789			3.84445	2.51668	1.52759	small	1.52759				3.44268	1.49985	2.29534	small	2.29534				16.4996	6.16969	2.6743	large			2.6743		1.5886	2.11977	0.74942	small	0.74942
				8.07903	12.5568	0.6434	medium		0.6434			5.30945	3.32477	1.59694	medium		1.59694			4.34729	2.07855	2.0915	medium		2.0915			32.2454	22.9676	1.40395	large			1.40395		5.31534	2.9476	1.80328	medium		1.80328
				7.93721	1.50418	5.27679	medium		5.27679			9.10581	5.31063	1.71464	medium		1.71464			3.40059	1.15068	2.95529	small	2.95529				3.9127	3.39406	1.15281	small	1.15281				4.19422	2.59088	1.61884	medium		1.61884
				3.69075	2.01729	1.82956	small	1.82956				11.2254	7.21258	1.55637	medium		1.55637			4.92108	2.3447	2.09881	medium		2.09881			1.48631	1.87643	0.792093	small	0.792093				3.08614	3.69617	0.834957	small	0.834957
				4.44031	3.33222	1.33254	medium		1.33254			8.09014	3.1685	2.5533	medium		2.5533			1.77148	2.09686	0.844822	small	0.844822				8.9558	4.84122	1.84991	medium		1.84991			5.37894	2.78455	1.93171	medium		1.93171
				13.6699	9.96513	1.37178	medium		1.37178			8.24662	3.77046	2.18716	medium		2.18716			4.86908	4.17419	1.16647	medium		1.16647			7.53409	4.73065	1.59261	medium		1.59261			3.09593	2.188	1.41496	small	1.41496
				9.41518	4.60895	2.04281	medium		2.04281			3.57026	1.19723	2.98209	small	2.98209				11.0104	8.02241	1.37246	medium		1.37246			8.61433	4.72035	1.82493	medium		1.82493			1.06486	3.07002	0.346858	small	0.346858
				13.1842	8.99227	1.46617	medium		1.46617			63.4377	45.6025	1.3911	large			1.3911		12.8225	8.11459	1.58017	medium		1.58017			5.26072	2.34636	2.24208	medium		2.24208			4.50406	2.19954	2.04773	medium		2.04773
				11.9171	6.33025	1.88257	medium		1.88257			7.72551	5.68701	1.35845	medium		1.35845			3.10844	1.13115	2.74804	small	2.74804				10.6441	5.82768	1.82647	medium		1.82647			1.92344	1.17252	1.64043	small	1.64043
				6.64067	7.56876	0.877379	medium		0.877379			4.82674	3.1077	1.55316	medium		1.55316			51.5702	43.7759	1.17805	large			1.17805		8.93981	5.47483	1.63289	medium		1.63289			2.18191	1.85988	1.17315	small	1.17315
				13.9411	7.33829	1.89978	medium		1.89978			8.266	4.97864	1.66029	medium		1.66029			3.62465	2.87884	1.25907	small	1.25907				11.9573	7.32037	1.63342	medium		1.63342			1.58126	1.09877	1.43912	small	1.43912
				3.66957	1.91539	1.91583	small	1.91583				5.33672	2.04484	2.60985	medium		2.60985			17.9831	13.4846	1.3336	large			1.3336		42.1595	25.9584	1.62412	large			1.62412		4.35892	3.31637	1.31437	medium		1.31437
				14.0668	6.97498	2.01675	medium		2.01675			3.81502	1.83568	2.07826	small	2.07826				4.83163	3.55948	1.3574	medium		1.3574			3.88887	2.06289	1.88516	small	1.88516				6.85529	4.33938	1.57979	medium		1.57979
				6.64251	3.2837	2.02287	medium		2.02287			2.72184	1.88797	1.44168	small	1.44168				8.20685	4.27064	1.92169	medium		1.92169			2.99959	1.55665	1.92695	small	1.92695				8.11312	5.58866	1.45171	medium		1.45171
				11.9236	5.7207	2.08428	medium		2.08428			6.19448	2.45466	2.52356	medium		2.52356			22.3533	15.2024	1.47038	large			1.47038		1.31008	1.00543	1.30301	small	1.30301				25.432	17.3154	1.46875	large			1.46875
				5.17699	1.70735	3.03217	medium		3.03217			6.68328	3.66953	1.82129	medium		1.82129			14.9984	10.535	1.42368	medium		1.42368			1.23702	1.03795	1.1918	small	1.1918				1.72123	1.64865	1.04402	small	1.04402
				3.45225	3.163	1.09145	small	1.09145				7.92541	3.34179	2.3716	medium		2.3716			3.61785	4.99341	0.724525	small	0.724525				11.7616	8.19517	1.43519	medium		1.43519			4.38474	3.24362	1.35181	medium		1.35181
				9.20384	6.44731	1.42755	medium		1.42755			4.14915	2.42183	1.71323	medium		1.71323			4.55062	1.00173	4.54275	medium		4.54275			6.82449	3.1843	2.14317	medium		2.14317			15.8205	12.8049	1.2355	medium		1.2355
				6.52464	4.22926	1.54274	medium		1.54274			17.3528	9.59002	1.80946	large			1.80946		12.8119	8.80988	1.45427	medium		1.45427			4.97538	3.06669	1.6224	medium		1.6224			28.9279	17.7007	1.63429	large			1.63429
				22.6942	11.1545	2.03453	large			2.03453		6.68113	4.2496	1.57218	medium		1.57218			52.9929	33.0596	1.60295	large			1.60295		4.94998	1.45584	3.40009	medium		3.40009			1.30594	1.27387	1.02518	small	1.02518
				11.7808	4.82851	2.43985	medium		2.43985			3.52252	2.16888	1.62412	small	1.62412				2.50247	1.06522	2.34926	small	2.34926				11.8892	6.39137	1.8602	medium		1.8602			5.32186	2.25924	2.3556	medium		2.3556
				6.99934	2.29871	3.0449	medium		3.0449			7.27546	2.7143	2.68042	medium		2.68042			13.5423	12.5659	1.0777	medium		1.0777			4.77846	2.5263	1.89148	medium		1.89148			1.3111	1.11582	1.17501	small	1.17501
				36.0138	20.3051	1.77363	large			1.77363		8.42032	5.15376	1.63382	medium		1.63382			2.63617	2.65114	0.994352	small	0.994352				2.25236	1.73443	1.29862	small	1.29862				1.79352	1.32855	1.34998	small	1.34998
				8.47223	4.61865	1.83435	medium		1.83435			6.36459	2.82496	2.25298	medium		2.25298			1.71453	1.53282	1.11855	small	1.11855				9.61336	5.38052	1.7867	medium		1.7867			5.7589	3.80755	1.51249	medium		1.51249
				5.22211	3.73495	1.39817	medium		1.39817			22.533	14.9815	1.50406	large			1.50406		6.52017	3.32751	1.95947	medium		1.95947			8.6115	2.34907	3.66592	medium		3.66592			28.0561	32.3674	0.866799	large			0.866799
				30.7866	13.7965	2.23148	large			2.23148		37.7683	25.2319	1.49685	large			1.49685		34.7075	23.1308	1.50049	large			1.50049		9.01664	5.72036	1.57624	medium		1.57624			7.29423	4.20241	1.73573	medium		1.73573
				18.0762	7.19697	2.51164	large			2.51164		22.4623	15.0764	1.4899	large			1.4899		3.33591	2.3502	1.41942	small	1.41942				2.56279	1.57508	1.62709	small	1.62709				27.5429	34.7326	0.793	large			0.793
				17.177	10.7039	1.60475	large			1.60475		22.6263	12.806	1.76686	large			1.76686		8.03477	3.06563	2.62092	medium		2.62092			5.14188	2.01248	2.555	medium		2.555			34.5689	26.697	1.29486	large			1.29486
				2.72708	2.1671	1.2584	small	1.2584				1.00705	1.02941	0.978276	small	0.978276				48.723	44.1049	1.10471	large			1.10471		3.11717	1.06451	2.92828	small	2.92828				4.89679	2.37564	2.06125	medium		2.06125
				4.4928	3.02593	1.48477	medium		1.48477			3.56523	2.87968	1.23806	small	1.23806				44.7941	42.2718	1.05967	large			1.05967		17.5479	11.7291	1.4961	large			1.4961		4.13959	4.16478	0.993953	medium		0.993953
				8.19874	4.89401	1.67526	medium		1.67526			14.2573	9.23614	1.54365	medium		1.54365			14.1681	7.31064	1.93801	medium		1.93801			5.986	3.7881	1.58021	medium		1.58021			3.72185	1.9853	1.8747	small	1.8747
				10.4295	4.1486	2.51398	medium		2.51398			15.8573	8.0377	1.97286	medium		1.97286			4.72022	1.62499	2.90476	medium		2.90476			3.3696	1.96749	1.71264	small	1.71264				1.6367	1.76154	0.929132	small	0.929132
				5.57664	1.77286	3.14556	medium		3.14556			6.09434	2.91981	2.08724	medium		2.08724			4.34482	1.7013	2.55383	medium		2.55383			6.89002	3.44772	1.99843	medium		1.99843			11.9119	9.24118	1.289	medium		1.289
				3.96009	2.1398	1.85068	small	1.85068				6.79634	4.39188	1.54748	medium		1.54748			43.3606	37.8931	1.14429	large			1.14429		4.66714	4.79407	0.973524	medium		0.973524			4.22955	2.3626	1.79021	medium		1.79021
				6.88055	2.69962	2.54871	medium		2.54871			5.13503	2.67416	1.92024	medium		1.92024			2.69837	2.16462	1.24658	small	1.24658				6.56297	4.00815	1.6374	medium		1.6374			5.61241	4.83357	1.16113	medium		1.16113
				7.53389	4.38332	1.71876	medium		1.71876			6.49379	2.92042	2.22358	medium		2.22358			3.08677	2.79399	1.10479	small	1.10479				8.58579	5.01683	1.7114	medium		1.7114			3.87895	6.43054	0.603207	small	0.603207
				9.3894	5.5818	1.68214	medium		1.68214			51.9981	33.5012	1.55212	large			1.55212		1.75012	1.32221	1.32363	small	1.32363				5.46642	3.2591	1.67728	medium		1.67728			2.35205	3.3555	0.700952	small	0.700952
				6.59601	2.75118	2.39752	medium		2.39752			2.50543	1.0665	2.3492	small	2.3492				4.39217	2.91607	1.50619	medium		1.50619			6.04464	4.12143	1.46664	medium		1.46664			4.02734	2.60041	1.54873	medium		1.54873
				13.9374	6.76755	2.05945	medium		2.05945			6.06635	3.28342	1.84757	medium		1.84757			3.56183	1.96928	1.8087	small	1.8087				22.1501	14.6852	1.50833	large			1.50833		4.38148	2.24821	1.94888	medium		1.94888
				7.39208	3.50569	2.1086	medium		2.1086			3.35851	1.07198	3.13301	small	3.13301				1.17015	1.37776	0.849312	small	0.849312				6.04809	3.16154	1.91302	medium		1.91302			4.33229	2.19553	1.97324	medium		1.97324
				7.55001	3.64822	2.06951	medium		2.06951			5.91095	3.41172	1.73254	medium		1.73254			29.6128	21.4051	1.38345	large			1.38345		12.6377	7.24937	1.74329	medium		1.74329			4.09719	2.86733	1.42892	medium		1.42892
				6.29075	2.45155	2.56603	medium		2.56603			4.49691	1.68306	2.67187	medium		2.67187			7.74417	3.11691	2.48457	medium		2.48457			1.08494	1.05041	1.03287	small	1.03287				14.8176	13.3603	1.10907	medium		1.10907
				2.61474	1.44049	1.81518	small	1.81518				4.14915	2.99886	1.38358	medium		1.38358			10.3283	5.81628	1.77577	medium		1.77577			1.92844	1.00597	1.917	small	1.917				30.872	26.2786	1.1748	large			1.1748
				23.7997	11.6579	2.0415	large			2.0415		3.76334	1.45687	2.58318	small	2.58318				6.82965	4.17786	1.63473	medium		1.63473			5.74487	3.65856	1.57026	medium		1.57026			4.49889	3.71473	1.21109	medium		1.21109
				3.4283	2.42002	1.41665	small	1.41665				4.87662	3.06696	1.59005	medium		1.59005			3.3127	3.84516	0.861522	small	0.861522				6.48364	4.67808	1.38596	medium		1.38596			3.1318	1.95621	1.60096	small	1.60096
				1.37989	3.72404	0.370536	small	0.370536				8.45262	4.54389	1.86022	medium		1.86022			5.17083	3.11141	1.66189	medium		1.66189			12.3477	6.69489	1.84434	medium		1.84434			3.03613	1.63862	1.85286	small	1.85286
				7.78528	1.15057	6.76647	medium		6.76647			16.4796	8.80869	1.87083	large			1.87083		4.33708	3.3501	1.29461	medium		1.29461			5.63293	4.40924	1.27753	medium		1.27753			2.9508	2.62299	1.12497	small	1.12497
				28.7884	16.4033	1.75503	large			1.75503		6.65134	3.80086	1.74996	medium		1.74996			15.6601	12.6141	1.24147	medium		1.24147			15.0983	7.82227	1.93017	medium		1.93017			3.55199	2.65711	1.33679	small	1.33679
				8.06982	2.70569	2.98254	medium		2.98254			6.07066	3.45306	1.75805	medium		1.75805			30.1268	20.6011	1.46239	large			1.46239		5.52663	3.04175	1.81692	medium		1.81692			10.9294	6.11647	1.78688	medium		1.78688
				11.1464	4.51615	2.46811	medium		2.46811			6.45575	4.38762	1.47135	medium		1.47135			8.98272	5.17104	1.73712	medium		1.73712			6.33438	3.14636	2.01324	medium		2.01324			2.34933	1.22369	1.91987	small	1.91987
				8.84656	5.78742	1.52858	medium		1.52858			47.3249	38.0834	1.24266	large			1.24266		5.55613	1.75196	3.17137	medium		3.17137			6.07098	2.56695	2.36505	medium		2.36505			3.93249	3.63647	1.0814	small	1.0814
				46.0215	25.3507	1.81539	large			1.81539		35.0838	22.2318	1.57809	large			1.57809		13.6636	7.58106	1.80234	medium		1.80234			1.30632	2.08673	0.626013	small	0.626013				1.12058	1.01498	1.10404	small	1.10404
				14.1875	3.38863	4.18678	medium		4.18678			2.05609	2.14395	0.959019	small	0.959019				4.04338	2.61757	1.54471	medium		1.54471			2.18933	1.15285	1.89905	small	1.89905				2.98748	1.37471	2.17317	small	2.17317
				6.66047	2.19985	3.02769	medium		3.02769			2.1896	2.32758	0.940719	small	0.940719				11.1429	5.27726	2.11149	medium		2.11149			3.7487	2.95015	1.27068	small	1.27068				3.56014	2.99176	1.18998	small	1.18998
				4.38552	1.67945	2.61128	medium		2.61128			5.51114	3.67926	1.4979	medium		1.4979			2.05713	1.59813	1.28721	small	1.28721				2.87165	2.20435	1.30272	small	1.30272				1.52581	1.03103	1.47989	small	1.47989
				38.2542	17.2337	2.21974	large			2.21974		5.46951	2.16949	2.5211	medium		2.5211			18.9273	14.1463	1.33796	large			1.33796		3.63644	2.15232	1.68955	small	1.68955				8.4466	4.71316	1.79213	medium		1.79213
				1.05252	1.5072	0.69833	small	0.69833				1.75032	1.30546	1.34076	small	1.34076				38.2814	29.7565	1.28649	large			1.28649		5.37423	3.07536	1.74752	medium		1.74752			4.98431	2.87335	1.73467	medium		1.73467
				2.66539	1.05049	2.53727	small	2.53727				10.6447	6.88971	1.54502	medium		1.54502			28.8595	15.4698	1.86554	large			1.86554		3.2564	2.46939	1.31871	small	1.31871				2.417	2.22412	1.08672	small	1.08672
				3.78559	1.62002	2.33676	small	2.33676				37.5659	23.7027	1.58488	large			1.58488		4.82978	1.9937	2.42252	medium		2.42252			2.79389	1.59676	1.74973	small	1.74973				2.98069	2.12528	1.40249	small	1.40249
				5.23316	2.37513	2.20331	medium		2.20331			3.92161	3.00494	1.30505	small	1.30505				8.87192	4.05455	2.18814	medium		2.18814			4.45454	1.29649	3.43586	medium		3.43586			8.26233	5.90424	1.39939	medium		1.39939
				9.1799	6.56558	1.39819	medium		1.39819			10.1753	5.46386	1.86229	medium		1.86229			6.52388	4.43119	1.47227	medium		1.47227			2.26365	1.43741	1.57481	small	1.57481				29.7047	17.7363	1.6748	large			1.6748
				4.21563	2.02153	2.08536	medium		2.08536			40.4005	25.5067	1.58392	large			1.58392		30.2537	14.802	2.0439	large			2.0439		12.2376	6.48297	1.88765	medium		1.88765			10.1945	4.99763	2.03986	medium		2.03986
				21.4598	7.45231	2.87962	large			2.87962		1.40004	1.15163	1.2157	small	1.2157				21.328	14.6939	1.45148	large			1.45148		1.35587	1.01301	1.33845	small	1.33845				2.55697	1.33407	1.91667	small	1.91667
				4.97809	1.38287	3.59983	medium		3.59983			5.49571	3.22262	1.70536	medium		1.70536			6.63344	4.83103	1.37309	medium		1.37309			7.31867	4.22171	1.73358	medium		1.73358			3.54682	2.21058	1.60448	small	1.60448
				13.3292	5.48961	2.42808	medium		2.42808			4.5224	3.31139	1.36571	medium		1.36571			3.59061	2.03094	1.76796	small	1.76796				6.47893	3.11276	2.08141	medium		2.08141			6.4207	4.1718	1.53907	medium		1.53907
				20.324	10.0161	2.02913	large			2.02913		22.6335	11.8471	1.91047	large			1.91047		5.55737	3.75787	1.47886	medium		1.47886			12.7553	8.04775	1.58495	medium		1.58495			1.85033	1.41284	1.30965	small	1.30965
				12.8232	5.90265	2.17245	medium		2.17245			3.28314	2.58296	1.27108	small	1.27108				2.48978	1.6836	1.47885	small	1.47885				5.77842	3.11059	1.85766	medium		1.85766			6.77484	5.15066	1.31534	medium		1.31534
				14.6585	7.29401	2.00966	medium		2.00966			3.48269	1.49882	2.32362	small	2.32362				15.5561	9.98009	1.55871	medium		1.55871			7.14715	3.71493	1.9239	medium		1.9239			12.3886	11.1196	1.11412	medium		1.11412
				7.9828	4.53434	1.76052	medium		1.76052			4.10465	2.30204	1.78305	medium		1.78305			42.517	33.8099	1.25753	large			1.25753		4.93305	2.37237	2.07937	medium		2.07937			5.41373	3.66757	1.47611	medium		1.47611
				6.22169	3.12722	1.98953	medium		1.98953			16.2194	7.46188	2.17364	large			2.17364		15.5051	10.9482	1.41621	medium		1.41621			5.85086	5.2461	1.11528	medium		1.11528			3.73191	1.88747	1.9772	small	1.9772
				3.70916	1.2464	2.9759	small	2.9759				5.0855	5.53986	0.917983	medium		0.917983			4.40238	3.34888	1.31459	medium		1.31459			2.67473	2.03308	1.31561	small	1.31561				4.04066	1.51068	2.67473	medium		2.67473
				3.0328	1.73162	1.75143	small	1.75143				2.60412	1.65995	1.56879	small	1.56879				31.8927	20.6567	1.54394	large			1.54394		2.83371	1.66776	1.69911	small	1.69911				3.99908	2.08866	1.91466	small	1.91466
				14.03	4.45064	3.15235	medium		3.15235			2.98742	1.22399	2.44073	small	2.44073				3.98303	3.55276	1.12111	small	1.12111				4.98353	3.68403	1.35274	medium		1.35274			3.38049	3.43277	0.984771	small	0.984771
				32.0901	16.0406	2.00055	large			2.00055		16.6429	8.56426	1.9433	large			1.9433		6.09339	3.80854	1.59993	medium		1.59993			4.40719	1.21085	3.63976	medium		3.63976			9.34513	5.35285	1.74582	medium		1.74582
				13.6032	5.45868	2.49203	medium		2.49203			2.21257	1.79494	1.23267	small	1.23267				4.34018	2.70669	1.6035	medium		1.6035			7.02454	3.55395	1.97654	medium		1.97654			1.70492	1.15446	1.47682	small	1.47682
				53.6042	29.7413	1.80235	large			1.80235		25.8273	16.2347	1.59087	large			1.59087		9.47294	6.71668	1.41036	medium		1.41036			11.7105	6.57186	1.78192	medium		1.78192			2.10825	1.03655	2.03391	small	2.03391
				22.4626	10.9089	2.05912	large			2.05912		21.5357	11.6507	1.84845	large			1.84845		6.55359	5.11305	1.28174	medium		1.28174			4.5414	1.02169	4.44501	medium		4.44501			10.6198	8.57489	1.23848	medium		1.23848
				6.16644	2.75603	2.23744	medium		2.23744			8.33706	6.00562	1.38821	medium		1.38821			34.7589	28.3977	1.224	large			1.224		5.68216	4.16209	1.36522	medium		1.36522			3.29542	2.81465	1.17081	small	1.17081
				16.7073	6.42547	2.60017	large			2.60017		8.40596	5.96731	1.40867	medium		1.40867			4.02327	2.33799	1.72082	medium		1.72082			12.3759	8.7838	1.40895	medium		1.40895			5.99943	3.80605	1.57629	medium		1.57629
				7.75305	3.09022	2.5089	medium		2.5089			49.6014	31.7099	1.56422	large			1.56422		40.0916	37.4066	1.07178	large			1.07178		5.07729	2.66939	1.90204	medium		1.90204			10.9582	6.19072	1.7701	medium		1.7701
				38.2395	16.6017	2.30335	large			2.30335		3.44859	1.39545	2.4713	small	2.4713				3.44794	1.9467	1.77118	small	1.77118				2.10874	1.19296	1.76765	small	1.76765				3.22122	2.31092	1.39391	small	1.39391
				6.55457	1.45201	4.51414	medium		4.51414			3.665	2.54283	1.44131	small	1.44131				53.7824	38.2227	1.40708	large			1.40708		3.1294	1.29594	2.41477	small	2.41477				31.3224	27.3247	1.1463	large			1.1463
				10.6694	4.75694	2.24291	medium		2.24291			9.55586	5.30516	1.80124	medium		1.80124			3.05056	1.81667	1.67921	small	1.67921				14.626	7.09706	2.06086	medium		2.06086			2.38004	1.2533	1.89902	small	1.89902
				5.90952	1.84503	3.20293	medium		3.20293			1.35876	1.02941	1.31994	small	1.31994				42.1004	32.0964	1.31169	large			1.31169		6.29236	3.561	1.76702	medium		1.76702			1.75765	1.08472	1.62037	small	1.62037
				7.15911	4.12252	1.73659	medium		1.73659			7.32247	3.58623	2.04183	medium		2.04183			13.7348	7.45165	1.84319	medium		1.84319			1.34521	1.44771	0.929198	small	0.929198				19.2898	15.6226	1.23474	large			1.23474
				11.5119	8.73025	1.31863	medium		1.31863			20.2623	10.9265	1.85442	large			1.85442		3.43123	1.86856	1.8363	small	1.8363				4.21341	2.58538	1.6297	medium		1.6297			5.36426	3.04444	1.76199	medium		1.76199
				7.18029	2.76755	2.59445	medium		2.59445			3.62768	1.43862	2.52163	small	2.52163				7.38486	3.77008	1.95881	medium		1.95881			6.41058	3.87699	1.65349	medium		1.65349			38.749	31.5948	1.22643	large			1.22643
				9.41518	5.83351	1.61398	medium		1.61398			8.43432	3.24329	2.60054	medium		2.60054			2.93699	2.88982	1.01632	small	1.01632				8.05242	4.14149	1.94433	medium		1.94433			5.63687	4.17732	1.3494	medium		1.3494
				5.43621	2.70993	2.00603	medium		2.00603			3.40768	2.14578	1.58809	small	1.58809				4.71218	4.91771	0.958206	medium		0.958206			2.02941	1.3664	1.48522	small	1.48522				3.15654	1.15245	2.73898	small	2.73898
				2.11472	1.41137	1.49834	small	1.49834				1.02248	1.2702	0.80498	small	0.80498				4.35287	2.43016	1.79118	medium		1.79118			14.0735	7.51495	1.87274	medium		1.87274			5.26452	3.60335	1.46101	medium		1.46101
				8.71165	4.12919	2.10977	medium		2.10977			5.9533	3.2214	1.84805	medium		1.84805			5.59668	1.53343	3.64978	medium		3.64978			6.94395	3.33173	2.08419	medium		2.08419			4.36055	2.35758	1.84959	medium		1.84959
				5.60012	3.38499	1.6544	medium		1.6544			33.8482	22.9645	1.47394	large			1.47394		46.8064	33.5925	1.39336	large			1.39336		3.20623	2.02223	1.58549	small	1.58549				1.12167	2.2748	0.493084	small	0.493084
				28.9389	15.2795	1.89398	large			1.89398		2.87185	1.8454	1.55622	small	1.55622				6.10763	3.52285	1.73372	medium		1.73372			2.83214	1.36153	2.08012	small	2.08012				8.61837	7.21523	1.19447	medium		1.19447
				9.35256	3.99636	2.34027	medium		2.34027			22.8887	17.1674	1.33326	large			1.33326		2.5359	1.01699	2.49352	small	2.49352				3.5684	1.75231	2.03639	small	2.03639				5.38166	3.04945	1.76479	medium		1.76479
				6.19176	3.47172	1.78348	medium		1.78348			9.33083	6.09075	1.53197	medium		1.53197			2.16947	1.00234	2.1644	small	2.1644				4.96189	2.23524	2.21984	medium		2.21984			2.68798	1.50968	1.7805	small	1.7805
				3.87952	2.15315	1.80179	small	1.80179				5.18527	1.92688	2.69102	medium		2.69102			3.88771	3.39832	1.14401	small	1.14401				6.46639	3.69758	1.74882	medium		1.74882			3.68	2.38819	1.54092	small	1.54092
				6.50577	4.49613	1.44697	medium		1.44697			5.07581	2.14274	2.36884	medium		2.36884			12.725	7.92108	1.60647	medium		1.60647			17.2964	9.21035	1.87793	large			1.87793		32.78	28.2995	1.15832	large			1.15832
				11.0414	4.3069	2.56365	medium		2.56365			1.87701	1.10238	1.70269	small	1.70269				2.17318	1.67871	1.29455	small	1.29455				21.4791	15.3936	1.39533	large			1.39533		28.7497	22.0531	1.30366	large			1.30366
				15.9564	9.25489	1.7241	medium		1.7241			4.19796	2.89975	1.4477	medium		1.4477			39.6935	33.8996	1.17091	large			1.17091		3.81298	1.77562	2.14741	small	2.14741				2.77767	1.3697	2.02794	small	2.02794
				7.42984	4.38514	1.69432	medium		1.69432			9.0814	4.1663	2.17973	medium		2.17973			12.0676	6.53415	1.84685	medium		1.84685			3.18114	1.3431	2.36851	small	2.36851				3.46203	3.29128	1.05188	small	1.05188
				2.96328	1.68734	1.75618	small	1.75618				6.01503	3.60264	1.66962	medium		1.66962			6.91074	5.22171	1.32346	medium		1.32346			3.47464	1.3122	2.64795	small	2.64795				2.91193	1.65919	1.75503	small	1.75503
				28.3454	16.8127	1.68595	large			1.68595		5.74012	3.80634	1.50804	medium		1.50804			3.21614	1.86123	1.72796	small	1.72796				3.76971	2.15557	1.74882	small	1.74882				9.68731	3.95255	2.4509	medium		2.4509
				6.45052	2.10281	3.06758	medium		3.06758			6.34844	3.87261	1.63932	medium		1.63932			9.39835	6.9578	1.35076	medium		1.35076			4.75306	3.22062	1.47582	medium		1.47582			18.4421	17.2998	1.06603	large			1.06603
				7.34558	1.73708	4.22871	medium		4.22871			12.7181	11.2208	1.13344	medium		1.13344			3.01157	3.742	0.804802	small	0.804802				7.13774	3.68729	1.93577	medium		1.93577			3.74958	2.57031	1.4588	small	1.4588
				3.23999	1.50781	2.14881	small	2.14881				7.49653	2.1172	3.54078	medium		3.54078			39.8273	28.3556	1.40457	large			1.40457		4.65178	2.20977	2.1051	medium		2.1051			3.81399	2.47549	1.5407	small	1.5407
				28.4315	17.8857	1.58963	large			1.58963		7.15451	12.4308	0.575547	medium		0.575547			1.38308	1.05301	1.31345	small	1.31345				6.43378	4.88187	1.31789	medium		1.31789			5.22728	3.04494	1.71671	medium		1.71671
				39.1695	17.6267	2.22217	large			2.22217		4.81454	2.40967	1.99801	medium		1.99801			8.33869	3.25914	2.55855	medium		2.55855			10.8037	6.13662	1.76052	medium		1.76052			3.93303	2.15338	1.82644	small	1.82644
				1.5438	1.39863	1.10379	small	1.10379				61.2341	39.6741	1.54343	large			1.54343		4.30242	1.95707	2.1984	medium		2.1984			9.39323	4.8293	1.94505	medium		1.94505			5.60996	2.3054	2.4334	medium		2.4334
				4.18202	2.22835	1.87673	medium		1.87673			3.89649	2.18469	1.78354	small	1.78354				4.52896	2.90142	1.56094	medium		1.56094			4.25009	2.00814	2.11643	medium		2.11643			4.30891	4.35393	0.989661	medium		0.989661
				20.8378	13.0602	1.59552	large			1.59552		2.69384	1.98343	1.35817	small	1.35817				4.4683	1.4852	3.00855	medium		3.00855			8.11043	3.9507	2.05291	medium		2.05291			1.52228	1.26935	1.19926	small	1.19926
				6.98737	2.10523	3.31905	medium		3.31905			5.08191	1.52679	3.32849	medium		3.32849			9.21483	4.62897	1.99069	medium		1.99069			10.6908	6.55234	1.6316	medium		1.6316			3.39816	1.69832	2.00089	small	2.00089
				4.40716	4.40212	1.00114	medium		1.00114			4.20478	3.39591	1.23819	medium		1.23819			6.94911	3.81647	1.82082	medium		1.82082			10.2994	5.95126	1.73063	medium		1.73063			2.75375	1.50115	1.83443	small	1.83443
				25.2473	13.2749	1.90188	large			1.90188		10.8583	7.0551	1.53907	medium		1.53907			2.98805	1.28925	2.31766	small	2.31766				55.1311	34.2918	1.60771	large			1.60771		2.02862	1.59346	1.27309	small	1.27309
				9.18082	3.44018	2.6687	medium		2.6687			5.76057	2.10443	2.73735	medium		2.73735			4.86691	2.98933	1.6281	medium		1.6281			6.88155	4.49379	1.53135	medium		1.53135			3.10055	1.96674	1.57649	small	1.57649
				2.67597	2.4279	1.10218	small	1.10218				3.09508	2.09166	1.47973	small	1.47973				5.10212	2.30441	2.21407	medium		2.21407			6.00262	2.94636	2.0373	medium		2.0373			4.08279	1.8659	2.18811	medium		2.18811
				6.70928	2.74875	2.44085	medium		2.44085			23.1496	11.3108	2.04669	large			2.04669		4.84804	2.37461	2.04161	medium		2.04161			6.32497	2.96099	2.1361	medium		2.1361			2.74913	2.14686	1.28054	small	1.28054
				10.3061	4.8649	2.11846	medium		2.11846			6.87744	4.12313	1.66802	medium		1.66802			56.53	39.3606	1.43621	large			1.43621		10.4268	6.14367	1.69715	medium		1.69715			1.32143	1.76104	0.750369	small	0.750369
				4.92882	1.54602	3.18807	medium		3.18807			6.62514	2.70153	2.45237	medium		2.45237			5.44379	3.27196	1.66377	medium		1.66377			2.86789	1.11437	2.57355	small	2.57355				7.35021	9.1594	0.802478	medium		0.802478
				10.8752	5.1069	2.12951	medium		2.12951			6.34305	4.24048	1.49583	medium		1.49583			7.41055	3.2274	2.29614	medium		2.29614			5.77341	2.66994	2.16238	medium		2.16238			19.0724	10.367	1.83971	large			1.83971
				35.5294	19.1539	1.85494	large			1.85494		4.51953	1.27567	3.54286	medium		3.54286			13.4188	9.86045	1.36088	medium		1.36088			6.11363	4.03634	1.51465	medium		1.51465			5.26724	3.97463	1.32522	medium		1.32522
				2.56824	1.09901	2.33685	small	2.33685				10.1373	5.63228	1.79985	medium		1.79985			9.33677	3.43434	2.71865	medium		2.71865			5.88378	5.22822	1.12539	medium		1.12539			3.92732	3.46387	1.1338	small	1.1338
				1.73625	1.48779	1.167	small	1.167				14.1095	7.93494	1.77815	medium		1.77815			8.52406	3.71514	2.29441	medium		2.29441			1.75065	1.12142	1.5611	small	1.5611				3.00243	1.55383	1.93228	small	1.93228
				45.5353	9.38044	4.85428	large			4.85428		5.93176	3.15452	1.8804	medium		1.8804			2.34773	1.50657	1.55833	small	1.55833				2.7572	2.31655	1.19022	small	1.19022				3.14974	1.16399	2.70599	small	2.70599
				9.59797	4.96619	1.93266	medium		1.93266			41.4667	23.2047	1.787	large			1.787		3.95023	1.08658	3.63546	small	3.63546				4.80292	1.0244	4.68853	medium		4.68853			4.34017	3.18692	1.36187	medium		1.36187
				3.98219	2.53404	1.57148	small	1.57148				37.9801	20.0757	1.89184	large			1.89184		59.934	47.3934	1.26461	large			1.26461		4.90232	1.10732	4.42717	medium		4.42717			1.8063	1.8664	0.967798	small	0.967798
				16.9334	6.67657	2.53624	large			2.53624		5.07796	3.3722	1.50583	medium		1.50583			6.24411	3.90743	1.59801	medium		1.59801			2.2649	1.38646	1.63359	small	1.63359				23.9464	22.1951	1.0789	large			1.0789
				6.48689	1.79712	3.60961	medium		3.60961			18.447	13.3465	1.38216	large			1.38216		22.4176	16.4477	1.36296	large			1.36296		8.31205	2.77346	2.997	medium		2.997			3.41392	2.4514	1.39264	small	1.39264
				20.2788	11.4996	1.76344	large			1.76344		7.29053	3.35578	2.17253	medium		2.17253			10.3027	8.4076	1.2254	medium		1.2254			8.07123	5.20274	1.55134	medium		1.55134			3.52725	4.96753	0.710062	small	0.710062
				9.90276	5.17847	1.9123	medium		1.9123			13.4269	8.09971	1.6577	medium		1.6577			28.9641	22.0931	1.311	large			1.311		7.57203	4.1274	1.83458	medium		1.83458			2.90486	1.57791	1.84096	small	1.84096
				9.93453	4.02729	2.4668	medium		2.4668			2.23841	1.59793	1.40082	small	1.40082				6.56845	1.86856	3.51525	medium		3.51525			2.04258	1.14255	1.78773	small	1.78773				6.72646	4.36296	1.54172	medium		1.54172
				5.0186	2.64443	1.8978	medium		1.8978			5.43075	2.82496	1.92242	medium		1.92242			3.90226	1.76784	2.20736	small	2.20736				1.73685	1.51004	1.1502	small	1.1502				3.42207	2.54774	1.34318	small	1.34318
				24.9346	10.9992	2.26694	large			2.26694		22.636	12.4369	1.82007	large			1.82007		8.96167	4.98303	1.79844	medium		1.79844			3.44674	2.28619	1.50763	small	1.50763				5.02263	3.2391	1.55062	medium		1.55062
				9.66795	4.68961	2.06157	medium		2.06157			1.79589	1.16257	1.54476	small	1.54476				9.83967	6.74903	1.45794	medium		1.45794			2.17741	1.07318	2.02894	small	2.02894				18.3119	12.847	1.42538	large			1.42538
				6.67843	3.06414	2.17954	medium		2.17954			9.13882	4.63874	1.97011	medium		1.97011			61.6934	48.4189	1.27416	large			1.27416		2.69637	1.77616	1.51809	small	1.51809				8.08078	11.2757	0.716658	medium		0.716658
				5.28473	2.62259	2.01508	medium		2.01508			12.7636	3.71878	3.43221	medium		3.43221			2.34371	1.96135	1.19495	small	1.19495				7.30362	5.04827	1.44676	medium		1.44676			4.85521	2.98523	1.62641	medium		1.62641
				87.6198	50.4146	1.73799	large			1.73799		5.99026	3.66709	1.63352	medium		1.63352			24.256	18.7826	1.2914	large			1.2914		15.3802	8.40385	1.83013	medium		1.83013			3.84226	3.0344	1.26623	small	1.26623
				7.66143	7.97756	0.960372	medium		0.960372			7.53314	3.89693	1.93309	medium		1.93309			8.97869	3.01619	2.97683	medium		2.97683			35.489	20.4039	1.73932	large			1.73932		4.1279	2.10572	1.96033	medium		1.96033
				8.04404	3.2746	2.45649	medium		2.45649			53.5162	34.828	1.53659	large			1.53659		42.9722	34.4807	1.24627	large			1.24627		8.16405	4.22279	1.93333	medium		1.93333			3.67782	2.30741	1.59392	small	1.59392
				9.05651	3.35891	2.69627	medium		2.69627			7.53278	5.06984	1.4858	medium		1.4858			3.00352	2.09198	1.43573	small	1.43573				16.272	9.98705	1.62931	large			1.62931		4.36572	1.14041	3.8282	medium		3.8282
				36.0723	16.2402	2.22117	large			2.22117		6.12341	2.73679	2.23744	medium		2.23744			2.13264	1.64819	1.29393	small	1.29393				5.44824	3.40924	1.59808	medium		1.59808			7.34913	5.14012	1.42976	medium		1.42976
				4.80819	3.64458	1.31927	medium		1.31927			4.40324	2.20415	1.99771	medium		1.99771			4.26528	3.12545	1.36469	medium		1.36469			6.58649	2.43308	2.70706	medium		2.70706			4.68153	10.3134	0.453929	medium		0.453929
				50.6603	26.2933	1.92674	large			1.92674		3.51929	2.51911	1.39704	small	1.39704				8.94496	4.28163	2.08915	medium		2.08915			1.97171	1.23903	1.59133	small	1.59133				4.89	3.51956	1.38938	medium		1.38938
				5.28105	3.82714	1.37989	medium		1.37989			10.3181	6.36801	1.62031	medium		1.62031			6.0968	2.6426	2.30712	medium		2.30712			12.2843	6.80384	1.8055	medium		1.8055			6.22882	3.03942	2.04935	medium		2.04935
				10.2071	5.89598	1.7312	medium		1.7312			34.2519	21.5587	1.58877	large			1.58877		3.5934	3.31225	1.08488	small	1.08488				5.47364	3.39026	1.61452	medium		1.61452			2.73255	1.38726	1.96975	small	1.96975
				18.0499	10.3017	1.75212	large			1.75212		23.4199	12.342	1.89757	large			1.89757		8.10843	5.03247	1.61122	medium		1.61122			1.49666	1.29649	1.1544	small	1.1544				2.89372	1.86288	1.55335	small	1.55335
				5.46291	1.99788	2.73436	medium		2.73436			6.95784	3.51387	1.98011	medium		1.98011			26.4131	17.8456	1.48009	large			1.48009		9.99716	6.45478	1.5488	medium		1.5488			1.95496	1.38073	1.41589	small	1.41589
				14.7565	9.66429	1.52691	medium		1.52691			1.01064	1.18629	0.851933	small	0.851933				6.91816	5.12709	1.34934	medium		1.34934			10.0128	5.86616	1.70688	medium		1.70688			30.9049	23.7143	1.30322	large			1.30322
				14.21	6.16043	2.30666	medium		2.30666			4.22774	2.87543	1.4703	medium		1.4703			5.10491	3.63151	1.40572	medium		1.40572			3.52325	1.4347	2.45574	small	2.45574				8.76786	6.38188	1.37387	medium		1.37387
				9.60303	4.47612	2.14539	medium		2.14539			2.48856	1.80892	1.37571	small	1.37571				7.97907	3.63823	2.19312	medium		2.19312			10.835	6.74205	1.60708	medium		1.60708			3.19866	2.01992	1.58356	small	1.58356
				13.5244	3.26369	4.14392	medium		4.14392			2.93932	1.36688	2.1504	small	2.1504				37.516	25.9333	1.44663	large			1.44663		1.85695	1.57237	1.18099	small	1.18099				27.2358	26.2771	1.03649	large			1.03649
				11.7196	6.22532	1.88257	medium		1.88257			3.86239	1.75359	2.20256	small	2.20256				5.44843	1.18059	4.615	medium		4.615			2.82744	1.96099	1.44184	small	1.44184				2.76435	1.56838	1.76255	small	1.76255
				2.80582	2.28658	1.22708	small	1.22708				3.18373	1.91472	1.66276	small	1.66276				1.89743	1.53099	1.23935	small	1.23935				8.73192	6.31223	1.38333	medium		1.38333			6.48457	4.85866	1.33464	medium		1.33464
				4.99742	2.02153	2.4721	medium		2.4721			29.4331	21.4201	1.37409	large			1.37409		12.4387	8.32458	1.49421	medium		1.49421			2.8312	2.07318	1.36563	small	1.36563				46.7186	33.7126	1.38579	large			1.38579
				7.62183	3.44503	2.21241	medium		2.21241			4.72338	1.00509	4.69945	medium		4.69945			6.24473	2.97346	2.10016	medium		2.10016			38.4995	21.8934	1.7585	large			1.7585		3.52209	1.71739	2.05084	small	2.05084
				7.28204	3.53541	2.05975	medium		2.05975			34.2681	19.8641	1.72513	large			1.72513		6.41402	4.85789	1.32033	medium		1.32033			26.1763	18.4017	1.42249	large			1.42249		2.78636	1.45097	1.92034	small	1.92034
				14.9964	7.12661	2.10428	medium		2.10428			5.89803	2.63343	2.23968	medium		2.23968			31.0952	20.8771	1.48944	large			1.48944		5.8565	3.23904	1.8081	medium		1.8081			3.76235	1.81271	2.07554	small	2.07554
				4.10835	2.18711	1.87843	medium		1.87843			3.45577	2.01079	1.71861	small	1.71861				3.35014	2.41918	1.38483	small	1.38483				1.44398	2.16478	0.667032	small	0.667032				14.2446	8.37772	1.7003	medium		1.7003
				9.87606	4.26566	2.31525	medium		2.31525			87.6123	67.1527	1.30467	large			1.30467		6.56721	4.77731	1.37467	medium		1.37467			5.12903	3.61032	1.42066	medium		1.42066			54.1223	47.2399	1.14569	large			1.14569
				11.5921	6.79666	1.70555	medium		1.70555			6.05845	3.2062	1.88961	medium		1.88961			4.60881	2.07367	2.22254	medium		2.22254			2.29688	1.21681	1.88763	small	1.88763				3.82758	3.71122	1.03135	small	1.03135
				5.66366	3.45049	1.6414	medium		1.6414			6.42022	4.06901	1.57783	medium		1.57783			1.82223	1.6488	1.10519	small	1.10519				3.66655	2.52034	1.45478	small	1.45478				3.2185	5.12758	0.627685	small	0.627685
				10.0427	5.54723	1.8104	medium		1.8104			4.26938	2.17192	1.96571	medium		1.96571			5.32371	2.45397	2.16943	medium		2.16943			6.29142	3.75124	1.67716	medium		1.67716			1.97589	1.65668	1.19268	small	1.19268
				3.23263	1.13177	2.85627	small	2.85627				2.12643	1.1194	1.89961	small	1.89961				28.1393	18.9945	1.48145	large			1.48145		14.9164	7.60221	1.96211	medium		1.96211			2.23491	1.1083	2.01652	small	2.01652
				27.9697	16.706	1.67423	large			1.67423		45.3955	31.3913	1.44612	large			1.44612		3.77723	2.29526	1.64567	small	1.64567				62.4818	46.3396	1.34835	large			1.34835		2.38901	1.01648	2.35027	small	2.35027
				3.82243	2.79242	1.36886	small	1.36886				5.68269	3.22809	1.76039	medium		1.76039			26.0305	20.8826	1.24652	large			1.24652		4.1024	2.74961	1.49199	medium		1.49199			3.23834	1.09124	2.96758	small	2.96758
				6.47952	3.25095	1.99312	medium		1.99312			9.03762	5.63046	1.60513	medium		1.60513			7.12923	4.07408	1.7499	medium		1.7499			37.3174	25.4327	1.4673	large			1.4673		18.4027	16.5668	1.11082	large			1.11082
				8.59701	2.72995	3.14915	medium		3.14915			9.18261	4.84548	1.89509	medium		1.89509			5.17918	2.25192	2.2999	medium		2.2999			3.27584	2.45584	1.3339	small	1.3339				4.23635	1.9266	2.19887	medium		2.19887
				4.63415	3.25398	1.42415	medium		1.42415			4.32178	2.62856	1.64416	medium		1.64416			12.8327	7.68789	1.66921	medium		1.66921			1.72494	1.93497	0.891453	small	0.891453				2.43358	1.98531	1.2258	small	1.2258
				6.16459	3.1624	1.94934	medium		1.94934			15.704	9.96762	1.57551	medium		1.57551			6.13548	3.81098	1.60995	medium		1.60995			5.26386	2.36478	2.22594	medium		2.22594			2.96411	2.08164	1.42393	small	1.42393
				5.77646	3.81622	1.51366	medium		1.51366			10.1965	4.62537	2.20447	medium		2.20447			5.9337	2.72257	2.17945	medium		2.17945			8.00287	5.46453	1.46451	medium		1.46451			7.68805	5.65488	1.35954	medium		1.35954
				4.39841	2.45095	1.79458	medium		1.79458			1.42839	1.20575	1.18465	small	1.18465				7.33039	5.36577	1.36614	medium		1.36614			20.9394	13.3757	1.56548	large			1.56548		4.07762	2.2462	1.81534	medium		1.81534
				4.27686	2.65353	1.61177	medium		1.61177			4.0867	2.45831	1.6624	medium		1.6624			42.7782	29.5252	1.44887	large			1.44887		10.6632	6.55072	1.62779	medium		1.62779			36.9981	24.6651	1.50002	large			1.50002
				5.2304	1.40106	3.73317	medium		3.73317			11.2685	4.96161	2.27113	medium		2.27113			8.60701	5.35234	1.60808	medium		1.60808			60.9522	45.8182	1.33031	large			1.33031		1.59947	1.08221	1.47796	small	1.47796
				4.78701	1.00076	4.78338	medium		4.78338			5.62994	1.74386	3.22843	medium		3.22843			3.30682	1.80874	1.82825	small	1.82825				20.2195	10.9199	1.85162	large			1.85162		6.69683	5.26254	1.27255	medium		1.27255
				6.05363	4.35845	1.38894	medium		1.38894			2.51476	2.00289	1.25557	small	1.25557				13.5646	8.62736	1.57228	medium		1.57228			10.962	5.81467	1.88523	medium		1.88523			2.87632	1.13991	2.5233	small	2.5233
				13.6386	5.34102	2.55356	medium		2.55356			3.32657	2.28867	1.4535	small	1.4535				16.1126	12.2387	1.31652	large			1.31652		5.86371	3.14257	1.8659	medium		1.8659			50.6206	42.742	1.18433	large			1.18433
				4.23404	2.60258	1.62686	medium		1.62686			6.28204	3.63791	1.72683	medium		1.72683			2.6634	1.91617	1.38996	small	1.38996				7.15655	4.21087	1.69954	medium		1.69954			38.2451	30.192	1.26673	large			1.26673
				5.2304	4.98923	1.04834	medium		1.04834			5.08693	2.93501	1.73319	medium		1.73319			26.5214	10.4074	2.54832	large			2.54832		6.79313	3.58268	1.8961	medium		1.8961			8.93609	5.52845	1.61638	medium		1.61638
				18.8345	12.8534	1.46533	large			1.46533		11.5685	5.6639	2.0425	medium		2.0425			6.44249	1.28681	5.00655	medium		5.00655			7.04242	3.42224	2.05784	medium		2.05784			6.25111	4.10056	1.52445	medium		1.52445
				33.9267	26.5553	1.27759	large			1.27759		18.9933	9.83506	1.93118	large			1.93118		4.21576	3.43373	1.22775	medium		1.22775			2.39879	1.2748	1.88169	small	1.88169				5.72547	3.54465	1.61524	medium		1.61524
				7.12688	1.13783	6.26356	medium		6.26356			5.02843	1.2404	4.05387	medium		4.05387			4.15449	1.67932	2.47391	medium		2.47391			7.28606	4.91873	1.48129	medium		1.48129			1.93078	1.78963	1.07887	small	1.07887
				3.63734	2.4	1.51556	small	1.51556				3.04412	1.03185	2.95017	small	2.95017				1.78912	1.81606	0.985163	small	0.985163				2.0454	1.32359	1.54535	small	1.54535				2.64422	1.95019	1.35588	small	1.35588
				19.8424	12.8152	1.54835	large			1.54835		4.69538	2.04363	2.29757	medium		2.29757			7.57581	1.92472	3.93606	medium		3.93606			6.59056	3.2114	2.05224	medium		2.05224			3.91102	2.43133	1.60859	small	1.60859
				13.3546	7.35466	1.81579	medium		1.81579			4.6193	2.40602	1.91989	medium		1.91989			8.70171	6.48044	1.34277	medium		1.34277			5.62007	2.66343	2.11009	medium		2.11009			5.94045	3.80254	1.56224	medium		1.56224
				13.6838	8.80485	1.55411	medium		1.55411			8.63135	4.36452	1.97762	medium		1.97762			10.4425	6.06717	1.72116	medium		1.72116			3.33605	2.24392	1.48671	small	1.48671				2.21316	1.36719	1.61877	small	1.61877
				19.4353	9.9251	1.9582	large			1.9582		3.76729	3.20802	1.17433	small	1.17433				5.66661	2.74088	2.06744	medium		2.06744			2.81051	1.73226	1.62245	small	1.62245				7.65135	6.97441	1.09706	medium		1.09706
				15.8643	8.59196	1.84641	medium		1.84641			5.14758	2.72342	1.89012	medium		1.89012			6.21254	4.0869	1.52011	medium		1.52011			4.2871	2.06885	2.07222	medium		2.07222			3.10055	2.52465	1.22811	small	1.22811
				26.8505	22.6469	1.18562	large			1.18562		7.2026	5.92536	1.21555	medium		1.21555			41.4319	34.0504	1.21678	large			1.21678		7.11861	3.88674	1.83151	medium		1.83151			4.82721	3.83113	1.26	medium		1.26
				7.85619	3.35588	2.34102	medium		2.34102			16.1193	6.76081	2.38422	large			2.38422		29.602	19.5249	1.51611	large			1.51611		31.1627	24.6408	1.26468	large			1.26468		6.81534	4.55913	1.49488	medium		1.49488
				8.70014	3.51903	2.47231	medium		2.47231			8.95399	6.0342	1.48387	medium		1.48387			4.50358	3.72979	1.20746	medium		1.20746			10.777	5.78486	1.86297	medium		1.86297			2.71053	1.67073	1.62237	small	1.62237
				2.62118	1.02866	2.54816	small	2.54816				5.20788	3.07669	1.69269	medium		1.69269			8.01342	5.17959	1.54712	medium		1.54712			4.26138	5.03743	0.845944	medium		0.845944			1.77423	1.23122	1.44103	small	1.44103
				10.4129	5.12146	2.03319	medium		2.03319			5.16912	2.28137	2.2658	medium		2.2658			41.0995	32.0194	1.28358	large			1.28358		7.46165	4.68404	1.593	medium		1.593			9.58811	4.63539	2.06846	medium		2.06846
				6.22261	10.7809	0.577188	medium		0.577188			1.13805	3.05966	0.371951	small	0.371951				14.6862	10.6357	1.38084	medium		1.38084			11.2119	5.44827	2.05789	medium		2.05789			6.00161	2.56881	2.33634	medium		2.33634
				9.95249	7.38135	1.34833	medium		1.34833			10.9738	6.07129	1.8075	medium		1.8075			9.9972	7.34299	1.36146	medium		1.36146			6.75111	4.35721	1.54941	medium		1.54941			2.43603	1.09224	2.2303	small	2.2303
				1.93055	1.66247	1.16125	small	1.16125				18.7862	12.6448	1.48568	large			1.48568		3.12917	2.25008	1.39069	small	1.39069				4.40249	3.62224	1.2154	medium		1.2154			5.08242	3.58128	1.41916	medium		1.41916
				1.30622	2.32055	0.562893	small	0.562893				3.2853	1.32614	2.47734	small	2.47734				2.128	2.60719	0.816203	small	0.816203				5.16101	1.86668	2.76481	medium		2.76481			5.70019	2.78505	2.04671	medium		2.04671
				12.0856	4.31296	2.80216	medium		2.80216			18.1416	10.2485	1.77017	large			1.77017		6.21595	4.47453	1.38918	medium		1.38918			8.55287	4.4087	1.94	medium		1.94			2.24061	2.32848	0.962264	small	0.962264
				7.85204	2.09977	3.73947	medium		3.73947			7.07735	3.46644	2.04168	medium		2.04168			9.2464	5.19424	1.78013	medium		1.78013			4.03969	1.35231	2.98725	medium		2.98725			2.65237	1.63862	1.61866	small	1.61866
				10.0285	4.44094	2.25818	medium		2.25818			5.43219	3.2062	1.69428	medium		1.69428			6.64241	5.28092	1.25781	medium		1.25781			7.23087	5.1312	1.4092	medium		1.4092			2.98993	2.14686	1.3927	small	1.3927
				1.68238	2.38484	0.705449	small	0.705449				7.20763	3.2214	2.23742	medium		2.23742			6.8804	2.4442	2.81499	medium		2.81499			8.86895	6.05586	1.46452	medium		1.46452			4.00506	2.25122	1.77906	medium		1.77906
				25.7565	10.9841	2.34489	large			2.34489		2.62314	2.06612	1.2696	small	1.2696				9.23061	6.64892	1.38829	medium		1.38829			3.38402	1.62819	2.07839	small	2.07839				11.5879	8.88847	1.3037	medium		1.3037
				2.88777	2.35451	1.22648	small	1.22648				7.91608	4.40222	1.7982	medium		1.7982			8.12143	4.31704	1.88125	medium		1.88125			4.30842	2.47915	1.73786	medium		1.73786			4.31353	4.3178	0.999012	medium		0.999012
				6.66691	16.2456	0.410382	medium		0.410382			5.79323	3.87504	1.49501	medium		1.49501			4.09878	2.77262	1.47831	medium		1.47831			6.10077	2.62007	2.32848	medium		2.32848			2.08108	1.57088	1.32478	small	1.32478
				7.3953	1.48961	4.96458	medium		4.96458			4.67098	3.06149	1.52572	medium		1.52572			9.4847	3.20603	2.9584	medium		2.9584			6.10861	3.85856	1.58313	medium		1.58313			3.78545	1.99283	1.89953	small	1.89953
				5.36576	2.60925	2.05644	medium		2.05644			2.50219	2.64863	0.944714	small	0.944714				2.88902	1.79836	1.60647	small	1.60647				6.29487	3.41574	1.8429	medium		1.8429			8.15008	6.32468	1.28862	medium		1.28862
				9.36914	6.12767	1.52899	medium		1.52899			3.64383	1.83324	1.98764	small	1.98764				3.75557	1.18242	3.17616	small	3.17616				4.28271	3.2114	1.33359	medium		1.33359			4.75655	3.64399	1.30531	medium		1.30531
				11.8789	7.01198	1.69409	medium		1.69409			4.10106	2.48993	1.64706	medium		1.64706			3.95456	3.16697	1.24869	small	1.24869				3.23633	1.48619	2.17761	small	2.17761				7.89189	5.23946	1.50624	medium		1.50624
				4.63415	2.6323	1.7605	medium		1.7605			1.70868	1.70069	1.0047	small	1.0047				28.1972	23.7211	1.1887	large			1.1887		7.59962	3.66669	2.07261	medium		2.07261			2.99346	1.34912	2.21882	small	2.21882
				6.38974	6.42123	0.995096	medium		0.995096			9.04264	5.91502	1.52876	medium		1.52876			13.7989	8.06453	1.71106	medium		1.71106			2.49067	2.03036	1.22671	small	1.22671				8.04164	5.43413	1.47984	medium		1.47984
				7.2139	4.74177	1.52135	medium		1.52135			4.83643	2.12997	2.27066	medium		2.27066			3.68438	3.17979	1.15869	small	1.15869				5.5768	3.32251	1.67849	medium		1.67849			2.07673	1.27888	1.62386	small	1.62386
				6.13743	2.95375	2.07784	medium		2.07784			4.20729	2.10929	1.99464	medium		1.99464			11.2509	6.17582	1.82177	medium		1.82177			7.32839	5.29543	1.38391	medium		1.38391			3.68081	2.79709	1.31595	small	1.31595
				5.52553	1.63093	3.38795	medium		3.38795			2.01984	1.42646	1.41598	small	1.41598				58.4191	54.9757	1.06264	large			1.06264		10.8482	6.98704	1.55262	medium		1.55262			2.01068	1.96122	1.02522	small	1.02522
				1.745	1.27854	1.36483	small	1.36483				12.657	7.60416	1.66449	medium		1.66449			16.3697	12.1575	1.34647	large			1.34647		2.75062	1.46993	1.87126	small	1.87126				5.39498	2.16793	2.48854	medium		2.48854
				23.5681	14.3466	1.64276	large			1.64276		9.45465	5.63654	1.67739	medium		1.67739			13.7342	8.17014	1.68102	medium		1.68102			4.73832	2.67481	1.77146	medium		1.77146			5.37513	4.46982	1.20254	medium		1.20254
				12.7624	4.22017	3.02416	medium		3.02416			3.57098	1.34195	2.66104	small	2.66104				4.04864	1.88687	2.14569	medium		2.14569			9.54218	5.42009	1.76052	medium		1.76052			35.577	28.3286	1.25587	large			1.25587
				3.65713	2.5025	1.46139	small	1.46139				2.89231	1.09387	2.64412	small	2.64412				31.4369	18.6844	1.68252	large			1.68252		5.41468	2.29703	2.35725	medium		2.35725			38.4117	28.2769	1.35841	large			1.35841
				22.6054	20.8873	1.08225	large			1.08225		19.692	9.85087	1.99902	large			1.99902		6.65077	3.77619	1.76124	medium		1.76124			34.8032	21.4939	1.61921	large			1.61921		2.707	2.75695	0.981882	small	0.981882
				1.54978	1.47202	1.05282	small	1.05282				6.59105	4.33959	1.51882	medium		1.51882			4.78212	2.85747	1.67355	medium		1.67355			6.11676	1.60651	3.80748	medium		3.80748			6.00759	3.53311	1.70037	medium		1.70037
				23.0943	11.5166	2.00531	large			2.00531		2.57541	1.08596	2.37155	small	2.37155				5.20704	2.76041	1.88633	medium		1.88633			1.05014	1.13009	0.929253	small	0.929253				2.72738	2.42632	1.12408	small	1.12408
				4.96335	3.71372	1.33649	medium		1.33649			4.49476	2.73801	1.64162	medium		1.64162			4.28602	3.0931	1.38567	medium		1.38567			2.84782	2.4011	1.18605	small	1.18605				3.59547	2.08565	1.72391	small	1.72391
				4.78563	1.60061	2.98989	medium		2.98989			9.92085	3.74796	2.647	medium		2.647			6.41432	3.06563	2.09233	medium		2.09233			30.9607	17.7578	1.7435	large			1.7435		4.67175	2.80261	1.66693	medium		1.66693
				6.45973	3.54996	1.81966	medium		1.81966			7.50874	2.88637	2.60145	medium		2.60145			4.37112	4.25172	1.02808	medium		1.02808			5.55265	2.55449	2.17369	medium		2.17369			3.75338	2.20707	1.70062	small	1.70062
				1.86701	1.01713	1.83556	small	1.83556				4.14699	1.19602	3.46734	medium		3.46734			2.64483	2.78788	0.948689	small	0.948689				8.80623	4.89597	1.79867	medium		1.79867			3.42398	1.36367	2.51085	small	2.51085
				38.914	25.5557	1.52271	large			1.52271		2.49394	1.00023	2.49337	small	2.49337				7.99764	5.52815	1.44671	medium		1.44671			5.74801	4.21466	1.36381	medium		1.36381			1.2793	1.09275	1.17072	small	1.17072
				39.688	20.5252	1.93362	large			1.93362		30.7064	21.8311	1.40655	large			1.40655		12.2357	7.47424	1.63705	medium		1.63705			8.20826	4.14095	1.98222	medium		1.98222			4.87505	3.26269	1.49418	medium		1.49418
				23.5078	9.64549	2.43718	large			2.43718		4.43267	2.50999	1.76601	medium		1.76601			2.17226	2.23971	0.969885	small	0.969885				3.91583	2.15448	1.81753	small	1.81753				4.7878	2.03397	2.35392	medium		2.35392
				4.5126	1.90751	2.36571	medium		2.36571			7.22449	4.28304	1.68677	medium		1.68677			16.591	9.65717	1.718	large			1.718		3.06951	1.96424	1.5627	small	1.5627				9.21821	3.46387	2.66124	medium		2.66124
				43.2373	17.1208	2.52542	large			2.52542		4.48687	1.17595	3.81551	medium		3.81551			2.50248	1.35151	1.85161	small	1.85161				3.03471	2.97942	1.01856	small	1.01856				3.69277	1.97025	1.87426	small	1.87426
				60.4866	32.1741	1.87998	large			1.87998		4.80305	2.19746	2.18573	medium		2.18573			18.4801	13.8051	1.33864	large			1.33864		5.86873	3.14853	1.86396	medium		1.86396			3.88982	3.08909	1.25921	small	1.25921
				6.77281	3.13632	2.15948	medium		2.15948			8.57967	5.39332	1.59079	medium		1.59079			3.25761	3.48501	0.93475	small	0.93475				11.9209	6.30736	1.89	medium		1.89			1.05073	1.01799	1.03216	small	1.03216
				3.76073	2.6329	1.42836	small	1.42836				10.5855	6.4124	1.65079	medium		1.65079			11.2973	6.78016	1.66623	medium		1.66623			3.59035	1.1057	3.24713	small	3.24713				3.11468	1.17553	2.6496	small	2.6496
				14.5134	6.38241	2.27397	medium		2.27397			2.98167	2.88637	1.03302	small	1.03302				1.72505	2.41368	0.714698	small	0.714698				4.18425	1.8721	2.23506	medium		2.23506			3.05788	1.55634	1.9648	small	1.9648
				25.2763	10.3982	2.43084	large			2.43084		6.80064	3.77776	1.80018	medium		1.80018			6.8965	3.9819	1.73196	medium		1.73196			8.28383	4.05965	2.04053	medium		2.04053			6.10733	3.8512	1.58582	medium		1.58582
				5.79626	3.1345	1.84918	medium		1.84918			1.13302	3.28707	0.344691	small	0.344691				4.32068	4.78219	0.903493	medium		0.903493			4.70822	2.52468	1.86488	medium		1.86488			2.52979	2.34002	1.0811	small	1.0811
				15.7087	5.56725	2.82163	medium		2.82163			7.95592	4.49829	1.76865	medium		1.76865			54.9665	50.3192	1.09236	large			1.09236		8.84323	3.20165	2.76209	medium		2.76209			9.42286	5.61726	1.67749	medium		1.67749
				8.05417	3.66399	2.1982	medium		2.1982			2.23733	1.25743	1.77929	small	1.77929				6.62261	5.03308	1.31582	medium		1.31582			6.69091	3.79189	1.76453	medium		1.76453			2.99455	1.58744	1.8864	small	1.8864
				19.8925	5.31918	3.73978	large			3.73978		17.2315	11.9535	1.44155	large			1.44155		71.6977	59.7811	1.19934	large			1.19934		3.84183	3.60544	1.06556	small	1.06556				1.57066	1.11934	1.4032	small	1.4032
				10.9599	4.1116	2.6656	medium		2.6656			5.52837	1.25013	4.42223	medium		4.42223			11.0457	10.1754	1.08553	medium		1.08553			7.9411	4.67645	1.6981	medium		1.6981			4.28174	2.43635	1.75744	medium		1.75744
				10.2462	4.35118	2.35482	medium		2.35482			5.82984	2.11659	2.75435	medium		2.75435			6.00952	5.08436	1.18196	medium		1.18196			4.94245	3.78214	1.30679	medium		1.30679			3.00787	1.1384	2.64219	small	2.64219
				27.7326	9.72555	2.85152	large			2.85152		2.00154	2.02903	0.98645	small	0.98645				3.7698	3.03267	1.24306	small	1.24306				5.16289	4.52198	1.14173	medium		1.14173			4.2464	2.67116	1.58972	medium		1.58972
				12.9867	25.045	0.518533	medium		0.518533			16.4408	9.87337	1.66517	large			1.66517		28.1734	30.8285	0.913876	large			0.913876		42.2821	26.2495	1.61078	large			1.61078		5.21641	2.3631	2.20744	medium		2.20744
				5.66227	2.8743	1.96997	medium		1.96997			3.73714	1.05799	3.5323	small	3.5323				5.16742	3.286	1.57256	medium		1.57256			7.95239	3.02874	2.62564	medium		2.62564			2.59095	1.84733	1.40253	small	1.40253
				36.0617	26.4886	1.36141	large			1.36141		3.4651	2.04302	1.69607	small	1.69607				3.13165	1.19158	2.62815	small	2.62815				1.8513	1.0786	1.7164	small	1.7164				31.1234	20.8199	1.49489	large			1.49489
				2.33066	2.31569	1.00646	small	1.00646				3.796	1.55476	2.44153	small	2.44153				20.0656	14.2001	1.41306	large			1.41306		2.09746	2.45422	0.854633	small	0.854633				22.9655	16.8869	1.35996	large			1.35996
				54.3685	29.1524	1.86498	large			1.86498		2.94004	1.18568	2.47963	small	2.47963				4.97678	3.42396	1.45352	medium		1.45352			3.7324	2.25367	1.65614	small	1.65614				2.58823	1.97427	1.31098	small	1.31098
				11.9401	4.69082	2.54542	medium		2.54542			2.86611	2.1774	1.3163	small	1.3163				11.3205	6.96269	1.62589	medium		1.62589			33.7722	19.927	1.6948	large			1.6948		4.42605	2.49505	1.77393	medium		1.77393
				8.60852	3.17574	2.71071	medium		2.71071			3.88321	1.99133	1.95005	small	1.95005				10.579	7.86309	1.3454	medium		1.3454			10.7375	5.1919	2.06812	medium		2.06812			7.42305	4.59274	1.61626	medium		1.61626
				5.57295	2.04458	2.72572	medium		2.72572			4.339	2.87725	1.50804	medium		1.50804			46.8612	29.3787	1.59507	large			1.59507		42.1676	29.443	1.43218	large			1.43218		18.6337	13.0844	1.42412	large			1.42412
				9.12097	3.83624	2.37758	medium		2.37758			2.36689	1.01421	2.33373	small	2.33373				7.75996	9.09678	0.853044	medium		0.853044			1.70361	1.21573	1.40131	small	1.40131				3.50932	1.54128	2.27688	small	2.27688
				5.93162	2.31933	2.55747	medium		2.55747			2.41319	1.3237	1.82306	small	1.82306				11.2809	5.09779	2.21291	medium		2.21291			18.0972	8.17078	2.21487	large			2.21487		2.93748	1.66722	1.76191	small	1.76191
				21.2586	7.72525	2.75184	large			2.75184		28.7171	17.6058	1.63111	large			1.63111		11.7842	7.74527	1.52146	medium		1.52146			7.88717	5.15884	1.52886	medium		1.52886			3.63325	2.60342	1.39557	small	1.39557
				6.26727	2.68021	2.33835	medium		2.33835			8.30332	2.98913	2.77784	medium		2.77784			21.4657	14.3258	1.49839	large			1.49839		8.59771	3.64013	2.36192	medium		2.36192			1.26136	1.17453	1.07393	small	1.07393
				6.21432	3.29462	1.8862	medium		1.8862			3.6485	3.41658	1.06788	small	1.06788				10.7805	5.69297	1.89365	medium		1.89365			3.50475	3.01628	1.16194	small	1.16194				24.3263	20.1481	1.20738	large			1.20738
				3.28557	1.34162	2.44896	small	2.44896				29.2931	17.244	1.69874	large			1.69874		24.9863	22.6205	1.10459	large			1.10459		4.04126	1.46668	2.75539	medium		2.75539			24.8541	10.5677	2.35189	large			2.35189
				6.40033	3.0514	2.0975	medium		2.0975			3.22177	1.91168	1.68531	small	1.68531				6.67584	5.08253	1.31349	medium		1.31349			4.82863	2.46506	1.95883	medium		1.95883			1.11541	1.8659	0.59779	small	0.59779
				5.28841	3.86232	1.36923	medium		1.36923			10.4513	6.07859	1.71936	medium		1.71936			5.4441	3.84883	1.41448	medium		1.41448			5.16352	2.52413	2.04566	medium		2.04566			2.92361	1.20664	2.42295	small	2.42295
				15.4122	6.62441	2.32657	medium		2.32657			7.12436	3.18857	2.23435	medium		2.23435			5.65393	5.1161	1.10512	medium		1.10512			11.2564	5.85966	1.92101	medium		1.92101			1.40161	1.99785	0.701559	small	0.701559
				4.87127	1.72555	2.82302	medium		2.82302			6.55947	3.2968	1.98965	medium		1.98965			6.32767	7.46141	0.848052	medium		0.848052			1.81493	1.75177	1.03605	small	1.03605				8.89016	4.82153	1.84385	medium		1.84385
				16.9546	7.5815	2.23631	large			2.23631		57.5677	39.3257	1.46387	large			1.46387		10.9733	10.2285	1.07281	medium		1.07281			3.19557	1.29703	2.46376	small	2.46376				3.90966	1.84081	2.12388	small	2.12388
				4.14564	4.21531	0.983472	medium		0.983472			1.3864	1.54625	0.896623	small	0.896623				1.46725	1.32405	1.10816	small	1.10816				30.7478	17.5188	1.75513	large			1.75513		16.2624	5.13008	3.17001	large			3.17001
				3.25519	1.20212	2.70786	small	2.70786				7.24531	2.88333	2.51283	medium		2.51283			3.92547	1.92289	2.04145	small	2.04145				10.7231	5.85044	1.83287	medium		1.83287			1.67421	1.11281	1.50448	small	1.50448
				34.9	12.111	2.88168	large			2.88168		4.7241	2.18165	2.16538	medium		2.16538			12.4313	6.73865	1.84477	medium		1.84477			17.2425	9.8212	1.75564	large			1.75564		17.755	9.12779	1.94516	large			1.94516
				1.90615	1.57877	1.20736	small	1.20736				21.3017	11.6835	1.82323	large			1.82323		3.45537	2.62123	1.31822	small	1.31822				6.17164	2.85964	2.15819	medium		2.15819			10.5399	5.07088	2.07852	medium		2.07852
				11.1593	4.56103	2.44665	medium		2.44665			1.33077	1.39302	0.955312	small	0.955312				1.93333	2.25436	0.857599	small	0.857599				8.32459	6.29868	1.32164	medium		1.32164			5.32051	2.94459	1.80687	medium		1.80687
				5.74699	2.10402	2.73144	medium		2.73144			27.8227	18.1707	1.53119	large			1.53119		38.3882	38.2154	1.00452	large			1.00452		5.30933	3.46073	1.53417	medium		1.53417			27.6141	24.5672	1.12402	large			1.12402
				8.2213	3.21941	2.55367	medium		2.55367			5.90772	2.2607	2.61323	medium		2.61323			2.00699	1.17205	1.71238	small	1.71238				3.98011	2.39785	1.65987	small	1.65987				3.12419	2.05605	1.51951	small	1.51951
				4.14564	2.03063	2.04156	medium		2.04156			3.53939	2.22725	1.58913	small	1.58913				3.30867	2.75065	1.20287	small	1.20287				3.09021	2.45855	1.25692	small	1.25692				13.317	9.55776	1.39332	medium		1.39332
				7.26086	3.37346	2.15235	medium		2.15235			10.5285	7.03625	1.49632	medium		1.49632			4.81399	3.72125	1.29365	medium		1.29365			8.66481	4.18593	2.06998	medium		2.06998			4.94544	3.39112	1.45835	medium		1.45835
				6.13559	2.20045	2.78833	medium		2.78833			2.65042	1.05009	2.524	small	2.524				4.39588	2.06695	2.12675	medium		2.12675			9.33585	5.27049	1.77134	medium		1.77134			23.0438	13.9037	1.65739	large			1.65739
				40.4518	15.2352	2.65516	large			2.65516		8.31768	2.94656	2.82284	medium		2.82284			3.39688	5.22293	0.650377	small	0.650377				10.878	5.67808	1.91578	medium		1.91578			32.6574	18.676	1.74863	large			1.74863
				3.26578	1.04018	3.13962	small	3.13962				4.18827	2.40663	1.74031	medium		1.74031			5.65114	2.73722	2.06456	medium		2.06456			2.00809	1.84175	1.09032	small	1.09032				3.04456	1.48559	2.04939	small	2.04939
				11.8236	1.84807	6.39784	medium		6.39784			2.2079	1.22277	1.80566	small	1.80566				31.4948	12.6721	2.48535	large			2.48535		4.48997	2.90354	1.54638	medium		1.54638			12.6582	8.20362	1.543	medium		1.543
				1.0424	1.82926	0.569845	small	0.569845				20.7267	13.0109	1.59303	large			1.59303		8.73204	2.58521	3.37769	medium		3.37769			7.48674	5.21033	1.4369	medium		1.4369			15.3598	9.92051	1.54829	medium		1.54829
				2.11886	2.02396	1.04689	small	1.04689				6.50886	3.99361	1.62982	medium		1.62982			14.983	10.2548	1.46107	medium		1.46107			8.53312	4.419	1.93101	medium		1.93101			4.63886	4.1131	1.12783	medium		1.12783
				58.4014	32.5307	1.79527	large			1.79527		1.89638	1.66542	1.13868	small	1.13868				10.8269	5.56722	1.94476	medium		1.94476			58.7654	37.0013	1.5882	large			1.5882		10.7109	7.63768	1.40237	medium		1.40237
				6.44914	1.48719	4.33647	medium		4.33647			1.99723	1.013	1.97161	small	1.97161				12.4576	9.156	1.36059	medium		1.36059			1.79643	1.12087	1.6027	small	1.6027				31.1324	15.5443	2.00282	large			2.00282
				33.9308	15.1703	2.23666	large			2.23666		1.50699	1.10603	1.36252	small	1.36252				4.84122	2.56568	1.88692	medium		1.88692			10.7657	6.4705	1.66382	medium		1.66382			10.7679	6.29307	1.71108	medium		1.71108
				7.92203	2.73601	2.89546	medium		2.89546			1.75749	1.42646	1.23206	small	1.23206				10.7626	6.90958	1.55763	medium		1.55763			4.02684	2.63254	1.52964	medium		1.52964			30.4837	23.2096	1.31341	large			1.31341
				7.57809	1.03108	7.34964	medium		7.34964			18.1926	11.4202	1.59301	large			1.59301		23.1901	14.0395	1.65177	large			1.65177		1.85193	1.02331	1.80974	small	1.80974				4.80873	2.67818	1.79552	medium		1.79552
				9.4405	4.20804	2.24345	medium		2.24345			3.95284	1.50977	2.61818	small	2.61818				8.46124	7.03533	1.20268	medium		1.20268			5.75679	4.31981	1.33265	medium		1.33265			28.4178	20.7341	1.37058	large			1.37058
				10.4967	4.82729	2.17445	medium		2.17445			4.12259	2.23577	1.84393	medium		1.84393			14.0508	6.13981	2.28847	medium		2.28847			5.07007	2.08131	2.436	medium		2.436			7.09745	1.36468	5.20083	medium		5.20083
				11.0244	18.7542	0.587834	medium		0.587834			6.15033	1.94512	3.16192	medium		3.16192			6.09308	3.5082	1.73681	medium		1.73681			7.37135	3.52631	2.09039	medium		2.09039			3.27232	1.24527	2.6278	small	2.6278
				5.51954	1.5624	3.53274	medium		3.53274			3.44213	1.47754	2.32964	small	2.32964				3.54233	2.56263	1.3823	small	1.3823				8.29919	3.84826	2.15661	medium		2.15661			2.91573	1.33558	2.18312	small	2.18312
				2.06453	1.40713	1.4672	small	1.4672				5.53806	2.92893	1.89081	medium		1.89081			36.8763	27.4228	1.34473	large			1.34473		4.74365	2.55611	1.85581	medium		1.85581			6.68135	3.13826	2.129	medium		2.129
				22.3024	10.5856	2.10686	large			2.10686		8.91416	4.30918	2.06864	medium		2.06864			62.2972	52.7372	1.18128	large			1.18128		7.24372	4.70139	1.54076	medium		1.54076			3.28265	2.30189	1.42607	small	1.42607
				11.8121	2.4188	4.88346	medium		4.88346			7.66952	5.87793	1.3048	medium		1.3048			30.691	3.8476	7.97666	large			7.97666		8.70714	3.06289	2.84279	medium		2.84279			4.68915	2.02695	2.3134	medium		2.3134
				24.8771	11.4748	2.16798	large			2.16798		2.25635	1.58151	1.4267	small	1.4267				55.665	49.6954	1.12012	large			1.12012		3.19808	3.36262	0.951066	small	0.951066				5.33029	3.07203	1.7351	medium		1.7351
				8.24616	2.99924	2.74942	medium		2.74942			23.5261	4.79805	4.90326	large			4.90326		46.5161	35.3988	1.31406	large			1.31406		7.33968	4.56155	1.60903	medium		1.60903			5.12781	2.27881	2.25021	medium		2.25021
				8.93542	4.01759	2.22407	medium		2.22407			5.67264	3.45854	1.64019	medium		1.64019			7.41241	1.63232	4.54103	medium		4.54103			6.52158	3.62062	1.80123	medium		1.80123			3.97	3.01132	1.31836	small	1.31836
				7.83363	3.05808	2.56162	medium		2.56162			3.19234	1.33283	2.39517	small	2.39517				7.49256	4.10277	1.82622	medium		1.82622			4.04471	1.64608	2.45718	medium		2.45718			4.41383	2.06458	2.13788	medium		2.13788
				15.1682	4.63624	3.27165	medium		3.27165			23.4102	12.2751	1.90712	large			1.90712		5.73192	4.34084	1.32046	medium		1.32046			5.00893	2.2244	2.25181	medium		2.25181			3.59629	1.60952	2.23439	small	2.23439
				16.5177	7.11812	2.32051	large			2.32051		3.53329	3.3722	1.04777	small	1.04777				6.57278	3.3269	1.97565	medium		1.97565			35.9421	27.572	1.30357	large			1.30357		8.92495	6.23889	1.43054	medium		1.43054
				13.2247	5.78378	2.28652	medium		2.28652			5.38553	3.79296	1.41988	medium		1.41988			8.42472	6.41817	1.31264	medium		1.31264			36.7065	25.1763	1.45798	large			1.45798		3.79877	1.78261	2.13101	small	2.13101
				53.554	18.3606	2.91679	large			2.91679		3.74683	2.35677	1.58982	small	1.58982				6.24504	3.95565	1.57876	medium		1.57876			14.2962	8.34043	1.71408	medium		1.71408			15.1451	10.0369	1.50894	medium		1.50894
				10.0206	2.13738	4.68829	medium		4.68829			1.68643	2.48993	0.677302	small	0.677302				7.65163	4.32131	1.77068	medium		1.77068			2.26334	4.54637	0.497834	small	0.497834				5.40558	4.01075	1.34777	medium		1.34777
				5.77462	1.39196	4.14854	medium		4.14854			27.7768	17.2921	1.60633	large			1.60633		15.5351	11.0606	1.40454	medium		1.40454			5.96406	3.61411	1.65021	medium		1.65021			36.8557	23.5402	1.56565	large			1.56565
				3.37167	1.87233	1.80079	small	1.80079				8.94143	5.27415	1.69533	medium		1.69533			6.42856	3.83845	1.67478	medium		1.67478			4.0629	1.68023	2.41806	medium		2.41806			8.97632	5.34633	1.67897	medium		1.67897
				27.4384	10.6408	2.57861	large			2.57861		23.3886	13.0115	1.79754	large			1.79754		6.72412	11.6698	0.576199	medium		0.576199			11.7826	7.96048	1.48014	medium		1.48014			4.35947	2.98373	1.46108	medium		1.46108
				8.37416	3.00227	2.78927	medium		2.78927			1.86696	1.3085	1.42679	small	1.42679				8.08027	5.12221	1.5775	medium		1.5775			9.06994	4.11439	2.20444	medium		2.20444			2.72113	2.22613	1.22236	small	1.22236
				32.8654	7.43836	4.41837	large			4.41837		4.36341	2.64802	1.6478	medium		1.6478			14.8845	8.40638	1.77062	medium		1.77062			3.52921	4.89163	0.721478	small	0.721478				5.89969	3.35751	1.75716	medium		1.75716
				11.7339	6.01607	1.95042	medium		1.95042			34.6873	18.71	1.85394	large			1.85394		2.07724	2.28061	0.910829	small	0.910829				3.818	2.47481	1.54274	small	1.54274				42.1232	35.892	1.17361	large			1.17361
				4.90764	3.05019	1.60896	medium		1.60896			3.54836	1.57179	2.25754	small	2.25754				7.56931	4.95373	1.528	medium		1.528			12.967	7.89598	1.64222	medium		1.64222			8.77682	5.95441	1.474	medium		1.474
				8.44138	4.78362	1.76464	medium		1.76464			16.1325	11.7516	1.37279	large			1.37279		1.42083	6.95963	0.204153	small	0.204153				12.7302	8.6949	1.4641	medium		1.4641			7.37495	4.54157	1.62388	medium		1.62388
				6.55641	4.71145	1.39159	medium		1.39159			29.7485	18.8991	1.57407	large			1.57407		39.4221	35.0198	1.12571	large			1.12571		2.50039	1.55069	1.61244	small	1.61244				4.4834	2.55626	1.75389	medium		1.75389
				6.44177	2.76876	2.32659	medium		2.32659			10.5148	6.36436	1.65214	medium		1.65214			6.97665	3.95321	1.76481	medium		1.76481			11.0338	6.83202	1.61502	medium		1.61502			28.676	17.3856	1.64941	large			1.64941
				53.3975	25.859	2.06495	large			2.06495		7.19435	4.74029	1.5177	medium		1.5177			17.3078	12.3968	1.39615	large			1.39615		9.20917	4.98811	1.84623	medium		1.84623			31.6132	18.0514	1.75129	large			1.75129
				2.93657	1.68067	1.74727	small	1.74727				20.07	5.27658	3.80359	large			3.80359		17.0843	12.6245	1.35327	large			1.35327		9.49796	5.53391	1.71632	medium		1.71632			1.6454	1.18055	1.39376	small	1.39376
				4.95046	2.42669	2.04001	medium		2.04001			7.52202	2.88333	2.60879	medium		2.60879			6.66067	4.245	1.56906	medium		1.56906			4.96252	2.55069	1.94556	medium		1.94556			6.18805	5.25953	1.17654	medium		1.17654
				13.3803	6.1022	2.19271	medium		2.19271			6.06779	3.7729	1.60826	medium		1.60826			6.16581	4.06492	1.51683	medium		1.51683			6.09074	3.34365	1.82158	medium		1.82158			6.77674	5.13761	1.31905	medium		1.31905
				8.59931	3.5997	2.3889	medium		2.3889			6.04123	2.80854	2.15102	medium		2.15102			5.75699	18.6526	0.308642	medium		0.308642			3.07014	2.68294	1.14432	small	1.14432				5.6491	3.51957	1.60505	medium		1.60505
				30.2788	17.1124	1.76941	large			1.76941		25.669	15.1676	1.69236	large			1.69236		6.52234	3.66509	1.77959	medium		1.77959			9.76983	7.60059	1.2854	medium		1.2854			1.91664	1.28741	1.48876	small	1.48876
				16.0384	8.25353	1.94321	large			1.94321		30.5259	19.2512	1.58566	large			1.58566		4.44509	2.57972	1.72309	medium		1.72309			6.5313	4.22496	1.54588	medium		1.54588			13.965	7.62514	1.83144	medium		1.83144
				5.43391	2.99075	1.8169	medium		1.8169			3.14999	2.91677	1.07996	small	1.07996				2.61512	1.06034	2.46632	small	2.46632				5.30964	2.81465	1.88643	medium		1.88643			4.87641	2.19001	2.22666	medium		2.22666
				10.1693	5.84321	1.74037	medium		1.74037			2.42611	1.53774	1.57772	small	1.57772				8.53397	3.70904	2.30086	medium		2.30086			55.7163	36.7861	1.5146	large			1.5146		5.336	3.15782	1.68977	medium		1.68977
				10.0381	3.85383	2.60472	medium		2.60472			4.73271	2.34704	2.01646	medium		2.01646			2.5	2.67739	0.933742	small	0.933742				8.17722	4.62984	1.7662	medium		1.7662			3.47507	2.98272	1.16507	small	1.16507
				6.77281	2.75663	2.45691	medium		2.45691			10.9807	6.01596	1.82526	medium		1.82526			5.21446	3.14865	1.65609	medium		1.65609			3.57059	3.0591	1.16721	small	1.16721				2.90024	1.32956	2.18136	small	2.18136
				1.97475	1.39378	1.41683	small	1.41683				1.22059	2.19685	0.555609	small	0.555609				3.5349	2.19087	1.61347	small	1.61347				7.04743	4.80491	1.46672	medium		1.46672			3.26879	1.92058	1.70197	small	1.70197
				41.8413	22.8258	1.83307	large			1.83307		3.1238	1.80406	1.73154	small	1.73154				8.09451	6.09647	1.32774	medium		1.32774			4.03624	1.50191	2.68741	medium		2.68741			7.8484	5.45721	1.43817	medium		1.43817
				1.94068	1.03776	1.87007	small	1.87007				14.7045	6.59664	2.22909	medium		2.22909			1.1556	2.39232	0.483048	small	0.483048				7.99911	4.8797	1.63926	medium		1.63926			4.7821	2.44488	1.95596	medium		1.95596
				9.9396	3.28673	3.02416	medium		3.02416			4.50302	1.47815	3.04639	medium		3.04639			3.36499	4.17846	0.805318	small	0.805318				8.76233	7.19788	1.21735	medium		1.21735			5.01882	2.92151	1.71788	medium		1.71788
				11.6943	4.55254	2.56873	medium		2.56873			5.99457	3.42449	1.7505	medium		1.7505			5.31752	1.36556	3.89403	medium		3.89403			8.84919	3.35016	2.64143	medium		2.64143			9.88626	6.75265	1.46406	medium		1.46406
				9.45477	4.78423	1.97624	medium		1.97624			6.85771	4.75549	1.44206	medium		1.44206			2.41458	1.03226	2.33913	small	2.33913				8.15025	4.69813	1.73479	medium		1.73479			1.98867	1.27587	1.55867	small	1.55867
				16.2994	6.49522	2.50945	large			2.50945		6.17725	3.25302	1.89893	medium		1.89893			2.84012	1.35823	2.09104	small	2.09104				9.25965	5.55396	1.66721	medium		1.66721			2.66188	1.36016	1.95703	small	1.95703
				26.1575	9.5254	2.74608	large			2.74608		5.20465	3.20073	1.62608	medium		1.62608			2.00513	2.24337	0.893804	small	0.893804				3.30877	1.43036	2.31324	small	2.31324				4.56684	2.77602	1.64511	medium		1.64511
				46.313	24.3548	1.90159	large			1.90159		7.64404	4.31405	1.77189	medium		1.77189			5.29029	1.80813	2.92584	medium		2.92584			6.09607	3.16967	1.92325	medium		1.92325			1.64676	1.88396	0.874096	small	0.874096
				7.42063	1.99363	3.72217	medium		3.72217			1.49335	1.05921	1.40987	small	1.40987				2.14378	2.54065	0.843791	small	0.843791				7.18101	5.09813	1.40856	medium		1.40856			2.07564	1.67424	1.23975	small	1.23975
				40.4099	18.4127	2.19467	large			2.19467		15.0311	9.15284	1.64223	medium		1.64223			1.92219	2.9057	0.661525	small	0.661525				4.28333	2.48023	1.72699	medium		1.72699			6.45169	2.8297	2.27999	medium		2.27999
				20.2231	9.92328	2.03795	large			2.03795		2.09449	1.13339	1.84799	small	1.84799				2.51733	1.10673	2.27457	small	2.27457				6.14216	4.12252	1.48991	medium		1.48991			21.3532	19.6248	1.08808	large			1.08808
				22.2913	9.1257	2.4427	large			2.4427		1.88634	1.15528	1.6328	small	1.6328				1.9844	4.94701	0.401131	small	0.401131				6.78811	3.02061	2.24726	medium		2.24726			1.90849	1.21466	1.57121	small	1.57121
				3.37674	1.73283	1.94868	small	1.94868				2.23231	1.16501	1.91613	small	1.91613				15.1748	10.2011	1.48757	medium		1.48757			1.48035	1.07806	1.37317	small	1.37317				4.20672	2.78304	1.51156	medium		1.51156
				3.31734	1.31312	2.52631	small	2.52631				2.69241	1.981	1.35912	small	1.35912				1.72939	1.2569	1.37592	small	1.37592				3.13913	2.01898	1.55481	small	1.55481				8.8657	4.67302	1.89721	medium		1.89721
				25.7325	12.834	2.00503	large			2.00503		1.65701	1.00631	1.64662	small	1.64662				5.79412	4.40433	1.31555	medium		1.31555			14.8198	10.9556	1.35271	medium		1.35271			2.31345	2.13833	1.0819	small	1.0819
				54.1636	15.3541	3.52764	large			3.52764		4.34654	3.05176	1.42427	medium		1.42427			17.1159	9.67793	1.76855	large			1.76855		1.96701	1.14201	1.72241	small	1.72241				7.11539	4.67001	1.52364	medium		1.52364
				3.30583	2.33268	1.41718	small	1.41718				6.97291	3.37584	2.06553	medium		2.06553			3.66675	1.32649	2.76425	small	2.76425				3.47809	1.27047	2.73764	small	2.73764				2.74777	1.93764	1.4181	small	1.4181
				2.51069	1.88203	1.33403	small	1.33403				3.52504	3.07425	1.14663	small	1.14663				3.18457	1.27033	2.50689	small	2.50689				7.62502	4.42659	1.72255	medium		1.72255			4.85521	2.56931	1.88969	medium		1.88969
				2.80581	1.88446	1.48892	small	1.48892				4.43985	2.70274	1.64272	medium		1.64272			13.0868	8.44911	1.54889	medium		1.54889			3.69289	1.90679	1.93671	small	1.93671				8.30473	5.97298	1.39038	medium		1.39038
				9.0717	3.29947	2.74944	medium		2.74944			1.13912	1.82473	0.624269	small	0.624269				54.1897	40.8073	1.32794	large			1.32794		14.3081	8.79518	1.62681	medium		1.62681			1.54647	1.01749	1.51989	small	1.51989
				4.72209	2.65171	1.78077	medium		1.78077			34.5107	25.7633	1.33953	large			1.33953		8.78806	5.11244	1.71896	medium		1.71896			22.3053	12.4293	1.79457	large			1.79457		1.82994	1.76906	1.03441	small	1.03441
				5.88097	2.90523	2.02427	medium		2.02427			3.6345	1.26047	2.88345	small	2.88345				45.6112	33.982	1.34221	large			1.34221		5.48681	2.69595	2.0352	medium		2.0352			40.2919	27.1847	1.48215	large			1.48215
				9.02474	3.25034	2.77655	medium		2.77655			2.06291	2.14578	0.961381	small	0.961381				14.0991	7.19221	1.96033	medium		1.96033			20.517	11.4364	1.79401	large			1.79401		5.42651	3.84267	1.41217	medium		1.41217
				33.6873	5.08082	6.63029	large			6.63029		13.7739	8.03526	1.71418	medium		1.71418			9.41692	5.26261	1.7894	medium		1.7894			5.95277	4.00002	1.48818	medium		1.48818			2.52055	1.97878	1.27379	small	1.27379
				17.5844	8.22077	2.13903	large			2.13903		6.57849	4.41863	1.48881	medium		1.48881			52.655	42.7736	1.23102	large			1.23102		6.06095	3.64609	1.66231	medium		1.66231			6.96862	3.68714	1.88998	medium		1.88998
				3.68476	1.41926	2.59626	small	2.59626				3.23362	2.18652	1.47889	small	1.47889				59.9278	48.9286	1.2248	large			1.2248		20.1383	10.302	1.9548	large			1.9548		3.42126	1.13138	3.02397	small	3.02397
				4.61758	1.78984	2.57988	medium		2.57988			5.30299	3.96686	1.33682	medium		1.33682			4.69763	3.51247	1.33741	medium		1.33741			6.58398	3.56208	1.84835	medium		1.84835			35.4992	23.8011	1.4915	large			1.4915
				13.035	6.20531	2.10062	medium		2.10062			3.3158	1.60097	2.07112	small	2.07112				49.0569	34.4472	1.42412	large			1.42412		5.84678	4.25639	1.37365	medium		1.37365			3.08125	3.8507	0.80018	small	0.80018
				55.9694	11.4566	4.88536	large			4.88536		15.4359	10.2248	1.50965	medium		1.50965			9.74899	5.47809	1.77963	medium		1.77963			8.84229	4.28458	2.06375	medium		2.06375			1.82098	1.85235	0.983063	small	0.983063
				3.87031	1.01531	3.81193	small	3.81193				56.5427	40.0061	1.41335	large			1.41335		5.82879	2.0169	2.88998	medium		2.88998			5.04185	2.49432	2.02133	medium		2.02133			8.15117	5.75373	1.41668	medium		1.41668
				7.62321	4.38878	1.73698	medium		1.73698			11.9949	6.73466	1.78107	medium		1.78107			4.61469	2.22017	2.07853	medium		2.07853			4.03154	2.4179	1.66737	medium		1.66737			19.5431	20.3046	0.962498	large			0.962498
				9.78443	4.04003	2.42187	medium		2.42187			40.2766	23.6704	1.70156	large			1.70156		14.7539	11.4085	1.29324	medium		1.29324			7.14307	3.55016	2.01204	medium		2.01204			7.75681	4.24806	1.82596	medium		1.82596
				7.16832	4.6423	1.54413	medium		1.54413			1.57805	1.4672	1.07555	small	1.07555				3.80137	7.21236	0.527063	small	0.527063				2.71612	1.49052	1.82226	small	1.82226				2.07156	2.19603	0.943321	small	0.943321
				22.0091	10.2981	2.1372	large			2.1372		4.80305	2.77267	1.73228	medium		1.73228			42.7729	34.004	1.25788	large			1.25788		6.89911	4.49596	1.53451	medium		1.53451			2.78065	2.13281	1.30375	small	1.30375
				9.60579	4.242	2.26445	medium		2.26445			3.08109	1.22885	2.50729	small	2.50729				30.6576	18.3566	1.67012	large			1.67012		1.65031	1.1431	1.44372	small	1.44372				2.5461	1.76756	1.44046	small	1.44046
				18.0854	8.57195	2.10983	large			2.10983		4.04866	1.76089	2.29922	medium		2.29922			4.19472	2.92523	1.43398	medium		1.43398			5.84553	3.52414	1.65871	medium		1.65871			2.06504	2.38869	0.864508	small	0.864508
				7.44319	5.37256	1.38541	medium		1.38541			8.28753	4.13164	2.00587	medium		2.00587			6.20666	2.35264	2.63817	medium		2.63817			14.378	10.9854	1.30883	medium		1.30883			7.15643	3.21051	2.22907	medium		2.22907
				5.38786	2.14708	2.50939	medium		2.50939			9.42593	5.45109	1.72918	medium		1.72918			48.1505	34.4655	1.39706	large			1.39706		43.4398	29.4869	1.47319	large			1.47319		3.88384	2.5959	1.49614	small	1.49614
				9.52246	6.13495	1.55216	medium		1.55216			34.0118	19.5874	1.73641	large			1.73641		15.1823	8.68351	1.7484	medium		1.7484			7.0559	3.98485	1.77068	medium		1.77068			35.7441	26.557	1.34594	large			1.34594
				1.47473	1.69644	0.869311	small	0.869311				6.25405	4.52565	1.38191	medium		1.38191			4.08609	3.14926	1.29748	medium		1.29748			2.81364	2.54202	1.10685	small	1.10685				51.1748	37.7865	1.35431	large			1.35431
				9.53627	6.26778	1.52147	medium		1.52147			5.37728	3.90788	1.37601	medium		1.37601			3.54419	2.5724	1.37778	small	1.37778				7.70812	4.29217	1.79586	medium		1.79586			11.1827	6.39592	1.74841	medium		1.74841
				3.78375	2.49886	1.51419	small	1.51419				2.38125	1.30425	1.82576	small	1.82576				4.62459	1.62133	2.85234	medium		2.85234			7.19073	4.53499	1.58561	medium		1.58561			3.65635	1.74398	2.09656	small	2.09656
				5.54809	2.93798	1.8884	medium		1.8884			2.33065	2.3592	0.987897	small	0.987897				3.89174	2.29648	1.69465	small	1.69465				6.21366	2.15015	2.88987	medium		2.88987			3.85041	2.59791	1.48212	small	1.48212
				6.253	1.77346	3.52586	medium		3.52586			2.41427	2.62613	0.919325	small	0.919325				2.5817	1.60546	1.60808	small	1.60808				4.60192	2.1431	2.14732	medium		2.14732			19.7701	23.6476	0.83603	large			0.83603
				9.41149	4.84306	1.94329	medium		1.94329			5.86501	3.35395	1.74869	medium		1.74869			17.5325	11.1668	1.57005	large			1.57005		7.44033	4.06181	1.83178	medium		1.83178			12.6338	9.044	1.39692	medium		1.39692
				2.26896	1.23912	1.83111	small	1.83111				2.97234	2.23637	1.32909	small	1.32909				5.37323	1.98027	2.71338	medium		2.71338			13.7176	10.6217	1.29147	medium		1.29147			33.3132	29.7234	1.12077	large			1.12077
				7.74108	4.84428	1.59799	medium		1.59799			3.4023	1.86669	1.82264	small	1.82264				16.1578	11.1259	1.45227	large			1.45227		10.6337	6.20329	1.7142	medium		1.7142			1.40677	1.12586	1.24951	small	1.24951
				3.03418	1.86444	1.62739	small	1.62739				6.95317	3.69263	1.88298	medium		1.88298			5.87768	3.85066	1.52641	medium		1.52641			5.09547	3.41086	1.4939	medium		1.4939			14.3373	8.95068	1.60181	medium		1.60181
				9.03993	5.33131	1.69563	medium		1.69563			8.81474	4.98351	1.76878	medium		1.76878			7.51825	3.91537	1.92019	medium		1.92019			6.61659	2.54853	2.59624	medium		2.59624			4.39725	1.88145	2.33716	medium		2.33716
				14.2915	5.85474	2.44102	medium		2.44102			4.95666	3.11439	1.59154	medium		1.59154			6.27506	3.25853	1.92573	medium		1.92573			3.83901	1.98917	1.92995	small	1.92995				1.8737	1.49964	1.24943	small	1.24943
				5.74929	2.27748	2.52441	medium		2.52441			10.0824	1.74082	5.79172	medium		5.79172			8.7277	5.71311	1.52766	medium		1.52766			4.09802	2.26668	1.80794	medium		1.80794			36.5206	27.1982	1.34276	large			1.34276
				7.5629	4.65929	1.62319	medium		1.62319			4.11505	2.03147	2.02566	medium		2.02566			15.9247	12.5153	1.27242	medium		1.27242			6.17164	2.99351	2.06167	medium		2.06167			3.02146	2.43936	1.23863	small	1.23863
				1.35272	1.18817	1.13849	small	1.13849				2.36438	1.65752	1.42646	small	1.42646				4.81616	1.42172	3.38756	medium		3.38756			18.8448	9.66456	1.94989	large			1.94989		7.34315	5.56708	1.31903	medium		1.31903
				3.57564	1.54784	2.31008	small	2.31008				3.34595	1.29209	2.58957	small	2.58957				3.88122	2.3215	1.67185	small	1.67185				4.55269	3.19677	1.42415	medium		1.42415			34.8461	28.9899	1.20201	large			1.20201
				24.814	13.0177	1.90617	large			1.90617		4.78295	1.86304	2.56729	medium		2.56729			12.1905	7.17451	1.69914	medium		1.69914			62.7684	48.4046	1.29674	large			1.29674		39.4102	33.109	1.19032	large			1.19032
				3.23263	1.07779	2.99932	small	2.99932				7.13369	3.69142	1.93251	medium		1.93251			2.02494	1.92228	1.05341	small	1.05341				1.0238	1.10407	0.927293	small	0.927293				1.62148	1.14944	1.41067	small	1.41067
				26.7238	12.8188	2.08474	large			2.08474		13.6946	6.90613	1.98296	medium		1.98296			17.5309	10.4758	1.67347	large			1.67347		2.7202	1.94148	1.4011	small	1.4011				3.33184	2.58035	1.29124	small	1.29124
				2.20588	1.27794	1.72613	small	1.72613				1.99185	2.00045	0.995699	small	0.995699				11.5378	7.37718	1.56399	medium		1.56399			11.9137	8.00981	1.48739	medium		1.48739			3.88928	2.0124	1.93266	small	1.93266
				8.57905	3.97635	2.15752	medium		2.15752			4.09244	3.66709	1.11599	medium		1.11599			11.9615	8.95761	1.33534	medium		1.33534			7.43532	3.58864	2.0719	medium		2.0719			27.3869	18.378	1.4902	large			1.4902
				6.43026	4.02184	1.59884	medium		1.59884			1.78943	2.04971	0.87302	small	0.87302				1.45209	1.08964	1.33264	small	1.33264				7.11234	4.232	1.68061	medium		1.68061			56.0844	52.1347	1.07576	large			1.07576
				1.19065	1.0699	1.11286	small	1.11286				7.10211	2.15672	3.29301	medium		3.29301			5.08386	3.99778	1.27167	medium		1.27167			3.67533	2.60056	1.41328	small	1.41328				7.01184	5.65238	1.24051	medium		1.24051
				20.3304	9.88567	2.05655	large			2.05655		8.77203	5.94786	1.47482	medium		1.47482			2.2292	1.90213	1.17195	small	1.17195				6.36699	3.85856	1.6501	medium		1.6501			3.21062	2.35457	1.36357	small	1.36357
				3.49369	1.09477	3.19125	small	3.19125				6.17545	3.22444	1.9152	medium		1.9152			25.3271	15.0266	1.68548	large			1.68548		4.34981	2.78593	1.56135	medium		1.56135			1.31518	1.27939	1.02798	small	1.02798
				8.22591	3.8981	2.11023	medium		2.11023			6.38433	4.21494	1.51469	medium		1.51469			5.16835	1.24774	4.14217	medium		4.14217			5.90354	3.68837	1.60058	medium		1.60058			38.8843	27.6021	1.40874	large			1.40874
				4.39105	2.15557	2.03707	medium		2.03707			5.12713	2.32211	2.20796	medium		2.20796			7.53063	4.48979	1.67728	medium		1.67728			3.12157	3.53119	0.883999	small	0.883999				4.52716	2.64356	1.71252	medium		1.71252
				17.1834	6.19682	2.77294	large			2.77294		9.46577	5.75389	1.64511	medium		1.64511			5.11264	3.28112	1.5582	medium		1.5582			8.27066	5.019	1.64787	medium		1.64787			11.9383	7.02358	1.69974	medium		1.69974
				9.45846	3.82836	2.47063	medium		2.47063			2.38161	1.26959	1.87589	small	1.87589				2.31555	1.5902	1.45614	small	1.45614				5.30713	2.73172	1.94278	medium		1.94278			10.7451	6.42001	1.67369	medium		1.67369
				3.56183	1.65944	2.1464	small	2.1464				12.5253	6.19594	2.02154	medium		2.02154			6.16179	4.11498	1.4974	medium		1.4974			8.05148	5.38052	1.49641	medium		1.49641			18.2486	2.66062	6.85878	large			6.85878
				31.4795	17.1669	1.83373	large			1.83373		5.59046	2.63221	2.12387	medium		2.12387			19.5747	14.1372	1.38463	large			1.38463		4.74428	3.632	1.30624	medium		1.30624			48.0754	33.8144	1.42174	large			1.42174
				3.20408	1.48901	2.15182	small	2.15182				9.55585	4.34506	2.19924	medium		2.19924			2.673	2.32944	1.14748	small	1.14748				4.42789	2.23904	1.97759	medium		1.97759			3.00624	2.66012	1.13011	small	1.13011
				5.56927	1.0602	5.25306	medium		5.25306			5.55672	2.66808	2.08266	medium		2.08266			6.23297	3.85066	1.61868	medium		1.61868			3.10934	2.83796	1.09562	small	1.09562				7.49508	4.80347	1.56035	medium		1.56035
				26.3118	12.4664	2.11061	large			2.11061		5.61271	2.2461	2.49887	medium		2.49887			39.4698	31.2442	1.26327	large			1.26327		2.5932	1.29811	1.99768	small	1.99768				2.27377	1.50616	1.50964	small	1.50964
				26.6714	10.8767	2.45215	large			2.45215		4.20621	2.0114	2.09119	medium		2.09119			26.145	22.322	1.17127	large			1.17127		3.65055	2.14581	1.70125	small	1.70125				7.19529	5.8636	1.22711	medium		1.22711
				3.14422	1.23002	2.55624	small	2.55624				4.60387	3.37949	1.3623	medium		1.3623			5.14916	2.08099	2.47438	medium		2.47438			12.3749	7.16265	1.72771	medium		1.72771			5.35611	1.81071	2.95802	medium		2.95802
				1.69804	1.54359	1.10005	small	1.10005				8.49533	4.13103	2.05647	medium		2.05647			2.85095	1.01761	2.80163	small	2.80163				8.2114	6.07375	1.35195	medium		1.35195			2.64259	2.11375	1.25019	small	1.25019
				12.5	3.9818	3.13928	medium		3.13928			12.5239	3.89511	3.21528	medium		3.21528			17.9719	11.4079	1.57539	large			1.57539		47.9762	26.2045	1.83084	large			1.83084		30.1654	18.7723	1.60691	large			1.60691
				7.53159	2.97862	2.52855	medium		2.52855			4.4779	1.12366	3.9851	medium		3.9851			5.08324	2.05596	2.47244	medium		2.47244			1.57662	1.76315	0.894203	small	0.894203				39.517	26.3348	1.50057	large			1.50057
				5.80961	2.0464	2.83894	medium		2.83894			48.4504	36.3201	1.33398	large			1.33398		18.3938	12.3877	1.48484	large			1.48484		33.172	22.8993	1.4486	large			1.4486		2.72766	2.05705	1.326	small	1.326
				2.74596	2.195	1.25101	small	1.25101				2.25599	1.05556	2.13725	small	2.13725				5.5029	2.70303	2.03583	medium		2.03583			7.4212	4.73933	1.56588	medium		1.56588			4.45405	3.4714	1.28307	medium		1.28307
				7.09971	4.61198	1.53941	medium		1.53941			5.65829	2.67052	2.1188	medium		2.1188			4.75891	2.84648	1.67185	medium		1.67185			9.51333	6.66183	1.42804	medium		1.42804			3.00651	2.64005	1.13881	small	1.13881
				1.9591	1.04807	1.86925	small	1.86925				7.77468	3.675	2.11556	medium		2.11556			4.92015	2.65542	1.85287	medium		1.85287			7.48392	4.42713	1.69047	medium		1.69047			5.15635	2.83321	1.81997	medium		1.81997
				11.3112	5.64367	2.00423	medium		2.00423			3.82579	2.40419	1.5913	small	1.5913				57.1019	55.2522	1.03348	large			1.03348		7.38358	3.13715	2.3536	medium		2.3536			3.54112	1.88697	1.87662	small	1.87662
				10.2103	3.93025	2.59788	medium		2.59788			1.77867	1.56145	1.13911	small	1.13911				6.14229	4.15527	1.47819	medium		1.47819			9.60991	5.77294	1.66465	medium		1.66465			4.41518	1.16098	3.80298	medium		3.80298
				7.55369	3.09265	2.44247	medium		2.44247			5.53447	2.73801	2.02135	medium		2.02135			56.2202	41.0979	1.36796	large			1.36796		4.60004	2.50516	1.83622	medium		1.83622			2.34634	1.45449	1.61318	small	1.61318
				3.32471	1.20879	2.75044	small	2.75044				10.4473	6.25066	1.6714	medium		1.6714			46.9537	38.7013	1.21323	large			1.21323		2.10717	1.89486	1.11205	small	1.11205				9.45358	4.86618	1.94271	medium		1.94271
				3.8169	1.24761	3.05936	small	3.05936				8.35644	4.80656	1.73855	medium		1.73855			56.3533	44.8155	1.25745	large			1.25745		15.2538	9.57784	1.59262	medium		1.59262			3.36907	2.2166	1.51993	small	1.51993
				6.52465	2.43033	2.68468	medium		2.68468			6.54188	2.63951	2.47845	medium		2.47845			29.9746	20.4095	1.46866	large			1.46866		2.65466	1.34852	1.96858	small	1.96858				5.04138	3.06451	1.64509	medium		1.64509
				5.1885	1.7862	2.90477	medium		2.90477			23.6754	14.9809	1.58037	large			1.58037		40.5032	16.452	2.4619	large			2.4619		1.4929	1.56803	0.952083	small	0.952083				26.6903	24.7544	1.07821	large			1.07821
				34.6882	18.5425	1.87074	large			1.87074		12.6764	7.55126	1.67872	medium		1.67872			9.46551	5.86634	1.61353	medium		1.61353			1.35649	1.00326	1.35209	small	1.35209				4.89815	2.63553	1.85851	medium		1.85851
				8.2213	4.18377	1.96504	medium		1.96504			4.38745	2.39264	1.83373	medium		1.83373			4.5661	2.68106	1.7031	medium		1.7031			7.70436	3.82496	2.01423	medium		2.01423			4.31951	2.02996	2.12788	medium		2.12788
				7.60157	2.07672	3.66037	medium		3.66037			2.08444	1.7238	1.20922	small	1.20922				2.04413	1.12504	1.81694	small	1.81694				7.99723	6.37944	1.25359	medium		1.25359			3.30466	2.04902	1.6128	small	1.6128
				5.48317	2.52494	2.1716	medium		2.1716			6.44031	3.64885	1.76502	medium		1.76502			12.1345	7.26302	1.67072	medium		1.67072			6.24125	5.05803	1.23393	medium		1.23393			4.93973	4.06142	1.21626	medium		1.21626
				6.06745	4.93283	1.23001	medium		1.23001			3.58282	1.98343	1.80637	small	1.80637				11.2525	8.44178	1.33295	medium		1.33295			1.61832	1.04445	1.54945	small	1.54945				2.29225	1.70635	1.34337	small	1.34337
				2.51805	1.45929	1.72553	small	1.72553				3.95607	3.18005	1.24403	small	1.24403				1.40567	1.26544	1.11081	small	1.11081				7.16345	4.16913	1.71821	medium		1.71821			4.60272	2.67818	1.7186	medium		1.7186
				4.47485	1.74192	2.56891	medium		2.56891			37.1155	24.6092	1.50819	large			1.50819		5.15938	3.58145	1.44058	medium		1.44058			7.68052	4.67916	1.64143	medium		1.64143			3.33347	1.459	2.28476	small	2.28476
				5.54072	2.03184	2.72695	medium		2.72695			11.7279	7.5166	1.56026	medium		1.56026			54.0622	41.2835	1.30954	large			1.30954		8.572	4.52198	1.89563	medium		1.89563			2.87415	1.65517	1.73646	small	1.73646
				2.92046	1.25792	2.32165	small	2.32165				1.71479	1.07927	1.58883	small	1.58883				29.7641	23.994	1.24048	large			1.24048		2.27964	1.39838	1.6302	small	1.6302				31.9086	23.1764	1.37677	large			1.37677
				12.2445	4.55739	2.68673	medium		2.68673			3.40481	1.84662	1.8438	small	1.8438				13.101	8.31786	1.57504	medium		1.57504			5.40904	3.51926	1.53698	medium		1.53698			11.5637	6.46617	1.78834	medium		1.78834
				13.3513	4.12252	3.23863	medium		3.23863			11.9583	5.97522	2.00131	medium		2.00131			47.4702	37.4682	1.26695	large			1.26695		7.32839	4.36588	1.67856	medium		1.67856			9.43346	5.95341	1.58455	medium		1.58455
				3.60419	3.87445	0.930245	small	0.930245				40.4722	25.9713	1.55835	large			1.55835		15.6245	9.75484	1.60172	medium		1.60172			1.56188	1.12087	1.39345	small	1.39345				3.17149	2.49706	1.27009	small	1.27009
				8.27655	3.12479	2.64867	medium		2.64867			7.38959	4.0459	1.82644	medium		1.82644			39.458	34.2567	1.15183	large			1.15183		19.4403	11.5334	1.68556	large			1.68556		3.60308	2.35808	1.52797	small	1.52797
				7.00855	2.92525	2.39588	medium		2.39588			11.3862	7.48924	1.52034	medium		1.52034			8.88152	5.12709	1.73227	medium		1.73227			7.36131	3.62062	2.03316	medium		2.03316			12.5865	8.82023	1.427	medium		1.427
				2.00836	1.358	1.47891	small	1.47891				8.16623	1.85513	4.40196	medium		4.40196			10.6954	5.52693	1.93514	medium		1.93514			16.7778	11.1166	1.50925	large			1.50925		2.32242	1.26032	1.84272	small	1.84272
				9.53719	4.44094	2.14756	medium		2.14756			2.16484	1.9512	1.10949	small	1.10949				9.93685	6.32783	1.57034	medium		1.57034			4.8719	2.65042	1.83816	medium		1.83816			3.29596	1.78311	1.84843	small	1.84843
				11.6441	4.44761	2.61805	medium		2.61805			4.92651	1.63624	3.01087	medium		3.01087			3.68717	2.17622	1.6943	small	1.6943				9.35748	4.48675	2.08558	medium		2.08558			9.47396	4.86016	1.94931	medium		1.94931
				9.50864	4.91342	1.93524	medium		1.93524			17.9755	11.1393	1.6137	large			1.6137		4.18234	3.06319	1.36535	medium		1.36535			8.77582	4.83472	1.81517	medium		1.81517			8.46862	6.06077	1.39728	medium		1.39728
				8.76414	3.0423	2.88076	medium		2.88076			4.34008	3.45185	1.25732	medium		1.25732			9.17986	5.07215	1.80985	medium		1.80985			3.65338	1.82928	1.99717	small	1.99717				2.96982	1.93212	1.53708	small	1.53708
				9.4207	6.05246	1.55651	medium		1.55651			2.97414	1.34499	2.21128	small	2.21128				6.13363	3.96725	1.54606	medium		1.54606			4.49656	2.32576	1.93337	medium		1.93337			1.93648	1.1655	1.66151	small	1.66151
				3.2667	2.52616	1.29315	small	1.29315				29.278	20.0891	1.45741	large			1.45741		2.72159	1.52061	1.7898	small	1.7898				3.77598	1.8721	2.01698	small	2.01698				5.3822	3.4714	1.55044	medium		1.55044
				9.38018	3.7119	2.52706	medium		2.52706			4.74814	3.14418	1.51014	medium		1.51014			7.4251	2.67373	2.77706	medium		2.77706			4.85622	2.81357	1.726	medium		1.726			3.71506	1.80418	2.05913	small	2.05913
				5.01124	2.30902	2.17029	medium		2.17029			2.92246	1.80771	1.61667	small	1.61667				10.2463	4.26759	2.40096	medium		2.40096			1.51485	1.48998	1.01669	small	1.01669				28.6445	18.1552	1.57775	large			1.57775
				30.858	15.7119	1.96399	large			1.96399		14.3137	7.61206	1.88039	medium		1.88039			4.8663	2.08771	2.33093	medium		2.33093			7.63757	3.55233	2.15002	medium		2.15002			5.34823	2.73638	1.95449	medium		1.95449
				3.54019	1.14026	3.10473	small	3.10473				21.9663	14.1333	1.55423	large			1.55423		5.86902	1.87039	3.13786	medium		3.13786			7.75609	4.73824	1.63691	medium		1.63691			5.04519	3.24512	1.5547	medium		1.5547
				5.55591	3.11933	1.78112	medium		1.78112			6.38864	3.23964	1.97202	medium		1.97202			4.20307	4.79074	0.877333	medium		0.877333			3.98513	1.06559	3.73984	small	3.73984				12.178	5.95291	2.04572	medium		2.04572
				2.50516	1.11539	2.24599	small	2.24599				6.7644	3.8191	1.7712	medium		1.7712			13.573	7.8814	1.72215	medium		1.72215			4.94371	1.8076	2.73496	medium		2.73496			3.70256	1.81623	2.0386	small	2.0386
				44.8889	20.1249	2.23051	large			2.23051		1.3986	1.15649	1.20935	small	1.20935				11.0027	4.60028	2.39175	medium		2.39175			6.97123	2.96479	2.35134	medium		2.35134			2.62709	1.50014	1.75123	small	1.75123
				10.7108	5.6461	1.89703	medium		1.89703			18.6322	12.6017	1.47855	large			1.47855		5.81362	2.58216	2.25145	medium		2.25145			2.06955	1.19567	1.73087	small	1.73087				3.07119	1.92309	1.59701	small	1.59701
				14.6336	9.13844	1.60132	medium		1.60132			4.26328	2.90704	1.46653	medium		1.46653			3.55935	2.06695	1.72203	small	1.72203				4.63923	2.41682	1.91956	medium		1.91956			2.04058	1.36367	1.49638	small	1.49638
				2.4453	2.06702	1.18301	small	1.18301				7.13692	3.08216	2.31556	medium		2.31556			5.59358	3.39039	1.64984	medium		1.64984			2.71863	1.57074	1.73079	small	1.73079				6.42994	4.37349	1.47021	medium		1.47021
				2.56179	1.08021	2.37156	small	2.37156				6.38038	2.52215	2.52973	medium		2.52973			17.0011	11.9121	1.42721	large			1.42721		10.0216	6.22389	1.61019	medium		1.61019			2.17756	1.18255	1.8414	small	1.8414
				10.7255	4.81759	2.22633	medium		2.22633			6.53255	3.09371	2.11156	medium		2.11156			10.225	6.28021	1.62813	medium		1.62813			2.90646	1.74473	1.66585	small	1.66585				2.54665	1.73746	1.46573	small	1.46573
				87.3711	45.113	1.93672	large			1.93672		3.46941	1.31519	2.63795	small	2.63795				3.63672	3.08883	1.17738	small	1.17738				5.74048	3.13769	1.82953	medium		1.82953			6.10951	2.35256	2.59696	medium		2.59696
				5.24099	2.82214	1.8571	medium		1.8571			2.4602	1.0361	2.37448	small	2.37448				10.0034	4.86826	2.05482	medium		2.05482			3.98074	2.05259	1.93938	small	1.93938				25.6624	18.4929	1.38769	large			1.38769
				25.4664	12.5216	2.0338	large			2.0338		24.7076	15.5008	1.59395	large			1.59395		5.0297	3.14377	1.5999	medium		1.5999			5.4266	2.26018	2.40096	medium		2.40096			2.97362	1.09325	2.71999	small	2.71999
				8.33457	3.41471	2.44078	medium		2.44078			6.97614	4.87406	1.43128	medium		1.43128			22.9821	15.1261	1.51937	large			1.51937		11.7334	6.92308	1.69482	medium		1.69482			4.30891	1.96072	2.19762	medium		2.19762
				9.58093	6.50857	1.47205	medium		1.47205			9.24649	4.93972	1.87186	medium		1.87186			5.44658	2.80986	1.93838	medium		1.93838			3.35392	2.20164	1.52337	small	1.52337				4.60136	2.49505	1.84419	medium		1.84419
				40.1659	23.0011	1.74626	large			1.74626		6.26015	4.48187	1.39677	medium		1.39677			4.87929	3.74261	1.30371	medium		1.30371			3.52795	2.44554	1.4426	small	1.4426				3.77784	2.64156	1.43016	small	1.43016
				8.00859	4.12191	1.94293	medium		1.94293			5.21685	2.19503	2.37667	medium		2.37667			5.51064	2.4613	2.23892	medium		2.23892			4.67216	2.73064	1.71101	medium		1.71101			1.97399	1.2538	1.57441	small	1.57441
				8.11633	3.10842	2.61108	medium		2.61108			3.91659	2.05335	1.90741	small	1.90741				4.46366	3.43007	1.30133	medium		1.30133			6.37138	3.24988	1.96049	medium		1.96049			21.9463	13.6673	1.60574	large			1.60574
				22.9585	12.3457	1.85963	large			1.85963		8.63889	5.84753	1.47736	medium		1.47736			6.07947	3.3446	1.81769	medium		1.81769			5.84678	3.50192	1.66959	medium		1.66959			3.88031	2.65259	1.46284	small	1.46284
				66.8842	32.4622	2.06037	large			2.06037		5.52191	3.01771	1.82984	medium		1.82984			8.12669	5.43719	1.49465	medium		1.49465			4.75745	4.53932	1.04805	medium		1.04805			4.52607	2.53469	1.78565	medium		1.78565
				1.11929	2.42426	0.461702	small	0.461702				4.11039	2.80185	1.46703	medium		1.46703			56.0348	44.3033	1.2648	large			1.2648		13.5016	5.71115	2.36408	medium		2.36408			2.98857	1.64363	1.81827	small	1.81827
				6.53983	12.7685	0.512187	medium		0.512187			7.96094	6.09318	1.30653	medium		1.30653			12.5176	10.0454	1.2461	medium		1.2461			9.03639	4.55342	1.98453	medium		1.98453			6.29405	2.17295	2.89655	medium		2.89655
				2.12807	2.46429	0.863562	small	0.863562				3.41019	2.07707	1.64183	small	1.64183				7.1543	2.76408	2.58832	medium		2.58832			2.72835	1.76153	1.54885	small	1.54885				2.86572	2.46094	1.16448	small	1.16448
				3.77869	2.10038	1.79905	small	1.79905				9.92946	6.74622	1.47186	medium		1.47186			5.42955	2.24215	2.42158	medium		2.42158			7.50963	4.48241	1.67535	medium		1.67535			4.05778	2.69875	1.50358	medium		1.50358
				5.82158	3.20061	1.8189	medium		1.8189			12.1812	6.21175	1.96099	medium		1.96099			35.5502	18.8706	1.8839	large			1.8839		10.6999	6.3686	1.6801	medium		1.6801			5.48711	4.40911	1.24449	medium		1.24449
				5.84783	2.23503	2.61644	medium		2.61644			19.734	13.8104	1.42892	large			1.42892		19.1046	8.07552	2.36575	large			2.36575		1.89207	1.02006	1.85486	small	1.85486				2.16642	1.50265	1.44173	small	1.44173
				7.85434	6.49462	1.20936	medium		1.20936			42.6801	25.3748	1.68199	large			1.68199		5.81548	1.78126	3.2648	medium		3.2648			4.42883	1.29649	3.41603	medium		3.41603			1.29724	1.53677	0.844135	small	0.844135
				10.3452	2.57043	4.0247	medium		4.0247			3.70987	1.43133	2.5919	small	2.5919				4.70103	1.99919	2.35147	medium		2.35147			12.7876	8.12905	1.57307	medium		1.57307			3.03831	1.70735	1.77954	small	1.77954
				3.90392	1.57331	2.48134	small	2.48134				4.19222	3.2664	1.28344	medium		1.28344			6.00891	3.25242	1.84752	medium		1.84752			8.1399	3.04501	2.6732	medium		2.6732			6.66558	4.96552	1.34237	medium		1.34237
				29.7235	12.1001	2.45647	large			2.45647		10.9369	4.44174	2.46229	medium		2.46229			5.51683	2.93866	1.87733	medium		1.87733			3.40064	1.39621	2.43562	small	2.43562				8.98665	6.30662	1.42495	medium		1.42495
				50.0235	24.0152	2.083	large			2.083		5.59979	3.0402	1.84191	medium		1.84191			2.98712	1.76234	1.69497	small	1.69497				4.66401	2.23362	2.08809	medium		2.08809			2.00851	3.94703	0.508866	small	0.508866
				8.94877	3.85504	2.32132	medium		2.32132			9.63302	4.93608	1.95155	medium		1.95155			7.72932	2.5199	3.06731	medium		3.06731			39.9146	25.0912	1.59078	large			1.59078		4.06567	1.88145	2.16092	medium		2.16092
				8.37278	4.33298	1.93234	medium		1.93234			41.3906	27.2706	1.51777	large			1.51777		28.2186	14.9137	1.89213	large			1.89213		9.3509	1.59405	5.86613	medium		5.86613			32.403	26.0237	1.24513	large			1.24513
				3.19349	2.5025	1.27612	small	1.27612				2.56931	2.15003	1.19501	small	1.19501				8.24429	4.30788	1.91377	medium		1.91377			2.25643	1.83687	1.22841	small	1.22841				3.26091	1.70535	1.91217	small	1.91217
				10.3609	5.94632	1.7424	medium		1.7424			3.56559	1.60462	2.22208	small	2.22208				12.9367	6.74476	1.91803	medium		1.91803			33.2319	29.6024	1.12261	large			1.12261		23.7507	17.1784	1.38259	large			1.38259
				18.7871	8.88006	2.11565	large			2.11565		21.2669	10.7131	1.98513	large			1.98513		10.6774	6.5598	1.62771	medium		1.62771			4.93273	3.0114	1.63802	medium		1.63802			1.58208	4.04336	0.391277	small	0.391277
				10.8673	5.26217	2.06518	medium		2.06518			8.42462	5.19206	1.6226	medium		1.6226			23.5903	13.7831	1.71153	large			1.71153		5.19237	3.04934	1.70278	medium		1.70278			4.77231	2.17797	2.19118	medium		2.19118
				6.88976	2.49158	2.76521	medium		2.76521			5.00582	1.68488	2.97103	medium		2.97103			6.4329	3.03145	2.12205	medium		2.12205			15.3316	10.0548	1.5248	medium		1.5248			7.82557	3.28426	2.38275	medium		2.38275
				30.8271	12.228	2.52102	large			2.52102		4.33111	2.1093	2.05334	medium		2.05334			5.03249	1.80446	2.78891	medium		2.78891			7.87431	4.3442	1.8126	medium		1.8126			2.46402	1.55533	1.58424	small	1.58424
				1.20861	1.06444	1.13544	small	1.13544				9.53576	6.33457	1.50535	medium		1.50535			5.40387	3.11081	1.73713	medium		1.73713			8.7269	3.78105	2.30806	medium		2.30806			4.49183	1.96122	2.29032	medium		2.29032
				1.56958	1.31615	1.19256	small	1.19256				4.82889	1.58881	3.03931	medium		3.03931			7.23106	3.09066	2.33964	medium		2.33964			4.84619	2.38863	2.02885	medium		2.02885			7.05125	5.96294	1.18251	medium		1.18251
				7.45562	2.59955	2.86805	medium		2.86805			3.71632	2.59512	1.43204	small	1.43204				7.97566	3.37024	2.3665	medium		2.3665			12.0601	5.85207	2.06083	medium		2.06083			4.81607	2.46595	1.95303	medium		1.95303
				3.46376	1.06262	3.25963	small	3.25963				6.19089	6.3972	0.967749	medium		0.967749			31.9203	22.4642	1.42094	large			1.42094		11.2345	2.89324	3.88301	medium		3.88301			16.6763	9.4815	1.75883	large			1.75883
				2.58113	1.09598	2.35508	small	2.35508				5.90054	2.84867	2.07133	medium		2.07133			16.6474	11.5709	1.43873	large			1.43873		2.98109	1.65855	1.79741	small	1.79741				2.12483	1.25781	1.68931	small	1.68931
				1.45309	1.04746	1.38725	small	1.38725				5.91023	4.12373	1.43322	medium		1.43322			33.4049	24.1509	1.38318	large			1.38318		2.84374	3.47536	0.818259	small	0.818259				1.85576	1.44847	1.28119	small	1.28119
				61.4618	32.4149	1.8961	large			1.8961		1.92222	1.47997	1.29883	small	1.29883				12.1682	9.03208	1.34722	medium		1.34722			3.28148	1.9805	1.6569	small	1.6569				8.49389	5.69402	1.49172	medium		1.49172
				8.3516	4.29113	1.94625	medium		1.94625			1.9574	4.64361	0.421526	small	0.421526				2.78286	2.94782	0.944041	small	0.944041				2.27399	1.04933	2.16709	small	2.16709				13.2094	9.01189	1.46577	medium		1.46577
				15.3334	7.75739	1.97662	medium		1.97662			11.323	6.00927	1.88426	medium		1.88426			14.8567	9.42154	1.57689	medium		1.57689			8.16969	3.97184	2.0569	medium		2.0569			1.5356	1.38625	1.10773	small	1.10773
				25.3288	13.6843	1.85093	large			1.85093		10.8055	6.98335	1.54733	medium		1.54733			20.8012	17.5056	1.18826	large			1.18826		57.7356	41.0859	1.40524	large			1.40524		5.29387	3.42725	1.54464	medium		1.54464
				11.9977	6.48977	1.84871	medium		1.84871			3.08109	2.53188	1.21692	small	1.21692				7.94812	5.69602	1.39538	medium		1.39538			9.05238	6.28297	1.44078	medium		1.44078			3.71044	3.91893	0.946798	small	0.946798
				18.3386	7.97331	2.3	large			2.3		7.80087	4.83575	1.61317	medium		1.61317			6.77054	5.10511	1.32623	medium		1.32623			11.6484	7.09327	1.64218	medium		1.64218			6.125	4.15524	1.47404	medium		1.47404
				8.09699	4.43245	1.82675	medium		1.82675			1.81312	1.4745	1.22965	small	1.22965				7.58014	3.47035	2.18426	medium		2.18426			5.3573	2.70842	1.97802	medium		1.97802			4.41709	4.82805	0.91488	medium		0.91488
				17.8478	8.00182	2.23047	large			2.23047		3.4346	1.74204	1.9716	small	1.9716				4.92448	3.18955	1.54394	medium		1.54394			4.45266	2.44771	1.81911	medium		1.81911			1.93839	2.52917	0.766412	small	0.766412
				10.3333	5.74253	1.79943	medium		1.79943			5.94074	2.93076	2.02703	medium		2.02703			58.5033	58.9856	0.991822	large			0.991822		8.65384	5.13607	1.68491	medium		1.68491			20.7379	12.9735	1.59849	large			1.59849
				7.84928	2.2702	3.45752	medium		3.45752			7.81559	3.89998	2.00401	medium		2.00401			7.19391	10.9244	0.658515	medium		0.658515			6.18638	3.83471	1.61326	medium		1.61326			6.54002	4.48688	1.45759	medium		1.45759
				19.1259	11.1836	1.71017	large			1.71017		2.01051	1.03489	1.94274	small	1.94274				19.1393	13.5982	1.40749	large			1.40749		10.9379	7.03311	1.5552	medium		1.5552			2.90948	1.27838	2.27591	small	2.27591
				7.61585	2.07248	3.67475	medium		3.67475			16.4997	10.009	1.64849	large			1.64849		5.02754	3.50271	1.43533	medium		1.43533			9.27721	5.11494	1.81375	medium		1.81375			3.16252	1.83328	1.72505	small	1.72505
				67.1167	36.0661	1.86094	large			1.86094		1.23531	1.0586	1.16693	small	1.16693				50.678	40.3825	1.25495	large			1.25495		2.44928	1.28239	1.90993	small	1.90993				38.1472	29.8849	1.27647	large			1.27647
				13.5645	6.67293	2.03277	medium		2.03277			16.5381	9.03123	1.83121	large			1.83121		9.46675	6.78138	1.39599	medium		1.39599			8.32616	4.10517	2.02821	medium		2.02821			41.706	30.9461	1.3477	large			1.3477
				22.3466	11.502	1.94284	large			1.94284		8.54665	5.77213	1.48067	medium		1.48067			50.4679	36.273	1.39134	large			1.39134		5.73358	2.14093	2.67807	medium		2.67807			12.6386	8.1966	1.54194	medium		1.54194
				26.1198	13.8723	1.88287	large			1.88287		2.80474	1.15953	2.41885	small	2.41885				18.2517	12.4249	1.46896	large			1.46896		9.53653	5.10518	1.86801	medium		1.86801			45.7902	33.5314	1.36559	large			1.36559
				33.7651	18.1519	1.86014	large			1.86014		2.50722	2.27286	1.10311	small	1.10311				40.9522	24.1838	1.69337	large			1.69337		29.0219	20.16	1.43958	large			1.43958		4.31598	3.0349	1.42211	medium		1.42211
				9.94144	3.70826	2.68089	medium		2.68089			4.07952	2.42122	1.6849	medium		1.6849			4.89632	3.30676	1.4807	medium		1.4807			4.0422	2.51655	1.60625	medium		1.60625			22.8212	9.06607	2.5172	large			2.5172
				5.35195	2.12828	2.51468	medium		2.51468			1.17968	1.8375	0.642001	small	0.642001				22.1373	14.6835	1.50762	large			1.50762		3.66059	1.46234	2.50324	small	2.50324				5.21777	3.47642	1.50091	medium		1.50091
				23.1063	9.92874	2.32721	large			2.32721		5.31806	2.96785	1.79189	medium		1.79189			8.64755	6.3791	1.35561	medium		1.35561			2.92621	1.37128	2.13393	small	2.13393				5.71596	3.70871	1.54122	medium		1.54122
				25.3743	12.2341	2.07406	large			2.07406		23.1001	14.2823	1.61739	large			1.61739		3.64137	2.29587	1.58605	small	1.58605				2.40256	1.44716	1.66018	small	1.66018				1.66769	1.57189	1.06094	small	1.06094
				3.16172	1.56543	2.01972	small	2.01972				6.79454	4.0532	1.67634	medium		1.67634			5.90182	3.1926	1.84859	medium		1.84859			17.8492	11.6803	1.52815	large			1.52815		6.51202	2.98272	2.18325	medium		2.18325
				6.32805	2.90766	2.17634	medium		2.17634			4.97747	4.57551	1.08785	medium		1.08785			31.0726	21.9691	1.41438	large			1.41438		14.8361	8.81794	1.68249	medium		1.68249			1.12248	2.00989	0.558479	small	0.558479
				4.16314	1.90023	2.19086	medium		2.19086			18.2619	12.1633	1.5014	large			1.5014		15.891	9.73592	1.6322	medium		1.6322			4.49248	2.18213	2.05876	medium		2.05876			7.25183	6.23236	1.16358	medium		1.16358
				7.98832	5.00015	1.59762	medium		1.59762			6.08429	3.15877	1.92616	medium		1.92616			4.31789	1.39669	3.09152	medium		3.09152			11.5387	7.00601	1.64697	medium		1.64697			2.45342	2.41277	1.01685	small	1.01685
				20.4105	16.0194	1.27411	large			1.27411		27.0852	13.1094	2.0661	large			2.0661		2.08034	1.54686	1.34488	small	1.34488				66.8125	45.8014	1.45874	large			1.45874		4.34995	2.45692	1.77049	medium		1.77049
				22.2734	13.6443	1.63244	large			1.63244		5.7071	3.58805	1.59059	medium		1.59059			60.665	39.1292	1.55037	large			1.55037		25.5476	9.06022	2.81976	large			2.81976		1.95714	2.042	0.958443	small	0.958443
				2.77036	1.80743	1.53276	small	1.53276				13.0629	11.751	1.11165	medium		1.11165			10.1866	3.29638	3.09024	medium		3.09024			34.2372	16.3811	2.09004	large			2.09004		5.35829	4.39607	1.21888	medium		1.21888
				7.16924	3.50508	2.04539	medium		2.04539			7.1721	5.07532	1.41313	medium		1.41313			6.59785	4.37625	1.50765	medium		1.50765			20.2201	13.1285	1.54016	large			1.54016		6.66042	4.17832	1.59404	medium		1.59404
				2.95315	1.78923	1.65051	small	1.65051				10.3626	5.98616	1.7311	medium		1.7311			12.9574	6.3205	2.05006	medium		2.05006			8.73662	5.75396	1.51837	medium		1.51837			3.29406	3.36503	0.978908	small	0.978908
				3.84269	1.55451	2.47196	small	2.47196				1.04114	1.81439	0.573825	small	0.573825				6.1098	2.43932	2.50471	medium		2.50471			1.26054	1.45855	0.864246	small	0.864246				26.1174	18.4141	1.41833	large			1.41833
				9.20522	3.70584	2.48398	medium		2.48398			5.19424	5.43102	0.956402	medium		0.956402			17.5074	12.4408	1.40726	large			1.40726		2.37904	1.63903	1.45149	small	1.45149				9.3503	4.67302	2.00091	medium		2.00091
				5.94313	1.94936	3.04877	medium		3.04877			21.6426	12.3609	1.7509	large			1.7509		50.1228	36.9579	1.35621	large			1.35621		51.082	32.9731	1.5492	large			1.5492		3.91374	2.20556	1.77449	small	1.77449
				8.93357	6.63654	1.34612	medium		1.34612			21.5342	12.7081	1.69453	large			1.69453		10.9823	7.05608	1.55643	medium		1.55643			3.8572	1.35502	2.84659	small	2.84659				4.05833	3.51605	1.15423	medium		1.15423
				9.56712	3.237	2.95555	medium		2.95555			3.49668	1.85209	1.88796	small	1.88796				5.92132	1.70008	3.48297	medium		3.48297			7.8925	4.37997	1.80195	medium		1.80195			5.30583	2.32698	2.28014	medium		2.28014
				3.22618	1.27612	2.52812	small	2.52812				7.79585	4.22528	1.84505	medium		1.84505			6.23452	4.9348	1.26338	medium		1.26338			57.6908	41.8279	1.37924	large			1.37924		2.86681	1.71337	1.6732	small	1.6732
				5.50389	1.94026	2.83668	medium		2.83668			7.57764	3.74432	2.02377	medium		2.02377			12.941	8.63285	1.49904	medium		1.49904			14.849	9.30575	1.59568	medium		1.59568			13.4013	8.87492	1.51002	medium		1.51002
				3.48632	1.40955	2.47335	small	2.47335				8.43432	4.67644	1.80358	medium		1.80358			30.8557	3.91598	7.87943	large			7.87943		5.78909	3.39623	1.70456	medium		1.70456			7.56846	4.92237	1.53756	medium		1.53756
				8.03253	4.27839	1.87746	medium		1.87746			2.76885	1.20757	2.29291	small	2.29291				5.02537	3.21946	1.56093	medium		1.56093			2.78103	1.3805	2.01452	small	2.01452				4.27739	2.33952	1.82832	medium		1.82832
				26.5406	15.3971	1.72374	large			1.72374		25.4544	17.0689	1.49127	large			1.49127		4.6803	1.30512	3.5861	medium		3.5861			1.37186	1.3496	1.01649	small	1.01649				5.5287	3.48444	1.58668	medium		1.58668
				7.74799	2.88825	2.68259	medium		2.68259			8.17017	4.32013	1.89119	medium		1.89119			17.05	11.6649	1.46165	large			1.46165		36.8091	22.2804	1.65209	large			1.65209		5.54663	3.04644	1.82069	medium		1.82069
				5.20554	3.19636	1.62858	medium		1.62858			3.37789	1.5353	2.20015	small	2.20015				5.7867	3.57413	1.61905	medium		1.61905			8.64569	5.27646	1.63854	medium		1.63854			3.52182	2.26225	1.55677	small	1.55677
				5.44818	2.87309	1.89628	medium		1.89628			2.88298	1.936	1.48914	small	1.48914				4.53608	2.94415	1.54071	medium		1.54071			5.80915	3.3469	1.73568	medium		1.73568			10.5089	4.16277	2.5245	medium		2.5245
				6.07712	3.28006	1.85274	medium		1.85274			1.20588	1.66907	0.722483	small	0.722483				14.9263	10.5905	1.4094	medium		1.4094			6.81508	4.2152	1.61679	medium		1.61679			9.09753	4.6976	1.93663	medium		1.93663
				10.6095	2.68749	3.94774	medium		3.94774			3.18983	2.83469	1.12529	small	1.12529				3.24523	1.51939	2.13588	small	2.13588				6.59464	4.82496	1.36678	medium		1.36678			5.45586	3.29479	1.6559	medium		1.6559
				7.72543	3.55785	2.17138	medium		2.17138			6.41304	4.64057	1.38195	medium		1.38195			5.13555	3.40992	1.50606	medium		1.50606			4.11808	3.14257	1.31042	medium		1.31042			2.17022	1.09475	1.98238	small	1.98238
				38.4646	20.1498	1.90893	large			1.90893										8.04901	4.41532	1.82297	medium		1.82297			19.3123	12.1058	1.5953	large			1.5953		5.36155	3.32941	1.61036	medium		1.61036
				5.95326	2.33207	2.55278	medium		2.55278											3.01714	2.83916	1.06269	small	1.06269				11.0021	8.01739	1.37228	medium		1.37228			9.62399	5.69803	1.689	medium		1.689
				6.09737	2.90705	2.09744	medium		2.09744											2.07106	3.60282	0.574843	small	0.574843				7.05088	2.95937	2.38256	medium		2.38256			1.82125	1.16148	1.56804	small	1.56804
				17.0029	10.921	1.5569	large			1.5569										12.033	6.85464	1.75545	medium		1.75545			7.98688	3.54907	2.25041	medium		2.25041			6.45603	2.91148	2.21744	medium		2.21744
				2.99643	2.12403	1.41073	small	1.41073												2.4511	2.69021	0.911117	small	0.911117				10.7171	6.51874	1.64405	medium		1.64405			3.62646	2.93255	1.23662	small	1.23662
				33.649	15.1175	2.22583	large			2.22583										4.46892	3.85127	1.16038	medium		1.16038			10.9197	5.18865	2.10453	medium		2.10453			8.07697	3.62342	2.2291	medium		2.2291
				4.39749	4.03518	1.08979	medium		1.08979						small					24.0669	16.3458	1.47236	large			1.47236		8.65541	4.748	1.82296	medium		1.82296			2.63715	2.43083	1.08488	small	1.08488
				5.84598	1.08385	5.39371	medium		5.39371						small					5.10645	3.59244	1.42144	medium		1.42144			5.21087	4.01954	1.29638	medium		1.29638			7.45322	4.5501	1.63804	medium		1.63804
				1.44066	1.06384	1.35421	small	1.35421							small					29.7267	19.8393	1.49837	large			1.49837		4.65554	5.15613	0.902913	medium		0.902913			19.9405	13.1621	1.51499	large			1.51499
				11.7306	4.99773	2.3472	medium		2.3472						small					5.91823	3.81647	1.55071	medium		1.55071			7.56137	5.02279	1.50541	medium		1.50541			24.9329	15.1028	1.65089	large			1.65089
				9.89402	4.59439	2.1535	medium		2.1535						small					5.78391	3.01863	1.91607	medium		1.91607			2.92809	1.25313	2.33663	small	2.33663				5.47842	3.21352	1.7048	medium		1.7048
				19.568	8.30083	2.35735	large			2.35735					small					64.8173	48.3835	1.33966	large			1.33966		5.71571	2.32793	2.45528	medium		2.45528			7.95059	8.56084	0.928716	medium		0.928716
				5.84138	2.08218	2.80541	medium		2.80541						small					56.669	50.0818	1.13153	large			1.13153		8.59144	5.79733	1.48197	medium		1.48197			9.23506	5.60471	1.64773	medium		1.64773
				11.366	4.97468	2.28477	medium		2.28477						small					22.4505	21.5974	1.0395	large			1.0395		3.95722	3.12414	1.26666	small	1.26666				4.40268	1.68327	2.61556	medium		2.61556
				11.4889	5.80743	1.97831	medium		1.97831						small					9.26806	8.1152	1.14206	medium		1.14206			4.56398	1.61356	2.82851	medium		2.82851			1.15428	1.24677	0.925814	small	0.925814
				13.2477	5.81713	2.27736	medium		2.27736						small					8.2805	4.3445	1.90597	medium		1.90597			9.45218	7.76211	1.21773	medium		1.21773			4.4304	2.59289	1.70868	medium		1.70868
				5.37175	2.31509	2.32032	medium		2.32032						small					42.08	31.0379	1.35576	large			1.35576		7.55886	3.961	1.90832	medium		1.90832			34.3425	22.892	1.5002	large			1.5002
				21.848	9.27794	2.35483	large			2.35483					small					20.8922	15.4094	1.35581	large			1.35581		2.63742	1.04228	2.53042	small	2.53042				4.32087	3.31888	1.30191	medium		1.30191
				18.1853	9.64367	1.88572	large			1.88572					small					2.29419	2.23055	1.02853	small	1.02853				11.7415	7.41414	1.58367	medium		1.58367			2.07999	1.35113	1.53944	small	1.53944
				4.76629	1.68309	2.83186	medium		2.83186						small					4.00841	2.42711	1.65152	medium		1.65152			10.3383	7.13338	1.44929	medium		1.44929			10.0249	4.22147	2.37473	medium		2.37473
				5.88235	2.86641	2.05217	medium		2.05217						small					1.94974	1.44369	1.35052	small	1.35052				4.33288	2.38917	1.81355	medium		1.81355			2.09358	2.01591	1.03853	small	1.03853
				7.78713	4.6144	1.68757	medium		1.68757						small					6.18686	3.64128	1.69909	medium		1.69909			4.1601	3.374	1.23299	medium		1.23299			9.47777	7.36725	1.28647	medium		1.28647
				4.07796	1.55754	2.6182	medium		2.6182						small					5.92101	2.64504	2.23854	medium		2.23854			8.18035	4.51439	1.81206	medium		1.81206			4.14938	2.73036	1.51972	medium		1.51972
				9.17806	3.29583	2.78475	medium		2.78475						small					41.7525	34.388	1.21416	large			1.21416		4.72954	4.43905	1.06544	medium		1.06544			1.95279	1.76104	1.10889	small	1.10889
				10.7849	5.53328	1.9491	medium		1.9491						small					3.86884	1.8649	2.07456	small	2.07456				13.3147	7.85859	1.69429	medium		1.69429			4.44209	4.02981	1.10231	medium		1.10231
				17.9873	8.71206	2.06465	large			2.06465					small					32.9171	20.9924	1.56805	large			1.56805		5.08638	3.02441	1.68178	medium		1.68178			6.47152	3.98065	1.62575	medium		1.62575
				12.5193	5.05838	2.47497	medium		2.47497						small					4.68308	3.55337	1.31793	medium		1.31793			2.2188	1.17182	1.89346	small	1.89346				7.09827	5.04078	1.40817	medium		1.40817
				3.57979	1.321	2.7099	small	2.7099							small					6.80923	3.09737	2.19839	medium		2.19839			2.68539	1.30949	2.05071	small	2.05071				17.9708	14.145	1.27047	large			1.27047
				2.51529	2.04822	1.22804	small	1.22804							small					6.6712	4.20227	1.58752	medium		1.58752			4.53199	3.59243	1.26154	medium		1.26154			17.38	19.0167	0.913933	large			0.913933
				3.92786	3.12964	1.25505	small	1.25505							small					4.56517	2.71219	1.68321	medium		1.68321			2.74842	1.56695	1.754	small	1.754				3.0981	1.92911	1.60597	small	1.60597
				3.967	1.29431	3.06494	small	3.06494							small					7.85527	3.53445	2.22249	medium		2.22249			8.50207	5.34583	1.59041	medium		1.59041			6.63922	4.33335	1.53212	medium		1.53212
				7.60342	3.54268	2.14623	medium		2.14623						small					40.8968	37.1587	1.1006	large			1.1006		12.691	6.53175	1.94298	medium		1.94298			3.44137	2.09869	1.63977	small	1.63977
				20.3502	9.43199	2.15757	large			2.15757					small					18.8639	11.5587	1.63201	large			1.63201		7.65481	4.71439	1.62371	medium		1.62371			2.76109	3.48244	0.79286	small	0.79286
				3.78559	1.05171	3.59948	small	3.59948							small					3.13443	2.0816	1.50578	small	1.50578				15.5316	8.24992	1.88264	medium		1.88264			3.20627	3.76741	0.851055	small	0.851055
				80.0771	42.0349	1.90502	large			1.90502					small					42.9013	27.1664	1.5792	large			1.5792		7.29891	3.86886	1.88658	medium		1.88658			1.42851	1.11482	1.28138	small	1.28138
				5.94866	1.23427	4.81958	medium		4.81958						small					5.43853	4.99768	1.08821	medium		1.08821			3.25828	1.78158	1.82887	small	1.82887				2.31835	1.57992	1.46739	small	1.46739
				9.62283	4.6696	2.06074	medium		2.06074						small					5.55582	3.58756	1.54864	medium		1.54864			8.78805	4.59136	1.91404	medium		1.91404			4.76497	2.61446	1.82254	medium		1.82254
				16.3362	7.91145	2.06489	large			2.06489					small					5.84983	4.28224	1.36607	medium		1.36607			6.54227	3.98918	1.64	medium		1.64			9.96155	6.19774	1.60729	medium		1.60729
				12.4314	5.71767	2.17421	medium		2.17421						small					3.93754	2.30441	1.7087	small	1.7087				4.29337	3.80815	1.12741	medium		1.12741			1.57637	1.49513	1.05434	small	1.05434
				15.0761	6.5583	2.29878	medium		2.29878						small					46.7507	34.3306	1.36178	large			1.36178		7.80877	3.8217	2.04327	medium		2.04327			3.04293	1.87091	1.62644	small	1.62644
				5.59827	2.4837	2.25401	medium		2.25401						small					13.5541	8.40455	1.61271	medium		1.61271			10.7949	5.67809	1.90115	medium		1.90115			5.54799	5.20785	1.06531	medium		1.06531
				4.11663	2.90159	1.41875	medium		1.41875						small					42.6788	38.9925	1.09454	large			1.09454		5.3479	2.03687	2.62555	medium		2.62555			12.4767	7.52178	1.65874	medium		1.65874
				4.81786	1.07839	4.46763	medium		4.46763						small					7.79028	4.56793	1.70543	medium		1.70543			4.92803	2.06885	2.38202	medium		2.38202			5.39036	3.11769	1.72896	medium		1.72896
				8.155	2.63836	3.09093	medium		3.09093						small					15.6001	9.01621	1.73022	medium		1.73022			2.31664	1.12738	2.05489	small	2.05489				9.56012	5.97298	1.60056	medium		1.60056
				2.86521	1.17483	2.43883	small	2.43883							small					11.098	7.79777	1.42323	medium		1.42323			20.5638	12.7844	1.60851	large			1.60851		4.3418	3.36905	1.28873	medium		1.28873
				9.32309	3.30675	2.81941	medium		2.81941						small					11.4966	6.92728	1.65962	medium		1.65962			3.44172	2.61899	1.31414	small	1.31414				10.8473	6.95283	1.56013	medium		1.56013
				9.36315	3.9903	2.34648	medium		2.34648						small					6.24844	4.77365	1.30895	medium		1.30895			13.7935	6.40546	2.1534	medium		2.1534			10.7296	6.24792	1.71731	medium		1.71731
				7.14115	2.97195	2.40285	medium		2.40285						small					5.30298	3.14194	1.6878	medium		1.6878			4.17892	1.96966	2.12164	medium		2.12164			20.5104	14.0763	1.45709	large			1.45709
				2.81825	3.04413	0.9258	small	0.9258							small					9.55217	6.52317	1.46434	medium		1.46434			7.57266	4.9377	1.53364	medium		1.53364			2.6328	1.02602	2.56604	small	2.56604
				26.8702	13.0396	2.06067	large			2.06067					small					2.23539	1.05728	2.11428	small	2.11428				5.82828	2.88728	2.01861	medium		2.01861			4.73861	2.83723	1.67016	medium		1.67016
				5.59966	3.43776	1.62887	medium		1.62887						small					8.07686	2.8648	2.81935	medium		2.81935			3.27804	2.47535	1.32427	small	1.32427				4.50868	2.47448	1.82207	medium		1.82207
				3.4412	2.57771	1.33498	small	1.33498							small					2.77791	1.6195	1.71529	small	1.71529				4.87943	2.66885	1.82829	medium		1.82829			6.13369	4.43019	1.38452	medium		1.38452
				15.5816	7.73131	2.01539	medium		2.01539						small					10.238	5.36516	1.90823	medium		1.90823			5.76839	2.94528	1.95852	medium		1.95852			13.9215	9.94308	1.40012	medium		1.40012
				1.41396	1.21183	1.1668	small	1.1668							small					3.95735	1.39058	2.84582	small	2.84582				7.29954	4.2049	1.73596	medium		1.73596			42.9829	31.8963	1.34758	large			1.34758
				5.20185	3.07748	1.69029	medium		1.69029						small					6.31343	2.94965	2.1404	medium		2.1404			16.145	9.68461	1.66707	large			1.66707		3.53976	2.21158	1.60056	small	1.60056
				4.95599	2.43275	2.03719	medium		2.03719						small					57.2774	26.4449	2.16591	large			2.16591		6.07098	2.88457	2.10464	medium		2.10464			5.73906	3.3244	1.72635	medium		1.72635
				5.69634	2.05246	2.77537	medium		2.77537						small					16.9157	8.81354	1.91928	large			1.91928		5.48116	2.61357	2.0972	medium		2.0972			1.82097	1.23624	1.473	small	1.473
				4.54759	2.50068	1.81854	medium		1.81854						small					24.5914	18.8437	1.30502	large			1.30502		6.80128	3.80599	1.787	medium		1.787			16.445	11.4181	1.44025	large			1.44025
				2.89283	1.22335	2.36468	small	2.36468							small					6.17695	3.66631	1.68479	medium		1.68479			6.70658	1.57291	4.26381	medium		4.26381			37.28	24.8994	1.49723	large			1.49723
				39.9126	17.0014	2.34761	large			2.34761					small					9.08887	7.18427	1.26511	medium		1.26511			8.78679	4.55884	1.92742	medium		1.92742			5.74042	4.47484	1.28282	medium		1.28282
				4.64152	2.55709	1.81516	medium		1.81516						small					16.4576	7.68911	2.14038	large			2.14038		6.07725	3.96208	1.53385	medium		1.53385			48.5282	9.55575	5.07842	large			5.07842
				2.85278	1.58423	1.80073	small	1.80073							small					16.8922	9.79513	1.72455	large			1.72455		26.4187	16.263	1.62447	large			1.62447		3.79497	2.2467	1.68913	small	1.68913
				5.07708	1.39257	3.64583	medium		3.64583						small					3.09822	1.90702	1.62464	small	1.62464				3.74525	3.49596	1.07131	small	1.07131				4.80438	2.66313	1.80404	medium		1.80404
				5.08491	1.0135	5.0172	medium		5.0172						small					25.8065	14.8996	1.73202	large			1.73202		6.77024	3.02061	2.24134	medium		2.24134			2.35123	1.8368	1.28007	small	1.28007
				3.85005	2.20531	1.74581	small	1.74581							small					45.1154	41.5246	1.08647	large			1.08647		5.09453	2.26018	2.25404	medium		2.25404			29.5577	20.5269	1.43995	large			1.43995
				6.54398	2.75239	2.37757	medium		2.37757						small					38.0796	23.6857	1.6077	large			1.6077		2.57345	1.52304	1.68967	small	1.68967				14.9026	9.13933	1.63061	medium		1.63061
				4.9012	1.39196	3.52107	medium		3.52107						small					35.2822	27.7671	1.27065	large			1.27065		14.3413	7.43419	1.9291	medium		1.9291			20.0978	15.4991	1.29671	large			1.29671
				16.1212	6.12585	2.63167	large			2.63167					small					9.91921	6.18132	1.60471	medium		1.60471			11.4869	6.8575	1.67509	medium		1.67509			9.41987	6.05024	1.55694	medium		1.55694
				3.95319	1.1257	3.51176	small	3.51176							small					15.6756	11.45	1.36904	medium		1.36904			3.34106	2.18863	1.52655	small	1.52655				2.63498	2.66514	0.988684	small	0.988684
				10.5681	5.57999	1.89392	medium		1.89392						small					1.8897	1.20074	1.57378	small	1.57378				1.58289	1.56532	1.01122	small	1.01122				7.1374	4.64542	1.53644	medium		1.53644
				51.472	28.9443	1.77831	large			1.77831					small					17.1942	12.2821	1.39994	large			1.39994		2.36273	1.77399	1.33187	small	1.33187				2.7263	1.25831	2.16663	small	2.16663
				50.2846	28.8425	1.74342	large			1.74342					small					7.13975	4.42081	1.61503	medium		1.61503			1.91997	1.16803	1.64377	small	1.64377				5.25202	2.71882	1.93173	medium		1.93173
				12.8536	8.81274	1.45853	medium		1.45853						small					62.9016	53.7243	1.17082	large			1.17082		4.95249	3.75124	1.32023	medium		1.32023			23.2199	17.5788	1.3209	large			1.3209
				7.48002	1.60061	4.67324	medium		4.67324						small					28.6048	22.488	1.272	large			1.272		2.49255	1.54527	1.61302	small	1.61302				7.83345	4.85564	1.61327	medium		1.61327
				11.9466	5.66186	2.11001	medium		2.11001						small					3.12082	2.8123	1.1097	small	1.1097				6.45981	4.00219	1.61407	medium		1.61407			4.27793	3.03892	1.40772	medium		1.40772
				47.1146	23.388	2.01447	large			2.01447					small					5.22963	2.97895	1.75553	medium		1.75553			3.24417	1.65421	1.96116	small	1.96116				1.91936	1.28842	1.48971	small	1.48971
				8.34562	3.50933	2.37813	medium		2.37813						small					57.1716	51.0383	1.12017	large			1.12017		8.05148	4.31547	1.86572	medium		1.86572			31.8975	26.254	1.21496	large			1.21496
				8.71349	2.82032	3.08954	medium		3.08954						small					16.669	9.53813	1.74762	large			1.74762		4.06478	1.24933	3.25356	medium		3.25356			4.0586	1.42739	2.84337	medium		2.84337
				11.1731	5.57089	2.00562	medium		2.00562						small					2.7841	1.17815	2.36311	small	2.36311				8.58705	4.16588	2.06128	medium		2.06128			3.69169	1.77258	2.08267	small	2.08267
				3.8588	3.42684	1.12605	small	1.12605							small					5.85942	2.72989	2.1464	medium		2.1464			2.81897	2.2656	1.24425	small	1.24425				1.57528	1.40983	1.11735	small	1.11735
				4.11249	1.71827	2.39339	medium		2.39339						small					34.9758	24.0587	1.45377	large			1.45377		9.98023	5.15017	1.93785	medium		1.93785			2.2436	1.39127	1.61263	small	1.61263
				3.71929	1.73647	2.14187	small	2.14187							small					3.23966	2.95514	1.09628	small	1.09628				8.0358	4.13011	1.94566	medium		1.94566			2.39254	1.50315	1.59168	small	1.59168
				3.28143	1.59272	2.06027	small	2.06027							small					2.01906	1.28803	1.56756	small	1.56756				6.57332	4.71764	1.39335	medium		1.39335			5.52761	3.72176	1.48521	medium		1.48521
				18.6849	6.42305	2.90903	large			2.90903					small					6.3385	3.27013	1.9383	medium		1.9383			5.23501	2.90896	1.79962	medium		1.79962			6.00052	4.23903	1.41554	medium		1.41554
				9.807	4.85277	2.02091	medium		2.02091						small					14.9152	6.20513	2.40368	medium		2.40368			5.03213	3.69758	1.36092	medium		1.36092			7.12381	2.60493	2.73474	medium		2.73474
				74.2615	40.0437	1.85451	large			1.85451					small					15.2807	9.68281	1.57812	medium		1.57812			5.8471	2.42386	2.4123	medium		2.4123			1.78374	1.91055	0.933626	small	0.933626
				8.40225	4.08309	2.05781	medium		2.05781						small					6.5864	2.99543	2.19881	medium		2.19881			7.39424	4.05965	1.8214	medium		1.8214			2.06857	1.30046	1.59065	small	1.59065
				8.76644	2.81668	3.11233	medium		3.11233						small					3.07099	1.8826	1.63125	small	1.63125				6.01392	5.35613	1.12281	medium		1.12281			3.62999	1.23875	2.93038	small	2.93038
				6.34692	2.40607	2.63788	medium		2.63788						small					7.44769	3.2219	2.31158	medium		2.31158			2.61547	1.6244	1.61011	small	1.61011				3.47507	2.14034	1.62361	small	1.62361
				10.8618	5.63215	1.92854	medium		1.92854						small					1.39607	1.614	0.864975	small	0.864975				9.62621	6.14042	1.56768	medium		1.56768			2.77549	1.30899	2.12034	small	2.12034
				60.9456	27.8047	2.19192	large			2.19192					small					3.84036	2.11945	1.81196	small	1.81196				5.10864	3.18268	1.60514	medium		1.60514			3.5914	1.46452	2.45227	small	2.45227
				14.1239	5.96452	2.36799	medium		2.36799						small					11.4261	7.44371	1.535	medium		1.535			11.7177	6.45478	1.81535	medium		1.81535			3.24487	2.83522	1.14449	small	1.14449
				13.4333	9.4326	1.42413	medium		1.42413						small					5.94051	1.45041	4.09575	medium		4.09575			2.71267	1.76478	1.53712	small	1.53712				14.0142	10.0896	1.38897	medium		1.38897
				2.31316	1.12024	2.06487	small	2.06487							small					1.31004	1.01272	1.29358	small	1.29358				5.56394	2.94528	1.88911	medium		1.88911			3.73707	1.50616	2.48119	small	2.48119
				31.4091	15.7786	1.99061	large			1.99061					small					19.3191	6.1801	3.12602	large			3.12602		4.92489	2.85368	1.72581	medium		1.72581			4.17139	2.74491	1.51968	medium		1.51968
				9.80653	5.34587	1.83441	medium		1.83441						small					30.2011	9.01438	3.35033	large			3.35033		4.10429	1.03307	3.97291	medium		3.97291			12.5764	6.74863	1.86355	medium		1.86355
				21.8051	11.2516	1.93797	large			1.93797					small					14.7214	5.02881	2.92742	medium		2.92742			9.47664	4.46886	2.12059	medium		2.12059			9.81614	7.60156	1.29133	medium		1.29133
				2.06545	1.61274	1.28071	small	1.28071							small					4.47201	4.32436	1.03414	medium		1.03414			4.80229	2.06614	2.32428	medium		2.32428			3.60281	1.1946	3.01593	small	3.01593
				1.19434	1.18999	1.00365	small	1.00365							small					41.3954	49.3395	0.838992	large			0.838992		7.56043	3.93173	1.92293	medium		1.92293			9.44814	7.29049	1.29595	medium		1.29595
				8.63614	2.7633	3.12529	medium		3.12529						small					1.82471	1.42904	1.27687	small	1.27687				9.87487	4.8938	2.01783	medium		2.01783			10.7323	8.6632	1.23884	medium		1.23884
				4.01534	1.75284	2.29076	medium		2.29076						small					11.5137	7.96503	1.44553	medium		1.44553			7.09164	2.574	2.75511	medium		2.75511			4.79324	1.97377	2.42847	medium		2.42847
				26.9881	12.1801	2.21575	large			2.21575					small					14.7063	6.82167	2.15582	medium		2.15582			5.6091	2.54582	2.20326	medium		2.20326			26.6335	20.8731	1.27598	large			1.27598
				2.68518	1.72555	1.55613	small	1.55613							small					2.93327	2.67495	1.09657	small	1.09657				1.92123	1.98104	0.969807	small	0.969807				5.10525	3.50552	1.45635	medium		1.45635
				4.28009	2.58438	1.65614	medium		1.65614						small					4.29994	2.97651	1.44463	medium		1.44463			4.9227	3.24555	1.51675	medium		1.51675			25.3355	17.8898	1.41619	large			1.41619
				7.54678	3.37953	2.23309	medium		2.23309						small					4.6967	3.71941	1.26275	medium		1.26275			2.67065	1.4824	1.80158	small	1.80158				26.54	23.2933	1.13938	large			1.13938
				3.97667	1.84079	2.16031	small	2.16031							small					4.31109	3.55948	1.21116	medium		1.21116			33.7587	17.7172	1.90542	large			1.90542		45.2588	37.1925	1.21688	large			1.21688
				4.94494	3.45292	1.4321	medium		1.4321						small					2.87818	2.03399	1.41504	small	1.41504				1.11285	1.02494	1.08577	small	1.08577				2.48033	1.92761	1.28674	small	1.28674
				8.98699	4.44579	2.02146	medium		2.02146						small					19.7313	15.3715	1.28363	large			1.28363		2.07425	1.29052	1.60729	small	1.60729				1.81989	1.43141	1.2714	small	1.2714
				7.90499	3.10478	2.54607	medium		2.54607						small					5.53756	2.54126	2.17906	medium		2.17906			9.54468	7.32362	1.30327	medium		1.30327			3.36228	1.52974	2.19794	small	2.19794
				5.18712	2.7166	1.90941	medium		1.90941						small					4.18667	2.97284	1.40831	medium		1.40831			21.6901	9.05588	2.39514	large			2.39514		4.44127	3.2095	1.38379	medium		1.38379
				8.50723	4.18499	2.0328	medium		2.0328						small					10.433	6.74842	1.54598	medium		1.54598			14.7543	8.0407	1.83495	medium		1.83495			5.00496	2.59791	1.92654	medium		1.92654
				8.82215	4.20622	2.09741	medium		2.09741						small					3.19262	1.86429	1.71251	small	1.71251				58.279	40.6404	1.43402	large			1.43402		3.41283	1.75652	1.94295	small	1.94295
				47.1823	26.5092	1.77985	large			1.77985					small					4.06938	2.15241	1.89061	medium		1.89061			7.11861	3.44555	2.06603	medium		2.06603			8.22999	5.72412	1.43777	medium		1.43777
				6.51682	3.06778	2.12428	medium		2.12428						small					12.1035	7.46752	1.62082	medium		1.62082			12.638	6.85478	1.84368	medium		1.84368			5.43357	2.75545	1.97194	medium		1.97194
				16.6599	9.53874	1.74655	large			1.74655					small					17.5678	6.01956	2.91845	large			2.91845		6.57645	4.23146	1.55418	medium		1.55418			11.2129	7.42244	1.51067	medium		1.51067
				6.66554	3.02836	2.20104	medium		2.20104						small					5.89316	3.134	1.88039	medium		1.88039			12.3872	5.94204	2.08467	medium		2.08467			9.19945	6.41148	1.43484	medium		1.43484
				11.8223	6.09067	1.94104	medium		1.94104						small					7.85249	5.68992	1.38007	medium		1.38007			3.79197	2.33281	1.6255	small	1.6255				14.3724	9.37965	1.53229	medium		1.53229
				9.44741	3.69431	2.55728	medium		2.55728						small					1.97976	1.74891	1.13199	small	1.13199				17.5325	11.1849	1.56752	large			1.56752		8.68061	5.99706	1.44748	medium		1.44748
				10.3609	4.78848	2.16371	medium		2.16371						small					27.4641	18.5025	1.48435	large			1.48435		22.2658	17.4825	1.27361	large			1.27361		3.08805	1.96875	1.56853	small	1.56853
				3.48171	2.26171	1.53941	small	1.53941							small					16.7888	13.5042	1.24323	large			1.24323		2.01624	1.39296	1.44745	small	1.44745				4.51466	2.72334	1.65777	medium		1.65777
				26.6585	14.8379	1.79665	large			1.79665					small					19.7279	16.1773	1.21948	large			1.21948		7.45256	2.98105	2.49998	medium		2.49998			35.758	22.3386	1.60073	large			1.60073
				10.5331	2.40485	4.37993	medium		4.37993						small					10.151	6.16118	1.64758	medium		1.64758			3.88197	3.15774	1.22935	small	1.22935				2.8005	1.22369	2.28856	small	2.28856
				4.96427	2.18287	2.2742	medium		2.2742						small					13.3554	9.32509	1.4322	medium		1.4322			4.25166	2.65205	1.60316	medium		1.60316			3.39272	1.61905	2.0955	small	2.0955
				5.7608	1.84625	3.12028	medium		3.12028						small					3.3978	2.19942	1.54487	small	1.54487				4.60631	3.76642	1.22299	medium		1.22299			40.9817	29.1043	1.4081	large			1.4081
				12.332	6.89431	1.78871	medium		1.78871						small					59.2996	42.8706	1.38322	large			1.38322		2.60669	1.39567	1.86769	small	1.86769				4.86472	3.27723	1.4844	medium		1.4844
				11.1081	5.44958	2.03835	medium		2.03835						small					7.58324	4.07103	1.86273	medium		1.86273			3.24793	1.38917	2.33804	small	2.33804				2.41972	2.61195	0.926403	small	0.926403
				1.8974	1.31494	1.44296	small	1.44296							small					5.59203	2.47595	2.25854	medium		2.25854			6.99726	4.19027	1.66988	medium		1.66988			2.95242	2.14636	1.37555	small	1.37555
				9.96032	6.5862	1.5123	medium		1.5123						small					6.11289	4.63019	1.32022	medium		1.32022			6.8157	3.95775	1.72212	medium		1.72212			5.60507	4.4056	1.27226	medium		1.27226
				6.53017	1.69765	3.84659	medium		3.84659						small					1.84328	1.37715	1.33847	small	1.33847				43.0224	27.6668	1.55502	large			1.55502		2.57165	1.34712	1.909	small	1.909
				2.72892	1.01835	2.67976	small	2.67976							small					4.05979	3.01069	1.34846	medium		1.34846			3.76563	2.72847	1.38013	small	1.38013				4.91527	2.08063	2.36239	medium		2.36239
				22.6159	7.87627	2.8714	large			2.8714					small					13.3025	5.79369	2.29603	medium		2.29603			15.3959	8.43691	1.82482	medium		1.82482			53.2703	43.8011	1.21618	large			1.21618
				25.6801	10.9277	2.35	large			2.35					small					6.54029	2.75492	2.37404	medium		2.37404			8.79244	5.76752	1.52448	medium		1.52448			7.62472	4.0544	1.88061	medium		1.88061
				8.94739	4.15951	2.15107	medium		2.15107						small					16.5099	11.002	1.50063	large			1.50063		7.69213	4.39461	1.75036	medium		1.75036			4.22113	2.00086	2.10966	medium		2.10966
				13.7975	5.50963	2.50425	medium		2.50425						small					9.02388	5.78881	1.55885	medium		1.55885			2.61641	2.05963	1.27033	small	1.27033				1.62203	1.59497	1.01697	small	1.01697
				3.30399	1.00682	3.2816	small	3.2816							small					57.3031	37.898	1.51203	large			1.51203		2.98673	1.7599	1.6971	small	1.6971				2.73771	2.80863	0.974751	small	0.974751
				9.91013	3.54086	2.79879	medium		2.79879						small					2.36785	2.07733	1.13985	small	1.13985				9.51991	4.36805	2.17944	medium		2.17944			1.05372	1.57289	0.669925	small	0.669925
				6.95698	3.85504	1.80464	medium		1.80464						small					18.0029	12.1783	1.47828	large			1.47828		5.09673	2.20977	2.30645	medium		2.30645			7.63151	7.84238	0.973111	medium		0.973111
				10.3752	5.18575	2.00071	medium		2.00071						small					6.04016	2.19514	2.7516	medium		2.7516			5.88943	2.35611	2.49964	medium		2.49964			18.0141	11.3755	1.58359	large			1.58359
				5.13555	2.10159	2.44365	medium		2.44365						small					1.32118	1.37166	0.963198	small	0.963198				2.30378	1.24228	1.85447	small	1.85447				31.8276	21.8594	1.45601	large			1.45601
				10.5506	6.23018	1.69346	medium		1.69346						small					7.56591	4.32192	1.75059	medium		1.75059			7.32494	5.33337	1.37342	medium		1.37342			3.07609	1.21065	2.54086	small	2.54086
				14.1096	3.42926	4.11448	medium		4.11448						small					39.346	26.2099	1.50119	large			1.50119		10.3929	5.33662	1.94747	medium		1.94747			13.7367	8.57188	1.60253	medium		1.60253
				2.02356	1.08143	1.87119	small	1.87119							small					12.0416	8.96798	1.34274	medium		1.34274			40.9648	24.9254	1.6435	large			1.6435		14.2721	10.9726	1.3007	medium		1.3007
				3.73494	2.6602	1.40401	small	1.40401							small					8.60051	5.157	1.66773	medium		1.66773			32.1131	17.038	1.88479	large			1.88479		5.15309	2.75244	1.87219	medium		1.87219
				6.84418	3.29158	2.0793	medium		2.0793						small					6.9454	4.27247	1.62562	medium		1.62562			8.75669	4.23471	2.06783	medium		2.06783			2.67873	2.11926	1.26399	small	1.26399
				6.20005	3.70948	1.67141	medium		1.67141						small					17.9478	10.1962	1.76025	large			1.76025		26.2259	15.0695	1.74033	large			1.74033		6.21414	3.79049	1.6394	medium		1.6394
				11.1289	3.98787	2.79068	medium		2.79068						small					8.83974	3.3971	2.60214	medium		2.60214			22.9259	15.8294	1.44831	large			1.44831		2.78691	1.36066	2.0482	small	2.0482
				3.05997	1.45443	2.10389	small	2.10389							small					7.19329	4.79501	1.50016	medium		1.50016			7.05182	3.32035	2.12382	medium		2.12382			8.39061	5.0458	1.66289	medium		1.66289
				6.02785	1.56239	3.85808	medium		3.85808						small					3.09761	1.51939	2.03872	small	2.03872				8.30453	6.21955	1.33523	medium		1.33523			3.83763	2.54221	1.50956	small	1.50956
				3.86847	1.26641	3.05466	small	3.05466							small					1.17418	1.10368	1.06388	small	1.06388				5.88943	3.57726	1.64635	medium		1.64635			11.3778	7.35973	1.54596	medium		1.54596
				5.53059	1.42411	3.88355	medium		3.88355						small					5.53725	3.25304	1.70218	medium		1.70218			3.06669	1.04337	2.93923	small	2.93923				11.1262	7.25186	1.53425	medium		1.53425
				9.99025	5.77528	1.72983	medium		1.72983						small					8.79857	4.4788	1.96449	medium		1.96449			3.70261	1.82928	2.02408	small	2.02408				2.6184	1.39779	1.87324	small	1.87324
				22.1546	12.1547	1.82272	large			1.82272					small					2.36723	1.0231	2.31378	small	2.31378				5.73609	3.33715	1.71886	medium		1.71886			7.24503	4.35894	1.66211	medium		1.66211
				8.5017	4.01092	2.11964	medium		2.11964						small					3.58411	1.1458	3.12805	small	3.12805				2.47907	1.30732	1.89629	small	1.89629				4.88293	3.19144	1.53001	medium		1.53001
				6.35844	1.11357	5.70995	medium		5.70995						small					4.88022	6.91202	0.706048	medium		0.706048			5.09892	2.40489	2.12023	medium		2.12023			3.31064	3.06952	1.07855	small	1.07855
				8.49203	4.27839	1.98486	medium		1.98486						small					5.54468	3.7188	1.49098	medium		1.49098			7.93169	5.88622	1.3475	medium		1.3475			2.36727	1.13037	2.09423	small	2.09423
				25.0626	12.3027	2.03717	large			2.03717					small					2.17349	1.49192	1.45685	small	1.45685				3.50286	1.97508	1.77353	small	1.77353				4.07654	2.68671	1.5173	medium		1.5173
				4.25937	2.09492	2.03319	medium		2.03319						small					5.32959	4.02097	1.32545	medium		1.32545			15.3378	8.94965	1.71379	medium		1.71379			6.68542	4.15474	1.60911	medium		1.60911
				23.191	10.3539	2.23983	large			2.23983					small					5.09222	3.55337	1.43307	medium		1.43307			8.61402	5.89164	1.46208	medium		1.46208			6.50958	2.34654	2.77411	medium		2.77411
				30.6508	17.1936	1.78268	large			1.78268					small					45.5452	36.0508	1.26336	large			1.26336		5.48179	2.88349	1.9011	medium		1.9011			3.75311	1.10479	3.39713	small	3.39713
				56.0371	26.104	2.14668	large			2.14668					small					27.0716	17.1479	1.57872	large			1.57872		7.39079	4.61358	1.60196	medium		1.60196			4.40893	3.41972	1.28927	medium		1.28927
				13.9595	8.59864	1.62346	medium		1.62346						small					31.647	21.7671	1.45389	large			1.45389		6.17916	3.62712	1.7036	medium		1.7036			3.52318	2.60493	1.3525	small	1.3525
				50.2887	22.3703	2.24801	large			2.24801					small					19.3856	12.4469	1.55747	large			1.55747		6.07788	3.09324	1.96489	medium		1.96489			2.55208	1.81271	1.40788	small	1.40788
				64.6	33.3064	1.93957	large			1.93957					small					10.6388	7.14276	1.48945	medium		1.48945			15.8766	8.13122	1.95254	medium		1.95254			1.09965	1.32605	0.829271	small	0.829271
				6.65587	1.75042	3.80244	medium		3.80244						small					34.1244	24.9597	1.36718	large			1.36718		8.9997	4.09	2.20042	medium		2.20042			3.80611	2.29537	1.65817	small	1.65817
				9.25173	3.92418	2.35762	medium		2.35762						small					18.5176	13.824	1.33952	large			1.33952		22.7819	13.4342	1.69581	large			1.69581		4.09203	2.625	1.55887	medium		1.55887
				33.1546	13.7898	2.40427	large			2.40427					small					12.1487	10.7993	1.12495	medium		1.12495			41.284	33.1102	1.24687	large			1.24687		4.4497	2.88238	1.54376	medium		1.54376
				3.37121	1.6	2.10701	small	2.10701							small					50.0658	40.0626	1.24969	large			1.24969		6.84581	3.17292	2.15757	medium		2.15757			35.3	26.0879	1.35312	large			1.35312
				15.6521	6.17559	2.5345	medium		2.5345						small					23.6119	19.285	1.22437	large			1.22437		17.2697	9.59843	1.79922	large			1.79922		8.42921	3.42876	2.45839	medium		2.45839
				12.4544	6.44913	1.93118	medium		1.93118						small					3.78218	1.25995	3.00185	small	3.00185				6.2864	4.13119	1.52169	medium		1.52169			1.90931	1.06716	1.78915	small	1.78915
				4.44262	1.77407	2.50419	medium		2.50419						small					3.88771	2.0114	1.93284	small	1.93284				13.5446	8.00113	1.69283	medium		1.69283			4.6992	3.5597	1.32011	medium		1.32011
				7.81751	3.6561	2.13821	medium		2.13821						small					15.2086	11.1796	1.36038	medium		1.36038			3.52732	1.11329	3.16839	small	3.16839				2.10173	1.50516	1.39635	small	1.39635
				6.14341	3.89447	1.57747	medium		1.57747						small					1.78509	2.33249	0.765316	small	0.765316				10.3192	5.72361	1.80292	medium		1.80292			1.73618	1.27838	1.35811	small	1.35811
				15.0705	4.33722	3.4747	medium		3.4747						small					30.0368	21.2366	1.41439	large			1.41439		7.01482	2.88836	2.42865	medium		2.42865			7.15561	4.65295	1.53787	medium		1.53787
				34.8922	15.2734	2.28451	large			2.28451					small					2.64638	1.27338	2.07823	small	2.07823				8.0289	4.02279	1.99585	medium		1.99585			2.84833	1.90051	1.49872	small	1.49872
				15.3173	6.59955	2.32097	medium		2.32097						small					12.6411	7.70681	1.64025	medium		1.64025			7.50932	4.56317	1.64564	medium		1.64564			24.8881	16.0917	1.54665	large			1.54665
				6.91324	3.5718	1.93551	medium		1.93551						small					45.3794	31.47	1.44199	large			1.44199		12.9118	9.13176	1.41394	medium		1.41394			2.56078	3.3254	0.770067	small	0.770067
				12.3034	5.48112	2.24469	medium		2.24469						small					5.21075	2.76041	1.88767	medium		1.88767			8.19854	3.81303	2.15014	medium		2.15014			3.69658	1.16148	3.18264	small	3.18264
				10.7522	4	2.68806	medium		2.68806						small								small					2.22225	1.20001	1.85187	small	1.85187				7.01129	4.8125	1.45689	medium		1.45689
				18.0486	8.03397	2.24653	large			2.24653					small								small					5.92204	3.20165	1.84969	medium		1.84969			2.7263	2.53619	1.07496	small	1.07496
				1.67179	1.49265	1.12002	small	1.12002							small								small					3.91615	3.00381	1.30372	small	1.30372				7.20372	3.32891	2.16399	medium		2.16399
				4.30725	1.52297	2.82819	medium		2.82819						small								small					4.52008	2.6656	1.69571	medium		1.69571			38.7153	20.4722	1.89112	large			1.89112
				31.1144	15.2643	2.03838	large			2.03838					small								small					10.2311	4.78377	2.13871	medium		2.13871			5.2974	3.23659	1.63672	medium		1.63672
				6.55918	3.68764	1.77869	medium		1.77869						small								small					10.6804	5.86291	1.82169	medium		1.82169			3.25112	3.34697	0.971361	small	0.971361
				39.3518	18.1901	2.16336	large			2.16336					small								small					8.00914	5.72361	1.39932	medium		1.39932			33.1162	21.8298	1.51702	large			1.51702
				4.84871	2.12282	2.28409	medium		2.28409						small								small					10.5584	5.62659	1.87653	medium		1.87653			2.13951	2.92302	0.731952	small	0.731952
				10.3098	5.91903	1.7418	medium		1.7418						small								small					12.4442	6.47375	1.92226	medium		1.92226			4.78182	2.74993	1.73889	medium		1.73889
				4.95368	2.4097	2.05572	medium		2.05572						small								small					8.2832	5.20274	1.59208	medium		1.59208			3.83682	2.67668	1.43343	small	1.43343
				23.3204	8.54587	2.72885	large			2.72885					small								small					3.50475	1.03795	3.37661	small	3.37661				1.42552	1.18607	1.20189	small	1.20189
				3.41633	2.42487	1.40887	small	1.40887							small								small					8.85578	5.66237	1.56397	medium		1.56397			2.63797	1.00946	2.61325	small	2.61325
							small								small								small					48.3412	31.7102	1.52447	large			1.52447		4.18878	2.92954	1.42984	medium		1.42984
							small								small								small					9.74192	5.13553	1.89696	medium		1.89696			14.5591	10.9059	1.33498	medium		1.33498
							small								small								small					1.03509	1.37995	0.750088	small	0.750088				2.40178	2.03748	1.1788	small	1.1788
							small								small								small					25.0484	14.6527	1.70948	large			1.70948		3.63325	2.29336	1.58425	small	1.58425
							small								small								small					16.81	9.57513	1.7556	large			1.7556		7.94733	2.99477	2.65374	medium		2.65374
							small								small								small					10.2772	3.85422	2.66647	medium		2.66647			2.16859	1.37471	1.57749	small	1.57749
							small								small								small					3.50537	2.40706	1.45629	small	1.45629				27.3573	23.4318	1.16753	large			1.16753
							small								small								small					5.51346	3.08566	1.7868	medium		1.7868			3.07554	2.75996	1.11434	small	1.11434
							small								small								small					5.81637	2.7366	2.1254	medium		2.1254			2.21398	1.49312	1.48279	small	1.48279
							small								small								small					4.4282	2.29161	1.93235	medium		1.93235			2.95324	2.27781	1.29653	small	1.29653
							small								small								small					43.278	19.9817	2.16588	large			2.16588		2.37379	1.62658	1.45938	small	1.45938
							small								small								small					30.2019	22.0825	1.36768	large			1.36768		41.547	30.9897	1.34067	large			1.34067
							small								small								small					10.1072	5.47158	1.84722	medium		1.84722			5.05579	2.90897	1.738	medium		1.738
							small								small								small					36.0973	19.7058	1.83181	large			1.83181		2.22023	1.61905	1.37132	small	1.37132
							small								small								small					2.53268	1.38971	1.82245	small	1.82245				9.6865	5.76426	1.68044	medium		1.68044
							small								small								small					7.04053	4.57022	1.54052	medium		1.54052			31.183	20.3252	1.5342	large			1.5342
							small								small								small					5.65237	3.54257	1.59556	medium		1.59556			40.5844	31.9696	1.26947	large			1.26947
							small								small								small					4.35734	1.6515	2.63841	medium		2.63841			3.05136	2.6832	1.13721	small	1.13721
							small								small								small					2.62738	2.0656	1.27197	small	1.27197				37.8233	31.5296	1.19961	large			1.19961
							small								small								small					23.4342	10.3339	2.26769	large			2.26769		4.22982	2.85027	1.48401	medium		1.48401
							small								small								small					11.3521	6.58107	1.72496	medium		1.72496			2.79506	1.52322	1.83497	small	1.83497
							small								small								small					3.5013	1.77399	1.97368	small	1.97368				36.3157	25.2501	1.43824	large			1.43824
							small								small								small					7.0722	3.37346	2.09642	medium		2.09642			4.47036	2.39722	1.86481	medium		1.86481
							small								small								small					6.864	2.64988	2.5903	medium		2.5903			4.24668	3.05648	1.3894	medium		1.3894
							small								small								small					62.3808	41.1775	1.51493	large			1.51493		5.85593	5.41406	1.08161	medium		1.08161
							small								small								small					54.6944	44.9336	1.21723	large			1.21723		3.80203	2.11174	1.80043	small	1.80043
							small								small								small					3.60321	1.75828	2.04928	small	2.04928				5.44064	2.87887	1.88985	medium		1.88985
							small								small								small					6.59872	1.67589	3.93744	medium		3.93744			17.1609	9.56378	1.79436	large			1.79436
							small								small								small					7.44943	4.04826	1.84015	medium		1.84015			3.50986	2.02745	1.73117	small	1.73117
							small								small								small					5.21494	2.02549	2.57466	medium		2.57466			15.5182	13.1727	1.17806	medium		1.17806
							small								small								small					2.15045	1.15339	1.86445	small	1.86445				23.6974	14.1801	1.67117	large			1.67117
							small								small								small					5.22121	3.53444	1.47724	medium		1.47724			3.80095	3.05046	1.24602	small	1.24602
							small								small								small					6.52628	2.70246	2.41494	medium		2.41494			3.82731	2.24118	1.70772	small	1.70772
							small								small								small					4.12718	2.54094	1.62427	medium		1.62427			8.74231	6.78576	1.28833	medium		1.28833
							small								small								small					8.91285	1.64445	5.41994	medium		5.41994			5.00714	2.63002	1.90384	medium		1.90384
							small								small								small					9.30763	6.41196	1.4516	medium		1.4516			2.38765	2.23416	1.0687	small	1.0687
							small								small								small					1.19971	1.21139	0.990358	small	0.990358				5.57137	4.05992	1.37229	medium		1.37229
							small								small								small					6.37953	3.55991	1.79205	medium		1.79205			1.73591	1.28791	1.34784	small	1.34784
							small								small								small					27.0515	19.7438	1.37013	large			1.37013		6.84931	4.41664	1.5508	medium		1.5508
							small								small								small					8.89842	5.15559	1.72598	medium		1.72598			8.15742	5.87865	1.38764	medium		1.38764
							small								small								small					3.66623	1.85421	1.97725	small	1.97725				5.73498	5.20233	1.10239	medium		1.10239
							small								small								small					3.12878	1.97887	1.58109	small	1.58109				7.35157	5.86761	1.25291	medium		1.25291
							small								small								small					3.56432	1.44229	2.4713	small	2.4713				2.16125	2.18449	0.989363	small	0.989363
							small								small								small					33.4991	16.1838	2.06991	large			2.06991		5.74476	3.37055	1.7044	medium		1.7044
							small								small								small					6.4482	2.55395	2.5248	medium		2.5248			1.99628	19.5972	0.101866	small	0.101866
							small								small								small					4.24696	1.26667	3.35284	medium		3.35284			3.51258	2.86281	1.22697	small	1.22697
							small								small								small					6.37545	3.08403	2.06725	medium		2.06725			2.84045	1.82225	1.55876	small	1.55876
							small								small								small					21.2593	12.3443	1.7222	large			1.7222		4.33012	3.9982	1.08302	medium		1.08302
							small								small								small					5.89005	2.50896	2.34761	medium		2.34761			3.41338	2.57382	1.32619	small	1.32619
							small								small								small					5.40998	2.7404	1.97416	medium		1.97416			37.5023	26.5194	1.41415	large			1.41415
							small								small								small					4.51788	1.17453	3.84653	medium		3.84653			24.959	19.3574	1.28938	large			1.28938
							small								small								small					17.3033	9.53936	1.81388	large			1.81388		3.36717	2.5367	1.32738	small	1.32738
							small								small								small					5.59938	3.64663	1.53549	medium		1.53549			5.65725	3.21803	1.75799	medium		1.75799
							small								small								small					9.82815	6.10736	1.60923	medium		1.60923			3.01657	1.21617	2.48039	small	2.48039
							small								small								small					7.81661	3.37129	2.31858	medium		2.31858			2.04248	1.69581	1.20442	small	1.20442
							small								small								small					5.27233	3.42549	1.53914	medium		1.53914			3.23019	1.11833	2.8884	small	2.8884
							small								small								small					8.33901	3.57943	2.32971	medium		2.32971			7.19366	3.2095	2.24137	medium		2.24137
							small								small								small					2.30347	1.7767	1.29648	small	1.29648				44.8479	21.7476	2.0622	large			2.0622
							small								small								small					10.3825	6.37131	1.62958	medium		1.62958			2.22159	3.77645	0.588275	small	0.588275
							small								small								small					8.12673	5.12252	1.58647	medium		1.58647			7.55514	3.87478	1.94982	medium		1.94982
							small								small								small					1.55279	1.13388	1.36944	small	1.36944				2.60128	2.08465	1.24783	small	1.24783
							small								small								small					11.9109	7.43907	1.60112	medium		1.60112			3.15517	2.91901	1.08091	small	1.08091
							small								small								small					7.85863	3.59785	2.18426	medium		2.18426			8.27375	3.85622	2.14556	medium		2.14556
							small								small								small					3.93214	2.34473	1.67701	small	1.67701				1.76716	2.11023	0.837423	small	0.837423
							small								small								small					7.54851	3.72252	2.0278	medium		2.0278			5.36345	3.76591	1.42421	medium		1.42421
							small								small								small					2.12066	1.82007	1.16515	small	1.16515				2.49664	1.76455	1.41489	small	1.41489
							small								small								small					7.5413	4.09759	1.84043	medium		1.84043			55.6348	44.7017	1.24458	large			1.24458
							small								small								small					4.39528	1.75177	2.50904	medium		2.50904			4.91419	2.45843	1.99891	medium		1.99891
							small								small								small					8.40236	4.83201	1.7389	medium		1.7389			15.1519	11.5927	1.30701	medium		1.30701
							small								small								small					28.9771	18.1275	1.59852	large			1.59852		4.29587	2.63052	1.63309	medium		1.63309
							small								small								small					26.763	14.3405	1.86626	large			1.86626		2.47082	1.60651	1.53801	small	1.53801
							small								small								small					6.0923	1.92196	3.16983	medium		3.16983			5.50233	4.46531	1.23224	medium		1.23224
							small								small								small					8.93166	2.26776	3.93853	medium		3.93853			2.27078	1.06716	2.12788	small	2.12788
							small								small								small					4.71449	2.62387	1.79677	medium		1.79677			2.57464	2.11575	1.21689	small	1.21689
							small								small								small					52.2654	34.1222	1.53172	large			1.53172		1.54892	1.0506	1.47431	small	1.47431
							small								small								small					2.64996	1.19892	2.21028	small	2.21028				6.30655	3.16836	1.99048	medium		1.99048
							small								small								small					4.88193	1.91166	2.55376	medium		2.55376			5.96981	2.91951	2.0448	medium		2.0448
							small								small								small					3.36458	1.56315	2.15243	small	2.15243				11.8997	7.56092	1.57384	medium		1.57384
							small								small								small					3.69539	3.35503	1.10145	small	1.10145				25.7152	20.5931	1.24873	large			1.24873
							small								small								small					4.92709	3.19568	1.54179	medium		1.54179			2.00253	1.15345	1.73612	small	1.73612
							small								small								small					4.69975	3.95829	1.18732	medium		1.18732			1.81472	1.26333	1.43646	small	1.43646
							small								small								small					3.21125	2.09324	1.5341	small	1.5341				3.66695	1.42037	2.58169	small	2.58169
							small								small								small					3.11529	2.3469	1.32741	small	1.32741				5.93583	4.13016	1.43719	medium		1.43719
							small								small								small					8.22017	4.2049	1.9549	medium		1.9549			8.63849	4.81802	1.79296	medium		1.79296
							small								small								small					63.6222	42.1667	1.50883	large			1.50883		6.29187	3.19545	1.96901	medium		1.96901
							small								small								small					9.00315	5.935	1.51696	medium		1.51696			2.65482	1.3145	2.01963	small	2.01963
							small								small								small					37.0903	26.8923	1.37922	large			1.37922		1.865	1.88095	0.991524	small	0.991524
							small								small								small					7.40459	4.28458	1.72819	medium		1.72819			6.8773	4.7257	1.4553	medium		1.4553
							small								small								small					3.54206	1.92142	1.84346	small	1.84346				1.4421	1.36618	1.05557	small	1.05557
							small								small								small					11.4954	6.07809	1.89128	medium		1.89128			3.86318	2.38668	1.61864	small	1.61864
							small								small								small					4.85747	2.12413	2.2868	medium		2.2868			3.23209	1.64765	1.96164	small	1.96164
							small								small								small					10.1094	4.85477	2.08237	medium		2.08237			25.8228	30.4012	0.849399	large			0.849399
							small								small								small					6.22588	2.15394	2.89046	medium		2.89046			4.04338	2.11023	1.91608	medium		1.91608
							small								small								small					17.5146	9.81795	1.78394	large			1.78394		17.4759	13.7642	1.26967	large			1.26967
							small								small								small					50.3508	35.6479	1.41245	large			1.41245		13.8495	6.75666	2.04975	medium		2.04975
							small								small								small					13.0921	7.57782	1.72768	medium		1.72768			3.47045	1.51369	2.29271	small	2.29271
							small								small								small					9.12105	2.89379	3.15194	medium		3.15194			7.97206	6.04422	1.31896	medium		1.31896
							small								small								small					9.85261	5.02767	1.95968	medium		1.95968			3.69712	1.63761	2.25763	small	2.25763
							small								small								small					6.69718	4.56697	1.46644	medium		1.46644			9.17173	4.84009	1.89495	medium		1.89495
							small								small								small					4.34385	1.99622	2.17604	medium		2.17604			1.47771	1.51921	0.972682	small	0.972682
							small								small								small					4.51694	2.44663	1.84619	medium		1.84619			1.85848	1.61453	1.15109	small	1.15109
							small								small								small					8.70965	4.0965	2.12612	medium		2.12612			1.24397	1.21366	1.02497	small	1.02497
							small								small								small					4.60537	3.05314	1.50841	medium		1.50841			3.20437	1.22771	2.61004	small	2.61004
							small								small								small					5.50311	4.00111	1.3754	medium		1.3754			22.691	13.8535	1.63792	large			1.63792
							small								small								small					4.35514	3.0965	1.40647	medium		1.40647			30.7497	19.5611	1.57199	large			1.57199
							small								small								small					5.32218	2.50679	2.12311	medium		2.12311			9.13667	5.41105	1.68852	medium		1.68852
							small								small								small					11.4496	7.02931	1.62884	medium		1.62884			5.77521	2.99075	1.93102	medium		1.93102
							small								small								small					20.7221	13.9486	1.48561	large			1.48561		8.82901	6.36281	1.3876	medium		1.3876
							small								small								small					13.7785	8.52471	1.6163	medium		1.6163			5.5942	2.79308	2.00288	medium		2.00288
							small								small								small					7.96368	6.61955	1.20305	medium		1.20305			3.67402	2.67066	1.3757	small	1.3757
							small								small								small					7.25125	3.61954	2.00337	medium		2.00337			10.5875	5.68599	1.86203	medium		1.86203
							small								small								small					13.3991	8.4239	1.5906	medium		1.5906			31.1022	20.8279	1.4933	large			1.4933
							small								small								small					12.1037	5.68405	2.12942	medium		2.12942			6.58405	3.82862	1.71969	medium		1.71969
							small								small								small					3.90768	1.87969	2.0789	small	2.0789				3.48268	1.78111	1.95535	small	1.95535
							small								small								small					14.4627	6.73554	2.14722	medium		2.14722			5.50097	3.65503	1.50504	medium		1.50504
							small								small								small					5.38019	1.54906	3.4732	medium		3.4732			5.98829	3.67761	1.62831	medium		1.62831
							small								small								small					5.49684	2.97021	1.85066	medium		1.85066			2.1493	2.68671	0.799974	small	0.799974
							small								small								small					3.11028	1.63578	1.9014	small	1.9014				2.60671	1.3406	1.94444	small	1.94444
							small								small								small					11.1097	5.9247	1.87515	medium		1.87515			7.10588	5.56809	1.27618	medium		1.27618
							small								small								small					8.92601	5.6976	1.56663	medium		1.56663			35.9547	27.7637	1.29503	large			1.29503
							small								small								small					2.77225	1.91438	1.44812	small	1.44812				2.46728	1.73595	1.42129	small	1.42129
							small								small								small					14.6242	9.54478	1.53216	medium		1.53216			6.87975	5.09145	1.35124	medium		1.35124
							small								small								small					42.7725	30.5026	1.40226	large			1.40226		2.72847	1.24477	2.19195	small	2.19195
							small								small								small					1.32357	2.26722	0.583783	small	0.583783				4.42442	2.62751	1.68389	medium		1.68389
							small								small								small					9.89211	8.20005	1.20635	medium		1.20635			41.235	40.6348	1.01477	large			1.01477
							small								small								small					4.45517	3.42875	1.29936	medium		1.29936			2.77304	1.3998	1.98103	small	1.98103
							small								small								small					5.52255	4.38485	1.25946	medium		1.25946			2.31563	1.28942	1.79587	small	1.79587
							small								small								small					14.3664	8.77024	1.63809	medium		1.63809			1.85169	1.46251	1.2661	small	1.2661
							small								small								small					3.03596	2.62874	1.15491	small	1.15491				34.3091	28.5343	1.20238	large			1.20238
							small								small								small					11.5286	5.85207	1.97001	medium		1.97001			7.69565	5.40252	1.42446	medium		1.42446
							small								small								small					10.0483	4.63634	2.16728	medium		2.16728			8.20199	5.5149	1.48724	medium		1.48724
							small								small								small					17.207	10.8266	1.58932	large			1.58932		9.51908	4.6981	2.02615	medium		2.02615
							small								small								small					4.16982	3.4759	1.19964	medium		1.19964			42.4575	34.3227	1.23701	large			1.23701
							small								small								small					12.8099	7.56102	1.6942	medium		1.6942			18.2092	11.4889	1.58494	large			1.58494
							small								small								small					7.92448	4.51331	1.7558	medium		1.7558			6.08287	3.48745	1.74421	medium		1.74421
							small								small								small					17.8094	7.44991	2.39055	large			2.39055		1.67611	1.23122	1.36134	small	1.36134
							small								small								small					4.53513	1.93118	2.34837	medium		2.34837			1.91148	1.28591	1.48648	small	1.48648
							small								small								small					25.493	14.4668	1.76218	large			1.76218		11.2688	2.49054	4.52466	medium		4.52466
							small								small								small					3.8713	2.99677	1.29183	small	1.29183				4.6462	2.39923	1.93654	medium		1.93654
							small								small								small					3.691	2.50191	1.47527	small	1.47527				3.21334	1.46251	2.19714	small	2.19714
							small								small								small					15.775	7.82769	2.01528	medium		2.01528			9.02171	3.18793	2.82996	medium		2.82996
							small								small								small					8.98716	5.47104	1.64268	medium		1.64268			15.2704	10.8371	1.40908	medium		1.40908
							small								small								small					13.1771	6.73283	1.95713	medium		1.95713			2.63009	1.6055	1.63817	small	1.63817
							small								small								small					6.61502	5.21792	1.26775	medium		1.26775			8.17074	5.32977	1.53304	medium		1.53304
							small								small								small					9.35686	3.96263	2.36128	medium		2.36128			48.3379	37.9611	1.27335	large			1.27335
							small								small								small					7.70373	4.31331	1.78604	medium		1.78604			3.37234	1.74348	1.93426	small	1.93426
							small								small								small					2.54648	1.29594	1.96496	small	1.96496				13.0895	10.6445	1.2297	medium		1.2297
							small								small								small					1.46185	1.00868	1.44928	small	1.44928				1.90088	1.05662	1.79901	small	1.79901
							small								small								small					3.53955	2.78321	1.27175	small	1.27175				2.6309	2.08916	1.25931	small	1.25931
							small								small								small					4.69128	3.05639	1.53491	medium		1.53491			11.4308	4.82203	2.37054	medium		2.37054
							small								small								small					3.92994	2.0412	1.92531	small	1.92531				10.0265	7.33464	1.36701	medium		1.36701
							small								small								small					1.7149	1.60001	1.07181	small	1.07181				26.7784	6.7978	3.93927	large			3.93927
							small								small								small					5.20804	2.89649	1.79805	medium		1.79805			16.9495	12.0864	1.40236	large			1.40236
							small								small								small					6.68683	5.53012	1.20917	medium		1.20917			4.3562	3.01885	1.443	medium		1.443
							small								small								small					26.2779	18.031	1.45737	large			1.45737		54.1226	45.4147	1.19174	large			1.19174
							small								small								small					2.46119	1.57454	1.56312	small	1.56312				2.34172	1.06716	2.19435	small	2.19435
							small								small								small					6.20017	6.535	0.948764	medium		0.948764			39.6415	29.4484	1.34613	large			1.34613
							small								small								small					1.8328	1.47372	1.24366	small	1.24366				2.38575	1.15697	2.06207	small	2.06207
							small								small								small					1.43802	1.26017	1.14113	small	1.14113				5.57517	2.83371	1.96744	medium		1.96744
							small								small								small					52.4009	33.4479	1.56664	large			1.56664		9.12933	5.50888	1.6572	medium		1.6572
							small								small								small					9.4155	5.38919	1.74711	medium		1.74711			12.3701	9.03297	1.36944	medium		1.36944
							small								small								small					6.7624	3.74203	1.80715	medium		1.80715			5.31099	3.25666	1.63081	medium		1.63081
							small								small								small					5.61317	4.32848	1.2968	medium		1.2968			5.73879	4.58873	1.25063	medium		1.25063
							small								small								small					2.54554	1.83307	1.38867	small	1.38867				2.46049	1.83629	1.33992	small	1.33992
							small								small								small					1.7726	1.34798	1.31501	small	1.31501				3.96945	2.55175	1.55558	small	1.55558
							small								small								small					3.23947	1.7095	1.89498	small	1.89498				6.47452	4.11812	1.5722	medium		1.5722
							small								small								small					5.16383	5.91331	0.873256	medium		0.873256			4.1703	3.37657	1.23507	medium		1.23507
							small								small								small					53.2209	46.3217	1.14894	large			1.14894		3.44164	3.08357	1.11612	small	1.11612
							small								small								small					29.4139	17.8202	1.6506	large			1.6506		4.11567	2.3054	1.78523	medium		1.78523
							small								small								small					43.484	30.9178	1.40644	large			1.40644		2.02835	3.16184	0.641509	small	0.641509
							small								small								small					34.8063	23.7373	1.46632	large			1.46632		2.89997	1.6346	1.77411	small	1.77411
							small								small								small					19.6607	11.1074	1.77006	large			1.77006		42.747	31.6425	1.35094	large			1.35094
							small								small								small					4.91423	1.63632	3.00321	medium		3.00321			43.0272	31.1533	1.38114	large			1.38114
							small								small								small					10.9259	7.84124	1.3934	medium		1.3934			6.43483	4.01577	1.60239	medium		1.60239
							small								small								small					3.67721	1.81844	2.02218	small	2.02218				8.15253	5.62578	1.44914	medium		1.44914
							small								small								small					5.86152	3.16587	1.85147	medium		1.85147			4.9699	3.66506	1.35602	medium		1.35602
							small								small								small					14.3084	8.35452	1.71265	medium		1.71265			2.55562	2.24771	1.13699	small	1.13699
							small								small								small					14.3319	7.45913	1.92139	medium		1.92139			11.8717	10.9249	1.08666	medium		1.08666
							small								small								small					7.39988	4.72035	1.56765	medium		1.56765			6.89008	5.30318	1.29924	medium		1.29924
							small								small								small					1.55906	1.42548	1.0937	small	1.0937				10.8633	6.74512	1.61055	medium		1.61055
							small								small								small					5.3363	3.31113	1.61162	medium		1.61162			3.63597	1.57741	2.30503	small	2.30503
							small								small								small					8.8586	5.09	1.74039	medium		1.74039			5.24006	2.69323	1.94564	medium		1.94564
							small								small								small					18.0693	9.38217	1.92592	large			1.92592		4.43176	2.86181	1.54859	medium		1.54859
							small								small								small					1.16459	1.0103	1.15271	small	1.15271				4.89842	2.48552	1.97078	medium		1.97078
							small								small								small					3.97666	2.42603	1.63916	small	1.63916				5.07073	2.38919	2.12237	medium		2.12237
							small								small								small					3.17425	2.85313	1.11255	small	1.11255				2.57736	1.70936	1.50779	small	1.50779
							small								small								small					4.42789	3.28349	1.34853	medium		1.34853			12.3049	8.04307	1.52988	medium		1.52988
							small								small								small					7.37574	4.01195	1.83844	medium		1.83844			6.6827	5.07038	1.31799	medium		1.31799
							small								small								small					6.87779	3.81086	1.80479	medium		1.80479			10.3369	6.37686	1.621	medium		1.621
							small								small								small					4.04439	2.35557	1.71695	medium		1.71695			2.30014	1.35765	1.6942	small	1.6942
							small								small								small					11.4239	5.99353	1.90604	medium		1.90604			4.17058	3.18893	1.30783	medium		1.30783
							small								small								small					3.35831	1.28022	2.62322	small	2.62322				4.363	2.86883	1.52083	medium		1.52083
							small								small								small					11.7814	7.77403	1.51548	medium		1.51548			4.59348	2.58536	1.77672	medium		1.77672
							small								small								small					4.81138	1.7095	2.8145	medium		2.8145			28.115	20.9488	1.34208	large			1.34208
							small								small								small					3.50882	1.45909	2.40481	small	2.40481				5.54446	2.52164	2.19875	medium		2.19875
							small								small								small					20.5738	13.3762	1.53809	large			1.53809		2.55507	1.2257	2.08458	small	2.08458
							small								small								small					4.87127	2.17075	2.24406	medium		2.24406			5.58278	3.00831	1.85579	medium		1.85579
							small								small								small					25.2701	15.0901	1.67462	large			1.67462		3.75012	1.10228	3.40215	small	3.40215
							small								small								small					6.66802	3.43146	1.9432	medium		1.9432			3.35684	2.70377	1.24154	small	1.24154
							small								small								small					16.8703	7.91333	2.13188	large			2.13188		3.87704	1.82275	2.12703	small	2.12703
							small								small								small					5.96876	2.78647	2.14205	medium		2.14205			3.42805	2.48402	1.38004	small	1.38004
							small								small								small					34.0048	22.1936	1.53219	large			1.53219		2.06477	1.55483	1.32797	small	1.32797
							small								small								small					5.33096	4.48946	1.18744	medium		1.18744			4.85113	2.76699	1.75322	medium		1.75322
							small								small								small					8.06402	4.61249	1.7483	medium		1.7483			15.6914	7.74254	2.02664	medium		2.02664
							small								small								small					3.70135	3.4526	1.07205	small	1.07205				10.1311	7.50021	1.35078	medium		1.35078
							small								small								small					16.1732	10.7166	1.50917	large			1.50917		5.89425	3.61138	1.63213	medium		1.63213
							small								small								small					8.15495	4.03634	2.02038	medium		2.02038			14.4849	8.27486	1.75047	medium		1.75047
							small								small								small					8.6507	3.73607	2.31546	medium		2.31546			5.58305	2.32999	2.39617	medium		2.39617
							small								small								small					17.017	9.75182	1.74501	large			1.74501		7.83889	4.56665	1.71655	medium		1.71655
							small								small								small					3.89106	1.98592	1.95932	small	1.95932				3.71968	1.3712	2.71272	small	2.71272
							small								small								small					10.512	4.93499	2.1301	medium		2.1301			9.29866	4.54056	2.04791	medium		2.04791
							small								small								small					28.925	15.3513	1.88421	large			1.88421		24.7394	19.6865	1.25667	large			1.25667
							small								small								small					4.92082	1.93714	2.54025	medium		2.54025			3.12691	2.93958	1.06373	small	1.06373
							small								small								small					10.4164	4.68404	2.22381	medium		2.22381			10.9672	7.50272	1.46176	medium		1.46176
							small								small								small					8.73536	3.35991	2.59988	medium		2.59988			3.57482	2.00337	1.7844	small	1.7844
							small								small								small					7.03928	4.19027	1.67991	medium		1.67991			7.02162	4.63439	1.51511	medium		1.51511
							small								small								small					31.5273	19.4473	1.62117	large			1.62117		3.51394	1.67624	2.09632	small	2.09632
							small								small								small					7.01513	3.03254	2.31329	medium		2.31329			3.40006	2.12529	1.59981	small	1.59981
							small								small								small					6.40431	4.32306	1.48143	medium		1.48143			6.45386	4.1728	1.54665	medium		1.54665
							small								small								small					11.9911	5.71277	2.09901	medium		2.09901			3.42669	2.81214	1.21854	small	1.21854
							small								small								small					5.74738	2.56912	2.2371	medium		2.2371			1.63344	1.64263	0.994404	small	0.994404
							small								small								small					6.03963	2.82278	2.1396	medium		2.1396			4.56222	2.51211	1.81609	medium		1.81609
							small								small								small					34.0581	19.6662	1.73181	large			1.73181		10.341	5.30569	1.94903	medium		1.94903
							small								small								small					3.63801	1.73443	2.09753	small	2.09753				5.91627	4.16076	1.42192	medium		1.42192
							small								small								small					5.76087	2.88511	1.99676	medium		1.99676			2.95161	2.19954	1.34192	small	1.34192
							small								small								small					7.45287	3.69	2.01975	medium		2.01975			6.45875	4.28519	1.50723	medium		1.50723
							small								small								small					17.1587	11.5773	1.4821	large			1.4821		2.05417	1.97176	1.0418	small	1.0418
							small								small								small					5.25602	3.84826	1.36582	medium		1.36582			6.70146	5.13561	1.3049	medium		1.3049
							small								small								small					7.14025	4.0358	1.76923	medium		1.76923			7.54916	4.83307	1.56198	medium		1.56198
							small								small								small					14.347	9.18326	1.5623	medium		1.5623			4.46003	2.95112	1.5113	medium		1.5113
							small								small								small					9.5635	4.52144	2.11515	medium		2.11515			3.0307	1.51469	2.00087	small	2.00087
							small								small								small					10.1853	5.24664	1.9413	medium		1.9413			2.88122	1.59346	1.80815	small	1.80815
							small								small								small					7.83605	3.75233	2.08832	medium		2.08832			31.9225	23.5392	1.35614	large			1.35614
							small								small								small					8.68394	5.81359	1.49373	medium		1.49373			6.33726	5.00516	1.26615	medium		1.26615
							small								small								small					5.27828	6.94313	0.760217	medium		0.760217			4.88674	2.53268	1.92947	medium		1.92947
							small								small								small					6.64262	4.0591	1.63647	medium		1.63647			40.9594	30.3365	1.35017	large			1.35017
							small								small								small					12.105	7.21468	1.67782	medium		1.67782			1.31545	1.88145	0.699169	small	0.699169
							small								small								small					11.2621	7.11766	1.58227	medium		1.58227			9.50141	7.00602	1.35618	medium		1.35618
							small								small								small					6.88971	3.81195	1.8074	medium		1.8074			1.30648	1.12486	1.16147	small	1.16147
							small								small								small					4.06666	2.38755	1.70328	medium		1.70328			4.03223	1.66721	2.41855	medium		2.41855
							small								small								small					13.9255	11.5854	1.20199	medium		1.20199			3.49872	1.55935	2.24371	small	2.24371
							small								small								small					6.44695	2.7534	2.34145	medium		2.34145			5.55805	3.94854	1.40762	medium		1.40762
							small								small								small					9.05458	5.04773	1.79379	medium		1.79379			10.9313	8.09174	1.35092	medium		1.35092
							small								small								small					1.95478	1.13551	1.7215	small	1.7215				2.63036	1.93915	1.35645	small	1.35645
							small								small								small					2.93217	1.44933	2.02312	small	2.02312				1.70655	1.42037	1.20149	small	1.20149
							small								small								small					6.05969	2.49704	2.42676	medium		2.42676			2.0066	1.88496	1.06453	small	1.06453
							small								small								small					6.45322	2.41085	2.67674	medium		2.67674			5.07617	4.03433	1.25824	medium		1.25824
							small								small								small					6.94301	4.60003	1.50934	medium		1.50934			4.48694	1.00244	4.47603	medium		4.47603
							small								small								small					3.34107	1.68456	1.98334	small	1.98334				7.71849	5.6609	1.36347	medium		1.36347
							small								small								small					6.85177	3.88729	1.76261	medium		1.76261			35.3978	26.6734	1.32708	large			1.32708
							small								small								small					4.88539	3.79948	1.2858	medium		1.2858			10.4181	6.06228	1.71852	medium		1.71852
							small								small								small					7.77397	4.61954	1.68284	medium		1.68284			5.43112	2.6245	2.0694	medium		2.0694
							small								small								small					3.63926	2.38701	1.52461	small	1.52461				3.27205	2.4504	1.33531	small	1.33531
							small								small								small					3.35611	2.14148	1.5672	small	1.5672				2.37841	1.459	1.63016	small	1.63016
							small								small								small					6.95901	3.25368	2.13881	medium		2.13881			2.50615	1.81271	1.38254	small	1.38254
							small								small								small					3.23821	2.59893	1.24598	small	1.24598				14.8254	10.6038	1.39812	medium		1.39812
							small								small								small					1.92154	1.46939	1.30772	small	1.30772				4.89434	2.63503	1.85741	medium		1.85741
							small								small								small					7.8671	4.12252	1.90832	medium		1.90832			4.33501	1.95671	2.21546	medium		2.21546
							small								small								small					9.71119	6.84611	1.4185	medium		1.4185			9.94633	5.52845	1.79912	medium		1.79912
							small								small								small					6.42092	2.61844	2.45219	medium		2.45219			15.4269	9.91398	1.55608	medium		1.55608
							small								small								small					5.83173	3.20381	1.82025	medium		1.82025			5.99807	5.45921	1.09871	medium		1.09871
							small								small								small					8.45128	3.30083	2.56035	medium		2.56035			17.8173	9.81414	1.81547	large			1.81547
							small								small								small					3.24919	2.38701	1.3612	small	1.3612				11.5232	10.0921	1.14181	medium		1.14181
							small								small								small					6.17289	2.52901	2.44083	medium		2.44083			2.0327	1.91707	1.06031	small	1.06031
							small								small								small					12.3417	5.36805	2.2991	medium		2.2991			35.6207	29.6145	1.20281	large			1.20281
							small								small								small					3.1247	2.36533	1.32104	small	1.32104				8.46699	5.03024	1.68322	medium		1.68322
							small								small								small					7.95741	4.80653	1.65554	medium		1.65554			7.19203	4.43872	1.6203	medium		1.6203
							small								small								small					4.27926	1.23903	3.45371	medium		3.45371			39.395	35.2674	1.11704	large			1.11704
							small								small								small					5.00234	2.77183	1.80471	medium		1.80471			9.42069	5.49634	1.71399	medium		1.71399
							small								small								small					7.58802	4.76805	1.59143	medium		1.59143			9.0391	2.90546	3.11108	medium		3.11108
							small								small								small					11.682	6.664	1.753	medium		1.753			4.58097	2.77953	1.64811	medium		1.64811
							small								small								small					4.13439	2.81411	1.46916	medium		1.46916			13.3418	8.74648	1.52539	medium		1.52539
							small								small								small					8.71969	3.72143	2.3431	medium		2.3431			1.58343	2.06608	0.766393	small	0.766393
							small								small								small					6.06691	3.81683	1.58952	medium		1.58952			19.0365	11.4252	1.66619	large			1.66619
							small								small								small					56.6698	43.4252	1.305	large			1.305		35.5405	25.3614	1.40136	large			1.40136
							small								small								small					4.98698	2.16912	2.29908	medium		2.29908			1.23337	1.71036	0.721116	small	0.721116
							small								small								small					8.09412	4.99027	1.62198	medium		1.62198			1.48776	1.26534	1.17578	small	1.17578
							small								small								small					6.80943	4.71873	1.44307	medium		1.44307			6.70146	3.71122	1.80573	medium		1.80573
							small								small								small					5.19425	2.17508	2.38807	medium		2.38807			10.9027	5.97398	1.82504	medium		1.82504
							small								small								small					3.57185	2.31167	1.54514	small	1.54514				7.23307	4.32232	1.67343	medium		1.67343
							small								small								small					5.66993	2.35286	2.4098	medium		2.4098			42.0746	29.2668	1.43762	large			1.43762
							small								small								small					3.13881	1.1225	2.79627	small	2.79627				1.94491	2.22312	0.874856	small	0.874856
							small								small								small					5.42786	2.53281	2.14302	medium		2.14302			1.88321	1.04659	1.79938	small	1.79938
							small								small								small					2.2395	1.18808	1.88497	small	1.88497				2.34416	3.15983	0.741864	small	0.741864
							small								small								small					6.86494	3.78539	1.81353	medium		1.81353			3.35005	2.19753	1.52446	small	1.52446
							small								small								small					4.22156	1.89866	2.22345	medium		2.22345			16.8041	17.8979	0.938887	large			0.938887
							small								small								small					14.4417	8.01848	1.80105	medium		1.80105			14.6319	6.43355	2.27432	medium		2.27432
							small								small								small					2.8428	2.24879	1.26415	small	1.26415				13.2746	8.55633	1.55144	medium		1.55144
							small								small								small					9.91125	4.56317	2.17201	medium		2.17201			3.3669	1.897	1.77485	small	1.77485
							small								small								small					5.50939	3.12902	1.76074	medium		1.76074			4.05724	2.62701	1.54444	medium		1.54444
							small								small								small					6.68777	4.02225	1.66269	medium		1.66269			18.9982	10.8216	1.75558	large			1.75558
							small								small								small					7.78934	5.38377	1.44682	medium		1.44682			3.81236	1.82726	2.08638	small	2.08638
							small								small								small					1.82716	1.36695	1.33667	small	1.33667				6.42396	4.7272	1.35893	medium		1.35893
							small								small								small					7.01106	5.50844	1.27279	medium		1.27279			4.34832	4.00523	1.08566	medium		1.08566
							small								small								small					8.40205	4.42659	1.89809	medium		1.89809			5.66812	3.36654	1.68366	medium		1.68366
							small								small								small					8.34403	4.61575	1.80773	medium		1.80773			3.16632	1.33959	2.36365	small	2.36365
							small								small								small					7.78619	3.83146	2.03217	medium		2.03217			5.73063	2.44287	2.34586	medium		2.34586
							small								small								small					15.7841	9.14748	1.72551	medium		1.72551			2.20039	1.41234	1.55797	small	1.55797
							small								small								small					6.34692	2.8347	2.23901	medium		2.23901			14.9518	9.76798	1.5307	medium		1.5307
							small								small								small					6.58273	2.69162	2.44564	medium		2.44564			5.66405	3.20298	1.76837	medium		1.76837
							small								small								small					33.0663	10.2581	3.22345	large			3.22345		10.4198	6.78626	1.53542	medium		1.53542
							small								small								small					4.54422	3.08728	1.47192	medium		1.47192			12.5079	6.15911	2.0308	medium		2.0308
							small								small								small					6.36197	3.5778	1.77818	medium		1.77818			2.70809	3.00179	0.902158	small	0.902158
							small								small								small					6.22118	5.59028	1.11286	medium		1.11286			6.90503	4.60529	1.49937	medium		1.49937
							small								small								small					3.19714	1.96532	1.62677	small	1.62677				29.5449	24.3194	1.21487	large			1.21487
							small								small								small					7.97591	3.79189	2.10341	medium		2.10341			18.016	22.8167	0.789595	large			0.789595
							small								small								small					4.40406	2.2114	1.99153	medium		1.99153			28.4977	23.2221	1.22718	large			1.22718
							small								small								small					3.7857	2.374	1.59465	small	1.59465				8.09953	5.29465	1.52976	medium		1.52976
							small								small								small					2.05575	1.32088	1.55635	small	1.55635				1.41275	1.07218	1.31765	small	1.31765
							small								small								small					5.14314	2.22982	2.30652	medium		2.30652			3.99527	2.31343	1.72699	small	1.72699
							small								small								small					5.39807	2.82007	1.91416	medium		1.91416			29.4751	23.6144	1.24818	large			1.24818
							small								small								small					5.39901	2.4179	2.23293	medium		2.23293			3.31879	2.92804	1.13345	small	1.13345
							small								small								small					1.82528	1.29269	1.412	small	1.412				3.8553	2.53318	1.52192	small	1.52192
							small								small								small					22.1909	14.2608	1.55608	large			1.55608		22.0735	10.1242	2.18027	large			2.18027
							small								small								small					3.06199	2.13606	1.43348	small	1.43348				44.6943	31.9345	1.39956	large			1.39956
							small								small								small					26.9543	14.367	1.87612	large			1.87612		32.1622	29.768	1.08043	large			1.08043
							small								small								small					6.80034	3.59135	1.89353	medium		1.89353			3.70935	2.71129	1.36811	small	1.36811
							small								small								small					2.23793	2.36804	0.945058	small	0.945058				4.89543	4.76684	1.02698	medium		1.02698
							small								small								small					3.24135	1.37453	2.35814	small	2.35814				4.36083	3.88331	1.12297	medium		1.12297
							small								small								small					21.2034	13.1898	1.60757	large			1.60757		5.16233	3.24512	1.59079	medium		1.59079
							small								small								small					25.1811	13.7052	1.83733	large			1.83733		19.1604	10.0123	1.91369	large			1.91369
							small								small								small					4.08955	2.65639	1.53952	medium		1.53952			5.56539	3.40969	1.63223	medium		1.63223
							small								small								small					9.07402	7.04991	1.28711	medium		1.28711			19.5445	15.1399	1.29093	large			1.29093
							small								small								small					53.6765	31.5384	1.70194	large			1.70194		25.2262	21.739	1.16041	large			1.16041
							small								small								small					7.75296	4.39244	1.76507	medium		1.76507			46.0089	38.1643	1.20555	large			1.20555
							small								small								small					5.44353	3.75395	1.45008	medium		1.45008			2.99455	1.89098	1.5836	small	1.5836
							small								small								small					7.78777	3.95721	1.968	medium		1.968			2.84589	3.34748	0.850159	small	0.850159
							small								small								small					1.50419	3.42387	0.439323	small	0.439323				17.9524	12.7497	1.40806	large			1.40806
							small								small								small					6.89755	3.98864	1.7293	medium		1.7293			7.22628	4.9896	1.44827	medium		1.44827
							small								small								small					14.2074	7.56698	1.87756	medium		1.87756			10.5021	5.44868	1.92746	medium		1.92746
							small								small								small					32.2003	22.198	1.45059	large			1.45059		17.9918	9.87485	1.82198	large			1.82198
							small								small								small					24.2516	14.7302	1.64639	large			1.64639		34.6238	27.3698	1.26504	large			1.26504
							small								small								small					35.335	23.5254	1.502	large			1.502		27.1975	27.9674	0.972472	large			0.972472
							small								small								small					10.3208	5.91061	1.74614	medium		1.74614			2.77304	1.55533	1.78293	small	1.78293
							small								small								small					4.92834	2.77888	1.7735	medium		1.7735			5.87495	4.1708	1.40859	medium		1.40859
							small								small								small					1.68166	1.06179	1.58379	small	1.58379				1.55788	1.00093	1.55644	small	1.55644
							small								small								small					5.54889	3.23471	1.71542	medium		1.71542			1.73591	1.43943	1.20596	small	1.20596
							small								small								small					2.12254	2.82495	0.751355	small	0.751355				1.50543	1.38625	1.08597	small	1.08597
							small								small								small					46.2186	34.5233	1.33877	large			1.33877		1.89898	1.5749	1.20578	small	1.20578
							small								small								small					6.24689	4.61737	1.35291	medium		1.35291			7.03603	8.74197	0.804857	medium		0.804857
							small								small								small					7.55792	5.15071	1.46736	medium		1.46736			1.74189	1.1956	1.45692	small	1.45692
							small								small								small					8.86769	2.85314	3.10805	medium		3.10805			3.47072	1.82576	1.90098	small	1.90098
							small								small								small					61.0642	46.1244	1.3239	large			1.3239		6.7425	4.57117	1.475	medium		1.475
							small								small								small					26.2381	16.9649	1.54661	large			1.54661		14.8189	10.1247	1.46364	medium		1.46364
							small								small								small					1.22323	3.63471	0.336541	small	0.336541				37.074	25.6364	1.44615	large			1.44615
							small								small								small					4.9782	2.45313	2.02932	medium		2.02932			23.5544	19.9057	1.1833	large			1.1833
							small								small								small					1.43551	1.29107	1.11188	small	1.11188				3.84633	2.6245	1.46555	small	1.46555
							small								small								small					2.24452	1.74256	1.28806	small	1.28806				41.9224	35.8479	1.16945	large			1.16945
							small								small								small					1.07836	1.31112	0.822471	small	0.822471				37.0954	21.2694	1.74407	large			1.74407
							small								small								small					5.17292	2.19351	2.35829	medium		2.35829			3.34597	2.7996	1.19516	small	1.19516
							small								small								small					2.98548	1.25041	2.38759	small	2.38759				1.27604	2.29788	0.555313	small	0.555313
							small								small								small					3.15825	1.87806	1.68166	small	1.68166				3.83003	1.29093	2.96689	small	2.96689
							small								small								small					7.44535	3.47102	2.145	medium		2.145			45.7008	36.8303	1.24085	large			1.24085
							small								small								small					9.38163	5.40762	1.73489	medium		1.73489			4.45459	2.40775	1.8501	medium		1.8501
							small								small								small					23.2811	14.9285	1.5595	large			1.5595		36.4461	24.4804	1.48879	large			1.48879
							small								small								small					6.89943	1.99676	3.45531	medium		3.45531			1.23799	1.46853	0.843011	small	0.843011
							small								small								small					5.09704	4.05097	1.25823	medium		1.25823			33.9775	22.4138	1.51592	large			1.51592
							small								small								small					1.90775	1.11329	1.71362	small	1.71362				6.52779	4.48638	1.45502	medium		1.45502
							small								small								small					4.23254	2.50029	1.69282	medium		1.69282			37.1965	26.3779	1.41014	large			1.41014
							small								small								small					5.20177	2.5198	2.06436	medium		2.06436			6.13288	4.34891	1.41021	medium		1.41021
							small								small								small					7.61311	5.21033	1.46116	medium		1.46116			2.86844	2.00236	1.43253	small	1.43253
							small								small								small					31.0617	17.8315	1.74195	large			1.74195		8.57924	5.24448	1.63586	medium		1.63586
							small								small								small					7.75704	5.83798	1.32872	medium		1.32872			4.78481	3.56472	1.34227	medium		1.34227
							small								small								small					11.136	6.42931	1.73207	medium		1.73207			6.98602	3.19746	2.18486	medium		2.18486
							small								small								small					10.1213	5.86237	1.72649	medium		1.72649			3.98902	2.29637	1.7371	small	1.7371
							small								small								small					7.63694	2.11329	3.61376	medium		3.61376			5.96057	3.2968	1.80798	medium		1.80798
							small								small								small					3.52419	2.06234	1.70883	small	1.70883				10.9511	6.75014	1.62236	medium		1.62236
							small								small								small					10.682	7.3865	1.44615	medium		1.44615			5.89914	3.18542	1.85192	medium		1.85192
							small								small								small					16.6683	9.10141	1.8314	large			1.8314		4.50678	3.14127	1.4347	medium		1.4347
							small								small								small					4.33382	2.55611	1.69547	medium		1.69547			6.28019	3.29479	1.90609	medium		1.90609
							small								small								small					5.59467	2.2011	2.54176	medium		2.54176			47.098	45.9254	1.02553	large			1.02553
							small								small								small					1.39694	2.57725	0.542028	small	0.542028				4.49591	2.36511	1.90093	medium		1.90093
							small								small								small					34.0089	25.8083	1.31775	large			1.31775		17.6724	11.0298	1.60224	large			1.60224
							small								small								small					23.4439	14.2424	1.64607	large			1.64607		49.4601	39.6805	1.24646	large			1.24646
							small								small								small					8.27536	4.35396	1.90065	medium		1.90065			6.28182	4.10156	1.53157	medium		1.53157
							small								small								small					6.35068	4.46669	1.42179	medium		1.42179			1.8949	1.25029	1.51557	small	1.51557
							small								small								small					8.41929	4.27753	1.96826	medium		1.96826			9.00404	4.8145	1.87019	medium		1.87019
							small								small								small					21.9961	12.3296	1.78401	large			1.78401		2.31644	3.25666	0.711294	small	0.711294
							small								small								small					32.4853	20.4603	1.58772	large			1.58772		14.1791	10.9224	1.29817	medium		1.29817
							small								small								small					7.65042	4.71331	1.62315	medium		1.62315			42.0131	27.2569	1.54137	large			1.54137
							small								small								small					3.13442	1.82874	1.71398	small	1.71398				34.4031	32.4522	1.06011	large			1.06011
							small								small								small					7.58834	3.49379	2.17195	medium		2.17195			2.43549	1.07268	2.27047	small	2.27047
							small								small								small					2.04791	1.29486	1.58157	small	1.58157				9.2693	6.21681	1.49101	medium		1.49101
							small								small								small					5.71665	2.78322	2.05397	medium		2.05397			3.89444	1.312	2.96833	small	2.96833
							small								small								small					3.21658	2.24554	1.43243	small	1.43243				18.2266	11.5125	1.58321	large			1.58321
							small								small								small					6.8364	3.67374	1.86089	medium		1.86089			1.16352	1.24126	0.937374	small	0.937374
							small								small								small					3.70167	2.0656	1.79206	small	1.79206				3.26036	1.98982	1.63852	small	1.63852
							small								small								small					8.95361	5.12415	1.74733	medium		1.74733			29.4998	20.5053	1.43864	large			1.43864
							small								small								small					5.97001	2.66289	2.24193	medium		2.24193			58.7278	47.4115	1.23868	large			1.23868
							small								small								small					10.2922	4.31981	2.38256	medium		2.38256			4.96827	2.17044	2.28906	medium		2.28906
							small								small								small					5.99384	3.50897	1.70815	medium		1.70815			7.51546	3.65403	2.05676	medium		2.05676
							small								small								small					4.56397	1.80814	2.52412	medium		2.52412			2.5336	1.17954	2.14795	small	2.14795
							small								small								small					1.04105	1.32792	0.783966	small	0.783966				7.74784	3.52408	2.19854	medium		2.19854
							small								small								small					4.85968	1.63632	2.96987	medium		2.96987			11.9532	6.48473	1.84328	medium		1.84328
							small								small								small					8.98371	4.57618	1.96315	medium		1.96315			6.1375	2.79408	2.19661	medium		2.19661
							small								small								small					4.02401	2.14581	1.87529	medium		1.87529			4.47987	3.46036	1.29462	medium		1.29462
							small								small								small					4.26107	2.89812	1.47029	medium		1.47029			5.28735	3.6164	1.46205	medium		1.46205
							small								small								small					6.58178	3.95233	1.66529	medium		1.66529			9.76613	4.42266	2.2082	medium		2.2082
							small								small								small					3.61073	1.34039	2.6938	small	2.6938				6.02987	4.37751	1.37747	medium		1.37747
							small								small								small					6.49054	3.20923	2.02246	medium		2.02246			4.84705	3.13976	1.54376	medium		1.54376
							small								small								small					10.8284	4.82117	2.24602	medium		2.24602			19.6179	10.5652	1.85684	large			1.85684
							small								small								small					9.91783	4.94095	2.00727	medium		2.00727			3.98359	1.36668	2.91478	small	2.91478
							small								small								small					15.2629	7.74259	1.97129	medium		1.97129			5.62382	5.50387	1.02179	medium		1.02179
							small								small								small					46.2067	28.1471	1.64162	large			1.64162		39.8206	31.8773	1.24919	large			1.24919
							small								small								small					8.34497	4.51439	1.84853	medium		1.84853			3.01657	1.42288	2.12005	small	2.12005
							small								small								small					2.89015	3.2591	0.886794	small	0.886794				2.04411	1.25982	1.62254	small	1.62254
							small								small								small					6.14373	3.54149	1.73479	medium		1.73479			8.01147	5.981	1.33949	medium		1.33949
							small								small								small					7.57768	5.06019	1.49751	medium		1.49751			4.17764	3.07805	1.35724	medium		1.35724
							small								small								small					2.14041	1.63849	1.30633	small	1.30633				6.31688	4.13166	1.52889	medium		1.52889
							small								small								small					9.10726	5.00762	1.81868	medium		1.81868			5.76569	3.85521	1.49556	medium		1.49556
							small								small								small					3.04819	1.96912	1.548	small	1.548				1.37035	1.0225	1.34019	small	1.34019
							small								small								small					6.9543	4.03255	1.72454	medium		1.72454			3.85177	3.17187	1.21435	small	1.21435
							small								small								small					6.56767	4.54529	1.44494	medium		1.44494			2.03596	1.45599	1.39833	small	1.39833
							small								small								small					2.23636	1.14581	1.95178	small	1.95178				3.9632	2.49656	1.58747	small	1.58747
							small								small								small					7.88967	5.76318	1.36898	medium		1.36898			3.11088	2.87987	1.08021	small	1.08021
							small								small								small					3.83932	2.88891	1.32899	small	1.32899				8.51183	5.36339	1.58703	medium		1.58703
							small								small								small					6.03806	1.01139	5.97007	medium		5.97007			4.81118	2.17245	2.21464	medium		2.21464
							small								small								small					9.39354	4.83797	1.94163	medium		1.94163			4.54646	2.35859	1.92762	medium		1.92762
							small								small								small					2.36399	1.9973	1.18359	small	1.18359				2.63226	1.95269	1.34801	small	1.34801
							small								small								small					7.30581	3.53335	2.06767	medium		2.06767			2.54366	1.03756	2.45158	small	2.45158
							small								small								small					15.5752	7.88244	1.97594	medium		1.97594			3.62809	2.05153	1.76848	small	1.76848
							small								small								small					8.7015	4.80491	1.81096	medium		1.81096			5.60561	3.95556	1.41715	medium		1.41715
							small								small								small					4.40437	1.19405	3.68861	medium		3.68861			6.34161	1.96273	3.23102	medium		3.23102
							small								small								small					9.57102	6.3827	1.49953	medium		1.49953			3.70636	4.17431	0.887898	small	0.887898
							small								small								small					7.65983	6.51495	1.17573	medium		1.17573			3.47507	1.26985	2.73659	small	2.73659
							small								small								small					11.7262	4.98431	2.35262	medium		2.35262			21.9058	15.6441	1.40026	large			1.40026
							small								small								small					4.11808	2.71926	1.51441	medium		1.51441			18.0845	3.1508	5.73964	large			5.73964
							small								small								small					4.18425	1.34039	3.12167	medium		3.12167			8.22755	7.67631	1.07181	medium		1.07181
							small								small								small					3.75529	2.50625	1.49837	small	1.49837				2.12347	2.40474	0.883036	small	0.883036
							small								small								small					4.10586	1.76532	2.32584	medium		2.32584			5.442	2.88138	1.88868	medium		1.88868
							small								small								small					6.65924	3.90951	1.70334	medium		1.70334			11.8562	1.17302	10.1074	medium		10.1074
							small								small								small					4.76811	3.21086	1.48499	medium		1.48499			11.7176	14.875	0.787736	medium		0.787736
							small								small								small					14.2673	8.26455	1.72633	medium		1.72633			18.2954	18.9831	0.963773	large			0.963773
							small								small								small					2.86789	2.17562	1.31819	small	1.31819				8.26233	6.03167	1.36982	medium		1.36982
							small								small								small					5.55799	2.01248	2.76176	medium		2.76176			4.2195	2.07662	2.03191	medium		2.03191
							small								small								small					28.2553	19.0408	1.48394	large			1.48394		34.4653	24.7694	1.39145	large			1.39145
							small								small								small					7.40239	2.09649	3.53085	medium		3.53085			3.13262	1.54229	2.03115	small	2.03115
							small								small								small					6.52158	1.39513	4.67453	medium		4.67453			4.50161	3.18843	1.41186	medium		1.41186
							small								small								small					3.30344	2.05801	1.60516	small	1.60516				45.7046	30.919	1.4782	large			1.4782
							small								small								small					5.41155	1.88185	2.87565	medium		2.87565			2.23001	1.18155	1.88736	small	1.88736
							small								small								small					1.98081	1.06017	1.86839	small	1.86839				4.93457	2.479	1.99055	medium		1.99055
							small								small								small					5.63293	2.9198	1.92922	medium		1.92922			40.1074	26.0127	1.54184	large			1.54184
							small								small								small					8.18161	6.46779	1.26498	medium		1.26498			10.1901	2.1002	4.85196	medium		4.85196
							small								small								small					3.3696	2.23958	1.50457	small	1.50457				3.93548	2.6551	1.48223	small	1.48223
							small								small								small					7.94424	3.58105	2.21841	medium		2.21841			37.3566	27.9016	1.33887	large			1.33887
							small								small								small					2.28026	1.13985	2.0005	small	2.0005				56.0023	38.7724	1.44439	large			1.44439
							small								small								small					11.5957	5.05803	2.29254	medium		2.29254			18.4715	12.4953	1.47827	large			1.47827
							small								small								small					28.7962	17.3009	1.66443	large			1.66443		3.4093	2.48703	1.37083	small	1.37083
							small								small								small					65.8871	49.9792	1.31829	large			1.31829		29.9847	18.0609	1.6602	large			1.6602
							small								small								small					84.8458	72.8639	1.16444	large			1.16444		2.0172	1.23072	1.63905	small	1.63905
							small								small								small					6.33281	4.52632	1.39911	medium		1.39911			58.758	38.1432	1.54045	large			1.54045
							small								small								small					3.96224	7.30357	0.542507	small	0.542507				2.59992	1.68628	1.54181	small	1.54181
							small								small								small					6.3256	4.0862	1.54804	medium		1.54804			9.84658	5.40954	1.82022	medium		1.82022
							small								small								small					5.38897	3.11167	1.73186	medium		1.73186			8.40665	5.93233	1.41709	medium		1.41709
							small								small								small					6.83515	3.91764	1.74471	medium		1.74471			7.19067	4.53605	1.58523	medium		1.58523
							small								small								small					8.46256	5.51494	1.53448	medium		1.53448			1.31382	1.06766	1.23056	small	1.23056
							small								small								small					8.79118	1.24174	7.07972	medium		7.07972			4.67393	3.2963	1.41793	medium		1.41793
							small								small								small					45.768	28.6354	1.5983	large			1.5983		3.89417	2.10823	1.84713	small	1.84713
							small								small								small					11.1084	6.68026	1.66288	medium		1.66288			4.64131	1.52673	3.04003	medium		3.04003
							small								small								small					7.07722	3.00598	2.35438	medium		2.35438			5.63116	3.6164	1.55712	medium		1.55712
							small								small								small					3.21564	2.10191	1.52986	small	1.52986				21.7693	18.2129	1.19527	large			1.19527
							small								small								small					62.9061	47.2653	1.33091	large			1.33091		6.4949	3.97964	1.63203	medium		1.63203
							small								small								small					3.30626	1.32738	2.49082	small	2.49082				18.3416	14.2353	1.28846	large			1.28846
							small								small								small					7.87807	2.71438	2.90235	medium		2.90235			4.02136	2.87887	1.39686	medium		1.39686
							small								small								small					5.82138	4.31493	1.34913	medium		1.34913			6.37205	3.74484	1.70156	medium		1.70156
							small								small								small					26.8633	13.025	2.06244	large			2.06244		3.71017	2.81866	1.31629	small	1.31629
							small								small								small					2.5631	2.10679	1.21659	small	1.21659				34.8469	16.1765	2.15418	large			2.15418
							small								small								small					6.4758	5.46995	1.18389	medium		1.18389			3.89199	3.03189	1.28368	small	1.28368
							small								small								small					10.2471	6.31115	1.62365	medium		1.62365			11.0751	6.9413	1.59553	medium		1.59553
							small								small								small					79.3705	56.4367	1.40637	large			1.40637		1.95361	1.24928	1.56378	small	1.56378
							small								small								small					4.46865	2.66994	1.67369	medium		1.67369			12.0018	8.72491	1.37558	medium		1.37558
							small								small								small					45.0772	24.7937	1.81809	large			1.81809		11.2784	10.1558	1.11053	medium		1.11053
							small								small								small					6.48803	4.18431	1.55056	medium		1.55056			6.3783	4.60027	1.38651	medium		1.38651
							small								small								small					39.9034	22.7936	1.75064	large			1.75064		1.07845	1.3406	0.804458	small	0.804458
							small								small								small					6.97939	4.26182	1.63766	medium		1.63766			3.7455	1.87091	2.00196	small	2.00196
							small								small								small					12.3223	6.99137	1.7625	medium		1.7625			16.7698	10.501	1.59697	large			1.59697
							small								small								small					7.68836	5.04502	1.52395	medium		1.52395			4.915	1.24928	3.93426	medium		3.93426
							small								small								small					5.27295	4.13932	1.27387	medium		1.27387			5.82413	4.95498	1.17541	medium		1.17541
							small								small								small					1.9043	1.76424	1.07939	small	1.07939				4.31326	1.44646	2.98195	medium		2.98195
							small								small								small					7.68272	4.74529	1.61902	medium		1.61902			16.5942	11.4508	1.44918	large			1.44918
							small								small								small					9.81749	5.83418	1.68275	medium		1.68275			5.69584	3.61238	1.57676	medium		1.57676
							small								small								small					4.40625	2.53064	1.74116	medium		1.74116			14.5425	12.1983	1.19217	medium		1.19217
							small								small								small					5.80821	2.95557	1.96517	medium		1.96517			8.97659	5.87965	1.52672	medium		1.52672
							small								small								small					11.6873	5.89706	1.98189	medium		1.98189			1.57147	1.07318	1.46432	small	1.46432
							small								small								small					4.1093	2.00218	2.05241	medium		2.05241			1.79352	1.14292	1.56925	small	1.56925
							small								small								small					24.3087	15.0369	1.6166	large			1.6166		10.921	5.8922	1.85346	medium		1.85346
							small								small								small					13.6333	7.77241	1.75406	medium		1.75406			3.2079	1.73595	1.84792	small	1.84792
							small								small								small					5.34915	1.92467	2.77925	medium		2.77925			3.74713	2.73237	1.37139	small	1.37139
							small								small								small					3.57561	1.96641	1.81835	small	1.81835				11.6909	3.46789	3.3712	medium		3.3712
							small								small								small					5.00046	3.69325	1.35395	medium		1.35395			3.13669	2.30691	1.3597	small	1.3597
							small								small								small					22.5232	13.8223	1.62949	large			1.62949		9.33834	5.92732	1.57547	medium		1.57547
							small								small								small					18.397	12.1475	1.51447	large			1.51447		1.51956	1.78913	0.849329	small	0.849329
							small								small								small					3.84528	2.12576	1.8089	small	1.8089				7.87395	4.61582	1.70586	medium		1.70586
							small								small								small					1.92907	1.20326	1.6032	small	1.6032				3.24297	2.3641	1.37175	small	1.37175
							small								small								small					5.09641	2.38375	2.13798	medium		2.13798			51.9943	38.6936	1.34374	large			1.34374
							small								small								small					28.5089	19.8982	1.43274	large			1.43274		3.63869	1.54881	2.34935	small	2.34935
							small								small								small					2.81113	2.38972	1.17635	small	1.17635				6.05433	2.21509	2.73322	medium		2.73322
							small								small								small					2.20846	1.67318	1.31992	small	1.31992				5.01882	2.99627	1.67502	medium		1.67502
							small								small								small					3.19149	1.81194	1.76137	small	1.76137				2.87225	1.68277	1.70686	small	1.70686
							small								small								small					21.7544	13.1247	1.65751	large			1.65751		8.72193	6.13002	1.42282	medium		1.42282
							small								small								small					2.17334	1.0477	2.07438	small	2.07438				11.6344	6.98143	1.66648	medium		1.66648
							small								small								small					4.66651	2.38213	1.95897	medium		1.95897			5.38601	2.14937	2.50586	medium		2.50586
							small								small								small					5.76275	2.2927	2.51352	medium		2.51352			14.6404	9.65961	1.51563	medium		1.51563
							small								small								small					11.9222	6.06562	1.96553	medium		1.96553			5.16233	4.13166	1.24945	medium		1.24945
							small								small								small					5.36044	2.84988	1.88093	medium		1.88093			2.39553	1.65417	1.44818	small	1.44818
							small								small								small					8.84292	5.46887	1.61696	medium		1.61696			1.17738	1.32805	0.886548	small	0.886548
							small								small								small					6.21052	3.99027	1.55642	medium		1.55642			1.56712	1.2849	1.21964	small	1.21964
							small								small								small					2.57282	1.80164	1.42805	small	1.42805				22.3235	16.7263	1.33463	large			1.33463
							small								small								small					9.72404	5.26291	1.84766	medium		1.84766			4.46166	1.63862	2.72282	medium		2.72282
							small								small								small					3.49503	1.77237	1.97195	small	1.97195				6.74521	3.19545	2.11088	medium		2.11088
							small								small								small					5.23282	1.71275	3.05522	medium		3.05522			2.31508	1.50817	1.53503	small	1.53503
							small								small								small					5.80163	2.51221	2.30937	medium		2.30937			1.29561	1.25731	1.03046	small	1.03046
							small								small								small					8.334	3.89488	2.13973	medium		2.13973			2.47272	1.23724	1.99858	small	1.99858
							small								small								small					9.04925	5.219	1.7339	medium		1.7339			5.1183	2.57081	1.99093	medium		1.99093
							small								small								small					2.23887	1.37941	1.62306	small	1.62306				8.86407	4.73323	1.87273	medium		1.87273
							small								small								small					54.1211	36.0051	1.50315	large			1.50315		26.8852	20.0457	1.34119	large			1.34119
							small								small								small					3.45301	1.38863	2.48664	small	2.48664				32.2576	22.6732	1.42272	large			1.42272
							small								small								small					3.23633	1.43578	2.25406	small	2.25406				4.35186	12.8696	0.33815	medium		0.33815
							small								small								small					8.01008	1.96045	4.08585	medium		4.08585			1.59104	1.30548	1.21874	small	1.21874
							small								small								small					6.02395	3.76208	1.60123	medium		1.60123			26.9828	19.2781	1.39966	large			1.39966
							small								small								small					27.2023	16.6516	1.63362	large			1.63362		2.944	2.50358	1.17591	small	1.17591
							small								small								small					3.97196	1.84446	2.15346	small	2.15346				4.47715	2.99727	1.49374	medium		1.49374
							small								small								small					8.64631	4.07049	2.12415	medium		2.12415			38.5122	21.891	1.75927	large			1.75927
							small								small								small					9.31202	4.66615	1.99565	medium		1.99565			2.15636	1.61052	1.33892	small	1.33892
							small								small								small					17.0455	8.83203	1.92997	large			1.92997		10.1072	8.65567	1.1677	medium		1.1677
							small								small								small					7.32839	5.23797	1.39909	medium		1.39909			10.9606	2.03598	5.38347	medium		5.38347
							small								small								small					9.60458	4.71114	2.03869	medium		2.03869			18.6674	21.9452	0.850638	large			0.850638
							small								small								small					10.0439	5.47158	1.83565	medium		1.83565			1.82532	1.53827	1.1866	small	1.1866
							small								small								small					3.25859	1.73118	1.8823	small	1.8823				2.08434	1.48258	1.40588	small	1.40588
							small								small								small					8.04426	5.59841	1.43688	medium		1.43688			9.54272	4.56966	2.08828	medium		2.08828
							small								small								small					7.66171	4.29108	1.7855	medium		1.7855			7.08359	4.89829	1.44613	medium		1.44613
							small								small								small					6.26696	3.74908	1.6716	medium		1.6716			32.2736	23.1127	1.39636	large			1.39636
							small								small								small					6.56391	3.60598	1.82028	medium		1.82028			33.5801	13.127	2.5581	large			2.5581
							small								small								small					23.1313	13.1882	1.75394	large			1.75394		1.64866	3.09712	0.53232	small	0.53232
							small								small								small					9.70805	5.50302	1.76413	medium		1.76413			5.48983	4.3188	1.27115	medium		1.27115
							small								small								small					5.20993	2.82224	1.84603	medium		1.84603			4.86825	2.23817	2.1751	medium		2.1751
							small								small								small					5.7248	2.99243	1.91309	medium		1.91309			7.97913	5.75774	1.38581	medium		1.38581
							small								small								small					2.64808	1.7702	1.49592	small	1.49592				4.68697	2.95664	1.58524	medium		1.58524
							small								small								small					10.1596	6.2369	1.62895	medium		1.62895			26.1326	18.4668	1.41511	large			1.41511
							small								small								small					6.37138	5.95939	1.06913	medium		1.06913			43.9782	39.5611	1.11165	large			1.11165
							small								small								small					12.8503	7.78216	1.65125	medium		1.65125			9.52859	3.28677	2.89908	medium		2.89908
							small								small								small					5.05847	2.37129	2.13322	medium		2.13322			2.43902	2.36761	1.03016	small	1.03016
							small								small								small					4.53889	2.13118	2.12976	medium		2.12976			4.46709	3.22054	1.38706	medium		1.38706
							small								small								small					1.23232	1.06451	1.15765	small	1.15765				9.11384	5.53096	1.64779	medium		1.64779
							small								small								small					11.4615	5.99679	1.91128	medium		1.91128			8.11801	5.99204	1.3548	medium		1.3548
							small								small								small					3.37869	3.12468	1.08129	small	1.08129				10.054	5.77831	1.73995	medium		1.73995
							small								small								small					8.10447	3.64393	2.2241	medium		2.2241			9.59382	5.85858	1.63757	medium		1.63757
							small								small								small					1.45339	1.08022	1.34545	small	1.34545				5.19603	9.71631	0.534774	medium		0.534774
							small								small								small					66.6212	42.0003	1.58621	large			1.58621		49.137	44.8136	1.09647	large			1.09647
							small								small								small					1.07898	1.76912	0.6099	small	0.6099				12.6889	6.60815	1.92019	medium		1.92019
							small								small								small					6.79156	4.68838	1.4486	medium		1.4486			50.875	43.5478	1.16826	large			1.16826
							small								small								small					6.67962	3.70409	1.80331	medium		1.80331			40.4996	38.8793	1.04167	large			1.04167
							small								small								small					10.1389	4.6667	2.17261	medium		2.17261			4.04148	3.35199	1.20569	medium		1.20569
							small								small								small					11.3944	5.97727	1.90629	medium		1.90629			6.40874	3.64851	1.75654	medium		1.75654
							small								small								small					6.21115	3.51438	1.76735	medium		1.76735			3.17828	1.21717	2.6112	small	2.6112
							small								small								small					6.78309	3.95666	1.71435	medium		1.71435			47.9759	38.3324	1.25158	large			1.25158
							small								small								small					8.6275	3.8591	2.23562	medium		2.23562			2.4893	1.11633	2.2299	small	2.2299
							small								small								small					1.28939	1.07535	1.19905	small	1.19905				37.5806	30.5547	1.22994	large			1.22994
							small								small								small					3.94907	3.15449	1.25189	small	1.25189				13.3662	7.38231	1.81058	medium		1.81058
							small								small								small					6.37232	5.61358	1.13516	medium		1.13516			2.15609	2.67116	0.807173	small	0.807173
							small								small								small					17.52	9.35345	1.8731	large			1.8731		3.64277	1.53426	2.37428	small	2.37428
							small								small								small					4.17233	2.79731	1.49155	medium		1.49155			5.90512	2.32497	2.53987	medium		2.53987
							small								small								small					6.19704	4.68187	1.32362	medium		1.32362			42.7671	34.5825	1.23667	large			1.23667
							small								small								small					8.05618	5.0938	1.58157	medium		1.58157			1.45297	1.45047	1.00173	small	1.00173
							small								small								small					9.21701	5.29109	1.74199	medium		1.74199			55.1364	41.2469	1.33674	large			1.33674
							small								small								small					27.9028	14.7817	1.88766	large			1.88766		4.5383	2.90395	1.5628	medium		1.5628
							small								small								small					5.03872	2.45801	2.04992	medium		2.04992			39.0316	28.5724	1.36606	large			1.36606
							small								small								small					4.90137	1.28348	3.81882	medium		3.81882			2.50153	1.89148	1.32252	small	1.32252
							small								small								small					5.01614	2.4618	2.03759	medium		2.03759			30.1711	27.843	1.08362	large			1.08362
							small								small								small					1.41827	1.5702	0.903239	small	0.903239				5.59855	2.18148	2.5664	medium		2.5664
							small								small								small					6.58774	3.38051	1.94874	medium		1.94874			2.52219	1.91557	1.31668	small	1.31668
							small								small								small					4.53858	2.12684	2.13395	medium		2.13395			7.68614	3.88281	1.97953	medium		1.97953
							small								small								small					32.321	18.2592	1.77012	large			1.77012		3.75474	1.60851	2.33429	small	2.33429
							small								small								small					33.7581	32.7205	1.03171	large			1.03171		10.4018	5.52343	1.88322	medium		1.88322
							small								small								small					14.2322	7.58324	1.8768	medium		1.8768			15.7381	7.68134	2.04888	medium		2.04888
							small								small								small					2.26145	2.25909	1.00104	small	1.00104				11.0601	7.2644	1.52251	medium		1.52251
							small								small								small					1.94945	1.16965	1.66669	small	1.66669				5.71188	4.17381	1.36851	medium		1.36851
							small								small								small					11.9394	6.89923	1.73054	medium		1.73054			6.20762	4.4046	1.40935	medium		1.40935
							small								small								small					6.01611	2.94257	2.04451	medium		2.04451			6.73435	5.80641	1.15981	medium		1.15981
							small								small								small					2.93687	1.70841	1.71907	small	1.71907				4.39072	3.04945	1.43984	medium		1.43984
							small								small								small					4.90451	2.8385	1.72785	medium		1.72785			1.94437	1.44546	1.34516	small	1.34516
							small								small								small					10.8949	5.80871	1.87562	medium		1.87562			1.65111	1.21015	1.36438	small	1.36438
							small								small								small					3.27208	1.12521	2.90797	small	2.90797				1.5462	1.0205	1.51514	small	1.51514
							small								small								small					6.82261	3.61249	1.88862	medium		1.88862			5.72656	3.5893	1.59545	medium		1.59545
							small								small								small					4.15759	1.07914	3.85269	medium		3.85269			20.7219	13.9448	1.48599	large			1.48599
							small								small								small					6.42249	3.60328	1.7824	medium		1.7824			5.85321	4.42266	1.32346	medium		1.32346
							small								small								small					6.62317	3.33119	1.98823	medium		1.98823			3.02391	1.27939	2.36356	small	2.36356
							small								small								small					5.37361	2.3675	2.26974	medium		2.26974			6.9833	3.79601	1.83964	medium		1.83964
							small								small								small					12.9968	8.80439	1.47617	medium		1.47617			1.58262	1.85436	0.853459	small	0.853459
							small								small								small					9.98023	4.75342	2.09959	medium		2.09959			3.93793	3.37507	1.16677	small	1.16677
							small								small								small					3.32821	1.15881	2.87208	small	2.87208				19.763	15.4665	1.27779	large			1.27779
							small								small								small					3.432	1.38321	2.48119	small	2.48119				2.78011	1.94717	1.42777	small	1.42777
							small								small								small					6.94364	4.34799	1.59698	medium		1.59698			4.37795	2.89041	1.51465	medium		1.51465
							small								small								small					2.78605	2.19026	1.27202	small	1.27202				7.84378	6.55046	1.19744	medium		1.19744
							small								small								small					3.89921	1.55069	2.51451	small	2.51451				4.87206	2.57282	1.89367	medium		1.89367
							small								small								small					3.68128	2.574	1.43018	small	1.43018				5.17429	2.44488	2.11638	medium		2.11638
							small								small								small					4.30654	3.09379	1.392	medium		1.392			3.7224	1.93513	1.92359	small	1.92359
							small								small								small					3.96538	1.38863	2.85561	small	2.85561				4.62935	3.60536	1.28402	medium		1.28402
							small								small								small					5.69	1.55286	3.66422	medium		3.66422			2.42298	1.56135	1.55185	small	1.55185
							small								small								small					3.70919	1.4515	2.55542	small	2.55542				1.86935	1.64414	1.13698	small	1.13698
							small								small								small					6.92922	4.99732	1.38659	medium		1.38659			25.0533	18.9765	1.32023	large			1.32023
							small								small								small					3.52701	1.09648	3.21665	small	3.21665				11.5107	4.83056	2.3829	medium		2.3829
							small								small								small					7.82602	5.35993	1.4601	medium		1.4601			4.62989	1.24778	3.71051	medium		3.71051
							small								small								small					2.26929	1.20272	1.8868	small	1.8868				4.06675	2.44488	1.66338	medium		1.66338
							small								small								small					4.49625	2.31058	1.94594	medium		1.94594			3.34461	2.96767	1.12702	small	1.12702
							small								small								small					1.54746	1.10299	1.40297	small	1.40297				5.66242	3.3846	1.67299	medium		1.67299
							small								small								small					7.62408	4.62279	1.64924	medium		1.64924			3.33211	1.50566	2.21306	small	2.21306
							small								small								small					12.422	8.15018	1.52414	medium		1.52414			4.29859	3.42022	1.25681	medium		1.25681
							small								small								small					7.03332	2.45476	2.86518	medium		2.86518			3.75175	2.69022	1.39459	small	1.39459
							small								small								small					1.74971	1.00434	1.74214	small	1.74214				3.84633	1.96373	1.95868	small	1.95868
							small								small								small					2.00087	1.83849	1.08832	small	1.08832				6.29052	1.93614	3.249	medium		3.249
							small								small								small					2.84845	1.37508	2.07148	small	2.07148				50.9867	41.7938	1.21996	large			1.21996
							small								small								small					2.258	1.58104	1.42817	small	1.42817				4.31897	1.96474	2.19825	medium		2.19825
							small								small								small					14.9377	6.81197	2.19287	medium		2.19287			3.93331	2.07762	1.89318	small	1.89318
							small								small								small					14.8794	7.91387	1.88017	medium		1.88017			2.8361	1.05813	2.6803	small	2.6803
							small								small								small					9.82313	5.32036	1.84633	medium		1.84633			4.71225	2.71982	1.73256	medium		1.73256
							small								small								small					7.50806	4.37238	1.71716	medium		1.71716			2.68471	1.2538	2.14127	small	2.14127
							small								small								small					5.21181	2.62495	1.98549	medium		1.98549			31.0001	25.1086	1.23464	large			1.23464
							small								small								small					38.0248	24.3102	1.56415	large			1.56415		6.75799	1.82325	3.70657	medium		3.70657
							small								small								small					6.97751	3.55883	1.96062	medium		1.96062			20.4099	17.3861	1.17392	large			1.17392
							small								small								small					11.5882	7.41414	1.56299	medium		1.56299			38.9169	30.7529	1.26547	large			1.26547
							small								small								small					3.82364	2.34148	1.633	small	1.633				3.24867	1.91406	1.69727	small	1.69727
							small								small								small					39.7287	29.3872	1.35191	large			1.35191		2.68444	1.71739	1.5631	small	1.5631
							small								small								small					7.48141	4.70301	1.59077	medium		1.59077			5.31589	4.23	1.25671	medium		1.25671
							small								small								small					8.72	4.26778	2.04322	medium		2.04322			16.8791	13.8159	1.22172	large			1.22172
							small								small								small					20.4145	12.864	1.58694	large			1.58694		4.2021	7.17861	0.585365	medium		0.585365
							small								small								small					8.01228	4.74637	1.68809	medium		1.68809			1.49728	1.10629	1.35342	small	1.35342
							small								small								small					12.3292	7.7285	1.59529	medium		1.59529			10.3252	6.07633	1.69925	medium		1.69925
							small								small								small					52.2175	37.7926	1.38168	large			1.38168		2.3159	2.02293	1.14482	small	1.14482
							small								small								small					5.66617	3.99894	1.41692	medium		1.41692			8.43926	6.41098	1.31638	medium		1.31638
							small								small								small					2.18682	2.17291	1.0064	small	1.0064				4.03088	3.16184	1.27485	medium		1.27485
							small								small								small					50.6104	32.9747	1.53482	large			1.53482		6.09429	3.13174	1.94598	medium		1.94598
							small								small								small					10.6886	6.89381	1.55046	medium		1.55046			1.5356	1.16148	1.3221	small	1.3221
							small								small								small					2.9121	1.35611	2.1474	small	2.1474				4.83781	2.98423	1.62113	medium		1.62113
							small								small								small					8.70746	5.29001	1.64602	medium		1.64602			1.656	2.67417	0.619258	small	0.619258
							small								small								small					9.75446	5.59082	1.74473	medium		1.74473			4.86173	2.73638	1.7767	medium		1.7767
							small								small								small					3.66059	2.11871	1.72774	small	1.72774				6.20735	3.55669	1.74526	medium		1.74526
							small								small								small					40.0915	23.4825	1.70729	large			1.70729		1.83565	1.46251	1.25514	small	1.25514
							small								small								small					25.2836	15.9383	1.58634	large			1.58634		11.4012	8.09275	1.40882	medium		1.40882
							small								small								small					1.9645	1.76586	1.11249	small	1.11249				3.29053	1.78662	1.84176	small	1.84176
							small								small								small					25.4974	14.9741	1.70277	large			1.70277		2.64395	3.05296	0.866026	small	0.866026
							small								small								small					2.43548	1.87806	1.29681	small	1.29681				2.38167	1.70033	1.40071	small	1.40071
							small								small								small					2.76943	1.66397	1.66435	small	1.66435				45.2912	36.1584	1.25258	large			1.25258
							small								small								small					4.38712	2.60652	1.68313	medium		1.68313			13.5793	7.51677	1.80653	medium		1.80653
							small								small								small					7.75547	4.22713	1.83469	medium		1.83469			53.226	48.1716	1.10492	large			1.10492
							small								small								small					10.0216	6.03798	1.65976	medium		1.65976			29.0117	21.4024	1.35554	large			1.35554
							small								small								small					34.1052	22.7888	1.49658	large			1.49658		3.82839	2.55075	1.50089	small	1.50089
							small								small								small					3.56401	1.72684	2.06389	small	2.06389				10.1529	3.95556	2.56674	medium		2.56674
							small								small								small					1.14107	1.16044	0.983308	small	0.983308				27.4255	20.1812	1.35896	large			1.35896
							small								small								small					4.07293	1.8683	2.18001	medium		2.18001			6.1288	3.20248	1.91377	medium		1.91377
							small								small								small					11.4129	6.42172	1.77724	medium		1.77724			47.5117	37.6792	1.26095	large			1.26095
							small								small								small					5.21243	3.47102	1.5017	medium		1.5017			20.7151	15.1394	1.36829	large			1.36829
							small								small								small					35.9436	20.7551	1.73179	large			1.73179		3.53568	2.05153	1.72343	small	1.72343
							small								small								small					7.784	4.35504	1.78736	medium		1.78736			26.5865	18.1041	1.46854	large			1.46854
							small								small								small					8.51587	5.51494	1.54415	medium		1.54415			4.59348	3.09059	1.48628	medium		1.48628
							small								small								small					30.5691	15.7795	1.93727	large			1.93727		8.13188	5.8049	1.40086	medium		1.40086
							small								small								small					2.91837	1.72413	1.69266	small	1.69266				40.4294	31.4894	1.2839	large			1.2839
							small								small								small					1.07585	1.0309	1.0436	small	1.0436				8.51373	8.59095	0.991012	medium		0.991012
							small								small								small					2.96196	1.1767	2.51717	small	2.51717				1.19831	1.06164	1.12874	small	1.12874
							small								small								small					6.99789	3.82983	1.8272	medium		1.8272			5.48195	2.87184	1.90886	medium		1.90886
							small								small								small					16.9791	9.98814	1.69992	large			1.69992		2.81979	1.53677	1.83488	small	1.83488
							small								small								small					10.5954	6.74801	1.57016	medium		1.57016			16.9497	10.8387	1.56382	large			1.56382
							small								small								small					3.38026	2.18863	1.54446	small	1.54446				3.75882	1.88496	1.99411	small	1.99411
							small								small								small					3.01213	1.20001	2.51009	small	2.51009				3.45985	1.92911	1.79349	small	1.79349
							small								small								small					6.48991	2.91438	2.22686	medium		2.22686			4.98104	3.73129	1.33494	medium		1.33494
							small								small								small					7.54162	5.6293	1.33971	medium		1.33971			38.244	28.1289	1.3596	large			1.3596
							small								small								small					12.7647	8.49111	1.5033	medium		1.5033			6.11222	3.21803	1.89937	medium		1.89937
							small								small								small					54.4796	35.1856	1.54835	large			1.54835		2.77386	1.29444	2.14291	small	2.14291
							small								small								small					5.93144	2.92576	2.02732	medium		2.02732			2.1887	1.55383	1.40859	small	1.40859
							small								small								small					4.41441	4.60924	0.957729	medium		0.957729			2.37922	1.03505	2.29866	small	2.29866
							small								small								small					4.4558	2.60327	1.71162	medium		1.71162			3.1848	2.57382	1.23738	small	1.23738
							small								small								small					7.84892	6.40058	1.22628	medium		1.22628			4.67637	5.20083	0.899159	medium		0.899159
							small								small								small					20.0965	11.928	1.68482	large			1.68482		45.3129	33.1416	1.36725	large			1.36725
							small								small								small					6.34347	3.82062	1.66033	medium		1.66033			1.40759	1.2844	1.09591	small	1.09591
							small								small								small					2.5562	1.17182	2.18139	small	2.18139				1.20076	1.65166	0.727	small	0.727
							small								small								small					1.32702	1.08673	1.22111	small	1.22111				15.2272	8.68828	1.75261	medium		1.75261
							small								small								small					11.5964	6.62823	1.74954	medium		1.74954			45.1955	30.8237	1.46626	large			1.46626
							small								small								small					24.5699	14.4933	1.69526	large			1.69526		5.51049	3.47341	1.58648	medium		1.58648
							small								small								small					5.33128	1.99731	2.66924	medium		2.66924			24.6299	17.8005	1.38366	large			1.38366
							small								small								small					4.25574	2.91709	1.4589	medium		1.4589			7.08848	3.73129	1.89974	medium		1.89974
							small								small								small					3.29622	1.35502	2.4326	small	2.4326				11.0987	6.42452	1.72755	medium		1.72755
							small								small								small					7.06154	4.71548	1.49752	medium		1.49752			7.08169	3.07103	2.30597	medium		2.30597
							small								small								small					13.1134	7.4575	1.75842	medium		1.75842			4.46628	2.21961	2.01219	medium		2.01219
							small								small								small					6.51813	3.71005	1.75689	medium		1.75689			13.7818	7.01755	1.9639	medium		1.9639
							small								small								small					4.76748	2.32359	2.05177	medium		2.05177			4.10045	2.03899	2.01102	medium		2.01102
							small								small								small					7.53879	4.68783	1.60816	medium		1.60816			2.45071	1.44094	1.70077	small	1.70077
							small								small								small					7.84922	4.84285	1.62079	medium		1.62079			3.58243	2.87435	1.24634	small	1.24634
							small								small								small					3.86315	2.35449	1.64076	small	1.64076				2.21262	1.9843	1.11506	small	1.11506
							small								small								small					9.04893	4.04284	2.23826	medium		2.23826			5.02562	2.29637	2.1885	medium		2.1885
							small								small								small					13.5624	8.41956	1.61082	medium		1.61082			2.08814	3.45033	0.605201	small	0.605201
							small								small								small					13.3276	7.5453	1.76634	medium		1.76634			8.04273	3.94954	2.03637	medium		2.03637
							small								small								small					2.58568	1.95394	1.32331	small	1.32331				3.60145	2.65209	1.35797	small	1.35797
							small								small								small					9.13485	4.19352	2.17832	medium		2.17832			4.49047	2.92302	1.53624	medium		1.53624
							small								small								small					7.8533	4.83797	1.62326	medium		1.62326			7.21541	4.02731	1.79162	medium		1.79162
							small								small								small					11.5801	5.15017	2.24848	medium		2.24848			1.288	1.04809	1.2289	small	1.2289
							small								small								small					12.7051	5.34421	2.37737	medium		2.37737			5.83391	3.49247	1.67043	medium		1.67043
							small								small								small					9.01726	4.88675	1.84525	medium		1.84525			3.96728	3.0911	1.28345	small	1.28345
							small								small								small					19.1515	10.2499	1.86845	large			1.86845		14.8363	5.47978	2.70747	medium		2.70747
							small								small								small					9.55597	4.16588	2.29387	medium		2.29387			3.50252	2.82569	1.23953	small	1.23953
							small								small								small					8.46758	4.8797	1.73526	medium		1.73526						small
							small								small								small					10.227	5.69218	1.79668	medium		1.79668						small
							small								small								small					5.19864	2.12196	2.44992	medium		2.44992						small
							small								small								small					7.35724	4.1713	1.76378	medium		1.76378						small
							small								small								small					7.68837	5.0873	1.51129	medium		1.51129						small
							small								small								small					6.86211	3.72306	1.84314	medium		1.84314						small
							small								small								small					8.67109	5.15667	1.68153	medium		1.68153						small
							small								small								small					6.89284	5.0396	1.36774	medium		1.36774						small
							small								small								small					12.0902	7.75669	1.55868	medium		1.55868						small
							small								small								small					5.39775	3.06777	1.7595	medium		1.7595						small
							small								small								small					8.36473	3.98539	2.09885	medium		2.09885						small
							small								small								small					7.6313	5.12415	1.48928	medium		1.48928						small
							small								small								small					6.42751	2.64609	2.42906	medium		2.42906						small
							small								small								small					9.67858	4.60003	2.10403	medium		2.10403						small
							small								small								small					6.75048	3.76154	1.79461	medium		1.79461						small
							small								small								small					10.7253	5.66616	1.89286	medium		1.89286						small
							small								small								small					1.90743	7.48731	0.254755	small	0.254755							small
							small								small								small					4.40469	2.41736	1.82211	medium		1.82211						small
							small								small								small					1.54652	2.12847	0.726587	small	0.726587							small
							small								small								small					24.7471	15.9925	1.54742	large			1.54742					small
							small								small								small					12.7863	6.48676	1.97115	medium		1.97115						small
							small								small								small					7.5714	4.26886	1.77364	medium		1.77364						small
							small								small								small					2.19435	1.15014	1.90789	small	1.90789							small
							small								small								small					7.5297	3.88674	1.93728	medium		1.93728						small
							small								small								small					9.47915	4.15125	2.28345	medium		2.28345						small
							small								small								small					4.45172	1.33551	3.33335	medium		3.33335						small
							small								small								small					1.93785	1.14201	1.69687	small	1.69687							small
							small								small								small					16.2695	9.31225	1.7471	large			1.7471					small
							small								small								small					10.4562	6.01033	1.73971	medium		1.73971						small
							small								small								small					8.11513	3.69162	2.19826	medium		2.19826						small
							small								small								small					11.8068	7.28893	1.61982	medium		1.61982						small
							small								small								small					6.62882	2.8862	2.29673	medium		2.29673						small
							small								small								small					3.51697	2.38159	1.47674	small	1.47674							small
							small								small								small					5.07102	3.62279	1.39976	medium		1.39976						small
							small								small								small					3.50255	2.72847	1.2837	small	1.2837							small
							small								small								small					21.0724	12.9025	1.6332	large			1.6332					small
							small								small								small					2.86538	2.31871	1.23576	small	1.23576							small
							small								small								small					1.01753	1.24499	0.817295	small	0.817295							small
							small								small								small					1.87451	1.10407	1.69781	small	1.69781							small
							small								small								small					10.1916	4.45314	2.28862	medium		2.28862						small
							small								small								small					4.59941	3.83851	1.19823	medium		1.19823						small
							small								small								small					9.46849	4.50572	2.10144	medium		2.10144						small
							small								small								small					2.19121	1.72738	1.26851	small	1.26851							small
							small								small								small					3.01276	1.82223	1.65333	small	1.65333							small
							small								small								small					13.9591	5.80546	2.40447	medium		2.40447						small
							small								small								small					3.61575	1.51708	2.38336	small	2.38336							small
							small								small								small					5.74581	1.99134	2.8854	medium		2.8854						small
							small								small								small					12.7616	7.37782	1.72972	medium		1.72972						small
							small								small								small					16.6335	9.61253	1.7304	large			1.7304					small
							small								small								small					4.8117	2.68999	1.78874	medium		1.78874						small
							small								small								small					11.4901	6.05749	1.89683	medium		1.89683						small
							small								small								small					6.1177	3.09162	1.9788	medium		1.9788						small
							small								small								small					11.633	4.75559	2.44618	medium		2.44618						small
							small								small								small					2.31193	1.04987	2.20211	small	2.20211							small
							small								small								small					5.06067	1.95177	2.59286	medium		2.59286						small
							small								small								small					1.85318	1.23036	1.50621	small	1.50621							small
							small								small								small					2.53269	1.06179	2.38529	small	2.38529							small
							small								small								small					4.80542	1.41031	3.40736	medium		3.40736						small
							small								small								small					3.58188	2.46018	1.45595	small	1.45595							small
							small								small								small					2.02753	2.71275	0.747406	small	0.747406							small
							small								small								small					8.07562	3.44447	2.34452	medium		2.34452						small
							small								small								small					9.68579	5.54692	1.74616	medium		1.74616						small
							small								small								small					3.75999	1.31275	2.86422	small	2.86422							small
							small								small								small					3.04192	1.08239	2.81037	small	2.81037							small
							small								small								small					9.46661	6.58215	1.43822	medium		1.43822						small
							small								small								small					5.45952	3.4797	1.56897	medium		1.56897						small
							small								small								small					6.17477	3.81357	1.61916	medium		1.61916						small
							small								small								small					4.3404	2.82441	1.53675	medium		1.53675						small
							small								small								small					8.24369	3.35829	2.45473	medium		2.45473						small
							small								small								small					43.1867	25.8603	1.67	large			1.67					small
							small								small								small					3.11655	2.51546	1.23896	small	1.23896							small
							small								small								small					6.02395	5.04122	1.19494	medium		1.19494						small
							small								small								small					4.2548	2.35286	1.80835	medium		1.80835						small
							small								small								small					6.32435	1.55665	4.06279	medium		4.06279						small
							small								small								small					3.63143	2.82278	1.28647	small	1.28647							small
							small								small								small					20.9513	12.0451	1.73941	large			1.73941					small
							small								small								small					3.24542	1.50191	2.16087	small	2.16087							small
							small								small								small					13.4107	7.99029	1.67837	medium		1.67837						small
							small								small								small					8.7316	4.64881	1.87824	medium		1.87824						small
							small								small								small					4.20714	3.46723	1.2134	medium		1.2134						small
							small								small								small					6.30302	3.7675	1.673	medium		1.673						small
							small								small								small					8.74226	3.22387	2.71173	medium		2.71173						small
							small								small								small					7.00918	8.38271	0.836147	medium		0.836147						small
							small								small								small					11.9604	9.95453	1.2015	medium		1.2015						small
							small								small								small					4.14505	2.07156	2.00093	medium		2.00093						small
							small								small								small					41.9704	22.4131	1.87258	large			1.87258					small
							small								small								small					10.7036	5.95234	1.79822	medium		1.79822						small
							small								small								small					1.87137	1.48077	1.26378	small	1.26378							small
							small								small								small					16.0518	10.3312	1.55372	large			1.55372					small
							small								small								small					57.523	39.5666	1.45383	large			1.45383					small
							small								small								small					20.5867	12.6022	1.63357	large			1.63357					small
							small								small								small					5.2024	4.12198	1.26211	medium		1.26211						small
							small								small								small					9.38508	4.46561	2.10163	medium		2.10163						small
							small								small								small					12.3135	7.46726	1.649	medium		1.649						small
							small								small								small					7.48893	3.52197	2.12635	medium		2.12635						small
							small								small								small					3.74745	3.52956	1.06173	small	1.06173							small
							small								small								small					3.6377	1.42819	2.54706	small	2.54706							small
							small								small								small					11.8817	6.27104	1.89469	medium		1.89469						small
							small								small								small					5.42472	2.07102	2.61935	medium		2.61935						small
							small								small								small					2.52641	1.84229	1.37135	small	1.37135							small
							small								small								small					8.55412	6.31657	1.35424	medium		1.35424						small
							small								small								small					4.76968	2.59947	1.83486	medium		1.83486						small
							small								small								small					5.94179	4.03905	1.47109	medium		1.47109						small
							small								small								small					1.89771	1.86668	1.01662	small	1.01662							small
							small								small								small					52.954	45.3943	1.16653	large			1.16653					small
							small								small								small					16.6514	12.3171	1.35189	large			1.35189					small
							small								small								small					6.6307	3.28241	2.02007	medium		2.02007						small
							small								small								small					3.68599	1.47589	2.49747	small	2.49747							small
							small								small								small					3.47151	2.54636	1.36332	small	1.36332							small
							small								small								small					9.16558	4.21845	2.17274	medium		2.17274						small
							small								small								small					2.89674	1.87643	1.54375	small	1.54375							small
							small								small								small					3.43482	1.95069	1.76082	small	1.76082							small
							small								small								small					2.33326	1.51871	1.53634	small	1.53634							small
							small								small								small					13.0269	6.94042	1.87695	medium		1.87695						small
							small								small								small					1.95698	1.09377	1.7892	small	1.7892							small
							small								small								small					12.4007	13.0667	0.949024	medium		0.949024						small
							small								small								small					21.6879	10.8884	1.99183	large			1.99183					small
							small								small								small					6.68087	2.98105	2.24111	medium		2.24111						small
							small								small								small					9.27564	4.56751	2.03079	medium		2.03079						small
							small								small								small					56.8464	52.4822	1.08316	large			1.08316					small
							small								small								small					1.38283	1.06776	1.29508	small	1.29508							small
							small								small								small					10.2367	7.77566	1.31651	medium		1.31651						small
							small								small								small					4.76685	2.41736	1.97193	medium		1.97193						small
							small								small								small					1.7196	1.06017	1.62201	small	1.62201							small
							small								small								small					14.8057	9.31063	1.5902	medium		1.5902						small
							small								small								small					6.60248	3.13444	2.10643	medium		2.10643						small
							small								small								small					7.40803	4.69705	1.57717	medium		1.57717						small
							small								small								small					24.5915	14.9285	1.64728	large			1.64728					small
							small								small								small					9.4039	6.75018	1.39313	medium		1.39313						small
							small								small								small					8.08691	4.90735	1.64792	medium		1.64792						small
							small								small								small					3.43952	1.98592	1.73195	small	1.73195							small
							small								small								small					7.26066	4.08295	1.77829	medium		1.77829						small
							small								small								small					4.03749	5.50085	0.733977	medium		0.733977						small
							small								small								small					55.9891	32.3921	1.72848	large			1.72848					small
							small								small								small					1.84033	1.36315	1.35005	small	1.35005							small
							small								small								small					10.6124	5.84177	1.81664	medium		1.81664						small
							small								small								small					6.60217	2.71763	2.42938	medium		2.42938						small
							small								small								small					6.76867	2.40815	2.81074	medium		2.81074						small
							small								small								small					5.76024	2.47861	2.32398	medium		2.32398						small
							small								small								small					3.0184	1.30028	2.32135	small	2.32135							small
							small								small								small					3.45865	1.82278	1.89746	small	1.89746							small
							small								small								small					11.2226	5.86779	1.91258	medium		1.91258						small
							small								small								small					12.6308	5.81901	2.17061	medium		2.17061						small
							small								small								small					10.8821	5.89814	1.845	medium		1.845						small
							small								small								small					7.14276	3.42983	2.08254	medium		2.08254						small
							small								small								small					27.2566	14.8917	1.83032	large			1.83032					small
							small								small								small					8.26972	4.60924	1.79416	medium		1.79416						small
							small								small								small					4.59815	2.66397	1.72605	medium		1.72605						small
							small								small								small					6.41841	4.1003	1.56535	medium		1.56535						small
							small								small								small					5.35229	4.54258	1.17825	medium		1.17825						small
							small								small								small					5.09328	3.18484	1.59922	medium		1.59922						small
							small								small								small					10.0404	6.72687	1.49259	medium		1.49259						small
							small								small								small					14.061	5.77836	2.43339	medium		2.43339						small
							small								small								small					2.15233	1.30245	1.65253	small	1.65253							small
							small								small								small					2.11627	1.06505	1.98702	small	1.98702							small
							small								small								small					10.7099	9.14694	1.17087	medium		1.17087						small
							small								small								small					7.47514	5.95017	1.25629	medium		1.25629						small
							small								small								small					8.7523	4.44935	1.9671	medium		1.9671						small
							small								small								small					4.9042	3.42929	1.43009	medium		1.43009						small
							small								small								small					8.44594	4.6526	1.81532	medium		1.81532						small
							small								small								small					6.02896	3.65531	1.64937	medium		1.64937						small
							small								small								small					2.13257	1.77237	1.20323	small	1.20323							small
							small								small								small					3.86064	1.41898	2.72072	small	2.72072							small
							small								small								small					7.28637	4.38865	1.66028	medium		1.66028						small
							small								small								small					4.20651	1.68402	2.49789	medium		2.49789						small
							small								small								small					3.22692	2.65693	1.21453	small	1.21453							small
							small								small								small					9.59674	4.55016	2.1091	medium		2.1091						small
							small								small								small					5.41218	3.95233	1.36936	medium		1.36936						small
							small								small								small					9.24742	4.23742	2.18232	medium		2.18232						small
							small								small								small					3.14038	1.40109	2.24138	small	2.24138							small
							small								small								small					4.25699	2.70842	1.57176	medium		1.57176						small
							small								small								small					23.7609	12.7605	1.86206	large			1.86206					small
							small								small								small					16.1908	8.09436	2.00025	large			2.00025					small
							small								small								small					6.17132	2.6824	2.30067	medium		2.30067						small
							small								small								small					7.74418	4.86073	1.59321	medium		1.59321						small
							small								small								small					2.5468	1.56099	1.63153	small	1.63153							small
							small								small								small					8.9812	4.73445	1.89699	medium		1.89699						small
							small								small								small					4.91235	2.22115	2.21162	medium		2.21162						small
							small								small								small					8.69241	6.08242	1.4291	medium		1.4291						small
							small								small								small					11.3358	6.81251	1.66397	medium		1.66397						small
							small								small								small					4.10868	3.00544	1.36708	medium		1.36708						small
							small								small								small					7.36319	5.07212	1.4517	medium		1.4517						small
							small								small								small					10.9441	7.85425	1.3934	medium		1.3934						small
							small								small								small					13.617	6.28839	2.16542	medium		2.16542						small
							small								small								small					13.5587	9.04504	1.49902	medium		1.49902						small
							small								small								small					1.49885	2.55937	0.585633	small	0.585633							small
							small								small								small					4.69505	3.50734	1.33864	medium		1.33864						small
							small								small								small					2.91273	1.60977	1.80941	small	1.80941							small
							small								small								small					36.0531	23.0787	1.56218	large			1.56218					small
							small								small								small					2.83904	1.66126	1.70897	small	1.70897							small
							small								small								small					8.03705	5.38486	1.49253	medium		1.49253						small
							small								small								small					6.72665	3.11438	2.15987	medium		2.15987						small
							small								small								small					2.46934	2.10516	1.173	small	1.173							small
							small								small								small					3.67533	1.21735	3.01912	small	3.01912							small
							small								small								small					10.2944	4.8125	2.1391	medium		2.1391						small
							small								small								small					46.6009	28.3574	1.64334	large			1.64334					small
							small								small								small					5.79379	3.23308	1.79203	medium		1.79203						small
							small								small								small					1.34991	1.04174	1.29582	small	1.29582							small
							small								small								small					3.79511	2.34419	1.61894	small	1.61894							small
							small								small								small					60.3044	50.1429	1.20265	large			1.20265					small
							small								small								small					2.98548	2.04662	1.45873	small	1.45873							small
							small								small								small					6.18669	1.8011	3.43496	medium		3.43496						small
							small								small								small					1.1486	1.2103	0.949015	small	0.949015							small
							small								small								small					6.33219	4.47591	1.41473	medium		1.41473						small
							small								small								small					6.33344	3.97184	1.59459	medium		1.59459						small
							small								small								small					1.5161	1.24337	1.21935	small	1.21935							small
							small								small								small					4.52697	2.2244	2.03514	medium		2.03514						small
							small								small								small					10.6205	5.88459	1.8048	medium		1.8048						small
							small								small								small					7.27038	4.78268	1.52015	medium		1.52015						small
							small								small								small					7.43124	2.77292	2.67994	medium		2.67994						small
							small								small								small					4.07857	3.13877	1.29942	medium		1.29942						small
							small								small								small					4.28365	2.52847	1.69416	medium		1.69416						small
							small								small								small					11.7359	5.01196	2.34158	medium		2.34158						small
							small								small								small					3.82678	2.1534	1.77709	small	1.77709							small
							small								small								small					1.4076	1.75069	0.804029	small	0.804029							small
							small								small								small					5.6461	2.90896	1.94093	medium		1.94093						small
							small								small								small					3.05352	1.38266	2.20843	small	2.20843							small
							small								small								small					9.00504	5.70735	1.5778	medium		1.5778						small
							small								small								small					4.51694	2.72251	1.65911	medium		1.65911						small
							small								small								small					3.64961	1.10949	3.28945	small	3.28945							small
							small								small								small					14.2153	9.37784	1.51584	medium		1.51584						small
							small								small								small					6.13526	3.17725	1.931	medium		1.931						small
							small								small								small					1.69327	1.00868	1.6787	small	1.6787							small
							small								small								small					14.2843	8.25859	1.72963	medium		1.72963						small
							small								small								small					4.38273	2.07264	2.11456	medium		2.11456						small
							small								small								small					7.75077	2.24717	3.44913	medium		3.44913						small
							small								small								small					8.68363	4.19244	2.07126	medium		2.07126						small
							small								small								small					17.6999	11.3844	1.55476	large			1.55476					small
							small								small								small					3.62359	2.18213	1.66058	small	1.66058							small
							small								small								small					14.6571	3.10571	4.7194	medium		4.7194						small
							small								small								small					2.00307	1.42928	1.40146	small	1.40146							small
							small								small								small					17.4118	12.2754	1.41843	large			1.41843					small
							small								small								small					17.0734	10.5486	1.61856	large			1.61856					small
							small								small								small					1.74783	1.3805	1.26609	small	1.26609							small
							small								small								small					6.45636	2.58809	2.49464	medium		2.49464						small
							small								small								small					13.9497	9.13989	1.52624	medium		1.52624						small
							small								small								small					12.2229	6.88785	1.77456	medium		1.77456						small
							small								small								small					7.41493	3.89542	1.9035	medium		1.9035						small
							small								small								small					9.15178	4.64773	1.96909	medium		1.96909						small
							small								small								small					8.34905	3.88674	2.14808	medium		2.14808						small
							small								small								small					4.81671	1.95394	2.46512	medium		2.46512						small
							small								small								small					4.37019	1.95123	2.23971	medium		2.23971						small
							small								small								small					9.2054	1.78917	5.14507	medium		5.14507						small
							small								small								small					9.59391	6.47701	1.48123	medium		1.48123						small
							small								small								small					11.2157	7.651	1.46591	medium		1.46591						small
							small								small								small					4.48966	2.6217	1.7125	medium		1.7125						small
							small								small								small					22.5468	13.702	1.64551	large			1.64551					small
							small								small								small					7.77804	5.21412	1.49173	medium		1.49173						small
							small								small								small					11.7224	6.10736	1.91939	medium		1.91939						small
							small								small								small					34.9198	19.831	1.76087	large			1.76087					small
							small								small								small					41.4756	27.0414	1.53378	large			1.53378					small
							small								small								small					85.1584	63.814	1.33448	large			1.33448					small
							small								small								small					48.6757	32.8712	1.4808	large			1.4808					small
							small								small								small					33.9387	23.1682	1.46488	large			1.46488					small
							small								small								small					5.77153	3.1301	1.84388	medium		1.84388						small
							small								small								small					8.96459	4.02604	2.22665	medium		2.22665						small
							small								small								small					40.548	23.2663	1.74278	large			1.74278					small
							small								small								small					23.4796	14.4955	1.61979	large			1.61979					small
							small								small								small					41.0817	27.3254	1.50343	large			1.50343					small
							small								small								small					5.94117	1.70245	3.48977	medium		3.48977						small
							small								small								small					56.1079	38.8609	1.44381	large			1.44381					small
							small								small								small					13.6885	10.0711	1.35919	medium		1.35919						small
							small								small								small					5.00673	2.73877	1.8281	medium		1.8281						small
							small								small								small					44.0076	32.3287	1.36126	large			1.36126					small
							small								small								small					31.7258	16.4885	1.92412	large			1.92412					small
							small								small								small					7.08914	4.40978	1.60759	medium		1.60759						small
							small								small								small					26.7062	17.9248	1.48991	large			1.48991					small
							small								small								small					3.20529	2.6347	1.21656	small	1.21656							small
							small								small								small					5.01551	1.87427	2.67599	medium		2.67599						small
							small								small								small					1.73183	1.258	1.37665	small	1.37665							small
							small								small								small					1.88987	1.06613	1.77264	small	1.77264							small
							small								small								small					9.01946	4.43201	2.03507	medium		2.03507						small
							small								small								small					8.82975	5.84828	1.5098	medium		1.5098						small
							small								small								small					28.3023	16.9492	1.66984	large			1.66984					small
							small								small								small					1.48788	1.08944	1.36573	small	1.36573							small
							small								small								small					13.0761	8.28298	1.57867	medium		1.57867						small
							small								small								small					12.5117	9.33014	1.34099	medium		1.34099						small
							small								small								small					9.10632	5.31819	1.7123	medium		1.7123						small
							small								small								small					14.1124	7.10736	1.98561	medium		1.98561						small
							small								small								small					12.184	4.62875	2.63224	medium		2.63224						small
							small								small								small					46.1951	30.1731	1.531	large			1.531					small
							small								small								small					17.6385	10.0017	1.76355	large			1.76355					small
							small								small								small					11.263	5.53012	2.03667	medium		2.03667						small
							small								small								small					14.1607	7.62986	1.85596	medium		1.85596						small
							small								small								small					12.6606	6.73554	1.87967	medium		1.87967						small
							small								small								small					50.3151	36.6794	1.37175	large			1.37175					small
							small								small								small					3.16672	1.02656	3.08477	small	3.08477							small
							small								small								small					5.22686	2.66668	1.96006	medium		1.96006						small
							small								small								small					16.0509	7.82227	2.05195	large			2.05195					small
							small								small								small					1.44304	1.40814	1.02479	small	1.02479							small
							small								small								small					2.89736	1.24608	2.32519	small	2.32519							small
							small								small								small					22.5377	13.2369	1.70263	large			1.70263					small
							small								small								small					17.4714	10.2597	1.70291	large			1.70291					small
							small								small								small					16.7972	9.22336	1.82116	large			1.82116					small
							small								small								small					38.1455	14.3302	2.6619	large			2.6619					small
							small								small								small					6.28954	2.94094	2.13862	medium		2.13862						small
							small								small								small					18.4575	2.40327	7.68019	large			7.68019					small
							small								small								small					12.3941	6.02714	2.05638	medium		2.05638						small
							small								small								small					7.75892	4.51981	1.71665	medium		1.71665						small
							small								small								small					31.2643	18.4007	1.69908	large			1.69908					small
							small								small								small					10.3797	7.15723	1.45024	medium		1.45024						small
							small								small								small					6.22526	3.65097	1.7051	medium		1.7051						small
							small								small								small					14.4423	7.18866	2.00904	medium		2.00904						small
							small								small								small					4.99764	3.33986	1.49636	medium		1.49636						small
							small								small								small					1.56031	1.21464	1.28459	small	1.28459							small
							small								small								small					5.83549	2.29486	2.54285	medium		2.54285						small
							small								small								small					4.31406	3.42387	1.26	medium		1.26						small
							small								small								small					8.19352	4.56209	1.796	medium		1.796						small
							small								small								small					5.87688	2.78321	2.11155	medium		2.11155						small
							small								small								small					6.83828	4.28295	1.59663	medium		1.59663						small
							small								small								small					12.157	7.05641	1.72283	medium		1.72283						small
							small								small								small					16.4526	8.5632	1.92131	large			1.92131					small
							small								small								small					2.31507	1.47426	1.57032	small	1.57032							small
							small								small								small					3.42761	2.01248	1.70318	small	1.70318							small
							small								small								small					6.26759	3.79135	1.65313	medium		1.65313						small
							small								small								small					2.84218	1.83741	1.54684	small	1.54684							small
							small								small								small					2.5769	1.58754	1.6232	small	1.6232							small
							small								small								small					12.7867	9.27269	1.37896	medium		1.37896						small
							small								small								small					2.49161	2.25909	1.10292	small	1.10292							small
							small								small								small					11.1448	9.30087	1.19826	medium		1.19826						small
							small								small								small					4.38681	1.16803	3.75574	medium		3.75574						small
							small								small								small					28.7454	20.9373	1.37293	large			1.37293					small
							small								small								small					13.9795	7.29273	1.91691	medium		1.91691						small
							small								small								small					6.039	1.86505	3.23798	medium		3.23798						small
							small								small								small					8.8031	5.14421	1.71126	medium		1.71126						small
							small								small								small					2.92778	1.89974	1.54115	small	1.54115							small
							small								small								small					4.99889	3.30083	1.51443	medium		1.51443						small
							small								small								small					2.31727	1.06017	2.18575	small	2.18575							small
							small								small								small					6.99005	2.85422	2.44902	medium		2.44902						small
							small								small								small					1.75974	1.00922	1.74366	small	1.74366							small
							small								small								small					4.27079	3.97943	1.07322	medium		1.07322						small
							small								small								small					13.6521	6.99246	1.95241	medium		1.95241						small
							small								small								small					5.54701	3.19568	1.73578	medium		1.73578						small
							small								small								small					8.21986	4.62117	1.77874	medium		1.77874						small
							small								small								small					13.9346	5.60003	2.48831	medium		2.48831						small
							small								small								small					7.56137	1.79676	4.20834	medium		4.20834						small
							small								small								small					8.96615	4.29434	2.0879	medium		2.0879						small
							small								small								small					5.24912	3.26777	1.60633	medium		1.60633						small
							small								small								small					2.96133	1.88131	1.57408	small	1.57408							small
							small								small								small					6.71066	2.86289	2.34402	medium		2.34402						small
							small								small								small					5.07227	2.7805	1.82423	medium		1.82423						small
							small								small								small					2.44896	1.51275	1.61889	small	1.61889							small
							small								small								small					8.70746	4.98377	1.74716	medium		1.74716						small
							small								small								small					7.62377	4.34583	1.75427	medium		1.75427						small
							small								small								small					12.3257	7.48514	1.64669	medium		1.64669						small
							small								small								small					13.3934	6.78703	1.97338	medium		1.97338						small
							small								small								small					8.51556	2.82441	3.01499	medium		3.01499						small
							small								small								small					6.44319	4.05531	1.58883	medium		1.58883						small
							small								small								small					1.25302	1.89757	0.660325	small	0.660325							small
							small								small								small					8.61496	3.80002	2.26708	medium		2.26708						small
							small								small								small					4.28616	2.6282	1.63083	medium		1.63083						small
							small								small								small					58.2326	38.8653	1.49832	large			1.49832					small
							small								small								small					5.31121	3.14473	1.68892	medium		1.68892						small
							small								small								small					4.67184	3.24392	1.44018	medium		1.44018						small
							small								small								small					7.7401	4.53716	1.70594	medium		1.70594						small
							small								small								small					6.05875	2.23958	2.70531	medium		2.70531						small
							small								small								small					2.52516	1.12684	2.24093	small	2.24093							small
							small								small								small					5.97942	5.41413	1.10441	medium		1.10441						small
							small								small								small					2.62111	1.63903	1.59918	small	1.59918							small
							small								small								small					2.84751	1.17182	2.42998	small	2.42998							small
							small								small								small					9.68234	5.6228	1.72198	medium		1.72198						small
							small								small								small					4.36862	2.95828	1.47674	medium		1.47674						small
							small								small								small					7.64854	3.05259	2.50559	medium		2.50559						small
							small								small								small					4.47398	2.8824	1.55217	medium		1.55217						small
							small								small								small					7.85644	4.76697	1.6481	medium		1.6481						small
							small								small								small					7.92636	4.24826	1.86579	medium		1.86579						small
							small								small								small					1.66348	1.77454	0.937415	small	0.937415							small
							small								small								small					6.48615	3.91656	1.65608	medium		1.65608						small
							small								small								small					1.43489	1.39893	1.02571	small	1.02571							small
							small								small								small					3.97666	1.56315	2.544	small	2.544							small
							small								small								small					2.74685	1.28619	2.13566	small	2.13566							small
							small								small								small					22.1855	11.6017	1.91227	large			1.91227					small
							small								small								small					18.3011	13.5903	1.34662	large			1.34662					small
							small								small								small					5.33159	3.29812	1.61655	medium		1.61655						small
							small								small								small					2.97983	1.72738	1.72506	small	1.72506							small
							small								small								small					7.96681	4.38973	1.81488	medium		1.81488						small
							small								small								small					4.6963	1.44662	3.24639	medium		3.24639						small
							small								small								small					2.74152	1.80814	1.51621	small	1.51621							small
							small								small								small					4.60944	1.77345	2.59914	medium		2.59914						small
							small								small								small					1.3706	1.29215	1.06072	small	1.06072							small
							small								small								small					2.14324	1.40977	1.52028	small	1.52028							small
							small								small								small					20.7325	11.0841	1.87047	large			1.87047					small
							small								small								small					3.20278	2.42332	1.32165	small	1.32165							small
							small								small								small					2.70327	3.26072	0.829039	small	0.829039							small
							small								small								small					4.17578	1.41681	2.94731	medium		2.94731						small
							small								small								small					7.31898	2.35286	3.11067	medium		3.11067						small
							small								small								small					6.0575	3.96642	1.5272	medium		1.5272						small
							small								small								small					10.1254	4.99136	2.02859	medium		2.02859						small
							small								small								small					3.54175	1.5534	2.28	small	2.28							small
							small								small								small					39.497	25.2863	1.56199	large			1.56199					small
							small								small								small					6.42814	2.79785	2.29753	medium		2.29753						small
							small								small								small					17.5742	11.8299	1.48558	large			1.48558					small
							small								small								small					33.3062	23.1411	1.43927	large			1.43927					small
							small								small								small					5.61537	3.38051	1.6611	medium		1.6611						small
							small								small								small					10.2223	5.39949	1.8932	medium		1.8932						small
							small								small								small					10.2336	5.63472	1.81617	medium		1.81617						small
							small								small								small					84.1252	72.0091	1.16826	large			1.16826					small
							small								small								small					7.85644	3.92902	1.99959	medium		1.99959						small
							small								small								small					6.36009	3.99894	1.59044	medium		1.59044						small
							small								small								small					12.2364	8.05154	1.51975	medium		1.51975						small
							small								small								small					7.65575	4.61304	1.65959	medium		1.65959						small
							small								small								small					14.8728	11.2044	1.32741	medium		1.32741						small
							small								small								small					11.4477	4.6667	2.45307	medium		2.45307						small
							small								small								small					39.0639	26.9026	1.45205	large			1.45205					small
							small								small								small					31.1708	15.8164	1.9708	large			1.9708					small
							small								small								small					21.7936	9.75995	2.23296	large			2.23296					small
							small								small								small					12.3216	8.74423	1.40912	medium		1.40912						small
							small								small								small					11.6487	6.47104	1.80013	medium		1.80013						small
							small								small								small					2.21191	1.60109	1.3815	small	1.3815							small
							small								small								small					7.89438	4.11981	1.9162	medium		1.9162						small
							small								small								small					26.8144	14.4613	1.85421	large			1.85421					small
							small								small								small					44.9885	36.0815	1.24686	large			1.24686					small
							small								small								small					41.1927	28.2885	1.45616	large			1.45616					small
							small								small								small					10.7024	6.67863	1.60248	medium		1.60248						small
							small								small								small					7.509	4.97781	1.5085	medium		1.5085						small
							small								small								small					18.3308	10.3068	1.77851	large			1.77851					small
							small								small								small					23.9669	9.85264	2.43254	large			2.43254					small
							small								small								small					9.96267	6.22768	1.59974	medium		1.59974						small
							small								small								small					10.3252	5.92741	1.74193	medium		1.74193						small
							small								small								small					5.60345	2.72576	2.05574	medium		2.05574						small
							small								small								small					7.41148	4.01954	1.84387	medium		1.84387						small
							small								small								small					5.77058	3.90843	1.47645	medium		1.47645						small
							small								small								small					8.14805	4.86019	1.67649	medium		1.67649						small
							small								small								small					2.41384	2.14744	1.12406	small	1.12406							small
							small								small								small					60.5317	42.4837	1.42482	large			1.42482					small
							small								small								small					9.95232	7.00872	1.41999	medium		1.41999						small
							small								small								small					6.96747	4.24935	1.63966	medium		1.63966						small
							small								small								small					40.0075	25.1519	1.59063	large			1.59063					small
							small								small								small					34.0027	21.0435	1.61583	large			1.61583					small
							small								small								small					6.33563	1.31762	4.80838	medium		4.80838						small
							small								small								small					6.62819	3.6423	1.81978	medium		1.81978						small
							small								small								small					1.31322	1.11003	1.18305	small	1.18305							small
							small								small								small					36.4259	25.1481	1.44845	large			1.44845					small
							small								small								small					9.97145	6.58541	1.51417	medium		1.51417						small
							small								small								small					6.25818	4.7106	1.32853	medium		1.32853						small
							small								small								small					9.95546	6.37728	1.56108	medium		1.56108						small
							small								small								small					27.7661	20.2619	1.37036	large			1.37036					small
							small								small								small					8.06935	3.92523	2.05577	medium		2.05577						small
							small								small								small					4.94371	7.34801	0.672795	medium		0.672795						small
							small								small								small					1.03446	1.74364	0.593275	small	0.593275							small
							small								small								small					9.06148	4.21032	2.1522	medium		2.1522						small
							small								small								small					6.90382	4.45098	1.55108	medium		1.55108						small
							small								small								small					24.9732	13.1036	1.90582	large			1.90582					small
							small								small								small					37.6231	22.5942	1.66517	large			1.66517					small
							small								small								small					4.12059	2.47915	1.6621	medium		1.6621						small
							small								small								small					14.3871	8.27268	1.73911	medium		1.73911						small
							small								small								small					12.1699	7.98975	1.52319	medium		1.52319						small
							small								small								small					14.0591	8.13826	1.72753	medium		1.72753						small
							small								small								small					26.716	18.3714	1.45422	large			1.45422					small
							small								small								small					6.74076	4.01791	1.67768	medium		1.67768						small
							small								small								small					11.8394	6.58161	1.79886	medium		1.79886						small
							small								small								small					7.11893	2.34636	3.03404	medium		3.03404						small
							small								small								small					32.971	23.1926	1.42162	large			1.42162					small
							small								small								small					6.11081	2.99677	2.03913	medium		2.03913						small
							small								small								small					6.05342	4.96643	1.21887	medium		1.21887						small
							small								small								small					3.35486	2.32359	1.44382	small	1.44382							small
							small								small								small					5.70913	3.21357	1.77657	medium		1.77657						small
							small								small								small					6.79125	3.78322	1.7951	medium		1.7951						small
							small								small								small					9.18753	4.20436	2.18524	medium		2.18524						small
							small								small								small					7.65136	4.12848	1.85331	medium		1.85331						small
							small								small								small					4.18707	3.06831	1.36462	medium		1.36462						small
							small								small								small					65.5281	47.4886	1.37987	large			1.37987					small
							small								small								small					9.31735	2.54094	3.66689	medium		3.66689						small
							small								small								small					3.96632	2.05421	1.93082	small	1.93082							small
							small								small								small					5.29553	2.52143	2.10021	medium		2.10021						small
							small								small								small					4.93649	3.53607	1.39604	medium		1.39604						small
							small								small								small					15.7047	7.86346	1.99718	medium		1.99718						small
							small								small								small					5.97848	4.14691	1.44167	medium		1.44167						small
							small								small								small					20.6478	15.3302	1.34687	large			1.34687					small
							small								small								small					3.12345	2.06885	1.50975	small	1.50975							small
							small								small								small					11.6055	7.17078	1.61844	medium		1.61844						small
							small								small								small					1.39161	1.51979	0.91566	small	0.91566							small
							small								small								small					17.1321	10.0375	1.70681	large			1.70681					small
							small								small								small					3.40973	2.26505	1.50537	small	1.50537							small
							small								small								small					6.72822	3.7404	1.7988	medium		1.7988						small
							small								small								small					7.25815	4.63472	1.56604	medium		1.56604						small
							small								small								small					10.8595	6.75885	1.6067	medium		1.6067						small
							small								small								small					34.4583	25.0657	1.37472	large			1.37472					small
							small								small								small					9.13203	4.6526	1.96278	medium		1.96278						small
							small								small								small					3.35612	1.97237	1.70157	small	1.70157							small
							small								small								small					45.7702	28.8322	1.58747	large			1.58747					small
							small								small								small					4.62512	2.26343	2.04341	medium		2.04341						small
							small								small								small					31.8259	19.2218	1.65572	large			1.65572					small
							small								small								small					4.13345	2.67807	1.54345	medium		1.54345						small
							small								small								small					30.6155	18.7367	1.63399	large			1.63399					small
							small								small								small					4.96722	2.04771	2.42575	medium		2.42575						small
							small								small								small					7.12363	2.24879	3.16775	medium		3.16775						small
							small								small								small					15.6517	11.006	1.4221	medium		1.4221						small
							small								small								small					2.0131	1.47589	1.36399	small	1.36399							small
							small								small								small					5.47364	3.77401	1.45035	medium		1.45035						small
							small								small								small					9.59015	5.19895	1.84463	medium		1.84463						small
							small								small								small					2.84908	1.30299	2.18657	small	2.18657							small
							small								small								small					25.0164	12.3578	2.02434	large			2.02434					small
							small								small								small					2.6625	1.81735	1.46504	small	1.46504							small
							small								small								small					6.56391	2.86668	2.28972	medium		2.28972						small
							small								small								small					5.68843	2.0515	2.77281	medium		2.77281						small
							small								small								small					3.95973	1.47101	2.69184	small	2.69184							small
							small								small								small					9.30574	4.24284	2.19328	medium		2.19328						small
							small								small								small					9.45187	6.93446	1.36303	medium		1.36303						small
							small								small								small					7.98625	3.7713	2.11764	medium		2.11764						small
							small								small								small					5.52506	2.3198	2.3817	medium		2.3817						small
							small								small								small					7.40678	2.61302	2.83456	medium		2.83456						small
							small								small								small					7.66077	4.61087	1.66146	medium		1.66146						small
							small								small								small					14.4012	5.8499	2.46179	medium		2.46179						small
							small								small								small					5.05189	2.55882	1.9743	medium		1.9743						small
							small								small								small					8.6275	5.2499	1.64337	medium		1.64337						small
							small								small								small					1.96481	1.22006	1.61042	small	1.61042							small
							small								small								small					6.1315	2.37563	2.581	medium		2.581						small
							small								small								small					3.37117	1.79405	1.87908	small	1.87908							small
							small								small								small					38.6949	25.4489	1.52049	large			1.52049					small
							small								small								small					2.98391	2.44771	1.21906	small	1.21906							small
							small								small								small					1.15769	1.01898	1.13613	small	1.13613							small
							small								small								small					7.10293	4.03417	1.76069	medium		1.76069						small
							small								small								small					3.0761	1.1767	2.61417	small	2.61417							small
							small								small								small					51.7258	34.6376	1.49334	large			1.49334					small
							small								small								small					2.85002	1.80435	1.57953	small	1.57953							small
							small								small								small					3.28368	2.86343	1.14676	small	1.14676							small
							small								small								small					2.40538	1.129	2.13053	small	2.13053							small
							small								small								small					5.50876	2.16207	2.5479	medium		2.5479						small
							small								small								small					11.2781	3.83092	2.94397	medium		2.94397						small
							small								small								small					1.71239	1.29486	1.32245	small	1.32245							small
							small								small								small					6.02081	3.16208	1.90407	medium		1.90407						small
							small								small								small					4.88476	2.66777	1.83103	medium		1.83103						small
							small								small								small					3.80263	1.92847	1.97184	small	1.97184							small
							small								small								small					2.93938	1.25963	2.33353	small	2.33353							small
							small								small								small					32.0024	18.2131	1.75711	large			1.75711					small
							small								small								small					14.7543	8.12038	1.81695	medium		1.81695						small
							small								small								small					13.7308	4.99298	2.75002	medium		2.75002						small
							small								small								small					26.1647	14.4467	1.81112	large			1.81112					small
							small								small								small					2.42482	1.94906	1.24409	small	1.24409							small
							small								small								small					20.8726	13.0667	1.59739	large			1.59739					small
							small								small								small					44.139	29.604	1.49098	large			1.49098					small
							small								small								small					4.15069	1.29703	3.20016	medium		3.20016						small
							small								small								small					2.34486	1.16044	2.02066	small	2.02066							small
							small								small								small					12.6139	5.30518	2.37765	medium		2.37765						small
							small								small								small					11.9469	7.94097	1.50447	medium		1.50447						small
							small								small								small					10.122	5.54854	1.82426	medium		1.82426						small
							small								small								small					2.6716	1.10028	2.42811	small	2.42811							small
							small								small								small					3.19149	1.80489	1.76825	small	1.76825							small
							small								small								small					1.56941	1.72142	0.911694	small	0.911694							small
							small								small								small					1.97015	1.03957	1.89515	small	1.89515							small
							small								small								small					15.7445	7.72634	2.03778	medium		2.03778						small
							small								small								small					1.90869	2.20923	0.863961	small	0.863961							small
							small								small								small					8.21704	6.52416	1.25948	medium		1.25948						small
							small								small								small					12.9566	9.06726	1.42894	medium		1.42894						small
							small								small								small					8.47166	1.8954	4.46958	medium		4.46958						small
							small								small								small					3.90266	2.77725	1.40522	small	1.40522							small
							small								small								small					5.40496	3.24338	1.66646	medium		1.66646						small
							small								small								small					1.92844	1.9805	0.973714	small	0.973714							small
							small								small								small					2.18431	1.35448	1.61266	small	1.61266							small
							small								small								small					11.4524	8.35236	1.37116	medium		1.37116						small
							small								small								small					34.0917	28.327	1.20351	large			1.20351					small
							small								small								small					6.22212	2.52901	2.4603	medium		2.4603						small
							small								small								small					23.8459	8.00276	2.97971	large			2.97971					small
							small								small								small					15.1459	9.30358	1.62797	medium		1.62797						small
							small								small								small					24.0058	13.902	1.72679	large			1.72679					small
							small								small								small					2.74372	1.95882	1.4007	small	1.4007							small
							small								small								small					12.7246	8.04829	1.58103	medium		1.58103						small
							small								small								small					29.8488	18.4603	1.61692	large			1.61692					small
							small								small								small					6.65955	3.88078	1.71603	medium		1.71603						small
							small								small								small					3.55648	4.28729	0.829541	small	0.829541							small
							small								small								small					2.8058	1.91166	1.46773	small	1.46773							small
							small								small								small					39.2195	29.204	1.34295	large			1.34295					small
[truncated: 1,118 more rows]

## Sheet: nc4
avg 5':3' ratio of small (<8), medium (<32), large (>32)				nc4_1								nc4_2								nc4_3								nc4_4								nc4_5
					Avg 5':3'	2.91925							Avg 5':3'	1.68372							Avg 5':3'	1.63735							Avg 5':3'	1.98076							Avg 5':3'	1.85355
					StDev	1.25247							StDev	0.601363							StDev	0.643716							StDev	0.989178							StDev	0.526057
sample	nc4_1			5'	3'	5':3'		5':3' smalls	5':3' mediums	5':3' larges		5'	3'	5':3'		5':3' smalls	5':3' mediums	5':3' larges		5'	3'	5':3'		5':3' smalls	5':3' mediums	5':3' larges		5'	3'	5':3'		5':3' smalls	5':3' mediums	5':3' larges		5'	3'	5':3'		5':3' smalls	5':3' mediums	5':3' larges
	avg	stdev		15.2931	5.42681	2.81806	medium		2.81806			10.3126	5.3413	1.93072	medium		1.93072			5.10379	2.70243	1.88859	medium		1.88859			5.74783	4.97709	1.15486	medium		1.15486			14.6912	8.17231	1.79768	medium		1.79768
small	2.02522	0.691805		7.68745	2.1046	3.65269	medium		3.65269			2.65466	1.11269	2.38581	small	2.38581				12.4432	8.11334	1.53368	medium		1.53368			2.67691	4.799	0.557805	small	0.557805				3.96814	2.50743	1.58255	small	1.58255
medium	3.03552	0.871239		18.0152	6.94776	2.59295	large			2.59295		4.68169	3.03387	1.54314	medium		1.54314			8.68764	4.48754	1.93595	medium		1.93595			15.5392	6.23238	2.4933	medium		2.4933			19.1642	18.202	1.05286	large			1.05286
larger	2.84451	1.89276		41.8511	15.4616	2.70677	large			2.70677		3.02728	2.61211	1.15894	small	1.15894				6.18498	3.11759	1.9839	medium		1.9839			1.11965	1.17485	0.953015	small	0.953015				10.9345	7.01337	1.5591	medium		1.5591
				19.7071	7.55022	2.61014	large			2.61014		5.85063	3.99146	1.46579	medium		1.46579			8.67925	5.53479	1.56813	medium		1.56813			1.86665	3.30434	0.56491	small	0.56491				8.23518	4.60942	1.7866	medium		1.7866
sample	nc4_2			12.1378	4.41049	2.75203	medium		2.75203			4.51102	1.56747	2.87791	medium		2.87791			3.15738	1.78933	1.76456	small	1.76456				4.94527	3.00081	1.64798	medium		1.64798			4.92608	2.66453	1.84876	medium		1.84876
	avg	stdev		7.01733	3.99897	1.75478	medium		1.75478			24.5663	14.5105	1.69301	large			1.69301		5.01049	3.5551	1.40938	medium		1.40938			10.8589	9.15084	1.18666	medium		1.18666			2.71326	1.5371	1.76518	small	1.76518
small	1.45639	0.569789		22.0618	7.82394	2.81978	large			2.81978		4.24255	3.43412	1.23541	medium		1.23541			6.28022	5.85024	1.0735	medium		1.0735			5.42646	5.61575	0.966294	medium		0.966294			7.50738	4.57744	1.64008	medium		1.64008
medium	1.83648	0.621879		63.3625	26.4229	2.39801	large			2.39801		6.23909	4.67339	1.33503	medium		1.33503			1.14092	1.35605	0.841354	small	0.841354				4.0316	1.64116	2.45656	medium		2.45656			5.44878	3.53232	1.54255	medium		1.54255
larger	1.72918	0.439891		20.6888	7.92928	2.60916	large			2.60916		15.9866	8.96804	1.78262	medium		1.78262			28.9575	19.3866	1.49369	large			1.49369		7.19483	3.46616	2.07574	medium		2.07574			26.212	16.0163	1.63658	large			1.63658
				3.4193	1.31731	2.59566	small	2.59566				1.39306	1.1392	1.22284	small	1.22284				3.48151	3.14116	1.10835	small	1.10835				5.17006	2.82367	1.83097	medium		1.83097			5.7461	3.75856	1.5288	medium		1.5288
sample	nc4_3			5.28954	1.32014	4.00681	medium		4.00681			3.93131	3.27402	1.20076	small	1.20076				23.1974	19.0748	1.21613	large			1.21613		5.93244	17.8871	0.331661	medium		0.331661			9.17485	3.8324	2.39402	medium		2.39402
	avg	stdev		10.2459	3.89927	2.62766	medium		2.62766			3.24071	2.15833	1.50149	small	1.50149				2.27409	1.20316	1.89009	small	1.89009				2.87264	25.6132	0.112155	small	0.112155				11.3189	5.68088	1.99246	medium		1.99246
small	1.50525	0.529552		10.0622	4.51348	2.22936	medium		2.22936			4.21681	2.98935	1.41061	medium		1.41061			6.17594	3.53939	1.74492	medium		1.74492			5.36407	11.5149	0.465837	medium		0.465837			6.25489	3.14428	1.98929	medium		1.98929
medium	1.70286	0.442743		21.1365	9.20004	2.29744	large			2.29744		10.5929	4.48577	2.36145	medium		2.36145			19.8218	9.29536	2.13244	large			2.13244		4.58629	2.00118	2.2918	medium		2.2918			9.25236	6.61452	1.39879	medium		1.39879
larger	1.68169	1.32299		3.22282	2.40653	1.3392	small	1.3392				7.92359	5.09165	1.5562	medium		1.5562			10.3293	6.1125	1.68986	medium		1.68986			9.12131	6.25631	1.45794	medium		1.45794			5.22937	2.83291	1.84593	medium		1.84593
				4.76456	3.29681	1.4452	medium		1.4452			17.2862	10.6066	1.62977	large			1.62977		4.46134	3.04568	1.46481	medium		1.46481			5.95979	1.43721	4.14678	medium		4.14678			5.04931	1.95054	2.58867	medium		2.58867
sample	nc4_4			41.5736	15.5044	2.6814	large			2.6814		4.17682	2.83375	1.47395	medium		1.47395			6.6305	7.46916	0.887717	medium		0.887717			4.52903	3.26604	1.38671	medium		1.38671			5.56326	3.09066	1.80002	medium		1.80002
	avg	stdev		13.8285	3.93971	3.51003	medium		3.51003			7.04491	4.43424	1.58875	medium		1.58875			2.2544	2.20328	1.0232	small	1.0232				2.26751	3.6318	0.624348	small	0.624348				2.20328	1.26101	1.74724	small	1.74724
small	1.51845	0.699033		7.0567	2.45262	2.87721	medium		2.87721			10.9564	6.77368	1.6175	medium		1.6175			9.25068	5.17705	1.78686	medium		1.78686			3.79827	1.6402	2.31574	small	2.31574				12.2117	6.47671	1.88547	medium		1.88547
medium	2.13324	0.891036		6.98375	1.82571	3.82522	medium		3.82522			3.37139	2.46202	1.36936	small	1.36936				1.25682	1.854	0.677897	small	0.677897				3.42477	2.75569	1.2428	small	1.2428				3.51142	1.20127	2.92308	small	2.92308
larger	2.2079	1.61489		6.62321	4.07469	1.62545	medium		1.62545			13.6919	9.35027	1.46433	medium		1.46433			4.50847	3.79078	1.18933	medium		1.18933			5.69569	7.44649	0.764883	medium		0.764883			6.67504	3.06385	2.17864	medium		2.17864
				11.4993	6.59645	1.74326	medium		1.74326			16.6376	10.7486	1.54788	large			1.54788		8.65827	5.54809	1.56059	medium		1.56059			1.84272	3.73809	0.492958	small	0.492958				2.12736	1.90115	1.11899	small	1.11899
sample	nc4_5			4.81281	1.78009	2.70369	medium		2.70369			7.0956	5.21122	1.3616	medium		1.3616			5.06376	3.4566	1.46495	medium		1.46495			4.43416	2.32769	1.90496	medium		1.90496			25.5681	12.4704	2.05031	large			2.05031
	avg	stdev		6.74365	2.88859	2.33458	medium		2.33458			3.53255	6.10777	0.57837	small	0.57837				3.09378	1.8268	1.69355	small	1.69355				2.14016	3.46616	0.617445	small	0.617445				13.7766	7.51759	1.83258	medium		1.83258
small	1.59991	0.569044		9.92555	4.70254	2.11068	medium		2.11068			15.2239	9.02758	1.68638	medium		1.68638			11.5409	6.40075	1.80305	medium		1.80305			3.29571	2.74995	1.19846	small	1.19846				12.9105	6.6592	1.93874	medium		1.93874
medium	1.97677	0.598931		17.0556	5.52651	3.08614	large			3.08614		2.55685	5.81909	0.43939	small	0.43939				3.29168	1.91986	1.71454	small	1.71454				4.14185	3.86735	1.07098	medium		1.07098			3.30353	15.5554	0.212372	small	0.212372
larger	1.8283	0.512133		10.2695	3.60486	2.84879	medium		2.84879			6.08862	3.10642	1.96001	medium		1.96001			11.4899	8.33633	1.37829	medium		1.37829			20.205	3.93916	5.12927	large			5.12927		7.1723	4.2369	1.69282	medium		1.69282
				18.6425	7.15893	2.60409	large			2.60409		2.68713	1.1322	2.37337	small	2.37337				20.0678	17.1936	1.16717	large			1.16717		5.84014	5.72107	1.02081	medium		1.02081			5.96552	3.05068	1.95547	medium		1.95547
				7.67471	1.43489	5.34864	medium		5.34864			14.4834	9.11113	1.58964	medium		1.58964			4.92494	3.52731	1.39623	medium		1.39623			4.03929	1.32901	3.03932	medium		3.03932			2.74546	1.66456	1.64936	small	1.64936
				16.4554	6.59222	2.49618	large			2.49618		2.54537	2.18735	1.16368	small	1.16368				1.95222	1.14515	1.70477	small	1.70477				2.27007	1.69286	1.34097	small	1.34097				6.81615	4.20069	1.62263	medium		1.62263
				10.1421	2.9281	3.46372	medium		3.46372			5.5477	3.73781	1.48421	medium		1.48421			2.19629	1.28354	1.71112	small	1.71112				8.93841	4.14502	2.15642	medium		2.15642			12.1723	8.27908	1.47025	medium		1.47025
				60.7415	25.2923	2.40158	large			2.40158		11.1528	7.1309	1.56401	medium		1.56401			5.79725	3.69832	1.56754	medium		1.56754			4.54783	1.74553	2.60542	medium		2.60542			8.17715	5.76789	1.4177	medium		1.4177
				11.2619	4.77638	2.35784	medium		2.35784			2.41865	2.70317	0.894748	small	0.894748				4.84358	3.58773	1.35004	medium		1.35004			1.3735	4.74538	0.289439	small	0.289439				5.89039	3.15745	1.86555	medium		1.86555
				9.88888	2.7823	3.55421	medium		3.55421			3.21577	2.50155	1.28551	small	1.28551				2.83906	1.98694	1.42886	small	1.42886				2.61366	1.75701	1.48756	small	1.48756				3.82822	3.23741	1.18249	small	1.18249
				24.0791	10.2728	2.34397	large			2.34397		7.83925	4.47176	1.75306	medium		1.75306			6.13397	4.66762	1.31415	medium		1.31415			4.31279	3.93725	1.09538	medium		1.09538			7.00654	4.05347	1.72853	medium		1.72853
				31.7098	12.0181	2.63851	large			2.63851		16.046	10.7626	1.49089	large			1.49089		3.64487	1.08955	3.34529	small	3.34529				2.68546	2.74037	0.979961	small	0.979961				1.53868	1.79532	0.85705	small	0.85705
				8.99989	4.33477	2.07621	medium		2.07621			1.43504	2.7507	0.5217	small	0.5217				6.60048	3.1339	2.10615	medium		2.10615			14.1777	3.93437	3.60355	medium		3.60355			10.9079	7.67563	1.42111	medium		1.42111
				10.5366	2.86649	3.67579	medium		3.67579			5.26299	3.14544	1.67321	medium		1.67321			1.88023	1.34517	1.39776	small	1.39776				1.27179	1.63733	0.776745	small	0.776745				1.95923	1.76757	1.10843	small	1.10843
				6.69115	2.00631	3.33506	medium		3.33506			1.64293	1.23076	1.33489	small	1.33489				1.50315	1.08774	1.3819	small	1.3819				13.3691	17.2427	0.775351	medium		0.775351			5.0978	3.05633	1.66795	medium		1.66795
				1.29932	1.08969	1.19238	small	1.19238				7.58859	5.40784	1.40326	medium		1.40326			6.99434	4.6368	1.50844	medium		1.50844			4.50254	1.80298	2.49728	medium		2.49728			3.35958	2.11328	1.58975	small	1.58975
				6.32251	2.24193	2.82012	medium		2.82012			8.83356	3.74081	2.36141	medium		2.36141			4.57885	4.43496	1.03244	medium		1.03244			5.75724	4.48207	1.28451	medium		1.28451			16.7788	8.58716	1.95394	large			1.95394
				3.68372	1.51625	2.42949	small	2.42949				8.53063	6.17882	1.38063	medium		1.38063			6.05068	4.21137	1.43675	medium		1.43675			3.79399	1.49657	2.53512	small	2.53512				4.1633	2.57422	1.61731	medium		1.61731
				33.2936	13.1727	2.52748	large			2.52748		14.2874	8.81194	1.62137	medium		1.62137			1.68458	1.2793	1.3168	small	1.3168				3.92818	1.49753	2.62311	small	2.62311				2.97918	2.36256	1.261	small	1.261
				17.178	8.18748	2.09808	large			2.09808		11.8486	5.11866	2.31478	medium		2.31478			10.1876	6.08168	1.67512	medium		1.67512			3.89229	4.63239	0.840232	small	0.840232				4.07228	2.65042	1.53647	medium		1.53647
				69.7367	36.3172	1.92021	large			1.92021		5.73302	2.38898	2.39978	medium		2.39978			9.14898	5.85205	1.56338	medium		1.56338			4.93501	3.37232	1.46339	medium		1.46339			3.32977	2.79999	1.18921	small	1.18921
				12.374	4.87232	2.53966	medium		2.53966			11.0764	6.6331	1.66987	medium		1.66987			2.14399	1.30166	1.64711	small	1.64711				13.1854	13.9259	0.946824	medium		0.946824			4.69037	2.33575	2.00808	medium		2.00808
				25.0248	8.72362	2.86863	large			2.86863		8.8399	4.95756	1.78311	medium		1.78311			6.47554	2.42023	2.67559	medium		2.67559			2.86579	3.46807	0.826336	small	0.826336				7.67194	2.67393	2.86916	medium		2.86916
				6.35262	3.07342	2.06695	medium		2.06695			5.31209	3.10342	1.71169	medium		1.71169			2.64697	1.94101	1.3637	small	1.3637				3.76835	3.55137	1.0611	small	1.0611				39.1173	38.7549	1.00935	large			1.00935
				9.28245	3.33961	2.7795	medium		2.7795			21.1197	17.1916	1.22849	large			1.22849		2.75512	1.75066	1.57376	small	1.57376				1.07863	3.57723	0.301526	small	0.301526				3.68473	3.16027	1.16595	small	1.16595
				3.22629	1.82759	1.76533	small	1.76533				9.15035	4.89202	1.87046	medium		1.87046			16.5656	9.71534	1.7051	large			1.7051		2.60426	2.46078	1.05831	small	1.05831				12.8465	7.64176	1.68109	medium		1.68109
				15.4895	4.09021	3.78698	medium		3.78698			11.0926	8.94303	1.24037	medium		1.24037			7.07505	4.22165	1.6759	medium		1.6759			2.8128	1.47455	1.90756	small	1.90756				11.7808	8.02368	1.46825	medium		1.46825
				7.77662	1.87462	4.14837	medium		4.14837			1.91972	1.69004	1.1359	small	1.1359				3.71557	2.70304	1.37459	small	1.37459				12.029	4.34131	2.77082	medium		2.77082			5.04255	2.84749	1.77087	medium		1.77087
				13.4993	4.13254	3.26658	medium		3.26658			7.44802	6.03022	1.23511	medium		1.23511			10.7409	6.94704	1.54611	medium		1.54611			4.12476	1.915	2.15392	medium		2.15392			7.49228	2.45569	3.05098	medium		3.05098
				6.92353	1.73353	3.99389	medium		3.99389			6.99106	4.15206	1.68375	medium		1.68375			3.60871	1.45757	2.47584	small	2.47584				1.30854	1.17773	1.11107	small	1.11107				4.84659	2.24498	2.15886	medium		2.15886
				9.4689	3.38993	2.79324	medium		2.79324			16.5762	10.516	1.57628	large			1.57628		5.49895	3.71464	1.48035	medium		1.48035			6.55637	3.38285	1.93812	medium		1.93812			3.91209	1.72242	2.27128	small	2.27128
				3.56753	1.59761	2.23304	small	2.23304				8.36195	5.89914	1.41748	medium		1.41748			3.08281	1.28414	2.40068	small	2.40068				14.805	5.27679	2.80569	medium		2.80569			7.55468	4.97394	1.51885	medium		1.51885
				31.7677	12.8609	2.47011	large			2.47011		3.13222	3.20998	0.975774	small	0.975774				10.0623	5.93484	1.69546	medium		1.69546			1.35127	1.64403	0.821928	small	0.821928				4.86408	3.08643	1.57596	medium		1.57596
				5.5802	1.3333	4.18524	medium		4.18524			17.005	10.0622	1.68999	large			1.68999		3.65165	2.24135	1.62922	small	1.62922				2.17776	2.29322	0.949654	small	0.949654				1.8519	1.34426	1.37764	small	1.37764
				8.72814	3.22062	2.71008	medium		2.71008			15.6583	9.61544	1.62846	medium		1.62846			3.03987	1.83707	1.65473	small	1.65473				8.00508	2.18885	3.65721	medium		3.65721			4.17721	2.46087	1.69746	medium		1.69746
				8.37918	3.50375	2.39149	medium		2.39149			7.53712	4.23662	1.77904	medium		1.77904			1.54221	1.50833	1.02246	small	1.02246				5.25381	2.46844	2.12839	medium		2.12839			4.87322	2.88418	1.68964	medium		1.68964
				4.45228	1.77915	2.50247	medium		2.50247			1.20497	1.4564	0.827364	small	0.827364				1.77982	1.09801	1.62094	small	1.62094				48.8006	22.6976	2.15003	large			2.15003		13.9964	9.5495	1.46567	medium		1.46567
				70.9044	29.2993	2.42	large			2.42		8.63715	5.65099	1.52843	medium		1.52843			5.71493	3.39798	1.68186	medium		1.68186			16.6862	9.01105	1.85175	large			1.85175		6.75295	4.13202	1.6343	medium		1.6343
				7.84958	2.36656	3.31688	medium		3.31688			19.6058	12.8649	1.52397	large			1.52397		3.60516	1.76758	2.0396	small	2.0396				8.40166	3.98608	2.10775	medium		2.10775			30.5383	18.7561	1.62818	large			1.62818
				8.11283	3.53337	2.29606	medium		2.29606			33.3393	20.0679	1.66132	large			1.66132		4.82001	3.58471	1.3446	medium		1.3446			16.8734	7.02519	2.40184	large			2.40184		3.54004	1.74594	2.02759	small	2.02759
				4.98111	2.27344	2.191	medium		2.191			9.76848	8.34816	1.17014	medium		1.17014			9.21549	5.51425	1.67121	medium		1.67121			7.20423	3.65862	1.96911	medium		1.96911			2.78322	1.277	2.1795	small	2.1795
				14.4751	6.28041	2.3048	medium		2.3048			13.4107	7.14141	1.87788	medium		1.87788			5.74883	2.38759	2.40779	medium		2.40779			12.9469	9.37395	1.38116	medium		1.38116			4.78458	2.35551	2.03123	medium		2.03123
				5.65239	2.48789	2.27196	medium		2.27196			8.69021	5.59295	1.55378	medium		1.55378			7.85988	4.87066	1.61372	medium		1.61372			7.94012	3.58872	2.21252	medium		2.21252			2.05939	2.13115	0.966329	small	0.966329
				8.34329	3.77417	2.21063	medium		2.21063			12.2148	5.61397	2.1758	medium		2.1758			4.26989	1.79417	2.37987	medium		2.37987			2.98972	3.28614	0.909797	small	0.909797				7.22238	3.23036	2.23578	medium		2.23578
				25.3232	10.8795	2.32761	large			2.32761		15.5122	7.19595	2.15568	medium		2.15568			6.01355	2.86197	2.10119	medium		2.10119			22.7708	11.153	2.04168	large			2.04168		4.20067	2.86866	1.46433	medium		1.46433
				7.94492	1.932	4.11228	medium		4.11228			4.72644	3.22099	1.46739	medium		1.46739			2.66247	1.46906	1.81237	small	1.81237				2.02905	2.93187	0.692066	small	0.692066				32.5007	18.0186	1.80373	large			1.80373
				6.03763	1.96351	3.07492	medium		3.07492			1.30753	1.21675	1.07461	small	1.07461				1.45859	1.34094	1.08774	small	1.08774				13.0657	3.23444	4.03956	medium		4.03956			4.33462	1.67021	2.59526	medium		2.59526
				27.9566	9.95863	2.80727	large			2.80727		2.85542	1.35884	2.10137	small	2.10137				2.07135	1.18141	1.75329	small	1.75329				3.50425	1.86713	1.87681	small	1.87681				2.11464	2.04037	1.0364	small	1.0364
				7.87505	2.14787	3.66645	medium		3.66645			1.10162	1.49192	0.738392	small	0.738392				4.83131	2.55982	1.88736	medium		1.88736			4.59826	1.48126	3.1043	medium		3.1043			16.3237	12.7168	1.28363	large			1.28363
				24.7037	9.58192	2.57815	large			2.57815		4.61913	2.69316	1.71513	medium		1.71513			12.7816	8.8796	1.43943	medium		1.43943			8.49739	7.39	1.14985	medium		1.14985			4.4801	2.88747	1.55157	medium		1.55157
				7.19374	1.75469	4.09971	medium		4.09971			9.24301	7.72777	1.19608	medium		1.19608			12.0633	8.47049	1.42415	medium		1.42415			3.52391	3.0439	1.1577	small	1.1577				8.91728	5.89535	1.51259	medium		1.51259
				10.0031	3.32409	3.00929	medium		3.00929			6.11633	4.60434	1.32838	medium		1.32838			19.0137	13.9479	1.3632	large			1.3632		8.51106	3.81852	2.22889	medium		2.22889			5.9369	2.66265	2.2297	medium		2.2297
				17.6867	6.58093	2.68757	large			2.68757		11.3275	5.74705	1.971	medium		1.971			8.21759	4.66339	1.76215	medium		1.76215			26.9477	1.78191	15.1229	large			15.1229		6.68378	3.77596	1.77009	medium		1.77009
				16.2577	4.94992	3.28444	large			3.28444		2.45192	1.98623	1.23446	small	1.23446				1.32752	1.73737	0.7641	small	0.7641				7.12304	3.4336	2.07451	medium		2.07451			4.75874	2.24168	2.12284	medium		2.12284
				15.8439	6.96046	2.27627	medium		2.27627			7.75887	5.0186	1.54602	medium		1.54602			21.3327	13.6463	1.56325	large			1.56325		1.64614	1.88915	0.871367	small	0.871367				8.90933	4.71854	1.88815	medium		1.88815
				6.25882	2.81475	2.22357	medium		2.22357			11.3374	6.3119	1.79619	medium		1.79619			1.57385	2.19905	0.715695	small	0.715695				5.45894	2.74995	1.98511	medium		1.98511			17.4311	11.722	1.48704	large			1.48704
				9.02306	3.2131	2.80821	medium		2.80821			7.28052	3.93543	1.84999	medium		1.84999			20.2192	14.6803	1.3773	large			1.3773		4.92818	2.30183	2.14098	medium		2.14098			26.2474	19.0045	1.38112	large			1.38112
				7.45893	1.67192	4.46129	medium		4.46129			12.7581	10.2473	1.24502	medium		1.24502			1.76497	2.74413	0.64318	small	0.64318				19.8161	8.29197	2.3898	large			2.3898		14.787	7.37789	2.00423	medium		2.00423
				3.91031	1.6945	2.30765	small	2.30765				7.30111	4.96006	1.47198	medium		1.47198			51.9499	36.9856	1.4046	large			1.4046		6.40509	2.53259	2.52906	medium		2.52906			4.0369	5.04308	0.800483	medium		0.800483
				4.95756	1.94282	2.55174	medium		2.55174			2.14939	1.85815	1.15674	small	1.15674				2.7845	2.17307	1.28137	small	1.28137				14.2512	4.41121	3.23068	medium		3.23068			30.5502	18.893	1.61702	large			1.61702
				9.39401	3.57382	2.62856	medium		2.62856			5.33823	5.16569	1.0334	medium		1.0334			13.0586	8.24146	1.5845	medium		1.5845			36.7647	18.1475	2.02588	large			2.02588		3.92878	1.56485	2.51064	small	2.51064
				2.11998	1.3841	1.53167	small	1.53167				2.68832	1.19574	2.24825	small	2.24825				1.51509	1.04302	1.4526	small	1.4526				11.8119	3.33306	3.54386	medium		3.54386			4.16807	2.16831	1.92227	medium		1.92227
				5.09653	1.30226	3.91359	medium		3.91359			3.84696	2.45502	1.56698	small	1.56698				2.57369	1.55124	1.65911	small	1.65911				17.8683	10.6886	1.67171	large			1.67171		15.5124	10.5109	1.47584	medium		1.47584
				3.8196	1.42925	2.67246	small	2.67246				7.30032	3.62824	2.01208	medium		2.01208			4.38515	3.41551	1.28389	medium		1.28389			4.42134	1.02836	4.29942	medium		4.29942			7.52845	4.29899	1.75121	medium		1.75121
				5.87859	1.27546	4.60901	medium		4.60901			11.4898	4.73042	2.42892	medium		2.42892			10.0552	7.27457	1.38224	medium		1.38224			9.6931	6.15099	1.57586	medium		1.57586			4.99922	1.96653	2.54216	medium		2.54216
				8.00167	3.42144	2.33868	medium		2.33868			4.97234	2.63213	1.8891	medium		1.8891			1.07796	1.58871	0.678517	small	0.678517				6.30424	3.90182	1.61572	medium		1.61572			4.85334	2.83197	1.71377	medium		1.71377
				11.2646	3.93031	2.86609	medium		2.86609			5.5481	2.97734	1.86344	medium		1.86344			3.93285	2.67705	1.4691	small	1.4691				12.9452	5.16668	2.50552	medium		2.50552			5.64475	2.64665	2.13279	medium		2.13279
				9.82442	3.2352	3.03672	medium		3.03672			7.4702	4.57432	1.63307	medium		1.63307			7.85665	6.85942	1.14538	medium		1.14538			13.0307	6.78199	1.92137	medium		1.92137			1.97592	1.44209	1.37018	small	1.37018
				37.6525	4.5892	8.20458	large			8.20458		4.86345	3.09291	1.57245	medium		1.57245			2.66957	3.78051	0.706141	small	0.706141				10.9222	4.14502	2.635	medium		2.635			18.8474	10.8956	1.72981	large			1.72981
				7.90014	1.09157	7.23741	medium		7.23741			9.79896	7.01883	1.3961	medium		1.3961			2.90492	3.30311	0.879451	small	0.879451				6.23928	3.71319	1.6803	medium		1.6803			2.87544	2.25485	1.27522	small	1.27522
				4.8599	2.83169	1.71626	medium		1.71626			12.0355	7.06536	1.70345	medium		1.70345			5.0234	3.5684	1.40775	medium		1.40775			15.4666	8.5007	1.81945	medium		1.81945			20.2449	14.7487	1.37265	large			1.37265
				19.1474	6.86123	2.79067	large			2.79067		5.40515	4.18859	1.29045	medium		1.29045			1.55028	1.1808	1.3129	small	1.3129				9.96917	5.93651	1.6793	medium		1.6793			2.91837	1.37248	2.12635	small	2.12635
				8.33209	2.86131	2.91198	medium		2.91198			10.6345	8.32264	1.27778	medium		1.27778			4.85391	3.68926	1.31569	medium		1.31569			8.57943	5.27966	1.625	medium		1.625			4.02498	2.54835	1.57944	medium		1.57944
				3.99215	1.46405	2.72679	small	2.72679				7.06194	4.01698	1.75802	medium		1.75802			3.30266	3.63245	0.90921	small	0.90921				4.99741	5.97098	0.83695	medium		0.83695			7.76496	3.9133	1.98425	medium		1.98425
				7.14279	1.48991	4.79409	medium		4.79409			1.85121	3.53268	0.524025	small	0.524025				5.40791	5.33356	1.01394	medium		1.01394			38.8186	26.991	1.4382	large			1.4382		6.48703	3.71811	1.74471	medium		1.74471
				7.70829	4.05729	1.89986	medium		1.89986			9.6679	5.91665	1.63401	medium		1.63401			15.4502	10.7825	1.43289	medium		1.43289			8.70508	3.90469	2.22939	medium		2.22939			6.86146	3.80559	1.80299	medium		1.80299
				20.7281	9.66093	2.14556	large			2.14556		9.93558	5.15618	1.92692	medium		1.92692			5.69588	4.20775	1.35366	medium		1.35366			5.18715	3.88554	1.33499	medium		1.33499			4.07943	2.51025	1.62511	medium		1.62511
				7.4682	1.37563	5.42892	medium		5.42892			1.5673	1.55996	1.0047	small	1.0047				10.082	7.40752	1.36105	medium		1.36105			8.42986	3.90756	2.15732	medium		2.15732			4.37318	1.78309	2.45258	medium		2.45258
				9.69433	2.57537	3.76425	medium		3.76425			2.30937	1.7771	1.29952	small	1.29952				3.45052	2.95684	1.16696	small	1.16696				30.5314	18.3639	1.66258	large			1.66258		9.24242	4.24584	2.17682	medium		2.17682
				6.48039	2.93515	2.20785	medium		2.20785			8.80941	3.59672	2.44929	medium		2.44929			2.96303	2.44379	1.21247	small	1.21247				5.77603	1.94564	2.9687	medium		2.9687			3.71374	1.14436	3.24526	small	3.24526
				17.0568	5.48889	3.10751	large			3.10751		4.9565	3.68127	1.34641	medium		1.34641			10.2102	5.29609	1.92787	medium		1.92787			5.76834	2.38992	2.41361	medium		2.41361			8.74079	4.63388	1.88628	medium		1.88628
				23.8344	8.8459	2.6944	large			2.6944		4.12652	2.48954	1.65755	medium		1.65755			1.92897	1.64672	1.1714	small	1.1714				6.72133	3.36849	1.99535	medium		1.99535			6.85311	1.49571	4.58185	medium		4.58185
				9.61597	2.23675	4.29907	medium		4.29907			5.40713	2.72468	1.9845	medium		1.9845			1.3498	1.24244	1.08641	small	1.08641				3.33502	2.21662	1.50455	small	1.50455				8.05989	5.49462	1.46687	medium		1.46687
				31.0567	10.9637	2.83269	large			2.83269		8.59518	2.9248	2.93872	medium		2.93872			6.05875	1.7706	3.42186	medium		3.42186			8.12474	3.73713	2.17406	medium		2.17406			5.4309	2.88747	1.88085	medium		1.88085
				2.5971	1.48709	1.74643	small	1.74643				7.62463	5.41885	1.40706	medium		1.40706			2.43325	1.14878	2.11812	small	2.11812				1.88375	1.38838	1.3568	small	1.3568				10.0469	5.9993	1.67468	medium		1.67468
				46.7566	17.712	2.63982	large			2.63982		2.1878	1.07416	2.03675	small	2.03675				30.8129	25.9614	1.18687	large			1.18687		11.4709	6.20461	1.84876	medium		1.84876			9.83786	5.35257	1.83797	medium		1.83797
				31.3863	11.9668	2.62278	large			2.62278		5.13945	4.10003	1.25351	medium		1.25351			6.32994	1.85762	3.40755	medium		3.40755			24.4366	16.6557	1.46716	large			1.46716		7.36707	4.52146	1.62935	medium		1.62935
				8.68143	2.36797	3.66619	medium		3.66619			9.98072	6.16881	1.61793	medium		1.61793			1.53446	1.86971	0.820697	small	0.820697				5.52048	1.96384	2.81107	medium		2.81107			2.62621	1.4642	1.79362	small	1.79362
				16.5874	6.56776	2.52557	large			2.52557		8.74169	5.74705	1.52108	medium		1.52108			17.0476	13.0753	1.30381	large			1.30381		8.93841	5.06518	1.76468	medium		1.76468			6.02594	4.67386	1.28929	medium		1.28929
				13.4637	2.88483	4.66709	medium		4.66709			6.2185	2.7522	2.25947	medium		2.25947			1.28039	2.7121	0.472101	small	0.472101				5.35809	1.84032	2.9115	medium		2.9115			1.49893	1.66786	0.898716	small	0.898716
				9.50094	3.7991	2.50084	medium		2.50084			4.42114	2.69216	1.64223	medium		1.64223			7.03373	4.17935	1.68297	medium		1.68297			2.09828	2.36886	0.885777	small	0.885777				10.9302	8.58904	1.27257	medium		1.27257
				5.27178	1.83276	2.87641	medium		2.87641			2.94373	1.89917	1.55001	small	1.55001				2.13107	1.13065	1.88482	small	1.88482				38.163	20.4542	1.86578	large			1.86578		4.94914	1.44773	3.41854	medium		3.41854
				9.94022	3.11387	3.19224	medium		3.19224			17.2628	10.7531	1.60538	large			1.60538		2.9343	2.1779	1.34731	small	1.34731				2.78802	5.20498	0.535645	small	0.535645				1.90795	3.27034	0.58341	small	0.58341
				7.18254	2.90176	2.47524	medium		2.47524			9.33963	6.55155	1.42556	medium		1.42556			16.6983	10.8841	1.5342	large			1.5342		5.91108	2.88974	2.04554	medium		2.04554			3.57502	2.13632	1.67344	small	1.67344
				9.62292	3.56065	2.70257	medium		2.70257			9.56929	6.10477	1.56751	medium		1.56751			5.31299	1.7422	3.04959	medium		3.04959			4.241	2.15629	1.9668	medium		1.9668			4.78816	1.4482	3.30627	medium		3.30627
				4.57387	1.59197	2.87309	medium		2.87309			8.29107	3.48315	2.38033	medium		2.38033			8.15496	5.62967	1.44857	medium		1.44857			28.8135	14.8863	1.93558	large			1.93558		11.6695	5.69593	2.04874	medium		2.04874
				12.7608	4.57462	2.78948	medium		2.78948			13.992	9.45534	1.4798	medium		1.4798			5.11767	4.13825	1.23667	medium		1.23667			6.09142	5.2452	1.16133	medium		1.16133			32.8382	17.8977	1.83477	large			1.83477
				25.9702	8.33045	3.1175	large			3.1175		5.065	2.48754	2.03615	medium		2.03615			7.16448	5.17825	1.38357	medium		1.38357			13.6905	5.67703	2.41156	medium		2.41156			7.47518	5.15315	1.45061	medium		1.45061
				28.5928	11.0808	2.58039	large			2.58039		4.64962	2.46402	1.887	medium		1.887			6.51751	3.48319	1.87113	medium		1.87113			2.77947	2.08257	1.33464	small	1.33464				3.35839	2.15467	1.55866	small	1.55866
				14.3801	6.61338	2.1744	medium		2.1744			4.84642	2.87728	1.68438	medium		1.68438			2.86263	2.82329	1.01393	small	1.01393				5.01877	1.15283	4.35342	medium		4.35342			6.13088	3.54643	1.72874	medium		1.72874
				8.64939	2.23346	3.87264	medium		3.87264			3.70481	4.15807	0.890992	small	0.890992				5.48539	3.57625	1.53384	medium		1.53384			3.37434	1.89681	1.77895	small	1.77895				3.94826	1.37201	2.87772	small	2.87772
				2.66272	2.28143	1.16713	small	1.16713				8.57182	6.00821	1.42668	medium		1.42668			2.75189	1.59173	1.72887	small	1.72887				2.81707	2.70877	1.03998	small	1.03998				7.29075	3.88367	1.87728	medium		1.87728
				8.80998	3.61521	2.43692	medium		2.43692			22.788	13.9486	1.63371	large			1.63371		8.35964	5.68587	1.47025	medium		1.47025			6.56577	4.32025	1.51977	medium		1.51977			11.6154	6.96728	1.66714	medium		1.66714
				61.6548	24.482	2.51837	large			2.51837		17.7697	8.18856	2.17006	large			2.17006		15.4014	10.6581	1.44505	medium		1.44505			12.6333	6.6058	1.91245	medium		1.91245			5.60738	5.53177	1.01367	medium		1.01367
				9.49322	3.44261	2.75757	medium		2.75757			7.46069	5.93066	1.25799	medium		1.25799			6.34608	5.10393	1.24337	medium		1.24337			3.71194	1.9083	1.94516	small	1.94516				8.30474	2.22898	3.7258	medium		3.7258
				30.6074	10.6349	2.878	large			2.878		1.43306	1.92769	0.743406	small	0.743406				1.63713	8.69166	0.188356	small	0.188356				4.46749	1.69957	2.6286	medium		2.6286			4.1315	2.69933	1.53056	medium		1.53056
				2.20954	1.26981	1.74005	small	1.74005				4.19305	3.18096	1.31817	medium		1.31817			4.15787	3.27894	1.26805	medium		1.26805			18.2452	11.1961	1.62961	large			1.62961		5.73378	2.29248	2.50113	medium		2.50113
				17.215	7.55963	2.27723	large			2.27723		4.28888	1.68504	2.54527	medium		2.54527			4.7577	4.89725	0.971505	medium		0.971505			3.37007	1.78287	1.89025	small	1.89025				26.6234	21.153	1.25861	large			1.25861
				20.744	6.18258	3.35522	large			3.35522		5.1042	1.68654	3.02643	medium		3.02643			1.82244	1.38868	1.31235	small	1.31235				8.96404	1.05134	8.52633	medium		8.52633			2.52485	2.65747	0.950095	small	0.950095
				11.2392	5.52181	2.03541	medium		2.03541			6.87939	4.32667	1.59	medium		1.59			4.58014	3.90439	1.17308	medium		1.17308			11.0922	5.85034	1.896	medium		1.896			8.54801	5.68699	1.50308	medium		1.50308
				5.7929	1.63618	3.54051	medium		3.54051			1.21646	2.37397	0.512416	small	0.512416				2.34867	2.0371	1.15295	small	1.15295				25.1691	13.2509	1.89943	large			1.89943		3.01416	1.87622	1.60651	small	1.60651
				6.69385	2.33693	2.86438	medium		2.86438			1.8623	2.12831	0.875012	small	0.875012				4.18337	1.90476	2.19628	medium		2.19628			15.6161	14.4228	1.08274	medium		1.08274			4.4642	1.79156	2.4918	medium		2.4918
				38.7295	19.2231	2.01474	large			2.01474		3.17419	1.41337	2.24582	small	2.24582				3.41243	1.91382	1.78304	small	1.78304				4.23587	2.57568	1.64456	medium		1.64456			4.67964	2.27649	2.05564	medium		2.05564
				57.1975	20.3537	2.81018	large			2.81018		9.49841	6.09176	1.55922	medium		1.55922			7.14124	5.84842	1.22105	medium		1.22105			25.5186	13.7966	1.84963	large			1.84963		8.05671	4.75147	1.69563	medium		1.69563
				12.1274	4.45564	2.7218	medium		2.7218			1.93081	1.58448	1.21857	small	1.21857				4.51719	2.51389	1.79689	medium		1.79689			23.3084	12.5232	1.86122	large			1.86122		5.51516	2.52342	2.18559	medium		2.18559
				7.43075	2.48178	2.99412	medium		2.99412			5.16004	3.51717	1.4671	medium		1.4671			13.4838	8.07467	1.66988	medium		1.66988			23.6204	9.92834	2.37909	large			2.37909		9.33742	4.632	2.01585	medium		2.01585
				6.10788	1.70672	3.57872	medium		3.57872			2.779	2.32293	1.19633	small	1.19633				2.02518	1.38989	1.45708	small	1.45708				25.5674	11.8117	2.16457	large			2.16457		3.81391	2.5935	1.47056	small	1.47056
				18.4449	6.98068	2.64227	large			2.64227		11.6672	7.56817	1.54161	medium		1.54161			6.01452	4.10622	1.46473	medium		1.46473			27.9511	13.2892	2.1033	large			2.1033		4.31316	2.76565	1.55954	medium		1.55954
				7.13545	2.72587	2.61768	medium		2.61768			5.81618	3.14594	1.84879	medium		1.84879			8.42776	4.61384	1.82663	medium		1.82663			19.4007	8.9469	2.16843	large			2.16843		5.17213	3.02811	1.70804	medium		1.70804
				54.1391	16.6529	3.25103	large			3.25103		7.63849	5.59996	1.36403	medium		1.36403			40.6318	26.4098	1.53851	large			1.53851		17.7965	10.6062	1.67792	large			1.67792		2.72837	1.26759	2.1524	small	2.1524
				7.09723	2.52458	2.81126	medium		2.81126			5.02382	3.79484	1.32385	medium		1.32385			5.78014	3.53939	1.63309	medium		1.63309			4.70254	1.2639	3.72065	medium		3.72065			26.6449	13.6613	1.9504	large			1.9504
				13.0615	4.23459	3.08448	medium		3.08448			7.31457	3.87389	1.88817	medium		1.88817			6.41065	3.81797	1.67907	medium		1.67907			6.94269	3.79171	1.83102	medium		1.83102			2.16234	1.16458	1.85675	small	1.85675
				12.8071	5.42069	2.36264	medium		2.36264			5.08203	4.854	1.04698	medium		1.04698			2.55561	1.73434	1.47353	small	1.47353				15.1666	7.39957	2.04965	medium		2.04965			6.16267	3.76844	1.63534	medium		1.63534
				13.9609	4.47727	3.11818	medium		3.11818			5.76589	3.68728	1.56373	medium		1.56373			8.1598	5.96203	1.36863	medium		1.36863			9.27089	2.9807	3.1103	medium		3.1103			3.1815	3.85686	0.824894	small	0.824894
				6.83166	3.39464	2.01249	medium		2.01249			15.791	10.8607	1.45395	medium		1.45395			3.03277	1.38627	2.18772	small	2.18772				5.17946	2.0098	2.57711	medium		2.57711			11.2935	7.7142	1.46398	medium		1.46398
				11.3681	4.52242	2.51372	medium		2.51372			7.45554	4.84449	1.53897	medium		1.53897			14.0662	9.04397	1.55531	medium		1.55531			8.89909	5.55351	1.60243	medium		1.60243			2.51969	2.42136	1.04061	small	1.04061
				5.91565	3.17595	1.86264	medium		1.86264			13.1494	10.3139	1.27492	medium		1.27492			7.89959	5.13233	1.53918	medium		1.53918			6.35551	3.51212	1.8096	medium		1.8096			1.0931	1.95853	0.55812	small	0.55812
				7.18988	2.81146	2.55735	medium		2.55735			7.89667	2.76371	2.85728	medium		2.85728			7.1958	4.9311	1.45927	medium		1.45927			5.89056	5.25094	1.12181	medium		1.12181			3.60682	1.84988	1.94976	small	1.94976
				5.37909	1.94987	2.75869	medium		2.75869			3.43989	2.45352	1.40203	small	1.40203				6.7054	3.59801	1.86364	medium		1.86364			4.87177	2.29609	2.12177	medium		2.12177			14.0966	8.1107	1.73802	medium		1.73802
				6.30166	3.53338	1.78347	medium		1.78347			1.63818	1.55196	1.05556	small	1.05556				3.03212	2.68672	1.12856	small	1.12856				9.1743	3.18178	2.88339	medium		2.88339			11.5367	5.64278	2.04451	medium		2.04451
				34.8574	9.12996	3.81791	large			3.81791		7.43654	4.24462	1.75199	medium		1.75199			4.9753	3.60647	1.37955	medium		1.37955			2.23588	1.21794	1.83579	small	1.83579				22.5782	12.1265	1.86188	large			1.86188
				5.58136	2.40371	2.32198	medium		2.32198			7.07619	4.78145	1.47993	medium		1.47993			8.53042	4.63438	1.84068	medium		1.84068			5.48458	2.05863	2.66419	medium		2.66419			20.8026	10.0598	2.06789	large			2.06789
				2.45504	2.12905	1.15311	small	1.15311				2.56081	2.56058	1.00009	small	1.00009				3.36497	2.36342	1.42377	small	1.42377				15.6358	7.37467	2.1202	medium		2.1202			10.0601	6.48894	1.55034	medium		1.55034
				10.4934	4.12031	2.54674	medium		2.54674			4.60527	2.7597	1.66875	medium		1.66875			5.80661	4.38722	1.32353	medium		1.32353			2.48289	1.47072	1.68821	small	1.68821				5.25084	3.55161	1.47844	medium		1.47844
				18.0187	5.81057	3.10102	large			3.10102		1.61917	2.1078	0.768179	small	0.768179				6.22824	4.2005	1.48274	medium		1.48274			2.60169	2.46078	1.05726	small	1.05726				1.97036	1.56344	1.26027	small	1.26027
				7.3161	2.58525	2.82994	medium		2.82994			4.03981	2.79523	1.44525	medium		1.44525			14.7419	8.81554	1.67226	medium		1.67226			23.9828	14.5971	1.64298	large			1.64298		15.7481	9.53633	1.65138	medium		1.65138
				10.5513	4.53794	2.32513	medium		2.32513			4.52132	3.00636	1.50392	medium		1.50392			3.94189	1.56031	2.52635	small	2.52635				5.21279	3.97651	1.3109	medium		1.3109			6.36301	4.49136	1.41672	medium		1.41672
				12.7558	4.58403	2.78266	medium		2.78266			8.31759	4.70441	1.76804	medium		1.76804			1.73333	1.321	1.31213	small	1.31213				6.05894	2.18789	2.76931	medium		2.76931			5.7473	4.41093	1.30297	medium		1.30297
				2.82639	1.81913	1.55371	small	1.55371				14.3638	7.59169	1.89205	medium		1.89205			12.6628	7.24315	1.74824	medium		1.74824			3.7957	1.37114	2.76828	small	2.76828				2.9279	1.05593	2.77281	small	2.77281
				7.21535	1.62536	4.43923	medium		4.43923			1.89438	1.69655	1.11661	small	1.11661				9.3004	5.55655	1.67377	medium		1.67377			4.39485	3.33977	1.31591	medium		1.31591			5.89079	4.10332	1.43561	medium		1.43561
				18.1422	6.40598	2.83208	large			2.83208		10.8879	5.10215	2.13398	medium		2.13398			15.2956	9.19867	1.6628	medium		1.6628			9.35379	3.04486	3.072	medium		3.072			13.1132	6.05621	2.16524	medium		2.16524
				9.45114	1.77868	5.31357	medium		5.31357			1.91774	2.00524	0.956365	small	0.956365				4.77869	1.48295	3.22241	medium		3.22241			7.31619	2.83803	2.57791	medium		2.57791			9.11483	7.45456	1.22272	medium		1.22272
				11.4353	4.67244	2.44738	medium		2.44738			6.23275	3.31755	1.87872	medium		1.87872			3.9548	1.74583	2.26529	small	2.26529				7.13671	5.27679	1.35247	medium		1.35247			9.72299	4.9255	1.97401	medium		1.97401
				33.9703	13.2446	2.56484	large			2.56484		6.1785	3.83637	1.61051	medium		1.61051			3.77917	2.332	1.62057	small	1.62057				7.01021	3.6883	1.90066	medium		1.90066			4.95311	3.06574	1.61564	medium		1.61564
				15.7729	8.57265	1.83991	medium		1.83991			1.98981	2.88228	0.690359	small	0.690359				5.85149	4.03431	1.45043	medium		1.45043			31.3024	14.5732	2.14794	large			2.14794		2.18937	1.40634	1.55678	small	1.55678
				39.1367	13.2714	2.94894	large			2.94894		2.77464	1.90468	1.45675	small	1.45675				7.69878	3.55027	2.16851	medium		2.16851			3.5222	2.08161	1.69206	small	1.69206				4.77027	2.32776	2.0493	medium		2.0493
				34.6431	13.3166	2.6015	large			2.6015		11.8941	7.27199	1.63561	medium		1.63561			2.03131	1.91503	1.06072	small	1.06072				9.84182	6.85858	1.43496	medium		1.43496			9.88993	5.24627	1.88513	medium		1.88513
				2.47666	1.04595	2.36785	small	2.36785				8.15524	4.8605	1.67786	medium		1.67786			24.9943	16.3197	1.53154	large			1.53154		7.9914	4.14311	1.92884	medium		1.92884			5.06163	2.82539	1.79148	medium		1.79148
				15.7941	5.71275	2.76471	medium		2.76471			2.74534	2.09479	1.31055	small	1.31055				24.317	1.6153	15.0542	large			15.0542		4.88886	2.16874	2.25424	medium		2.25424			4.42048	2.48297	1.78032	medium		1.78032
				10.4532	2.84626	3.67261	medium		3.67261			13.619	9.52038	1.43051	medium		1.43051			3.43212	3.09221	1.10993	small	1.10993				2.10853	1.43625	1.46808	small	1.46808				10.2071	6.23165	1.63795	medium		1.63795
				4.15002	1.28392	3.2323	medium		3.2323			4.29165	3.239	1.32499	medium		1.32499			4.04035	1.61046	2.50882	medium		2.50882			15.0136	6.51006	2.30621	medium		2.30621			13.8919	5.46545	2.54176	medium		2.54176
				13.6124	5.28101	2.5776	medium		2.5776			4.03743	2.85626	1.41354	medium		1.41354			4.35351	2.28365	1.90638	medium		1.90638			6.00851	3.79362	1.58384	medium		1.58384			3.89301	3.18097	1.22384	small	1.22384
				10.3085	3.40357	3.02872	medium		3.02872			32.8586	18.9027	1.7383	large			1.7383		13.1571	8.72188	1.50851	medium		1.50851			3.79912	3.56095	1.06689	small	1.06689				2.92473	2.12269	1.37784	small	1.37784
				3.43398	1.59714	2.15007	small	2.15007				5.41861	4.78796	1.13172	medium		1.13172			3.74302	1.7277	2.16648	small	2.16648				7.36833	5.02688	1.46579	medium		1.46579			2.74983	2.02297	1.3593	small	1.3593
				9.84333	3.52115	2.79549	medium		2.79549			6.66913	4.82798	1.38135	medium		1.38135			31.5774	21.2357	1.48699	large			1.48699		10.5367	7.63607	1.37986	medium		1.37986			17.2276	11.2253	1.5347	large			1.5347
				2.02039	1.33707	1.51106	small	1.51106				1.6651	1.57547	1.05689	small	1.05689				4.96497	2.99975	1.65513	medium		1.65513			2.71793	1.6718	1.62575	small	1.62575				3.51381	2.29624	1.53024	small	1.53024
				10.3996	2.91493	3.56769	medium		3.56769			12.0347	7.04435	1.70842	medium		1.70842			13.6465	8.40824	1.62299	medium		1.62299			2.92306	1.85947	1.57199	small	1.57199				6.66152	3.13723	2.12338	medium		2.12338
				14.0015	1.89814	7.37643	medium		7.37643			2.98768	4.22811	0.706624	small	0.706624				8.82065	6.47206	1.36288	medium		1.36288			4.41792	2.50865	1.76107	medium		1.76107			2.33923	1.64152	1.42504	small	1.42504
				17.3528	6.61526	2.62315	large			2.62315		8.78208	7.64072	1.14938	medium		1.14938			4.70734	3.9195	1.20101	medium		1.20101			3.87263	1.58179	2.44825	small	2.44825				15.1702	8.23816	1.84145	medium		1.84145
				32.4027	14.4274	2.24591	large			2.24591		3.49652	3.18697	1.09713	small	1.09713				4.20371	2.87285	1.46326	medium		1.46326			23.5964	14.0619	1.67804	large			1.67804		2.97282	1.76851	1.68097	small	1.68097
				11.1179	3.79957	2.92611	medium		2.92611			4.23898	3.46714	1.22262	medium		1.22262			12.1046	6.62193	1.82796	medium		1.82796			41.6425	22.5023	1.85059	large			1.85059		6.01163	4.60613	1.30514	medium		1.30514
				24.379	8.59006	2.83805	large			2.83805		17.6655	10.5995	1.66663	large			1.66663		13.6771	9.60899	1.42337	medium		1.42337			13.0683	6.54165	1.99771	medium		1.99771			2.74546	1.63964	1.67443	small	1.67443
				43.284	19.1939	2.25509	large			2.25509		1.67065	1.19023	1.40363	small	1.40363				6.82744	4.85918	1.40506	medium		1.40506			6.87432	4.58835	1.49821	medium		1.49821			2.44933	3.23929	0.75613	small	0.75613
				42.3503	16.0584	2.63726	large			2.63726		9.16698	4.28014	2.14174	medium		2.14174			20.6134	11.6002	1.77699	large			1.77699		3.46323	1.18347	2.92633	small	2.92633				5.23215	2.84232	1.8408	medium		1.8408
				110.592	53.3359	2.0735	large			2.0735		16.9247	10.7822	1.56969	large			1.56969		8.86101	4.77519	1.85564	medium		1.85564			18.5486	9.60949	1.93024	large			1.93024		2.63814	2.90111	0.909353	small	0.909353
				20.3398	8.22698	2.47233	large			2.47233		12.8215	9.09712	1.4094	medium		1.4094			13.9822	11.2364	1.24437	medium		1.24437			8.04952	4.65633	1.72873	medium		1.72873			9.24163	5.50732	1.67806	medium		1.67806
				6.42866	1.44665	4.44383	medium		4.44383			11.3591	9.37979	1.21102	medium		1.21102			9.08119	5.68708	1.59681	medium		1.59681			4.60852	3.06209	1.50502	medium		1.50502			6.6973	3.14946	2.12649	medium		2.12649
				21.6441	8.42827	2.56804	large			2.56804		4.62427	5.26775	0.877846	medium		0.877846			1.56771	1.02489	1.52964	small	1.52964				8.2367	4.32982	1.90232	medium		1.90232			5.7314	3.64615	1.57191	medium		1.57191
				14.733	5.25562	2.80328	medium		2.80328			19.2431	10.3494	1.85935	large			1.85935		8.73252	6.25028	1.39714	medium		1.39714			2.56323	2.38035	1.07683	small	1.07683				1.96201	1.67303	1.17273	small	1.17273
				8.80303	2.42393	3.63171	medium		3.63171			3.51315	2.49904	1.4058	small	1.4058				3.74398	1.55728	2.40418	small	2.40418				1.63418	1.11932	1.45998	small	1.45998				5.29217	3.05868	1.73021	medium		1.73021
				38.6577	14.4731	2.67101	large			2.67101		2.10148	1.17723	1.78511	small	1.78511				2.33704	1.78752	1.30742	small	1.30742				8.09568	3.67585	2.2024	medium		2.2024			10.1328	5.38456	1.88183	medium		1.88183
				14.4099	3.21639	4.48013	medium		4.48013			10.0967	5.04562	2.00109	medium		2.00109			11.1596	7.52355	1.48329	medium		1.48329			23.9734	11.4431	2.09501	large			2.09501		16.4187	10.954	1.49888	large			1.49888
				5.52809	3.29117	1.67967	medium		1.67967			12.9308	8.22158	1.57279	medium		1.57279			7.69426	4.54495	1.69293	medium		1.69293			4.98373	2.84378	1.7525	medium		1.7525			5.51993	3.17486	1.73864	medium		1.73864
				7.606	1.73776	4.37689	medium		4.37689			4.79178	4.37921	1.09421	medium		1.09421			6.04358	3.27471	1.84553	medium		1.84553			31.6742	11.8098	2.68202	large			2.68202		5.39433	1.87575	2.87582	medium		2.87582
				3.47914	1.27405	2.73078	small	2.73078				3.60185	1.17973	3.05312	small	3.05312				3.30395	1.90657	1.73293	small	1.73293				8.20166	3.19135	2.56996	medium		2.56996			8.26023	4.78439	1.72649	medium		1.72649
				19.7631	6.88192	2.87174	large			2.87174		10.1957	5.80208	1.75725	medium		1.75725			6.08426	3.87055	1.57194	medium		1.57194			2.99827	1.21315	2.47147	small	2.47147				2.99826	1.48489	2.01918	small	2.01918
				15.4096	3.64107	4.23217	medium		4.23217			1.35742	2.37947	0.570474	small	0.570474				3.74108	2.35013	1.59186	small	1.59186				5.1333	3.72851	1.37677	medium		1.37677			2.8015	1.0263	2.72971	small	2.72971
				8.08852	2.81617	2.87217	medium		2.87217			4.90581	2.40649	2.03858	medium		2.03858			14.1194	9.69419	1.45648	medium		1.45648			10.4299	6.03801	1.72737	medium		1.72737			2.09676	2.04131	1.02716	small	1.02716
				52.1179	25.5115	2.04292	large			2.04292		23.0184	14.1522	1.62649	large			1.62649		17.5658	13.4662	1.30443	large			1.30443		33.5571	19.3119	1.73764	large			1.73764		2.05422	1.15894	1.7725	small	1.7725
				8.23289	3.17971	2.58919	medium		2.58919			5.00877	3.33056	1.50388	medium		1.50388			2.26699	1.59415	1.42207	small	1.42207				2.06836	1.01591	2.03597	small	2.03597				4.40657	2.45898	1.79203	medium		1.79203
				11.0643	3.56159	3.10656	medium		3.10656			19.3801	10.6591	1.81818	large			1.81818		8.02711	4.22708	1.89897	medium		1.89897			35.087	21.8856	1.6032	large			1.6032		5.70278	4.17153	1.36707	medium		1.36707
				17.1143	6.55224	2.61197	large			2.61197		8.99235	5.89514	1.52538	medium		1.52538			2.73801	2.25767	1.21276	small	1.21276				4.37348	2.83995	1.53999	medium		1.53999			4.86368	2.70874	1.79555	medium		1.79555
				78.8397	30.746	2.56423	large			2.56423		8.79832	6.04423	1.45566	medium		1.45566			16.522	10.1655	1.6253	large			1.6253		6.91278	3.75245	1.8422	medium		1.8422			2.89333	2.26849	1.27544	small	1.27544
				13.9988	2.90553	4.81798	medium		4.81798			10.7157	14.7876	0.724637	medium		0.724637			14.9298	10.2719	1.45346	medium		1.45346			3.47177	2.53738	1.36825	small	1.36825				1.66429	1.0898	1.52715	small	1.52715
				6.97332	2.56361	2.72011	medium		2.72011			4.78979	1.48992	3.21479	medium		3.21479			14.2237	9.16603	1.55179	medium		1.55179			43.7698	29.1435	1.50187	large			1.50187		7.09399	5.06566	1.40041	medium		1.40041
				4.49358	3.37629	1.33092	medium		1.33092			4.76287	3.18447	1.49566	medium		1.49566			17.6684	10.5239	1.67889	large			1.67889		21.4067	11.8816	1.80166	large			1.80166		3.19104	2.03943	1.56467	small	1.56467
				6.8166	2.69436	2.52996	medium		2.52996			12.4425	7.67374	1.62144	medium		1.62144			8.97304	6.35724	1.41147	medium		1.41147			8.35892	6.88348	1.21435	medium		1.21435			2.68822	2.086	1.2887	small	1.2887
				8.29465	3.27518	2.53258	medium		2.53258			6.75387	3.84888	1.75476	medium		1.75476			11.2949	5.58374	2.02282	medium		2.02282			3.25895	2.55174	1.27715	small	1.27715				6.98905	3.44954	2.02608	medium		2.02608
				3.77752	3.02357	1.24936	small	1.24936				5.10619	3.28403	1.55486	medium		1.55486			4.1004	2.24075	1.82992	medium		1.82992			5.07347	3.56477	1.42322	medium		1.42322			8.26062	6.38828	1.29309	medium		1.29309
				68.3008	28.4057	2.40447	large			2.40447		5.55483	2.92881	1.89662	medium		1.89662			5.36303	3.8071	1.40869	medium		1.40869			9.54866	1.46785	6.50522	medium		6.50522			2.0745	1.51123	1.37272	small	1.37272
				10.554	3.59263	2.93767	medium		2.93767			10.2508	9.33777	1.09778	medium		1.09778			3.39758	2.34227	1.45055	small	1.45055				9.73499	4.6209	2.10673	medium		2.10673			4.80008	2.53424	1.89409	medium		1.89409
				6.44719	3.03391	2.12504	medium		2.12504			12.5732	10.0737	1.24812	medium		1.24812			6.58627	4.02464	1.63649	medium		1.63649			6.16577	4.82868	1.27691	medium		1.27691			4.66613	2.33434	1.99891	medium		1.99891
				98.5595	46.1422	2.13599	large			2.13599		14.7729	3.27402	4.51215	medium		4.51215			8.30766	5.98137	1.38892	medium		1.38892			4.64014	1.63829	2.83232	medium		2.83232			3.86002	1.42045	2.71746	small	2.71746
				8.5112	3.27048	2.60244	medium		2.60244			3.35436	2.1023	1.59557	small	1.59557				14.8997	9.70447	1.53535	medium		1.53535			19.2059	9.65449	1.98932	large			1.98932		2.8655	1.77933	1.61044	small	1.61044
				21.1624	9.17417	2.30674	large			2.30674		9.38596	3.74982	2.50304	medium		2.50304			5.94318	3.75392	1.58319	medium		1.58319			15.8238	8.51315	1.85875	medium		1.85875			2.42707	1.12696	2.15365	small	2.15365
				6.24183	2.74421	2.27455	medium		2.27455			8.39798	3.21148	2.61499	medium		2.61499			16.1327	9.74133	1.65611	large			1.65611		11.7572	5.47499	2.14743	medium		2.14743			3.03563	1.19092	2.54897	small	2.54897
				19.1875	6.83019	2.80923	large			2.80923		1.42791	1.96321	0.727334	small	0.727334				37.9903	24.9262	1.52411	large			1.52411		4.95724	4.13162	1.19983	medium		1.19983			5.71073	2.21346	2.58	medium		2.58
				9.12844	3.35983	2.71693	medium		2.71693			19.1651	16.2475	1.17957	large			1.17957		7.15028	4.55462	1.5699	medium		1.5699			11.8093	4.83251	2.44373	medium		2.44373			2.08483	1.34567	1.54929	small	1.54929
				5.18609	1.9146	2.70871	medium		2.70871			8.45777	6.481	1.30501	medium		1.30501			4.25439	2.92059	1.45669	medium		1.45669			58.2595	36.8878	1.57937	large			1.57937		3.24232	1.86729	1.73638	small	1.73638
				10.1946	3.56347	2.86086	medium		2.86086			2.96115	2.30742	1.28332	small	1.28332				32.4297	25.7795	1.25796	large			1.25796		9.85464	7.18605	1.37136	medium		1.37136			11.2195	6.72082	1.66937	medium		1.66937
				8.96824	3.00335	2.98608	medium		2.98608			2.23928	1.33532	1.67695	small	1.67695				9.39079	7.587	1.23775	medium		1.23775			4.02733	2.33726	1.7231	medium		1.7231			9.16173	5.13057	1.78571	medium		1.78571
				7.11885	3.29164	2.16271	medium		2.16271			13.7418	6.45198	2.12985	medium		2.12985			6.30702	3.85	1.63819	medium		1.63819			38.9528	21.3925	1.82086	large			1.82086		24.4917	11.5259	2.12493	large			2.12493
				14.3755	5.3271	2.69856	medium		2.69856			8.81575	6.93128	1.27188	medium		1.27188			8.34317	4.72019	1.76755	medium		1.76755			10.4145	6.03896	1.72455	medium		1.72455			3.66962	1.81649	2.02017	small	2.02017
				13.3672	3.2954	4.05633	medium		4.05633			3.54483	5.19571	0.68226	small	0.68226				9.23324	4.95829	1.86218	medium		1.86218			8.50508	4.33557	1.9617	medium		1.9617			47.9066	27.2708	1.7567	large			1.7567
				5.5416	1.09392	5.06582	medium		5.06582			9.71858	6.27737	1.54819	medium		1.54819			3.92542	2.08363	1.88393	small	1.88393				14.6384	12.0195	1.21788	medium		1.21788			2.24979	1.08604	2.07156	small	2.07156
				5.69755	2.48789	2.29011	medium		2.29011			13.7695	8.50776	1.61846	medium		1.61846			8.17368	5.97835	1.36721	medium		1.36721			8.81534	3.75628	2.34682	medium		2.34682			9.18757	5.02286	1.82915	medium		1.82915
				13.0928	4.74064	2.76182	medium		2.76182			7.19736	2.23738	3.21687	medium		3.21687			12.2679	9.05666	1.35458	medium		1.35458			4.60596	2.04522	2.25205	medium		2.25205			11.2907	6.14182	1.83833	medium		1.83833
				8.85938	1.9795	4.47557	medium		4.47557			13.8926	9.0746	1.53093	medium		1.53093			3.75819	1.1385	3.30099	small	3.30099				9.47174	3.21146	2.94936	medium		2.94936			3.74753	2.59303	1.44523	small	1.44523
				21.4986	8.09483	2.65584	large			2.65584		26.1174	15.4976	1.68526	large			1.68526		4.05133	3.22757	1.25522	medium		1.25522			5.70424	4.09811	1.39192	medium		1.39192			5.42454	1.29816	4.17862	medium		4.17862
				13.8162	5.28384	2.6148	medium		2.6148			25.6731	14.7736	1.73776	large			1.73776		2.20694	2.85955	0.771778	small	0.771778				9.30593	4.66208	1.99609	medium		1.99609			6.45562	3.29103	1.96158	medium		1.96158
				18.3761	6.72672	2.73181	large			2.73181		35.0388	23.557	1.4874	large			1.4874		7.98708	4.51775	1.76793	medium		1.76793			4.41878	2.16108	2.04471	medium		2.04471			5.86933	2.60103	2.25654	medium		2.25654
				4.85218	1.98185	2.44831	medium		2.44831			2.32758	1.02813	2.26389	small	2.26389				13.0111	9.52016	1.36669	medium		1.36669			49.7476	26.5486	1.87383	large			1.87383		3.2133	1.21444	2.64591	small	2.64591
				12.0853	4.06764	2.97108	medium		2.97108			5.50969	1.90518	2.89196	medium		2.89196			21.1425	13.937	1.51701	large			1.51701		7.6538	4.08853	1.87202	medium		1.87202			14.5974	5.47627	2.66557	medium		2.66557
				7.62955	1.65358	4.61396	medium		4.61396			1.61283	1.88817	0.85418	small	0.85418				11.3511	6.04905	1.87651	medium		1.87651			5.57945	4.0148	1.38972	medium		1.38972			2.48312	1.18058	2.10331	small	2.10331
				11.5074	3.70833	3.10313	medium		3.10313			1.43662	1.69955	0.845296	small	0.845296				4.26473	2.60877	1.63477	medium		1.63477			6.79483	5.2586	1.29214	medium		1.29214			15.7394	10.2042	1.54244	medium		1.54244
				6.27348	2.48601	2.52351	medium		2.52351			3.25735	1.64051	1.98557	small	1.98557				13.098	9.62651	1.36061	medium		1.36061			4.23587	2.71739	1.5588	medium		1.5588			7.19535	2.59727	2.77035	medium		2.77035
				13.0248	2.2899	5.68796	medium		5.68796			14.0621	7.87436	1.78581	medium		1.78581			6.07167	3.99141	1.52118	medium		1.52118			6.78116	3.29764	2.05637	medium		2.05637			18.8032	8.7278	2.15441	large			2.15441
				24.892	10.2291	2.43346	large			2.43346		4.37797	2.21387	1.97752	medium		1.97752			6.54431	3.01969	2.16721	medium		2.16721			5.58287	1.99639	2.79648	medium		2.79648			3.29042	2.6744	1.23034	small	1.23034
				8.81731	3.37159	2.61518	medium		2.61518			8.33146	6.56255	1.26954	medium		1.26954			11.9441	7.09631	1.68315	medium		1.68315			11.5367	6.59527	1.74924	medium		1.74924			5.87648	1.98393	2.96204	medium		2.96204
				13.7841	3.83907	3.59049	medium		3.59049			6.93364	4.56082	1.52026	medium		1.52026			7.00823	2.83236	2.47434	medium		2.47434			8.02901	4.26088	1.88435	medium		1.88435			3.18826	1.31698	2.42089	small	2.42089
				6.36729	2.08814	3.04926	medium		3.04926			3.47712	3.10492	1.11987	small	1.11987				6.52235	4.76793	1.36796	medium		1.36796			44.0279	21.7611	2.02324	large			2.02324		1.82686	1.07522	1.69906	small	1.69906
				21.6789	8.39582	2.5821	large			2.5821		8.67121	5.03311	1.72283	medium		1.72283			5.57643	3.38046	1.64961	medium		1.64961			1.07948	1.3338	0.809328	small	0.809328				11.6011	7.13002	1.62708	medium		1.62708
				7.70135	2.71787	2.83359	medium		2.83359			5.23211	3.67227	1.42476	medium		1.42476			4.93139	3.00398	1.64162	medium		1.64162			9.55635	4.93975	1.93458	medium		1.93458			19.7004	14.0997	1.39722	large			1.39722
				5.69253	2.80911	2.02645	medium		2.02645			5.3608	3.33356	1.60813	medium		1.60813			23.9009	12.8347	1.8622	large			1.8622		3.4128	1.25816	2.71254	small	2.71254				4.22253	2.61326	1.61581	medium		1.61581
				11.2604	5.03082	2.23828	medium		2.23828			7.05243	3.83937	1.83687	medium		1.83687			6.84293	4.73288	1.44583	medium		1.44583			18.5828	8.64624	2.14923	large			2.14923		9.92292	5.09341	1.94819	medium		1.94819
				8.01672	2.46297	3.2549	medium		3.2549			17.675	10.1468	1.74194	large			1.74194		14.0562	7.69517	1.82662	medium		1.82662			3.94015	2.12565	1.85362	small	1.85362				27.3636	13.8179	1.9803	large			1.9803
				8.88718	1.79702	4.9455	medium		4.9455			6.25968	4.39021	1.42583	medium		1.42583			2.90718	2.32595	1.24989	small	1.24989				9.95721	5.23371	1.90252	medium		1.90252			16.2923	7.88634	2.06589	large			2.06589
				3.99446	3.00758	1.32813	small	1.32813				7.66066	3.79134	2.02057	medium		2.02057			16.9569	11.6521	1.45526	large			1.45526		4.16493	3.20284	1.30039	medium		1.30039			1.30774	1.22197	1.07019	small	1.07019
				6.78727	2.82839	2.39969	medium		2.39969			6.17138	3.99147	1.54614	medium		1.54614			1.52639	1.44428	1.05685	small	1.05685				10.4555	4.34323	2.40731	medium		2.40731			28.0838	16.0097	1.75417	large			1.75417
				2.5527	1.11509	2.28925	small	2.28925				4.94819	2.71618	1.82175	medium		1.82175			2.09459	1.06538	1.96605	small	1.96605				2.6299	1.33763	1.96609	small	1.96609				6.66908	3.78255	1.76312	medium		1.76312
				9.47122	3.11669	3.03887	medium		3.03887			6.65289	3.66977	1.81289	medium		1.81289			4.84197	2.13379	2.26919	medium		2.26919			34.0417	15.5584	2.18799	large			2.18799		6.807	3.38792	2.0092	medium		2.0092
				4.69585	1.72224	2.72659	medium		2.72659			9.05848	4.08302	2.21857	medium		2.21857			3.27328	2.10659	1.55383	small	1.55383				20.9879	11.784	1.78106	large			1.78106		46.1962	24.7803	1.86423	large			1.86423
				6.30746	1.41184	4.46753	medium		4.46753			10.185	6.76718	1.50507	medium		1.50507			5.4318	2.6982	2.01312	medium		2.01312			5.34527	3.64904	1.46484	medium		1.46484			7.09678	3.48341	2.03731	medium		2.03731
				7.53189	2.82698	2.66429	medium		2.66429			4.59299	3.54469	1.29574	medium		1.29574			2.50718	1.43159	1.75133	small	1.75133				20.7093	10.4128	1.98882	large			1.98882		19.917	9.74516	2.04378	large			2.04378
				12.8612	3.62132	3.55152	medium		3.55152			1.11706	1.57647	0.708583	small	0.708583				8.28183	4.74437	1.74561	medium		1.74561			6.29825	3.50733	1.79574	medium		1.79574			10.6376	4.66727	2.27919	medium		2.27919
				11.0415	3.13315	3.5241	medium		3.5241			7.36051	4.35719	1.68928	medium		1.68928			2.64181	1.30892	2.01832	small	2.01832				3.64699	1.84128	1.98068	small	1.98068				13.1319	7.34215	1.78856	medium		1.78856
				7.60214	2.33928	3.24978	medium		3.24978			3.58086	3.06089	1.16988	small	1.16988				7.14188	2.99915	2.38131	medium		2.38131			1.52734	2.48663	0.614221	small	0.614221				10.14	6.25846	1.6202	medium		1.6202
				6.49583	4.47727	1.45085	medium		1.45085			4.27264	2.57709	1.65793	medium		1.65793			5.2736	3.64877	1.44531	medium		1.44531			8.65123	4.76549	1.81539	medium		1.81539			45.2538	24.3199	1.86077	large			1.86077
				3.01824	3.00664	1.00386	small	1.00386				8.02972	5.13817	1.56276	medium		1.56276			8.83744	6.0841	1.45255	medium		1.45255			2.25469	1.08198	2.08385	small	2.08385				14.3414	7.97383	1.79856	medium		1.79856
				4.8325	1.52237	3.17433	medium		3.17433			6.57013	3.7188	1.76674	medium		1.76674			4.35964	2.82088	1.54549	medium		1.54549			3.82391	1.71393	2.23108	small	2.23108				5.22182	2.9585	1.76502	medium		1.76502
				6.37423	1.28204	4.97194	medium		4.97194			5.94804	1.16972	5.085	medium		5.085			2.84229	2.30239	1.2345	small	1.2345				14.3264	5.88385	2.43487	medium		2.43487			2.92353	1.70266	1.71704	small	1.71704
				9.12226	4.11138	2.21878	medium		2.21878			8.52311	5.61297	1.51847	medium		1.51847			3.79499	3.30432	1.1485	small	1.1485				9.02986	4.08757	2.2091	medium		2.2091			8.63307	4.22797	2.0419	medium		2.0419
				4.79274	1.84781	2.59373	medium		2.59373			6.10406	4.71791	1.29381	medium		1.29381			5.70298	3.85484	1.47944	medium		1.47944			11.2897	3.87884	2.91058	medium		2.91058			10.6857	6.27728	1.70228	medium		1.70228
				3.62196	1.06429	3.40317	small	3.40317				4.60052	3.7168	1.23776	medium		1.23776			11.0993	6.71137	1.6538	medium		1.6538			12.2068	6.0629	2.01335	medium		2.01335			6.36619	3.47729	1.83079	medium		1.83079
				7.17521	2.68965	2.66771	medium		2.66771			8.0804	4.57532	1.76608	medium		1.76608			20.1039	12.0739	1.66507	large			1.66507		2.52135	2.22236	1.13454	small	1.13454				23.0826	13.1049	1.76138	large			1.76138
				4.26815	1.43113	2.98237	medium		2.98237			13.3089	6.483	2.0529	medium		2.0529			44.0849	31.2943	1.40872	large			1.40872		6.56748	3.49009	1.88175	medium		1.88175			5.85343	3.59629	1.62763	medium		1.62763
				8.41547	2.65626	3.16816	medium		3.16816			10.1197	5.91415	1.7111	medium		1.7111			18.0578	11.0593	1.63281	large			1.63281		16.1298	4.88996	3.29856	large			3.29856		4.97776	2.68616	1.85311	medium		1.85311
				7.99201	3.10587	2.57319	medium		2.57319			22.6612	16.1064	1.40697	large			1.40697		29.8763	19.1074	1.5636	large			1.5636		14.2221	6.66421	2.13411	medium		2.13411			3.14891	2.05684	1.53095	small	1.53095
				11.7973	5.20624	2.266	medium		2.266			27.1948	14.1042	1.92814	large			1.92814		9.19644	7.35253	1.25079	medium		1.25079			6.10936	3.00368	2.03396	medium		2.03396			6.13922	2.89076	2.12374	medium		2.12374
				58.5694	27.0207	2.16757	large			2.16757		22.0823	14.3519	1.53864	large			1.53864		9.72687	4.51654	2.15361	medium		2.15361			7.96662	4.844	1.64464	medium		1.64464			15.0879	8.88725	1.6977	medium		1.6977
				9.10219	2.94032	3.09564	medium		3.09564			8.82128	5.07663	1.73762	medium		1.73762			15.8043	11.8848	1.3298	medium		1.3298			2.28717	2.12661	1.0755	small	1.0755				9.40142	4.94102	1.90273	medium		1.90273
				8.63936	3.21639	2.68604	medium		2.68604			19.2324	10.8332	1.77533	large			1.77533		5.09733	2.67524	1.90537	medium		1.90537			3.90254	1.88341	2.07207	small	2.07207				4.01663	3.15698	1.2723	medium		1.2723
				2.67353	1.1988	2.23017	small	2.23017				6.47113	3.14644	2.05665	medium		2.05665			11.5961	7.07455	1.63913	medium		1.63913			3.17178	1.14134	2.77899	small	2.77899				13.2996	6.64603	2.00113	medium		2.00113
				14.4342	4.50173	3.20637	medium		3.20637			3.18211	1.57948	2.01466	small	2.01466				7.35205	4.33828	1.69469	medium		1.69469			1.15213	2.34588	0.491129	small	0.491129				12.5098	6.01388	2.08015	medium		2.08015
				21.9997	7.44863	2.95351	large			2.95351		4.79494	4.98158	0.962535	medium		0.962535			5.4192	3.63306	1.49164	medium		1.49164			6.9709	2.44833	2.8472	medium		2.8472			3.23477	2.50132	1.29323	small	1.29323
				16.1755	5.80446	2.78673	large			2.78673		5.15212	3.48415	1.47873	medium		1.47873			7.10314	4.29235	1.65484	medium		1.65484			4.34869	1.96479	2.21331	medium		2.21331			3.68393	2.14997	1.71348	small	1.71348
				5.34126	1.72036	3.10473	medium		3.10473			37.2524	23.3945	1.59236	large			1.59236		4.14237	2.53142	1.63638	medium		1.63638			17.1623	10.4894	1.63615	large			1.63615		6.26443	4.46267	1.40374	medium		1.40374
				5.39144	2.11824	2.54525	medium		2.54525			40.4472	24.7788	1.63233	large			1.63233		28.9065	19.4742	1.48435	large			1.48435		8.65038	2.03565	4.24944	medium		4.24944			9.54412	5.14656	1.85447	medium		1.85447
				3.33863	1.48615	2.24649	small	2.24649				14.8351	10.2318	1.4499	medium		1.4499			17.0789	11.5705	1.47607	large			1.47607		9.01533	4.24652	2.12299	medium		2.12299			5.46309	2.89218	1.88892	medium		1.88892
				15.1564	5.85619	2.5881	medium		2.5881			3.13419	2.15383	1.45517	small	1.45517				2.54173	1.17718	2.15917	small	2.15917				3.39485	2.73463	1.24143	small	1.24143				10.0485	5.82104	1.72624	medium		1.72624
				11.0461	3.11857	3.54206	medium		3.54206			3.80499	1.07867	3.52749	small	3.52749				2.16368	1.05571	2.04949	small	2.04949				2.0846	1.65073	1.26283	small	1.26283				2.09199	1.70737	1.22527	small	1.22527
				83.312	32.6972	2.54798	large			2.54798		4.513	2.62212	1.72113	medium		1.72113			6.45165	5.0864	1.26841	medium		1.26841			12.0281	3.12337	3.85102	medium		3.85102			10.2346	8.51332	1.20218	medium		1.20218
				9.48704	3.12986	3.03114	medium		3.03114			10.8226	6.34792	1.7049	medium		1.7049			4.52655	2.4583	1.84134	medium		1.84134			3.50682	3.5351	0.992	small	0.992				13.2626	7.54252	1.75838	medium		1.75838
				5.79946	1.76081	3.29363	medium		3.29363			7.63492	5.59145	1.36546	medium		1.36546			1.3201	1.68842	0.781854	small	0.781854				1.21794	1.3022	0.935295	small	0.935295				5.08588	2.46322	2.06473	medium		2.06473
				7.77816	2.3468	3.31436	medium		3.31436			10.7762	4.17958	2.57831	medium		2.57831			15.2791	10.9795	1.3916	medium		1.3916			4.66236	2.47227	1.88586	medium		1.88586			3.01813	2.67299	1.12912	small	1.12912
				14.8468	4.1316	3.59348	medium		3.59348			8.63993	4.02248	2.14791	medium		2.14791			5.92671	2.68672	2.20593	medium		2.20593			3.17776	1.42955	2.22291	small	2.22291				15.4003	9.06551	1.69878	medium		1.69878
				16.0987	6.51273	2.47188	large			2.47188		4.79177	1.81362	2.6421	medium		2.6421			17.2503	12.2903	1.40358	large			1.40358		1.52905	1.12411	1.36023	small	1.36023				7.40045	4.8319	1.53158	medium		1.53158
				4.45806	1.99549	2.23407	medium		2.23407			11.1382	6.27737	1.77434	medium		1.77434			8.05455	6.29863	1.27878	medium		1.27878			12.3298	3.73234	3.30351	medium		3.30351			11.6572	6.62016	1.76086	medium		1.76086
				5.98011	2.77478	2.15517	medium		2.15517			1.08974	1.06566	1.0226	small	1.0226				3.528	2.33804	1.50896	small	1.50896				4.43672	2.5527	1.73805	medium		1.73805			2.37977	1.40775	1.69047	small	1.69047
				11.57	4.15746	2.78294	medium		2.78294			17.9067	10.4244	1.71776	large			1.71776		8.90653	5.02355	1.77295	medium		1.77295			7.32901	2.95389	2.48114	medium		2.48114			18.94	10.6741	1.77439	large			1.77439
				12.1243	2.83216	4.28094	medium		4.28094			6.37056	3.46514	1.83847	medium		1.83847			8.93204	7.4184	1.20404	medium		1.20404			3.91792	5.35818	0.731204	small	0.731204				12.9876	7.32333	1.77345	medium		1.77345
				4.2473	1.62771	2.60937	medium		2.60937			11.6759	7.1274	1.63817	medium		1.63817			2.92752	1.53674	1.90502	small	1.90502				8.16063	4.34993	1.87604	medium		1.87604			45.0983	28.3258	1.59213	large			1.59213
				9.81979	3.84942	2.55098	medium		2.55098			5.90884	3.59822	1.64216	medium		1.64216			2.38127	1.54157	1.5447	small	1.5447				12.1837	6.27355	1.94207	medium		1.94207			48.45	29.3305	1.65186	large			1.65186
				14.711	4.42507	3.32446	medium		3.32446			7.46782	3.79034	1.97022	medium		1.97022			4.47942	4.26334	1.05068	medium		1.05068			8.03329	4.97135	1.61592	medium		1.61592			12.0165	7.46115	1.61054	medium		1.61054
				16.9174	6.37776	2.65256	large			2.65256		2.12523	1.76309	1.2054	small	1.2054				4.4933	2.11928	2.1202	medium		2.1202			16.9691	5.12551	3.31072	large			3.31072		5.4142	2.47968	2.18343	medium		2.18343
				9.89313	3.44778	2.86942	medium		2.86942			5.67759	3.74031	1.51795	medium		1.51795			2.37191	1.42615	1.66316	small	1.66316				4.63501	1.35869	3.41137	medium		3.41137			6.32167	3.63298	1.74008	medium		1.74008
				6.30475	3.11057	2.02688	medium		2.02688			4.64605	3.62374	1.28212	medium		1.28212			1.96997	1.12823	1.74608	small	1.74608				1.25042	1.89298	0.660555	small	0.660555				14.5362	8.2805	1.75547	medium		1.75547
				8.2877	5.85808	1.41475	medium		1.41475			7.46544	3.83837	1.94495	medium		1.94495			9.66553	6.85156	1.4107	medium		1.4107			4.04869	2.65132	1.52705	medium		1.52705			2.54234	1.48019	1.71758	small	1.71758
				29.4435	11.5511	2.54899	large			2.54899		8.72585	4.91353	1.77588	medium		1.77588			6.83777	4.39025	1.55749	medium		1.55749			1.33674	2.31907	0.576414	small	0.576414				2.57215	1.745	1.47402	small	1.47402
				7.56779	2.29319	3.30011	medium		3.30011			9.53009	7.20645	1.32244	medium		1.32244			1.71687	1.54882	1.1085	small	1.1085				12.2324	7.12094	1.71781	medium		1.71781			5.68489	2.6142	2.17462	medium		2.17462
				23.1245	8.46025	2.73331	large			2.73331		15.9367	10.5065	1.51684	medium		1.51684			6.20242	3.36656	1.84236	medium		1.84236			9.67772	4.92252	1.96601	medium		1.96601			7.2514	4.3004	1.68621	medium		1.68621
				9.9186	3.33961	2.96999	medium		2.96999			2.91641	2.17835	1.33882	small	1.33882				20.8445	11.9724	1.74105	large			1.74105		3.89485	3.49871	1.11322	small	1.11322				4.09891	2.77647	1.4763	medium		1.4763
				27.0892	12.4047	2.18379	large			2.18379		12.8108	7.10239	1.80373	medium		1.80373			7.76271	5.71004	1.35948	medium		1.35948			2.62135	1.21411	2.15907	small	2.15907				3.7527	1.25583	2.98822	small	2.98822
				2.2107	1.19127	1.85574	small	1.85574				14.367	10.9137	1.31641	medium		1.31641			5.37659	3.12726	1.71927	medium		1.71927			15.4418	7.8113	1.97685	medium		1.97685			20.1579	10.1713	1.98184	large			1.98184
				8.00977	1.96445	4.07736	medium		4.07736			5.40792	2.21937	2.43669	medium		2.43669			2.76642	2.164	1.27838	small	1.27838				5.19228	3.06784	1.69249	medium		1.69249			11.0486	5.90194	1.87203	medium		1.87203
				10.4729	4.56616	2.2936	medium		2.2936			10.5969	6.19633	1.71019	medium		1.71019			5.79854	3.8778	1.49532	medium		1.49532			6.13244	1.91022	3.21034	medium		3.21034			5.92855	2.61561	2.2666	medium		2.2666
				6.62553	2.15868	3.06924	medium		3.06924			10.2737	7.73728	1.32782	medium		1.32782			6.57304	4.99092	1.317	medium		1.317			12.4649	8.00184	1.55775	medium		1.55775			3.8628	1.55733	2.48041	small	2.48041
				12.1428	5.1244	2.3696	medium		2.3696			9.50198	6.40746	1.48296	medium		1.48296			6.70411	2.66376	2.51679	medium		2.51679			2.20938	2.35258	0.939131	small	0.939131				31.3067	18.7839	1.66668	large			1.66668
				5.5721	1.74247	3.19782	medium		3.19782			9.58038	5.3453	1.7923	medium		1.7923			23.1264	14.2198	1.62635	large			1.62635		23.7793	12.3958	1.91834	large			1.91834		2.81422	2.23651	1.25831	small	1.25831
				9.44921	4.52571	2.0879	medium		2.0879			24.5818	14.9607	1.64308	large			1.64308		6.44745	4.00531	1.60973	medium		1.60973			16.3332	8.3791	1.94928	large			1.94928		2.83092	1.31133	2.15881	small	2.15881
				4.33029	1.44571	2.99528	medium		2.99528			4.75416	3.80735	1.24868	medium		1.24868			6.90556	4.5389	1.52142	medium		1.52142			21.3742	12.1344	1.76145	large			1.76145		6.44171	2.6396	2.44041	medium		2.44041
				7.2528	2.69624	2.68997	medium		2.68997			2.30738	1.01713	2.26853	small	2.26853				5.50992	4.28449	1.28602	medium		1.28602			8.36405	5.42425	1.54198	medium		1.54198			7.52845	3.49469	2.15425	medium		2.15425
				3.09351	1.40526	2.20138	small	2.20138				8.80584	7.1174	1.23723	medium		1.23723			7.98288	4.89544	1.63068	medium		1.63068			8.46832	6.13663	1.37996	medium		1.37996			7.55269	3.82911	1.97244	medium		1.97244
				14.6268	5.89899	2.47954	medium		2.47954			1.15548	1.1347	1.01831	small	1.01831				3.30331	1.90838	1.73095	small	1.73095				4.8769	3.48722	1.39851	medium		1.39851			8.1692	4.90245	1.66635	medium		1.66635
				23.5171	7.31037	3.21695	large			3.21695		3.77252	1.48992	2.53203	small	2.53203				7.46957	5.27192	1.41686	medium		1.41686			9.42473	6.11556	1.54111	medium		1.54111			8.32144	5.62537	1.47927	medium		1.47927
				11.2438	3.04285	3.69515	medium		3.69515			4.53478	2.1048	2.15449	medium		2.15449			5.19935	3.18164	1.63417	medium		1.63417			6.7068	4.72144	1.4205	medium		1.4205			7.89931	2.17348	3.6344	medium		3.6344
				16.8599	7.40819	2.27585	large			2.27585		5.58968	3.00686	1.85898	medium		1.85898			3.53478	2.45709	1.43861	small	1.43861				12.3281	6.35015	1.94139	medium		1.94139			1.89245	1.36166	1.38981	small	1.38981
				19.7233	9.70467	2.03236	large			2.03236		8.03249	4.5368	1.77052	medium		1.77052			4.23761	1.18322	3.58142	medium		3.58142			4.76664	3.77926	1.26126	medium		1.26126			1.79665	1.32968	1.3512	small	1.3512
				22.1614	6.17506	3.58885	large			3.58885		12.0176	6.61959	1.81547	medium		1.81547			1.36013	1.16026	1.17226	small	1.17226				7.7538	3.69021	2.10118	medium		2.10118			3.29876	1.62411	2.03111	small	2.03111
				6.0191	1.74106	3.45716	medium		3.45716			9.9039	6.44898	1.53573	medium		1.53573			9.96932	4.84226	2.05881	medium		2.05881			28.0819	14.713	1.90865	large			1.90865		10.7151	5.40948	1.9808	medium		1.9808
				4.92977	2.60688	1.89106	medium		1.89106			27.5873	16.4336	1.67871	large			1.67871		2.84326	1.94222	1.46392	small	1.46392				2.90938	3.45562	0.841927	small	0.841927				10.5633	5.57222	1.8957	medium		1.8957
				43.3998	15.9893	2.7143	large			2.7143		21.8301	12.4062	1.75962	large			1.75962		5.67038	3.8639	1.46753	medium		1.46753			4.0504	2.61111	1.55122	medium		1.55122			6.5065	3.1504	2.0653	medium		2.0653
				13.861	6.24325	2.22015	medium		2.22015			31.1048	20.8949	1.48863	large			1.48863		4.64665	1.3343	3.48247	medium		3.48247			30.7306	17.1805	1.78869	large			1.78869		5.1936	2.06107	2.51985	medium		2.51985
				6.10788	2.11448	2.8886	medium		2.8886			5.85102	3.57071	1.63862	medium		1.63862			2.7209	1.01946	2.66898	small	2.66898				6.34099	3.04103	2.08515	medium		2.08515			6.42462	3.51633	1.82708	medium		1.82708
				5.55048	2.97042	1.86858	medium		1.86858			32.0587	19.8678	1.6136	large			1.6136		6.51945	5.57528	1.16935	medium		1.16935			15.5956	7.87354	1.98077	medium		1.98077			3.80795	1.57332	2.42033	small	2.42033
				5.27178	1.19786	4.401	medium		4.401			27.08	17.4738	1.54975	large			1.54975		5.71945	2.6982	2.11972	medium		2.11972			53.5065	26.8522	1.99263	large			1.99263		5.43924	2.60056	2.09157	medium		2.09157
				4.88885	2.39054	2.04508	medium		2.04508			12.7407	6.3119	2.01852	medium		2.01852			6.24665	3.40342	1.8354	medium		1.8354			32.8066	17.9254	1.83018	large			1.83018		17.2435	10.7282	1.60731	large			1.60731
				2.82871	1.05207	2.68872	small	2.68872				4.25561	1.26228	3.37137	medium		3.37137			9.77497	7.21898	1.35407	medium		1.35407			6.50765	3.35317	1.94075	medium		1.94075			3.3087	1.50041	2.20519	small	2.20519
				3.54051	1.18469	2.98856	small	2.98856				30.0629	18.598	1.61646	large			1.61646		10.9595	5.61093	1.95324	medium		1.95324			6.42902	3.17029	2.0279	medium		2.0279			12.6783	6.51481	1.94608	medium		1.94608
				5.66127	2.02888	2.79034	medium		2.79034			32.1822	22.5029	1.43014	large			1.43014		8.65827	5.12991	1.6878	medium		1.6878			10.276	5.91736	1.73659	medium		1.73659			6.06966	3.88696	1.56154	medium		1.56154
				56.0499	26.4291	2.12077	large			2.12077		6.46995	3.92643	1.6478	medium		1.6478			4.6502	3.18769	1.4588	medium		1.4588			19.2674	10.0164	1.92358	large			1.92358		2.99111	1.45432	2.0567	small	2.0567
				19.4913	5.50112	3.54316	large			3.54316		26.4765	14.8021	1.7887	large			1.7887		4.8	3.26202	1.47148	medium		1.47148			10.4076	6.1845	1.68286	medium		1.68286			2.71286	1.3706	1.97933	small	1.97933
				9.31913	2.89235	3.22199	medium		3.22199			5.84786	3.70179	1.57974	medium		1.57974			6.49814	1.26299	5.14505	medium		5.14505			4.60254	2.45887	1.87181	medium		1.87181			9.01903	3.7802	2.38586	medium		2.38586
				5.84771	2.7047	2.16205	medium		2.16205			9.73164	6.65111	1.46316	medium		1.46316			13.8318	10.3807	1.33245	medium		1.33245			11.5965	7.54224	1.53754	medium		1.53754			6.50014	3.72422	1.74537	medium		1.74537
				8.13213	2.54856	3.19087	medium		3.19087			3.48701	2.63062	1.32555	small	1.32555				7.92671	5.13112	1.54483	medium		1.54483			4.13416	1.47264	2.80732	medium		2.80732			3.10916	1.85365	1.67732	small	1.67732
				4.63293	1.42784	3.24472	medium		3.24472			1.40099	2.69267	0.520297	small	0.520297				2.3519	1.86548	1.26075	small	1.26075				12.7392	7.31244	1.74213	medium		1.74213			3.33573	1.58884	2.09948	small	2.09948
				8.25296	3.08188	2.67789	medium		2.67789			15.4861	9.3923	1.6488	medium		1.6488			3.08894	2.35134	1.3137	small	1.3137				35.8878	19.533	1.83729	large			1.83729		15.9437	7.94184	2.00756	medium		2.00756
				3.11319	1.5567	1.99987	small	1.99987				14.9939	8.85347	1.69356	medium		1.69356			4.83002	2.94597	1.63954	medium		1.63954			11.5264	6.27451	1.83702	medium		1.83702			5.85104	3.56148	1.64287	medium		1.64287
				12.8531	4.24776	3.02585	medium		3.02585			28.7316	20.6427	1.39185	large			1.39185		2.95722	1.45455	2.03308	small	2.03308				6.10595	2.52302	2.4201	medium		2.4201			10.1992	5.03838	2.0243	medium		2.0243
				7.9179	1.55482	5.09249	medium		5.09249			10.2433	6.15981	1.66292	medium		1.66292			8.69991	5.58314	1.55825	medium		1.55825			28.9212	14.8384	1.94908	large			1.94908		9.40301	4.85259	1.93773	medium		1.93773
				5.16987	1.27687	4.04887	medium		4.04887			6.54361	1.86015	3.51778	medium		3.51778			20.4878	12.4238	1.64907	large			1.64907		9.7649	3.03815	3.21409	medium		3.21409			12.4001	5.95885	2.08095	medium		2.08095
				12.933	4.10714	3.1489	medium		3.1489			1.9114	2.08779	0.915516	small	0.915516				8.41936	4.70448	1.78965	medium		1.78965			5.85466	1.67659	3.49201	medium		3.49201			2.97362	2.16831	1.3714	small	1.3714
				2.40139	2.81334	0.853571	small	0.853571				45.84	27.7797	1.65013	large			1.65013		5.94866	3.75815	1.58287	medium		1.58287			3.90938	3.67393	1.06409	small	1.06409				1.04619	1.59919	0.654203	small	0.654203
				4.11567	2.38067	1.72879	medium		1.72879			12.8979	7.26749	1.77474	medium		1.77474			4.66473	1.00314	4.65013	medium		4.65013			6.67945	1.45157	4.60152	medium		4.60152			7.84247	3.37287	2.32516	medium		2.32516
				3.78023	1.70625	2.21551	small	2.21551				15.7712	7.61421	2.07128	medium		2.07128			1.91089	1.92893	0.99065	small	0.99065				9.83071	6.93135	1.4183	medium		1.4183			9.62401	5.00169	1.92415	medium		1.92415
				3.87634	2.61488	1.48242	small	1.48242				3.17657	1.4634	2.17067	small	2.17067				1.60226	1.58931	1.00815	small	1.00815				13.1136	6.30419	2.08014	medium		2.08014			3.16402	2.04367	1.54821	small	1.54821
				5.45127	2.09943	2.59656	medium		2.59656			4.19147	3.42662	1.22321	medium		1.22321			3.5477	2.91333	1.21774	small	1.21774				2.9752	1.82212	1.63282	small	1.63282				8.27056	5.56188	1.48701	medium		1.48701
				5.20654	1.88732	2.7587	medium		2.7587			3.00748	1.87216	1.60643	small	1.60643				9.21549	4.50929	2.04367	medium		2.04367			11.629	6.51676	1.78447	medium		1.78447			4.38868	3.0996	1.41589	medium		1.41589
				3.32898	1.54447	2.15542	small	2.15542				2.69267	1.08467	2.48248	small	2.48248				1.70008	2.82934	0.600875	small	0.600875				3.17776	2.70207	1.17605	small	1.17605				24.8073	14.2243	1.74401	large			1.74401
				7.68822	2.69389	2.85395	medium		2.85395			3.6268	2.41499	1.50179	small	1.50179				7.87538	5.17886	1.52068	medium		1.52068			4.45125	1.32423	3.3614	medium		3.3614			1.20638	1.32874	0.907917	small	0.907917
				6.20477	3.50657	1.76947	medium		1.76947			10.644	5.71003	1.86409	medium		1.86409			5.72655	2.48247	2.3068	medium		2.3068			6.11962	2.13906	2.86089	medium		2.86089			5.58592	2.49614	2.23782	medium		2.23782
				6.27657	2.49777	2.51287	medium		2.51287			3.61096	1.76259	2.04867	small	2.04867				2.77191	1.15663	2.39654	small	2.39654				11.7666	5.62341	2.09243	medium		2.09243			30.5125	15.6518	1.94945	large			1.94945
				4.34072	1.65311	2.62579	medium		2.62579			9.08857	5.61046	1.61993	medium		1.61993			4.66247	1.16388	4.00596	medium		4.00596			1.45213	1.42189	1.02127	small	1.02127				6.37255	4.12073	1.54646	medium		1.54646
				6.48193	1.85534	3.49366	medium		3.49366			9.58909	4.38121	2.18869	medium		2.18869			13.0269	7.8964	1.64973	medium		1.64973			3.79057	2.10842	1.79783	small	1.79783				19.3367	7.99593	2.41831	large			2.41831
				12.7516	4.31078	2.95806	medium		2.95806			8.50529	2.19636	3.87246	medium		3.87246			2.21921	1.46845	1.51126	small	1.51126				4.95296	1.45445	3.40539	medium		3.40539			3.325	1.7036	1.95174	small	1.95174
				18.7529	6.01328	3.11858	large			3.11858		6.61448	2.29792	2.87847	medium		2.87847			47.2791	32.1295	1.47152	large			1.47152		12.2939	8.00951	1.53492	medium		1.53492			6.6965	3.15228	2.12434	medium		2.12434
				13.2989	5.84255	2.27622	medium		2.27622			4.07425	2.03226	2.00479	medium		2.00479			18.4655	12.2933	1.50208	large			1.50208		3.84015	3.36658	1.14067	small	1.14067				13.1386	6.04728	2.17265	medium		2.17265
				9.44072	2.45309	3.8485	medium		3.8485			2.69465	1.24176	2.17002	small	2.17002				5.31719	3.15868	1.68336	medium		1.68336			3.5222	1.02644	3.43147	small	3.43147				6.63966	3.66496	1.81166	medium		1.81166
				27.4733	10.5357	2.60764	large			2.60764		8.84346	6.3209	1.39908	medium		1.39908			11.0586	6.65819	1.6609	medium		1.6609			8.63157	2.3861	3.61745	medium		3.61745			3.68035	1.33532	2.75616	small	2.75616
				10.4822	4.19932	2.49616	medium		2.49616			10.0136	8.32364	1.20303	medium		1.20303			7.805	4.57818	1.70482	medium		1.70482			16.9845	10.2903	1.65054	large			1.65054		3.50466	1.81273	1.93337	small	1.93337
				14.174	6.48734	2.18487	medium		2.18487			6.5634	5.16369	1.27107	medium		1.27107			25.7233	16.0732	1.60039	large			1.60039		21.1153	11.5906	1.82176	large			1.82176		3.53209	1.62459	2.17415	small	2.17415
				10.7007	3.12892	3.41993	medium		3.41993			3.73767	4.19359	0.891282	small	0.891282				4.05972	1.93558	2.09742	medium		2.09742			35.9382	19.398	1.85268	large			1.85268		4.39146	2.81504	1.56	medium		1.56
				63.4621	26.5593	2.38945	large			2.38945		9.88846	6.52353	1.51581	medium		1.51581			1.00404	1.26118	0.796111	small	0.796111				3.46066	2.08927	1.6564	small	1.6564				2.84682	2.46651	1.15419	small	1.15419
				13.3804	4.74816	2.81801	medium		2.81801			10.8875	10.9042	0.998467	medium		0.998467			3.74011	2.94415	1.27035	small	1.27035				7.32901	4.36046	1.68079	medium		1.68079			11.5264	6.35489	1.81378	medium		1.81378
				33.6078	14.1744	2.37102	large			2.37102		2.02861	1.93469	1.04855	small	1.04855				4.62663	4.35943	1.06129	medium		1.06129			4.25382	4.66782	0.911308	medium		0.911308			11.1619	6.85158	1.6291	medium		1.6291
				11.8904	5.4776	2.17072	medium		2.17072			3.79627	4.24312	0.894689	small	0.894689				8.81904	4.60961	1.91319	medium		1.91319			17.0495	8.49496	2.00701	large			2.00701		12.4851	6.39157	1.95338	medium		1.95338
				19.4327	6.61432	2.93797	large			2.93797		32.2515	21.0535	1.53188	large			1.53188		6.02937	4.85858	1.24097	medium		1.24097			23.2657	16.5284	1.40762	large			1.40762		1.87973	1.44962	1.29671	small	1.29671
				30.9953	10.681	2.90191	large			2.90191		11.4949	14.6285	0.78579	medium		0.78579			3.64035	4.07238	0.893912	small	0.893912				11.2153	8.85785	1.26615	medium		1.26615			11.4266	6.05574	1.88691	medium		1.88691
				16.0902	6.25454	2.57256	large			2.57256		4.21087	1.01513	4.14812	medium		4.14812			25.6755	16.0974	1.59501	large			1.59501		19.0392	13.112	1.45204	large			1.45204		5.70954	3.71482	1.53696	medium		1.53696
				70.4269	36.5391	1.92744	large			1.92744		4.08138	1.9432	2.10034	medium		2.10034			21.6164	12.1894	1.77339	large			1.77339		5.21535	1.94947	2.67526	medium		2.67526			8.84851	4.66727	1.89586	medium		1.89586
				9.17939	3.52209	2.60624	medium		2.60624			13.2555	7.26399	1.82482	medium		1.82482			3.30686	1.9954	1.65724	small	1.65724				2.34699	1.58275	1.48286	small	1.48286				7.80669	4.3432	1.79745	medium		1.79745
				14.3439	3.71962	3.85627	medium		3.85627			7.41159	4.02048	1.84346	medium		1.84346			11.9571	7.06488	1.69246	medium		1.69246			8.72559	5.61287	1.55457	medium		1.55457			1.1555	1.00843	1.14584	small	1.14584
				8.03061	3.37018	2.38284	medium		2.38284			3.17142	2.16083	1.46768	small	1.46768				6.67183	5.37284	1.24177	medium		1.24177			17.0837	7.06828	2.41695	large			2.41695		6.89048	4.07981	1.68892	medium		1.68892
				4.93865	2.25227	2.19274	medium		2.19274			12.0723	8.06148	1.49753	medium		1.49753			2.21404	2.32475	0.952379	small	0.952379				4.0675	2.58908	1.57102	medium		1.57102			9.2297	5.49603	1.67934	medium		1.67934
				8.22324	2.15915	3.80854	medium		3.80854			5.46138	4.0435	1.35066	medium		1.35066			11.3653	6.49019	1.75115	medium		1.75115			7.16577	3.74287	1.91451	medium		1.91451			5.97585	4.48102	1.33359	medium		1.33359
				7.25666	1.75328	4.1389	medium		4.1389			1.21329	1.66553	0.72847	small	0.72847				8.04099	8.56234	0.939112	medium		0.939112			1.73332	1.52913	1.13354	small	1.13354				2.34598	1.66974	1.405	small	1.405
				14.6063	6.29452	2.32049	medium		2.32049			6.00031	4.0525	1.48064	medium		1.48064			8.58014	6.15239	1.3946	medium		1.3946			13.0273	3.96789	3.28317	medium		3.28317			5.29456	1.13307	4.67275	medium		4.67275
				12.2721	2.20054	5.57687	medium		5.57687			5.66452	2.45702	2.30544	medium		2.30544			4.92461	2.79368	1.76277	medium		1.76277			3.97433	1.69956	2.33844	small	2.33844				14.7783	8.11258	1.82165	medium		1.82165
				7.80403	2.36185	3.30419	medium		3.30419			9.98547	5.27026	1.89468	medium		1.89468			30.2373	20.568	1.47011	large			1.47011		5.14869	3.05347	1.68618	medium		1.68618			4.13627	4.22468	0.979075	medium		0.979075
				4.59935	1.75893	2.61486	medium		2.61486			6.87028	2.55208	2.69204	medium		2.69204			4.52461	2.74655	1.64738	medium		1.64738			2.91878	5.45298	0.535263	small	0.535263				3.85008	3.59206	1.07183	small	1.07183
				22.5756	8.0732	2.79636	large			2.79636		8.1695	6.03423	1.35386	medium		1.35386			18.3038	10.9922	1.66516	large			1.66516		2.7487	6.31377	0.43535	small	0.43535				7.89851	3.36582	2.34668	medium		2.34668
				33.294	11.4189	2.91569	large			2.91569		7.97388	6.3214	1.26141	medium		1.26141			3.91606	1.28656	3.04383	small	3.04383				1.85469	1.34529	1.37866	small	1.37866				3.81868	1.80332	2.11759	small	2.11759
				76.3839	34.5093	2.21343	large			2.21343		7.74738	4.43974	1.74501	medium		1.74501			8.40193	5.49733	1.52837	medium		1.52837			3.98545	1.09443	3.64159	small	3.64159				10.8709	5.893	1.84472	medium		1.84472
				69.6684	35.6061	1.95665	large			1.95665		5.19053	1.96421	2.64255	medium		2.64255			5.29814	3.39859	1.55892	medium		1.55892			2.24785	1.35199	1.66262	small	1.66262				2.23508	1.0089	2.21537	small	2.21537
				12.2771	5.00448	2.45323	medium		2.45323			5.48237	3.4016	1.6117	medium		1.6117			8.13429	6.22551	1.30661	medium		1.30661			1.72136	1.11453	1.54447	small	1.54447				10.799	5.61644	1.92275	medium		1.92275
				10.2776	2.49871	4.11316	medium		4.11316			6.85959	3.90691	1.75576	medium		1.75576			24.4633	16.4956	1.48302	large			1.48302		1.21794	1.30316	0.934606	small	0.934606				3.46213	1.6862	2.05321	small	2.05321
				15.3151	4.80272	3.18883	medium		3.18883			5.68392	3.14094	1.80963	medium		1.80963			1.99128	1.04423	1.90693	small	1.90693				27.5733	13.8675	1.98834	large			1.98834		8.61916	4.87705	1.76729	medium		1.76729
				19.0192	6.09699	3.11945	large			3.11945		6.55073	3.84687	1.70287	medium		1.70287			6.33252	3.3998	1.86262	medium		1.86262			5.77603	2.68292	2.15289	medium		2.15289			2.38891	1.0945	2.18264	small	2.18264
				9.32916	2.82933	3.2973	medium		3.2973			27.3433	19.376	1.4112	large			1.4112		11.5687	6.93496	1.66817	medium		1.66817			8.09995	7.93386	1.02093	medium		1.02093			9.72617	2.86725	3.39216	medium		3.39216
				5.75545	1.56705	3.67281	medium		3.67281			14.622	8.04397	1.81776	medium		1.81776			2.08652	1.60865	1.29706	small	1.29706				5.88885	3.09656	1.90174	medium		1.90174			4.60571	1.89127	2.43524	medium		2.43524
				17.4594	6.11721	2.85414	large			2.85414		9.53049	3.8804	2.45606	medium		2.45606			1.66231	1.21706	1.36584	small	1.36584				17.6025	6.76283	2.60282	large			2.60282		26.1286	9.59794	2.72231	large			2.72231
				8.86131	4.19791	2.11089	medium		2.11089			38.0376	23.2088	1.63893	large			1.63893		8.52816	2.7538	3.09687	medium		3.09687			17.3768	9.69949	1.79152	large			1.79152		3.55475	1.49806	2.3729	small	2.3729
				14.9345	6.63548	2.2507	medium		2.2507			1.0937	1.41637	0.772184	small	0.772184				5.45795	3.97811	1.37199	medium		1.37199			4.74613	2.67526	1.77408	medium		1.77408			14.7949	7.57779	1.95241	medium		1.95241
				42.805	15.4278	2.77454	large			2.77454		17.8976	9.42482	1.89898	large			1.89898		7.56932	4.95043	1.52902	medium		1.52902			6.73586	2.76526	2.43588	medium		2.43588			1.5832	1.0564	1.49867	small	1.49867
				22.7852	9.78086	2.32957	large			2.32957		4.21839	2.46302	1.71269	medium		1.71269			28.2066	17.4685	1.61471	large			1.61471		20.4503	8.51123	2.40274	large			2.40274		8.71336	4.4147	1.97372	medium		1.97372
				23.1677	7.7294	2.99735	large			2.99735		3.39238	2.54707	1.33187	small	1.33187				3.97772	2.4305	1.63659	small	1.63659				10.2358	6.52729	1.56816	medium		1.56816			23.2611	14.5578	1.59785	large			1.59785
				13.1692	4.46504	2.94941	medium		2.94941			8.55321	4.13255	2.06972	medium		2.06972			3.2226	2.02441	1.59187	small	1.59187				7.81705	3.56095	2.19522	medium		2.19522			11.7645	6.10842	1.92595	medium		1.92595
				6.25303	3.25355	1.92191	medium		1.92191			1.93992	1.12019	1.73177	small	1.73177				10.6947	6.16508	1.73473	medium		1.73473			2.75041	2.46557	1.11553	small	1.11553				16.6612	9.84299	1.69269	large			1.69269
				88.187	40.8885	2.15677	large			2.15677		1.83736	1.79611	1.02297	small	1.02297				10.6537	7.335	1.45245	medium		1.45245			13.4811	5.16285	2.61118	medium		2.61118			20.6432	12.6632	1.63017	large			1.63017
				7.03586	2.47332	2.84471	medium		2.84471			7.3716	3.77633	1.95205	medium		1.95205			21.488	15.3589	1.39905	large			1.39905		11.7512	5.50563	2.1344	medium		2.1344			41.8373	25.1994	1.66025	large			1.66025
				5.39955	2.06321	2.61706	medium		2.61706			5.83162	2.9113	2.0031	medium		2.0031			14.8287	8.45477	1.75389	medium		1.75389			6.60082	4.21301	1.56677	medium		1.56677			10.1447	6.0802	1.66848	medium		1.66848
				18.7081	6.12897	3.05241	large			3.05241		5.11886	2.82024	1.81504	medium		1.81504			10.4103	4.9172	2.11713	medium		2.11713			3.28972	2.51631	1.30736	small	1.30736				6.65675	3.71905	1.78991	medium		1.78991
				24.8318	10.9364	2.27057	large			2.27057		6.603	5.24874	1.25802	medium		1.25802			8.01678	6.0557	1.32384	medium		1.32384			66.0586	36.1112	1.82931	large			1.82931		5.10177	3.13488	1.62742	medium		1.62742
				20.1217	6.36929	3.15917	large			3.15917		3.37772	3.37408	1.00108	small	1.00108				7.63389	5.63269	1.35528	medium		1.35528			27.3827	18.0039	1.52093	large			1.52093		8.83897	4.12778	2.14134	medium		2.14134
				10.1938	3.24884	3.13768	medium		3.13768			5.79599	3.98596	1.4541	medium		1.4541			12.1769	7.80757	1.55963	medium		1.55963			25.2281	11.4862	2.19638	large			2.19638		7.73594	4.9603	1.55957	medium		1.55957
				8.83313	2.99347	2.9508	medium		2.9508			1.9609	2.54507	0.770469	small	0.770469				3.29491	1.51559	2.17402	small	2.17402				63.6714	33.1774	1.91912	large			1.91912		8.22008	3.52386	2.33269	medium		2.33269
				3.10277	1.156	2.68406	small	2.68406				3.44979	1.67053	2.06509	small	2.06509				2.98499	3.14418	0.949369	small	0.949369				11.1683	6.35973	1.7561	medium		1.7561			5.81447	3.04927	1.90684	medium		1.90684
				3.30311	1.43019	2.30957	small	2.30957				5.20676	2.18185	2.3864	medium		2.3864			5.75238	4.51352	1.27448	medium		1.27448			41.769	21.8713	1.90977	large			1.90977		1.49496	1.18481	1.26177	small	1.26177
				16.7209	6.16377	2.71278	large			2.71278		7.96636	4.31517	1.84613	medium		1.84613			4.75028	2.77435	1.71222	medium		1.71222			18.3298	1.43338	12.7878	large			12.7878		5.86734	3.04598	1.92626	medium		1.92626
				9.73563	3.90679	2.49198	medium		2.49198			3.97328	2.02375	1.96333	small	1.96333				2.57724	2.33502	1.10373	small	1.10373				16.482	8.64145	1.90731	large			1.90731		6.6651	3.60711	1.84777	medium		1.84777
				11.4322	4.42224	2.58515	medium		2.58515			1.61521	1.80061	0.897034	small	0.897034				2.99984	1.26964	2.36275	small	2.36275				1.46324	1.04368	1.402	small	1.402				11.076	5.32717	2.07916	medium		2.07916
				11.5449	5.04775	2.28714	medium		2.28714			6.82118	4.35769	1.56532	medium		1.56532			17.055	11.1814	1.52531	large			1.52531		4.1487	4.36046	0.951435	medium		0.951435			4.6868	1.90021	2.46646	medium		2.46646
				7.32962	3.08	2.37974	medium		2.37974			9.59701	6.1508	1.56029	medium		1.56029			19.3514	12.0328	1.60822	large			1.60822		2.0829	1.61722	1.28795	small	1.28795				18.9547	9.48365	1.99867	large			1.99867
				6.17389	2.17044	2.84453	medium		2.84453			7.79807	5.05612	1.5423	medium		1.5423			6.94495	3.71887	1.86749	medium		1.86749			4.22305	2.11512	1.9966	medium		1.9966			5.06401	2.03003	2.49456	medium		2.49456
				3.70148	1.36764	2.70648	small	2.70648				9.83579	7.34303	1.33947	medium		1.33947			3.62841	1.25634	2.88807	small	2.88807				9.67259	4.1096	2.35366	medium		2.35366			3.14692	2.31882	1.35712	small	1.35712
				31.6986	11.7575	2.69603	large			2.69603		20.8849	12.8509	1.62516	large			1.62516		14.0626	7.68973	1.82875	medium		1.82875			3.43246	2.98453	1.15008	small	1.15008				4.86249	2.6871	1.80956	medium		1.80956
				11.9981	5.3873	2.2271	medium		2.2271			18.5438	11.8593	1.56365	large			1.56365		7.64616	4.75283	1.60876	medium		1.60876			2.6111	2.47801	1.05371	small	1.05371				6.10782	2.61796	2.33304	medium		2.33304
				7.1092	2.8853	2.46394	medium		2.46394			10.2484	7.00533	1.46294	medium		1.46294			4.64697	2.37792	1.95421	medium		1.95421			13.282	7.67725	1.73004	medium		1.73004			2.54751	1.56485	1.62796	small	1.62796
				6.54408	1.37422	4.76203	medium		4.76203			11.9555	7.30401	1.63684	medium		1.63684			3.69588	2.94899	1.25327	small	1.25327				6.58372	3.68638	1.78596	medium		1.78596			64.6671	39.142	1.65212	large			1.65212
				4.85682	1.97668	2.45706	medium		2.45706			2.93699	3.5572	0.825649	small	0.825649				7.7527	3.1889	2.43115	medium		2.43115			26.9716	15.7155	1.71625	large			1.71625		10.2393	6.66014	1.5374	medium		1.5374
				13.9849	5.37743	2.60066	medium		2.60066			53.768	30.9516	1.73716	large			1.73716		9.48506	5.80371	1.63431	medium		1.63431			19.4409	9.73205	1.99762	large			1.99762		13.6661	6.62628	2.06241	medium		2.06241
				8.97403	3.63402	2.46945	medium		2.46945			5.29784	3.93093	1.34773	medium		1.34773			11.6071	8.72973	1.3296	medium		1.3296			10.2469	4.84209	2.11623	medium		2.11623			2.05104	1.71865	1.1934	small	1.1934
				10.6262	2.92857	3.62845	medium		3.62845			19.3734	13.2757	1.45931	large			1.45931		6.87715	3.64998	1.88416	medium		1.88416			18.5443	10.139	1.82901	large			1.82901		4.62479	2.67488	1.72897	medium		1.72897
				5.8728	1.78668	3.287	medium		3.287			8.12278	5.00659	1.62242	medium		1.62242			4.04649	2.5858	1.56489	medium		1.56489			13.311	5.21743	2.55126	medium		2.55126			5.24169	1.52816	3.43006	medium		3.43006
				10.8369	3.48964	3.10546	medium		3.10546			7.41634	5.21072	1.42329	medium		1.42329			9.64551	5.91067	1.63188	medium		1.63188			5.05381	1.56169	3.23613	medium		3.23613			6.97196	3.62357	1.92406	medium		1.92406
				7.16093	3.02028	2.37095	medium		2.37095			3.14449	4.64036	0.677638	small	0.677638				4.17078	2.04314	2.04136	medium		2.04136			19.752	10.2845	1.92056	large			1.92056		11.0943	5.94286	1.86683	medium		1.86683
				9.58239	3.85835	2.48354	medium		2.48354			8.57895	4.33768	1.97777	medium		1.97777			6.22792	3.24087	1.92168	medium		1.92168			14.7871	8.86264	1.66848	medium		1.66848			5.59466	3.42461	1.63366	medium		1.63366
				8.97442	3.59686	2.49507	medium		2.49507			5.93656	3.03387	1.95676	medium		1.95676			5.41953	2.35677	2.29955	medium		2.29955			6.80594	3.58489	1.89851	medium		1.89851			7.23788	4.71384	1.53545	medium		1.53545
				6.88377	3.51409	1.9589	medium		1.9589			7.89865	4.42323	1.78572	medium		1.78572			2.50105	1.67391	1.49413	small	1.49413				39.1391	25.1593	1.55565	large			1.55565		1.39201	1.23279	1.12916	small	1.12916
				6.21018	1.85346	3.35059	medium		3.35059			5.82172	3.97295	1.46534	medium		1.46534			4.13365	2.17367	1.90169	medium		1.90169			44.01	27.5004	1.60034	large			1.60034		8.83539	3.99609	2.21101	medium		2.21101
				24.7566	8.40711	2.94472	large			2.94472		10.8911	6.9623	1.56429	medium		1.56429			5.88087	3.27592	1.79518	medium		1.79518			2.94015	1.28784	2.28301	small	2.28301				8.62989	5.46922	1.5779	medium		1.5779
				3.49535	1.67945	2.08125	small	2.08125				12.3546	8.47523	1.45773	medium		1.45773			1.86505	2.29514	0.81261	small	0.81261				18.2401	10.4454	1.74623	large			1.74623		4.14462	1.60671	2.57957	medium		2.57957
				15.2938	7.30425	2.09383	medium		2.09383			5.78727	2.53757	2.28064	medium		2.28064			4.62889	1.53674	3.01216	medium		3.01216			7.68884	3.78692	2.03037	medium		2.03037			3.64021	2.50461	1.4534	small	1.4534
				4.66574	2.69483	1.73137	medium		1.73137			5.42218	3.11643	1.73987	medium		1.73987			1.10702	1.1947	0.926608	small	0.926608				3.04357	2.21662	1.37307	small	1.37307				3.87393	2.02862	1.90964	small	1.90964
				7.92601	2.78701	2.84391	medium		2.84391			10.1815	6.71364	1.51654	medium		1.51654			1.13672	1.02429	1.10977	small	1.10977				6.57774	3.92576	1.67553	medium		1.67553			8.21173	4.40482	1.86426	medium		1.86426
				15.8323	7.30002	2.16881	medium		2.16881			1.66194	2.09379	0.793745	small	0.793745				3.73139	1.18201	3.15681	small	3.15681				40.8998	23.7164	1.72454	large			1.72454		5.07673	3.49375	1.45309	medium		1.45309
				7.09376	3.30763	2.14467	medium		2.14467			9.91063	1.18423	8.36884	medium		8.36884			9.00855	6.31374	1.42682	medium		1.42682			8.03841	4.84496	1.65913	medium		1.65913			14.1256	7.07123	1.99761	medium		1.99761
				11.9988	3.75348	3.19672	medium		3.19672			3.19162	3.08991	1.03292	small	1.03292				17.0499	11.0291	1.5459	large			1.5459		4.07604	2.22907	1.82859	medium		1.82859			3.72646	2.95708	1.26018	small	1.26018
				6.05732	2.76349	2.19191	medium		2.19191			2.10544	2.00474	1.05023	small	1.05023				3.21033	2.02078	1.58866	small	1.58866				9.06405	5.04316	1.79729	medium		1.79729			3.68552	1.90821	1.93141	small	1.93141
				15.9917	5.39953	2.96169	medium		2.96169			8.55796	7.7738	1.10087	medium		1.10087			8.93526	5.6629	1.57786	medium		1.57786			3.44699	2.12565	1.62161	small	1.62161				3.6883	2.79011	1.32192	small	1.32192
				6.22292	1.85346	3.35746	medium		3.35746			26.5407	16.1845	1.63988	large			1.63988		2.99758	2.04677	1.46454	small	1.46454				19.346	3.64712	5.30446	large			5.30446		27.6124	19.4433	1.42015	large			1.42015
				9.4909	2.49072	3.81051	medium		3.81051			5.46772	2.69116	2.03173	medium		2.03173			3.33914	1.87575	1.78016	small	1.78016				9.22644	6.5091	1.41747	medium		1.41747			2.54115	1.48395	1.71242	small	1.71242
				15.6212	5.16156	3.02645	medium		3.02645			11.9777	7.41158	1.61607	medium		1.61607			8.83389	5.72515	1.543	medium		1.543			17.0495	12.5739	1.35594	large			1.35594		19.2619	12.0757	1.59509	large			1.59509
				22.7246	23.7055	0.958619	large			0.958619		16.3738	8.06698	2.02974	large			2.02974		12.3157	8.33452	1.47768	medium		1.47768			9.41533	5.82544	1.61624	medium		1.61624			3.82981	2.189	1.74957	small	1.74957
				7.80711	1.27546	6.12103	medium		6.12103			24.6071	12.5828	1.95562	large			1.95562		7.6778	4.95648	1.54904	medium		1.54904			6.16235	5.22796	1.17873	medium		1.17873			1.98427	1.59495	1.24409	small	1.24409
				5.97471	1.27075	4.7017	medium		4.7017			5.5481	4.00247	1.38617	medium		1.38617			6.50137	4.17934	1.55559	medium		1.55559			7.27688	2.61589	2.78179	medium		2.78179			13.5111	6.23401	2.16732	medium		2.16732
				11.5005	4.06858	2.82666	medium		2.82666			11.5405	6.52453	1.76879	medium		1.76879			4.29895	2.35798	1.82315	medium		1.82315			7.57431	4.03779	1.87586	medium		1.87586			8.36755	5.1522	1.62407	medium		1.62407
				5.14092	1.91695	2.68182	medium		2.68182			3.73807	1.97022	1.89729	small	1.89729				19.7579	9.99755	1.97627	large			1.97627		6.69312	6.01981	1.11185	medium		1.11185			12.0093	5.65642	2.12314	medium		2.12314
				4.36426	1.04125	4.19138	medium		4.19138			21.7552	13.8651	1.56907	large			1.56907		15.8647	9.78182	1.62186	medium		1.62186			16.423	9.55396	1.71897	large			1.71897		9.12635	5.39443	1.69181	medium		1.69181
				20.7165	6.55036	3.16266	large			3.16266		10.1276	7.15692	1.41508	medium		1.41508			3.92962	2.78522	1.41088	small	1.41088				4.91279	4.67931	1.0499	medium		1.0499			7.07491	4.08216	1.73313	medium		1.73313
				14.0227	4.14759	3.38093	medium		3.38093			2.07455	1.18923	1.74444	small	1.74444				7.67974	4.47122	1.71759	medium		1.71759			6.81876	3.58201	1.90361	medium		1.90361			6.06211	3.01682	2.00944	medium		2.00944
				6.74751	2.32329	2.90429	medium		2.90429			5.94646	3.47214	1.71262	medium		1.71262			3.85956	2.09753	1.84005	small	1.84005				8.34013	2.98932	2.78997	medium		2.78997			18.7138	9.34631	2.00227	large			2.00227
				8.60616	3.21874	2.67376	medium		2.67376			4.8975	2.78922	1.75587	medium		1.75587			1.75303	1.27447	1.37549	small	1.37549				21.5537	11.3349	1.90153	large			1.90153		13.4991	7.0637	1.91106	medium		1.91106
				17.2258	6.18164	2.78661	large			2.78661		2.17156	1.06516	2.03872	small	2.03872				18.9353	11.095	1.70665	large			1.70665		4.98715	1.61626	3.08561	medium		3.08561			4.23088	1.90444	2.22158	medium		2.22158
				7.48556	2.44745	3.05851	medium		3.05851			4.65556	2.64914	1.75739	medium		1.75739			10.1701	6.24726	1.62793	medium		1.62793			2.65896	1.56935	1.69431	small	1.69431				16.3988	8.685	1.88818	large			1.88818
				7.45932	2.16103	3.45173	medium		3.45173			5.99239	3.57521	1.6761	medium		1.6761			2.30315	1.57662	1.46081	small	1.46081				7.8085	4.69942	1.66159	medium		1.66159			3.8151	1.9797	1.92711	small	1.92711
				3.34055	1.44006	2.31973	small	2.31973				1.79657	2.24088	0.801723	small	0.801723				5.16674	2.56526	2.01412	medium		2.01412			7.96234	5.1753	1.53853	medium		1.53853			5.36929	3.6278	1.48004	medium		1.48004
				4.228	1.50073	2.81729	medium		2.81729			4.95373	2.92981	1.6908	medium		1.6908			6.2602	3.60828	1.73495	medium		1.73495			4.76835	2.3995	1.98723	medium		1.98723			43.7191	26.0122	1.68071	large			1.68071
				43.7468	17.9284	2.44009	large			2.44009		12.2418	4.95756	2.46931	medium		2.46931			23.5299	14.502	1.62253	large			1.62253		5.94099	3.77352	1.57439	medium		1.57439			7.11267	3.96551	1.79363	medium		1.79363
				5.07839	2.46015	2.06426	medium		2.06426			7.50544	5.93316	1.265	medium		1.265			6.95173	5.3535	1.29854	medium		1.29854			11.364	8.82146	1.28823	medium		1.28823			8.35284	4.19222	1.99246	medium		1.99246
				1.77836	1.05724	1.68208	small	1.68208				3.10806	2.30643	1.34757	small	1.34757				4.58595	4.67729	0.980472	medium		0.980472			1.52734	1.28401	1.18951	small	1.18951				22.7646	12.0494	1.88927	large			1.88927
				24.8515	9.81801	2.53122	large			2.53122		5.67362	3.06239	1.85268	medium		1.85268			2.72252	1.70715	1.59477	small	1.59477				17.9392	9.73684	1.84241	large			1.84241		15.8721	7.81485	2.03102	medium		2.03102
				8.71347	2.6525	3.285	medium		3.285			3.40188	2.45702	1.38456	small	1.38456				12.4136	8.94607	1.3876	medium		1.3876			2.36494	2.57089	0.91989	small	0.91989				7.32096	4.81214	1.52135	medium		1.52135
				7.65502	2.16621	3.53383	medium		3.53383			7.64403	3.69378	2.06943	medium		2.06943			8.34898	5.11057	1.63367	medium		1.63367			4.08032	1.89202	2.15659	medium		2.15659			5.80335	2.98766	1.94244	medium		1.94244
				12.6018	4.83141	2.6083	medium		2.6083			10.3015	6.85573	1.50261	medium		1.50261			9.95415	4.61867	2.1552	medium		2.1552			4.36151	3.46903	1.25727	medium		1.25727			8.68157	4.29805	2.01989	medium		2.01989
				12.1613	4.36863	2.78379	medium		2.78379			2.00406	1.27829	1.56777	small	1.56777				7.97449	6.30104	1.26558	medium		1.26558			11.5093	3.63755	3.16403	medium		3.16403			81.2488	49.6848	1.63528	large			1.63528
				4.84871	1.13108	4.28682	medium		4.28682			4.58349	2.41749	1.89597	medium		1.89597			11.2978	7.77856	1.45243	medium		1.45243			2.46323	3.32349	0.741159	small	0.741159				1.73663	1.14248	1.52006	small	1.52006
				3.654	2.07215	1.76339	small	1.76339				7.40327	4.44274	1.66637	medium		1.66637			2.03293	1.40742	1.44444	small	1.44444				10.6504	4.47153	2.38181	medium		2.38181			6.64324	3.61134	1.83955	medium		1.83955
				7.83722	2.05381	3.81595	medium		3.81595			3.68936	4.22461	0.873303	small	0.873303				18.8152	11.6177	1.61953	large			1.61953		3.70169	1.5569	2.3776	small	2.3776				2.77766	1.63493	1.69894	small	1.69894
				21.8858	11.3103	1.93503	large			1.93503		7.05798	5.11916	1.37874	medium		1.37874			8.99596	5.66713	1.58739	medium		1.58739			2.51281	1.28209	1.95992	small	1.95992				5.31642	4.22138	1.2594	medium		1.2594
				36.7411	14.1641	2.59397	large			2.59397		8.08951	5.3478	1.51268	medium		1.51268			4.06876	1.80444	2.25486	medium		2.25486			7.46833	3.26795	2.28532	medium		2.28532			1.66111	1.02771	1.61631	small	1.61631
				14.3728	4.74675	3.02792	medium		3.02792			11.902	6.6361	1.79353	medium		1.79353			12.1382	7.13498	1.70122	medium		1.70122			6.37773	1.74074	3.66381	medium		3.66381			3.52335	1.01925	3.45681	small	3.45681
				8.94431	4.17534	2.14218	medium		2.14218			5.61186	3.36508	1.66767	medium		1.66767			53.641	39.3503	1.36317	large			1.36317		10.7059	5.33041	2.00846	medium		2.00846			25.7927	16.5078	1.56245	large			1.56245
				8.8092	3.73325	2.35966	medium		2.35966			7.95171	4.65387	1.70862	medium		1.70862			1.75432	1.74583	1.00486	small	1.00486				9.44182	5.84555	1.61522	medium		1.61522			5.52232	2.62643	2.1026	medium		2.1026
				28.9884	10.1223	2.86382	large			2.86382		26.5387	17.1041	1.5516	large			1.5516		4.80774	2.93146	1.64005	medium		1.64005			5.30595	2.07395	2.55838	medium		2.55838			11.935	6.31302	1.89054	medium		1.89054
				13.6085	4.35593	3.12413	medium		3.12413			3.35991	2.00123	1.67892	small	1.67892				18.36	10.2508	1.79108	large			1.79108		6.93329	1.79914	3.85366	medium		3.85366			4.36801	2.17866	2.00491	medium		2.00491
				5.9033	1.71848	3.43518	medium		3.43518			16.7381	9.34627	1.79089	large			1.79089		4.55012	3.80891	1.1946	medium		1.1946			2.96323	2.63888	1.12291	small	1.12291				40.9808	24.881	1.64707	large			1.64707
				5.67053	2.24005	2.53144	medium		2.53144			8.32037	5.56594	1.49487	medium		1.49487			6.98401	5.05377	1.38194	medium		1.38194			19.8589	9.73684	2.03956	large			2.03956		5.82123	2.80187	2.07762	medium		2.07762
				1.82816	1.21526	1.50434	small	1.50434				5.8736	3.77533	1.55578	medium		1.55578			18.3761	10.6442	1.7264	large			1.7264		5.19142	2.95198	1.75862	medium		1.75862			3.51261	2.35551	1.49123	small	1.49123
				36.1972	14.7623	2.452	large			2.452		15.2402	12.069	1.26276	medium		1.26276			6.24858	4.37876	1.42702	medium		1.42702			9.55208	4.20918	2.26935	medium		2.26935			5.94167	3.74586	1.5862	medium		1.5862
				6.71547	2.32611	2.88699	medium		2.88699			11.4383	4.27214	2.67743	medium		2.67743			10.3422	6.55666	1.57736	medium		1.57736			3.90169	2.68579	1.45271	small	1.45271				7.92355	4.04547	1.95862	medium		1.95862
				30.2904	12.5942	2.40511	large			2.40511		15.1455	9.99417	1.51543	medium		1.51543			39.3772	18.7116	2.10443	large			2.10443		16.7555	9.66598	1.73345	large			1.73345		3.32182	2.32399	1.42936	small	1.42936
				16.3071	7.02066	2.32273	large			2.32273		46.6253	32.1604	1.44977	large			1.44977		7.46182	4.85012	1.53848	medium		1.53848			5.82817	4.87177	1.19632	medium		1.19632			2.68226	1.1152	2.40519	small	2.40519
				9.24308	4.64705	1.98902	medium		1.98902			48.524	32.5866	1.48908	large			1.48908		3.60193	2.32112	1.55181	small	1.55181				7.20081	3.51882	2.04637	medium		2.04637			9.42209	4.07416	2.31264	medium		2.31264
				3.59069	2.06462	1.73915	small	1.73915				5.2226	3.28703	1.58885	medium		1.58885			10.1785	5.70823	1.78313	medium		1.78313			5.70253	1.3721	4.15606	medium		4.15606			3.9415	2.56811	1.53479	small	1.53479
				5.47559	3.33867	1.64005	medium		1.64005			7.86262	4.40471	1.78505	medium		1.78505			5.32784	3.63124	1.46722	medium		1.46722			4.09826	1.10017	3.72512	medium		3.72512			4.1005	2.10246	1.95033	medium		1.95033
				70.4466	28.9974	2.42941	large			2.42941		7.89667	2.17584	3.62924	medium		3.62924			4.97788	2.91575	1.70724	medium		1.70724			12.2213	5.28541	2.31227	medium		2.31227			30.3364	13.7229	2.21064	large			2.21064
				45.2728	20.1835	2.24306	large			2.24306		8.12475	4.81798	1.68634	medium		1.68634			5.5138	4.19022	1.31587	medium		1.31587			5.27262	3.17125	1.66263	medium		1.66263			13.2642	6.94941	1.90868	medium		1.90868
				8.09971	2.07215	3.90885	medium		3.90885			6.45173	5.10065	1.26488	medium		1.26488			14.1091	9.36666	1.50631	medium		1.50631			7.60337	3.29572	2.30704	medium		2.30704			4.7814	2.86584	1.66841	medium		1.66841
				18.1252	6.54754	2.76825	large			2.76825		7.09639	3.75682	1.88894	medium		1.88894			10.082	5.88408	1.71344	medium		1.71344			3.69912	1.47934	2.50052	small	2.50052				15.3284	8.41266	1.82206	medium		1.82206
				10.0128	2.90364	3.44836	medium		3.44836			2.93145	3.15845	0.92813	small	0.92813				5.24035	2.85653	1.83452	medium		1.83452			5.03672	3.31009	1.52163	medium		1.52163			19.2512	11.2338	1.71368	large			1.71368
				7.203	2.27767	3.16244	medium		3.16244			7.38189	3.03287	2.43396	medium		2.43396			13.4308	9.19625	1.46047	medium		1.46047			7.97944	2.77484	2.87564	medium		2.87564			21.253	11.0438	1.92443	large			1.92443
				77.6349	31.1763	2.49019	large			2.49019		6.27037	1.44289	4.3457	medium		4.3457			5.50024	4.39327	1.25197	medium		1.25197			10.182	1.30124	7.82482	medium		7.82482			12.3945	7.26172	1.70683	medium		1.70683
				8.57759	2.3802	3.60373	medium		3.60373			1.72371	1.47591	1.16789	small	1.16789				3.65165	2.70183	1.35155	small	1.35155				7.74012	3.32923	2.3249	medium		2.3249			35.9247	20.7353	1.73253	large			1.73253
				15.8273	8.195	1.93134	medium		1.93134			1.63501	1.33232	1.22719	small	1.22719				4.79289	3.20944	1.49337	medium		1.49337			5.9333	3.23157	1.83604	medium		1.83604			17.5678	10.4775	1.67672	large			1.67672
				16.6418	4.4467	3.7425	large			3.7425		4.85593	1.41938	3.42117	medium		3.42117			5.77788	2.87103	2.01247	medium		2.01247			2.63503	4.55292	0.578756	small	0.578756				6.75692	4.91421	1.37498	medium		1.37498
				11.228	3.91855	2.86533	medium		2.86533			2.55567	3.241	0.788542	small	0.788542				5.48991	4.27241	1.28497	medium		1.28497			3.24186	1.37689	2.35449	small	2.35449				1.38724	1.30804	1.06055	small	1.06055
				8.33672	2.70564	3.08123	medium		3.08123			5.37545	3.70579	1.45056	medium		1.45056			9.77949	6.61105	1.47926	medium		1.47926			1.42734	1.37306	1.03954	small	1.03954				7.39886	3.20637	2.30755	medium		2.30755
				8.22941	2.31953	3.54788	medium		3.54788			4.73673	1.54545	3.06495	medium		3.06495			1.7611	1.23398	1.42716	small	1.42716				2.65725	1.02931	2.58157	small	2.58157				15.7064	8.43947	1.86106	medium		1.86106
				7.26978	2.45827	2.95728	medium		2.95728			5.34892	3.25851	1.64152	medium		1.64152			5.05407	2.16461	2.33487	medium		2.33487			11.9316	3.36466	3.54614	medium		3.54614			5.90272	3.25011	1.81616	medium		1.81616
				6.02335	2.08532	2.88846	medium		2.88846			9.22281	5.60196	1.64635	medium		1.64635			7.19031	3.79199	1.89618	medium		1.89618			9.41105	3.785	2.4864	medium		2.4864			7.61152	5.10846	1.48998	medium		1.48998
				8.38034	2.94127	2.84923	medium		2.84923			24.581	18.6085	1.32095	large			1.32095		7.69814	5.22781	1.47254	medium		1.47254			6.61278	2.26449	2.9202	medium		2.9202			3.86042	1.70125	2.26916	small	2.26916
				14.2555	4.90054	2.90896	medium		2.90896			5.31051	2.88528	1.84055	medium		1.84055			2.87619	1.83285	1.56925	small	1.56925				4.27861	1.25624	3.40588	medium		3.40588			13.2952	7.13943	1.86223	medium		1.86223
				22.7543	9.25459	2.4587	large			2.4587		29.5288	18.7266	1.57684	large			1.57684		4.50976	1.85943	2.42534	medium		2.42534			15.9589	9.1068	1.75241	medium		1.75241			7.55667	1.92326	3.9291	medium		3.9291
				10.1047	3.24461	3.11429	medium		3.11429			8.37106	6.06575	1.38005	medium		1.38005			15.7246	11.4388	1.37467	medium		1.37467			16.7879	8.02099	2.093	large			2.093		4.00311	3.20167	1.25032	medium		1.25032
				7.79206	3.59451	2.16776	medium		2.16776			27.4364	17.4608	1.57132	large			1.57132		5.45246	1.52888	3.5663	medium		3.5663			3.90253	2.51153	1.55385	small	1.55385				12.3409	6.84687	1.80241	medium		1.80241
				17.01	4.91794	3.45877	large			3.45877		29.5913	20.974	1.41086	large			1.41086		3.61033	1.91563	1.88466	small	1.88466				9.68541	4.41504	2.19373	medium		2.19373			4.49521	1.34614	3.33933	medium		3.33933
[truncated: 2,603 more rows]

## Sheet: nc7
avg 5':3' ratio of small (<8), medium (<32), large (>32)				nc7_1								nc7_2								nc7_3								nc7_4								nc7_5
[truncated: 3,117 more rows]

[truncated: 1 more sheets: nc8]
