# Supplementary material for: Compartmentalized oskar degradation in the germ plasm safeguards germline development
Source: eLife journal article supplement (doi:10.7554/elife.49988), 2020-01-07
Supplement: supp [file elife-49988-supp-v1.zip › elife_poa_e49988_Figure_5_source_data_4.xlsx]

## Sheet: Sheet1
Figure 5 G,H
		sizes of oskar particles colocalized with DCP1 (number of transcripts)										sizes of all oskar particles (number of transcripts)
			nc4	nc5	nc6	nc7	nc8	nc9	nc10	nc11			nc4	nc5	nc6	nc7	nc8	nc9	nc10	nc11
		x <= 2	210	302	276	887	488	758	1375	1455		x <= 2	1347	1742	1684	3199	2654	4553	7625	6941
		2 < x <= 4	352	491	552	996	791	1063	1840	1805		2 < x <= 4	2281	2660	2825	3992	3233	4580	6626	5708
		4 < x <= 8	673	990	961	1212	1198	1261	1389	1276		4 < x <= 8	3220	3784	3812	4403	2980	3162	2890	2041
		8 < x <= 16	821	1214	1424	1229	1125	1258	929	633		8 < x <= 16	2707	3206	3983	3368	1950	2086	1289	757
		16 < x <= 32	580	790	1292	801	689	920	386	164		16 < x <= 32	1151	1321	2339	1411	904	1127	454	186
		32 < x	350	264	770	522	277	487	52	11		32 < x	434	318	972	606	322	534	62	11
		Total	2986	4051	5275	5647	4568	5747	5971	5344
													11140	13031	15615	16979	12043	16042	18946	15644
			oskar particles colocalized with DCP1										all oskar particles
			nc4	nc5	nc6	nc7	nc8	nc9	nc10	nc11			nc4	nc5	nc6	nc7	nc8	nc9	nc10	nc11
			1.8707	6.36472	55.4655	15.1422	10.6783	33.3184	6.23574	3.84166			3.69631	7.6954	5.67169	1.72635	3.72858	7.21227	1.77432	2.12433
			14.6793	9.18787	48.9554	14.1647	12.8035	34.5285	1.49066	3.60578			2.02821	14.0733	2.00828	12.0856	1.56914	10.9082	1.69873	1.54172
			2.43986	91.6846	118.022	28.5539	11.9686	3.38913	2.46276	6.89757			5.51189	1.62139	23.4616	12.0218	3.30103	2.86308	2.23274	2.32598
			19.2583	9.52054	24.1859	8.33992	17.9168	8.51028	1.66297	2.42122			6.8478	8.17267	19.7209	4.52273	8.22224	11.0289	6.23736	5.70036
			18.0914	10.0731	10.6032	6.0352	5.72625	6.27132	1.8174	2.56408			1.91939	4.20793	13.1654	13.4973	4.33717	2.15498	2.01328	1.38026
			5.05155	13.1157	1.2363	18.0259	25.3148	1.51829	4.76133	8.43631			2.25015	17.7903	4.25919	5.56171	3.12336	2.25104	4.45979	1.53651
			3.02764	5.82022	9.49976	20.2105	34.0772	46.5913	2.0653	3.20845			3.28394	9.13074	5.40378	14.4197	1.82625	2.67248	1.30047	3.44358
			4.9728	7.58367	2.482	27.4523	1.66737	103.166	15.9673	12.6195			2.66466	6.47443	28.4574	5.01907	13.3211	2.7625	3.53402	1.97254
			18.7178	4.89248	25.4735	63.4876	36.9112	4.57198	11.2157	4.54183			7.34536	6.25299	3.5161	4.50164	2.02125	20.6315	3.08454	1.74039
			8.61112	5.54973	17.704	23.9234	9.0345	23.0756	18.5528	2.93612			4.34708	13.8068	22.2174	1.2306	7.24917	13.0501	8.63266	2.14665
			3.08634	12.9721	4.75169	21.6046	16.2177	1.86329	6.16421	14.7959			8.89534	6.31972	10.3916	7.66016	1.99237	3.11705	2.60337	2.31556
			6.99313	8.5109	5.7663	7.06889	3.03862	4.059	8.97484	1.89888			6.2543	20.8106	5.12575	4.53211	1.42085	1.26684	18.1041	1.71732
			6.4118	14.1238	18.1799	12.2497	3.38144	2.15448	6.55191	3.27914			5.46965	7.55687	9.2889	1.02725	1.82529	2.84347	14.7595	1.16001
			5.90493	58.8053	36.6573	1.03077	10.5829	2.28825	3.98268	3.28137			1.77978	18.7539	22.3098	4.06624	2.23455	1.45593	2.7895	1.54693
			9.62486	12.9499	1.87684	18.4929	7.41094	19.691	35.3556	1.38547			6.64304	20.5452	23.4421	24.2761	1.84937	2.97523	7.66787	3.45027
			21.0646	6.36118	2.0906	14.0048	20.6998	2.59653	5.22706	2.12731			2.65249	8.14992	4.77191	20.1806	3.14118	1.87938	1.39963	3.45995
			19.8969	14.9666	4.01655	9.27635	18.85	51.6888	20.6742	1.07816			5.65364	3.52843	48.4831	6.60596	2.82292	8.42026	5.40994	3.03062
			8.03051	3.78425	2.3809	9.51602	15.9264	195.528	31.7769	2.3297			15.741	7.38548	1.79741	18.1185	1.11463	1.50974	1.82147	2.39592
			16.3481	40.0489	51.2063	16.6974	25.0505	11.5358	3.2853	21.8125			1.9065	3.3712	5.74246	7.20778	9.86361	1.27991	16.3265	3.38703
			12.0382	4.86771	23.1829	36.4491	20.031	3.04061	2.13114	3.02243			14.9542	4.36516	31.9677	53.4548	9.57712	18.3528	4.18181	1.77611
			16.3746	6.89255	15.942	10.1958	28.4974	2.76803	7.71989	4.97042			5.43743	4.24686	10.8624	1.86641	3.32125	2.81882	1.38499	7.56054
			23.2524	11.9286	14.6501	27.4317	9.55979	5.2665	6.42268	7.00769			21.5392	6.41528	3.95083	2.27133	2.09155	1.80898	4.17775	2.0715
			6.75473	19.3217	81.1592	24.2656	17.017	19.5407	7.41428	4.29926			12.3425	10.0029	36.263	1.4439	2.06411	12.777	1.7093	7.41545
			30.2406	10.4538	3.89884	14.7888	11.6355	14.0725	13.151	9.65734			2.66967	29.7806	21.0815	10.034	2.184	3.29408	2.08481	1.49336
			16.2042	3.8429	58.1814	18.684	27.234	1.5716	17.4905	2.54771			5.58348	5.36974	27.7591	2.61707	1.52485	1.04757	2.22217	2.96142
			8.81014	67.0781	28.0805	24.4262	3.35495	7.97317	4.17693	8.67293			9.64562	3.00667	13.0751	16.1689	10.5146	1.25477	4.08428	2.35202
			22.5143	7.21258	35.9417	6.10141	33.3507	13.9875	50.8954	4.58499			10.7238	10.7001	26.2939	36.4737	1.9394	1.42374	3.55759	1.77611
			10.3336	25.9973	31.6652	1.43452	9.84386	8.1678	60.8171	10.0844			6.27219	3.63814	15.1036	17.3344	3.71414	2.30937	2.35872	2.51274
			10.189	11.1905	25.0966	22.3002	18.6044	13.4509	11.7335	2.42494			1.47623	28.2456	9.84928	8.59015	9.61227	1.07623	1.52561	2.00603
			7.37615	14.0712	9.27518	32.5645	8.66135	73.7048	6.24712	11.0986			5.58491	22.4178	14.6508	3.43512	3.1147	3.2297	5.10433	1.17341
			13.1866	20.6468	104.873	121.704	8.97672	14.5694	3.43973	14.4752			19.2834	2.75742	1.07527	27.529	21.3103	7.64678	2.56436	2.09383
			4.89332	22.7657	84.32	25.5507	7.46343	54.6726	2.7391	12.7423			9.47953	2.45863	2.65676	2.75595	1.04963	1.00733	2.45382	1.4249
			4.53107	11.8968	2.6387	55.4917	2.8701	5.22073	2.82526	2.25901			12.079	9.56452	3.81868	1.51891	1.61681	19.0362	3.24466	2.49637
			22.5866	28.7204	113.219	7.29626	7.37483	34.5269	3.28855	5.47788			13.4579	1.50764	14.0117	4.64755	1.53977	1.59524	2.10188	2.42866
			9.7165	27.3518	40.0947	1.41694	9.06435	19.4607	4.47929	2.91677			5.67512	3.32367	2.01116	21.2471	2.13874	1.56255	3.30969	1.53949
			12.1005	5.70393	22.1863	16.7232	1.35248	6.04601	2.15715	1.52758			4.74442	1.18811	3.53704	6.28542	2.57159	21.7002	9.14472	1.09007
			9.28551	8.29451	35.6181	11.1621	7.96224	25.046	17.1117	1.93608			4.71721	4.20793	35.3358	4.21801	1.27833	62.342	2.49527	3.65043
			18.4973	7.67012	62.2298	9.35429	12.6995	5.81316	2.99026	4.37069			10.4518	2.12646	47.9234	38.6061	1.84311	3.25133	1.54512	1.15034
			29.2419	9.36887	39.2195	2.31293	1.12618	16.2828	5.06857	2.81111			8.12715	8.0938	16.9046	12.2515	4.32273	2.5895	1.3533	2.58566
			5.6651	8.86885	14.619	1.26927	27.4396	10.9791	1.51342	3.46813			2.90593	2.66844	2.84668	16.03	4.35355	1.80696	3.82662	1.44871
			4.26905	6.60386	13.3033	19.5723	33.5616	4.70173	1.75807	1.20168			10.3537	33.4723	5.00877	1.82714	10.7702	1.26885	2.42293	1.82447
			8.38703	2.32869	6.7383	1.83652	10.5136	8.49268	8.60339	1.79173			5.61068	9.84209	37.9976	13.8805	3.09784	6.43929	2.79682	2.10871
			8.17369	18.4101	7.29146	14.9734	4.52447	30.1722	2.48551	1.58488			4.00773	1.17143	4.49749	13.2342	2.07277	7.52759	3.56409	1.26344
			19.5218	13.3169	29.8208	53.8562	6.0811	11.9819	1.78977	3.44879			19.4237	11.7931	2.56432	2.88721	2.29762	1.18888	1.57031	2.53432
			30.4969	14.3114	26.2354	30.2357	3.35785	4.02129	1.31428	1.25972			10.4804	1.07334	4.52349	13.0982	12.3389	1.99153	4.37363	1.256
			5.75745	5.121	13.0411	35.9322	5.01702	23.5388	8.67574	1.97626			9.2626	1.71694	14.4197	33.2407	1.36741	1.72499	2.54973	1.46285
			36.9667	10.422	32.7079	7.2986	14.6611	12.0236	4.75808	1.39812			7.59164	4.86568	35.46	8.11432	4.64484	1.82909	3.06016	2.16079
			25.0029	3.22761	2.02416	41.5145	19.5004	10.4591	13.815	7.12674			13.5825	7.02601	25.3009	5.24996	2.72229	13.6284	1.79383	1.05807
			11.5392	14.6966	2.70731	5.91507	38.2315	30.2758	2.58712	21.6697			10.101	8.38855	14.2377	1.12981	1.81807	2.98428	5.74887	1.14215
			13.6841	9.84613	4.58054	18.3371	1.48874	2.51808	1.38418	20.7827			4.0199	6.80458	12.067	1.23821	2.59133	3.88751	7.54189	2.32077
			41.1061	7.90775	15.2531	3.78965	14.7299	1.06668	3.34626	11.464			1.25644	1.19771	25.5652	28.1976	1.62789	10.283	13.6281	2.18535
			6.70677	27.6961	24.6488	48.4743	6.9285	2.49595	1.89462	23.4979			17.1843	5.84246	1.74108	19.4387	1.88789	7.61107	14.1401	1.90185
			10.9472	1.09205	29.6627	41.2988	34.0493	8.64204	8.39695	18.3615			14.9714	1.64161	2.00683	3.74628	5.8755	20.5062	2.94718	1.72253
			7.8866	5.8556	39.7531	47.0228	9.20205	14.5322	20.8262	16.4582			5.79325	12.2684	3.75874	50.3929	7.40709	4.07007	10.2794	3.5604
			22.4943	11.3876	24.4047	9.83539	5.57169	20.0908	4.69956	39.0818			8.6011	22.6276	18.8089	2.99796	6.71521	1.89699	9.73643	6.8559
			16.2765	1.44848	65.1385	56.3326	17.4739	20.5399	4.7719	8.16026			10.388	9.64744	20.1542	14.3089	2.55329	2.26914	6.29182	1.49782
			6.24857	3.77768	5.57998	31.8314	9.61853	22.0517	2.95612	2.21511			3.1565	5.7287	16.5161	2.19222	4.99247	3.33582	1.93526	1.21284
			16.2786	25.7021	38.6699	72.6063	17.0844	25.7994	34.9655	13.6344			4.60911	3.10273	3.82301	8.44657	3.48688	2.06798	2.55867	1.57149
			3.52663	18.4359	60.6504	59.4999	33.6767	7.84342	9.3471	15.2439			10.7496	19.442	35.1777	11.9585	1.2817	3.89606	10.3582	1.25451
			7.91381	15.6289	44.1575	45.1465	29.3255	10.1538	4.0859	2.02686			5.93428	6.70093	23.4934	6.23267	1.56288	2.2279	8.96671	1.92492
			9.1273	7.07202	54.3202	8.27664	30.236	19.1207	32.801	6.9504			21.2772	8.41939	21.7112	6.18228	11.1415	25.5902	10.5045	3.3967
			7.48282	21.5204	54.3873	54.3103	25.0952	7.34252	8.63672	9.5874			15.2592	1.39085	2.50077	6.50809	7.36135	2.04484	2.09619	1.89441
			22.4306	10.283	97.5136	17.4188	24.9561	3.92171	4.48823	5.96599			2.03751	1.5137	14.5901	3.86876	2.88262	1.18888	2.76105	3.12139
			1.08319	11.0206	80.2977	20.1033	39.3591	8.21708	13.0258	4.03809			5.69731	1.87216	3.63526	7.40291	11.0923	12.0161	4.05095	8.13869
			11.482	13.9631	154.379	15.8753	23.0172	56.0435	2.50746	1.77908			9.78451	5.45519	14.879	6.32761	2.64573	1.46448	2.63832	1.40556
			8.05986	17.1644	32.921	15.2424	47.98	19.694	8.51805	2.50158			1.03451	7.9856	1.68909	12.756	1.04529	7.25702	2.36278	1.50749
			3.11069	13.3407	25.3399	62.8823	21.5694	2.38733	6.16502	16.2744			16.3774	9.67272	2.07399	9.38066	11.986	8.54699	3.37715	1.86688
			23.5052	8.03718	21.9849	5.64785	46.4027	35.1878	9.26013	13.159			6.92869	5.69382	34.4013	29.5894	28.7087	4.55689	3.9079	1.8654
			7.87872	19.3995	15.7087	42.5511	5.36321	30.9829	21.1114	9.76746			16.0739	10.7779	2.26752	8.51983	8.03543	2.98026	1.07695	1.78652
			1.1018	17.5982	10.9224	14.422	45.678	16.4146	2.27825	2.198			15.8699	12.0029	9.31634	13.6098	5.12728	13.29	12.3528	2.52316
			6.77621	10.5959	18.9035	2.6827	43.1666	15.9534	2.96181	4.97637			4.46162	6.17109	2.23069	6.10727	7.72391	4.28179	3.47956	3.30667
			12.7513	54.9219	28.1158	15.3332	16.133	1.22157	54.583	3.53435			10.4711	10.8386	4.33718	4.56024	2.60481	1.8648	5.17017	1.90409
			11.86	25.3805	27.7959	13.72	6.27995	11.3719	19.2233	8.20491			9.29339	14.4034	21.3458	2.15647	17.29	14.7831	2.14577	2.01123
			22.3439	50.7615	27.6775	29.7623	11.9508	61.484	12.1504	14.9462			1.91724	7.98712	4.90839	38.4731	1.37077	3.02552	2.41236	3.85059
			25.4768	14.5288	7.59331	29.7998	2.25381	45.5126	3.68032	1.16522			7.62958	9.72125	9.4095	1.00616	4.76665	1.39608	4.75239	2.81632
			16.172	18.9031	50.022	32.1203	2.25718	59.3477	15.3691	1.24484			14.1638	5.8642	2.85462	11.0332	1.14063	1.15368	3.85507	2.36244
			8.50874	35.7494	24.0812	8.83978	7.45043	19.6473	3.38528	2.9004			12.0046	5.9001	23.5909	4.00295	1.70203	3.07481	2.28557	3.10353
			33.6376	40.3335	5.871	18.2099	4.0998	6.56653	3.62749	2.84832			19.292	8.82234	3.42223	6.81926	1.09633	1.8482	1.82472	2.48893
			11.434	9.82439	110.032	10.5222	3.47292	32.118	2.76837	3.35652			6.82202	16.8297	34.545	16.6798	1.94133	4.30191	5.99271	2.78358
			13.0584	15.1648	20.5832	27.2653	1.30289	7.24143	4.34356	2.21883			4.07145	1.86305	2.54771	3.88458	1.87488	4.43418	2.25306	2.02165
			29.3349	19.4046	42.0221	10.6634	7.24628	23.1833	19.0535	1.98296			4.17669	4.24938	9.61603	27.8039	1.69192	3.48569	9.12683	3.38331
			20.8391	25.3128	52.7018	53.9323	19.4754	12.5441	1.35249	1.43904			9.72939	11.5535	2.53833	5.46795	1.5547	10.1297	4.75564	1.66673
			33.8187	2.62344	21.0064	2.14475	16.1233	19.3475	13.5192	2.38029			7.45848	13.1405	12.1731	3.20014	8.58913	9.10422	3.70633	1.67566
			14.3614	2.87724	11.5521	22.9213	49.2434	11.4297	3.33082	1.16522			11.6803	7.29549	2.92756	12.2181	12.8151	1.0873	6.17071	1.73965
			2.94602	14.4044	17.9553	4.79698	54.4573	17.957	10.7093	1.56851			7.75702	4.29236	2.18953	2.68915	4.53795	7.5643	1.21025	1.59083
			15.8384	3.34035	3.20703	12.7249	16.4262	23.8682	15.5227	1.82893			16.9165	7.93252	5.24202	1.46441	2.79884	7.79212	2.08562	2.19055
			13.823	7.15696	12.4367	7.642	7.34017	15.3107	8.63916	1.00152			6.98239	3.92076	7.80923	3.40113	1.26052	1.22157	3.28286	1.42639
			25.1819	1.5855	29.1384	9.24881	10.8868	1.14513	9.12358	2.29398			1.23282	2.74124	3.35362	2.84326	10.7683	19.4687	9.81771	2.16377
			6.00587	4.39246	2.71525	2.93351	24.699	1.2945	15.4601	1.27906			15.3744	8.80313	4.49028	7.43691	1.26581	1.94728	5.58144	3.07749
			22.7806	5.95015	12.2612	2.99679	9.33109	3.28402	47.354	4.07678			7.46707	6.37231	3.18969	11.9596	1.30144	2.08558	7.66462	1.44648
			10.2012	7.37992	13.7597	39.3439	14.9644	15.8694	11.3474	3.61471			15.5906	5.64124	1.46883	4.91067	3.19462	2.35313	2.37091	2.70025
			4.23182	2.30341	1.66742	22.1595	15.7771	2.2098	2.48064	2.54027			7.96249	11.2188	3.15431	5.54706	4.54036	6.89342	2.00109	1.22028
			2.95318	7.94769	40.2543	7.98891	18.12	2.95159	2.44325	4.19435			1.8077	8.25407	5.28029	6.10024	10.5117	19.7785	1.47359	2.39443
			11.5163	16.6345	36.0847	30.5838	9.65657	2.95763	8.89763	5.78369			16.9774	10.2546	1.5591	2.25492	12.3967	1.22057	2.01654	1.28725
			16.8793	24.5059	1.41323	21.1094	22.9907	2.6418	3.67869	4.20179			6.33663	4.21147	2.41195	1.7199	1.50318	2.84296	2.48633	1.45466
			12.0662	60.1693	3.06549	17.9046	14.5325	1.35736	12.8023	3.48822			11.3524	13.5141	6.04648	23.7441	1.26148	3.14622	1.23138	2.11764
			2.23081	35.8222	1.83063	6.26725	35.5429	13.9925	4.18994	7.39833			5.82618	8.52506	1.93461	9.2242	10.6359	2.13084	2.30264	1.73518
			4.77305	24.1029	8.23602	7.33787	3.89855	1.78333	2.51478	2.6742			1.77692	13.412	1.45295	2.12424	6.55006	20.7738	5.10108	1.70393
			2.00029	9.13074	3.27419	48.6255	1.08574	9.57294	3.30725	2.65783			20.169	6.59021	5.09254	8.01411	10.5748	1.68576	2.3636	1.61092
			13.3376	30.5976	13.8095	8.26433	30.7627	2.38481	6.50396	10.3374			7.2659	8.98311	7.6843	5.20894	1.96877	13.983	1.36711	1.06477
			25.1618	19.7787	85.6683	33.1991	12.3649	5.83026	4.99623	13.0756			12.4162	12.1991	26.1466	26.3863	9.68787	6.96533	2.69115	2.22255
			33.8567	9.59688	25.7089	8.23386	14.4796	1.58468	4.79222	9.78458			8.97194	9.54733	19.6191	8.7806	1.70637	15.8518	1.35249	1.38026
			27.7005	11.6814	94.3737	2.26606	2.77862	4.92401	2.12626	3.11767			1.78337	4.18265	46.8381	4.11546	1.91677	3.61141	3.5966	2.01793
			10.4961	15.5202	49.6428	3.01554	1.1907	1.14664	10.2704	12.3762			7.95533	1.40146	9.97854	11.7164	3.65395	1.15771	2.97238	1.04691
			22.6138	30.2391	70.9121	2.55495	13.9783	3.17237	4.15499	4.80151			9.08147	4.14524	10.9477	20.7238	4.81288	3.35292	2.41643	1.19052
			9.13517	4.15585	84.1944	1.10168	37.2367	1.89397	7.26717	9.98846			9.68214	9.8618	17.6903	2.5362	1.41603	15.7407	1.3663	1.69872
			4.64347	32.5233	121.33	77.6576	2.35396	1.35284	22.4574	8.4951			7.51647	4.86214	10.5678	27.7288	3.1094	10.9373	1.29965	1.62208
			15.9636	6.19535	27.367	28.0306	1.86429	28.0313	3.71608	2.40187			1.56716	2.12798	23.3345	3.15384	2.0694	8.04861	1.51748	1.82596
			8.97767	4.99562	35.2419	4.35221	31.4267	31.1373	2.49608	9.29349			3.82517	1.45354	2.87268	2.44947	3.36025	3.82163	2.17178	1.93906
			15.8326	14.0611	12.8758	12.8029	13.6533	14.8787	1.96777	2.11243			4.57689	5.73679	4.42961	11.0349	2.05977	1.78182	6.17559	1.46136
			9.22609	1.722	3.19114	12.1331	20.1215	19.0141	1.59551	18.8444			6.59651	8.02049	6.18658	5.52948	7.9685	2.72629	1.05338	1.71063
			5.48039	2.15376	11.9572	23.5202	29.105	2.7796	1.65972	1.61464			6.84923	10.7294	30.1277	24.8909	1.40785	7.02166	7.25091	1.22847
			23.1587	2.42324	39.9943	15.3145	6.73061	19.947	3.99162	2.45247			5.21693	7.8314	9.56403	17.6755	4.20429	24.1755	2.0905	11.2876
			9.95562	2.76096	32.5888	24.7203	11.4761	20.9719	2.57005	1.25153			10.7925	2.21747	3.19475	11.8407	3.2861	2.99032	1.89218	2.20693
			20.9908	4.1786	20.1809	67.2122	44.3438	10.9454	11.7993	4.04925			20.9142	5.62304	5.89917	5.44744	3.92166	52.8204	2.4912	2.54325
			8.15435	8.56753	11.264	16.6787	47.2578	16.5026	1.48091	3.75758			10.1324	1.64819	12.4172	42.0741	4.3728	5.24186	1.49229	1.77834
			17.4205	4.95972	17.8824	11.7791	23.152	13.636	13.4631	3.72409			26.8994	2.69827	15.8907	9.81957	7.59391	1.11848	2.16609	1.20243
			5.23268	1.1603	31.7366	16.8205	2.40596	93.0136	3.2853	2.54325			19.2175	8.10391	3.35579	9.3162	1.28459	9.65089	3.03171	4.63931
			8.04268	6.57201	13.4275	26.51	20.4364	20.212	1.66947	2.85353			2.64749	1.31096	9.11342	19.2043	2.23599	6.86677	1.61502	2.27017
			2.89949	10.6899	11.0126	21.1059	2.75744	6.96684	2.60662	11.0369			9.39075	2.47531	55.1521	6.99095	2.37851	2.23595	2.13927	1.56776
			4.29625	1.06272	15.4748	3.01496	20.4254	29.9887	1.385	3.1638			1.33663	6.71407	12.6923	29.58	1.01255	11.2748	1.99865	2.18609
			28.6097	52.7328	16.9241	50.8558	14.6587	15.9997	1.01599	2.43982			10.6859	4.25798	10.8292	19.1188	1.19263	4.02078	5.05069	2.48446
			16.4612	32.132	13.3336	1.1843	41.1165	22.2006	9.27151	2.00454			1.74184	16.3469	3.35218	12.8679	2.06026	2.20225	1.73937	3.02392
			5.56987	32.3014	18.6125	12.2983	6.82161	7.4074	1.34192	1.20094			2.06615	5.58815	11.8965	14.5228	8.75716	1.82959	1.04037	2.87436
			3.71277	7.81725	3.07199	7.54707	40.0515	127.475	3.05528	4.49644			9.91051	12.3295	7.29146	5.76622	1.83684	2.50299	2.21161	2.68313
			25.4389	41.5368	20.9652	43.4154	40.4781	12.2701	1.28827	4.85806			1.24284	6.19434	4.5206	27.1346	7.89917	6.02439	5.91631	1.10049
			7.86226	14.8508	37.8467	12.1888	4.79747	1.53087	2.51315	3.01127			1.39676	5.21099	8.72852	12.0587	3.77721	1.33725	1.00705	2.34532
			16.7454	15.3145	7.79551	11.6778	23.1857	15.9936	2.14984	1.2746			9.48454	3.31305	9.13003	6.07914	2.09203	2.26763	2.65295	1.67491
			12.8752	12.0494	15.0133	1.69295	2.32892	2.24098	2.3132	2.38625			5.94717	9.58879	13.0339	13.5799	20.2082	1.63497	2.05392	1.02608
			20.3494	10.8037	20.2062	12.0645	2.9457	14.0232	1.49229	1.53875			3.56243	2.04557	38.1789	24.6195	17.4604	2.935	1.58657	2.72182
			22.553	20.118	13.7301	6.41726	22.9175	23.2703	1.22975	1.09081			1.2815	4.77569	5.46516	26.3512	3.11807	2.33402	5.68222	2.81558
			11.7397	12.1278	1.92956	2.06154	1.36211	2.8485	1.66297	1.15108			7.86584	3.40102	44.1004	2.31352	6.23421	1.80948	1.49391	1.76569
			15.5591	11.9696	1.43706	2.11018	9.99216	11.5207	1.90437	1.15257			27.6768	1.24625	72.2061	24.4039	2.74877	3.14773	1.37687	1.3118
			30.2191	44.9267	30.2902	6.8509	32.0411	2.00964	9.99815	2.52836			5.76318	3.38434	16.5471	9.4879	5.54136	1.2784	1.18017	3.29923
			9.73726	8.18885	10.5238	14.6066	1.34526	13.0526	6.90141	2.23967			8.02764	3.68667	11.4459	6.34753	5.79317	3.25535	1.84179	1.20912
			15.6479	63.2544	1.10126	68.5682	78.386	21.6549	10.229	2.73819			14.2361	1.21541	17.7986	3.17787	11.686	1.38301	2.06856	2.43015
			15.1768	6.76008	9.55537	43.2068	44.8942	74.6604	1.72393	2.4614			8.42927	1.76093	27.9021	2.89834	8.7095	3.78592	1.37037	1.41002
			32.4227	18.3272	2.60115	38.4251	75.9256	36.8368	5.97645	1.44276			6.98239	15.3772	7.16436	22.2668	6.1692	1.37446	3.1073	3.10205
			20.804	9.52104	39.1559	14.1677	14.922	75.116	1.3915	3.67573			4.69502	14.1592	6.32956	6.92005	1.9524	1.04455	1.03468	1.48964
			26.7254	22.4699	14.6075	74.3286	31.6987	11.49	4.86212	6.26511			13.6462	10.1834	30.9156	2.95871	3.74688	1.25728	2.69847	1.42862
			9.25759	29.8498	105.855	13.9538	26.6129	93.1625	24.8324	1.93162			5.00644	10.604	32.0818	1.90625	5.86106	1.31914	1.36468	2.3669
			32.5344	6.49415	32.5483	1.28334	8.55253	10.366	16.8695	5.89233			6.7354	9.01193	2.32385	7.56172	5.68195	3.02703	1.95883	4.67204
			9.40293	13.6804	7.16364	5.81076	6.40032	89.0909	10.2517	21.4933			6.66882	5.84903	7.867	10.2403	2.02318	1.43582	3.0122	2.79549
			10.93	34.8106	13.5539	12.9617	5.17543	13.6169	14.7814	5.18694			7.42841	3.46776	13.8102	18.4543	7.93479	1.814	1.23544	1.66747
			19.3414	11.2026	16.0409	2.58894	14.4256	2.07049	48.1595	7.90133			6.6366	3.99053	1.93173	13.7159	4.62028	2.28574	1.15254	1.69128
			4.1008	4.13917	2.12093	1.00381	11.6927	4.31599	4.36876	12.1433			3.18299	6.12761	15.0436	11.0965	1.84744	1.23113	1.32647	1.30436
			7.52292	14.5627	10.557	69.8293	6.31365	5.35652	7.79467	1.70021			4.86542	5.24285	49.0269	11.5108	1.58311	2.36721	1.4232	1.05286
			8.66911	42.4109	41.261	37.9193	11.0697	8.67373	8.48717	8.32694			8.22452	20.9021	23.5353	14.9576	3.65492	12.2032	1.71174	2.16823
			11.0918	21.8723	3.26408	25.0286	1.54459	4.75504	7.39315	10.8531			4.85252	9.85877	1.28036	5.29684	4.32754	5.25745	1.52236	1.88623
			37.1048	8.63477	36.3518	37.1154	5.74309	8.41171	8.16937	2.77391			3.38703	3.20385	21.3876	17.88	10.5584	2.4517	5.4644	1.22326
			19.4065	8.27834	24.0755	14.596	28.0578	15.0134	26.0833	14.5504			1.13975	6.53611	2.76363	1.4521	3.10459	1.37547	1.78977	2.21957
			9.46163	9.87849	2.54411	15.7376	77.3936	20.9599	7.75322	4.14375			10.7932	10.787	28.0032	7.52246	1.93555	1.76774	2.55379	1.32222
			26.0782	23.4563	70.2044	12.3692	13.4988	11.4262	11.9781	11.7504			4.87686	8.08318	25.08	9.6092	2.92836	3.86387	1.71336	2.31109
			13.3255	1.27608	66.0434	36.8798	15.2543	5.36155	25.7565	8.81207			7.13059	10.9387	10.8227	4.83566	1.69674	1.33775	4.88894	3.97336
			18.2754	11.5873	21.4129	24.7086	37.9204	5.59188	9.7283	3.49789			11.2743	3.33125	9.17119	12.8773	6.34639	5.73773	2.08237	1.35794
			13.251	5.23425	54.7094	13.9567	12.1059	11.6827	4.24927	3.25905			7.16567	14.8943	18.936	11.3707	1.52051	26.6312	9.58606	2.1727
			6.32517	10.3649	18.1597	13.928	13.9389	18.4146	5.03768	1.11983			7.40192	1.60117	23.7758	3.63377	8.02242	13.7557	3.99243	1.02087
			16.6488	10.8998	89.1548	11.9966	15.2552	10.4063	4.48417	6.4861			12.2852	12.9989	2.32674	24.6969	2.94714	3.00088	1.62802	3.46739
			9.48311	14.7598	40.0297	113.989	34.4976	5.12116	29.0809	12.7772			10.8584	1.0425	4.45489	3.92091	6.92561	5.51293	2.71391	2.36541
			12.1478	1.4687	24.2047	2.78349	50.6325	1.68677	16.2835	3.76204			2.53723	11.2602	18.2875	8.00415	10.2936	5.84183	1.55487	1.84307
			1.68671	2.0481	10.8112	61.6681	28.7516	2.10067	18.1602	15.0824			1.93227	10.8982	22.2073	7.08003	4.34488	19.1549	6.07724	4.39227
			9.13946	4.97388	17.5928	21.962	29.2263	1.21504	13.3013	3.41456			5.4045	12.9746	25.9935	10.4577	23.4558	3.14521	8.07346	1.29543
			48.4314	26.8553	15.812	10.7015	20.5597	11.567	9.16666	1.96957			12.8565	8.3112	10.1988	12.422	5.9328	4.2486	2.89029	2.28952
			19.6463	24.0498	6.24074	25.5987	13.6278	8.65663	9.90549	2.70173			5.58491	2.05517	10.6725	8.84271	5.9925	2.83693	2.70903	2.6995
			21.2743	4.17961	32.5014	2.26078	12.9191	1.37295	2.38961	1.8453			22.9031	6.63318	2.41123	5.63789	2.40885	2.64029	1.754	2.75828
			3.03766	37.0568	2.46972	21.3315	16.8374	4.31046	4.90438	2.762			5.3193	2.13961	39.0888	2.58191	4.08247	1.09886	1.46871	3.28658
			18.8424	40.7976	22.6427	108.649	6.99446	2.03026	19.0258	1.82075			5.39304	4.82928	1.42984	4.16058	4.92843	3.13817	4.13223	2.47851
			11.6538	20.848	4.63542	21.8659	2.43003	1.19039	6.65188	2.45917			7.33105	1.43534	9.71063	2.1342	10.1024	8.98654	7.16963	1.30362
			14.6442	27.8184	6.84373	25.6931	7.99835	10.5018	7.96861	3.23747			8.99915	3.24379	2.77158	6.41492	4.88606	51.366	2.77893	1.27758
			8.84665	15.2583	3.41573	39.3984	31.6723	61.6455	5.60745	2.08936			7.34894	2.78877	13.6037	10.5696	10.9224	3.75675	3.70633	2.8565
			8.57245	6.43651	16.6865	21.5231	16.6602	49.4338	9.03661	2.20618			2.97537	3.68971	4.97411	2.05041	13.6721	2.09564	2.89191	1.43755
			28.7701	14.8195	3.67136	3.40114	3.50518	19.9727	10.1737	1.99338			4.30699	1.11733	20.9016	1.53942	6.15187	6.22203	4.24521	3.67275
			22.5988	13.1238	1.53238	4.59481	4.72525	26.7353	7.53701	2.04621			8.2553	2.33375	13.3647	6.34284	19.2664	6.06663	2.82851	1.72923
			6.77692	45.2245	6.44438	56.4211	3.4657	2.48137	7.96292	1.65929			13.4686	3.72358	21.2772	1.41987	13.7554	3.16885	2.44407	4.75315
			28.4128	8.80464	91.1212	42.1579	21.9935	2.30233	3.55108	1.0856			13.2975	3.34187	9.49976	2.03869	1.59611	2.45069	3.25523	3.24937
			47.9475	6.61397	13.3322	12.2726	15.2697	5.15083	3.00408	2.43982			6.01947	9.82186	1.65804	4.87023	7.2925	2.09513	6.32108	1.62655
			12.4055	12.6172	15.534	20.9957	23.7158	16.1234	4.57032	8.49882			17.5401	1.04655	5.0391	2.0756	8.26365	22.8116	1.07857	2.27092
			16.3638	6.11951	18.8768	2.17757	21.3594	3.25787	3.23085	8.02931			2.41839	7.14432	12.1031	7.46327	8.2545	14.5653	2.23274	2.512
			13.7078	6.10688	27.1352	15.567	23.6633	2.23494	2.93661	2.95621			13.9705	5.28329	3.74141	1.82187	4.50473	3.27295	3.03496	1.22251
			3.77506	24.7753	16.5897	1.55817	7.97235	12.6206	17.2092	3.49045			11.3961	4.48447	8.55159	3.31324	6.25924	1.50723	2.24493	2.60873
			4.08219	4.8313	15.9766	1.45503	5.29147	63.2981	16.0681	9.99962			11.1777	5.82881	3.89667	4.0094	1.92977	2.57592	3.94529	1.00822
			4.82174	7.78186	69.15	6.49052	10.5194	25.131	3.37471	3.77543			14.8783	11.2264	5.33012	13.0519	2.8104	1.22258	3.40641	2.96663
			11.5493	2.2114	89.3476	1.36069	10.1559	7.91483	7.99868	6.9943			1.67526	6.03913	1.63637	9.26814	2.31736	4.99945	27.491	2.21809
			21.6609	1.72352	28.1989	4.09437	6.96124	2.88823	2.20429	7.20562			8.37629	8.99878	12.6649	2.34868	6.74313	4.0414	1.71011	2.68388
			10.8992	1.67801	74.0086	8.36747	30.7637	2.37425	2.98863	15.9857			9.58119	14.2563	3.60782	1.85293	1.17433	4.2476	5.96264	2.32523
			16.5443	1.93687	5.95405	2.017	20.3112	20.811	1.34598	20.5893			10.1253	2.66035	2.01839	1.66541	1.05011	10.3897	8.58795	1.68012
			16.6839	5.32576	1.05505	9.94029	16.8143	113.068	48.1067	2.62733			21.4004	1.74526	2.91239	2.29301	3.09303	5.79456	2.86428	1.40779
			12.3933	4.29741	16.1666	127.674	28.5256	13.13	14.0418	4.00461			3.73497	2.32616	1.29913	3.17377	3.93273	17.9962	1.97183	2.19502
			28.1952	1.86508	19.0985	15.2541	4.02071	4.95972	5.17667	4.16161			20.9164	10.7916	2.31952	2.46764	1.99718	3.87896	2.02548	1.1868
			4.2311	17.6366	15.2538	7.21657	17.7503	69.155	5.76919	1.72848			7.82646	3.53045	1.83496	25.243	1.94614	1.23063	2.61231	3.38926
			9.48597	6.56897	30.7726	38.5552	19.651	2.6584	10.1111	2.38178			10.126	9.6712	3.53416	2.28129	1.4117	2.49495	2.8464	4.02693
			1.50988	32.673	10.5989	19.9778	1.73425	7.76798	12.2236	5.32757			13.2052	2.03242	2.46395	1.49136	1.37511	10.2046	3.03252	11.2779
			4.02921	68.8076	35.712	26.0529	2.68463	1.00884	28.3502	5.47862			22.2294	9.35623	5.73813	19.0022	1.90907	1.98499	7.83775	1.67714
			8.39563	32.2554	15.0667	92.5215	27.4098	4.43317	9.50803	2.66304			8.28036	6.39	3.24241	7.41171	1.02989	7.19718	1.78733	2.99267
			5.85052	2.48643	29.537	13.4211	5.89089	1.31713	1.23707	15.7588			3.3319	3.45057	1.59376	6.25963	2.184	3.13113	3.61042	2.12284
			1.90364	27.283	6.71519	8.41024	5.17612	50.847	2.88216	7.27705			1.29439	5.63568	1.51072	7.03608	1.29229	3.33833	2.06693	1.55214
			21.6252	17.9086	24.6264	2.78701	13.9652	11.3457	11.944	4.76431			11.8106	5.42081	1.76708	7.21949	4.5861	1.79288	2.9992	1.98073
			8.49084	6.4441	85.7022	18.6277	14.8096	22.5596	2.25631	3.56635			3.42783	1.69015	1.15615	25.4429	2.98036	6.57256	3.15444	1.34826
			24.1173	10.4609	1.54466	7.76682	9.51061	1.93873	8.44165	2.79102			4.43299	3.14318	7.24235	24.6705	1.28796	2.331	2.8659	1.39812
			20.4231	12.1051	10.7758	32.8206	28.525	5.71258	9.03336	3.35875			3.34551	10.2157	1.09982	36.9671	3.00155	2.6252	8.50423	1.0045
			10.8169	44.9651	25.1738	9.43164	1.93928	26.9048	2.30345	7.56798			9.86398	10.2774	1.82557	3.13275	6.44269	1.82054	1.53049	2.02463
			9.5189	11.6955	28.4336	20.1654	1.79825	20.0959	6.44381	4.62814			4.22967	8.29704	7.76735	96.0234	3.97221	10.3882	2.04742	2.20469
			17.8043	9.29556	59.4669	44.6179	11.0296	50.9475	7.40128	2.78954			4.87257	20.0704	10.6689	17.7868	14.6442	11.6485	1.8044	1.71881
			22.2473	8.14082	18.6348	19.5237	10.9215	63.5973	7.35007	5.33204			4.77735	7.45879	10.7187	14.2726	19.4812	2.35966	2.64726	1.8453
			9.01847	6.36371	15.8026	9.8014	30.1856	33.8535	28.4989	5.39677			17.9074	12.8462	7.02426	10.429	3.80321	1.1396	2.09781	2.3855
			29.4237	7.72978	8.90328	4.03987	12.8273	12.2897	8.98622	2.38178			1.86355	10.3512	19.6646	11.5447	3.87014	2.51507	5.79114	2.0276
			11.7991	10.3815	24.0523	2.59656	10.8252	4.92552	1.46221	2.15707			11.676	4.94455	15.8004	12.6927	10.4033	3.27195	4.49149	1.68905
			27.8429	4.95011	2.04727	1.02081	1.46409	1.49717	7.16719	1.40704			2.96893	3.65381	15.5325	12.3394	12.4419	2.21633	1.38662	1.73146
			13.0405	3.43034	42.9147	6.58427	3.30538	25.4655	1.47684	2.6437			8.39634	11.8012	11.8265	6.44363	7.25061	9.54326	2.61963	3.10205
			4.42941	4.87276	1.80391	18.0874	1.58812	13.5309	3.91765	2.3922			9.35782	7.30712	29.4179	12.1061	1.88355	1.75064	1.58332	4.15491
			13.682	2.65074	46.6265	39.5226	9.37864	18.6425	11.4376	2.15484			4.81816	3.46776	5.48177	9.35605	7.01565	4.3004	2.18803	1.39737
			16.2851	8.55488	51.1557	7.76682	13.1065	54.2884	12.1033	1.59009			9.50029	5.43193	15.1758	4.20278	1.83781	8.6687	1.70198	2.94058
			16.24	13.4666	16.992	12.9769	18.9459	1.32165	2.60662	2.71513			15.8842	2.61586	29.2734	20.715	11.1554	1.98902	1.27771	1.97849
			19.1774	4.91573	2.78385	1.5775	43.0458	1.18436	2.60987	1.42713			17.1829	3.11133	15.0314	27.8707	4.98043	2.87163	3.35358	6.37151
			25.3394	1.47326	52.2187	33.9738	13.3722	2.23997	3.56572	13.3599			11.1211	6.58313	2.35057	3.9467	16.9086	3.3499	1.91981	2.1288
			15.3959	4.07091	27.6233	37.2326	12.185	2.75747	1.40857	4.47486			13.1529	7.84303	36.0839	4.10257	9.59687	14.5779	1.49879	1.6831
			8.63402	6.82176	23.9159	23.2934	3.54496	1.24823	4.73451	18.8935			1.4927	8.6565	12.275	21.2495	3.92743	5.75231	1.94907	1.61538
			3.96693	13.8867	84.4724	8.40907	23.5562	4.89686	4.95234	4.78886			12.3361	1.57235	2.81201	24.2967	11.3143	1.36742	3.16257	1.29395
			13.0949	3.57393	50.2141	19.9081	2.931	11.392	7.00626	1.97105			5.20547	4.1786	1.34824	5.03607	1.01737	6.43174	1.40207	1.91078
			27.9246	3.12296	19.5455	125.3	10.5324	1.42425	2.47414	10.2504			4.85324	8.49522	1.87034	11.7709	2.00007	3.25636	1.86292	2.73671
			5.12601	1.27962	44.8204	11.6918	1.44596	1.44939	17.8717	32.8025			7.77563	6.7343	1.18214	13.2957	2.52681	3.97602	2.98457	2.39964
			1.47623	4.0608	76.5621	12.1448	25.2565	4.30342	1.44921	2.34086			8.82016	1.08548	23.9809	10.8937	7.85583	5.92732	4.23302	5.75988
			9.07575	4.35859	25.6071	17.1949	26.3065	2.20678	5.57656	4.1936			5.03938	10.5868	12.4093	7.11988	2.22685	5.58886	7.50288	1.38398
			8.83949	1.30843	29.6157	105.398	39.2262	48.4958	3.46655	3.8744			12.3561	2.35094	48.1199	15.3233	1.2167	1.5203	2.08969	2.74936
			38.4873	28.5995	60.5197	16.8721	26.1032	2.47735	5.10352	7.64239			5.42383	16.5496	4.04904	4.79463	1.26629	7.01713	2.67652	1.06923
			10.5634	9.37493	12.1695	27.7218	1.41311	39.9981	2.94312	5.64455			14.0457	5.45772	5.49766	4.44303	1.404	3.34839	1.08914	3.10205
			36.1233	10.4397	38.1998	7.28454	13.2311	29.6311	6.9136	4.33646			4.55327	16.9035	2.46611	12.2884	2.20951	2.89677	1.81659	2.33639
			6.4254	3.55522	27.9743	21.9357	11.7251	70.8277	6.75023	7.70861			2.58735	5.68927	5.73885	3.46442	5.25632	9.04538	1.41019	2.34904
			20.2277	16.2275	60.0316	26.65	16.0528	4.6796	1.5443	16.5884			9.57761	12.9534	6.71302	4.54441	3.38095	2.22841	2.53266	1.08858
			24.1302	6.52347	12.2157	1.12102	33.299	1.71392	1.9824	8.25848			8.54597	2.49806	6.09848	3.6033	7.19957	2.02372	1.05338	3.25905
			35.5506	11.1596	13.5178	17.7932	4.42794	122.595	1.71905	3.29327			12.2229	8.55185	15.4553	1.50894	24.8776	2.36821	2.0588	3.31708
			13.1179	51.5017	11.8886	50.5066	14.7264	23.2778	3.03821	6.6364			9.3385	3.21851	15.4365	1.57926	2.04244	3.61996	2.91223	2.03281
			15.4181	8.13627	41.8748	13.7381	48.5493	9.71677	4.55651	3.33941			21.1297	9.63783	14.7858	4.09613	13.4179	11.9894	1.99622	2.10127
			17.4929	16.8949	6.02049	29.8355	2.64498	6.92108	1.40613	2.92644			12.1435	23.8188	10.3577	1.14211	2.66884	8.14316	2.43594	1.49708
			21.4576	14.954	29.142	9.77503	28.179	14.3446	3.36008	12.0495			4.29697	4.51026	2.80335	1.98419	8.44709	4.29336	1.42157	4.05
			4.64562	15.8832	3.46122	6.51923	1.60681	3.63555	6.14795	4.09092			14.6599	10.284	16.3854	4.37565	6.83509	9.84652	1.23869	1.39663
			21.6345	3.20031	8.49671	3.12161	4.5027	10.4384	3.09511	11.3642			11.0138	3.56989	19.149	1.05011	1.90088	1.3116	1.00949	1.09602
			21.9151	1.91058	44.5337	10.9576	2.07407	22.4213	2.14658	8.39539			9.05643	10.8224	1.23992	11.7118	3.00396	2.17962	3.19833	1.96063
			18.357	5.2297	16.7753	15.8343	2.07804	4.79728	1.34598	5.39305			10.4532	4.01126	1.63637	2.9839	1.55711	1.44939	1.16229	1.54991
			20.8319	22.3491	1.38579	42.6747	9.62162	44.2397	10.5476	2.10201			26.8478	1.8125	37.6791	2.26957	1.092	1.74108	2.05555	1.89516
			11.8578	23.9801	8.94372	43.0433	1.39895	27.104	5.41319	2.43015			5.58061	18.6695	8.62308	16.6078	10.0167	1.89397	2.34572	2.99267
			7.185	8.41787	18.138	23.8068	8.20568	8.15221	5.4457	5.39975			1.56859	6.29141	12.4028	10.6663	5.3011	2.14693	2.73667	2.90784
			28.2453	16.1739	3.24314	49.5309	6.29925	2.97623	1.75726	2.65263			4.42726	12.5014	19.6372	2.09084	1.28748	1.97997	2.13114	1.13546
			5.48468	2.68867	2.91817	10.279	17.1063	13.821	3.55434	1.94947			5.04582	17.1972	5.53088	9.71702	3.59955	2.73031	1.78895	6.37672
			22.0798	6.64835	2.55132	13.5717	85.5892	25.6968	2.08481	1.46806			3.83019	10.4599	20.7298	2.90069	9.97194	1.45694	2.10919	1.6325
			11.0001	3.15733	4.16386	1.63611	37.0552	2.74691	2.29695	4.46593			23.14	4.12906	4.10681	7.09937	13.8401	1.75567	3.31212	1.45764
			29.6385	4.05676	7.13114	4.74248	16.0625	26.8978	2.19454	2.10052			5.42526	3.29738	18.8132	3.06594	5.74454	1.1748	2.41887	1.42713
			5.27277	5.89656	1.92956	24.033	12.4235	22.4309	1.21675	2.59831			9.48955	4.77468	4.36967	11.1556	1.55759	2.26311	1.42076	1.33636
			7.46206	2.48795	6.44727	11.1428	12.9355	30.3467	2.20835	5.86628			5.47252	1.19114	2.19242	14.4589	1.89463	2.22338	1.49716	1.06105
			5.5799	5.17965	17.1516	1.69646	13.3597	99.5158	1.41182	2.89668			6.49413	1.10873	15.8972	1.37124	3.29381	2.36067	8.28478	2.5745
			19.2161	16.86	13.4109	2.50338	40.2519	35.8089	2.94799	1.37728			6.28795	4.3328	25.7046	19.6216	2.51285	1.36692	1.86617	1.0804
			39.7745	23.7288	21.4938	4.34225	4.37017	111.651	3.25848	1.93013			7.11556	3.0729	4.39062	12.7595	1.53929	2.57743	1.4614	2.64072
			77.916	8.55438	14.9837	58.332	12.9593	24.0387	3.38365	2.14219			4.3299	4.50167	8.0692	21.8138	4.44166	1.40916	3.05935	1.18382
			27.543	45.3074	47.3183	15.914	12.4852	3.94987	2.24981	1.3624			2.61741	4.97337	20.6381	7.29743	31.6901	1.81602	2.67896	1.87358
			13.1064	5.20594	53.1293	10.7578	1.01098	6.56401	3.18289	1.07593			1.85424	2.42324	2.66903	4.16645	2.21529	10.192	2.67164	1.3557
			4.06572	36.1539	45.453	29.6298	57.4862	9.00012	2.62532	3.4153			2.03036	1.25737	13.4629	2.57312	6.38106	2.06697	1.1249	1.74188
			20.0258	14.7882	18.7814	20.8815	47.5967	7.35409	1.68085	1.2813			6.86641	3.13762	3.7638	1.94258	1.57204	1.86882	2.1352	1.47103
			18.0276	3.23216	32.2255	36.3963	9.73036	38.9496	1.13791	1.97477			2.49785	5.58765	25.8642	1.73104	9.59831	1.73957	1.22325	2.29547
			12.6496	14.8048	3.57315	42.5394	30.9514	2.14341	10.2257	3.18985			5.53408	1.03745	15.5585	6.90892	1.31348	3.93579	1.63534	3.07824
			8.32832	1.76497	20.3824	13.4094	5.82689	7.10263	3.00164	1.30064			12.1134	1.31956	6.56426	2.07678	3.16092	1.5545	1.30128	2.40708
			20.8842	51.5219	33.9904	18.5035	18.8473	8.09689	11.4205	17.363			5.21048	2.58704	2.46683	1.98419	2.60433	1.01186	1.67029	3.35354
			17.0318	10.9892	21.9437	7.94907	9.08696	43.9264	4.99217	3.76204			1.05599	3.65482	7.97243	3.85001	1.93651	2.33351	1.58007	1.60125
			6.69459	2.89494	28.4372	9.27166	13.5579	2.87062	4.28666	5.46076			3.48296	1.24575	1.92234	2.31938	1.84166	1.08327	1.16798	1.02087
			12.4742	10.6692	96.4419	4.43659	32.4132	1.65509	7.37771	8.68484			2.77778	10.3012	1.17853	7.31326	1.34814	4.66552	1.91575	2.21957
			5.55914	7.58569	56.501	36.7339	10.1047	15.9428	7.2566	1.90855			7.66323	40.2172	2.70731	7.35838	14.3033	1.95934	2.61637	2.166
			17.6332	54.9462	6.32668	30.5141	1.98685	9.96068	2.11488	16.0028			6.72322	1.27203	5.2088	1.35658	10.0263	3.9197	1.74831	1.02459
			9.04926	3.25896	15.5874	2.01525	1.14012	9.97627	7.67275	8.15654			16.8492	10.2177	13.9727	3.65077	5.14654	1.11194	3.51614	1.224
			12.0747	8.15801	72.3614	39.9733	3.07713	5.15083	18.7348	5.50541			8.69273	17.0921	4.94883	4.80225	2.70785	16.1219	5.49366	1.98221
			15.5591	3.86616	2.58454	23.1411	12.5152	33.2666	13.0697	8.05609			10.5813	7.08972	13.1589	1.46383	1.28652	2.62269	1.75563	5.31418
			13.7085	1.59864	19.045	5.86233	2.87153	29.7146	10.2753	6.89236			3.84522	13.595	13.2491	3.49255	12.712	1.58669	1.27364	1.25153
			13.4586	5.49058	43.4324	27.3368	3.33879	48.3314	16.5614	3.58941			12.4005	8.56348	15.3224	2.04162	1.59274	1.4504	2.86428	1.34529
			26.129	3.3717	117.599	13.0625	8.98501	20.2975	2.88541	3.63108			6.12973	9.24348	1.78152	1.69939	7.91554	1.49365	1.59795	1.62506
			16.6065	17.4126	2.5506	11.693	2.34027	1.32719	6.61856	2.34383			4.85252	9.43004	7.80562	30.4028	5.72384	9.69464	1.17692	1.13769
			24.5347	4.54767	10.5844	40.9935	2.49829	9.09416	30.1814	1.54544			8.52377	2.79079	90.6944	5.38181	3.23218	2.09413	1.10133	1.86093
			24.2669	7.68934	25.7819	6.30651	2.6682	5.82674	25.9248	1.15778			3.03909	8.18126	4.71919	2.6827	31.8451	3.99363	1.60933	1.12802
			2.43628	93.036	42.815	79.9999	8.08107	4.40953	8.27015	4.60061			7.7205	8.13222	4.27579	1.55289	4.85044	3.02251	1.05256	1.09751
			13.677	22.6792	16.563	16.6746	45.2156	4.55337	5.67491	2.74489			11.376	17.9743	6.22124	9.0191	3.0834	1.07271	3.46655	1.36686
			1.94087	36.4891	19.5065	12.7683	11.8192	19.9681	2.30345	5.70705			2.34679	8.19441	2.32168	14.0159	3.37325	16.3421	1.87186	1.19796
			1.89648	5.51738	13.6015	2.67801	12.2473	10.3912	2.48145	1.41077			2.31887	4.23472	3.59337	4.00237	7.77109	2.96618	1.02249	1.57149
			5.80183	21.6802	36.9332	7.9098	3.59763	1.57713	3.01789	1.20614			4.95561	21.1124	44.1777	14.1612	5.02039	8.29353	2.08562	2.65486
			2.64676	6.39101	1.75625	3.06653	18.6882	4.94916	4.74101	6.39532			3.41066	6.50274	23.6739	2.11663	7.54528	2.19571	1.2712	1.01566
			12.6625	8.53365	18.7396	11.8758	12.1448	46.3856	2.0076	13.8867			1.8614	3.25592	1.05938	5.11869	11.6971	2.84447	1.4866	5.22712
			3.93543	33.3793	29.1449	3.02961	7.79279	1.78483	4.34843	3.4592			9.13374	2.38279	2.47694	11.4445	8.36475	4.15205	1.35086	2.23222
			38.289	17.9207	3.14348	2.35688	35.5158	2.49143	5.11652	1.32073			5.50186	5.82123	2.26752	3.12923	6.83846	1.31411	1.32079	3.13999
			8.35553	3.80144	9.3315	48.2886	56.9447	24.347	6.32514	1.01269			9.40221	11.3239	17.86	4.15473	4.87499	1.87838	1.03794	1.54842
			25.5284	11.1445	15.7723	15.812	30.3363	5.59993	10.1119	1.1109			2.38545	15.09	2.48272	11.8336	5.98865	1.59775	1.58982	3.60206
			28.75	1.32563	2.7138	17.887	25.7368	8.27794	3.75835	2.01123			6.79554	6.21457	1.1186	1.31615	3.02418	2.05238	7.60854	2.37508
			12.9689	2.51424	13.925	1.60739	11.152	2.82184	17.4051	1.06626			1.24284	6.3086	1.36412	6.85618	9.13657	1.22811	3.10324	1.44871
			20.7324	4.6948	12.8945	40.3407	12.6206	45.2787	6.07236	2.85129			6.81773	4.51178	3.6367	17.7845	2.61203	3.61041	8.40751	2.40857
			7.26518	10.7648	56.3949	100.996	9.74679	11.0711	12.5975	1.43383			12.7055	2.67046	2.90301	3.39058	1.22681	1.09534	5.15147	1.25897
			11.5521	1.83323	20.0762	20.5967	54.8112	5.09551	7.142	3.57007			8.84379	19.0092	1.2818	1.30385	2.51525	1.59775	3.05122	3.20696
			25.3007	24.5989	23.0009	2.00646	1.25849	19.8213	13.4395	4.97488			4.19888	11.3421	1.86818	39.9522	1.86477	2.40543	5.49122	3.79478
			43.6233	4.27921	21.1616	16.8691	6.82598	7.02317	8.23764	5.99203			14.2282	9.23388	20.2019	4.79053	8.12402	1.27539	5.11571	4.175
			25.6043	5.48249	51.1319	42.7626	14.4398	8.54146	14.9732	14.5377			4.87257	4.73726	8.67436	23.4944	3.97654	2.78714	5.83341	1.70021
			20.9651	10.059	9.56187	53.3551	4.48514	1.3131	16.6907	18.7373			1.81128	5.77168	1.90068	3.43043	11.3249	2.58748	3.89083	1.10495
			13.7636	3.74229	9.84061	53.8368	15.8455	13.383	3.12762	15.662			1.27649	11.2916	2.29496	22.9313	5.01077	5.20363	3.5519	6.59101
			10.426	7.18123	43.9632	34.8452	28.239	13.7647	6.9071	10.5487			21.1197	4.74434	4.45777	12.2825	1.50077	8.40919	4.09728	4.26801
			37.5551	11.1065	15.4986	17.4463	20.6484	7.43707	14.4612	10.1038			2.01389	1.28164	6.68775	25.103	1.34574	1.55651	1.92794	1.37058
			15.8169	8.07054	50.5535	54.9027	30.4167	29.5396	9.11058	2.26347			3.4307	18.9956	1.85085	11.5635	1.68133	1.75969	9.0041	2.06927
			26.0961	17.0597	15.3014	17.1709	11.2953	13.7798	11.6538	1.29915			6.67884	6.31922	16.1803	38.8704	1.05637	5.08645	1.4549	1.21954
			15.2477	21.1104	19.1678	30.248	1.64533	40.6569	10.142	3.8052			4.86756	2.0395	1.47606	1.32494	3.22736	7.77452	3.84613	3.52989
			8.45791	16.8671	2.75497	73.3154	3.86836	53.3846	9.86404	5.84768			3.79725	5.21251	1.52011	12.2251	1.76174	2.30435	3.57791	1.71063
			6.0431	5.18066	31.0492	15.8407	3.58857	15.0668	3.1959	6.64682			4.67927	1.21895	4.58992	6.41434	5.77824	2.95562	2.20104	2.51869
			3.61756	2.67653	41.9665	35.0931	16.11	15.5164	27.5975	7.36411			5.3329	1.8767	2.24369	23.2876	19.6651	5.66581	1.48985	1.17787
			3.54095	14.049	26.0895	11.1076	4.52026	12.2278	4.89219	19.782			1.34665	2.39341	1.08032	4.77471	1.14159	2.29982	7.3834	1.68086
			1.623	5.54366	3.6302	34.2885	55.1759	24.5351	2.70253	1.04766			3.59751	1.02278	1.64142	4.19692	1.08381	1.28745	6.54216	3.92127
			14.3593	5.0396	12.8592	8.46591	19.9988	7.86404	7.08266	6.64235			6.33162	10.8684	4.27002	12.7085	2.35637	2.3662	1.20456	2.80442
			18.5746	21.2803	23.4927	2.0674	33.6479	7.62214	3.46574	9.27861			2.33605	2.33628	11.0358	1.11808	3.3641	2.29278	3.45355	2.00454
			6.0116	21.8708	26.0967	8.74954	29.8804	4.76509	9.00248	6.65128			2.87944	2.38987	4.47222	5.17612	10.5025	2.3134	1.44596	1.84977
			36.5851	13.9656	13.6795	12.1349	2.73277	41.9228	1.83284	4.95256			5.00788	5.9916	18.45	12.4876	27.9904	6.81195	4.81254	2.21437
			19.7602	8.71111	5.71502	33.815	36.9646	5.54461	2.11407	5.57312			7.54654	3.55422	9.86878	2.13127	9.32049	2.07351	2.7261	1.77238
			16.0632	15.133	8.04681	41.5519	34.7914	14.6941	2.07831	5.05301			9.98569	1.51421	7.25535	1.07999	15.0289	3.92976	2.60012	1.65556
			5.53265	8.99474	39.2931	6.579	3.86383	1.87938	11.3961	2.31482			14.2182	1.3231	11.4589	7.72756	6.57895	2.41146	6.32596	1.40035
			20.0129	12.0292	35.0816	10.9341	2.02027	10.1473	2.73748	2.44652			6.40393	1.14867	27.0485	3.03195	6.05028	34.444	2.21404	2.52613
			20.7897	1.38023	9.60231	32.3793	2.63932	31.1288	12.1488	3.07972			6.82489	1.28366	6.01471	12.909	33.5601	9.15753	1.33216	2.86617
			19.0178	10.4751	12.8368	3.28686	19.3826	9.24453	2.98051	1.03575			1.46263	5.36469	9.42683	2.01115	18.4869	13.9779	2.8594	2.34607
			6.51991	3.77667	31.4008	17.0678	75.1317	7.88063	3.9843	3.08047			9.12443	1.14968	8.2288	10.6365	6.25347	3.91467	4.33787	1.75155
			17.8365	4.42735	28.3274	8.68684	7.74295	9.32299	2.86346	8.08139			16.1526	3.13559	24.9449	1.11398	5.05073	14.082	3.98512	1.64217
			30.3845	5.46277	13.7127	12.4109	1.69234	10.8443	2.40749	4.43617			8.6283	1.3322	23.518	2.20921	3.90625	1.28846	3.2471	2.19576
			27.1421	4.20995	14.9859	22.1865	26.1689	25.2678	2.84233	4.58275			1.57145	11.6723	7.05892	5.38298	31.9356	7.08352	2.9992	1.35421
			21.2758	6.73784	3.99272	96.5461	1.00079	9.5498	3.45274	1.77983			5.67727	3.26249	23.8848	2.26488	28.2764	1.45543	4.08834	1.88995
			13.0584	44.6329	1.42912	39.8233	6.84014	9.81383	8.60909	1.82075			5.31716	9.8527	18.5287	5.85061	8.22176	8.14467	2.61231	1.47029
			45.9293	19.8414	2.30652	21.2975	33.5075	2.54423	2.6115	2.54994			5.68156	10.1363	33.4878	19.2571	3.53262	9.21134	3.78436	1.81405
			68.1136	29.7785	2.33107	13.2143	7.27625	31.7675	1.41832	1.15108			13.8946	15.2017	23.6566	10.4917	2.92836	1.22157	3.94691	1.5633
			7.30742	7.54272	3.51394	8.35809	1.65326	5.59289	2.61881	1.48815			12.2645	7.16101	1.46089	3.02317	8.04217	11.5961	5.592	1.21061
			7.70762	33.3869	34.059	42.697	1.80958	23.405	1.03225	2.69801			5.68729	8.93002	38.8338	12.6605	1.47333	19.6629	2.58386	1.2627
			3.98411	5.07095	1.7483	28.6981	6.57507	62.9767	7.52808	1.44276			11.4032	7.36425	24.0148	1.72869	2.32651	9.42106	3.68845	1.18903
			14.0457	5.66298	1.28613	20.6148	10.6264	5.81869	4.81741	2.46735			9.13946	16.6325	25.0128	27.0239	4.79699	4.59561	4.92958	1.30957
			19.6578	6.17614	54.9224	53.9804	1.78805	22.9172	2.29207	1.66598			7.3289	9.61508	41.4321	6.03168	6.22602	2.21131	2.0336	1.80884
			13.73	6.31315	31.2904	75.7801	30.965	3.19902	1.24276	1.91078			6.89934	11.5787	18.2745	2.56784	1.42277	7.20925	3.12762	2.35648
			2.86942	4.88439	16.3384	33.137	59.3745	18.816	5.73749	2.99118			5.44745	8.88958	18.7056	2.27368	5.01221	2.45069	1.39394	2.15707
			10.31	5.50271	81.4777	20.4273	48.1993	2.0725	2.00353	1.41077			8.7679	15.8923	14.3136	1.80429	2.90092	3.712	5.71799	1.20391
			6.22853	18.9814	43.1725	21.8214	17.6013	37.4453	9.05368	1.73518			19.3936	8.75206	23.2688	19.8894	2.28992	1.18486	1.37362	2.951
			2.08978	6.55785	21.1125	24.742	35.1958	9.35266	1.92307	20.8281			8.7858	3.03448	1.5526	4.81046	11.4737	1.56557	4.38826	1.31032
			10.8949	10.8148	2.84596	52.1755	18.0856	11.7103	6.33489	18.0245			1.36813	1.05059	11.0191	25.0842	15.5234	7.51753	1.85316	3.16752
			6.11255	8.25609	21.6657	3.14446	66.6439	4.2657	3.2723	2.37434			8.89676	14.818	21.2995	1.94669	3.15273	1.16625	7.2054	1.16299
			18.7837	3.70437	13.1025	41.256	9.07846	1.83261	4.49636	9.57177			4.13302	8.11908	12.2937	5.1228	1.13533	2.36469	2.02385	1.36686
			3.15579	8.69443	4.925	92.1177	32.1334	7.04027	1.95233	5.07905			3.68772	2.5653	3.06115	7.54355	2.59951	2.21784	1.22325	1.70244
			40.95	6.39708	73.0294	3.16849	20.6818	2.10569	5.88542	2.81186			16.6173	16.7003	1.24208	2.34575	5.79895	21.1998	1.83853	1.17787
			8.12071	7.85618	15.6206	12.8914	4.27332	55.2072	1.82472	5.10956			3.08061	6.31366	36.349	9.60334	2.71796	1.28746	1.84585	2.81186
			35.9021	1.30995	118.109	57.7929	5.54823	1.52181	2.8147	11.5101			3.54024	15.8559	21.4014	2.6704	12.3177	3.69439	1.98402	1.9651
			10.2456	12.7643	1.06732	15.6174	4.15494	15.7321	1.9255	8.82175			2.10839	2.87016	9.13653	14.4876	2.14307	10.0095	2.57899	1.58339
			22.3504	3.87627	14.962	37.6914	13.4532	13.7335	2.44	12.2259			6.53422	9.88101	8.6758	8.71262	1.18829	2.76903	2.38229	1.95915
			27.6418	1.60571	18.0817	27.5864	8.96066	7.62767	2.29695	4.31712			6.6903	8.69948	55.8821	4.30709	10.0673	17.8021	4.2257	1.16076
			50.4668	6.71913	46.6568	41.133	10.3823	21.3672	1.38012	7.90579			12.5766	1.19923	8.07498	2.58249	1.83588	10.271	2.9041	1.75006
			11.0481	1.57943	59.8691	29.1446	1.75407	16.1666	1.1883	7.54566			12.5236	1.10924	15.5116	2.47877	2.96592	28.0072	2.15308	1.33859
			9.86613	7.30358	46.7319	11.962	59.9811	1.99455	2.35141	5.85289			3.41781	6.98911	6.80979	1.23118	5.02473	2.16001	1.83691	1.13992
			8.71063	24.8785	81.5665	8.46357	17.8432	1.65408	2.89354	2.23669			16.0538	4.94152	5.46877	3.0888	4.86488	4.08717	2.11001	1.01343
			15.605	10.3836	20.0748	3.55759	2.97575	1.39307	1.92469	1.11314			4.60481	22.6696	40.0716	9.95904	2.54655	15.9584	2.41155	2.94579
			24.6957	20.6488	16.0561	21.4141	8.84058	1.47806	1.6012	3.78139			7.58806	8.53719	9.42972	15.9561	1.87537	1.52634	3.69332	1.0551
			28.3162	27.0494	11.438	27.3878	63.2757	38.3777	2.35953	6.47196			8.04196	4.67104	4.61015	2.41549	2.48348	5.06282	1.31753	1.68235
			23.1751	29.001	56.1551	6.40379	16.942	3.27597	3.45111	1.23888			5.5441	7.23532	68.0091	4.76065	1.45166	1.74863	2.45382	2.1407
			62.9776	9.46897	47.6187	2.38267	8.6701	19.3455	1.50935	2.29249			9.03996	2.39139	5.36045	4.11898	3.9544	1.09635	1.69386	1.40481
			12.4141	13.9074	6.42272	50.1368	1.94211	33.9134	2.60825	2.33639			21.2693	5.34345	54.3411	23.7534	8.58768	1.04304	1.26226	1.06775
			15.0415	6.40011	52.1393	33.2818	1.50883	63.4283	5.81065	2.76275			5.77463	11.281	34.0092	1.70291	3.76229	1.81199	2.09538	2.19948
			34.8948	6.10688	21.241	1.7369	3.24534	19.9546	1.92225	3.19208			17.8809	11.691	12.415	4.07679	19.6569	3.09341	2.02954	1.84679
			17.6904	7.68125	115.267	3.17201	41.0839	1.44437	13.7386	3.28435			9.30914	2.85955	3.51683	14.5632	28.597	18.5685	1.13059	3.41084
			5.92855	4.25849	122.448	9.73695	9.37751	48.7589	7.12655	3.4912			6.49557	5.87785	7.36584	8.10963	26.1348	1.25477	1.05338	1.18531
			6.37958	13.8458	34.9372	4.89308	13.7177	13.8914	3.78029	4.5649			5.03795	13.6936	9.81389	3.28217	1.01544	2.96919	1.54674	1.0618
			6.48626	7.59176	75.4081	61.4882	18.8825	1.90956	12.5836	2.93686			5.65579	1.25687	1.79813	5.09525	6.43258	1.94577	4.21676	1.30808
			13.0756	22.1625	22.3286	19.1188	13.0397	64.5684	7.48906	4.41162			5.7689	10.5059	1.38795	9.40937	4.7368	4.0761	4.35981	1.29171
			8.57675	2.61536	20.0741	29.6486	14.7672	6.44331	10.0437	7.71382			4.05713	21.1716	4.88889	10.4202	11.31	5.91877	1.48172	3.22928
			1.97953	12.7861	15.4654	35.4447	9.76321	37.3433	2.04011	2.826			12.1685	2.39543	36.8176	1.32611	10.1823	3.32626	3.838	1.11611
			4.45089	1.88176	32.1938	10.8263	4.00089	2.02573	25.0649	3.04029			2.08333	5.25397	6.85167	21.4762	2.40644	1.21302	3.62993	3.34015
			3.10424	1.98186	9.76912	6.1231	1.16051	5.01102	2.82933	1.25674			5.62429	1.12441	8.38116	16.6681	11.1872	9.92447	2.26362	1.95245
			5.28208	14.5094	5.67892	55.3762	7.29381	17.614	13.3907	1.70616			5.82546	3.42327	15.352	8.03052	19.8428	1.5535	2.00678	3.42944
			7.31959	11.3671	15.1931	53.1325	4.64996	76.8118	17.8408	1.29915			12.8107	2.68563	2.8669	11.393	6.78165	1.97695	2.06043	3.39447
			17.8651	10.8112	10.0515	19.3069	43.8591	17.7608	8.95778	1.65482			3.26174	22.6721	10.7462	10.0839	7.31273	15.1175	3.4633	5.69515
			17.2337	21.7519	6.21186	14.4062	9.71451	8.62545	9.19998	1.05361			22.8186	7.41885	2.25525	5.96136	4.72525	1.55601	1.47278	1.90334
			7.77706	8.28411	5.11998	13.8917	1.42048	7.09509	3.09348	3.78659			1.6273	4.03451	13.2679	1.46031	2.45218	3.26289	1.71662	4.89229
			9.75516	3.00284	2.34407	18.4777	20.7277	2.69511	18.4219	1.538			3.86097	5.4476	13.1336	22.1038	8.15242	2.93651	2.23924	1.77462
			9.43729	20.6086	11.1195	2.03693	7.51016	50.8605	31.9224	15.4909			4.06715	9.53014	8.16163	2.63055	10.0846	9.32752	1.63452	1.32296
			12.0339	8.08137	12.8982	14.4935	1.698	3.47412	4.26553	3.14669			4.22538	11.9509	2.11443	27.1757	3.71992	2.08859	2.77081	2.72406
			51.6896	5.0001	28.4264	67.6757	4.91389	3.11655	6.58117	1.10867			1.38244	1.45758	16.1333	1.80897	8.6132	6.08675	1.19236	2.53357
			8.28465	7.343	19.3122	3.92853	2.7339	90.928	3.03334	10.4572			2.87085	9.80619	8.00421	9.7428	6.91021	1.49968	2.14089	1.56479
			24.4602	8.13597	17.9777	28.2627	17.3782	10.3917	21.9007	7.48018			8.39849	6.18069	39.0368	10.422	3.53407	2.9526	5.49122	3.79552
			25.3179	35.6089	27.5013	1.26224	1.06762	35.0233	4.1493	20.8646			1.90149	1.98793	1.30707	12.9646	4.23269	1.58367	1.77188	1.19573
			1.42253	24.2255	29.3839	8.27429	3.5931	19.431	14.2848	11.2087			3.21091	6.60942	3.5421	10.4864	1.69722	9.0303	1.62883	1.02905
			13.8961	11.0953	76.4617	3.24584	16.071	4.78018	1.77351	8.95047			3.28322	4.05474	8.08942	2.15062	1.16229	10.3655	2.63019	1.14587
			14.7552	15.6027	1.84218	6.53622	2.12901	20.5279	23.905	8.74585			5.85839	1.81604	1.80463	18.207	1.456	1.91559	1.25739	2.30365
			14.6635	4.50514	28.053	135.879	31.2453	3.35443	2.49446	5.9273			5.52836	6.33388	4.42311	5.50018	11.1155	5.08595	1.1818	1.73221
			2.80928	26.0415	23.7303	36.9431	1.14125	32.028	12.0821	29.0301			6.89576	1.30743	5.83345	26.9049	3.57932	2.22187	6.18697	1.8148
			15.7374	1.32569	38.5876	60.1832	3.62255	35.7209	8.59446	17.0319			7.49285	1.58448	2.45528	7.22887	2.84603	12.8982	2.0458	1.85349
			3.53737	2.14306	57.7489	5.62265	1.9625	44.5771	13.0299	5.8395			8.94831	4.97084	1.58871	9.68948	13.4713	9.32701	2.89923	2.02314
			14.7265	7.11179	14.5418	1.8371	4.7536	8.89099	9.09839	4.73157			1.98239	10.8355	8.99426	4.88195	1.87585	1.67671	1.56787	1.31999
			1.68457	7.94601	64.6562	13.6889	8.56816	27.3242	2.00841	6.059			9.26261	1.18609	7.18674	18.2544	4.42817	3.50027	2.54241	1.72848
			6.34158	9.30307	63.7232	23.2249	40.6059	12.3113	4.32486	6.73239			1.70748	11.0469	1.83568	10.1512	1.88163	1.41167	2.84396	2.34012
			30.7804	24.5224	11.2105	3.62616	50.2694	2.5563	2.29857	9.75779			1.17554	4.77872	3.64176	31.2331	5.83217	4.5594	1.93444	1.63994
			1.85945	22.0383	28.7506	33.331	40.5135	1.12401	2.74724	4.8655			5.64433	8.81172	4.05988	2.70379	9.2449	3.94132	2.07262	1.40853
			8.69733	13.1976	50.4271	18.4771	2.30402	5.59892	19.6525	7.22348			12.4613	17.6103	1.06949	17.6092	1.28314	16.4593	1.4931	4.70404
			39.8408	4.25941	12.4685	42.7591	40.1805	2.53971	9.54461	5.25093			1.00014	7.31015	4.02594	15.2922	1.91677	2.95813	1.08752	1.20763
			18.9421	51.6043	22.2614	11.2154	2.95649	11.9311	1.98809	5.99426			4.83677	7.68883	8.71552	1.20891	1.40352	4.91396	1.13709	1.5194
			84.2214	11.6617	58.297	14.698	13.597	13.2532	1.25251	4.53588			3.21879	4.03906	10.4443	9.82133	1.14977	1.41117	5.13034	1.34901
			7.20045	8.87899	5.49694	29.3345	8.47131	14.3511	1.65728	3.84687			6.52778	32.2822	2.30796	2.00822	4.0998	3.23172	1.05663	1.42788
			4.38146	29.1036	41.1021	3.97072	49.4487	5.34646	26.5328	2.46214			1.18413	1.54252	7.25607	8.00532	1.59177	1.94225	1.04931	1.37431
			109.701	19.1069	76.8531	13.2957	31.106	12.004	3.72665	6.70262			1.37027	6.39455	4.85279	16.136	3.38144	2.09865	2.38798	1.6697
			108.48	3.41705	26.052	61.7167	9.43754	23.5202	13.7085	1.55884			4.76375	18.7382	3.88439	1.46499	4.45129	4.33762	1.06232	1.08858
			96.5289	1.31988	51.4728	6.8931	2.47054	3.69037	2.8594	2.97183			15.4066	19.0128	7.05315	10.2614	6.00599	6.10184	1.51342	1.15704
			28.7337	7.63463	9.66297	27.127	2.02367	1.50321	3.44949	2.30291			1.96735	2.17601	5.28824	1.03311	2.35203	1.42676	2.91142	1.34603
			49.6835	22.8342	2.34624	57.4161	10.4349	1.96739	2.30183	3.61174			7.70117	3.33327	1.75914	2.45123	2.86481	6.36989	3.74778	1.5566
			17.7097	4.17575	51.7746	7.23942	14.5525	1.18335	14.3702	1.44871			7.09694	4.63565	1.39806	9.56524	11.0004	1.18034	2.72529	2.51572
			59.0644	14.6035	35.3697	5.77208	1.34515	1.58015	8.68305	2.16675			1.98955	6.98608	3.03515	2.66453	5.55869	1.95683	1.84097	1.53354
			13.6893	5.06516	17.2007	32.4098	12.5192	28.573	9.30809	2.35276			2.56228	4.16192	1.00666	8.24324	11.568	7.69657	1.51423	1.48294
			18.5119	1.73002	14.2464	3.05539	5.02547	4.53728	4.1623	2.23966			2.19359	5.86066	1.01533	6.59893	15.3636	1.4851	1.42807	2.43312
			1.22945	4.70208	56.0078	49.5497	2.36236	2.5382	21.9641	5.1423			3.95977	4.74182	10.2984	1.69295	6.86254	1.21956	1.54105	1.15852
			33.7086	1.109	4.20936	2.60945	19.0139	20.0451	22.5737	1.03054			1.00229	6.707	1.71798	10.2052	13.8387	1.68626	1.69386	1.0856
			129.66	2.50847	9.0282	7.8512	20.6156	70.7261	22.7825	1.14587			3.49227	15.1704	2.70586	13.4481	23.1631	3.84326	1.77107	2.55813
			81.8291	30.0035	2.48489	19.4598	3.00237	14.0956	1.96045	2.30291			6.04239	4.66901	15.474	6.46766	17.6106	1.37547	1.44839	2.03653
			81.1074	9.73064	11.5073	26.9547	1.00249	1.70739	6.13332	6.12299			1.34092	1.05059	2.42856	32.7104	7.97139	2.25254	2.00353	2.17791
			33.4897	29.0473	11.0473	6.50985	6.72403	18.999	2.83258	5.79411			9.99428	38.6909	1.0731	7.29509	3.40936	1.84669	1.80115	2.8379
			29.4283	17.8492	4.69536	2.20921	23.3869	2.21734	5.51479	7.91993			4.11369	10.8426	2.87701	7.81839	2.57496	1.3644	2.21567	1.51196
			18.6872	17.9561	1.70136	27.9052	17.2224	23.6801	17.9472	2.38104			1.86569	40.6202	3.27419	15.4873	8.44661	8.73861	1.22894	2.58715
			33.5213	15.454	30.0432	48.8942	1.06762	3.36348	2.43431	8.48096			9.559	4.83484	1.22764	19.5753	2.73818	1.11345	1.8239	3.03806
			51.9771	10.6131	3.61865	14.781	5.20501	1.90252	7.1802	2.43536			1.15192	12.9175	1.51433	10.0381	12.3904	3.06877	1.82797	3.02243
			16.6545	9.60922	2.40112	25.0335	2.44278	19.9002	18.4991	1.45764			3.19015	5.84297	3.2648	3.74101	16.2904	2.89225	1.40369	2.63849
			1.33162	2.21626	19.8322	9.11157	12.4003	2.75898	2.45301	9.43114			8.40708	15.9828	14.8985	9.11637	3.61447	5.21872	1.2834	1.06923
			2.25258	17.0748	62.7981	33.6188	92.7624	28.5805	6.85752	3.70028			10.0788	11.3032	2.07688	7.9936	2.07036	13.2301	1.76782	4.30298
			22.012	21.4028	87.4837	76.1989	54.4912	1.01991	4.72232	7.30383			15.0551	5.77218	4.28085	2.18343	4.30251	6.93415	2.57574	1.4941
			2.7038	12.9531	24.5355	15.1734	58.0809	17.268	9.07725	20.5112			3.38417	2.02534	11.0856	4.96809	5.0281	1.81702	9.43001	1.1243
			32.5237	5.90577	37.0133	68.4707	4.97166	32.2432	2.80007	2.24562			5.71807	7.81674	7.90239	12.4161	6.05076	1.03348	2.12382	3.77618
			16.6775	17.7307	6.59387	9.73209	21.3196	1.39055	4.71581	7.7034			7.52363	11.2102	23.6248	4.76065	11.9523	2.28775	1.78977	3.63927
			18.0101	17.4809	54.5751	1.85123	72.5127	6.01936	3.96642	9.03902			1.12328	24.021	2.84812	11.0677	2.77044	3.71351	2.69359	2.49488
			2.99827	5.70477	16.7024	43.7921	20.0441	10.3892	4.49474	4.76877			14.9742	5.46226	20.958	3.19486	11.2016	1.46498	2.4335	2.39145
			15.6273	10.0699	21.8072	22.1731	12.0191	4.78219	3.47712	3.35429			3.48081	9.07462	9.85361	4.24145	2.60433	3.8518	2.19616	1.2493
			13.1599	20.9519	15.313	21.3949	21.8933	15.0059	9.29264	10.4989			2.59594	7.38195	7.34128	4.40905	3.03814	3.62197	2.12951	4.59168
			20.154	3.24974	17.5552	6.64515	33.8699	5.95348	4.37932	7.73242			2.62385	6.32226	6.99321	6.06098	1.014	1.71895	2.79844	2.01198
			25.6999	22.1882	86.6114	35.8323	1.79202	86.5884	11.896	2.42122			1.7354	6.78081	2.994	1.10578	2.3554	2.56737	2.01654	1.57
			36.8891	4.79212	12.9198	20.7922	11.7274	35.828	2.11488	5.68919			5.74957	7.21157	20.958	2.33461	4.72477	2.35011	1.41751	2.17791
			4.73603	17.927	31.1806	37.0014	8.57892	8.28699	4.26797	5.70184			3.92683	16.4247	7.28568	1.28509	1.94711	1.99706	2.86021	2.46214
			24.6307	5.54094	137.192	9.46611	4.1119	5.24638	17.8497	2.78358			5.15965	4.17253	9.87527	8.49931	3.21147	1.45543	1.68004	2.13028
			107.949	6.19159	27.8429	66.295	4.55707	11.8919	4.86618	1.14141			3.16796	4.06384	14.0882	16.0376	10.0235	2.7625	1.07776	1.08114
			68.9606	5.60659	16.841	98.9766	7.91286	1.93018	3.45436	1.73295			13.352	2.78877	2.11587	2.54616	1.08718	3.16332	1.98971	3.60281
			51.7067	2.82798	18.3929	27.5985	3.31727	15.627	7.83449	1.44276			5.64935	2.77411	9.86228	4.29244	2.28607	1.40313	1.30941	4.77472
			15.8437	3.1382	19.2436	34.9374	3.01992	9.93453	1.71987	2.49488			6.49485	9.23741	28.1252	62.5934	1.10018	8.12254	1.05744	4.65419
			5.78169	9.00854	21.0049	11.2116	13.9725	20.1155	5.14497	1.74113			9.16309	20.3824	14.2385	3.23646	3.95391	5.91173	1.62802	2.35425
			5.21729	3.85682	26.0122	2.37693	4.11247	9.92045	1.72962	1.09602			1.28938	7.18629	15.1556	6.51747	1.53207	3.31268	2.91223	1.11239
			13.5981	16.3353	30.5596	47.069	13.6219	137.261	4.81173	7.83287			2.19573	5.56591	15.3014	2.04631	1.21237	2.20929	1.89299	2.36541
			17.1112	6.07482	17.3263	16.6301	5.90392	3.00842	2.11244	6.7934			1.60367	1.19215	3.78185	17.5928	7.87846	3.22015	6.05773	3.26202
			28.8649	16.3196	16.2792	9.24957	14.2602	2.80776	2.35303	5.90125			1.77763	4.08204	3.50094	1.03311	9.52609	1.91408	6.94124	1.30511
			23.3506	4.38779	1.38434	7.23344	25.0798	6.76317	6.24793	14.5392			2.27663	6.38343	10.4602	36.3805	1.60092	2.42504	2.67164	1.39514
			74.0462	28.2212	30.4317	2.96021	21.6288	29.9112	2.57411	2.97332			3.72136	8.08015	1.77502	11.5154	1.18203	1.26382	2.98782	1.47476
			43.088	67.9582	20.1874	6.71368	25.3341	40.2038	1.64753	7.44298			2.12056	5.07651	10.3873	25.6849	8.28098	1.0712	3.56165	1.93906
			6.71017	36.0254	23.505	11.3893	35.24	149.536	3.02927	4.58573			4.82317	1.40146	30.9177	11.2898	1.7054	1.65106	2.23193	1.30436
			22.04	12.96	61.7185	21.6781	2.84718	57.4602	3.09511	6.77256			3.25601	4.08457	18.3727	8.00063	33.3045	8.34382	6.0935	1.95096
			23.1974	29.8245	4.21441	40.2282	20.7124	36.5079	1.98402	8.38721			12.4062	12.8796	3.23736	7.06772	10.6109	3.99664	1.89137	2.02537
			14.7319	20.2943	12.4844	9.55717	44.8186	74.3219	1.95558	1.63399			3.78651	4.95567	22.777	36.7362	12.6374	2.40241	4.5687	1.73667
			36.3012	23.3994	2.25452	36.7442	42.7156	14.2676	1.87836	17.4679			6.01804	7.24292	10.9484	17.7165	9.44086	1.54344	2.52047	1.61613
			2.79594	2.12099	26.873	35.0907	20.3624	2.18214	1.2834	3.73302			1.48554	3.8424	15.3375	11.846	5.26114	1.72549	2.1921	2.69801
			9.02684	9.78525	27.6046	24.9155	1.3055	63.4142	1.48903	1.61911			4.76876	2.09512	14.9599	5.56347	9.88961	1.26633	2.68953	2.45619
			14.2056	6.35018	16.5399	16.5572	7.94854	28.8973	1.81496	2.78805			3.9927	2.90151	3.83818	21.1258	8.46057	1.82105	3.10811	1.61167
			6.921	7.22681	39.296	8.79052	17.5039	20.3136	1.48741	3.98824			4.85539	15.0379	11.3398	3.77969	2.58603	2.49595	3.15038	1.84307
			14.2692	4.39709	5.25069	33.2849	2.35273	20.4675	4.13304	4.58201			5.38087	2.40706	25.1218	27.6374	6.73158	1.9855	3.95098	1.43309
			52.6858	16.0402	1.8559	39.8405	16.1423	2.8495	7.48093	3.37884			2.4463	2.45913	11.4459	18.7455	7.52072	1.56054	1.74181	1.79024
			36.3618	4.05027	1.59593	50.798	40.1935	9.1173	2.8342	1.33413			7.81715	2.15275	6.75563	6.91887	4.55095	2.79016	3.27311	3.30518
			85.8705	18.4685	2.01622	18.7288	3.61066	24.9671	4.10703	2.22106			4.97709	3.172	1.16337	7.1228	12.5931	1.02242	1.22975	2.38327
			54.0114	6.03241	7.88722	7.81264	1.46975	10.184	8.07833	1.10123			5.10596	4.71148	14.8422	21.0666	13.2446	2.12279	2.70009	1.59381
			83.667	14.3874	5.5186	4.88404	2.71465	18.483	12.0919	5.99873			5.01718	17.7655	18.1438	14.3306	4.02758	1.64905	3.0821	1.01492
			19.4564	6.31939	34.1284	12.5731	5.59581	10.1156	4.60446	1.17043			5.51332	1.94547	21.1609	7.32556	6.86398	2.60861	4.2826	1.53726
			45.312	5.30044	21.6527	24.071	34.9551	12.4486	4.06721	8.35819			9.39648	9.6434	12.1276	9.87641	2.34096	7.64829	3.13494	1.58265
			41.4449	17.923	17.2801	19.8897	2.69936	23.5499	7.85482	2.89966			11.0975	12.2567	12.1442	2.30825	20.7191	3.63354	2.40668	1.38026
			70.6563	5.12441	36.471	43.4331	6.32077	38.6367	3.95667	6.03147			12.1735	2.26903	6.79462	4.71552	2.93703	1.84066	1.69467	1.42193
			6.45025	6.70397	57.7142	72.6873	13.0697	8.06571	8.37907	3.81189			9.73153	1.90704	1.35763	18.4443	8.92231	14.7896	2.82201	2.4733
			24.0703	46.0099	76.0768	38.2969	1.3055	62.3611	4.35656	6.70337			7.05685	7.87387	3.97249	1.82362	7.5188	1.99556	11.9391	1.70021
			8.12792	17.191	16.1059	16.8429	3.86949	17.8046	4.86212	4.40934			1.16553	1.43331	10.8444	22.2984	15.4348	1.84418	2.96019	1.44648
			2.28213	8.94405	65.0432	10.3701	8.92384	3.53749	4.7532	3.07882			7.86584	17.3782	12.6014	57.6347	1.12907	3.32475	1.90681	5.04854
			50.2514	9.65395	14.71	8.36589	18.8819	4.16814	5.74725	1.29077			8.57317	9.65654	3.61503	19.3696	22.7225	8.71296	3.38365	2.43312
			35.2866	36.1207	19.006	4.43031	1.55187	29.8549	11.4262	7.92387			8.47437	2.48896	12.4649	3.25463	33.0705	4.7309	4.20376	1.02087
			67.3441	9.9543	14.8162	26.5108	4.42001	6.09127	10.1388	2.12867			12.7277	7.28386	22.0513	14.4566	9.10672	5.18905	2.74398	1.90706
			26.7696	23.6086	1.91223	4.85525	3.35635	16.8204	7.04121	2.12556			2.44774	17.4202	5.48321	19.6462	3.23555	1.80898	4.21839	1.10569
			34.1929	3.96487	12.163	13.3313	3.64917	64.2843	9.72586	2.91436			6.14405	2.89696	1.38651	37.1007	2.49359	1.00633	1.94095	1.17713
			12.8484	1.91999	47.8043	12.8826	2.95932	2.79519	7.30374	5.00874			11.6982	10.153	2.90301	9.63088	1.47092	3.65265	7.94666	1.099
			6.93553	1.46395	17.9394	30.1494	10.8886	58.5662	4.98404	10.6239			25.0702	4.70239	3.29946	12.4325	11.9735	5.15837	2.92361	2.12359
			16.7852	3.94919	28.7116	51.0064	12.0231	1.41318	8.17506	4.12172			7.7878	25.8679	2.87556	15.594	4.2168	19.5065	1.85154	1.75006
			30.2491	13.631	19.8509	5.68949	16.6617	6.67415	14.5945	2.17076			2.75845	5.57501	19.1302	4.18989	1.81133	2.54323	2.95531	1.10123
			37.3298	2.57353	50.2104	4.6531	26.4849	2.11173	14.2661	3.86139			3.2238	2.22707	2.42422	2.59421	1.50992	20.2467	3.22516	2.54994
			4.53922	14.7813	29.4865	6.32034	4.93088	6.67968	10.0542	2.83018			12.3676	5.8551	3.78546	3.25346	13.2648	4.19781	1.81334	3.79776
			1.38971	11.6413	24.7745	8.83808	18.9436	18.735	2.85452	3.24874			10.2363	1.75132	11.4488	3.42399	9.74323	8.116	4.57601	2.96142
			1.8264	8.31839	56.9047	49.868	26.6362	37.9186	6.17722	1.74207			7.936	3.14823	1.39373	13.7311	3.81573	6.89392	3.54865	2.20841
			10.1607	16.0262	25.1139	6.47648	9.59103	43.5452	18.5536	3.64626			10.3787	4.02743	10.7433	6.5163	2.41029	6.33318	2.03848	2.2099
			3.08791	22.4513	79.5229	21.6277	5.05605	15.5038	8.66354	3.8723			10.9035	7.16606	58.6942	32.3782	1.76896	2.23545	3.23816	2.69429
			1.24498	10.5224	18.8291	6.15699	5.51991	3.75122	6.63563	4.49196			8.1966	11.7405	1.02111	3.38238	17.8234	11.6867	4.28991	3.5351
			29.7818	22.4386	7.394	3.37827	1.35534	8.86836	4.19157	2.06788			7.3067	10.4286	5.46083	36.4702	5.26065	1.24722	2.27175	1.54172
			14.6883	26.6451	8.09159	18.9131	1.58925	5.60244	10.2265	5.47407			6.95804	13.8938	2.58454	1.3519	1.04337	7.26105	3.15932	1.45987
			13.9081	16.3492	6.0176	18.7676	52.8068	22.0562	2.13602	1.04212			13.3727	6.85261	1.57499	1.23528	5.43399	1.96337	4.17125	3.11693
			41.0968	7.8792	10.7902	6.14009	8.00858	45.0997	3.73721	6.93397			3.41137	6.80103	13.2	4.4571	1.15314	2.54222	5.04012	1.41597
			3.25417	10.0048	16.2388	65.8291	22.812	6.83257	7.79467	1.23465			8.73998	6.14479	10.2854	3.0384	1.55037	5.36758	6.12113	2.73819
			11.3195	9.83056	3.60998	13.5691	1.49694	2.21834	4.38176	2.61037			21.2479	3.32013	4.28952	10.0411	1.43914	6.64347	2.32133	1.33933
			26.6864	8.7111	19.0602	6.21488	1.28568	8.11751	27.0066	2.18557			23.2081	11.1692	1.41467	29.3567	3.66888	8.49922	3.58685	2.49711
			158.223	6.2247	13.7236	43.5774	1.99875	2.07854	2.7643	3.81384			12.2373	1.91513	1.46523	19.7517	6.3671	1.26332	2.82689	1.71658
			96.8865	34.6899	10.3165	28.9575	38.2435	29.7629	1.68573	3.13962			3.71564	14.5187	16.4879	2.07385	10.166	1.27941	1.74506	2.93612
			38.6725	11.9579	11.6149	14.1771	1.09764	11.057	19.7557	6.49281			3.0076	5.75146	23.2399	3.47849	10.1992	2.72931	1.51748	1.52982
			8.60368	2.31095	33.3997	21.2663	11.003	15.4299	3.43648	2.92293			5.35295	6.21052	2.06604	1.25345	21.1692	6.16973	4.18181	7.16172
			75.0899	5.10466	3.40706	11.8593	3.06467	10.4686	18.6723	2.45838			15.0652	15.3145	33.6669	12.4185	4.93084	2.75747	1.02087	2.77689
			10.4907	1.61441	5.02321	45.9678	2.419	1.72499	3.74941	3.29239			13.3591	3.19323	2.08699	19.5794	22.7774	4.56695	2.30101	3.68466
			8.71535	10.7432	16.81	36.6175	6.11914	2.75697	11.9171	4.71488			31.0796	7.01388	2.1166	10.804	3.71366	8.06822	2.28557	2.11764
			14.0784	18.11	6.25326	27.5312	10.6502	7.54871	12.8982	2.38589			29.6363	1.80188	9.83628	4.59188	1.90907	4.32303	1.74588	1.05956
			46.0332	11.5362	13.0341	14.6271	4.81138	18.8145	30.4642	3.53324			7.94531	4.11641	27.8133	8.58663	10.9238	15.4384	2.66027	2.35872
			23.4678	10.4806	46.3974	7.61582	12.1845	56.8044	6.60555	4.25423			8.9254	5.72719	1.8299	19.2899	11.7342	13.5213	1.36143	2.355
			12.88	31.7463	8.42012	31.2628	41.0777	1.0707	3.85995	7.08207			4.03637	1.78317	2.94272	4.89426	2.20999	6.55244	2.64157	2.22404
			6.97759	8.71575	14.5638	12.7173	44.0313	26.1841	5.77163	8.79062			7.10052	6.26462	3.57315	2.8251	18.3507	12.513	3.99568	1.20019
			1.31559	10.3482	10.1562	23.11	10.1478	2.23444	4.9564	5.96356			2.01819	1.89238	1.14531	1.75038	11.8791	12.2263	2.07018	2.28356
			26.5482	40.0862	1.92154	7.73285	2.50622	4.84707	1.39231	4.78503			8.61255	6.48404	2.58021	1.08527	5.74165	5.57931	5.44489	1.55809
			39.4803	8.81683	34.5018	5.44009	9.35032	8.66417	3.67626	6.53723			4.98068	2.32414	3.74502	11.9725	7.45091	3.36247	3.27636	2.09085
			5.86933	20.7666	5.12613	12.6582	13.5647	32.5264	4.80929	12.4478			4.22108	25.6793	3.3399	1.08703	3.23266	1.21805	1.93607	2.86171
			87.5361	5.8866	7.38037	3.65959	38.2696	22.6391	1.96696	5.8256			3.04625	9.52964	4.36679	1.10754	2.48973	6.71488	5.30509	1.12206
			10.2959	15.6782	19.7968	25.9078	1.28398	24.261	3.96398	1.36403			1.98883	4.73626	1.01605	15.0777	5.54762	3.23674	2.95043	1.10644
			4.49414	10.3737	2.92903	15.9432	2.54247	1.70487	3.06666	11.6637			9.18958	4.72564	28.3577	6.88782	4.62702	2.70064	2.76024	1.00376
			29.8129	1.16303	31.9108	7.29883	19.7949	2.17107	2.89191	3.08428			17.2315	6.75048	4.55165	2.36567	8.56168	4.76308	4.79547	1.59753
			19.1029	9.09916	12.1389	76.0537	23.1705	39.461	1.95964	5.59488			3.43285	5.67916	5.63487	4.61766	3.08581	2.00461	1.91575	2.32821
			1.27453	20.6708	26.1832	4.15619	9.53603	68.65	9.00329	2.30405			21.7333	3.11739	1.55982	1.89043	7.30502	7.34202	3.9591	2.90933
			2.203	14.7354	34.6806	3.76254	1.78899	11.0686	2.70009	7.12883			5.15607	4.51228	2.45239	12.7414	3.29333	5.83278	1.68979	2.637
			6.78779	9.66615	6.76809	9.90545	11.078	12.7679	3.9713	2.594			7.83577	5.0851	2.1202	1.30385	3.37903	1.78986	1.94582	1.47178
			5.44065	52.4635	1.07873	2.87917	2.22145	8.14215	2.78544	4.04378			29.3235	3.64673	2.00322	1.52594	8.8082	38.4205	1.2899	1.36612
			2.99075	8.78546	6.21629	26.2157	3.83173	16.8395	1.62233	4.54964			3.42998	3.70488	5.3229	1.13508	23.0865	5.23884	1.94745	1.26939
			6.68913	15.3814	1.13787	51.0286	4.98699	14.6659	5.57168	3.25887			2.41338	6.18221	2.0451	5.99242	6.43643	12.6885	3.32269	3.4525
			2.74537	8.11564	1.97128	5.9392	4.26602	23.925	1.87023	1.22218			4.66137	2.66541	1.82124	17.0942	10.0461	22.9001	1.21675	3.8424
			16.9419	2.76466	20.0361	1.68507	8.04957	22.0985	1.08426	2.77328			1.49699	7.91027	2.70153	9.62092	1.78726	9.04639	1.90112	1.15852
			86.188	4.07467	6.69012	9.3278	3.17054	2.66493	1.94176	6.00877			8.62973	2.67602	54.4797	13.1463	4.42721	8.74112	1.89624	1.12504
			7.28308	5.42127	2.70791	2.9405	21.3039	6.4579	1.03143	1.0772			10.5849	4.25141	11.0372	3.71289	1.8094	1.57261	1.37037	1.4435
			4.42954	2.60723	15.8375	10.0844	3.02598	34.5224	1.61258	1.88782			1.96664	18.2681	12.1876	13.1123	2.48877	1.00029	2.71147	3.30071
			34.4257	5.63157	12.8271	28.372	2.91375	37.2819	2.11001	2.89175			5.87128	2.66945	21.6144	3.71991	1.03037	1.14362	2.64157	2.75903
			6.5419	9.41809	1.5539	18.3317	1.33519	28.92	6.69171	1.54877			7.44703	3.36159	10.4154	31.9029	5.11428	8.86081	1.40694	1.1496
			16.0465	6.28396	5.68197	46.0232	12.4425	7.61812	1.49635	2.5979			2.6167	1.30793	6.36351	5.24937	4.51195	14.5095	2.56354	1.97031
			14.3708	4.29078	27.0246	16.0243	7.04497	16.9914	1.92875	1.02887			8.3183	3.48646	11.9587	18.2814	1.83637	3.24177	1.83122	1.08932
			22.957	2.17037	23.7159	7.39928	12.8865	15.6637	2.10513	1.12552			12.8573	3.5254	2.31085	3.74277	6.10084	1.96538	3.05772	2.0343
			28.292	1.1793	9.43298	21.9697	4.16843	49.5474	1.61339	1.93771			13.7722	10.9559	2.97594	7.51601	7.57705	1.08881	3.3617	2.11168
			26.2227	1.0724	43.7291	51.7809	10.002	2.37676	1.20456	1.44432			12.4821	4.92736	16.1095	16.3904	2.91392	7.01713	2.40424	1.38993
			14.4284	2.22788	35.2149	40.1854	6.19347	16.2134	1.24601	2.06476			4.00129	4.19427	4.03966	8.33758	13.533	11.1707	1.51098	1.05361
			20.5401	1.73931	5.89234	10.8339	1.6054	17.9494	1.23626	2.29002			11.8793	1.36759	2.18881	1.82187	1.23018	1.24773	1.7345	1.5194
			6.22339	1.24204	27.7263	17.8802	2.12447	24.178	1.53943	2.3929			4.11226	21.1721	6.38806	11.3332	2.98614	3.49071	1.72962	1.23144
			1.29756	7.07519	18.8008	5.38064	3.90371	31.4939	1.28909	6.80614			1.2815	1.51724	6.36278	3.17787	2.46662	1.3815	2.03442	1.4383
			36.0293	13.606	34.4211	76.524	3.47186	2.40845	12.517	6.47566			7.75344	7.19639	28.9217	6.56904	7.20246	2.41398	1.67029	1.39514
			9.08394	43.7507	55.7645	38.9994	1.40472	15.2674	11.1921	17.1323			18.2396	11.6965	15.3953	8.95288	3.37277	2.9018	1.97427	2.62956
			2.55807	14.1074	6.90116	37.9402	7.59637	29.7246	5.20593	9.4664			11.0982	11.962	18.5475	43.4418	3.5957	1.14362	2.42374	1.78801
			9.94631	44.7888	10.4465	23.0527	12.5321	23.8154	14.0971	7.97454			5.40092	2.06883	5.97788	2.97687	1.15266	1.76623	3.15607	1.69277
			19.5916	52.6256	26.8647	35.1086	3.39012	52.2345	1.05013	1.866			5.09952	2.00361	2.64954	2.62351	10.7202	3.58727	1.15742	1.49187
			9.27975	8.26959	5.05019	6.67675	5.59816	71.5468	2.1604	2.82082			3.12071	12.8665	10.9722	6.58838	3.05307	1.55702	1.64184	1.99486
			11.5474	13.1146	17.7684	8.22413	21.768	3.37303	8.66435	1.62749			3.07775	7.30712	18.1561	3.77148	2.79258	1.34328	2.51722	1.1429
			15.4611	10.7699	5.23233	6.17827	2.61243	3.39566	13.4346	4.43584			10.1103	8.97855	72.4726	7.82776	6.65021	2.07703	1.49716	3.60206
			24.6622	7.0932	19.8519	12.0364	7.96417	1.96136	6.82989	3.11935			12.0082	13.0545	2.18953	2.0258	7.04695	1.28142	1.22894	1.61538
			6.30052	23.6202	5.78278	26.176	15.0701	2.7459	1.93851	3.50986			2.41051	17.535	26.2347	8.64406	3.86484	2.08206	2.20835	2.96737
			1.39221	11.4502	4.5777	10.0118	4.33983	2.01215	18.6446	2.15362			10.2542	3.74785	8.96249	2.1008	1.49981	1.14312	1.93525	1.33338
			27.0655	27.6989	3.87333	17.2991	17.7009	1.36943	4.31673	7.07271			6.64233	5.35559	8.40211	6.90775	1.11078	2.61866	1.15173	1.55214
			6.96507	8.95625	17.1911	27.6329	5.48654	1.36138	8.48635	2.94398			19.9127	3.18716	8.2584	14.8439	1.42047	18.3241	1.37687	2.62658
			7.59557	28.6284	19.5898	36.8127	44.9652	50.5693	6.22029	13.1181			7.12701	5.63719	3.4049	4.92707	3.0018	10.792	1.21431	1.46434
			12.5214	17.8544	43.5322	2.49772	11.8502	13.387	7.62317	2.80991			11.2693	3.77212	4.3314	1.38823	1.91719	1.85474	2.69522	3.65341
			2.75388	9.88342	42.188	2.02709	14.0058	9.89228	21.6259	3.1973			5.18328	10.3042	16.0944	5.92444	2.50962	15.0476	1.83122	2.02686
			18.6517	3.86669	11.1731	19.5105	4.42522	27.3232	21.4569	2.38044			2.69402	1.09053	1.6992	15.9139	4.05809	1.61737	4.12654	1.4822
			11.2584	17.5128	10.8753	7.79825	1.36813	19.1514	9.59094	1.87613			4.44373	31.7053	8.18403	13.1164	2.78828	2.25405	1.6711	1.29097
			39.6991	11.7842	15.3603	27.2552	8.39724	3.92925	17.9115	2.66571			18.3448	13.235	10.1771	4.82687	1.74501	2.20778	2.18803	8.93112
			8.13543	4.34655	23.3986	3.20335	7.06022	4.08314	12.213	2.83953			4.39004	4.28376	1.83135	23.2964	6.75745	1.24571	1.36712	5.21894
			7.96917	6.10677	18.5554	8.70697	3.18152	14.4366	5.49853	2.66338			6.2049	11.6657	25.1514	16.2896	2.67613	1.53539	2.05392	3.70177
			33.2894	5.81457	12.8862	13.7062	6.99007	3.20254	3.37552	2.64077			3.17153	5.64326	7.52038	26.8241	1.64646	3.5747	2.15471	4.46296
			9.51913	6.05449	6.78355	8.5987	6.00256	1.14362	8.11735	7.15612			8.64118	8.17621	7.75363	12.2819	1.29077	5.15485	3.84044	2.83716
			5.15069	1.31233	16.0633	5.86942	8.98524	1.20146	34.4103	4.37426			8.49227	3.10728	1.79235	2.55905	2.57588	3.28402	2.22542	2.41601
			20.8481	6.36877	33.087	41.2443	7.57319	16.9567	2.57655	2.97983			8.83233	4.46476	6.2263	14.2128	3.52683	1.38904	2.31321	1.85572
			1.90853	5.466	27.895	7.47501	9.06941	1.16877	18.3252	2.85902			3.80512	2.58452	4.78346	1.49136	3.13603	5.56221	2.24168	4.88634
			9.42548	7.6294	78.5441	5.69074	1.60174	2.73886	2.43187	3.527			9.67712	8.59078	5.7468	3.02609	1.09877	2.50651	1.03875	2.12433
			24.818	17.4739	1.86038	22.0749	5.9257	28.1465	29.0175	2.3703			16.3796	5.96835	8.03454	13.0842	1.08688	1.17279	1.92632	1.71137
			66.0655	13.6833	37.5222	10.9531	4.49048	21.5402	13.4899	2.24247			2.2974	5.03353	29.142	2.39146	5.73344	1.45392	1.55406	2.01942
			8.81501	36.1451	13.9045	11.9416	9.30241	6.53887	23.9074	2.04917			7.16137	14.3185	8.61514	6.94525	2.73617	1.27589	2.56029	1.95915
			2.71982	12.2257	6.22637	2.16008	3.0821	3.74619	1.99703	6.90591			1.88932	16.5011	13.8124	3.09231	2.33574	2.93248	1.99622	1.91153
			3.34331	4.54871	14.3555	6.24336	14.6596	10.6441	23.0825	1.74986			3.32904	2.91719	11.3824	2.10666	6.39553	1.12049	3.62261	1.84828
			23.8875	27.8802	13.9031	67.7789	8.37406	2.1761	2.88134	2.68598			7.66467	5.93195	26.1372	4.17875	2.83585	1.87637	4.75808	1.11983
			1.16886	7.98551	10.8088	1.17877	19.3044	73.1129	5.22056	1.28297			5.48826	3.78627	8.28296	3.95373	1.76313	1.73203	2.51396	2.21809
			1.98165	11.944	20.8198	14.7072	1.47548	26.077	12.0651	1.56357			1.66738	3.57798	41.2537	10.7085	7.62117	2.68404	2.62857	3.18464
			15.4315	24.4649	11.6953	9.40509	2.67038	40.495	6.76811	2.21285			1.61942	24.5215	9.4521	5.21597	12.4688	1.07925	3.08454	2.90338
			9.59225	11.4955	13.5133	49.2775	11.8142	64.0127	7.23791	3.88243			4.54324	15.6421	14.3648	1.41636	4.78022	5.47169	4.79222	2.5559
			60.686	13.9988	1.2649	22.8468	8.15875	26.4104	7.04853	1.23231			4.99213	13.0035	2.16931	23.6573	3.87629	1.20699	5.44651	1.94278
			21.1962	5.11628	3.255	39.2507	11.9679	17.7035	1.44758	2.62206			4.52176	2.64266	8.40572	3.5699	26.5325	1.83764	1.30372	2.28729
			19.1865	4.5551	1.61776	55.6451	21.3399	144.298	2.24655	1.25257			1.32088	10.3204	2.4199	17.3784	13.8825	2.39889	3.78842	2.00974
			46.9431	7.61546	2.33691	27.622	4.62711	38.0051	4.09484	7.08597			10.4503	14.8746	3.12543	3.85704	9.32427	3.10397	6.83476	2.75159
			25.5656	19.8191	4.79815	11.9945	2.31295	17.3198	14.3368	2.05696			1.30298	8.17621	9.3084	3.88868	1.35761	1.3639	2.32215	1.64812
			111.307	8.76803	15.576	8.63093	6.25569	42.387	3.04147	2.44045			4.62486	6.18625	16.9624	5.41052	2.44052	2.67197	4.06396	2.11317
			41.2881	4.81304	42.2821	24.9559	16.753	24.9978	27.6268	10.4165			2.43056	1.38832	9.65719	6.58369	1.51506	2.57742	2.99026	1.02087
			76.2552	16.0024	41.3693	3.42177	26.9533	2.47986	23.4856	4.81933			1.30513	3.47686	2.22492	5.76622	5.84898	1.2603	3.71852	2.03281
			42.3203	5.93307	41.7874	11.5326	2.59719	28.6253	1.76782	3.74759			9.29554	1.83221	2.17581	5.39235	31.7879	1.35082	4.03713	1.29841
			8.34427	2.16804	30.8355	8.027	5.48288	32.7134	6.4625	1.28531			4.28623	8.31221	3.4179	15.8149	9.10848	7.95406	4.19482	1.72848
			24.4103	4.65038	26.739	9.28681	10.5132	29.4033	10.5858	2.86915			3.72709	8.03262	3.39117	2.99796	8.96689	1.41168	1.87349	2.355
			20.6889	29.3168	10.6481	16.2915	7.00959	5.89363	21.9844	2.93306			5.08735	6.90721	11.1354	4.6833	2.74013	1.04455	2.95368	3.77097
			8.07233	6.51342	24.8282	7.54072	4.83328	21.7188	10.255	10.2225			13.513	5.38845	1.17203	10.1173	16.2392	1.83814	3.97455	1.78057
			10.2228	1.38088	8.80859	57.4992	1.99455	7.29877	10.3029	2.5675			12.1836	3.38383	12.1269	8.51924	1.50486	1.97745	1.91494	2.24041
			14.3238	6.59127	7.90999	13.3466	5.76468	48.8338	3.58197	2.57218			3.56386	4.19933	2.17798	3.31909	6.69231	1.49466	3.44949	2.17344
			20.4725	3.11729	22.3804	9.85131	1.6609	5.9399	2.82039	4.6385			10.1289	4.79541	10.4198	22.6019	1.02231	1.27941	3.40153	1.38026
			5.61192	18.0688	21.5302	15.1353	6.11906	9.87921	3.05528	3.72031			2.5673	2.35397	12.5198	2.72724	1.69743	3.55157	3.63155	1.7523
			16.5844	18.1902	36.8562	3.26249	3.78416	3.94685	4.05014	2.51684			6.87643	8.76622	5.14886	15.7745	15.1251	1.28494	4.26472	1.67491
			41.0092	12.6771	7.28023	33.4467	2.14887	10.3022	3.92903	1.71634			5.58061	9.86939	2.3679	1.70233	18.6859	1.02343	2.71472	1.0365
			13.5821	16.197	47.8699	21.7194	3.22361	34.6768	4.93446	3.0227			2.61097	3.04257	53.2774	10.1448	9.35938	2.69108	2.10106	1.26344
			9.08694	10.2244	8.52228	14.6052	2.5429	12.7669	2.87403	4.06326			1.2994	7.06343	2.2242	1.06769	1.32079	4.47039	2.29695	2.97555
			49.3615	13.1314	5.19738	4.03352	5.41151	4.1616	2.63344	3.24406			3.93113	1.42522	4.79429	23.7986	1.78975	3.62449	7.47118	1.19201
			7.41129	16.0175	10.554	24.8454	6.47893	16.9708	6.65026	2.00942			11.9817	4.54363	1.92812	20.9014	2.79224	1.12753	2.69115	4.56713
			8.57714	14.18	6.84336	12.5925	3.87504	9.55232	10.6411	3.60183			1.92512	5.81314	3.36662	7.05893	1.23074	2.22941	6.58767	1.23888
			2.24958	11.9608	19.3042	6.41953	21.1093	1.41972	1.41019	1.07564			2.5809	1.90856	6.08331	6.09379	1.54621	6.38145	9.25038	1.18233
			8.05631	21.6589	2.1709	16.5184	19.9412	1.52282	2.37904	2.74833			2.49785	1.51926	2.00105	4.99563	1.28001	10.5315	4.14605	1.45318
			11.927	35.4695	35.6881	9.68828	4.69421	1.76321	4.0794	2.7078			2.19001	3.97485	3.38106	6.71613	4.1238	7.30027	2.20267	2.65263
			38.9159	9.11775	9.29654	36.5552	11.483	10.962	7.99787	2.19571			1.63875	2.86157	1.28252	3.1181	6.3995	2.0559	3.47712	1.39291
			1.92656	15.0874	18.206	5.44698	2.92778	13.5233	3.60798	3.97597			1.21206	4.53453	6.5982	3.75859	5.95772	2.50802	2.62044	1.75081
			1.60205	29.5556	46.1225	5.86535	10.1509	16.9099	1.46302	1.38664			3.58033	7.38649	2.46467	11.3965	1.46182	4.36427	2.54648	2.23074
			1.67967	11.4165	7.12094	13.0759	7.24931	8.90859	9.68278	2.03124			2.93671	1.02481	4.12343	9.68479	1.61134	6.59771	2.65539	1.40035
			4.09851	13.2929	28.1255	27.7083	1.54257	38.2927	2.0523	5.60268			9.60553	3.38788	4.48811	19.4288	2.60081	1.59574	3.32513	1.96287
			11.9149	1.74048	3.96676	58.1632	3.14736	1.99405	3.60798	2.01643			5.9665	2.31959	2.02704	23.3321	7.36064	14.7907	11.8204	1.06403
			42.6142	1.92696	16.1796	4.2557	9.28838	9.85758	2.50015	6.6635			1.06028	1.00307	10.0818	22.5041	1.75124	2.19471	2.06449	1.12951
			1.887	2.17385	3.41765	30.2186	4.20136	2.52261	4.33218	2.83252			14.1531	5.83791	2.43795	8.67511	15.1076	9.51661	2.30751	1.2679
			11.6425	8.32885	12.7512	18.4741	3.16749	17.1091	2.00353	3.66419			6.17769	21.7272	6.38806	6.1102	7.35951	1.36189	3.46086	1.41746
			6.67711	2.76292	5.00247	16.764	6.99495	56.7929	2.23843	1.50044			3.00258	6.20193	1.13448	11.5664	5.18122	4.9738	2.12301	2.05736
			28.4833	1.45059	1.06125	7.3489	8.17461	1.84921	2.4148	3.2846			2.05255	5.28834	1.49916	17.8893	1.92455	1.86782	1.12409	1.91525
			19.0934	6.13117	14.0382	16.7975	8.96511	37.5032	3.60067	1.02653			7.74485	3.21194	1.75408	12.0259	4.97109	1.4333	1.8743	1.61613
			125.437	2.58167	7.24931	2.11314	5.33954	6.96785	7.11924	1.18164			4.08505	2.27207	1.96422	1.43628	10.3573	2.38481	1.52073	2.57003
			7.03318	14.2154	7.63107	10.1539	13.7368	6.02388	13.9881	1.3235			11.8485	1.11227	1.1482	8.80579	11.272	1.89346	2.84721	1.41374
			8.31622	13.7362	9.15271	83.702	4.94368	51.0562	1.28502	1.23387			4.08792	20.1903	2.68131	52.6519	1.31173	11.3251	3.25523	1.87879
			27.2383	13.929	18.7309	62.9452	1.09121	9.26063	3.10242	2.07801			7.8687	3.02841	53.9461	33.0591	7.58493	2.42303	5.08807	1.48964
			28.8083	9.0765	30.5908	37.0618	3.00585	20.4469	5.91306	2.57998			7.91094	1.65071	6.87478	10.3481	2.36802	1.44336	2.09375	2.06704
			31.5517	11.0877	23.5156	32.507	8.35698	6.47047	1.74181	1.67815			11.1405	5.22212	17.3437	7.30916	2.58608	2.2274	3.95261	2.4175
			16.7742	9.421	46.5593	61.5862	7.60186	19.2882	1.6963	3.43971			1.47122	12.4807	4.28807	11.0976	18.1694	2.04886	2.46195	2.74266
			27.9179	13.0611	7.10616	17.4071	4.07327	44.9599	5.78789	3.76707			3.35911	6.83946	8.34362	3.04895	1.65326	1.76572	2.94474	2.48
			86.18	40.4533	35.8514	53.1662	5.17119	3.20657	2.63669	7.08441			7.14204	7.94769	37.9088	2.11428	1.02854	12.5185	6.47876	1.80364
			49.665	14.2764	19.7404	42.6562	1.52306	10.9806	3.18208	8.0517			1.91939	8.24749	7.61642	29.0128	2.84548	1.69431	1.35736	1.20019
			45.7632	8.83193	22.1915	21.5858	5.81835	2.54775	4.57276	11.6185			9.97996	5.27166	2.76796	13.4985	2.21567	2.76602	1.31428	1.11388
			19.7439	7.39993	13.1874	5.59937	4.38008	1.25175	2.27175	9.12812			1.81629	5.22566	12.584	28.5235	1.32192	2.72428	1.71336	1.95691
			29.8334	4.86358	7.49934	10.8351	3.62679	8.48011	5.07913	1.6875			10.8026	4.37426	20.2611	35.2091	1.61701	1.79338	2.22299	1.14588
			6.21839	14.9805	19.2175	25.741	7.04253	1.75567	1.38581	6.4133			5.81257	12.413	8.56676	3.80489	1.43067	6.59318	1.47359	1.01864
			9.3739	22.0441	12.3271	8.80397	11.2286	1.4157	3.30075	5.65724			4.04424	12.4751	7.59909	12.8937	1.38762	8.66116	1.61827	1.29915
			15.0715	12.1008	26.2604	20.9221	6.75707	9.25409	1.90599	2.93228			1.53136	18.3065	12.8462	2.46529	1.16277	8.37198	3.0057	3.19952
			39.6981	15.9699	17.7194	54.9664	4.60271	33.3562	2.05961	6.34549			9.75587	5.91678	30.7213	21.7399	3.36598	14.2742	2.23436	3.30964
			28.6941	3.58146	7.88714	15.5349	15.9296	12.4848	1.80358	5.94173			4.61842	13.1476	14.0485	16.8609	6.45784	5.89413	2.15877	2.35202
			31.0674	1.82123	9.6205	18.1668	6.06721	26.678	1.80765	8.0556			13.7099	10.9645	19.0472	1.08703	2.19754	5.89715	2.83908	5.89977
			10.1466	4.93736	28.7714	5.92011	3.90188	111.097	1.74262	6.82563			7.84723	3.76099	12.436	18.1536	6.50824	4.85411	3.21622	1.11239
			14.8917	17.4774	31.8611	3.38422	61.5114	77.3741	1.6459	3.54571			1.75258	18.0481	6.49566	7.62794	13.1898	9.61216	2.05555	1.12876
			74.875	7.59106	12.1503	36.4601	8.67233	13.6314	1.8808	5.5715			4.1996	7.54727	11.6445	22.0458	2.13354	2.90432	1.65809	4.97265
			11.7482	2.19593	6.49857	1.02168	1.11012	12.7347	1.23138	1.96187			7.20791	4.68115	8.87583	13.6532	68.0837	9.01923	1.07207	1.29469
			19.7704	5.8256	2.26701	1.03201	2.3959	21.2314	2.1035	3.91049			15.7754	4.8404	25.0525	13.9731	9.55535	2.57843	2.70253	4.40864
			12.4919	16.7768	15.4288	36.7924	2.39956	1.63899	1.73775	3.65016			8.59394	3.59011	16.3117	46.2364	4.85782	7.84493	1.71987	4.13482
			16.1397	10.2767	23.2629	4.69691	2.42823	22.3348	2.82039	3.2503			3.03695	3.04358	4.83329	5.28629	2.23039	2.96718	2.38229	3.14743
			29.6096	5.18251	3.45999	6.68551	5.32917	14.6428	1.30453	3.49037			13.2302	2.00259	16.1247	2.05275	2.12335	6.63894	1.73694	1.82893
			8.04629	3.12542	30.3636	3.60483	1.46938	77.4681	1.68654	3.45452			3.94258	2.9187	11.6698	11.5529	1.05346	5.63111	2.24168	1.60497
			9.71945	7.72584	47.1091	4.57143	1.33641	21.0263	2.42699	8.58874			17.0089	6.47089	1.04783	10.6658	29.9285	7.83085	2.6814	3.17571
			9.93379	1.07763	7.25267	65.7828	7.26211	13.3322	12.3114	1.972			2.98468	1.28771	4.35884	1.22415	2.92251	9.90737	1.29071	2.14963
			12.255	15.7654	7.08935	18.3996	7.5677	1.00683	1.92063	2.46695			5.93715	7.75506	7.34345	5.61796	12.4665	1.66011	1.02493	4.11771
			67.5619	4.69104	7.33198	1.41846	3.65545	15.5209	15.8007	1.22919			5.98941	4.7044	6.52382	4.51687	1.8866	13.0204	1.71905	1.54395
			5.07407	1.07298	24.3463	11.6099	11.9649	49.9392	3.41779	1.06083			3.49442	1.21035	8.61225	3.68475	4.49364	2.19018	1.5947	1.48294
			2.50548	1.5296	32.2509	8.22038	3.91835	33.6071	3.1325	1.32194			3.4801	8.65297	1.20814	5.62383	1.53488	7.84795	1.00705	2.09383
			14.9067	7.87107	5.11538	1.18096	3.71889	17.2353	14.054	3.42957			6.47122	9.16866	1.75769	2.36099	1.93701	4.00368	2.27582	1.80661
			3.41493	19.5205	1.25549	6.12507	6.34657	20.6521	4.85724	1.78416			8.19158	9.2627	37.0061	2.12073	3.05277	4.22446	1.76457	2.56929
			32.3539	13.1041	7.00534	45.7976	6.72962	14.7876	9.252	3.77877			18.0334	8.08975	7.63808	1.24876	4.45342	2.29429	1.30047	2.7754
			13.8931	6.54886	6.82925	28.5413	5.57315	11.1777	3.0626	1.09279			1.77406	1.98338	17.1747	3.56346	2.50679	27.6597	2.07424	2.75308
			3.51158	32.4823	4.44193	46.2804	4.50024	2.42957	6.39748	2.01176			4.06859	10.5494	23.3815	2.79638	3.48832	1.21051	2.21973	2.74638
			4.98492	11.309	6.44145	4.92096	4.79119	61.8466	4.28991	5.38833			1.59007	6.34399	3.96167	2.06975	2.62006	16.3678	1.32729	2.63626
			72.2669	26.3796	3.59105	37.5706	1.74325	7.3219	8.60096	2.93852			12.6919	1.98743	15.1801	13.9221	2.00781	5.04371	2.15796	2.74935
			3.3323	5.44974	2.27709	1.24792	4.15196	8.3921	3.57059	1.08967			2.37973	4.51431	13.8304	12.8896	1.46465	3.27496	1.7028	2.24487
			1.20642	8.18768	17.4377	41.7856	3.06868	1.81903	4.96128	3.5083			9.21535	13.7381	1.97867	14.8041	2.49263	6.76015	1.31347	1.87209
			5.43464	13.4875	32.6011	19.1528	6.46734	4.00217	11.3986	2.58621			21.1963	10.9938	14.8458	43.2777	1.88717	14.6096	1.02168	1.16224
			7.3627	13.6688	4.87477	35.1302	5.35296	9.84401	44.7946	1.36637			14.481	9.54633	12.5746	5.01146	1.82317	20.5621	4.16718	1.16373
			33.983	22.0098	1.77167	34.2934	1.67432	4.72385	6.4048	2.90189			5.27277	3.1993	15.7882	1.36303	2.23719	7.55073	3.7551	2.75605
			7.18843	24.8855	1.59692	25.7767	1.00703	16.5845	11.3328	1.8964			11.2285	5.54063	25.1442	4.04456	3.68428	2.20326	1.17123	1.67789
			28.6696	10.2657	17.9916	38.9271	1.06315	1.33724	5.73668	2.70702			4.95561	9.33903	18.0701	8.13307	1.33099	2.18817	1.84666	1.48964
			27.0941	11.1284	23.4672	45.8592	1.03875	29.6658	32.2264	1.90263			10.2942	5.33991	33.833	5.56874	3.80152	12.9731	1.71336	2.19204
			12.2365	6.87767	4.03531	31.3479	3.59873	35.6982	27.9925	2.46306			21.6302	18.6948	15.4285	6.29831	3.42658	1.64704	1.17367	1.01789
			54.094	14.503	21.7278	21.5955	3.15285	24.7725	2.25712	1.98603			5.07088	22.5766	6.96794	2.77646	2.03499	6.80239	2.45463	2.32895
			89.987	1.61093	7.29972	41.6038	11.5501	57.8128	22.6818	1.49264			3.91681	4.64121	15.69	2.73192	1.32816	1.87636	1.22894	4.66535
			28.617	17.6871	19.9548	29.8202	3.41147	43.525	3.00164	7.15222			3.60252	2.32515	1.52155	3.29214	22.7316	4.3869	1.39475	2.06034
			1.94659	6.19392	32.9324	17.9005	6.4155	194.706	3.44542	13.1922			1.9559	2.11483	7.54637	16.8955	16.7914	2.70466	1.13709	1.67268
			8.03327	12.1566	46.6118	5.31086	4.42522	14.0504	9.27151	4.19733			1.94373	8.93508	3.55799	13.5571	14.8901	11.8763	1.77188	2.5745
			59.0063	6.68887	32.7752	37.8119	12.0143	48.2776	4.88163	2.57218			6.81487	2.38431	2.16137	2.17933	1.04383	1.1914	1.58332	1.03947
			21.1747	4.7015	18.4217	11.7823	1.68957	23.7933	7.12981	2.12166			19.138	24.9432	17.3198	9.93267	1.69573	4.20183	1.69792	1.5886
			22.047	18.9228	11.1757	27.1066	18.7372	29.7176	5.3506	3.32513			11.5428	2.47025	16.8042	8.75188	2.98254	2.27367	1.36793	1.09677
			17.7963	7.28374	48.4735	24.4599	4.61613	31.7549	6.04636	4.5512			4.79883	1.56679	3.62298	4.51043	1.39215	1.89145	1.09808	1.95468
			15.4606	1.21241	23.5324	25.6015	4.18197	2.94908	4.69793	5.81468			10.6021	3.13762	10.4133	1.17258	1.70423	9.88776	1.91494	1.20317
			16.5418	25.7789	8.01283	86.8478	8.37537	6.83106	17.1174	2.62362			2.64247	9.31831	10.4097	2.16878	1.1826	1.0873	2.02141	1.37951
			9.4996	14.8498	31.3456	43.8944	8.86879	4.17618	14.1214	3.42646			10.7725	11.9155	14.8855	22.7004	2.91288	2.27165	1.78001	1.70914
			17.4467	45.7857	27.4393	27.7209	4.87975	60.441	1.36874	3.61898			12.3504	11.6248	13.0967	3.52829	2.63026	10.0582	7.02171	1.36835
			30.0042	8.08834	9.80331	18.8124	4.71169	31.4597	8.83179	3.75382			9.93915	8.11959	3.47494	6.56669	1.31513	2.04333	1.17936	1.26046
			18.8119	25.4414	38.9424	1.59839	9.35616	25.3609	12.6121	3.59949			8.4171	6.51842	5.78218	3.15266	3.60499	1.95784	1.95233	1.884
			7.43031	12.1043	14.9147	8.84653	4.8058	4.72587	3.07072	2.34146			11.6917	4.21197	1.94617	1.77909	1.34911	1.83965	2.72123	1.73444
			37.0619	15.3442	28.3467	14.2597	24.3947	10.6547	57.4457	2.73041			5.0809	10.8947	4.87662	5.80314	3.76075	2.92393	2.26606	2.69355
			22.9875	9.83114	2.9082	5.089	13.2296	91.0488	5.99677	1.63138			6.20132	4.68418	30.0548	7.07651	3.39317	1.1391	3.70226	1.57446
			12.1513	1.91824	41.2995	17.0397	3.1111	8.34332	9.06181	5.43353			8.82159	1.71795	9.13219	2.48229	1.85262	6.08675	2.30264	1.38993
			11.8248	5.34691	8.1338	3.81636	19.7435	9.71979	2.5229	1.75999			4.62128	1.28467	10.6624	1.14504	1.99761	1.3639	3.29749	2.62137
			33.4006	8.6408	43.9186	6.53375	3.27781	43.3661	2.04498	3.15131			2.50287	3.07746	13.4874	2.98449	7.24566	2.87817	2.97563	2.47702
			8.53507	5.69489	8.52967	3.178	8.86879	14.8887	10.4119	3.13728			4.15379	1.39135	1.76202	1.05831	2.09843	3.69188	3.04797	1.67789
			12.593	23.9829	26.5575	11.0241	15.1864	58.8769	17.5522	2.44513			9.63345	1.03492	3.28141	7.05659	4.72415	1.11998	1.40288	1.07221
			50.1427	48.2777	9.00283	21.0172	17.2374	10.0995	3.92334	1.06706			10.0229	24.9215	1.58582	11.9561	1.27038	3.11906	1.79058	1.45243
			10.3324	7.28437	23.7851	1.19253	2.72793	15.5063	1.85398	2.93696			7.67756	4.61492	1.87612	2.02052	1.41821	3.22266	1.23869	2.3483
			8.69532	16.5944	4.0212	1.53956	32.518	47.0897	2.95043	3.76708			5.96865	15.0253	2.14115	9.15212	1.18543	1.64905	2.31402	3.37959
			15.0134	11.091	5.79017	3.14765	6.08103	22.8201	6.18209	3.73044			8.99127	23.2581	1.24858	16.8123	11.8033	7.64376	1.13628	1.50005
			1.30307	3.49776	27.8648	18.236	5.20108	20.1426	2.01085	3.36722			9.25615	6.37433	4.79718	13.1475	2.03782	2.80826	1.65159	2.762
			9.12951	4.4806	40.1058	17.9249	2.05435	6.99551	9.27476	1.5207			15.101	2.82922	3.1832	2.7079	1.13785	4.58757	2.07831	1.47624
			10.045	1.95901	8.51959	9.30026	5.61786	12.9052	2.03117	1.81144			4.77091	4.01883	2.06027	1.42339	1.3661	2.13939	1.68492	1.51196
			17.1783	2.00443	2.58626	1.19848	4.55506	21.3009	3.74372	3.44048			4.53394	2.91971	1.91439	13.3918	3.47869	1.73505	1.61746	3.57156
			46.1824	14.8855	3.72749	1.68664	3.45999	10.3736	12.8982	2.9167			16.1934	19.9916	5.2839	6.53974	1.22281	1.98902	2.00678	3.55891
			3.459	3.14653	16.3429	21.9678	5.30527	32.2156	6.75511	2.16375			2.80212	8.80211	1.6667	3.0677	1.29927	7.83487	1.90274	2.6489
			2.30266	20.5457	1.04378	8.72011	3.61998	9.92346	17.0182	1.15125			1.00157	11.0479	3.45328	2.73251	1.06762	2.25959	1.8361	1.57521
			1.60355	7.19172	3.73152	1.86343	8.95752	15.4213	14.2369	1.51057			6.28294	9.60497	5.15103	2.40552	4.12209	1.63195	3.06179	2.12656
			4.50266	2.27875	43.5517	5.91918	8.59787	43.6518	3.50963	1.76311			4.29625	10.0448	15.131	1.74159	1.93644	6.51171	2.69278	3.32676
			3.28923	4.59141	43.184	1.20443	6.38488	16.8375	26.4271	3.26121			7.01819	8.96795	2.55493	1.70057	25.8999	17.96	2.53266	14.7446
			1.30057	2.43135	3.39009	1.07519	10.4956	10.105	21.7779	5.40781			7.41553	5.9825	9.93232	6.27252	2.53511	3.25937	1.13709	2.7873
			2.01019	7.79123	8.58411	8.65409	6.39362	20.6486	1.61095	3.12559			2.12271	3.54157	2.34768	7.9098	10.32	7.6327	2.34572	2.28729
			10.4631	1.46184	3.1562	20.0068	1.6705	20.6104	1.06476	3.10688			2.46635	7.95123	1.5786	6.52685	13.9346	3.16784	2.85777	3.66308
			34.5825	7.79487	20.9266	7.10263	10.1299	24.1026	3.19508	3.2199			5.78752	11.4372	1.93245	14.7214	8.17566	1.899	1.45165	2.15856
			51.1228	2.44104	22.8502	6.59383	22.7202	3.37555	15.6032	2.72183			4.79668	10.2531	1.67681	3.01438	20.0803	3.67076	3.03659	1.24335
			10.5152	14.1642	46.0069	3.48592	17.4008	46.1719	3.3357	5.32987			5.44173	1.28366	1.63493	1.74979	7.21904	7.60102	2.50828	1.63027
			16.0064	14.6414	8.83279	11.4722	6.15901	48.3842	1.9759	6.16076			8.94688	12.7198	2.94272	5.22183	1.86395	1.06718	1.88893	1.86316
			132.027	14.9848	22.8919	15.0311	5.17351	3.79598	6.19997	6.68767			7.74127	1.78267	30.8889	11.8712	3.82984	1.57864	2.13927	1.05584
			27.3249	6.70605	1.74411	14.5495	8.02446	1.69381	3.12112	5.3969			1.45547	12.1182	12.8101	10.9517	2.42919	1.28092	1.80927	1.81703
			27.4236	9.84229	7.42339	20.7252	2.05502	6.09379	2.51315	1.27128			12.0103	12.3659	19.1996	4.46648	6.62492	1.06215	3.23816	4.69437
			53.5506	10.873	20.4091	9.91139	4.08786	58.0336	2.57817	2.89409			1.01232	5.01483	2.46756	14.8515	15.5012	3.14019	1.50773	5.93846
			7.11281	16.3618	7.93419	42.2024	19.757	21.4276	3.66732	6.80536			1.70175	9.33651	2.57299	11.8653	2.33744	2.08859	2.08156	2.67346
			48.8236	7.80516	56.3331	29.8187	3.67242	18.9005	1.66703	5.01887			20.5921	12.5909	44.2499	18.9881	3.8525	1.61334	1.20293	2.51646
			18.6156	3.91439	33.0796	9.9261	8.04328	6.09278	2.32052	4.84583			4.85753	20.896	11.1152	6.964	3.75395	5.90319	3.47062	3.51054
			17.8744	11.332	3.48688	15.0361	2.10006	2.36972	7.87676	1.69452			2.26232	10.0494	6.82423	2.43892	2.57645	3.66372	2.68221	2.28356
			29.6511	17.8273	26.4964	22.7461	21.6762	12.4813	7.90765	5.14436			1.98382	3.95918	67.7491	2.22035	8.6718	1.14362	2.32377	2.72257
			11.6771	22.974	42.9656	19.437	9.26608	1.13859	2.49283	1.84184			3.00043	8.94216	21.2865	24.5656	2.91741	4.86518	2.83421	1.80513
			100.805	7.23108	8.34888	24.5022	15.3558	9.48493	1.23707	2.78263			5.18471	5.1028	1.78874	23.9134	1.89397	1.40413	1.65728	1.83638
			26.1531	14.7341	19.7209	11.0942	3.34235	1.75919	2.00272	2.54958			8.39276	5.23627	8.85705	17.3584	8.89156	1.3634	2.275	2.6742
			28.2629	4.10938	12.0455	20.4661	7.3213	31.693	1.72312	1.66256			5.81687	8.82941	21.9451	3.25288	3.25157	2.90985	3.88839	1.57148
			32.3499	19.205	12.7243	8.62092	15.4042	30.5414	3.17558	2.12945			8.1923	4.31561	2.80407	3.05715	14.0326	1.08176	2.85452	2.31258
			13.5771	25.426	12.6483	1.90943	3.56688	11.2426	1.08508	2.54334			18.3355	1.39438	29.415	1.0003	9.61992	1.22308	2.33109	4.39302
			23.7783	21.2972	6.66257	19.1944	12.9519	10.5903	3.30969	1.29233			7.20505	2.67855	8.6007	5.59511	2.27287	2.68253	2.9041	1.09007
			5.78469	4.41216	3.0574	4.8274	14.9942	44.2196	2.05311	1.48017			2.00459	4.69783	1.24497	5.01087	1.66005	9.32048	3.9778	2.6995
			3.46401	3.01452	1.0841	5.54336	2.93027	26.6352	1.79058	3.2729			7.21292	8.07358	69.8512	1.51832	2.01517	1.53841	2.2937	2.65635
			49.8993	1.36192	3.11856	5.44886	3.62133	6.7008	1.14604	2.90344			3.45361	22.5018	10.0941	3.39527	2.38728	5.71459	3.56165	1.53651
			17.277	3.50745	10.2892	19.5509	17.0183	68.8044	2.33271	3.25264			4.87901	6.98052	12.4439	2.48229	5.66321	1.31763	2.24818	1.15034
			20.0689	1.46002	80.8454	4.30295	4.0287	35.0726	2.01166	1.03589			5.07589	3.21901	5.54604	13.7868	3.10035	1.24571	1.98402	2.49711
			21.1586	1.41521	33.6791	8.53799	1.8231	7.2354	1.06151	2.02579			8.44144	4.17001	12.2627	1.76503	5.83199	2.91388	2.94718	1.20019
			56.1668	22.4375	43.6276	1.81086	3.5541	3.51888	1.07939	2.35627			27.0841	1.53443	17.4917	17.962	2.72767	2.03881	1.76457	1.47103
			37.2317	8.21513	10.9721	8.46227	16.0187	19.6312	1.71824	1.31649			9.11298	9.45229	13.9987	2.19456	7.05196	5.74426	3.88514	1.41672
			7.65567	6.39903	23.8234	1.88878	4.36213	80.7893	1.88567	3.72576			10.736	2.84792	6.42416	7.5793	2.61213	3.108	4.73939	1.62283
			7.6091	19.2782	26.8015	7.39302	9.47447	31.5814	2.5351	1.54798			4.53895	4.76963	8.18619	4.22036	12.0876	14.3652	5.99352	1.9584
			12.7798	6.97674	44.0161	12.0615	4.37154	11.7299	1.00461	2.11854			5.85696	4.05625	65.2266	1.73221	1.55811	1.37496	3.83881	1.45243
			1.93307	8.67536	15.2783	4.75449	14.8389	52.4306	1.96126	4.06015			7.7606	8.31474	26.5264	8.04048	7.84772	2.34005	3.60473	2.11466
			42.8907	12.2779	18.9574	25.7836	4.7574	29.7256	2.24818	2.11698			2.76418	2.28926	3.5031	2.23031	5.71305	10.1035	2.33352	1.76643
			14.0188	6.4608	5.26929	5.8206	6.47093	48.353	1.69467	2.94008			22.5852	11.4256	20.4864	14.7713	1.78692	23.225	2.33352	1.25302
			4.401	7.67375	6.46564	1.65002	3.19311	8.74765	1.72393	3.01335			1.79195	2.47733	24.0624	4.71084	6.9908	5.19056	2.89841	1.33561
			1.35616	9.18767	49.5529	14.6606	13.1012	11.661	16.2168	2.80601			5.45462	1.13503	6.32812	3.81368	4.41095	12.6503	8.16124	2.22627
			4.73202	22.604	28.1813	11.8086	24.8256	41.3057	8.8643	2.38121			3.76146	2.39897	14.9368	4.58719	1.70933	2.3838	2.27744	2.31854
			2.27011	7.05305	2.61986	1.07769	5.67903	18.9704	4.31592	3.41242			3.39133	8.25963	7.06254	3.83301	2.20717	11.908	1.85723	2.56036
			14.7349	11.2654	17.7167	3.03281	19.3523	76.5257	10.5492	4.10536			2.53866	7.97297	36.284	2.16702	1.12313	6.85419	1.52967	3.37066
			5.68053	13.1923	3.94055	1.69195	17.3947	14.7389	15.634	4.4374			10.766	4.89551	8.17102	1.4732	1.67421	12.2323	4.64673	1.48517
			2.27912	3.14471	2.92231	22.1237	2.86439	29.6769	4.37444	3.41788			3.62113	4.8399	3.85623	2.15296	1.33495	1.0194	3.52508	2.18163
			2.34423	26.3652	7.97115	20.8983	2.15182	124.996	9.60801	5.5146			2.49141	1.33624	3.94073	3.02961	2.10466	2.80575	2.28557	1.50154
			5.94545	22.1038	6.3366	47.4588	5.07671	61.0093	1.76457	4.03988			3.74285	7.77781	9.63986	3.06418	8.76299	1.50974	5.01249	1.35347
			3.05936	10.6701	7.87101	27.1823	9.71916	18.8361	13.0282	5.44912			6.00802	3.48192	12.3537	4.27427	4.64769	9.842	6.8754	1.68458
			57.5169	10.0112	10.7194	6.09722	6.3916	1.31713	31.0186	2.52463			2.79639	2.23971	18.7576	7.34372	2.83189	4.58153	2.60175	2.13847
			76.3258	1.91662	4.69196	7.57827	1.49774	10.1362	1.26226	3.5878			3.87028	4.22663	13.725	4.84972	1.3021	2.91086	4.69631	1.06031
			5.21829	6.81566	1.36101	64.8462	4.48716	52.1726	6.81038	1.61424			5.25272	2.46671	15.9629	1.48843	1.12029	1.93319	3.27636	1.01417
			10.8963	8.18061	2.11914	56.3736	2.50743	21.1243	3.74778	2.16687			9.1187	4.15534	4.43395	4.50632	6.59376	7.31335	2.45057	1.68979
			19.1414	12.0229	19.0259	17.8843	9.13163	74.7021	2.49771	2.88786			2.11698	1.06121	12.402	11.8401	7.01798	1.19743	3.00001	1.26493
			14.179	6.54558	3.3948	17.1968	11.6707	16.0781	15.0415	2.13257			12.5172	2.25892	19.9275	1.89512	5.31205	4.5247	3.54458	2.09606
			74.8074	1.57448	39.6064	14.0275	1.55219	11.8008	11.31	3.34227			5.44602	5.17914	3.28719	5.95433	9.03938	23.2542	4.46304	1.099
			28.7167	6.482	40.1118	28.5798	4.74934	2.28473	16.9329	1.64697			4.80026	2.10472	2.55132	3.78496	2.69256	2.20778	2.99514	1.09156
			128.027	6.30577	3.16628	13.1542	5.33485	2.76954	35.2174	6.67364			6.55857	6.89608	15.0213	1.02315	1.43237	4.28582	2.24655	2.40559
			17.1698	8.33261	7.74129	70.6546	3.19311	29.2841	15.7064	6.26053			3.96908	3.92582	7.23224	1.1884	7.4354	1.36792	4.79303	1.11537
			15.6934	1.4685	20.4057	36.5496	27.6403	4.94463	2.98864	3.4436			4.27764	58.8154	1.4219	5.95725	1.23754	3.32274	3.82906	2.36467
			18.2961	1.12999	11.6939	25.0129	3.3894	14.2872	8.54406	8.72982			13.1221	9.76473	3.56521	4.14652	1.32362	7.98423	1.72312	2.90635
			26.9513	5.98482	13.1094	46.8236	6.39026	15.6391	8.20757	2.62284			4.25545	11.8007	4.40578	3.12102	3.0001	12.0729	5.85779	8.31057
			69.6182	2.24181	41.3337	24.1054	1.1307	22.7829	4.68656	4.84973			1.37242	2.00614	8.83828	3.04367	3.38977	2.23796	1.06476	1.31627
			35.885	4.72464	27.766	11.9904	1.51589	9.76957	7.83694	2.09516			1.03952	8.74195	16.784	20.0581	2.45751	6.27433	2.1539	1.413
			53.464	37.3326	3.0742	20.2978	10.5474	2.83864	3.93879	3.55896			7.96893	12.2016	3.09221	27.3157	2.32498	9.54427	1.68492	3.60727
			1.9536	4.01794	30.0256	25.2253	6.73108	10.9189	1.32485	2.18324			2.00315	3.9248	13.4802	20.7584	2.32838	26.685	1.65809	2.16898
			10.9494	3.39723	41.0951	31.9825	2.32728	9.23079	7.9556	1.33364			2.25157	2.28218	3.58326	3.00031	24.0744	14.0856	1.42807	4.09539
			109.868	19.039	10.4694	9.39351	4.80647	12.332	1.96777	1.27518			6.06028	4.66244	1.53238	20.6945	8.33538	3.13666	3.03252	3.72781
			17.1187	2.34779	10.4344	5.80371	4.37759	1.70784	34.5079	3.20431			2.29239	2.67198	2.4105	9.17849	3.04881	2.23444	3.07479	7.79864
			2.67826	3.1429	57.4494	2.00957	1.42178	16.6899	1.95801	2.66493			10.1231	8.16812	2.75063	12.4484	5.54314	29.2524	1.59307	6.1282
			9.89223	2.89582	29.8394	23.2999	2.24392	12.7819	5.9667	1.06161			8.46363	7.99218	4.15014	4.9511	3.82418	2.7464	1.68979	2.43238
			4.09601	6.09019	17.0956	20.9853	10.4183	6.4005	2.38554	5.0516			1.97881	13.8296	8.17896	8.76888	32.9371	4.0409	1.79464	1.68012
			4.96089	7.28922	3.83704	7.97881	14.6971	24.9951	5.98784	1.72648			2.91596	11.9852	2.56793	21.8706	2.10862	5.67738	8.89113	3.41977
			8.43441	4.54842	5.34928	17.8649	17.0163	1.87253	3.04065	1.28453			3.99198	9.789	1.86818	23.7124	3.36258	11.486	1.40125	2.09531
			84.599	6.19375	25.4606	12.7048	29.2671	16.8623	4.10053	13.4361			2.51718	11.8528	1.60532	12.2415	2.50565	5.17799	1.16961	2.5745
			11.3245	13.4448	53.9034	2.63697	18.9046	6.80628	2.88704	4.83024			2.92383	3.28474	5.67098	10.0839	4.00089	1.68928	2.39123	1.39663
			38.8422	9.99126	60.7024	5.69638	5.71601	4.28331	2.8846	6.3642			10.3601	2.14668	9.27445	9.55939	10.7079	4.06504	1.28665	2.23594
			4.31136	9.83381	39.023	1.35025	8.51653	3.17817	2.63263	7.71966			6.0474	9.53672	1.9079	1.59274	4.0513	2.58497	1.43783	1.54321
			3.65932	2.69114	21.1202	2.0612	6.22018	2.40481	5.6871	3.679			8.55599	21.3313	15.6632	5.78439	6.55752	1.82658	2.64239	2.52613
			2.10635	4.77793	38.2152	1.25136	19.9586	2.52118	22.6988	5.76636			2.49428	5.19987	21.1392	5.78556	7.36121	1.35585	1.69792	4.2323
			1.86196	9.99792	2.71933	10.3335	3.14807	2.86549	8.99191	3.06713			4.88832	2.65327	1.32657	3.48669	2.07917	1.59574	6.48445	3.95401
			13.6522	1.91359	13.8359	2.26647	5.34359	3.30289	4.48011	2.64779			11.8206	1.76598	3.40706	3.66073	2.03046	6.59469	2.87322	2.79846
			38.994	25.1668	1.40873	30.9267	10.7168	1.83733	4.50855	2.76314			4.65206	3.44501	6.77224	11.1773	1.99988	7.85348	1.25251	2.41973
			70.3313	28.7911	5.62215	6.09691	13.323	1.0765	12.074	1.06005			1.07532	16.2832	2.78963	5.90803	10.3517	8.10343	1.17936	2.03579
			32.72	1.26321	11.0265	7.28131	4.53691	3.21517	5.57087	2.26118			4.77091	19.7479	4.37473	6.8134	7.84206	6.32764	4.12817	3.44879
			82.5663	7.61562	23.4544	7.41555	4.61018	13.4849	29.7904	1.2136			6.06244	25.9078	13.8088	3.80547	6.9166	8.27744	1.29396	3.67201
			38.3059	4.50966	4.46613	27.9512	7.93909	3.88828	1.45977	1.00237			5.82331	1.58751	2.21264	3.84884	2.71408	12.2736	1.86861	5.43546
			33.7081	1.80217	17.7052	7.94126	19.2118	5.74589	1.23138	6.70559			2.65107	6.74441	1.52155	23.3339	10.5261	8.74967	2.02629	2.4547
			32.2753	5.58212	1.29515	26.1657	20.6981	25.0494	1.48009	3.80761			1.28365	4.49914	1.36196	27.6269	11.7489	10.5078	1.6841	5.77104
			23.0977	9.26761	2.58289	58.9899	6.85477	34.186	9.13903	1.37339			4.84537	5.59927	6.95422	29.6621	2.42466	5.48828	1.576	1.27906
			49.7906	5.60998	8.64797	17.5372	1.10112	7.46447	29.9522	2.03124			4.84966	4.81209	1.73386	22.8024	1.78579	3.84275	1.7727	1.52535
			10.3069	10.4909	4.39086	13.4718	18.678	11.817	16.8557	2.68832			2.09193	18.3601	1.33813	13.284	7.05083	13.8321	3.32675	1.81331
			21.0404	17.031	10.7261	15.4256	2.93094	32.1374	2.32621	2.84265			4.30054	3.90509	1.18792	8.64933	2.21227	18.4262	1.39313	2.74489
			15.6995	9.1253	8.38651	55.6586	4.89857	28.1483	2.95612	2.47319			8.43285	29.0996	1.40601	32.084	1.8345	3.31218	3.74697	1.86093
			45.4367	17.8612	4.5945	17.6827	15.052	9.03983	26.1264	1.1949			1.47265	14.2937	1.0861	14.1929	3.43055	17.5692	1.08751	2.08415
			36.4605	18.2791	22.7601	2.00832	6.59731	6.2543	8.49448	1.08265			12.3532	2.41869	45.6147	3.99123	3.74942	17.1805	2.53753	1.23963
			36.7955	14.269	26.2295	12.6654	15.9669	28.2431	5.88298	3.55974			3.23955	15.8029	2.16931	20.1384	3.20116	10.5084	1.02899	3.52691
			12.9366	1.00645	61.2966	15.6926	8.1663	5.95415	16.1298	1.62905			6.26861	11.2698	5.25574	1.67244	4.19459	7.95104	2.15471	4.77696
			1.44429	8.12006	35.8816	8.56428	11.3184	22.9663	5.64646	2.02267			3.41567	1.47629	2.39534	5.10932	1.44653	1.27036	2.73342	2.16972
			23.5084	7.51691	1.51627	20.7634	7.10215	23.3356	2.00678	2.0632			14.2762	6.32175	34.7278	3.40172	2.0197	3.26843	1.92388	1.59753
			49.9058	11.57	23.316	45.0381	9.67816	23.0952	3.64374	1.26816			16.54	6.72672	2.2668	3.37242	1.41708	1.7788	1.58169	3.87812
			9.68439	6.24461	10.1992	14.4008	3.74435	15.8395	7.30862	1.4373			10.8806	14.7735	4.49316	1.28451	1.28624	2.89677	1.19805	4.84318
			13.1679	4.81911	17.1353	28.117	8.10916	1.55806	13.4249	1.43652			21.6409	8.41939	5.15103	2.11369	1.31513	32.8186	1.85235	2.35723
			2.58861	2.81225	8.32132	23.2924	7.24265	1.75796	13.65	1.63216			3.40994	3.36917	30.7509	2.29594	1.03817	4.30091	1.26226	2.56855
			38.0815	5.25269	8.54513	22.8747	3.27849	21.046	4.64998	5.27453			2.30885	2.34487	8.99788	6.20806	1.21658	5.39826	1.38256	1.15852
			9.11299	5.65176	16.4471	12.4357	4.40918	1.54433	2.70172	2.7647			5.54768	6.87839	12.6353	4.3692	8.39824	2.19622	1.0802	1.30585
			22.0781	4.89722	13.9435	41.0118	1.86612	18.5887	2.34328	1.86522			22.4456	9.39314	11.2907	10.9535	2.5538	3.70445	1.54837	2.32672
			3.22613	7.23835	19.5871	2.197	3.82367	25.8365	1.6077	2.58465			13.929	8.15396	12.9256	17.9562	1.59718	1.82004	1.0737	1.7575
			10.2668	6.64005	37.3865	22.0257	8.30277	3.70329	15.5089	8.87324			16.0503	5.73073	7.79406	6.66573	1.233	2.28272	2.17015	1.59009
			17.4587	6.69273	21.4119	5.54492	31.1177	4.72609	19.3924	4.0999			12.4635	8.07256	14.6847	6.81281	1.32306	1.63094	1.54187	1.68756
			13.6647	4.1766	12.5415	5.37031	7.69103	4.25706	5.20918	2.33912			32.5623	2.79837	6.357	10.7126	13.3937	4.43468	1.35736	3.48599
			12.0246	1.48727	5.47832	2.05775	1.75655	5.46066	7.02577	6.52866			20.9916	4.21096	33.3997	2.71493	3.55062	1.3468	2.56761	1.08561
			10.7841	14.7547	1.85165	24.4671	9.86302	8.82083	2.08156	3.61274			4.21965	4.74485	2.13681	1.37006	1.6963	9.57344	1.0737	1.62208
			5.18625	8.49066	12.5334	1.22789	5.28242	2.7539	11.8521	4.40388			5.73597	8.157	3.22436	1.41284	23.2526	2.06697	1.78814	1.02533
			10.0284	14.1352	16.8597	12.4235	10.7248	3.44193	6.70147	3.3033			8.78796	1.4687	24.8409	1.95665	2.04179	10.9665	1.80765	2.43759
			4.49114	9.16769	4.27122	1.96075	5.42627	1.26864	3.27961	2.91046			1.26861	3.74937	11.8359	1.22942	2.76505	14.5261	2.1222	3.39298
			8.79748	9.71633	8.70577	7.08261	11.9732	1.85881	3.32594	2.94086			7.16567	2.23364	39.062	16.1349	1.11463	2.12078	1.01111	5.12221
			23.6816	3.91923	13.6404	8.82713	2.86641	4.6145	3.17233	2.67974			8.54238	4.78075	6.03637	2.87901	1.74501	2.3496	1.93363	1.1295
			13.0422	4.30437	9.92361	14.082	7.76632	4.90689	8.68793	1.81611			14.6413	5.55933	4.23319	10.7525	22.8618	1.2598	2.26931	3.23939
			1.5109	12.7635	14.7823	12.3459	5.4935	3.501	3.12843	1.84184			5.97795	4.97742	8.71985	2.20687	6.09705	3.18947	1.78733	1.65477
			8.7449	2.86131	14.4455	4.36678	2.857	3.38941	1.4045	6.59881			20.9006	7.34403	2.54699	2.52096	5.91921	2.91388	1.34111	1.68361
			5.74764	4.65924	6.47102	5.54148	3.81291	5.39203	1.88324	2.69455			11.7504	1.42017	1.61398	9.22889	7.55377	1.37345	9.99164	2.15595
			1.2595	2.6978	6.17395	7.70031	2.01536	2.60651	2.12708	3.28927			3.18299	7.00125	13.3842	49.5139	2.67273	1.4157	1.76132	2.55191
			2.84502	5.44647	66.9671	5.84251	9.7474	5.06682	2.25468	2.37342			4.35209	11.0686	9.6803	21.7991	5.19878	3.2468	1.20293	1.9268
			3.44097	3.05085	16.4417	3.23809	11.5799	4.94389	5.41157	2.18791			10.2821	1.16131	11.2835	2.26547	10.0022	1.54143	1.6012	2.96502
			1.15684	5.00805	43.0301	20.739	3.89156	2.47344	2.3449	2.43967			4.40722	1.50308	9.88683	11.3578	4.1742	7.07397	3.74534	3.97908
			2.56307	66.9025	18.4519	1.13809	33.6319	2.09213	3.28449	1.26816			4.22681	1.1148	11.6034	6.46063	9.91104	3.11655	2.11976	1.26582
			19.0077	5.38289	17.8047	7.70688	11.1793	1.9155	2.44244	2.22221			7.43486	5.45165	2.19892	17.9731	2.43146	1.49013	1.90925	2.08736
			97.0858	1.5884	5.56301	54.0151	4.29558	5.2166	2.72448	2.72261			4.31057	6.97597	3.1962	16.9775	1.47088	1.47001	1.61177	3.59871
			13.7724	10.4315	1.79721	17.2706	8.54006	31.8569	3.87945	2.55425			9.30628	10.7132	33.7442	4.58368	6.19787	1.99857	1.57031	3.62677
			22.2158	1.64835	20.9475	9.57814	4.14432	12.9758	2.28313	1.29622			9.09365	1.86103	11.3968	7.43338	3.38184	2.59	1.5565	3.31577
			18.0402	1.97294	33.4002	2.24206	1.0023	13.7516	3.81037	1.44899			3.03623	2.38582	23.7599	11.8125	3.6486	13.8065	1.52561	2.89955
			74.4594	4.82819	39.6877	22.3211	4.59069	47.1606	2.92849	2.30639			5.10882	3.79436	29.2099	11.4152	1.31003	9.37328	1.18424	1.90185
			21.0515	3.83324	19.0199	40.5787	4.24785	24.4879	7.27123	1.98448			2.93027	11.6874	18.6709	2.37095	7.85622	1.22208	2.71797	1.96577
			63.9967	3.48686	45.6016	41.1664	13.8104	8.57379	2.74642	2.0858			18.3154	1.36658	3.51971	19.2424	2.23379	21.6574	1.61746	4.20356
			13.7624	9.89074	3.54602	14.2225	1.49841	13.9801	17.5579	13.9623			11.1168	4.50672	3.62371	18.6611	4.05696	8.19546	3.08942	3.82787
			50.1082	1.49212	43.9045	41.4036	3.66435	32.3391	3.51288	3.21289			7.37687	7.73635	20.7103	1.1134	2.76279	10.4012	1.15579	2.90656
			8.73188	2.0444	14.0181	37.5659	4.59607	9.42472	2.32458	10.5592			6.99313	1.60774	10.6176	12.8855	2.70898	25.5364	2.56761	2.693
			63.9712	1.95598	48.1489	22.4125	5.37115	25.309	1.59714	9.85846			23.1486	2.36257	8.68735	10.9494	11.4312	6.07317	1.0355	3.83099
			15.8878	3.50926	26.8062	9.94081	15.6187	11.1612	1.91331	4.72112			2.09193	2.82972	9.80379	3.59334	6.49578	2.91689	1.65891	4.98068
			19.5706	2.07225	17.2818	8.8991	17.0647	8.01048	4.49799	3.00321			8.71922	1.11076	3.55438	12.5456	2.52321	7.69406	2.26444	2.34848
			15.708	34.4598	23.7448	71.2106	12.2945	56.2052	2.39286	5.7913			1.24213	8.98715	1.19442	4.20629	21.2862	6.88336	1.12978	7.18028
			24.7388	10.4382	24.7045	1.48136	3.39949	15.4564	1.85479	3.7928			3.4801	19.1103	28.9405	12.8791	2.07974	1.64955	2.53266	2.07567
			16.9069	9.92768	7.81791	3.14859	12.3785	4.60197	2.25875	1.06784			4.57904	5.06539	2.89795	3.39235	1.69687	2.18918	2.97238	1.71478
			28.4447	13.6459	26.8916	11.8815	8.22815	15.3329	1.16636	3.34383			8.31043	8.08066	3.20559	9.08004	2.92081	5.03818	2.02141	2.94787
			28.0992	17.4125	61.3584	18.4253	20.1153	6.58429	2.48145	8.08911			9.32417	3.56887	4.03821	23.907	2.04292	17.7548	1.64184	3.12949
			11.3706	8.95998	51.0456	3.89866	9.70908	15.0143	1.27771	6.04618			13.6992	3.02083	10.9534	16.7033	2.06898	1.81451	3.33813	1.74674
			41.8906	6.84049	7.9772	10.8933	31.4411	16.1015	1.12815	2.60492			7.67756	3.95919	10.6328	10.7003	4.09207	2.30585	2.33271	4.21682
			13.4374	12.2331	21.4206	29.436	26.6864	13.683	1.69792	2.06788			4.30413	20.0765	17.2808	19.3221	13.3586	1.87586	1.576	3.42178
			8.00873	3.08234	4.85864	10.8164	8.67451	10.2112	1.04037	1.77247			6.45189	7.79854	14.8205	17.4416	1.64816	1.65609	1.06801	3.45529
			28.5339	18.6987	1.83081	46.5833	1.30212	40.3615	1.37931	1.14969			6.12686	13.0141	27.4695	3.3818	3.64804	1.47957	3.07154	1.93147
			9.28676	9.8538	13.4932	17.955	17.7914	16.5682	1.38743	2.10919			3.06414	5.38339	14.3504	9.08297	6.27716	18.9804	1.81903	3.30564
			6.59949	11.1824	14.9133	12.0565	3.7551	4.01956	1.91412	4.67825			12.6167	3.96879	7.92477	12.061	1.14522	1.0018	2.01979	2.86525
			6.34859	2.95517	7.66669	7.66182	7.25744	16.4178	2.43106	4.44753			1.84422	5.51383	1.12871	24.0699	1.9506	28.3215	1.17205	3.05154
			8.05731	9.08291	54.1575	25.1856	8.24092	12.5343	6.89166	3.33292			7.32102	3.00414	4.67947	1.68357	3.09129	1.39156	2.15715	2.51294
			33.637	8.67899	46.8154	62.8485	17.2435	26.2423	4.17287	1.90341			10.9672	6.50426	4.75097	12.1636	1.09821	3.7135	2.51071	5.70088
			6.603	5.51854	13.5973	36.3433	2.6002	6.49479	12.2553	1.91666			10.6014	9.68334	16.9299	2.85733	2.0214	1.1567	1.87023	2.41551
			1.8845	4.38068	13.266	13.2581	9.07113	14.5816	13.0859	1.34143			6.37601	26.014	1.93173	8.82396	4.82667	2.65789	2.33434	1.86678
			13.5385	9.09078	11.6704	19.876	1.33775	1.33906	1.73856	6.81394			4.67784	10.1247	33.1065	4.96633	4.00825	1.16625	1.87592	1.86132
			8.98729	2.21335	1.95179	3.5945	3.40419	5.35802	1.741	2.79744			1.75472	7.66861	9.67163	19.444	3.09355	1.94074	2.42618	1.84495
			12.29	1.94751	4.43118	8.84622	3.12992	4.09117	16.5891	2.87616			3.18084	7.85011	2.5571	4.01233	1.86791	1.295	3.63562	1.87302
			14.5571	3.97313	16.5136	2.1122	4.03206	2.773	2.90248	3.63223			7.8909	9.7071	5.29979	3.87403	1.98402	6.17325	13.4541	2.13023
			14.7199	1.02947	1.27834	3.96687	1.41909	52.5079	8.87324	2.9619			4.7301	4.18973	3.67642	14.6277	6.13047	1.17983	1.12491	1.6384
			2.47844	2.35808	12.7424	32.7495	5.91096	1.62071	9.34466	3.0796			5.61927	5.85156	2.50222	3.21009	1.28284	1.49868	3.70552	1.90107
			20.3113	8.5276	2.30397	7.09418	9.92957	2.14822	13.5305	1.14969			16.2758	11.3861	8.94155	18.7801	1.72122	1.20297	3.62993	1.52694
			16.0986	7.87904	14.4677	2.68078	3.94736	3.61199	10.7589	1.51915			14.5776	15.5127	12.5306	5.12983	3.16265	4.38137	1.27283	1.01094
			6.33607	12.4462	32.6858	1.35463	13.3264	1.33428	8.6099	1.29934			1.30441	8.10897	7.2243	1.37475	2.13638	1.27539	2.28394	1.19567
			5.55433	11.8794	20.6665	2.11627	4.66463	1.86119	3.39584	2.2643			6.52134	5.37884	2.56865	6.04691	5.11439	2.28926	2.17015	1.44977
			8.36129	17.4173	27.6954	5.60594	8.71014	1.37546	15.1708	1.17775			5.47036	12.2876	10.5974	19.9099	8.50246	2.35916	1.86536	1.4755
			7.06774	6.16226	21.1363	13.8914	18.4555	1.52285	2.65783	1.66023			2.17784	9.72429	4.37762	6.17935	2.16243	1.13004	5.28071	1.77402
			6.28649	23.8896	4.47084	12.3791	10.8653	9.35132	5.00761	1.33208			8.69416	13.7912	1.0175	7.48437	3.51097	1.66766	2.95125	1.44977
			49.2658	16.1014	63.4937	21.265	4.87101	12.6721	1.9637	6.66273			4.97351	20.0224	1.07238	8.59835	1.41368	1.65106	5.48065	1.20113
			11.642	6.7327	19.0783	1.47666	3.33428	22.1016	12.6178	6.98542			15.5162	4.01631	18.3279	5.75098	9.23988	1.31361	4.31755	1.56435
			1.1939	23.6698	33.8129	1.32458	1.1549	2.5534	8.43596	5.83963			3.01761	14.1056	2.83585	4.54793	1.27548	1.64754	3.59986	1.50278
			7.0482	18.029	12.2148	28.0488	4.87773	1.63265	4.93202	2.75145			1.48483	15.6719	1.11137	6.09028	1.53149	1.5188	1.59307	3.46309
			1.883	28.7293	2.08688	27.361	18.8266	1.73946	10.0932	4.3883			3.1429	3.01577	1.94039	43.6938	2.02933	1.20146	6.56248	2.94943
			108.581	7.91113	7.04903	10.7006	11.1974	1.89401	12.9697	1.67659			17.286	5.02494	4.29457	4.29947	15.9707	2.38632	3.04065	1.15904
			131.065	11.0007	20.5744	59.9521	4.64783	21.1576	11.6847	3.87698			2.48854	12.2411	2.56143	5.49666	2.55266	1.38703	15.274	1.26816
			1.37719	5.06557	17.5076	7.3054	4.67539	1.61117	17.844	2.41006			2.46349	4.52341	3.37601	43.7594	3.56988	1.93873	4.75808	1.41392
			46.3327	1.96386	18.0023	16.7668	16.8926	1.77646	3.68032	4.20357			8.37772	6.59779	1.15687	1.64021	2.09163	5.96655	3.08454	4.73359
			26.6944	3.87624	28.9032	16.5706	6.39026	1.03055	4.43296	2.31652			2.49428	10.9948	6.05371	1.71229	10.4412	4.75353	1.94907	4.73125
			1.89101	1.82821	9.46121	31.4349	16.2701	8.75639	16.6939	8.3401			6.82561	1.59055	2.89651	8.22917	1.1826	9.89027	3.62993	3.34072
			33.361	6.9828	5.11337	26.8919	4.37894	1.92266	6.87784	5.50291			8.93114	4.18063	2.24225	1.1257	1.48844	4.21139	1.04444	4.30879
			21.7035	26.1084	26.6664	10.658	31.2428	1.70246	2.6814	1.5246			2.52792	8.77077	2.39101	9.44629	37.4608	5.77746	2.21973	4.73515
			1.84093	3.02905	45.3811	12.4085	12.6743	27.8027	7.16069	4.28307			1.47695	6.41376	12.8339	2.06799	3.1921	1.28494	2.7643	2.53087
			8.54759	1.44125	1.40201	40.4579	1.13339	1.7681	10.2826	2.73664			5.46965	14.9894	3.12615	8.6423	4.71622	2.04937	1.17692	3.55896
			6.08167	13.1451	3.10848	33.5768	12.6609	12.2335	10.1607	2.69455			8.05556	1.93738	16.1579	1.93204	2.21623	19.1288	5.41482	4.47092
			17.4147	10.1087	28.0866	79.2264	8.54746	60.1967	8.78546	2.22766			3.16438	5.02342	2.96872	14.8662	4.69697	14.422	1.92632	5.90978
			37.4991	4.26198	33.413	31.1304	4.00853	2.44599	5.96101	3.26667			2.12987	1.85648	1.00233	1.11926	1.28284	2.13386	1.69061	2.28534
			9.26573	21.7496	1.80124	18.1368	12.0404	6.33367	9.09107	3.08506			6.80126	7.39003	1.4154	15.3573	1.84469	8.57315	17.5148	4.85363
			28.3651	11.8588	8.6157	22.4698	2.64927	22.3433	2.45788	7.94726			7.96392	5.41626	3.88151	1.12746	3.57611	1.51829	1.66622	1.44042
			8.88212	7.16932	47.6253	51.4808	5.87869	1.93161	3.11218	1.99851			12.6733	4.46223	2.41267	2.78877	3.3201	4.79829	1.87592	3.69848
			5.28941	13.1874	3.6959	16.6032	2.97733	8.00152	9.25038	1.64152			7.49069	4.84344	2.63437	1.40757	6.48899	10.8644	1.48985	5.91835
			7.16038	7.55203	6.26737	10.5732	3.74098	15.2583	1.95232	3.09207			2.96606	3.04156	34.2049	4.84034	7.09784	1.3297	7.73859	1.38274
			11.2429	5.80315	6.76876	12.4708	4.80312	12.7145	4.28422	1.99149			2.6124	5.30301	19.7614	8.40497	8.8791	26.1771	1.18911	2.12711
			9.45954	31.521	15.2924	35.7935	3.63208	6.82657	15.9071	3.77721			2.01676	3.71297	18.5229	2.50104	3.06467	2.06798	3.1138	9.29025
			33.3485	8.22663	60.3166	8.39749	6.53882	17.9573	23.4531	1.04758			1.3982	2.55367	2.49211	10.3317	4.90596	10.3454	1.99865	1.69062
			2.33321	27.9584	62.1784	9.39226	4.81723	19.3883	7.60285	1.3539			5	2.93185	1.62843	1.06828	7.71689	1.72549	1.35411	2.32432
			6.9846	45.2734	16.363	13.192	2.06309	5.64087	18.4764	1.57527			1.06601	5.00016	26.7113	1.03663	1.46012	4.01877	1.92469	1.44276
			10.8518	7.51751	13.799	19.4611	14.2951	13.3023	8.11735	1.44276			2.10624	4.25646	2.86112	2.08908	15.6348	1.87536	1.09808	2.23312
			16.8944	7.62652	30.2413	34.2859	5.24544	12.0629	12.9161	9.40171			12.8959	4.52947	18.7598	2.58308	15.2769	1.28947	4.29398	5.6736
			5.95397	11.5694	25.6777	61.6119	3.67914	6.9656	7.61911	4.02429			9.36784	4.01834	3.20703	2.54675	1.93248	2.30133	2.83664	1.40223
			2.18347	11.7026	23.4262	16.6482	14.5734	12.0682	12.8185	3.04375			2.39405	5.67714	4.56465	1.15969	1.41764	42.0651	4.32405	3.70784
			1.4503	9.14165	37.494	5.7261	12.2132	22.5569	10.3094	15.755			4.16596	3.68769	3.28213	1.66365	3.62821	7.84443	2.38879	2.83096
			1.27452	25.0063	50.6081	27.1745	21.0282	6.3641	2.80088	8.96521			7.08119	2.15174	36.2847	1.36362	2.03443	2.7635	3.06747	1.80364
			3.98349	1.28441	21.3158	24.734	14.3764	3.83577	11.909	2.18401			4.16166	3.53298	11.8373	2.61004	2.53567	19.078	2.66189	2.20428
			9.22944	7.01429	18.8539	17.9788	9.06037	5.37712	12.035	1.56825			2.70905	3.13812	2.88712	33.1382	1.07385	2.63224	2.66352	3.23393
			8.44213	10.0494	31.9944	9.54903	12.1358	1.6959	6.37391	3.0266			5.24628	2.85348	2.70442	15.7809	1.84809	8.67976	2.02548	3.06401
			8.91507	7.81061	13.9797	9.56437	14.4268	4.69148	9.69254	2.8255			2.34107	11.5661	14.7483	5.54589	5.38285	4.53677	3.49094	1.25101
			2.89121	1.29228	2.3261	1.01511	9.00391	3.34645	4.13142	3.06089			4.84679	4.51784	11.5954	6.98041	1.82317	1.54796	1.33135	3.49349
			7.02996	2.27936	7.8818	21.3104	3.59309	3.20622	10.4996	1.81533			6.87643	1.9926	15.8835	7.84241	2.69766	4.84405	3.49825	1.37806
			18.2677	2.14129	9.94476	1.25981	13.7062	24.7988	5.4587	4.28697			4.1459	1.49649	14.9274	15.5026	1.73651	9.64385	2.94799	2.03904
			4.85975	12.4329	34.2773	24.9553	2.45971	11.6416	5.92688	1.90341			1.39247	2.88782	24.7745	17.962	1.81977	23.3341	2.40017	1.4638
			3.65476	12.1731	7.51741	8.19128	10.7584	4.14189	3.97699	2.17544			2.5222	2.06348	5.37562	4.25083	1.28568	3.69037	6.49339	1.76077
			3.731	35.1665	7.43518	29.0098	6.75192	2.03902	5.66922	1.41236			4.05069	1.98331	9.39144	11.744	2.48187	2.81078	1.98077	2.98763
			25.3264	5.31749	40.975	25.7429	15.7357	3.28916	4.3842	1.63528			10.6894	10.1263	25.7443	27.0274	1.92908	7.11118	2.75374	2.28768
			2.07959	6.32334	5.09984	1.23978	9.26877	8.2975	3.91522	1.1302			1.00945	4.29949	1.34896	13.3145	2.73957	7.53715	3.06829	1.37027
			7.17637	16.0609	7.72196	43.2783	3.88887	3.54516	9.26338	4.05469			11.0639	9.56275	20.8482	1.44214	2.49093	2.33703	5.42213	2.89175
			21.5125	7.76761	6.06296	42.6371	7.79926	1.93817	1.64672	3.91829			7.15421	11.9969	21.8505	8.30066	1.02231	1.41469	3.02765	2.22533
			7.4283	20.6474	21.0736	11.1258	4.37557	4.44622	6.41049	3.88395			1.07532	16.8529	7.1983	30.0371	1.54338	1.4675	1.05256	1.25959
			44.214	17.1551	10.0229	26.7952	4.62632	5.95355	5.40831	7.72931			1.03236	2.65719	2.7528	7.14625	1.99875	2.33955	5.78057	1.61969
			3.5752	1.84214	2.4001	29.8756	17.7698	52.916	11.0889	3.76509			5.64576	7.40632	28.2097	11.0853	2.51245	8.56108	3.26823	1.23776
			17.5003	7.07303	8.07966	33.2461	7.30181	10.4392	9.61613	2.78406			12.2795	7.52541	29.2965	21.1311	2.44505	2.37475	1.99703	1.83014
			27.1557	12.2125	3.50045	11.3458	2.88523	3.56843	1.99784	7.53557			3.88173	3.96023	1.63709	36.8792	11.758	2.15548	1.66216	1.76233
			6.57967	4.23231	5.32083	5.66978	1.74646	1.20002	1.84341	1.76368			11.9638	2.27552	7.6583	11.267	14.1481	12.6754	1.81578	1.30324
			1.0956	21.8313	12.6738	7.7607	7.13241	4.28212	9.48853	2.26847			11.4605	7.08855	20.9457	11.7739	1.01268	2.68153	1.16717	2.00006
			1.60334	2.81589	4.82693	5.05927	4.31171	1.88864	1.70036	4.3733			7.01675	4.60448	71.1886	4.92356	2.83982	11.3794	1.87511	1.75688
			6.33546	17.6541	3.41719	41.3216	18.1416	1.84628	3.95179	1.40631			6.08319	7.92568	24.6005	15.6971	8.54041	7.76547	1.61014	3.08506
			1.43759	35.9828	9.81576	19.2088	12.8316	1.22807	2.6944	5.17371			14.8389	2.92325	43.982	43.3404	1.20695	4.23854	1.88811	2.67663
			3.26911	2.81347	18.8755	31.8295	30.1625	15.2595	1.03793	1.46497			11.3918	3.23754	8.46999	10.3194	1.05346	19.8847	1.76863	1.4069
			1.86246	1.23354	5.40615	10.0362	18.3668	1.24537	1.61176	1.10838			3.22452	10.5381	2.43578	3.05598	2.92081	2.7977	2.69522	2.19415
			21.0843	1.4352	4.01542	37.7349	4.14769	3.13521	1.31103	7.12417			8.57819	8.70471	10.3035	3.10051	3.03578	2.31742	1.98565	5.21685
			4.61113	1.70225	3.85558	7.14362	13.1886	11.1111	1.8239	2.78792			10.0251	4.70266	1.53311	12.9523	1.35194	3.82465	1.0802	1.29233
			4.14206	38.7248	2.91507	13.5644	8.53065	1.76572	3.82093	3.14838			20.7267	6.63019	2.36068	15.2301	1.78126	5.64016	2.1669	2.57296
			6.20011	2.99332	12.4168	8.1869	5.59568	20.0966	1.28584	2.77866			3.6913	7.96227	7.45899	19.655	1.70536	1.29953	2.23599	2.68286
			6.94929	9.16648	9.37634	4.33487	17.3087	5.54957	5.85047	7.67991			17.3776	5.07678	11.8077	8.65285	1.35251	1.57965	1.97102	2.89253
			1.0967	10.7936	22.617	15.7339	13.4958	9.1741	2.47089	2.61657			5.8498	48.6172	10.4869	29.6064	1.79995	1.61083	1.18749	2.64389
			2.16744	8.8752	4.13722	21.5892	7.46919	8.5344	2.35222	10.1027			23.4042	6.33566	3.47061	3.51482	3.53759	4.6107	1.83447	5.46627
			4.54207	18.0144	9.59373	18.4434	7.285	3.61796	1.7345	3.46252			11.2149	4.79619	10.6848	13.0285	2.86587	4.06755	1.57112	2.60102
			1.01825	1.44246	18.784	1.71229	5.70323	10.549	2.09781	10.2471			14.2841	1.14734	2.00755	9.07125	1.63003	1.57562	3.25442	2.26118
			12.6842	10.6229	8.65168	9.92923	14.9243	11.8994	1.2712	1.70116			2.67826	2.5991	3.27346	22.8358	3.77207	3.83571	3.19102	3.04297
			1.95915	3.16106	9.37479	8.26638	1.72025	6.39871	2.03442	2.41898			6.80628	23.7213	2.50655	15.2102	3.5223	3.39768	3.29993	1.20736
			28.0911	23.542	7.2738	2.89231	5.98154	15.7924	3.14306	5.38674			6.56286	13.1105	5.71646	16.003	1.08801	2.53367	2.27663	1.21984
			27.8077	39.3431	16.5242	16.0402	17.8848	11.1642	10.4509	1.14928			4.86255	12.2048	21.1161	13.332	5.48197	3.10548	2.58386	3.80683
			8.27141	1.69438	1.15483	3.67518	1.72025	1.03294	7.94341	1.90956			18.3541	11.4275	11.981	9.50665	3.51211	7.48283	1.36224	2.49813
			2.96414	4.06578	13.1733	6.57511	6.49916	20.275	7.06803	1.04354			9.99643	3.99857	7.89661	12.3599	5.8688	3.68685	2.49121	2.44825
			1.54367	5.68083	35.6942	18.8834	1.78882	1.75378	12.6682	1.3901			5.36513	14.5257	1.66887	9.77679	2.56116	2.69611	2.02304	1.6041
			1.28787	17.1509	6.47874	9.25711	1.5058	11.6887	17.2621	1.89798			2.16424	8.20627	1.55188	6.8591	5.0974	1.46901	2.72854	4.13264
			4.49179	1.59083	38.5831	11.8724	3.28386	24.1872	3.90465	2.79873			7.84651	1.42387	15.4163	12.6728	3.36938	3.05217	2.21161	1.63216
			3.08624	4.97111	11.6125	8.56792	3.36588	1.29788	7.23872	1.16395			8.69345	23.7857	13.1213	17.9397	1.6946	2.71824	5.60663	10.475
			2.64093	4.09364	16.5037	11.5032	2.18947	31.4183	4.16474	2.15732			5.87772	9.05791	2.25525	3.21772	8.63952	2.9707	4.45654	2.1505
			1.54975	1.64169	1.32134	14.2126	2.51886	9.2827	7.44517	3.20241			9.14806	1.3588	2.17798	5.63613	2.64045	8.59176	1.73043	3.73434
			1.78898	6.5583	13.8502	9.84015	2.45903	3.35003	8.33355	3.02488			23.4601	5.08491	25.3428	5.85529	3.37108	5.09148	2.18641	2.32198
			19.2103	1.23717	17.0572	12.001	2.63516	9.33223	12.1837	10.2479			6.1956	8.11739	6.84806	2.25492	5.95716	5.73672	2.18722	2.43578
			9.19905	6.18708	5.52898	14.7297	2.8933	11.1743	17.9676	15.4347			17.6282	4.90947	5.39511	8.20866	4.98752	1.04706	1.08508	2.98529
			7.43935	23.8721	5.67647	44.7511	1.1186	19.8388	7.83368	1.26661			8.40493	9.06431	10.2638	3.49665	4.55821	1.49415	1.19643	3.27602
			56.2242	7.62773	22.5101	7.63665	7.49474	3.87157	17.6888	5.12045			10.4646	5.86395	14.0153	5.42576	5.80593	7.08855	2.41074	2.59634
			65.8564	12.2331	9.46114	5.63823	5.90692	6.36768	7.43623	13.6741			19.2633	6.31881	2.74919	3.9508	2.22983	1.77629	1.25414	1.4677
			11.5825	3.98766	15.1392	9.81925	1.81369	2.26816	11.9692	10.2008			10.9858	7.27445	2.80407	18.1812	11.963	14.7695	1.8109	7.04232
			27.0878	12.6612	8.26263	49.4734	10.6731	11.4631	1.47196	6.07446			2.40621	2.05883	5.52871	13.754	2.58608	1.02192	1.45977	3.24718
			25.6667	5.56577	16.9518	4.31854	8.40696	1.98472	3.33732	2.93072			10.2398	5.40268	3.94072	6.78469	5.84841	13.5097	1.22244	1.88003
			3.36636	6.70727	26.2768	4.30567	7.27425	1.70724	2.08644	7.14347			6.52205	12.2025	2.26102	6.964	2.05085	1.21403	1.61664	2.30951
			4.75312	17.7395	14.0213	5.49428	4.12483	5.04355	13.216	4.07691			8.40565	5.25512	8.02876	14.3945	2.37992	3.53296	4.21595	2.20272
			8.58413	7.42244	29.511	13.1229	9.74404	3.58037	6.77787	15.5072			6.11827	2.41901	2.84235	4.07327	9.5259	2.00511	8.18237	1.3009
			4.94539	12.528	23.9173	7.25949	2.88523	1.3498	3.64374	8.07973			4.83462	6.50065	1.85807	2.13362	2.13354	3.74318	3.51126	1.42951
			3.98405	2.81407	5.64256	15.2355	7.47659	3.15967	9.36498	2.41898			7.02105	11.6965	8.67002	13.1416	1.24207	1.56959	2.36197	1.60255
			8.52888	4.80457	7.13812	2.78815	2.82002	8.03793	4.77434	2.83423			11.3617	1.59757	2.91745	4.8298	2.51018	1.87938	2.67815	1.63762
			21.5087	6.57041	43.575	4.292	3.12253	28.8267	4.39801	5.30493			4.72008	21.4568	2.40112	2.55613	1.26076	3.16935	4.3525	1.13877
			33.3238	3.00846	5.4452	5.53368	9.30372	1.92624	4.45654	4.10933			2.45204	9.91654	1.26374	1.17844	3.05051	1.20347	1.80115	2.16063
			1.8713	5.2321	20.2457	1.35105	7.49609	37.6374	4.55001	2.07473			1.45833	1.71608	2.64015	2.04631	2.86813	27.6773	4.32893	1.58696
			5.58076	21.4789	21.1569	1.97028	10.3948	2.01276	2.3701	3.66552			9.29053	1.64172	1.27747	5.56991	2.24285	1.41419	3.42673	1.608
			12.2499	17.5633	13.7746	1.94535	4.49658	30.0172	10.6646	6.66184			7.75344	5.76634	9.57197	3.08293	3.03522	1.03248	3.29099	1.78805
			4.60671	9.82049	16.571	2.89189	3.88417	3.40254	7.12899	5.58742			7.68256	11.2573	73.701	1.04308	9.01786	1.89246	2.80901	1.35234
			6.66586	12.1616	25.6174	1.86413	8.15219	2.59816	1.32566	1.34765			3.79582	8.21092	2.67481	1.57399	3.6452	3.34738	3.07154	1.13098
			3.41	5.93577	12.6111	41.7105	9.99747	1.07769	1.94338	7.14193			11.797	3.77897	2.14692	1.86816	2.66877	1.33674	1.30697	1.52694
			10.8289	25.3254	12.8886	10.0975	2.35954	1.35099	1.63859	2.86665			2.11484	5.42882	8.53715	2.55671	2.51245	1.43431	1.8426	1.68906
			7.57582	11.6015	3.23783	4.18343	3.90971	7.915	30.9015	2.35569			7.19072	3.42925	6.97877	8.73665	2.46997	2.73232	3.63724	1.27674
			4.29842	5.31022	2.9567	8.41029	14.0154	1.44528	4.12329	2.74856			2.10481	6.60115	7.52037	10.1987	2.89532	1.04757	3.03659	1.13877
			1.81053	12.5468	8.49339	7.93582	3.30336	1.0759	13.9784	3.17848			5.7689	7.91812	2.68059	15.2236	8.01594	1.66967	3.99649	1.47628
			12.051	1.24626	9.13633	6.65312	13.3701	1.01026	9.20161	1.60468			2.51002	18.5132	16.15	7.86761	2.28873	4.48497	10.8475	1.21126
			8.15428	7.0476	8.69999	8.1634	14.248	2.16373	7.45573	2.23451			9.46163	11.5588	5.9786	5.09877	2.75826	1.57814	4.37444	1.00783
			4.0183	7.94202	12.5129	7.26512	8.08026	1.55567	4.88	2.66751			8.04696	1.73002	1.04999	8.29363	1.1101	13.6873	2.1539	1.10682
			13.1798	1.22506	3.50919	7.08015	12.6804	2.20014	8.99029	2.84813			5.69875	7.29072	2.90878	17.2401	3.46566	9.91994	8.02063	1.25569
			9.08248	12.0175	5.20314	15.706	9.31582	1.55806	2.31646	2.14729			3.56029	23.3826	18.4254	12.0135	2.36859	3.91719	6.13901	5.78896
			11.788	7.2497	7.00656	13.6858	37.1315	1.44945	9.54786	1.73126			4.07145	9.00796	27.3894	20.9318	1.93361	2.13285	4.14605	1.00938
			3.24536	2.28433	14.009	18.8013	7.06182	2.65842	3.52833	1.00649			15.5097	5.49447	19.8704	4.93059	1.58076	1.07171	1.85479	1.98136
			32.8083	8.34595	4.78016	11.6512	4.16853	1.82121	2.26119	2.83732			19.4967	1.38901	7.92188	10.2737	1.49014	2.06345	1.38825	1.03433
			13.2914	9.88799	2.64577	12.0332	11.6861	5.92252	1.30534	4.22665			4.75659	4.2443	23.4407	15.2465	1.6912	1.0013	4.47035	3.42723
			6.96366	9.61603	10.0758	11.5909	5.64677	22.2782	8.55951	2.22524			8.55312	9.78931	7.1463	6.54501	3.11904	3.4359	6.34384	3.09285
			7.07857	43.0531	12.0123	18.7949	21.0954	2.34872	23.2613	1.24577			6.68242	3.79872	1.34607	43.7817	3.81115	2.09413	1.33054	1.71868
			10.2267	3.86492	10.9053	21.2332	5.28645	2.15657	25.1185	1.35614			10.8047	23.4784	18.351	4.05276	1.81241	5.70554	1.30616	1.55344
			9.28303	4.34225	15.0014	9.11718	9.63379	11.7442	11.6652	1.06747			8.47795	1.87584	19.3563	15.5958	2.18112	3.10347	4.18344	2.89409
			9.67199	16.052	14.2783	13.3609	21.3065	6.87252	2.64238	2.16427			4.94631	7.91638	5.37417	3.32378	1.3661	2.15146	1.20293	2.33211
			7.18686	3.90627	9.5665	6.71022	12.8625	18.2652	1.24926	2.51469			3.54668	34.095	9.53732	22.81	3.17115	10.9182	5.84397	3.02192
			11.8991	5.88289	13.6934	16.6863	4.09323	9.21169	24.3561	3.38842			5.55699	12.92	4.61448	28.762	1.61757	3.53597	2.41805	2.37186
			16.3953	7.27213	9.53463	6.27596	25.3977	39.2814	13.7126	5.93707			19.0428	6.21134	2.79902	1.24759	2.03952	2.52412	2.20754	2.35393
			10.1311	2.17918	4.95182	4.99889	17.8545	5.14379	15.5796	2.54942			2.00745	1.50055	3.20341	29.137	1.53545	6.83608	3.29343	4.40544
			5.54871	6.492	8.86034	11.4823	4.71639	18.4305	3.67382	2.52086			5.27348	12.4308	1.0991	15.3168	1.49524	1.82155	2.38148	2.06086
			4.81279	9.38893	9.86972	23.3587	13.846	15.9619	2.35791	8.50116			14.1373	6.12827	10.1316	4.62528	3.01539	15.6516	2.29857	2.10295
			10.4698	5.70836	7.58011	10.5688	10.3329	36.3855	12.2837	3.1067			4.72222	2.47594	4.31985	11.3326	8.92894	2.30133	3.10811	3.04842
			6.07966	11.2828	18.6997	18.4973	5.33015	38.8064	4.35087	2.98629			9.36283	7.01187	13.9936	1.79198	2.83585	2.60157	1.42726	1.64775
			12.4505	18.3328	5.99307	3.38084	3.16824	2.37378	7.14525	1.91573			6.80914	9.0341	16.6331	5.06302	2.39521	3.42835	10.6858	1.79039
			18.6583	14.0123	6.47822	19.7141	11.0589	19.0768	2.9358	11.1293			2.08477	8.27365	11.7731	8.87846	4.74511	12.6955	3.50882	3.43503
			5.92275	2.48409	7.25273	17.8652	1.18717	19.3071	4.22001	1.63401			9.72652	8.26494	2.88134	5.86291	14.2557	1.46649	1.8426	2.55269
			1.11825	4.76491	13.5454	39.7547	9.08256	5.30611	5.20837	7.53712			14.9148	6.03067	16.0806	9.38652	2.82396	2.11927	1.5061	2.42097
			19.471	7.21255	10.4849	12.6645	1.86612	3.30468	2.10594	2.40894			4.7931	7.31569	27.2991	9.32206	6.74442	1.39005	2.35709	2.72573
			9.71066	8.43286	17.0793	18.6075	5.14663	18.4998	2.17097	4.90588			5.39734	7.34997	7.1658	21.284	4.11133	3.22819	7.1867	1.36014
			2.4238	8.87305	5.94321	7.82725	6.80637	6.9298	5.40994	3.83224			8.06916	5.33471	28.7968	11.1199	1.15541	2.74741	2.00516	2.54412
			5.34374	10.113	25.1451	3.12672	1.01978	11.5163	9.2837	1.11146			15.4969	3.67092	13.868	4.25493	1.33438	2.39537	3.80468	7.58949
			5.62551	8.28988	3.44186	1.17815	5.51501	26.4685	1.04362	4.35787			3.94975	6.00685	1.78658	7.4744	1.71726	3.98005	3.97211	3.35786
			4.32936	9.88238	21.5788	23.4777	1.5784	2.75867	1.28584	4.35555			16.2257	15.2425	27.2081	18.33	10.4797	3.87092	3.06829	2.67039
			18.7092	5.26958	2.16369	2.62812	2.04964	44.236	3.6917	4.80014			10.7961	3.25555	3.7378	16.8123	9.1351	2.1233	10.2233	1.63372
			1.64699	5.60111	11.9399	3.28434	20.9172	31.1331	8.39939	3.64313			6.52348	5.86743	12.249	2.87842	1.38649	2.073	2.60581	2.28768
			1.97849	11.2969	14.5707	4.7335	30.6996	15.796	1.1883	2.39505			4.8919	9.97753	25.9415	25.151	10.8863	2.55228	1.05744	1.10604
			7.93826	4.36328	17.3799	7.77739	7.58751	15.7578	1.27283	5.43537			7.77492	7.56143	10.8126	7.70236	11.1905	1.4162	2.81226	1.81066
			2.22435	2.08876	17.437	10.0492	15.0372	38.0235	1.28827	5.44309			1.60009	43.0117	8.98776	2.126	1.61304	2.72981	2.62938	2.74366
			7.9471	5.72167	8.63421	3.62049	7.2971	1.82002	8.44978	2.39196			1.0925	11.5065	8.15658	1.60974	3.74319	2.81027	2.90167	1.3313
			7.55925	2.38035	7.9594	8.80033	8.78274	9.26361	16.5338	8.23255			1.7447	2.30689	14.4414	2.35395	3.9131	8.81203	2.66108	2.23
			12.7599	7.17189	27.4691	2.65787	38.6454	2.82431	2.06774	1.50665			1.91366	8.0651	9.6283	4.44421	10.8478	8.04559	2.25712	2.32354
			11.2074	1.46985	7.6351	3.22805	3.50032	5.10501	3.38203	5.77344			13.082	15.9739	8.47577	1.9168	7.79619	6.83307	2.80494	2.17076
			5.28241	3.55581	19.7204	1.47329	4.40784	20.5758	1.52724	1.64481			4.54611	16.1366	6.15553	5.01731	2.49886	1.43229	3.41372	1.94784
			8.20235	14.1629	69.9617	1.8392	30.6384	10.8658	3.09674	3.07968			2.07188	10.0292	5.09037	2.39673	11.0041	2.12631	1.95477	2.23234
			10.1035	13.5342	55.0246	5.15169	3.54738	3.45983	2.2937	3.93258			14.4888	8.08078	4.65564	1.73748	2.46318	11.2024	1.11352	1.45289
			8.72114	11.8849	1.14609	1.24892	4.629	2.11361	5.42294	1.41403			2.9496	16.2958	9.58931	3.46558	1.4335	4.21843	1.16717	1.47082
			2.83707	8.52469	11.3324	1.01007	7.60095	8.11311	3.04309	2.91373			3.76146	9.64408	8.03526	1.47103	1.1084	2.50853	3.15363	1.79741
			4.3277	6.84666	4.78839	2.55172	1.06684	8.80591	1.13141	5.91314			8.11856	21.0449	7.19469	4.11207	8.97935	7.39331	1.49635	2.0102
			4.96583	17.2148	2.61853	1.87217	9.94033	2.7169	2.19779	1.09448			3.14719	7.17801	8.67075	1.06705	2.13807	10.0683	2.67083	1.52772
			7.83384	13.223	1.28588	3.37039	10.0378	5.74052	1.51179	1.2805			6.86426	4.25418	7.16797	18.6509	10.4667	5.07187	5.95126	1.84573
			19.2827	3.60067	1.40974	10.4666	26.074	1.93161	1.26308	2.92994			1.39891	2.11808	1.35473	4.8249	5.32848	7.05284	1.86779	3.02114
			2.99674	4.86865	6.65759	8.84858	41.4049	1.11946	6.1065	1.7027			1.1734	1.10494	7.17952	8.30643	2.95762	9.81182	1.576	1.03433
			7.22443	4.14389	11.9126	14.3187	18.9577	6.88744	1.52886	1.06284			3.22523	5.25512	3.441	2.04148	4.67771	4.06655	2.6944	1.69842
			29.3635	6.78919	6.83387	13.5443	8.45335	1.62787	2.04498	2.45834			6.42469	8.51184	8.21291	1.57179	8.99181	1.02996	2.62125	2.18401
			5.22053	14.5492	1.42619	4.11266	11.7762	10.2816	1.1501	6.06829			8.68414	8.28528	19.3173	1.45601	11.1927	1.9508	1.74262	1.33598
			10.8985	4.16351	6.99782	4.02983	13.5838	2.46568	4.58577	7.08172			1.76403	9.2688	10.7462	1.86374	5.33924	3.66372	2.82364	1.03745
			4.95533	2.71259	30.5096	5.13158	2.4113	12.6118	1.29315	9.35714			4.87042	4.09209	5.77352	1.03514	1.35534	2.19018	1.97752	1.92913
			26.054	5.70415	4.20918	17.4599	5.42762	1.28475	2.12545	7.66602			4.19315	7.25296	8.18186	8.08301	2.80357	1.38401	2.21079	1.88549
			4.68351	4.90299	16.9431	12.2391	2.41534	2.69542	4.15743	6.73362			2.5537	4.93445	4.6672	3.24434	2.75769	3.66975	2.30183	1.15904
			20.4457	1.10677	15.2065	9.26033	4.08113	1.14035	10.9475	2.2538			26.8994	7.2791	41.5094	10.4809	1.73764	1.26181	2.05392	1.51992
			21.97	5.37612	2.33894	11.258	2.85834	1.08724	3.97618	8.65861			8.13002	9.36175	4.57621	9.40009	5.82293	3.96043	4.07859	2.07645
			6.6073	7.89806	22.9284	5.74116	4.73925	1.88268	19.5801	3.70334			7.67397	2.25112	12.7169	9.39476	6.07043	3.70194	5.44651	2.47787
			4.73434	1.84344	15.8366	13.5523	24.913	17.7336	1.94582	4.65503			7.67111	2.85296	16.7082	1.99454	2.95819	32.4695	28.6371	1.04134
			14.25	6.60835	19.1936	8.84215	5.34292	29.2289	7.41428	6.87873			1.0789	18.6404	13.5965	14.7091	1.97269	20.7134	2.68953	1.87302
			2.94591	3.98267	6.73365	5.82238	11.676	14.1974	20.5433	2.37344			4.1502	7.05718	1.61398	12.2536	1.08575	1.33171	1.27608	1.41548
			4.30173	3.80043	23.2378	9.66484	23.629	8.08805	5.31809	3.53044			5.95505	5.19006	10.7028	10.9784	2.78998	1.04555	2.16284	2.01877
			9.97531	1.94788	7.53848	9.23379	5.45854	2.98782	28.4087	3.00558			2.45705	4.59402	15.1888	9.52744	1.10897	9.75248	1.48009	3.28771
			5.30451	14.062	7.4136	7.98085	6.7089	3.20264	2.5164	2.3333			14.9141	8.6867	10.7866	2.85445	1.506	1.24622	1.36711	2.03046
			1.09173	3.66515	15.1746	21.0756	9.79848	16.2525	5.58713	6.83782			2.24227	5.6124	1.56849	2.83379	7.1896	1.47957	2.3766	4.07652
			1.43704	7.52937	9.16819	16.8769	2.82809	5.60208	39.6975	3.44785			3.03909	9.23394	5.92878	30.5137	3.32237	4.13947	1.88324	1.1871
			19.8412	8.14338	19.4686	7.95592	8.79484	2.32963	3.86239	2.48073			3.06415	1.25365	17.8824	2.52338	2.40427	1.77075	1.50448	2.11854
			4.03266	12.5158	20.9369	5.84571	14.1452	10.8485	9.58687	2.16118			7.03895	8.78546	15.2913	10.362	2.58381	2.94053	1.79871	2.49657
			3.2763	6.98054	22.3117	3.92448	4.16651	14.4307	6.87784	3.96808			3.41566	6.91602	6.82062	15.6087	2.9463	2.0554	2.44	2.63142
			2.71828	8.5366	13.1291	7.38736	2.59617	34.8919	12.1187	3.11982			6.5149	4.32389	10.5656	7.60299	1.03137	3.44042	1.96777	7.22471
			12.4494	10.8742	7.55442	15.5274	3.63208	3.83756	31.7143	2.65362			4.06859	1.68703	9.79006	1.84309	2.22246	1.19743	1.13303	1.90341
			1.20775	5.99924	5.83015	5.35032	1.47488	16.5556	18.2472	4.92826			3.62973	4.51211	6.44366	27.4236	2.19811	3.4359	2.54322	2.14894
			5.80673	6.68055	9.36811	6.52928	5.54324	12.3833	2.44406	2.97162			3.31401	1.38727	1.85012	11.5536	4.61371	2.3652	2.97238	1.97668
			7.75483	4.83921	33.8343	3.90035	5.70391	8.81009	11.0605	1.60005			4.02349	1.37623	32.7166	17.1332	2.71804	14.9471	1.55893	1.919
			16.0373	5.03126	16.6296	8.15536	1.74512	22.1165	6.12438	1.9003			1.84708	9.09045	1.21897	11.828	1.41255	1.4338	2.80251	4.46234
			14.903	3.44156	4.97597	3.82396	1.91587	22.2526	7.70689	1.81462			6.0653	1.19091	7.56442	4.25601	1.98289	2.83089	1.71418	5.75311
			25.6551	3.02521	10.5188	3.75881	6.38152	82.9112	21.3626	2.35028			7.36111	1.62952	2.20469	5.44228	1.10727	1.83814	1.98159	3.66263
			16.4959	3.99739	11.2276	2.222	4.16516	5.21123	14.3043	3.13062			4.23183	2.41959	2.10143	16.9399	1.09764	1.68727	1.53943	2.71404
			17.7517	8.78052	3.86586	8.16903	1.08095	36.5585	9.75756	6.26588			3.91323	1.65101	19.0847	7.73629	1.30097	4.29035	1.96614	2.00864
			10.2212	2.36633	5.97405	21.9642	13.0736	39.831	1.43295	3.26801			6.33878	1.65392	2.66759	6.04966	1.43124	1.02594	4.49473	1.91978
			8.59352	1.87919	6.47514	3.64221	1.45471	4.43906	6.92498	3.89321			1.06314	9.43145	10.0016	13.0296	1.91662	6.39704	2.25306	2.08425
			22.8573	4.20977	14.911	6.45288	17.3847	13.5093	6.62669	2.98166			4.57117	2.54565	10.9527	1.90881	2.36859	1.89648	2.87078	2.39758
			11.2295	12.3209	10.8904	10.317	7.99286	6.638	8.84642	5.23469			2.81573	6.36413	4.95172	10.2134	1.08291	2.3486	1.17205	1.67426
			10.8704	4.31141	32.9513	10.6427	6.00641	3.40254	2.20267	4.29226			24.3471	6.7975	5.34601	2.47206	3.96974	6.35127	2.17422	1.86678
			15.1174	10.8707	36.6486	6.44323	1.96359	4.0846	14.4035	3.88395			2.79137	14.7121	5.12431	7.18462	1.20242	1.81501	1.81984	3.36955
			6.8062	4.01632	4.35822	5.50473	6.85208	5.4899	3.53564	4.35015			6.46836	12.6522	1.68692	21.4844	1.79372	2.5045	1.47847	3.37111
			6.0316	5.63195	7.16177	6.82602	4.789	10.4356	6.21542	2.35877			8.05198	20.2711	4.07937	12.456	2.2757	1.31813	3.64293	1.90185
			10.8781	1.72498	14.4371	6.86462	4.72513	2.38631	4.6451	1.87328			4.52534	8.12726	3.30379	5.7574	11.5547	1.48963	1.23626	1.56747
			3.55641	3.55511	2.14981	3.81109	33.3381	9.67177	5.11002	2.13031			1.3982	39.2403	8.30823	16.1773	1.72858	2.11827	4.02819	2.63999
			1.64699	1.55045	9.41231	10.7513	13.8131	5.35921	9.98921	2.62352			7.19573	21.6096	2.14259	3.28909	1.12086	1.77277	1.26877	3.51921
			3.24646	1.82241	1.35372	4.78738	4.16113	3.49563	4.76214	1.53598			11.4025	13.0309	6.5982	6.24586	4.99715	4.2139	2.79031	1.79585
			13.3881	6.84877	1.21804	6.52847	3.06404	9.1544	43.3624	2.37344			3.88531	7.76998	32.006	2.13411	8.20794	5.16441	1.96614	3.46543
			14.9616	3.51445	3.17307	6.25665	6.22556	20.4129	16.038	1.37312			23.9268	24.6264	19.0587	5.16911	4.59785	9.81031	1.21187	1.82001
			2.55143	3.81024	5.13221	7.57554	3.66838	14.772	12.508	1.6533			8.9791	3.60063	1.15615	5.18319	2.2893	1.17883	1.40532	1.08967
			7.71781	11.2071	9.17333	1.52958	2.53701	5.95355	7.22409	1.24499			5.50831	14.9596	9.56765	4.80862	3.47756	1.78232	1.52073	3.04375
			3.45697	1.74952	7.31235	10.42	14.1667	9.02611	6.6023	5.97335			8.15292	4.18272	14.5641	10.9781	6.85147	9.24554	1.09889	3.8458
			5.49899	14.601	1.53154	6.76249	5.74962	2.15896	36.2578	2.47532			2.31529	11.8644	3.71903	10.5066	2.18112	5.10104	1.44352	1.53473
			13.0052	6.45765	7.9594	15.8129	1.03188	4.26601	12.2284	26.8465			11.2085	2.63337	14.8234	2.43889	2.51528	2.26663	1.96208	1.22607
			6.01005	21.1841	9.16048	4.56784	4.508	9.98744	2.03198	6.41253			11.2679	10.2482	8.56242	1.32646	12.1579	2.35815	2.69928	1.21984
			38.625	3.55651	24.5247	4.07728	3.63276	3.25992	3.46412	7.24999			3.99556	14.3647	3.20342	5.5687	2.24002	6.25975	1.3915	1.18398
			10.9632	11.5499	9.94013	1.10336	2.62306	2.42212	5.70905	4.76231			6.7175	21.9726	2.51233	3.66678	9.68222	2.54826	2.72285	1.39521
			11.8842	5.55766	5.73712	4.55739	2.05099	1.60401	4.99623	9.35096			9.56186	7.48823	8.48516	3.06504	7.76107	1.7265	1.50935	2.64857
			3.27133	3.84529	44.6918	4.26546	9.30171	2.96992	7.54027	3.44014			8.51804	12.152	4.2238	6.7409	4.33449	1.13155	1.73856	2.50281
			6.24928	6.1149	4.89529	18.8641	2.2903	1.63861	4.62722	2.75936			17.1521	2.84135	1.27675	12.1816	2.40031	1.37245	1.31185	1.31181
			26.4082	15.8178	38.305	1.14759	7.29777	1.14154	3.32025	11.0776			9.25616	4.99951	21.7567	1.26231	1.56207	3.17891	3.08861	1.20113
			2.00335	5.03196	10.9228	1.71535	5.04579	5.24643	10.2932	1.89103			8.6376	5.51654	13.8738	10.3601	6.19956	1.45996	1.81821	1.00627
			6.13988	6.4941	13.0716	1.65745	3.28185	5.50124	11.9277	3.50497			32.694	2.63512	5.08459	11.7745	6.20127	3.04061	2.38229	2.61115
			2.88016	19.061	24.0344	2.87179	3.61393	11.7549	2.53916	3.03492			18.8302	17.3618	29.854	13.3447	2.17942	2.86509	1.32241	2.62986
			23.2606	4.1523	53.4812	7.63826	8.41032	3.34048	14.1344	1.14697			9.6084	3.7569	7.35717	1.62655	1.47711	1.3463	1.74913	1.16372
			23.87	8.69221	9.16254	6.29043	3.25428	3.73253	14.0824	2.33716			5.8362	1.55225	1.56055	1.79459	2.53114	3.62549	1.82553	1.95408
			5.78242	15.3398	15.0482	4.39574	35.7656	2.87981	3.317	1.60468			7.96106	2.6264	2.97667	6.17764	1.85092	2.79167	2.76268	1.82625
			19.7943	8.26955	10.8945	3.5827	1.89436	1.93161	10.6012	2.60499			25.0372	11.8737	3.31246	1.4895	2.34707	2.25254	1.2647	1.10292
			4.48682	5.42799	3.80727	7.8176	15.536	8.48129	11.2019	2.51083			4.49885	11.3288	1.58293	2.12347	25.4621	1.77377	1.39312	1.22062
			6.87968	3.9308	9.7916	4.36679	7.94984	13.2354	18.2789	3.082			23.5238	7.18557	1.23847	9.5168	3.25157	7.41343	1.06313	1.25803
			1.99451	4.75159	3.33239	9.95435	7.24803	2.0784	2.73342	4.72449			12.7406	8.7599	3.61071	1.44381	3.06976	1.95281	2.24005	1.26972
			19.2788	4.41795	13.547	25.3451	3.98904	4.77084	6.00734	3.24949			9.87615	29.3912	1.13087	4.04698	3.2006	1.63547	1.12328	2.06554
			5.81391	2.88292	6.03161	3.23287	9.35279	2.07602	1.64509	6.38783			9.57761	7.19428	14.9108	4.3915	1.43747	1.96639	2.06449	1.96031
			1.35638	4.01632	3.92343	32.7614	16.4765	6.69588	1.41426	3.0025			7.50072	9.17178	17.7293	1.77362	3.28272	2.71371	1.33379	1.09201
			6.13657	2.02919	8.37724	11.4349	9.31582	7.11717	7.56465	4.4775			6.20275	4.69627	2.16859	3.81229	2.56002	1.77377	2.13195	2.37576
			6.2769	2.0383	5.37839	13.3207	10.942	3.10239	2.57411	3.28345			12.8966	12.2316	1.40817	3.36701	11.0829	2.99937	1.385	1.78572
			15.9793	2.7946	21.6235	7.52165	3.0069	5.78647	3.18289	6.10688			2.29382	3.76213	1.92523	11.9022	2.89702	1.10741	1.83366	3.12325
			8.18854	1.65139	10.2064	11.3947	1.46749	12.7079	7.19077	2.1195			14.2354	4.55917	2.10143	2.27211	3.48152	3.12208	4.19157	1.98448
			13.6245	3.42333	5.56906	7.92938	2.09199	20.0125	1.6264	1.47886			5.35295	4.99951	1.6667	4.04573	6.89168	1.76673	1.00298	1.608
			2.86192	5.41817	3.79442	16.0783	1.99788	2.00142	2.47089	1.90338			6.439	7.52251	13.208	9.79092	1.87414	1.66665	2.76837	8.32685
			7.97141	12.7085	9.43493	10.9419	4.03206	1.57775	4.62153	2.13803			10.62	7.64567	6.98888	1.39218	2.82452	3.44646	14.8855	4.16459
			5.60949	7.36816	7.37762	15.5612	4.72715	3.45327	1.5313	1.22415			1.08677	1.91708	13.9879	3.93808	7.17317	4.05398	2.05067	1.7826
			9.30844	7.08358	12.388	8.36687	1.91923	4.54886	1.32241	1.72663			6.61512	2.04663	28.253	7.19682	4.27332	1.54394	3.26254	3.73901
			6.11613	5.79247	9.88668	12.387	1.38816	2.19119	1.38418	1.49199			8.74428	2.43818	4.11981	1.7924	3.5172	2.55831	2.63995	1.555
			3.61995	32.4789	5.51716	4.57508	4.84277	8.42282	2.90654	1.67569			3.57317	5.5026	12.4808	7.64836	1.18656	1.10389	4.97754	1.44276
			15.4577	18.4183	8.41064	13.8016	7.56868	4.95702	1.13628	1.45031			8.18801	1.45873	8.20785	14.3007	3.95161	1.8477	1.92388	3.63379
			16.7218	8.9123	26.0938	16.3646	10.6905	9.00701	1.77839	8.04576			2.55011	7.7514	2.39317	2.04774	1.35024	1.77679	2.98213	3.05466
			6.60398	8.5352	8.1511	1.24731	4.11273	11.7943	4.20132	1.9551			4.59479	1.37855	15.422	6.80411	2.40484	1.50421	2.28801	1.38898
			13.6654	27.2465	13.0628	3.24815	8.52662	8.52784	2.54973	2.69993			7.45562	5.09595	15.8438	2.3641	2.22473	1.17732	2.22867	1.1037
			1.78953	5.46654	3.58217	3.92609	5.61585	5.31565	2.00109	3.20009			11.3216	9.69578	62.0434	2.27711	9.11528	10.6125	2.18722	3.03127
			2.04865	23.1495	10.1863	1.73224	2.81263	9.95879	3.62505	4.64268			2.1177	4.08628	3.94866	6.03714	2.05765	1.03298	2.59849	2.56127
			1.55693	8.463	10.3657	6.14165	7.66347	2.517	1.32079	2.98166			12.9296	16.4689	2.04293	5.9586	2.0146	1.17128	2.31077	2.12166
			1.52544	12.7639	2.73622	2.1657	11.8307	2.50685	1.61664	7.24536			10.3952	1.04742	2.8344	4.00317	1.47145	11.7133	3.94691	2.7421
			7.07636	6.75064	3.21367	2.33298	10.2368	1.48108	2.56436	1.39859			9.20032	1.80787	10.1959	10.5629	3.86326	1.53237	3.71039	1.32194
			26.7391	7.78941	9.97816	10.6685	6.86687	3.15669	2.06124	3.47641			9.34708	1.87409	4.85134	9.28931	1.66685	2.47282	4.46548	3.06479
			25.7701	4.17052	11.2861	8.29529	34.8466	25.1205	2.93743	3.70256			3.96048	1.59408	13.6557	18.1602	1.52016	1.78283	3.92091	3.09675
			2.25363	10.9955	8.11616	6.06284	16.4133	9.48081	2.41155	2.69684			10.673	22.3944	3.02216	3.69307	3.28499	2.19169	3.16176	1.73505
			3.61664	16.8005	28.0427	12.4474	11.5705	40.0924	1.41507	3.97117			17.7112	3.28344	15.2386	1.8553	3.95898	7.12526	3.26579	1.25101
			5.61004	5.65299	8.09714	14.3059	5.29519	3.59529	1.70117	5.02011			7.6575	1.16187	12.8144	7.15301	3.49172	24.2369	10.3566	1.50901
			6.96973	4.9829	6.22948	5.27714	11.0078	29.7379	1.85723	12.9686			31.6416	1.09099	13.9684	12.9041	4.18893	3.00389	1.53618	1.98915
			16.9467	6.84526	19.115	10.9725	7.19224	5.72978	1.5378	2.5309			11.9466	1.10029	15.1982	16.9518	1.54791	2.54021	2.61556	1.67348
			4.16748	12.0335	12.2261	18.934	4.83672	1.41544	2.38473	6.41948			10.8376	1.02767	8.38766	7.42025	6.01266	4.38188	2.54729	1.62125
			3.20282	6.1135	28.8794	5.34469	13.403	3.23665	2.15959	7.79723			14.8282	6.11433	1.04855	9.17822	1.95797	1.73857	4.18018	2.48254
			15.6373	5.15042	24.9909	5.54574	17.4761	1.69829	1.46709	3.06965			1.06243	8.01746	5.86595	3.59888	2.13298	16.6856	5.07019	2.36173
			7.65704	6.92447	11.76	17.3103	2.26274	1.3313	1.54999	4.8449			11.1054	9.7318	11.1383	11.0163	1.90246	4.29738	3.52995	2.6509
			33.7614	2.98946	21.1733	9.77421	19.5728	2.30218	1.63452	2.65439			23.8345	4.86938	11.1787	12.1607	1.46862	4.03285	3.29831	2.73197
			3.30392	2.88852	8.90454	7.76693	13.4494	1.47094	2.25631	5.79196			3.2868	4.42729	5.27813	8.87281	1.14012	1.30606	3.12924	2.19337
			4.98904	4.42846	12.4055	33.2656	5.13385	1.43692	2.9927	1.16009			10.416	14.0406	13.5466	1.0899	9.49192	1.12602	1.71743	1.61969
			1.19118	9.09103	1.10857	9.98571	2.85633	2.08497	1.09239	1.36232			7.33176	14.7522	1.31285	3.7641	1.17976	4.20233	2.11326	1.53396
			10.9483	3.28315	17.5043	11.233	6.32303	1.4041	1.69467	12.0509			8.81086	11.6628	7.42577	9.10312	1.78522	2.74087	2.67164	2.36095
			5.43213	1.17826	18.8344	6.01137	15.1838	4.11683	1.58413	4.81017			10.1453	11.0337	3.6692	6.57474	1.29021	4.3864	3.48037	1.05382
			3.02381	5.93616	5.47141	6.51721	46.9704	4.11384	25.0551	3.51886			12.1685	10.2482	7.89805	3.4346	1.08518	6.65353	2.6627	1.8052
			1.87572	7.47119	16.5325	2.48014	5.80743	12.1243	8.38069	12.9702			8.26175	25.8672	16.7638	9.13003	2.10013	2.84347	1.65728	1.81222
			14.1306	11.4462	15.7811	1.43227	4.23306	53.8947	13.1152	1.49507			1.55928	10.8269	3.30379	2.64166	1.20582	1.55098	5.81064	2.55893
			4.67467	14.4398	18.8334	2.38444	9.02004	4.37402	5.97239	4.32159			12.9174	11.2933	1.62409	11.0695	1.54168	1.56054	2.50096	1.71401
			10.7648	7.74736	19.3833	3.67437	9.46976	2.07065	4.33299	8.98974			6.18414	13.4079	5.84934	12.503	2.65574	3.45752	3.76323	2.91436
			4.31278	3.97426	14.7496	5.6149	2.174	2.5713	3.90059	8.39078			2.9045	13.6188	13.6282	7.34295	1.0495	13.7094	4.5687	1.76623
			5.54208	10.8188	20.7257	2.68119	8.69401	4.8687	5.09376	2.18356			2.42769	7.75198	9.00293	2.18824	2.26324	2.5729	7.83856	1.26582
			7.38024	10.7284	17.0973	6.64749	18.0186	22.0718	10.2704	2.76554			5.02721	11.1243	2.11804	1.05234	4.71453	4.72637	8.43596	1.55656
			9.61729	4.51187	17.1291	10.0967	3.24689	2.35708	1.25576	3.04726			12.5308	7.34532	13.3842	2.70237	1.77616	8.91814	1.50285	2.39291
			2.69673	12.2277	14.4664	5.63581	1.39892	5.7441	10.0485	4.10238			6.9874	2.20697	12.3399	11.3439	1.23414	4.03285	1.07939	4.2667
			1.89782	3.15137	23.9353	2.80745	4.4838	3.30587	2.03442	4.10778			3.13932	6.02021	1.31213	6.11913	1.1809	4.12438	2.95287	4.91286
			1.95639	3.71422	1.5927	1.02133	16.5464	10.1742	4.68493	6.42334			5.12171	4.00321	15.2299	9.23142	6.60736	6.15766	3.36983	4.44909
			8.86258	3.86492	13.3928	6.44805	16.7729	25.4099	4.84099	1.80999			3.63617	1.86247	13.6542	9.67639	3.17058	3.35845	1.69223	2.44045
			4.93434	5.38733	3.4727	3.10259	6.28741	26.9739	2.8846	3.96036			7.51647	11.108	22.1264	9.56217	4.08585	10.8257	2.07018	2.44591
			5.00175	3.51445	16.1876	1.5899	6.49311	5.14738	15.3553	8.15537			3.74929	4.70905	12.6461	1.13089	5.98434	12.3254	6.51209	2.39524
			13.1085	4.50276	7.47219	8.99655	9.16457	9.69206	7.23791	2.33716			3.68987	4.70672	2.25958	12.0486	3.73469	7.04831	3.10974	2.15517
			2.70612	4.48944	16.7324	4.47053	9.27146	15.753	8.02875	3.26029			6.35309	12.2054	9.73662	9.18073	5.6683	4.82846	1.83528	4.95261
			6.9189	8.17843	26.653	16.1861	1.21809	12.3356	1.75482	1.95664			7.98039	1.53657	5.85006	8.58117	19.489	1.97292	3.82662	1.67893
			20.1269	4.6857	8.05808	9.72998	14.4672	15.5287	2.81713	1.62089			3.81372	4.82233	7.74496	11.9519	1.51053	2.94254	4.14849	2.18713
			1.73484	1.33667	4.21175	5.47739	5.61921	21.3181	14.7424	3.66938			2.32746	6.51226	9.49976	8.25574	8.19378	5.29466	1.41426	4.74372
			13.6914	2.02708	20.7319	7.55302	4.61556	12.8446	5.4262	4.17339			2.90163	6.91659	2.00322	1.94917	1.04723	4.4201	2.76187	4.64162
			3.96637	3.31118	3.05486	4.66676	34.286	32.3122	3.22678	1.76754			2.55513	10.5916	11.95	5.18194	3.63558	7.12375	2.4717	5.66659
			9.34657	2.3397	5.90569	37.8664	1.17708	5.31685	26.0646	2.21907			2.23439	25.4484	8.94732	4.24537	2.59911	4.145	2.59199	2.20662
			5.32053	3.35955	4.73905	18.3542	1.3969	16.0848	7.94178	3.46792			4.29768	8.02676	6.61625	9.92266	2.52265	1.31864	1.23382	1.58228
			14.3218	2.15816	17.5958	15.1567	3.91845	6.7484	2.08725	1.72277			8.91395	5.92088	11.3882	32.9366	8.36426	1.11093	1.65159	1.24634
			7.07913	8.32352	21.2201	5.98483	19.2797	2.47403	2.66596	1.89026			4.70934	4.86416	5.87967	14.9898	4.61937	2.36369	4.29073	1.9837
			1.17184	1.2091	15.0374	11.5652	3.71611	2.25682	1.21187	1.01653			5.15822	2.31037	3.5681	1.86406	2.0956	4.52772	2.14252	2.32354
			12.1129	1.98713	12.7026	9.2362	3.67174	1.39336	8.50993	1.35383			5.5842	6.21483	12.1334	16.9026	4.25123	3.38259	2.57736	2.66415
			22.8054	2.74624	5.04125	10.5318	2.39651	26.8593	17.08	1.87096			2.07689	8.40262	9.87094	3.29566	2.18225	3.45099	2.86346	2.37186
			15.0411	2.01797	1.04844	4.89434	26.4941	3.41269	19.3623	1.31369			7.9496	15.7706	9.45499	26.5624	1.89227	2.74691	1.88161	3.13026
			15.8362	5.20439	22.3061	37.3043	8.82308	2.63336	3.23085	2.42284			5.89205	5.79365	9.11269	19.5449	3.02559	3.99111	2.87972	2.95723
			41.5659	3.2509	1.2905	4.70375	9.7353	1.28237	2.4018	1.54833			2.30241	4.98557	1.65659	5.3384	1.74274	4.37936	2.67652	1.7296
			9.11286	4.82028	21.9956	11.1124	5.11234	2.41973	39.7398	3.83995			5.814	4.15367	3.22364	6.91739	5.36643	2.99836	3.1138	1.09824
			35.7327	7.19152	2.1935	3.717	5.99095	2.68468	5.43188	2.13803			5.75745	2.84483	5.29835	4.83491	1.55641	2.28523	1.74262	2.7078
			13.2754	10.6695	5.74637	19.743	3.24017	4.22901	23.2206	1.86479			3.53594	2.34929	1.09477	3.75378	2.39295	1.41872	2.4782	1.37027
			4.41057	9.43029	6.10973	3.24172	2.05031	6.11766	2.09619	5.75183			13.4142	2.38706	13.2253	7.22968	5.26278	1.81803	5.65296	1.51915
			1.56356	5.67541	19.9275	6.54858	6.56638	1.43871	12.582	5.82361			3.63688	2.37834	1.54033	4.34394	2.16696	5.19056	1.01762	1.6992
			13.0455	6.05462	18.8241	10.8816	1.71285	2.19894	16.8939	3.29734			4.92483	3.93408	10.1685	3.45024	5.00055	1.70487	3.56003	1.73427
			7.81616	7.37867	21.1266	5.6913	7.84363	1.02876	15.6527	2.87205			2.25587	2.5015	6.49133	1.64627	12.3827	11.0304	4.78328	1.02965
			9.5521	4.20557	28.2575	12.0115	1.58715	1.52703	16.6135	13.6054			2.78494	2.29876	15.5802	3.53066	4.53328	3.89958	4.9434	2.07879
			12.9063	4.62122	17.4329	10.3862	1.05003	2.87384	3.81443	11.3771			2.22294	2.82392	1.88334	2.15132	8.85474	1.85776	1.8044	1.00627
			15.7931	22.34	15.4568	6.28239	5.12579	1.48943	1.60526	1.80227			2.31744	8.74189	1.16337	10.7954	1.10104	12.6573	2.50746	1.38976
			6.60177	3.28805	7.48349	28.0946	5.12982	1.44826	8.26446	1.54679			18.4228	3.63432	19.5491	7.72566	3.94199	1.98952	4.10622	1.18009
			12.0643	25.0659	10.5152	9.74204	6.76469	27.5855	18.8316	2.09094			13.3634	6.74464	9.06431	2.37631	2.52718	2.33703	2.30751	1.13098
			16.339	11.613	7.51227	22.3237	16.3555	1.60878	8.92201	8.43786			3.03694	1.42154	1.80896	8.00728	5.23163	8.13913	3.67382	2.12867
			7.35648	1.55746	3.46036	24.4379	4.20819	9.96178	2.6497	11.7205			8.43214	3.98985	1.6602	7.02127	9.34749	5.57026	1.56462	1.40924
			9.39021	12.9419	21.9725	4.47616	11.0845	2.2431	1.99947	1.61317			1.80842	9.95778	7.62436	2.17385	1.06932	10.3182	2.62369	2.60336
			5.12385	2.51773	1.71913	9.6383	7.47726	21.6004	1.80927	9.85807			6.12543	6.3862	3.15503	3.68337	1.05233	2.6594	1.77351	1.16683
			17.6649	9.53332	12.6131	16.7458	6.75326	29.7326	2.64238	2.1087			2.31959	7.56666	18.6594	1.05234	1.32532	3.66975	1.67435	1.78416
			9.70293	1.69274	17.3522	1.44032	7.50348	10.8784	2.80007	2.39119			1.63302	3.55067	4.47222	3.33071	1.17127	1.19442	1.13222	1.76935
			6.5084	9.92724	10.4433	18.8616	5.68105	72.3998	2.92198	3.50343			6.72537	1.45988	4.23319	8.35963	2.58891	2.82486	1.83285	2.05307
			3.05585	4.57075	12.4954	10.8896	8.58107	12.0432	13.9987	3.44091			2.6933	3.74528	3.9956	2.24175	1.81467	1.27337	1.6646	1.73038
			2.47131	5.15252	12.0242	29.7086	16.3118	34.6066	9.68766	20.0048			11.0001	12.1148	7.39328	9.08278	2.16583	7.40538	1.28909	1.03978
			5.66474	10.3352	12.4682	18.0791	7.48533	13.9056	2.28801	3.66552			5.78609	1.58072	25.3313	1.96482	1.35534	1.76271	2.79681	1.39288
			6.05701	4.05907	14.4823	8.30575	9.34406	2.15001	1.9572	3.72881			4.69717	6.77775	1.93461	1.64251	1.2987	2.09061	2.79682	2.27989
			16.8765	2.69226	11.1592	2.69888	4.96176	3.10895	6.53647	2.25843			2.22007	4.01948	20.9233	1.19097	1.9472	9.27622	10.4988	5.3626
			23.7805	8.41674	29.1898	11.1373	4.34599	4.64612	5.93988	2.83809			1.26861	8.10518	9.77417	10.1329	1.36327	1.06567	2.24168	1.70387
			60.1485	11.5015	23.4568	57.5017	9.498	9.70578	2.17828	3.22633			4.81529	2.14945	3.75874	2.6886	2.04859	2.10318	1.54024	1.32506
			7.2504	5.34948	30.8678	8.87512	17.4687	1.25611	4.83367	8.55364			5.72308	2.61885	2.04655	52.1996	1.32306	4.17568	1.0485	1.64697
			5.92165	5.8205	26.5255	9.01746	32.1792	20.3812	1.02981	5.07877			3.72852	2.31211	1.3374	1.31958	1.00249	3.49273	1.68492	3.93232
			7.83052	10.3331	2.71361	4.88389	14.2272	12.0575	3.09511	1.34379			9.26188	1.32104	1.1186	4.0135	1.6255	11.7516	2.04011	4.89494
			12.2919	2.65441	2.10099	5.20798	23.1074	5.10381	3.96561	2.57644			2.35181	7.20358	5.72369	4.49508	2.75259	1.78132	1.51992	2.97905
			9.55818	1.5112	22.1226	5.9591	15.8903	4.57213	2.95953	1.45108			4.60052	18.4522	1.01677	2.21202	3.90347	4.47994	1.72881	3.64002
			9.38635	3.74646	17.9787	4.05315	10.2677	5.84256	18.0549	1.57766			1.96449	4.06944	1.38723	13.2853	11.7818	2.64331	1.55893	2.29002
			7.26532	13.6155	19.5976	1.97189	4.75538	4.89197	2.81119	3.6084			4.0915	3.57448	1.71436	1.60152	2.80583	1.91006	1.15985	4.00403
			1.44698	3.44436	21.4627	1.83035	19.1331	1.30862	6.18629	2.18279			3.15292	1.56155	1.75841	1.70228	3.56931	14.6156	1.73856	2.799
			24.2507	3.98267	17.3722	2.9128	21.7831	3.4109	3.58657	6.40481			2.999	1.45001	1.07238	1.62154	1.86338	4.77314	1.73043	2.07333
			8.80678	2.75745	2.01208	9.70746	4.97722	1.8606	5.78123	1.75596			2.7334	5.98826	1.86096	1.50921	1.23244	4.93659	1.63859	2.39992
			3.26028	13.9309	3.18386	17.3747	1.65706	2.08377	2.7207	1.59618			1.22494	3.39381	1.69775	2.51086	6.29075	1.32719	2.23436	2.16453
			6.30453	2.67614	3.99794	3.40658	11.6021	1.92624	1.78013	5.08881			2.51074	7.06415	2.12598	1.71824	1.80674	1.48409	2.0775	2.90812
			9.68967	7.34222	17.2227	10.658	8.79887	2.3714	10.3084	1.97362			2.55799	4.86415	10.1316	5.03486	5.43213	3.70646	1.13466	2.31418
			19.7257	6.82283	3.7199	8.04036	2.01603	4.56079	14.5767	4.86651			2.13989	3.05804	1.47822	6.77031	1.27378	3.08688	1.7093	2.36251
			4.81997	10.2097	2.10664	3.18864	16.8475	1.24895	4.05475	6.76526			5.05871	14.7348	2.20542	10.8645	2.69199	11.6409	1.28827	2.38979
			9.65818	4.10674	24.7576	32.8981	4.36952	2.73361	19.5899	3.78901			7.67254	2.92674	3.97033	8.27733	1.5615	1.43079	1.35005	3.68211
			6.61614	5.4364	1.51099	3.26745	2.79985	3.46162	9.34887	1.37775			2.27735	2.33535	1.49411	9.44296	6.77784	1.90604	3.37715	2.32977
			11.3217	6.78498	28.774	2.41339	9.74807	1.1845	9.93594	1.51669			10.116	1.26876	1.12148	4.25789	1.90529	3.21964	1.79627	1.60722
			5.70231	7.53918	1.68419	6.12315	13.4514	3.47833	4.16207	1.84858			2.74341	2.89305	17.1292	1.0076	1.39612	2.59654	2.17666	1.69686
			5.87469	10.6106	26.875	2.58871	3.87678	1.35696	5.25624	2.53244			1.03165	4.89262	8.22879	5.07429	1.51619	1.0702	1.33542	1.92757
			6.81282	8.55412	33.6647	25.9555	6.36337	9.61448	2.47241	1.60468			4.21249	1.31756	16.1362	7.47501	3.18304	1.10892	2.44813	1.87223
			14.4428	5.14691	4.95542	3.64301	7.79456	23.1304	2.08314	1.8617			2.49355	11.8092	4.70186	8.93071	5.05492	4.85462	1.65484	1.54487
			1.86412	1.20419	20.2652	3.69931	2.95918	3.501	19.5899	2.48999			1.89934	28.7016	66.481	7.6928	1.47768	1.97192	2.21892	2.08658
			3.16746	8.28917	22.1401	5.46854	3.23479	6.39155	7.21313	1.87405			8.5073	16.9929	40.2399	29.5474	3.93519	3.2986	4.42972	1.64619
			2.70944	11.3676	69.6123	1.31004	11.393	7.1494	17.2385	2.63587			2.84006	4.81419	16.3009	15.6619	2.63309	1.83965	1.93607	2.51684
			46.3754	3.66866	9.35115	3.82556	4.98126	10.1277	18.1317	1.92036			1.78909	23.9223	2.14981	19.3271	2.20038	2.70466	1.23951	1.78494
			5.60286	3.90837	10.0368	3.94056	3.76653	21.7406	10.6787	1.54602			8.78938	29.7787	1.21464	6.82507	1.73878	1.09283	1.26308	1.07954
			1.05803	2.55979	5.97508	3.93172	13.7741	23.5135	16.9113	1.5491			2.80713	10.6154	8.38911	19.4745	1.15767	8.32773	2.01003	4.73827
			5.32716	2.4147	1.56341	1.61322	3.20454	4.48143	18.9976	1.39242			14.5769	14.5721	22.1228	18.1894	2.11372	1.90855	1.09564	1.79039
			6.45978	3.18922	15.6099	14.724	5.2004	2.78732	6.94695	2.14574			19.1423	11.6012	14.6089	21.5673	3.17624	2.76652	2.02223	2.60102
			2.74093	2.13152	6.75164	2.39731	1.21002	27.5318	24.7315	19.1982			9.86756	15.2199	1.12798	8.17532	4.67771	2.01014	2.85534	1.61814
			17.5307	4.51888	11.8736	1.43308	2.14577	1.30922	5.40038	1.9659			4.42082	9.24962	10.2385	6.48556	3.98616	2.42253	3.2471	1.28843
			5.64816	1.39905	6.52654	4.56221	1.04936	36.9094	14.2369	22.4439			10.678	10.9657	1.23414	20.341	2.99217	1.32417	1.73531	1.43029
			9.48304	2.45745	11.4362	8.05001	2.6681	30.1944	7.93591	5.74025			1.9781	2.51196	10.2255	20.4292	1.77106	7.75591	3.98755	2.29703
			4.90782	9.02094	11.0682	9.08019	2.92355	8.86678	4.29463	4.68822			1.3982	12.5882	1.68403	11.1046	3.31671	3.16181	1.73775	2.67974
			3.72493	2.58292	6.51009	27.3194	19.3314	16.5819	7.02586	9.39341			8.52377	10.318	1.93317	9.92297	2.29043	1.8819	1.26064	1.76779
			14.2047	4.09973	27.5184	4.69973	7.85842	3.03615	14.9449	2.24917			5.2248	1.90895	24.0704	2.72584	2.0854	1.82356	1.8239	2.14115
			12.2825	11.6775	3.56007	13.332	3.8398	43.255	17.3963	14.0623			8.81731	7.33312	3.70169	7.54197	2.146	1.06366	4.42809	2.52152
			1.49119	4.17543	10.1108	17.3224	4.52279	2.58324	6.74916	2.59882			10.3114	14.1109	37.6365	6.74215	1.67025	3.49776	1.40532	1.36715
			7.37913	7.48381	5.52126	19.2686	23.8717	17.1559	5.13841	7.76481			4.65637	4.72706	21.8989	8.13339	2.05029	1.46046	1.63046	1.56903
			6.43326	5.27518	22.6802	11.0762	10.7934	1.26089	3.2962	2.35028			7.2573	12.0526	12.4172	10.4193	1.60568	1.88391	1.11271	1.05615
			9.77641	7.04713	50.1827	3.8127	1.98309	2.92337	19.4374	3.56209			8.04124	9.70566	3.83746	2.43326	2.54077	1.208	1.39475	1.78182
			3.51056	2.88222	7.92908	8.87271	17.7544	4.19261	3.81172	1.70888			17.233	3.99566	15.9586	3.19052	1.90869	2.92192	1.02737	1.3804
			35.9249	27.4525	11.1129	35.5045	6.85141	3.88649	2.06525	2.71614			18.0391	12.0677	17.4224	9.96459	2.24059	2.11927	1.59307	1.20892
			2.20225	9.04547	5.66825	5.15088	8.39285	1.3313	3.24885	9.13407			10.2864	9.11136	15.9644	11.0723	1.46918	3.60286	1.42726	1.41236
			1.48179	10.905	2.93974	9.02711	6.0165	1.38322	3.62971	1.2805			8.70705	4.30878	1.96711	1.45226	2.20264	2.36821	1.99378	1.39911
			11.3985	8.43707	15.5215	7.55945	4.92345	1.55507	6.25888	1.37312			2.19001	5.04889	5.4175	11.384	1.2483	1.79137	1.99459	2.24559
			9.62392	1.07382	18.5414	8.37651	6.40236	1.82718	2.14311	4.40881			3.96549	2.01758	2.15703	10.1448	2.19641	4.33561	1.66947	2.02656
			9.84934	19.1304	9.33265	11.5378	4.82127	2.14046	1.83695	1.9798			10.4439	3.16493	22.7958	14.4759	1.17353	9.02024	2.27907	1.03277
			17.0064	8.20576	17.6328	25.1738	5.58828	2.94605	2.9953	2.33253			4.86898	6.57675	5.83706	12.2611	3.07033	2.55027	4.60934	1.63762
			6.05701	5.43009	9.13273	34.6239	2.71986	1.3671	2.52186	1.96899			15.4382	5.93772	15.2314	11.1953	2.72371	1.76321	5.12302	2.32276
			4.13598	7.45156	49.3429	8.33309	18.7069	4.79232	1.13205	1.67955			7.13846	16.0082	6.02049	1.3928	1.30493	2.96064	9.87948	3.70784
			4.30726	3.29927	56.0375	9.69138	19.6393	6.24118	2.90272	3.76277			10.5384	2.9494	8.13997	12.0239	7.6931	5.30371	7.35495	1.12942
			13.4632	1.3584	7.18746	11.1092	3.55679	17.9341	2.04737	5.94402			7.51218	8.61292	4.00644	4.41498	1.44936	6.26981	2.3449	2.6057
			3.41498	5.11747	9.69447	26.5385	9.66673	2.90965	1.65073	1.39473			16.7254	23.0793	31.741	5.48516	1.10274	4.31348	1.70767	5.52161
			7.72997	1.18737	9.05564	9.25068	31.0303	2.26518	6.64395	2.0153			11.3667	5.69663	18.5496	2.3544	2.51812	2.48942	3.16663	2.4233
			15.9826	3.11633	24.9708	17.7583	1.18515	8.02361	25.5069	2.44291			4.11011	1.26585	3.37745	2.15695	1.69857	3.80453	3.5901	3.30486
			4.77025	7.54199	10.8066	3.70815	13.1986	8.71223	7.49614	1.42329			23.256	13.2476	5.81251	1.20005	4.38433	7.24898	4.46791	3.48569
			8.13439	2.54787	3.9224	9.33673	12.2945	5.80915	3.78437	2.46452			18.0298	7.77522	3.52477	1.29173	2.355	10.0894	1.08508	1.71712
			12.824	1.32335	22.5044	44.616	5.17755	10.839	19.9392	3.30969			23.1257	7.06706	4.65781	1.97421	6.22902	3.04161	1.45246	3.74057
			1.42433	1.33597	11.2974	5.14365	16.2903	2.6077	9.62031	3.71723			10.4897	2.5898	7.60992	2.70518	5.36642	4.12841	1.68329	1.87301
			5.46307	1.15863	15.3108	18.5922	11.0986	28.3649	8.04533	2.17585			9.66782	2.1419	20.9096	1.49606	3.70467	8.05112	2.14414	1.56903
			4.2393	1.95629	6.34152	5.92774	11.9113	14.6902	7.16052	1.95124			23.3613	11.7412	5.46877	7.63522	2.79734	2.7464	6.74048	2.77328
			19.4655	1.59671	31.2193	1.29476	13.5744	34.9044	5.96009	1.87328			5.28208	7.72119	5.02177	4.69942	11.643	2.72226	7.89058	3.31344
			7.72776	5.29761	2.92278	21.2244	5.52913	8.44728	22.3348	5.77575			8.41209	10.6444	1.37279	1.58744	4.79608	5.93185	1.97752	1.81845
			22.3523	4.44108	21.1024	10.0991	18.633	34.8095	7.90435	1.23342			7.6439	5.39281	7.86556	1.58744	7.02591	1.00079	1.45815	4.97834
			13.5372	6.07494	3.37042	5.93015	27.1058	4.81142	7.14895	1.42329			2.61455	5.82618	4.83979	1.60027	1.8866	13.5228	1.58576	2.29547
			19.4937	9.40225	14.0049	7.68812	14.5209	14.1675	3.99689	2.31401			10.7947	9.3112	2.51233	1.15342	6.856	1.7969	8.55951	2.81303
			26.2347	1.85395	12.5895	4.66112	4.23037	18.3941	26.7031	1.72123			10.4482	4.91296	1.23414	1.29799	4.52819	6.98696	4.702	1.57371
			2.82988	5.97961	7.51125	1.62528	5.79063	3.75282	2.11891	3.51886			11.8056	5.77332	14.2334	1.48261	3.26856	4.57801	34.5493	1.81923
			1.24367	8.15389	19.5555	10.6339	3.40554	42.5467	1.50028	1.31755			16.26	7.13967	16.5897	1.59557	4.06432	18.0732	1.75725	1.73193
			4.88296	2.24858	15.2342	8.21487	4.3023	12.8255	1.61706	2.08863			9.87042	3.25207	43.2107	2.00487	2.70049	3.28352	3.3739	1.88315
			5.56087	18.3475	20.8562	12.4594	6.68268	8.88408	1.94111	1.86633			15.257	4.52605	14.185	3.48654	12.3731	4.03436	2.46926	2.95021
			16.745	6.92727	18.3282	11.3464	2.053	2.18283	1.54868	1.98597			7.92025	14.0005	26.3986	4.9363	1.70876	3.40472	3.14875	1.29233
			8.04544	8.09502	14.0414	1.31486	2.45433	13.6782	1.84431	2.93149			19.5719	15.5371	4.13715	7.90464	2.85624	22.5707	1.21512	2.05151
			8.8775	9.14851	2.52705	4.34025	30.3433	2.22102	1.78224	1.9003			12.2272	5.07271	2.70803	1.66911	1.30097	8.70642	3.75916	4.33763
			23.0026	12.6616	9.18104	13.6142	5.7671	1.90297	2.67967	3.28499			23.6691	1.04917	1.64071	21.9331	2.1613	2.04434	4.64836	1.58228
			13.1057	7.13755	6.61082	5.04714	17.5191	2.04081	2.53133	3.09975			1.26504	3.9974	9.83916	2.14256	6.27433	3.32878	4.49961	2.78964
			24.8286	7.94572	3.97585	3.21679	17.7147	1.38739	11.1532	1.06592			1.78623	17.8869	11.165	2.197	4.13342	13.0234	1.9637	2.45526
			6.6747	7.57002	1.42978	6.60166	2.72994	1.81883	2.24516	1.15855			6.33735	5.13952	7.95149	1.94197	10.4723	9.90134	4.22408	6.56841
			2.22324	5.39504	6.69254	2.55735	7.26147	9.76008	1.84116	1.9412			1.72108	9.60341	10.0334	1.34367	2.70445	11.137	4.93689	2.11075
			3.58106	1.3605	3.89876	11.5756	3.50637	1.25194	6.57977	1.05898			9.35353	1.82588	12.2013	1.30706	2.91345	1.70085	1.27608	1.58384
			2.26313	6.57821	6.83181	8.34193	1.33842	2.85295	18.1117	2.28545			18.5252	11.3863	2.417	6.63044	1.79202	2.29932	4.33462	3.95492
			9.5336	7.35834	3.24914	7.43641	1.56429	7.62439	2.75437	14.006			5.29782	3.42751	2.4134	3.80697	1.85828	3.13918	5.4709	1.08032
			9.73263	5.54364	11.3041	4.01374	2.50004	5.24643	8.40935	3.59219			12.1771	5.44393	3.55004	1.81243	11.464	14.6141	2.76755	1.42483
			3.0047	11.437	8.8624	3.64703	4.63707	2.40839	7.82124	12.4206			5.46821	2.62756	3.79196	4.19781	2.17432	14.1555	3.43973	3.03439
			2.26698	3.26632	11.003	3.42186	3.92585	4.11683	13.7908	8.63006			14.0142	1.51333	4.36534	1.52172	1.09537	1.82155	1.99459	1.83638
			9.45291	6.78218	6.84055	2.13353	3.56889	1.80988	23.2375	1.83855			7.75415	2.15643	2.76508	9.92172	5.4882	3.69439	2.03848	1.4373
			14.4779	2.51072	3.84222	5.73232	8.96155	3.2647	13.2868	9.84649			8.36627	8.32943	8.2844	1.16594	1.77219	1.28595	1.92469	1.44198
			14.8107	1.30863	5.79109	8.44005	1.84596	3.00572	16.0959	9.92445			15.5133	5.08956	2.02849	4.65279	1.88037	1.66464	1.26145	1.09591
			9.5897	1.93847	1.82397	9.11236	11.8885	3.32735	10.321	5.78965			8.59321	1.47441	2.29135	31.1076	3.844	4.95972	2.8025	1.10837
			4.26883	3.15122	11.0235	1.10175	4.37087	6.19046	5.10158	5.92626			17.185	19.1499	3.66342	31.8852	17.8454	2.42253	1.98159	2.78029
			3.70478	1.70541	5.28794	1.5143	1.39422	1.84508	7.41408	2.73235			20.232	9.02597	2.6156	5.72642	2.92194	1.46951	2.8976	3.28538
			9.91322	4.97396	1.25042	4.39172	10.2771	11.7878	10.0264	4.03292			10.7159	3.85914	9.3445	11.0116	1.33099	1.18989	2.82526	1.22841
			9.65732	1.66442	1.81781	3.89392	2.16661	5.71665	17.6257	2.08785			2.43915	17.4228	8.25335	15.651	1.91209	3.02703	3.01464	4.30801
			16.0917	20.5074	7.60838	2.65385	10.3255	2.58562	22.097	2.14266			6.14763	1.89094	2.88134	1.50952	2.30855	1.00482	3.30481	2.05385
			8.0105	7.23953	24.3037	4.19871	2.78238	4.15203	3.73176	1.97439			1.61298	2.21626	2.25669	20.4095	2.13468	1.11999	4.22489	2.10841
			2.02414	12.2071	28.1444	1.4572	3.9077	18.1369	21.0691	1.82311			8.21736	3.68544	15.4632	10.5992	1.47088	1.53489	2.17097	3.94868
			2.33691	1.82274	7.57292	7.90686	2.20157	1.28834	7.27625	6.60549			10.3816	2.51138	1.25869	9.68922	2.82113	2.14643	3.0309	4.98535
			1.93577	9.61761	9.14609	10.5028	14.6991	4.70699	5.6392	7.45067			1.04596	3.91898	1.39445	17.1486	1.36214	3.4007	2.06855	2.94242
			1.39554	9.32587	9.12142	9.97365	1.13876	4.59898	3.08473	2.64436			3.65694	2.60374	1.79019	4.05418	1.85545	1.7099	2.99432	4.5169
			2.16708	9.80406	19.2784	16.6018	2.46172	2.69721	2.53238	17.8321			5.34937	3.02608	2.0025	10.4593	2.3397	2.63073	1.92063	6.60427
			2.705	3.91471	20.3521	5.1163	8.91853	1.15348	8.68816	3.42007			5.66939	1.52611	6.59242	6.44269	1.15824	11.7536	1.8621	1.75922
			10.09	7.53689	10.0208	8.60169	4.74597	1.21911	7.58031	2.14574			2.11197	1.12469	1.66526	3.60608	3.82814	2.47332	2.94962	3.31811
			22.254	10.7781	60.4903	9.77421	7.75691	5.69458	2.80382	6.3778			4.45662	1.72537	1.07238	11.2954	1.20695	1.5364	1.71661	2.79588
			1.53924	7.35365	16.9076	19.4342	3.31546	44.5153	6.30096	1.72045			6.02949	1.89733	3.0236	8.89096	1.65382	1.22057	2.58224	7.34786
			11.6415	1.5736	2.57382	1.55934	27.1684	3.02123	1.7875	2.73003			5.11312	1.4808	4.25979	5.3844	3.07826	6.8386	1.38256	1.79039
			23.9716	9.31301	59.463	2.8927	3.39546	31.1397	1.15414	3.20163			12.6668	14.6238	9.05862	5.37814	1.34684	3.76279	1.83366	3.24173
			5.25631	3.99669	15.1345	13.882	1.53068	21.3372	1.60338	3.8469			12.732	26.0049	2.8672	2.41699	3.51324	2.50903	2.783	1.8699
			3.92379	8.21599	13.8749	11.7517	4.5275	4.67178	2.22517	1.20872			18.7693	5.56069	9.25554	6.45426	2.95252	5.74477	2.66189	1.191
			4.5401	14.6671	35.374	8.73921	2.77834	3.17579	1.03631	2.52549			15.5105	14.1504	13.5409	17.8667	1.29361	3.09291	1.56544	1.48329
			10.7055	8.94011	11.0518	4.20917	8.70342	3.46162	1.67703	3.24331			8.60395	10.5259	7.37903	1.12338	3.23345	2.02623	2.01897	1.78805
			3.63485	3.25248	12.8768	13.4615	1.93805	5.9816	3.43087	3.44862			1.87643	1.82936	15.0121	12.1951	1.69403	1.18436	3.04309	2.73976
			4.66305	2.00759	11.8561	21.7881	1.05272	34.2408	1.6118	1.12073			2.17712	9.19444	10.8182	18.6856	4.57123	1.06416	2.08725	2.7156
			11.7837	1.94088	5.99975	55.9415	1.73436	5.7805	1.82011	1.81616			12.1871	1.79973	3.60046	16.3206	3.76075	1.87234	2.24818	1.03589
			20.3882	30.387	34.6638	13.2427	10.0647	1.24119	23.4837	9.57943			2.30956	6.92531	29.2379	2.12253	3.63614	1.10088	1.62558	3.21912
			25.9058	6.06294	1.12142	77.6903	6.32707	1.91132	6.80912	4.1595			13.304	1.86538	15.5901	6.16888	9.36788	1.45694	2.13195	1.40535
			8.73363	21.3039	29.4015	8.54138	27.1932	7.69063	10.3936	2.44136			2.70547	18.0287	13.3285	14.3098	2.92137	1.18034	2.20835	2.12478
			3.88998	2.42228	1.8507	4.70133	9.14776	2.32187	5.34251	5.65457			6.01232	4.87229	7.37903	20.0334	1.20469	2.21684	2.49283	2.78341
			6.53658	7.77638	10.8143	10.1063	8.40629	5.93207	5.09422	1.98751			8.48727	11.9149	5.50117	1.80836	3.49568	2.46779	1.82472	4.19343
			8.63834	21.811	3.29385	4.85815	4.44279	1.44229	5.39617	2.96082			3.15579	10.0542	5.3775	9.23768	2.4796	4.01022	2.65783	1.5511
			1.76747	8.10911	10.93	1.51672	1.57841	39.1997	3.20361	1.12459			4.47094	13.1494	22.6909	2.07935	9.89291	2.48841	2.48551	1.46614
			6.84934	17.6255	7.61712	12.5012	5.37451	5.35683	6.99429	4.78933			4.33777	8.7994	6.88907	3.30568	1.93701	1.99807	1.96858	3.26355
			9.63043	5.25042	20.5021	4.35231	5.0673	12.1715	10.2947	1.01884			1.49843	6.10852	20.9905	7.94532	9.30048	1.75516	5.60257	2.11542
			5.52528	8.55274	16.8146	8.27277	12.3005	5.6892	6.91223	2.49385			1.63087	8.6623	6.12085	14.3154	3.18757	3.89204	2.09538	2.25572
			15.918	4.98923	15.0035	8.16984	14.5391	1.60758	12.2295	1.21335			6.32446	8.63732	7.10548	1.51015	7.24963	1.1577	2.15796	1.05771
			8.2833	4.1084	20.1717	47.7194	31.3322	3.61916	4.76807	2.33639			2.91667	11.6367	29.8098	1.73138	34.6538	1.84619	2.55217	1.23776
			4.62617	12.8484	1.54233	19.669	11.2747	7.38152	17.1901	1.46729			3.71277	11.4938	3.708	5.72955	2.31365	1.37748	3.38853	1.64074
			21.1105	10.5627	2.49775	15.6448	10.0015	6.22089	4.49979	1.83469			5.89491	5.19297	9.26562	10.5923	8.89099	1.23566	1.91087	1.22919
			1.23877	19.8974	1.03559	2.52437	23.1988	6.37305	5.77177	1.31446			5.37371	6.30952	6.61417	1.10773	16.9607	3.04463	4.4354	2.49891
			2.39147	12.4329	5.7695	18.6027	1.81705	2.23296	3.40141	1.16395			7.60238	12.4697	2.92701	10.2863	8.99011	3.90159	4.35575	2.53788
			1.31562	13.644	14.5209	17.5058	4.38095	4.75771	8.4083	2.11873			1.85209	7.17627	8.09549	3.12074	2.89079	2.86107	2.60906	2.53009
			45.0475	22.2233	6.79995	7.13323	2.33938	4.73384	6.01374	4.63727			3.66767	8.74596	19.2329	5.91604	1.81241	14.6282	1.68329	1.86756
			19.3584	14.9372	19.4157	24.6953	9.42876	45.6706	3.79173	3.16458			2.96535	7.18208	8.71047	2.6717	9.16852	2.32396	2.91061	1.43964
			4.98658	2.23985	1.47912	5.7283	6.46488	3.84472	2.35984	2.27464			7.89304	6.3711	14.1243	7.02847	2.34707	4.07912	2.00353	1.57916
			5.59828	28.455	8.65785	5.41948	10.8996	5.65698	2.3146	9.43741			1.66237	5.53107	6.11682	8.52954	2.51868	2.28775	1.52155	1.13254
			1.61071	10.1665	7.45831	23.2429	2.2614	10.9685	3.23097	13.0705			11.9702	2.45619	17.6918	2.27993	12.8534	1.1567	1.35899	1.93069
			26.622	12.0536	20.5612	13.1502	5.89953	11.2286	2.89219	3.25798			2.64033	6.93751	2.68304	1.69227	3.47642	1.64654	2.19535	2.4272
			18.102	10.1641	2.85597	8.22935	19.0666	3.03615	7.53928	6.86792			4.96277	5.33588	24.5352	8.98234	7.80638	3.61594	3.49988	1.89718
			17.0769	6.43183	17.4334	4.94822	23.8999	2.44817	4.03792	13.3368			1.4118	6.07889	7.28023	5.09807	3.18644	1.06265	2.26281	1.92602
			2.58282	1.18944	1.61634	20.9324	5.93852	21.307	4.36933	10.8128			3.26962	13.4945	16.5324	1.45883	2.15223	2.66292	3.70552	1.05693
			39.1872	31.6512	13.0783	3.07525	7.20837	15.2033	2.16204	5.65149			16.9044	4.05898	3.76177	8.80241	5.0351	1.209	1.18586	3.04375
			16.8333	4.40978	3.06309	3.70252	6.02389	5.25718	2.97952	6.79228			2.95461	7.21636	7.70298	1.30769	1.1792	14.5367	1.30859	1.88393
			5.01808	8.4571	20.314	4.93214	1.80024	29.363	2.12943	2.29394			1.25	13.5764	9.27638	6.09503	2.36179	1.34026	2.25387	1.73505
			12.184	7.66387	19.2198	5.20557	8.14278	4.73058	4.16102	13.725			2.36398	9.73935	4.43925	16.2746	1.6221	1.14714	3.00083	1.9229
			2.21088	18.2266	13.474	17.2251	11.0428	2.14939	14.1043	6.94202			8.80513	1.38378	47.134	3.35261	3.70581	1.31763	1.65484	1.12786
			22.7266	18.4886	10.2033	4.27833	4.11676	14.9782	5.20364	6.01734			11.3001	7.36507	5.72364	15.6231	2.33687	5.12568	2.72285	1.61814
			20.7932	10.7894	10.9192	11.9817	4.73522	3.17668	13.8676	6.01426			5.63073	9.01028	3.94323	13.7565	1.97213	5.14479	1.3216	1.40067
			3.28212	5.97373	17.0032	13.9842	21.6486	5.55663	20.2306	6.02043			8.08634	12.2623	24.7341	20.56	9.56895	4.20435	1.10458	1.43652
			6.5289	16.1595	7.13812	9.73078	3.58435	31.8228	13.5825	6.02583			1.84708	4.65212	9.57816	7.0316	5.63376	25.387	3.06991	3.6447
			7.17671	10.005	15.1751	11.0939	9.73126	3.0423	14.9502	2.42361			2.39977	10.1617	1.96389	2.73147	2.30402	3.15829	1.37118	1.58072
			3.47193	6.64722	22.5322	3.77651	2.69902	1.80287	9.44987	1.95896			15.1897	3.48444	4.14688	1.07644	1.54111	5.01202	2.71066	1.54175
			8.65908	9.73736	5.3491	7.50235	16.545	2.25922	8.73445	3.91868			5.98082	6.18752	3.91836	15.6193	2.7996	10.0794	2.19616	1.77247
			11.63	22.6259	29.715	9.42197	31.7866	4.55322	6.32411	2.13494			2.43772	8.94637	32.1158	1.82275	2.20264	4.93307	1.87186	2.02968
			6.03554	4.65972	4.99345	13.18	16.0106	6.558	4.10841	3.29811			1.00516	1.24668	9.74349	5.36124	1.85998	2.58949	1.90925	5.28778
			5.94255	8.33414	5.89387	23.3676	1.23355	1.95089	6.03373	13.1083			2.05685	4.77876	15.533	5.69732	5.80424	4.05649	1.84585	2.34692
			3.43889	6.31128	5.49557	12.8133	2.54306	4.86018	5.44772	2.91065			1.63588	1.76952	1.49812	10.8417	1.04553	2.26813	2.11813	3.2425
			3.56799	2.83296	14.2922	4.66595	4.8858	1.38404	4.43035	3.03877			2.39906	8.26668	21.1847	10.4096	5.98304	1.73153	1.67841	4.07652
			3.84694	12.1211	10.047	5.89878	2.62306	14.0014	10.2105	2.59033			5.48181	5.24235	4.13277	7.73285	4.07022	16.2184	2.0336	4.52002
			8.37014	11.7827	27.6115	16.8865	12.4189	13.468	6.80597	2.79101			10.0916	11.1737	13.6363	10.1473	4.45084	10.5536	1.76132	3.24484
			11.2104	4.25467	2.64474	6.24056	8.43923	2.57777	3.00477	2.58107			1.34021	6.74987	10.4694	11.1856	5.6067	2.65135	5.65947	10.5849
			6.83936	14.4316	20.6928	8.65959	6.09515	5.07641	6.67867	16.6812			8.75215	6.10038	9.29654	1.00291	4.15501	2.99183	1.76619	1.98915
			1.68986	4.95146	20.3336	8.00336	12.0404	11.7306	2.82591	2.02611			11.1555	1.32511	16.3846	7.08761	2.74418	6.93315	2.84233	1.56903
			3.74551	4.66374	7.90287	6.71826	4.68346	3.24967	2.25673	2.51855			8.5653	18.9669	4.61735	4.04855	1.68713	13.8919	2.88053	3.93466
			1.99955	8.66847	7.82989	15.4414	1.82108	5.56482	2.20728	1.05589			4.70074	5.66933	4.42581	1.73107	7.52988	3.15929	1.84179	3.8115
			3.52419	9.7896	38.7933	6.27515	6.76402	6.73399	1.88745	6.39323			1.85639	2.8611	1.36034	1.94385	4.03363	11.9472	2.40749	2.8029
			6.96308	11.139	22.1894	3.56179	11.1154	1.75785	4.16312	1.8509			7.30599	1.5389	3.24223	5.98457	1.77985	4.01425	1.94013	3.14819
			31.6086	3.69531	5.98587	2.99644	3.4573	3.15417	7.52034	2.24531			4.24828	2.33245	1.80662	2.20264	1.12415	39.5354	2.43025	8.93716
			5.89414	1.79542	1.18874	7.52487	2.35148	2.02525	2.36194	10.9001			3.77935	8.42121	7.12766	11.2019	17.8284	3.73563	1.919	1.55422
			10.1161	1.95133	23.777	10.5905	2.39988	1.66235	1.52343	11.7614			6.61226	2.03152	9.71459	31.8799	4.37032	13.388	2.1604	2.54178
			3.88921	3.22998	1.00835	10.5623	2.34811	2.07641	2.23779	2.67832			12.2638	2.30398	7.75541	15.4009	3.10284	6.57457	1.25576	1.14657
			2.91326	5.37901	39.1849	1.67836	1.52463	1.36085	4.72599	3.69793			3.70847	1.52321	1.84829	10.6759	1.15525	5.13423	2.64726	1.3274
			1.76517	4.49256	8.57407	3.65347	13.4037	3.73808	2.51239	2.91991			13.8202	1.21357	9.81608	2.00831	6.73328	6.01433	2.17503	2.64077
			2.69501	28.1673	9.70937	2.27025	1.82176	2.87723	9.3373	1.3353			15.0623	4.45576	1.65136	1.31489	1.38887	2.68404	1.75319	1.73739
			6.50046	8.88064	2.24592	2.50346	3.7383	10.6378	13.4162	8.73117			7.56372	12.2182	4.28466	7.48346	1.52123	4.62931	1.6329	1.2931
			14.6808	4.8727	3.23577	3.86336	5.91297	9.55665	5.81385	2.32944			20.7159	12.5505	2.44848	5.6679	4.12024	5.92079	1.41913	1.71011
			4.56316	8.7641	3.78106	5.51116	22.1696	7.04777	15.5562	2.57258			14.8819	2.8489	5.41985	2.53589	4.81864	2.27719	2.3002	2.97983
			8.30251	12.7801	14.1478	6.30089	6.33043	4.54504	7.18367	1.27896			7.70404	8.5862	14.4926	1.3975	3.50053	2.10268	1.10702	1.77714
			40.031	9.14585	19.4568	2.80102	10.0593	9.63918	7.06057	2.21212			3.92612	11.4543	7.15253	12.5843	2.77285	1.74913	3.3739	1.47472
			13.2038	19.2031	23.9137	8.84375	11.9644	14.2565	7.87173	1.35074			16.328	16.064	10.5507	3.38484	15.81	7.42349	1.66297	1.22062
			8.67676	15.8083	25.2658	4.4456	6.21749	2.74216	17.2932	1.23573			2.5945	12.7224	9.80129	6.54595	3.06746	1.49616	3.06829	1.50511
			9.94012	8.53827	29.6965	4.10623	5.41686	20.1406	6.35147	2.57026			14.9485	11.2207	6.40246	12.2861	4.08242	10.7865	2.22461	2.61739
			8.36476	4.9836	4.64191	19.2983	31.9231	2.07572	4.41878	1.48504			4.07431	9.7469	4.43723	28.751	7.56526	2.65688	1.90437	2.12945
			10.1714	7.85916	7.95632	9.63267	2.02141	8.10849	9.42146	1.32449			4.54897	10.8995	23.6406	2.49271	3.50419	1.28846	2.67002	1.12007
			43.7227	8.05848	7.5169	2.35228	3.19782	7.5048	5.8391	1.71351			11.051	13.4951	3.98894	16.7465	2.23975	2.97825	3.87864	3.80137
			11.2427	34.9479	68.3218	6.1891	8.14546	1.76058	8.66606	1.09989			17.6325	43.2186	6.10405	1.66973	1.55233	1.94325	3.23572	1.07408
			2.97704	7.34159	3.08981	16.0928	12.5452	1.34721	12.7345	1.24654			17.558	4.19666	2.64607	11.005	3.52919	7.10263	1.40532	1.37339
			33.4145	13.6352	11.0487	19.7672	12.6407	8.4284	5.38354	1.67183			25.0738	19.8755	2.66288	8.89597	5.94339	2.63526	2.82933	2.01877
			3.74013	9.03173	2.25003	26.4621	2.60222	5.23672	5.30043	1.5877			4.55828	6.56862	13.5053	7.32887	2.0708	2.91689	7.65975	1.4677
			10.1737	2.48899	9.20622	23.3402	3.49898	4.75922	5.50769	3.15069			3.58104	1.33847	8.11095	2.77715	5.56644	27.0974	2.60662	1.39677
			3.72476	5.36857	17.4586	18.1556	4.0771	5.37451	1.04683	1.62011			1.53995	16.2749	3.59575	7.33138	1.4828	1.5369	4.11272	2.05463
			9.54973	6.92127	1.70731	5.64225	4.58531	3.02116	1.62864	10.1931			12.1735	2.69379	19.7457	8.59682	1.20466	1.52785	3.50313	1.37651
			6.64263	3.2999	17.3409	7.90043	8.74711	4.50956	2.5671	2.78406			12.9331	4.84324	7.62973	12.068	13.5575	1.22861	2.81145	2.13647
			11.5485	6.48166	2.04703	39.9927	5.42897	11.247	2.43138	6.34924			18.1572	9.68126	3.87401	11.0504	1.77314	4.76157	3.58116	2.25884
			5.25478	7.92105	1.98638	4.04109	4.76076	12.9407	1.36982	6.59083			9.54683	4.91179	21.6633	5.63974	4.75337	2.75596	1.78083	2.30873
			9.66808	7.0362	6.62727	12.0742	8.51923	19.3786	3.07316	1.65793			9.03065	10.3429	7.38978	4.96164	6.06782	6.42018	2.94393	1.19879
			19.3869	14.9781	46.4741	25.4649	7.6991	11.03	2.05263	4.16567			11.5335	8.62977	7.25805	9.39508	5.9007	6.83408	3.19833	1.73115
			23.2884	7.23712	5.89388	16.9653	13.3909	9.66442	5.42773	2.51932			20.0652	31.2141	1.27901	21.2951	2.93083	1.57814	1.75238	1.0164
			9.22621	3.09737	5.23089	1.00605	5.68038	27.5574	7.93802	2.60808			9.60052	6.30836	1.09688	4.12114	5.3005	1.45643	2.9545	1.13722
			14.5156	13.2623	6.57741	31.0243	9.24188	3.00888	3.73071	10.2942			5.2026	7.38308	7.87437	16.0512	4.20075	2.36419	13.7126	1.74129
			8.76897	13.8892	12.6327	4.24214	4.7816	1.15348	8.94802	6.88876			8.45647	12.6173	3.95802	3.19709	9.16517	4.47139	1.65728	1.03199
			9.0779	14.6446	14.7686	16.6782	2.98203	7.81449	12.7808	4.80014			11.0631	8.0285	22.6143	6.85355	8.39785	1.72298	2.67327	2.24403
			5.73968	9.37811	16.1377	28.9157	15.8372	8.40385	8.15159	3.37916			6.94803	9.21303	9.21925	7.40429	4.51122	2.27015	1.79058	1.1871
			10.7509	5.64101	15.0343	18.326	5.35972	10.232	7.15526	3.34288			6.52921	9.20605	1.94305	16.3998	13.294	14.672	3.04553	1.26972
			5.98943	13.6087	5.99563	2.14318	1.2396	5.76332	11.5341	4.46901			15.7646	6.92531	13.8151	7.04881	3.6091	1.80043	1.64428	1.19178
			1.67602	3.86328	9.03611	21.1359	5.07402	5.40247	3.85065	4.51687			16.5858	7.04266	12.1335	16.9543	4.87597	1.96538	3.89327	2.06866
			6.92312	3.52171	1.13581	2.96588	1.55017	8.66715	4.89853	1.73821			22.606	6.58953	10.5083	20.3379	15.4074	1.5022	3.825	1.30168
			2.52826	4.28119	13.0392	11.9359	1.24431	6.38611	14.0075	2.36881			2.89376	23.2588	4.15293	6.33035	4.31909	4.23804	4.12979	2.25572
			12.0403	10.4912	6.29218	17.1793	20.3156	10.4775	2.52922	8.26497			10.0773	14.4403	3.19182	5.09839	2.02261	1.20598	2.83908	1.47628
			2.17937	19.1484	14.8411	2.98196	3.75443	7.2033	7.15105	5.06874			5.15751	4.00844	1.04176	7.60142	10.7102	3.47613	2.28557	1.20503
			8.15497	2.13457	3.79751	7.80232	11.0341	7.15214	9.19842	5.77035			2.04897	5.771	2.01161	6.48712	3.5542	5.84887	5.87404	2.0975
			3.02622	3.82149	51.6243	13.9713	2.37635	6.99252	9.06165	8.08744			8.61398	7.79787	1.06797	1.94573	3.78599	1.58216	6.14227	1.49031
			1.65528	4.50541	21.6585	2.08689	3.07211	1.79946	21.7867	2.65439			6.6903	5.89357	14.6223	6.84354	2.06104	2.91488	2.0458	2.80523
			7.09064	6.13126	2.12977	6.83246	7.3287	1.20123	2.06525	5.47164			4.27835	2.44805	22.1304	9.31247	2.05311	2.21784	2.59606	3.74447
			2.5344	2.96959	4.43891	17.2589	1.76596	2.50274	10.0106	5.19609			5.61069	2.25344	4.06018	7.25408	1.18209	2.16001	1.26308	2.10841
			30.0401	9.52679	9.20931	6.87991	21.7838	7.89839	2.22412	10.0047			11.512	11.2411	6.42666	17.2115	1.56697	1.67319	1.79546	1.57137
			4.6523	2.57659	21.8194	8.31218	10.9742	11.6958	3.91377	15.2656			8.36913	1.06601	5.10799	9.75618	15.7862	5.92632	3.48362	2.82706
			14.6616	12.0809	4.8701	2.49382	5.96877	10.3636	9.97381	1.42869			9.57259	7.38192	32.5191	12.4482	20.8488	11.4061	5.96751	3.56052
			5.70356	4.9595	3.63151	2.88385	5.50896	2.46522	4.77649	16.7901			1.85567	4.67536	1.87383	7.55449	4.90586	1.98499	4.51749	3.29005
			2.00032	11.3769	5.27252	2.80504	7.04905	6.852	6.97851	3.20472			1.34808	10.5004	7.4422	5.10934	9.29631	1.77427	2.51884	2.65324
			14.4894	2.26396	6.6504	1.81829	1.5979	30.9332	3.51293	3.32436			9.73869	13.2313	17.7899	5.88726	17.1812	2.56988	1.56381	2.88552
			3.23064	16.2455	26.0784	5.40742	16.0476	3.0996	1.35088	4.18729			7.33248	4.98732	7.06247	1.82244	6.5814	8.52788	4.16312	1.89328
			5.45842	10.5852	1.39638	4.12794	4.77152	9.0048	16.9807	5.75646			4.88832	13.796	12.5663	1.82713	1.18758	8.24826	2.46276	1.71011
			15.3086	1.60816	19.4357	43.8907	6.26539	4.1037	3.55291	1.70425			17.7492	2.9221	17.8672	12.0906	1.51391	5.27102	2.17178	1.99071
			1.00746	4.29325	1.94681	2.8742	35.5377	5.43453	8.44723	6.03432			2.2258	1.6208	1.99682	1.7924	10.3332	2.00209	4.01356	3.0796
			1.9519	5.3324	1.50842	1.71294	3.61942	29.4708	4.87538	5.643			1.29009	1.86131	11.2349	10.2299	4.67408	2.417	1.03956	1.4677
			1.30255	8.41049	9.14969	8.42155	3.75434	3.98774	3.03843	9.49839			5.68801	4.54813	20.6585	7.37957	5.37065	2.95209	2.57899	4.11393
			12.5706	4.63722	7.96814	7.20561	5.71754	7.58461	4.94482	1.63941			4.88903	2.9767	11.9964	11.0313	13.7459	1.63849	1.17205	4.39531
			3.02007	17.779	6.12001	4.15046	3.47091	12.8411	2.45242	2.27773			2.5809	10.415	1.62582	10.4443	1.86097	2.23092	1.63859	3.46231
			4.20812	20.8072	9.67134	4.45847	6.22011	14.6065	1.22253	1.48041			8.83735	3.47805	1.40738	14.8208	46.0302	2.4864	1.88811	2.39446
			2.44372	1.97142	3.28871	2.18018	5.39698	5.84177	1.74962	1.64636			8.8667	1.92057	2.00489	5.83688	4.18429	1.34378	3.09917	1.48563
			19.393	12.9826	5.94013	3.63899	15.2329	5.42976	2.28935	1.03428			9.31916	1.0329	12.2222	1.68945	4.04034	1.32719	2.69196	1.14657
			9.45752	17.5121	7.59605	4.34186	3.92006	24.6154	7.18998	1.03582			15.3487	1.42968	11.3485	4.64028	4.27578	1.95231	1.64103	5.01419
			14.7392	19.4546	15.8849	3.61647	7.83196	2.19987	8.02534	2.6706			3.72137	8.89293	27.9071	3.16893	7.8983	1.59775	2.22299	2.10295
			4.4525	11.9539	4.29449	2.91843	3.18476	5.67396	25.2502	1.13771			2.54654	2.90176	3.10512	5.92418	7.69396	3.20456	1.78164	2.42175
			9.2385	7.74504	6.72646	12.4466	9.44834	12.4352	3.93797	1.01035			11.666	5.55779	6.59939	6.11788	5.09739	1.63899	1.73612	1.56825
			12.5368	25.0675	28.9975	11.7413	7.88539	32.3596	20.6767	2.08785			15.446	3.67731	3.08429	1.82463	2.59719	4.89635	1.84666	3.83567
			16.6327	8.34217	11.2343	10.7819	14.1336	14.9823	5.19417	6.69811			17.1778	4.6771	3.80478	11.333	1.56331	3.41628	1.05988	1.54019
			3.00778	3.44537	3.96245	2.61847	9.46645	6.07505	16.1738	3.64004			5.72237	1.57433	8.68761	3.36513	4.65151	1.58317	1.86942	1.65321
			5.38234	9.97525	9.24678	3.71861	4.93607	4.66304	3.32566	3.02951			1.14906	4.97105	3.83637	18.6215	19.3807	1.26533	3.51614	4.47559
			3.568	45.9077	7.07009	18.24	3.74257	8.93182	3.30356	4.74919			2.90521	6.54596	2.93777	8.61966	2.57279	2.07451	1.44189	2.17232
			16.4337	11.7417	6.70076	6.48907	27.5156	9.93318	6.0148	22.5203			10.451	5.80527	5.1631	13.1216	13.4702	1.42576	2.04336	1.89562
			13.2046	7.18166	1.28634	8.92739	13.7288	8.13713	2.01265	3.80754			6.41753	10.8722	2.08016	2.92141	13.0756	1.43079	1.02981	2.64545
			3.88614	13.3049	7.70851	3.57546	4.79661	13.6522	5.69391	4.52227			7.01031	10.6688	2.31607	1.18815	10.5302	1.67017	2.29451	6.22935
			2.58512	14.8375	11.1912	25.2421	8.23674	16.1535	11.4846	3.03492			6.33162	9.3205	12.3862	7.60956	3.56884	1.54947	1.73856	1.6688
			2.89942	32.7515	20.9552	19.3425	5.92672	1.32265	3.31303	3.94956			7.55943	6.95261	6.54226	7.14863	3.09796	3.94484	2.13358	1.51681
			3.82389	8.46835	14.6986	8.04197	6.43835	2.23057	12.9133	2.85739			2.85295	13.5973	2.91693	16.9223	1.74691	2.07049	1.80765	2.60725
			4.86516	8.96583	46.3113	3.74193	6.36047	2.03957	10.16	9.44513			3.35911	3.26717	5.45009	1.87251	1.06193	2.25053	2.11326	2.86135
			5.74198	41.3854	2.63804	8.52368	6.49721	5.31039	4.9585	6.87873			1.11755	10.4713	1.89869	4.96008	4.76374	1.01135	3.19102	1.24634
			1.68448	32.1961	8.85142	13.0489	1.34925	3.882	2.95111	1.49893			4.97208	12.6568	11.9272	1.66129	4.3386	1.07422	1.23382	1.18009
			13.764	5.51243	1.76546	9.2547	5.50293	4.14394	2.2136	5.95714			8.96478	8.82206	14.5558	1.09835	7.74337	1.76623	1.75969	1.59475
			2.93708	5.92471	2.48256	12.1498	25.4663	6.30766	3.33512	2.19051			3.56888	24.8012	1.00278	21.71	1.72434	1.01538	1.36386	1.25725
			11.3887	2.68268	12.0765	8.96519	25.6176	7.08597	9.07322	5.77189			6.09178	5.85	7.88042	7.6299	6.09954	2.49947	1.5882	1.38742
			17.3996	18.4058	25.4951	57.0554	7.79212	4.95022	3.78016	8.76822			5.28422	6.81203	1.45578	3.37921	5.70856	1.5022	1.80114	1.4373
			5.90567	5.28659	5.4709	15.8427	3.42292	2.47204	2.0884	5.97103			2.01604	12.9356	1.1493	4.85525	7.88854	1.36239	2.33515	1.01796
			6.5604	3.44697	2.16399	10.5044	2.59164	11.8698	5.94431	9.64812			6.14333	12.2211	2.76839	5.62221	11.7483	1.88693	3.47143	1.26816
			11.424	7.91622	6.23306	7.96075	4.36015	3.94612	8.63766	3.18002			1.04883	15.0799	1.28843	5.93951	5.35052	1.81803	3.61936	4.11159
			5.50146	7.1889	4.41429	1.63252	19.7941	3.02798	1.64442	5.14824			5.92927	14.6895	2.21861	3.95842	13.5819	2.13939	2.60906	1.40145
			6.04553	2.98245	4.11666	7.73557	9.30527	30.2729	1.76962	1.62166			6.91653	12.1514	6.27006	1.33241	2.04823	1.77478	2.29613	1.13254
			4.05443	3.81988	5.72474	31.2294	3.09783	4.04367	1.83379	1.20023			2.56372	6.17707	7.76482	2.22266	2.31234	1.67671	1.96695	1.502
			1.25721	13.4254	14.0399	5.87305	4.02872	26.7552	2.4398	3.64004			4.93485	9.39486	1.19836	1.27546	9.68302	1.48761	2.38067	1.01484
			13.4243	6.68258	8.4421	2.13997	15.4502	4.82812	21.3637	6.12772			6.2185	14.9765	17.8591	3.27157	3.98666	1.28243	1.94176	1.77714
			2.39992	8.04883	9.98926	3.29882	4.24243	6.77628	2.29566	2.87128			8.62471	3.32352	4.76791	3.89835	9.59763	1.44436	1.91087	1.18632
			2.70731	2.82171	1.73056	27.4545	2.07911	3.59073	19.9981	2.41743			3.02048	10.4957	2.35236	1.78896	2.02078	2.11525	1.52155	1.54331
			3.09077	2.99531	13.9593	27.8477	2.41596	2.40587	11.4183	7.67991			11.8292	4.7927	3.50032	2.81314	2.38919	15.2558	2.27663	2.17388
			4.82751	4.47327	5.25132	14.979	19.4047	2.49796	4.98059	1.37081			6.85925	19.8296	4.94601	6.2493	19.7345	1.49817	1.71824	8.34321
			7.27431	5.89578	16.3727	23.6136	38.8121	13.2272	5.16366	2.18279			1.16123	10.7025	3.03253	4.19562	1.08938	6.1828	2.6115	3.73979
			3.19067	9.44803	12.4877	7.04477	39.8489	5.86155	4.49768	1.23727			4.97566	4.67826	2.98078	1.28422	6.19957	4.10477	1.73694	8.40713
			2.54362	6.28395	5.36492	1.3607	8.37619	2.06481	5.1079	6.2898			1.9065	1.84272	1.44973	2.79969	2.09336	6.29244	1.72474	3.59637
			1.20726	2.23021	6.86956	2.19224	3.36859	2.03002	7.96853	2.08091			1.07532	3.7871	1.60969	1.97201	1.29188	5.02057	3.14957	2.38277
			4.35874	5.42241	10.2672	1.04224	3.71541	1.79264	7.79914	6.71046			2.20218	3.22128	2.59096	2.04242	4.45999	5.85339	1.15904	2.7156
			4.53549	7.20336	14.0678	2.03542	1.58831	3.19919	5.12262	2.75705			5.28351	5.35272	2.37186	1.46602	8.50032	3.72356	2.42537	2.79198
			5.30242	2.71884	9.56535	11.2387	1.86359	1.36904	4.49874	2.62429			7.76776	5.85697	7.39382	1.57836	3.20409	3.38208	1.3728	3.91751
			5.1226	3.04273	22.9669	13.6705	3.09874	2.15894	6.98798	11.3408			6.50487	2.89421	1.38655	1.34086	1.19856	2.32748	2.07668	1.81378
			8.96493	26.5696	5.64414	4.18585	9.56968	3.53412	3.41824	2.77557			4.3657	4.00089	24.0008	1.52861	1.13024	23.4865	3.14306	1.77247
			12.9733	5.21426	3.37862	11.0698	13.6029	1.42906	3.3709	1.00804			10.9099	6.02603	24.7771	4.79392	1.18819	13.298	1.76213	2.36718
			2.92786	17.7163	5.49756	13.1969	5.56722	1.1528	3.64549	1.57612			1.16624	7.23552	3.65826	1.98891	15.9216	11.9085	1.01518	2.17544
			17.1261	9.84023	1.94759	12.0573	7.43987	2.00478	4.72283	2.50157			9.52248	2.12796	1.47191	9.86383	22.4152	7.50848	1.77107	1.19567
			7.11677	11.925	1.5002	56.4747	10.0288	4.10029	7.16578	3.38147			4.60195	5.36957	8.6036	1.49794	7.61528	2.46578	4.36713	2.49501
			5.30319	13.4777	5.26656	13.5113	1.6363	1.95226	2.18519	2.87205			7.14133	12.2112	2.88333	4.62776	2.56913	12.5768	2.77324	2.80991
			6.47356	8.85733	1.54335	7.82725	7.21258	15.9748	4.2052	2.68835			7.71263	3.02725	3.50099	1.42222	4.17818	3.1608	1.62152	3.10688
			3.91918	3.1472	2.91092	6.94907	37.5643	4.17396	3.82329	1.89103			2.10481	11.0162	11.0353	2.64855	10.1832	15.7708	3.10811	3.24406
			4.01677	22.02	1.57001	2.01934	23.1934	6.56414	1.84642	2.26152			9.10582	6.16196	4.09647	1.05767	23.5235	9.08511	1.24763	4.71722
			13.1293	23.0655	11.9191	13.7124	19.2589	5.86496	5.42983	1.18865			1.1734	9.28099	8.47994	2.07434	3.12419	17.3897	1.6142	2.12867
			6.27299	13.6071	8.72513	8.91372	26.0305	21.4878	3.18152	2.01453			9.13231	3.15389	5.10127	2.2283	1.00825	2.70416	1.34436	1.68283
			10.1637	10.7805	20.516	5.16375	1.67162	3.47273	4.54082	16.0645			3.44072	6.3101	3.10378	5.49517	2.82165	1.78634	2.29045	1.96967
			6.10931	14.7161	5.16756	3.58833	11.685	13.3623	1.16677	3.45017			5.68729	9.09045	5.37817	4.58927	5.52679	1.468	2.24493	1.81456
			10.1622	3.99428	16.6691	2.97151	15.1804	5.17874	1.06682	7.28704			2.24942	1.48893	5.47093	1.52485	2.46787	11.2351	2.57736	1.56591
			2.44833	2.19243	25.6074	6.63623	5.77549	31.6413	4.37459	3.45943			6.58648	7.88617	8.41743	1.67693	22.9709	1.1059	1.0168	1.95642
			30.1938	1.93124	17.2332	5.26427	3.62123	12.1876	2.97636	4.28068			3.20304	7.85016	4.69128	8.7029	6.44356	9.73186	1.35249	1.77091
			7.76382	9.29533	12.3233	5.7685	11.3328	2.75103	18.2622	22.1706			17.7298	4.29484	6.60208	7.96316	7.20112	9.90938	2.91955	4.12328
			10.2913	5.96891	6.98886	8.4891	10.1673	14.4291	6.85331	9.02679			4.02061	9.56449	2.74353	2.93236	6.87357	14.8973	1.63859	2.11698
			8.31635	6.57408	29.2995	2.80584	8.35627	9.0737	7.17946	3.81294			3.71421	2.06231	9.93504	11.0119	12.1863	2.44767	2.4465	2.12556
			6.43437	8.8083	14.0678	3.46368	3.84671	3.04708	10.1327	8.21789			11.0925	5.04657	17.6407	6.48305	11.2787	4.08264	1.73368	1.21282
			3.86923	18.7956	4.5228	3.54007	2.91944	9.19444	11.2121	2.48227			5.48254	2.2912	8.66006	3.01935	7.50914	3.95641	1.20862	1.77247
			3.91995	10.6447	13.7087	5.67683	11.4188	5.3288	4.38721	11.6789			7.93528	1.44013	4.9077	13.8003	1.26505	20.3166	1.36955	1.25803
			5.14796	9.66422	4.77538	2.90315	9.70008	7.32813	11.0291	1.04045			14.2683	6.83759	5.42119	7.16084	1.31262	9.46028	2.39773	1.99149
			12.6812	27.1378	19.3795	1.08888	35.8637	1.59482	25.065	2.12259			13.4644	4.89669	6.50664	13.3322	7.62748	1.88793	1.12897	2.85902
			3.56953	25.7506	8.82476	4.49385	18.7319	8.51231	13.1364	5.93939			1.96521	6.62206	10.5238	2.54309	2.03847	1.68224	1.55406	2.86136
			4.82828	17.3329	7.71485	12.4482	16.7986	1.36221	7.32149	1.5877			2.1671	1.3983	14.0658	7.69155	5.45116	25.8955	2.10676	1.37183
			3.53725	12.1404	10.6385	3.49745	8.35264	31.0485	2.85222	4.42656			5.39806	2.99529	6.82186	15.2057	10.9847	3.48468	1.18099	3.47967
			11.6315	9.48741	6.43486	5.40501	11.4106	14.1099	7.12159	17.2261			2.29668	5.24757	7.43818	2.98556	10.6925	5.47018	1.84585	3.38427
			8.64217	19.3067	4.61292	6.35718	19.9878	9.87657	9.60453	10.6237			1.49628	4.65793	3.31952	21.2312	3.0394	4.19228	1.74019	11.6267
			5.11645	19.6973	26.487	20.3783	6.56059	17.6849	7.72549	3.24872			8.64906	3.91201	7.67072	15.9898	7.33287	5.56674	1.3533	1.11639
			8.15497	6.0099	19.2811	1.0527	15.0536	13.2006	8.17158	2.43519			18.7013	5.56941	9.2784	11.6963	2.76492	8.98855	2.64238	1.26883
			31.5648	12.3557	1.24636	6.62739	5.4658	1.45567	5.16892	5.60672			1.19487	1.75674	5.56771	1.49137	2.1629	5.57176	3.07885	2.44115
			5.0373	11.1984	10.4741	22.4218	3.55241	7.06005	5.95588	3.68481			3.60539	3.00459	5.1127	11.1271	2.90948	1.34579	2.85371	2.66377
			2.21165	8.15009	7.10627	59.1776	4.46428	3.00001	11.3952	2.99323			3.63402	2.18721	9.36443	15.7245	2.31783	2.4185	1.81415	1.12407
			7.85834	6.6866	6.16516	6.90966	10.1827	1.36972	6.93012	18.7019			2.20075	4.37675	3.96138	29.2535	3.24374	2.66544	1.90681	6.23336
			1.77362	8.55595	1.1499	15.6207	2.75011	2.51297	19.2459	5.55269			4.03279	3.34153	1.62313	9.58314	8.27281	10.887	1.72312	13.9428
			6.4313	18.8366	1.02869	4.36518	7.52589	1.07845	4.1284	7.90066			5.27993	1.49765	1.01286	1.86875	2.47092	4.08465	2.98945	5.78154
			1.24568	10.1183	4.15854	6.03309	16.8103	4.76673	4.82068	19.4969			5.56845	3.70635	7.4375	2.12378	1.91769	1.23616	1.01518	4.80662
			18.1919	8.27145	11.9857	31.2213	18.1061	6.80152	4.08316	2.72154			4.49098	1.03522	12.149	10.7391	3.10284	1.67319	2.3067	2.99934
			6.38288	2.65133	4.37177	14.6694	6.11235	4.41338	3.55291	3.44863			5.38589	7.15071	6.10338	2.36254	6.52346	1.87737	2.00353	1.2107
			3.64868	20.3853	3.46492	3.53766	3.95537	1.92088	3.06895	6.29984			1.67311	1.77417	1.78847	3.05409	2.5002	1.68124	1.48497	3.78015
			1.11427	3.48716	1.42341	12.2447	11.1317	10.1092	4.72809	4.80631			1.0474	1.04742	3.45394	16.0856	12.2662	1.98248	1.8239	2.77124
			1.37325	7.89694	3.57915	8.26875	4.52586	2.14871	1.69492	4.46438			8.98053	10.7856	1.97599	3.15329	4.80156	20.8558	3.14225	2.22839
			4.93356	3.1038	6.91335	1.95661	4.60373	1.53411	1.62548	4.65271			6.51847	7.18441	18.4412	4.54264	2.55815	2.21784	3.56003	3.96878
			2.66427	3.99026	7.9249	3.63577	4.53401	8.04914	2.40402	11.8656			5.75244	4.3936	4.93862	15.0248	12.1338	2.96869	1.1184	4.17605
			1.82665	5.93034	37.866	4.65308	3.54517	12.0594	2.32407	1.79764			2.05971	21.2627	8.90336	7.19463	4.14037	1.60831	4.94258	3.31079
			4.77909	1.28187	4.29498	3.45563	4.37735	7.95432	1.96951	6.94974			1.6273	8.48686	5.95753	7.99257	4.8223	1.75667	2.36604	2.2931
			5.00502	6.41174	21.0783	46.8348	4.00608	11.0587	14.2684	1.40631			1.63015	39.0399	5.71557	10.0391	3.21202	6.03394	2.783	3.95672
			1.43242	5.76639	4.10777	29.128	3.18024	5.33085	5.29622	1.7822			6.2185	10.4109	4.16503	10.2791	1.97625	7.08453	2.55785	4.19798
			2.40146	4.81483	7.82083	3.15647	1.94871	4.38064	16.4126	4.08772			2.22294	4.619	13.963	9.39664	5.68416	2.21533	4.26309	1.42674
			5.6513	8.24895	8.25362	12.5342	8.43777	1.92224	10.5377	2.44368			5.55985	6.15035	2.06806	4.09517	6.01659	2.30635	1.80765	1.18329
			7.60782	7.77799	21.8335	10.432	4.52858	1.15758	6.73758	2.52781			1.46979	9.89097	1.00748	43.4297	9.35487	5.65173	2.41237	1.07472
			19.4268	3.79416	2.74148	8.42798	2.40872	1.24216	4.5545	1.39319			1.03093	12.0706	3.52586	8.31457	2.37028	1.61032	4.52643	1.58685
			8.03125	2.5139	27.2707	6.18186	1.35921	1.94748	21.0292	3.51655			11.2858	13.584	1.67085	7.31417	5.59755	1.56104	2.71879	1.12955
			7.62626	2.07188	8.11021	25.2992	5.45765	12.6044	8.12634	2.34256			19.6435	18.2709	11.3821	7.59548	1.32055	1.72097	3.59498	1.55944
			8.30943	7.39946	5.59465	17.1608	4.52676	5.12416	3.51608	5.88458			9.30198	10.9645	10.1972	5.12843	1.6359	4.12388	6.01872	1.88185
			11.3748	18.9676	1.83146	6.8405	3.23457	35.9899	4.68075	2.50465			5.68944	18.9861	1.95918	3.51189	30.4026	4.58757	11.6619	2.13408
			9.0487	35.3072	6.4869	26.1581	7.85551	8.68625	7.44038	3.3205			16.2622	17.6325	10.8814	1.47854	38.5168	25.2869	2.17747	3.93807
			9.15628	6.58051	6.95714	21.1681	9.23826	18.4898	17.6983	9.42254			5.40235	28.4791	1.94574	7.49315	1.7158	7.58543	3.43323	2.89735
			25.3079	4.59462	8.44274	30.0247	3.12771	3.45977	4.79122	12.9524			16.6595	12.0677	6.09464	24.3395	7.97088	1.43732	2.17015	2.65828
			11.5255	25.098	15.4957	10.4031	5.81081	41.0786	8.4062	3.06829			9.54897	6.97817	9.75626	3.3595	8.19717	1.58317	5.13034	3.28557
			23.5597	3.82068	16.8753	3.28032	5.63242	38.936	2.74069	13.0892			6.21993	16.4695	25.788	8.36683	4.3752	7.57688	2.76755	4.08393
			4.65691	11.6164	8.38245	14.6388	3.42744	12.6112	4.29568	3.9751			24.511	18.7276	25.3632	3.0641	31.2217	1.54193	1.48903	2.4554
			5.73507	4.51185	3.79047	10.8189	3.43831	2.50478	1.65283	5.17507			8.7858	9.63653	2.86921	8.15874	5.70063	1.48762	4.5622	1.33243
			14.0576	22.1895	3.42685	16.4515	1.8826	4.23057	3.55606	2.09475			12.1492	8.68902	2.0479	1.94448	6.84917	1.64704	11.9407	3.71217
			8.20338	1.79783	1.75975	13.8459	1.01148	3.34517	1.82748	1.80378			10.5627	8.57807	18.1031	1.73169	5.17241	1.02544	5.22706	3.28337
			1.43626	7.21542	20.1048	4.45927	2.01934	16.0178	1.28565	5.4015			8.23311	6.10677	13.7748	1.25167	2.42518	1.57864	4.00544	2.92477
			5.57446	2.12733	19.7824	3.38004	7.28864	5.30152	1.42137	2.5312			8.8939	18.5643	3.75437	1.34086	7.15232	1.21152	5.42294	2.69557
			6.91005	9.87077	16.2331	2.40133	2.4875	23.616	3.26148	4.61501			6.57432	4.15309	6.40246	1.52204	5.54997	2.20577	1.69223	1.71626
			9.4214	5.48269	1.62394	4.25179	8.02756	10.3629	2.30302	5.151			6.67096	26.3297	2.6407	1.17251	1.91404	1.04656	3.07073	3.02676
			6.56424	13.6931	4.39525	4.4078	7.86456	27.9046	6.11054	2.97312			21.1834	3.93699	3.82696	1.41565	3.26021	9.65843	5.79114	1.29405
			11.8951	2.3387	4.9537	4.20595	19.5242	6.96864	6.20943	4.01666			20.9364	4.69569	3.9849	2.74461	3.31388	3.21763	1.14522	2.50036
			2.1202	2.59347	2.93567	6.09099	6.69914	10.5362	5.02688	3.61303			11.4698	6.53899	4.8788	5.40411	8.38077	11.403	1.33542	1.51667
			8.22643	18.9949	4.47204	8.28403	7.18994	6.34995	7.13843	1.50625			10.9823	30.474	8.57403	8.85623	4.81498	2.22187	2.18153	2.53546
			5.67974	12.0037	9.85029	6.6491	19.4554	1.80014	10.2621	3.13173			7.65464	3.67731	14.2594	4.02414	1.58039	2.21633	1.58657	1.9312
			5.61211	22.5817	3.00103	8.88235	2.15608	2.28991	16.7998	6.47895			5.14605	4.9937	5.0475	1.2983	4.49902	2.32396	3.57059	2.18562
			4.47478	1.8147	7.83669	18.1017	8.76104	15.9878	10.018	4.47171			13.3412	6.9805	20.6349	7.00626	18.2639	2.04283	2.42049	2.79756
			10.1146	22.5062	7.14878	12.2246	10.9035	2.63984	11.7918	2.23804			5.09808	5.50319	18.9406	1.90786	5.68721	3.98256	4.21107	1.09117
			4.5547	14.0298	2.97882	14.0968	4.189	4.00615	4.61131	3.01688			2.43987	12.9821	2.17359	22.9729	15.7673	8.41473	2.08481	1.09117
			9.12324	11.2491	21.9839	6.73274	6.9047	3.06549	16.3968	4.2606			9.27406	3.96023	5.54755	5.93419	5.47312	1.60278	2.44244	1.42565
			1.31331	31.9735	2.31566	5.88913	6.78607	2.48432	4.09789	3.51349			6.12543	1.44827	12.0569	11.2604	5.54326	1.59675	2.05067	3.55644
			14.8022	9.73012	13.5614	14.8109	3.29071	2.68828	6.1158	10.3304			2.79138	7.51321	6.19478	2.81815	1.00825	1.07472	1.40044	5.52054
			9.68191	20.284	8.27964	56.1876	7.14104	1.51024	3.1489	6.04469			9.92412	5.49156	20.7008	7.72409	6.05684	1.98097	1.93769	1.99919
			2.15555	8.07857	7.78402	6.97158	5.43683	1.22511	5.5866	1.7655			9.12587	7.76476	1.2938	13.4164	9.2835	2.09765	1.46302	4.10586
			7.3427	11.7369	19.3756	12.1241	5.79542	3.52321	4.45981	9.1972			9.13875	19.1528	25.5433	17.6339	6.324	1.56355	2.42943	3.16274
			3.99756	6.93011	3.42685	4.8678	8.37438	17.0921	3.1468	6.29956			19.4645	6.50297	16.3449	2.42293	17.9168	3.19701	1.99865	1.57918
			1.53002	6.20841	16.5993	17.1093	2.87054	9.85474	5.39617	15.3852			13.2811	8.65823	3.68179	25.2688	18.4414	14.847	1.5947	2.43676
			3.74628	11.9748	12.1907	2.93371	7.68889	26.8186	3.26043	5.37196			16.9409	7.64218	1.69841	8.7852	4.37398	1.30053	3.13168	2.88529
			8.68828	12.3156	24.8624	2.02175	10.8637	5.11803	1.47187	3.14376			2.37615	3.56984	1.91214	6.75373	4.86073	14.0418	3.1455	1.30173
			5.25785	9.03495	8.69087	9.02229	6.73355	2.64394	3.42245	2.41634			5.24127	4.81943	2.37723	20.6045	3.70425	3.51838	2.9041	1.92462
			3.5726	3.54904	1.4672	15.4358	12.4022	5.45909	3.46903	6.56755			8.80155	3.95325	1.21449	9.40321	4.82047	3.56615	3.25279	1.84128
			5.46918	13.7148	8.28282	7.21365	11.9847	3.088	2.5889	3.06829			7.77778	5.56709	15.0256	1.1578	1.19795	2.70718	3.48769	1.72393
			6.24149	3.16006	5.21832	14.6356	17.1617	1.24216	1.56348	1.94708			5.80828	6.40131	6.38566	4.72977	2.52094	2.5392	1.92144	1.61537
			2.99241	1.77533	6.08583	1.5135	13.1158	4.25991	7.86508	2.17788			14.1781	6.78124	2.46595	8.83057	10.6516	3.72255	2.41887	1.45196
			16.6396	4.12126	10.4823	2.08367	18.0898	21.3159	2.59505	9.30987			16.4512	2.81695	1.85904	5.35936	1.9671	1.44738	1.55487	2.25362
			3.68172	6.14894	14.8567	7.21525	3.03173	6.34654	1.48815	5.78544			7.01675	5.60659	1.05789	3.47903	6.07697	10.871	1.00705	2.07157
			1.62838	12.9255	28.394	10.814	14.4795	4.05663	8.42314	8.05521			6.10181	14.5077	5.3365	4.33267	1.46633	2.25405	3.39503	1.33353
			2.18091	14.9187	15.4018	12.2399	23.926	1.16099	7.78207	3.71913			6.49413	9.41403	1.25347	5.20697	7.13341	2.82737	7.29724	3.08378
			10.863	5.03102	3.67371	7.97361	13.6156	1.38131	11.0128	4.86003			9.07646	5.3382	3.45731	7.04443	8.64671	8.60734	2.01572	2.47075
			14.4725	3.7805	13.8057	9.08662	4.71512	2.09414	5.4745	5.99			14.5475	1.30826	10.9829	4.57081	2.3282	1.42224	3.25198	2.21633
			8.09503	3.22435	12.949	5.54413	33.8244	1.78582	5.88728	7.19434			3.61827	1.39831	1.95247	2.92454	4.54843	1.47655	3.19427	3.0443
			3.63024	1.94168	28.6954	8.38053	1.98584	1.24421	11.0489	3.636			4.50888	1.55458	2.23072	10.1843	11.594	9.93855	2.48145	3.13861
			5.85725	5.6169	15.4665	4.2164	5.61884	1.01978	7.55069	2.7631			6.85925	19.2074	4.38413	3.71466	37.7208	2.42454	3.16176	2.1297
			6.50584	5.84997	5.56228	2.5678	6.71182	1.46999	2.87946	3.42379			3.95118	4.49991	3.16023	1.23321	4.17148	3.26692	2.38473	1.79412
			3.43812	10.1898	2.0047	7.45893	3.21917	3.86086	3.6858	1.50187			3.41925	12.3948	4.50646	1.53361	10.0289	6.79133	2.75699	3.00263
			5.50145	7.46857	2.20587	4.10864	29.5485	4.87655	3.68657	2.49401			3.46435	5.72336	3.00095	1.72794	3.96348	5.47571	1.28096	2.73724
			15.7928	21.4244	1.57698	1.31727	22.7434	1.25103	9.95819	2.40869			14.617	3.03189	16.607	1.43849	7.1139	1.5193	2.18153	1.78206
			10.6187	36.0329	15.4532	2.25175	10.6654	2.24762	3.00782	3.77164			7.66395	9.47154	5.07909	8.17157	5.82323	15.8779	2.6562	1.43332
			3.66097	12.4948	2.74782	1.09853	8.46765	1.26058	1.61422	6.51614			1.08892	16.4265	5.01726	4.08203	7.06205	2.45723	1.50935	1.41468
			12.0934	2.63285	1.92919	1.50224	4.16908	13.0805	1.65342	9.323			6.28007	1.77591	6.86957	9.07214	2.90216	3.45249	1.79708	1.60879
			1.37171	29.581	11.4888	6.79627	17.1327	20.7183	1.54504	7.03026			6.48483	6.496	2.01698	4.80831	11.8209	4.73341	2.35628	1.42236
			3.56031	18.8406	3.37798	28.6318	3.29071	13.3397	1.79486	8.6448			2.83434	2.03733	6.95158	5.43478	1.03143	33.2646	1.73287	3.95562
			5.63901	12.9376	12.9713	7.04155	9.61949	8.34928	1.05462	3.14486			9.00845	1.15664	10.4936	6.07563	1.37301	4.40501	2.09375	2.44005
			27.4512	11.9877	54.2978	5.57389	5.99645	10.7647	1.16454	2.38134			1.65808	3.69009	4.22485	9.11439	3.76342	8.42479	3.15769	1.74916
			1.50619	11.7265	15.0242	2.59354	4.30581	12.5635	2.32294	1.44062			12.8923	6.78298	3.51443	4.09047	3.17786	14.3255	2.09863	2.28761
			12.1203	4.51345	35.5078	6.87588	1.95957	13.8725	9.38322	1.28966			2.52148	1.74454	2.6985	12.1009	3.01195	1.72549	2.94474	4.84171
			5.2079	4.00714	2.55871	27.8646	5.48572	3.7524	5.81426	3.9751			8.98912	5.28534	2.16149	7.88086	36.2233	3.72105	2.41724	3.07172
			2.73574	5.15479	14.1376	11.7574	8.99376	8.16237	1.77871	1.90442			17.1871	4.53069	6.73986	9.77746	2.45751	3.5234	2.2238	3.43142
			5.78041	5.05111	14.6555	18.2537	22.268	10.3309	10.5093	2.37587			3.7321	4.14787	8.22655	5.55149	2.31356	2.69913	2.66433	2.54862
			12.1402	11.675	8.11592	30.0754	1.59193	31.0076	7.38774	1.61782			8.39706	2.2424	7.95166	4.61399	2.16412	5.02309	1.46221	3.37878
			13.8001	13.9414	9.37687	1.81668	3.53611	15.9468	5.12476	3.13392			3.63617	1.37739	14.215	2.02678	2.74479	3.28553	1.2834	3.55425
			8.39166	7.32954	14.3166	18.0791	16.6138	10.9987	11.667	5.91999			13.7085	2.78383	13.76	3.03907	5.25232	10.7674	2.22136	1.57589
			3.58259	2.35156	9.60786	12.9074	3.99793	28.6236	2.6404	5.61589			22.7363	8.69367	9.52035	3.26218	1.23882	15.0587	2.25143	1.77219
			3.40738	2.33067	9.73098	9.26274	13.152	1.1528	5.28925	2.50604			7.35825	10.1727	9.63461	1.38404	9.15358	6.09278	1.34923	1.67349
			14.1344	8.90877	12.2681	7.6833	5.53734	6.31312	10.8983	3.01906			3.99342	6.29557	15.9981	6.60853	1.73532	2.22237	1.57763	1.85005
			9.95626	4.96914	22.9903	10.8615	2.38699	1.64189	2.93864	1.19012			3.83949	20.1415	7.87101	10.1858	14.1845	15.4218	2.42212	1.97397
			11.7406	4.12367	11.0732	13.4188	2.47845	1.45089	3.55666	2.14288			13.1393	9.25137	10.0937	3.46182	3.24679	23.3065	1.22488	1.0155
			1.10198	1.51252	4.70684	32.4236	8.83439	2.64939	2.1546	2.33321			5.47466	11.779	8.15665	24.2828	4.67896	3.09341	1.90437	4.69915
			1.80129	4.42183	32.2314	23.1416	6.57146	27.5894	1.01465	3.42489			9.13159	4.08571	17.8457	4.48538	8.24292	6.17928	4.62235	3.74177
			2.84409	4.73205	8.18255	11.0593	6.39307	13.7074	2.30526	2.99937			2.64891	13.9116	3.32692	15.9207	5.78419	16.9763	1.9954	1.05388
			5.35468	6.68097	9.23409	3.53364	5.51017	3.9011	1.09536	3.77164			6.54568	6.13582	7.09137	1.35932	4.01838	2.64079	3.18045	1.15477
			5.3954	4.48693	16.0814	14.7731	25.5596	9.06278	4.1447	10.9671			17.6482	10.3987	6.32047	8.35024	3.1437	3.47462	3.56328	3.38975
			6.86241	4.02723	4.61419	5.73714	15.9039	6.01912	4.05476	9.66209			12.3998	12.7596	2.49553	14.9625	3.83844	2.0197	1.54024	4.37016
			4.22503	22.3157	15.9989	16.6815	2.3734	5.43999	4.80883	3.27721			2.4549	30.0906	11.0521	5.54242	13.8563	1.69482	1.23301	1.19316
			5.0081	3.48796	26.2966	5.52564	2.21494	10.8841	1.67033	6.17376			13.0477	4.86125	11.4345	4.36272	4.30506	1.16525	1.33216	4.20346
			5.68204	4.32941	2.05484	8.0476	3.97258	5.56414	1.7349	4.99567			6.43329	12.1241	10.6307	6.03402	4.47279	3.35996	1.91575	3.22854
			9.45214	4.2177	15.3123	4.45043	8.46221	26.0819	2.61734	2.59464			2.4191	6.10213	6.17059	11.6797	1.97991	2.12179	1.95151	8.41241
			5.90721	1.60012	3.1692	8.31138	1.76398	6.54368	2.94018	3.09454			6.91367	13.1233	4.55216	7.81515	22.9849	4.12086	2.45463	3.35137
			3.42044	9.60797	11.3657	2.24451	4.58562	6.21012	1.45433	2.4065			5.28923	1.47267	6.43136	3.46276	3.31998	2.13939	1.04037	4.49627
			21.9589	7.22426	2.48573	43.2931	1.735	14.455	8.2033	1.36733			7.79282	7.48881	6.81782	7.67027	1.6731	11.4744	1.46465	4.26926
			6.51045	4.10036	10.6201	9.58201	8.92313	1.4659	1.73721	1.90551			2.70404	16.3602	5.7102	12.978	1.92929	2.60006	1.02981	2.36219
			2.82719	5.91668	28.3229	27.4328	4.11565	3.68623	1.77794	2.692			5.99299	12.4378	1.30657	23.9884	11.8911	3.17237	1.0103	2.71202
			6.78325	1.23847	5.41442	6.74078	2.80897	3.15622	5.88575	5.84779			4.57188	7.70027	1.39529	5.11059	12.992	1.0023	2.28801	1.7031
			3.60103	1.98187	8.75242	15.0264	2.94299	6.97137	2.12462	4.16871			10.2542	5.26907	2.55467	12.1456	3.91103	3.01295	1.31835	1.95752
			2.55054	5.18292	9.2931	7.80634	4.52405	13.7968	1.81177	5.41681			3.05484	11.4095	1.33413	11.797	7.71653	2.57491	2.09131	1.33024
			5.70202	6.45996	11.8778	3.90679	6.33783	2.83698	2.52279	3.8329			2.88159	5.89415	1.8624	3.10572	2.76492	1.0702	1.6524	2.72189
			8.09503	16.6466	11.9743	7.65676	3.59678	8.52527	1.06846	3.70382			4.1681	4.85777	11.251	13.5885	2.56486	7.39281	1.94095	1.52215
			28.6292	12.4972	9.26518	9.34799	6.29165	7.15964	3.35757	6.53364			7.13632	8.58503	26.0178	20.3341	2.63134	1.84569	1.63859	4.34274
			10.1453	2.23422	6.89875	2.79458	2.74196	13.4809	18.1008	10.9102			5.41667	9.46108	1.79048	9.38757	1.44925	5.47621	2.89354	2.77672
			3.68864	7.54975	4.49932	7.88998	2.79086	8.24559	3.33836	6.08844			4.67354	1.95774	3.94996	20.3698	5.17302	8.46401	1.43376	1.9663
			2.47369	7.72575	6.95777	81.0389	5.27655	2.02729	2.87408	4.98364			4.42798	3.32004	11.9466	10.0653	5.28342	1.99706	1.14197	2.258
			3.08386	2.10805	1.34408	4.66917	5.12894	6.68079	7.56991	1.48218			6.16839	7.5318	5.19335	22.0611	1.72129	5.526	1.0355	3.23951
			6.46511	4.29807	1.44816	12.5809	3.53158	1.23943	4.18774	1.61235			5.45175	8.8389	5.25048	9.7033	2.01712	1.71342	1.05338	2.45211
			8.54151	9.0245	6.24638	8.78505	1.33748	19.8841	5.27234	3.3505			3.75215	1.37158	14.5719	3.02092	1.34251	2.46226	2.59362	2.2273
			8.23489	5.87328	4.42126	19.6586	3.79962	5.70602	2.95709	5.36649			10.582	19.5833	10.4331	8.13808	2.46665	10.5717	1.92875	1.475
			22.0627	3.48234	2.67484	4.2928	2.10265	1.23193	6.88964	1.99192			9.05999	1.73467	4.36599	2.43263	9.23288	6.71388	3.70064	3.72203
			13.1116	4.4138	4.57547	3.68483	3.80596	8.10848	9.62842	1.84535			9.84393	7.57363	12.5737	11.3092	3.32608	2.52562	1.67273	1.41468
			6.9431	5.13068	42.0093	7.82403	1.51043	1.87313	2.25452	3.38441			3.18371	10.9767	8.09079	7.03348	4.68384	2.27517	1.27852	1.83799
			6.12775	18.5151	9.0767	4.33462	1.19168	9.37861	1.82022	3.99479			2.81214	15.8659	9.40274	2.99557	6.03916	3.45501	1.1818	4.2901
			14.5371	12.5976	10.7673	3.35672	5.50746	2.9891	1.69339	1.18684			11.1491	8.79882	8.55857	2.39133	3.66948	1.91861	24.0546	3.04101
			1.4232	5.52448	3.14064	5.82721	3.6321	5.83835	10.8037	2.66246			13.3756	6.46985	7.34408	6.17233	6.25508	3.17589	3.65106	1.70968
			22.1634	11.4677	17.2789	4.01455	10.7596	1.32129	14.6594	5.12694			8.72352	5.09362	3.05875	5.457	5.94705	3.13013	1.76863	3.1123
			3.1584	7.24756	20.1169	16.0445	5.89684	1.34311	1.67033	7.16371			3.24384	4.90947	3.64684	12.4845	1.55477	4.00922	2.796	2.50036
			7.00919	8.9168	12.5486	18.9485	3.70001	31.5117	3.15234	7.14511			8.15436	3.05571	2.17695	11.3524	1.0479	3.32626	8.25877	6.18073
			4.81444	16.2078	6.87146	35.8929	4.9741	1.44066	3.62507	9.8929			3.23167	17.3449	2.07075	6.32753	4.05498	10.0638	3.32919	3.38427
			4.75066	18.8069	5.45694	2.61203	24.7727	28.2866	16.5796	2.96656			1.72681	6.88116	11.6348	16.1923	4.5771	12.9274	2.80007	3.1452
			18.8897	1.50931	5.74378	12.3645	4.55031	3.76809	2.17766	4.56578			1.31014	7.57537	4.18788	3.03907	1.44254	1.29349	4.48173	2.32051
			7.77688	2.31941	32.7124	5.55057	1.38456	8.34041	1.2491	6.20549			9.96635	8.08776	1.46586	8.47948	31.1461	1.70538	9.4739	2.10557
			3.51727	5.944	13.5062	1.73867	8.27296	1.75376	2.35983	1.62329			13.9827	2.16223	7.21235	3.09007	1.60052	2.11374	1.97021	2.64403
			7.21437	6.70267	11.0744	3.24976	29.7848	8.97752	2.974	2.94249			3.84378	6.06553	3.86863	8.75359	2.5612	1.31411	1.055	1.68336
			11.1735	3.76684	5.75266	1.86091	10.9379	8.36838	2.96247	3.93244			4.74871	6.24039	9.83893	5.0164	3.87809	2.12179	4.71825	1.46622
			3.20989	4.68946	18.8013	2.42546	27.4187	14.2183	5.50295	2.42838			23.3126	3.60237	1.55794	2.61131	4.39472	2.8143	6.84452	2.25471
			5.09417	13.1851	6.16833	2.52518	5.84522	5.49183	1.32596	3.40301			1.67812	11.348	1.78847	9.87948	2.26293	1.63563	2.29207	2.15163
			6.35752	5.41196	7.89254	2.09815	4.13195	6.40862	3.59356	7.74018			2.8909	3.62677	4.20401	1.19817	2.8369	2.12077	4.81416	2.0957
			8.20569	4.95869	1.80163	14.4876	3.14401	5.13508	3.60509	4.61173			3.18013	4.67536	5.45412	2.7008	1.89025	4.23319	2.01572	1.33682
			1.90042	32.0603	27.859	6.56064	5.20591	7.06551	4.82421	9.67194			1.6817	7.38599	7.46909	1.59589	1.52976	2.35887	2.76999	1.50461
			13.6795	31.7171	10.7095	5.0978	4.12289	3.71011	7.13638	2.5312			2.09694	4.80548	4.60929	1.73451	4.23003	1.0395	2.10188	2.41702
			19.5214	6.97994	7.03392	9.28124	11.1064	35.4196	3.34989	3.55177			5.23984	3.04467	10.4734	8.11993	3.18823	1.06993	1.7158	2.13189
			4.75989	9.87961	7.4572	6.43358	2.39333	1.31447	3.931	1.22513			8.47509	1.8311	4.93055	16.7452	1.73166	2.01396	3.16745	2.3918
			1.91886	6.2944	1.10421	9.37613	17.5583	2.86904	2.13461	1.64736			4.09364	5.37712	7.38037	10.2318	4.78936	1.78899	2.49364	4.23965
			7.04377	1.97383	3.12922	5.80309	4.81744	14.8541	2.25914	1.88035			7.48783	4.02471	1.91012	2.41198	13.8636	17.6984	3.20159	2.8162
			6.47971	14.9323	5.5737	9.70264	15.2945	10.5028	4.87878	2.68106			3.17082	6.9102	1.62582	5.90384	1.70848	1.37904	3.42104	3.57947
			3.12535	4.1309	4.59197	7.67445	16.9914	2.05935	5.46759	2.43494			2.56944	2.14713	1.67488	9.57031	7.25358	10.1384	2.07424	3.77138
			4.80061	8.42656	10.3853	14.7956	6.11054	14.6924	3.17386	1.36842			4.22251	3.82022	1.60969	4.04479	1.43888	1.55149	3.85669	2.17247
			4.95046	1.98026	5.7882	4.73109	15.807	19.262	3.09545	2.08381			20.824	5.48808	5.89301	4.66719	3.45295	4.66641	16.854	3.438
			4.33877	10.6696	5.39602	22.7741	21.5345	1.47749	5.22238	3.45551			6.82704	7.94369	6.95829	1.17908	10.7828	18.4908	1.61014	3.33053
			4.56777	5.00289	11.9204	6.12315	15.5227	12.0444	5.82425	2.06631			4.52749	4.79677	3.92106	7.43401	1.80363	3.08091	2.68709	1.57369
			13.077	9.36123	2.73069	53.8522	12.2265	15.2279	2.83103	2.97531			9.80957	1.00618	2.33422	5.43384	1.87927	1.88447	2.35141	3.01689
			1.94038	4.50702	18.861	8.55585	5.18871	2.65963	2.14998	1.82675			1.09321	3.01737	4.00238	7.19933	10.5845	6.11587	4.11841	1.64278
			1.88735	12.9706	5.15804	26.0906	1.61457	2.40792	1.45971	2.14944			2.7291	2.18256	22.039	3.31632	5.68111	1.40708	1.34436	1.62195
			9.1778	10.3184	26.7199	15.8242	7.79212	4.61052	1.91784	2.00614			1.26791	2.40158	1.77435	2.81752	1.91831	2.32485	6.10975	1.55724
			11.527	7.39062	10.7889	1.85046	6.28441	3.18828	2.68575	1.78518			8.5789	1.80554	1.56264	3.07161	2.82104	2.18581	6.42512	1.3445
			3.3582	2.91896	33.0418	6.61211	9.84225	12.0362	2.12308	1.00635			5.47752	2.36614	1.02361	3.62767	2.13118	72.5138	2.87159	3.53231
			14.9766	12.3557	15.0737	33.3999	6.758	11.3097	3.63968	2.85717			6.45905	2.30224	3.37598	7.47595	5.46763	4.07148	2.19128	1.90598
			4.7791	3.92998	20.9323	7.29568	9.31613	3.82948	4.58053	1.70971			11.6395	3.15215	3.0117	5.0308	4.3014	1.41902	1.21187	2.07925
			2.29234	4.63481	3.22822	15.4398	9.95091	5.74695	3.87489	5.55682			9.34494	1.95019	4.43723	2.99025	4.52464	3.04272	4.13792	1.04072
			9.45599	11.8333	2.39499	27.7641	4.1564	43.3426	1.23065	3.61522			8.70419	5.88311	15.7091	6.44112	5.85922	5.96787	2.16609	3.09804
			6.36598	9.05665	18.3	6.78581	2.86058	6.85405	1.39899	4.9552			1.30656	10.5341	7.1485	10.3398	18.9616	2.15777	9.80389	2.48721
			11.0736	17.4213	8.17621	15.3031	6.33512	1.84653	1.92861	4.00682			1.96306	2.85354	9.03106	2.59034	7.58966	2.95858	4.53619	1.64717
			6.2438	5.11942	2.14305	25.9828	3.16031	40.2321	3.1239	2.82764			18.1522	6.18636	13.9038	4.18685	2.16717	1.86358	6.01384	4.62787
			5.31241	4.80921	27.8711	20.0173	5.4323	13.0621	1.26908	4.55156			7.61384	2.01816	6.7365	3.56133	5.97694	6.40409	11.714	5.05227
			7.32656	8.77053	5.94621	16.063	7.0043	6.36973	1.13764	4.91801			6.65665	3.25555	2.92701	11.8111	12.4473	3.77192	4.09403	2.35012
			8.69059	7.72656	12.9751	22.7001	10.1619	3.45704	4.08551	2.51807			1.98024	1.45466	5.56771	1.79146	7.03216	1.71142	2.40993	3.10023
			6.10855	7.91783	10.5249	10.3178	9.49271	1.21283	10.6146	4.0112			5.79897	8.24693	9.49414	3.06097	21.1087	2.15598	4.33705	2.16369
			4.21965	5.03343	5.45313	21.2533	4.51137	4.38746	4.72505	2.75654			7.28808	16.6647	24.3792	7.54009	12.939	2.83565	2.91548	4.31532
			9.29	10.5804	1.94505	4.407	5.72207	2.17258	8.84053	2.93484			1.73325	13.0611	11.7766	13.2521	2.51057	3.49444	3.29099	5.48764
			6.1462	3.54181	18.8115	9.59327	6.19747	1.17395	6.28085	3.67538			14.2698	4.16646	17.136	1.32302	8.11117	7.36541	1.89705	3.23512
			32.593	3.42528	7.86081	7.06406	4.21617	1.45362	10.3248	5.21991			4.49384	2.06231	4.58778	2.45203	7.26883	2.15359	2.31727	2.64293
			17.1007	2.10081	11.9667	65.6603	5.24938	2.66713	9.68608	3.10876			12.4957	7.57886	2.64473	1.51828	5.50667	4.58585	1.16636	1.61537
			4.52089	3.55788	3.9523	4.26224	3.09874	2.70124	3.39754	5.16194			10.988	19.6152	6.46967	1.24761	9.79769	1.24358	1.73694	4.36686
			39.9726	1.76488	20.2279	1.64539	9.39129	1.68418	2.21993	2.03568			14.438	5.12441	17.5984	7.67684	6.52407	1.21613	2.42943	1.49145
			3.57875	8.49487	7.68439	3.49665	9.68831	3.45499	4.33687	4.50015			8.5295	10.9338	5.75859	11.848	10.3247	3.96048	1.36712	2.16808
			4.24347	7.84229	6.31428	10.0275	7.18994	7.68829	4.91337	6.75351			5.99513	8.55831	11.2477	1.06987	8.07091	2.18164	7.87188	1.69652
			4.67305	3.30392	11.5098	3.53445	21.7618	3.06072	1.76334	1.82785			10.4424	4.15774	17.9754	8.49919	3.7805	13.5684	1.74425	1.42784
			7.82146	18.3697	4.34131	7.01662	5.21316	22.7327	15.6349	4.90707			5.76174	11.5931	18.5413	8.39937	3.70059	6.74243	4.31918	1.21728
			19.2754	15.9369	18.9714	6.25745	16.1212	14.9387	2.50819	4.55813			1.4476	22.3363	8.00005	1.32865	5.92631	13.8172	4.52562	3.94465
			3.57337	10.9646	14.9721	4.86861	2.75735	25.511	5.68589	9.03531			4.6535	1.3983	2.70925	22.7461	5.66038	8.01943	3.6218	1.01111
			32.7505	2.18761	5.8066	11.7614	4.32755	30.333	2.60504	3.59881			28.7966	15.2361	11.4795	1.92101	2.34467	1.6231	2.87809	2.68022
			8.51538	9.95435	1.80988	10.0549	6.42658	10.6521	3.02858	3.11642			5.10238	11.955	17.9385	1.51953	3.19677	13.4801	7.2883	1.33791
			3.16608	5.04228	13.3361	4.69892	4.23156	21.9537	4.33072	2.70512			7.25372	8.29573	11.9567	2.50147	4.20075	2.43286	1.97996	2.10447
			3.58951	4.151	17.8456	5.01095	2.7329	10.0621	4.22079	3.38332			3.92182	11.5542	6.26535	2.97836	9.61227	3.87575	2.10757	1.84786
			4.099	18.8093	11.5631	2.63776	1.87446	1.9161	13.9399	4.68502			13.7665	3.79349	2.87661	4.28511	6.94738	1.68218	3.43892	2.96863
			6.22689	23.1146	2.78844	2.84445	2.94751	11.5607	11.7615	1.69111			15.4224	5.69315	6.87092	5.00796	12.3241	2.48	1.82553	2.46308
			6.15542	18.3198	7.31505	2.18983	2.45943	5.33494	2.34907	1.5325			8.87386	9.90143	8.83682	13.5935	62.3117	2.72764	3.40234	4.27036
			3.0462	4.7634	4.65861	12.4811	4.07309	19.2947	2.08618	5.69465			3.72351	21.0821	6.23376	2.34501	9.08161	1.63861	3.17395	2.03429
			5.72969	12.5502	11.7642	12.1635	3.91734	6.59006	4.05937	3.36691			4.46664	7.09726	22.4012	1.7198	6.45149	3.16326	1.26226	5.48325
			2.69117	7.27087	5.65049	7.98165	5.58896	7.6842	2.86485	5.83248			17.4055	14.4513	9.22127	2.4974	1.09853	2.45732	2.96506	5.30121
			1.30486	8.63713	7.43753	3.73952	8.11721	10.3888	1.02695	4.35139			9.34493	6.2613	16.7388	17.3648	7.33043	2.87086	2.40993	2.84142
			4.60696	15.5809	27.7752	19.1865	3.4193	22.8896	18.3083	1.65501			4.2447	2.52415	1.5949	1.18471	1.43888	3.29633	1.5882	1.2107
			4.74528	13.9157	27.2898	2.48175	8.41965	12.3602	1.92399	1.02276			11.9373	18.2256	10.4149	17.3582	2.67648	1.24	1.00217	1.68775
			4.64154	36.9258	12.4192	8.49312	5.15158	18.2381	1.87249	3.2444			16.749	1.97808	6.74524	2.29463	1.1339	1.37009	2.35791	2.89845
			9.20931	6.98074	12.3677	4.46973	9.90201	14.1863	4.90876	1.80925			19.0378	12.174	30.2252	2.07903	5.97999	2.46866	2.35547	1.15258
			6.89776	6.11036	5.42394	22.5995	8.33453	40.6038	3.71193	5.37196			6.38531	6.45417	6.46228	2.59535	1.64322	4.24035	1.5126	1.82373
			4.9935	2.23583	6.27811	6.63061	2.42683	40.3964	3.18078	2.94359			14.2061	6.46695	8.90538	2.22016	1.27907	8.57737	3.21215	1.39384
			10.0116	22.6388	2.92615	1.30763	7.91527	7.28515	4.35839	3.46536			9.4917	4.94374	1.56063	18.0479	1.47609	10.6146	3.37634	1.45964
			1.69293	2.73572	4.87882	2.19868	6.45193	2.17327	2.82796	4.56578			3.96049	3.55996	1.13115	2.04618	14.9103	3.1555	3.33163	1.23593
			3.95837	15.3189	10.5997	4.89113	5.45494	1.80151	1.40437	3.20064			16.5579	6.83527	1.33614	1.27827	2.16839	9.70459	1.38744	1.61208
			4.09593	9.33632	12.581	2.8549	7.88629	17.3759	8.32706	2.6209			2.999	8.28527	10.9997	4.11957	4.56063	1.44587	2.91548	2.15602
			3.53879	39.2653	6.22417	2.34826	5.17513	7.05664	3.8034	1.79722			1.85925	2.6415	1.32472	7.10138	6.31364	2.49313	3.68682	3.2088
			1.75979	17.169	12.1697	7.03833	7.12112	5.52048	2.0416	17.4001			16.2407	4.10546	9.00955	4.7354	23.2039	7.26278	1.15335	2.27226
			6.47125	5.31231	2.31249	1.06556	4.37011	10.1453	2.1569	1.66595			2.56086	8.99518	6.45556	1.56522	1.43217	1.92087	2.73992	5.68065
			1.97342	4.95869	20.0071	9.73722	3.90376	3.15212	1.6857	3.39207			6.57145	12.109	5.5536	4.42718	4.91135	1.88984	3.06747	9.09124
			13.8017	26.3719	3.52014	2.6635	2.52825	13.1685	2.25299	4.62923			8.38202	2.6357	4.87948	2.10125	1.83535	1.92683	1.3346	2.19879
			1.41014	14.1712	7.69581	7.11473	5.16517	12.2893	1.03848	3.88431			9.64061	19.452	10.9734	5.58685	7.67993	4.00583	8.30348	7.96278
			7.05683	10.6688	7.42801	16.0381	7.81114	4.69579	2.37444	3.04203			17.8079	5.97025	2.51031	22.0777	1.84816	3.96108	1.8873	3.16165
			2.54132	4.51345	15.0153	11.3738	10.7695	2.55321	1.04386	2.67559			8.45218	6.88755	4.1321	19.9511	1.00033	1.77825	2.66839	3.73081
			6.23995	2.26075	5.62447	37.2818	26.9922	18.6119	3.61354	4.47718			3.60896	3.11264	7.75608	2.30746	2.66977	6.95367	1.29965	3.42594
			1.12965	13.4592	11.3879	11.1566	3.88293	5.71489	2.51895	3.20939			3.04124	10.3075	2.59298	7.09544	1.74264	1.12006	1.54755	2.1797
			6.49816	11.4267	5.32303	16.9742	20.0041	2.04776	1.07999	1.01073			10.3981	8.81334	1.46048	1.88377	1.4096	1.71798	2.85859	1.08213
			4.47401	12.5567	2.87411	10.5712	7.5431	6.12144	1.15916	1.68455			1.88073	4.41974	16.2038	2.10782	2.39895	5.3067	3.48037	2.19514
			3.25599	6.7517	4.03098	5.88994	3.02177	23.1549	2.96632	1.04683			12.0841	2.26971	4.7007	6.59351	4.70945	1.81405	2.40099	2.16041
			2.10637	9.9873	3.21616	15.9159	11.7475	8.98843	1.18837	2.07068			2.63459	3.76736	7.35618	8.71416	2.02261	2.19298	2.17991	2.39119
			5.63517	7.22185	4.48282	5.4991	38.2389	1.31037	1.5189	2.61761			15.7589	1.55516	3.13805	2.49928	1.23821	4.65627	2.71472	1.67492
			3.50421	5.05352	23.6852	7.12358	6.44559	16.5505	1.92015	1.56532			8.80155	6.94215	1.8046	4.05136	2.30502	8.98434	4.73776	15.9148
			6.25301	8.55515	10.7711	54.2696	2.1923	3.70874	1.66572	4.53953			11.3159	3.95732	17.7469	4.2751	5.07848	1.15228	2.06286	2.44059
			14.5386	8.92002	11.3308	13.4751	4.64358	2.27354	6.11327	7.25231			10.6787	3.10335	2.92701	7.30635	9.27862	2.64052	1.48822	1.22647
			5.23556	2.96075	21.7218	3.98882	1.56748	24.3746	3.91179	7.80799			1.74757	3.84462	1.35429	4.6337	8.22096	1.16481	1.21025	1.72972
			8.73824	3.46948	12.1126	7.08739	4.36648	15.0369	3.64506	5.10944			16.0059	2.43005	1.82678	1.93634	5.26756	1.29609	1.42726	1.41326
			21.0829	9.09924	23.1852	8.47624	12.2908	9.90181	4.30689	5.46166			6.67096	6.01905	2.20921	1.24323	3.92445	1.97338	2.40261	1.91882
			11.8136	2.58784	4.99749	9.77662	2.61337	31.3459	13.2281	1.93285			4.27979	7.64973	7.19084	1.27827	1.52489	4.75771	2.74886	1.72508
			2.64122	5.55984	10.8136	23.6619	4.44617	6.08188	2.3975	2.65481			4.13517	5.65655	2.47939	1.72356	11.3683	2.83267	4.32811	2.67369
			7.52099	6.62632	2.78654	19.2734	9.02093	11.8343	6.96343	11.8673			23.8474	7.49869	6.68609	1.76236	6.45575	1.74066	1.72149	3.15687
			6.81707	10.9027	3.30564	1.81025	22.1439	7.60985	3.47749	2.3343			15.1847	9.37801	12.3828	16.9327	7.87268	1.73409	3.28774	3.2765
			9.11709	2.04777	14.1548	2.70291	8.4604	6.58256	4.61743	4.41155			8.01189	10.1466	6.64778	1.07988	15.2068	1.02219	3.30806	1.25117
			12.5537	32.2034	2.19889	14.3002	17.0467	3.4966	2.12462	3.0486			4.94059	7.64392	7.55647	1.83433	29.2784	1.31698	3.67707	2.67755
			14.6631	11.0932	3.54425	9.61015	5.70305	6.94272	9.59153	4.1895			7.50144	5.65306	18.6764	3.36263	9.37744	1.71261	5.74237	2.16272
			15.8673	3.82791	7.38359	8.59928	2.013	2.83357	9.39705	3.14595			5.746	3.79175	2.56945	1.87876	4.24101	1.86597	2.76187	2.7941
			9.76875	23.4955	1.56683	2.56941	3.45914	4.64394	5.20316	4.17309			9.17813	1.22229	16.3026	1.50514	1.48097	1.39336	3.90221	1.93657
			4.44635	6.45996	2.65581	28.0954	7.19447	5.93726	3.10929	2.85279			4.27406	3.12136	18.8902	4.33643	24.0237	2.5892	2.89598	1.17476
			3.97451	22.7433	8.51572	4.53567	6.0544	10.8152	11.8622	1.46468			5.97437	4.08512	9.68233	2.21296	17.0866	1.43573	2.7261	2.13803
			13.3014	19.6628	9.87313	26.8706	5.36438	6.23399	3.20307	7.18668			4.71148	1.37623	11.8075	10.6943	1.74142	1.00012	4.18669	2.24917
			4.53626	3.75799	38.3515	9.35201	6.96627	17.9591	3.24842	2.2632			5.32217	24.9098	9.83759	2.42012	23.4899	1.99844	2.13195	13.3075
			7.57939	10.5812	2.06753	8.40466	6.82773	7.02253	8.55228	2.31571			6.60438	15.7694	9.60773	1.35118	3.45539	2.09153	4.20457	1.22107
			10.1307	1.12033	1.70962	11.4132	1.78752	7.64123	2.50588	1.33998			2.71335	8.33756	20.7364	1.30018	2.84849	11.8731	2.02843	6.73208
			6.9746	5.2014	2.39689	10.1088	2.80172	6.38611	1.82945	1.30935			16.7547	9.00796	4.72153	3.51095	6.5991	3.68778	3.81383	2.94384
			3.37972	4.07866	5.11996	5.48945	1.9315	12.9066	1.38362	2.56183			14.4989	4.43369	4.07228	2.88042	3.84027	2.09332	35.3923	1.47578
			4.11591	3.45903	23.8845	8.81319	7.30222	8.93591	3.41215	3.73664			4.93342	13.7914	8.02022	5.59812	1.97991	4.26541	5.27413	1.7714
			1.84893	4.503	5.16883	7.35519	3.80234	3.5655	5.08479	2.51151			5.78966	15.5278	8.17749	5.77554	4.71738	3.62512	8.35885	2.68449
			16.25	2.97843	5.37952	6.4006	6.22373	3.45704	3.90794	2.25664			9.84178	10.9128	6.62089	7.21153	2.91741	2.55221	13.4573	1.7521
			8.83353	1.96419	12.2021	5.35917	2.17871	6.53276	4.21311	7.33545			22.3733	10.9419	26.1274	3.72906	2.36967	2.12793	4.50084	2.41821
			3.32054	3.89462	6.46278	4.60966	9.34692	38.0049	5.89343	5.76356			18.0377	16.2307	29.8824	20.714	8.61743	6.34441	2.48398	2.04154
			1.31946	1.86453	23.715	1.08486	6.38673	4.79129	1.31136	3.4752			1.36884	6.59824	4.03867	11.7551	5.54753	12.8678	12.8292	2.6598
			5.73199	1.49243	9.31912	9.69459	2.63148	4.90588	4.65049	1.91535			12.1471	1.00908	3.1683	2.56719	2.60511	1.1487	5.65077	9.36254
			5.75197	16.9632	11.8937	1.26098	1.17085	4.05663	3.35065	3.07485			5.32503	3.41356	4.14487	9.41417	2.37821	1.4769	5.05634	5.8568
			4.41254	9.96962	5.49945	5.3278	2.60432	6.82813	2.76185	6.27221			2.46993	4.85776	17.2388	10.5128	2.48434	11.1952	1.84852	1.33762
			7.18977	6.49613	11.4609	5.72186	3.68009	26.1781	1.914	3.80227			6.39032	4.03284	1.93969	7.07791	1.99943	3.01347	9.37517	2.52858
			6.91313	5.04469	3.91739	2.22923	7.89082	8.8104	3.23997	3.83399			6.26647	9.11659	4.97558	10.4484	1.28395	4.99939	35.3302	4.22202
			2.68964	28.9999	3.83109	4.69329	3.73352	2.64667	2.11539	3.58131			21.2629	7.61778	5.03944	17.0879	3.42062	2.20491	7.46668	1.3052
			7.60014	5.43286	5.91639	4.81955	2.0456	6.1153	1.01311	5.82591			3.75072	11.2329	6.49521	12.3102	1.02411	2.96753	16.0223	1.48427
			1.27873	7.11416	29.448	2.93291	5.01937	12.8295	1.47662	2.98406			6.64233	6.1759	7.21235	3.99472	1.36386	19.1609	7.39198	5.79505
			34.8431	27.5219	6.24765	4.53245	4.57838	4.9509	1.24372	4.49468			3.63618	3.36186	3.72883	4.93254	1.03265	7.55517	1.3835	3.26415
			3.91764	8.90716	28.7862	11.3722	2.1932	14.8336	1.86634	4.52531			1.34164	7.86526	3.50166	15.0239	1.03631	2.92098	1.5329	9.58946
			3.17146	11.5922	5.32684	5.34791	2.84066	20.0928	6.65519	5.23523			1.84779	11.8388	8.06659	1.99235	1.18697	1.59147	2.72491	1.58924
			7.21898	3.74594	2.24014	2.52116	15.5009	11.3507	1.05462	4.2245			18.1443	8.80172	16.2212	13.7806	2.89911	2.80343	2.02106	1.90956
			9.72111	9.13299	7.47116	2.8734	13.5694	5.09551	1.15532	1.31701			3.7407	2.8977	15.8858	13.9315	2.10922	4.06789	2.85327	1.87482
			21.7053	21.3674	13.6719	11.426	6.45827	3.64258	1.19222	2.35509			10.499	6.15267	9.04517	2.39727	1.19551	2.67454	1.48239	1.73821
			1.96804	2.19484	8.67754	10.0222	5.1552	10.691	3.98712	2.08272			2.17283	7.90128	10.4552	13.136	1.46023	7.61843	5.84226	1.33839
			2.45756	18.6566	27.5208	10.5692	6.37224	6.23536	1.48508	1.5872			6.05814	10.8658	7.7581	6.07125	1.48402	2.35469	1.76435	1.28127
			12.2832	22.6308	14.9626	2.24543	17.4071	5.53139	6.49223	2.88999			3.06844	2.16281	5.94879	9.60504	3.45295	2.13211	2.85537	1.56685
			2.15247	3.00174	12.5867	3.53184	9.71638	28.878	11.1412	6.69554			5.91209	6.80912	10.8921	5.86973	3.71828	1.72395	5.78649	1.79995
			3.90535	4.97959	2.36262	2.28456	9.65571	28.1904	8.31092	3.32644			4.92913	5.8134	2.71933	1.30487	3.44319	1.38501	2.47136	1.36849
			6.76558	4.12608	7.1196	11.4675	16.3558	4.35677	14.3404	1.44609			13.977	6.72256	2.99691	3.36795	2.16717	2.78016	3.11734	2.31246
			8.71134	2.03572	2.0834	2.65267	22.2589	5.51775	3.77881	5.47588			3.01332	7.61197	7.48253	1.83402	2.02627	13.723	5.81069	1.18248
			4.98581	4.81162	3.40718	6.53506	19.3141	6.69443	5.14551	3.4763			5.08878	8.19755	6.07044	21.2197	2.2489	2.08437	4.33251	2.68758
			15.5584	10.3763	6.62968	9.49356	3.72446	1.8779	2.5789	5.99765			3.72423	4.35991	2.23542	12.39	2.55449	2.05036	2.33353	5.40063
			1.88044	6.04044	14.552	3.40807	22.239	1.95567	7.29549	4.36342			11.681	4.92051	17.0916	8.22007	1.63529	4.08759	1.17939	1.51746
			1.90042	15.6621	15.4868	13.8615	23.9088	2.20806	2.03238	7.39014			2.40479	5.3109	3.61794	22.569	2.07994	2.66916	9.8202	1.30906
			53.5498	44.7383	12.0498	2.32209	6.9382	1.46112	8.05264	2.98515			3.6018	11.5705	10.6347	3.77005	16.3901	1.66905	1.89166	1.38624
			11.5501	10.4888	13.8921	12.837	10.0161	1.26058	4.21772	6.34878			5.40378	3.16841	6.5799	10.3995	14.8262	1.69351	1.11627	1.06052
			12.5544	8.53425	5.43028	2.10729	6.00822	9.78994	6.78663	2.81437			5.84837	9.00098	6.10338	8.80898	20.1864	2.13688	2.83643	1.22493
			8.52614	20.0614	2.3512	3.07429	8.59351	1.54844	5.40609	2.35074			4.77449	1.41864	3.4862	3.48967	3.85979	2.61785	1.92743	1.56068
			3.76625	8.98431	8.53729	3.15414	17.6968	1.73329	4.85956	1.57672			11.3273	2.76118	3.94055	3.3911	10.071	3.13521	7.86963	1.32604
			2.46447	2.6224	7.25476	5.64391	4.25058	1.1221	3.05087	4.52207			7.80785	11.2858	2.23542	1.51109	5.02785	8.58512	6.00007	1.39705
			9.40373	4.81322	5.96208	4.65375	18.3923	1.09618	3.68503	1.95038			8.05914	2.60781	1.03907	13.678	4.38008	4.49575	1.67598	1.66488
			8.56533	12.9697	4.10904	27.3939	5.28922	9.49389	4.51443	5.2007			10.2864	11.772	1.30119	2.19169	4.89854	2.25981	5.19732	4.18497
			4.23886	1.88382	2.47812	2.92337	16.5015	16.5028	2.02315	8.49055			9.12659	5.43057	2.56744	23.6545	9.0444	3.9939	2.86484	2.93226
			15.5522	3.63182	58.6695	2.33806	6.61583	2.191	4.71659	9.60661			12.9024	10.2959	1.7058	4.25758	3.59629	3.59946	1.54131	1.16781
			3.22987	6.43344	23.215	4.91008	15.8142	10.3936	1.698	3.89484			2.21578	1.74687	2.02639	7.63209	6.57775	3.7755	2.83538	2.04695
			8.61604	5.14675	4.4035	2.5281	4.60011	2.00683	2.44439	6.50359			3.54668	14.1149	2.1756	13.6126	1.6548	2.11242	2.65442	2.27156
			8.58224	5.30267	8.21936	2.75408	5.72659	3.56481	3.71116	1.2075			3.08777	2.68275	4.35994	7.2763	25.9212	1.5133	2.77752	2.20981
			4.73299	9.05262	18.3044	3.97342	28.7127	5.47273	1.07384	6.59948			13.566	2.82914	9.46323	1.92946	7.36093	1.52822	2.01896	1.33993
			19.1932	3.3433	7.53081	6.64925	11.7113	9.52936	4.18467	13.3502			6.12901	2.30398	2.58021	1.3008	5.32795	2.43704	2.1915	2.06084
			9.02411	5.25686	2.19001	5.61038	11.2178	6.97547	3.7396	3.05656			1.24213	1.79857	2.61045	1.01355	4.97662	1.79615	3.55291	2.62583
			10.7793	8.81875	3.53219	4.87494	15.3551	6.4359	5.51371	9.61847			2.71549	4.69395	4.04876	4.77233	2.42091	1.35696	2.79751	1.11301
			16.0848	4.45318	3.86726	6.87922	4.61369	11.0178	4.48906	22.7813			6.48554	3.32933	10.5251	3.84515	1.961	3.42581	1.55394	1.7274
			8.88732	6.03401	20.1676	7.31281	8.52017	3.42771	4.95488	6.55351			3.30398	1.29025	2.19912	9.33312	8.47409	1.08724	15.3321	2.10329
			7.78149	3.98061	2.49081	8.65752	5.94845	3.69237	6.77357	2.32553			7.74342	1.18684	1.74814	7.47877	13.6093	1.90953	6.62922	1.08445
			2.22394	1.51172	3.13556	7.51324	13.7732	3.45636	3.89411	5.76367			4.92984	1.29897	2.92701	6.94586	3.62923	4.34955	2.48925	2.19283
			8.13653	6.18028	3.05497	12.6469	9.33334	7.63236	2.95479	4.32979			7.71192	7.84899	1.56802	1.03013	5.28586	1.48287	8.96275	1.21335
			11.3326	10.2565	3.536	8.69185	18.6495	15.9598	2.22147	3.50436			3.94545	2.20697	1.80594	4.62432	10.4211	1.96622	5.63183	3.79827
			19.091	10.6335	25.4792	2.11527	18.6223	35.2839	2.80797	13.9161			1.80269	1.81019	9.02568	14.7713	5.0858	2.78493	1.27829	1.81385
			5.42922	4.52149	4.11031	5.11929	8.8362	2.15007	1.58885	13.3131			8.13144	7.41504	1.91885	4.90469	4.19221	3.59171	6.96589	1.97439
			5.79039	19.4193	33.0856	5.66468	8.53103	16.6501	3.26456	11.7947			1.92655	3.01214	1.26759	3.54412	2.00248	1.07471	2.43033	2.35569
			6.95078	1.43135	12.6362	5.86271	3.75163	11.8629	3.00475	1.72401			4.48525	7.58874	4.63349	2.37036	23.6003	1.17317	6.98903	1.90261
			6.4751	13.0582	1.1499	11.5434	6.06889	8.45364	1.69493	9.23986			12.0254	1.11191	1.7515	5.09401	13.5538	1.72216	2.20202	1.5877
			3.45195	14.7692	3.54615	7.39746	7.22435	33.3917	2.74878	7.95081			2.4864	4.8688	2.56206	7.87241	26.5629	2.73719	7.21733	1.41943
			19.9217	4.15983	18.3267	13.5069	14.6443	21.5922	1.25371	20.4489			1.63731	7.65322	3.91971	4.61086	12.4211	2.56474	3.5487	2.51777
			12.2363	7.40187	5.14027	4.09878	8.14618	6.21489	2.23608	3.44802			6.11182	2.85471	2.3611	15.8299	1.5194	7.44776	3.54765	2.23142
			14.2597	2.57578	16.2553	13.7321	11.3183	10.0075	1.14609	22.0261			2.42054	1.83575	4.89964	3.11354	21.5692	2.20551	3.38247	1.57612
			22.211	17.8264	2.43433	4.07882	3.56871	8.70603	1.26831	1.66124			4.66281	1.74803	13.4085	3.16017	8.45763	2.43107	3.1489	3.73807
			2.93477	8.41611	7.00727	1.62578	4.52858	8.6119	2.44439	4.57298			6.66809	1.04278	1.7589	7.10607	7.22491	1.10275	1.46872	1.30597
			4.91281	5.52127	2.18176	14.0044	11.2884	11.086	1.66341	2.44218			3.00902	6.67493	7.63376	2.40384	5.40785	1.27222	3.48873	1.31292
			6.45589	15.2008	3.08099	10.847	10.2017	2.64598	1.99394	11.4838			2.36827	8.15515	5.25653	2.44202	5.88423	1.84926	2.40929	1.6425
			3.80545	5.11621	20.9863	1.38702	5.67589	4.25036	1.96243	9.60018			6.22352	23.4947	4.48965	2.78341	4.06839	2.19775	1.04157	2.68218
			17.3089	2.80644	6.64428	5.10492	2.46486	9.36565	2.017	15.0495			3.02978	1.03755	5.71894	2.3472	2.58194	1.32891	2.90482	2.29162
			4.10592	22.5849	19.7875	18.0297	6.59591	11.513	12.2704	1.70671			1.92798	3.80802	1.26356	6.10849	1.42668	1.51927	3.5003	1.0968
			24.2674	12.0889	11.0865	6.26197	3.26083	7.51435	8.54536	10.4602			3.16366	43.1866	10.3161	5.79432	3.41269	1.56343	1.94005	1.2504
			4.02139	10.0251	10.561	2.61754	6.61221	13.588	1.56195	3.13119			1.62228	13.2929	19.6375	1.25324	4.19709	1.89103	2.10628	2.04309
			1.35096	3.55788	15.827	3.71071	2.77003	4.06345	3.3914	20.7573			3.72995	3.29563	20.6074	1.55302	3.09918	2.61486	2.3388	1.87174
			5.73737	17.2855	8.05626	2.77964	1.83642	5.10984	12.8469	2.87318			6.81702	12.4116	6.20621	5.62722	1.05461	1.92684	1.84116	2.04154
			26.7219	5.43608	6.62079	3.38332	1.48779	1.92224	2.2599	7.3137			2.32174	2.13493	2.36782	9.90513	1.8012	1.81763	2.19887	1.93271
			2.65582	8.6749	8.38309	4.4142	4.60826	3.17736	4.25077	8.54245			3.66552	6.22935	1.23936	9.33124	3.37427	1.16959	1.80118	1.66565
			12.8472	2.67785	8.46939	8.01072	2.50923	10.337	1.36286	4.02088			10.6128	19.7297	8.30788	3.52973	3.12601	3.67644	1.29933	2.18588
			8.35631	10.8231	8.98088	12.1886	1.56748	7.77083	5.17318	1.17043			2.5136	38.6524	9.55463	10.3902	3.25898	1.2955	1.12889	2.52935
			3.48039	4.51908	8.67119	7.51164	1.04951	18.6351	1.7718	2.60282			6.9738	8.5496	2.56878	25.6741	2.28245	2.61964	3.38773	3.2217
			6.65185	6.67776	7.28903	1.29839	2.31998	3.18418	5.53369	1.17784			3.28179	1.76255	9.46591	4.54358	1.28883	1.16899	2.43769	2.62583
			11.6015	2.68589	11.8905	3.89117	5.54368	28.2804	4.50136	1.09579			6.48912	7.37786	6.12959	24.5544	3.5048	7.70793	2.53133	1.44799
			4.34261	1.924	6.71472	15.2389	3.77155	2.74899	3.46211	6.18676			2.684	7.22972	5.93333	20.5387	1.2992	3.68479	1.75699	1.83083
			12.3316	9.69637	14.3134	1.90207	11.35	10.44	8.95276	1.62713			5.30642	4.60913	8.58545	7.50129	2.44774	1.1863	1.58129	1.42329
			1.69908	1.33973	3.64134	3.15574	1.53397	1.15417	17.1368	1.5614			14.7824	16.3161	7.293	3.58417	1.40777	1.16302	3.72229	1.3052
			3.15302	13.1192	5.90052	5.23188	5.24485	4.84176	3.39985	1.86982			1.41108	8.03083	32.0372	3.49655	3.53285	8.74863	2.31565	1.50202
			4.6646	20.0333	1.61633	4.522	1.27318	3.49524	2.38904	2.11498			5.99442	11.0343	6.92738	9.20826	3.31571	4.4868	2.9469	1.0775
			16.0348	31.0557	29.8034	2.76846	3.28981	7.31244	1.84251	1.29746			3.9612	8.2266	2.63532	3.23339	1.51025	4.07565	1.96741	1.96745
			10.246	30.15	8.8914	5.15602	5.11626	5.73876	2.36291	7.63349			8.91682	13.236	11.2712	6.54627	2.24402	1.59565	5.09948	1.23727
			1.28411	15.0657	10.1504	1.36626	3.76521	43.0056	1.39361	4.67133			5.75817	7.19021	10.6992	2.02021	1.38642	2.06647	6.35568	2.16272
			5.24018	34.4328	2.74021	4.98673	4.37645	3.90588	2.0931	1.87872			5.45819	12.0794	15.7588	1.07144	1.11683	4.40266	2.60603	1.86788
			3.66866	11.0626	10.1098	5.48102	9.22558	2.17872	6.50991	5.821			1.69888	2.76176	9.48137	7.18649	2.3837	1.79735	1.68966	1.95818
			4.04751	6.35709	5.92217	4.22735	14.7656	1.14052	3.81955	7.25142			2.96893	5.7129	6.0207	1.43598	1.57551	2.64828	2.07262	1.26429
			1.62223	10.5732	6.9376	19.3704	11.8888	1.86494	3.96483	2.90976			10.1697	13.5009	9.56942	4.65342	2.51118	2.12196	1.12573	1.79146
			4.7645	21.6511	11.6087	5.58562	9.3279	1.09277	1.7987	8.36748			13.2596	10.0397	3.82629	2.60724	2.52338	1.46258	4.39774	2.20132
			11.2058	6.43585	10.3412	2.78922	15.4928	2.22306	3.99096	5.95199			11.0868	6.8707	15.3482	7.79512	10.1149	1.70784	1.11416	1.57457
			14.9574	5.06558	5.38795	2.51533	3.09149	2.25444	6.30698	11.7453			6.33735	6.31184	12.6127	9.71081	3.1864	1.7514	1.20149	1.97208
			46.1418	6.05892	4.8695	5.35166	29.4896	2.84585	6.5814	1.77937			5.12743	1.16129	5.78144	2.84788	7.60064	3.62751	3.01108	2.69144
			8.68214	5.18694	10.6577	17.0523	7.71515	1.14598	2.44054	6.12004			19.6521	7.28084	7.33602	1.29861	3.80917	1.23523	2.49977	1.23342
			18.4601	9.22381	32.4366	2.81797	11.9983	1.75649	4.85342	16.9608			13.1816	14.9009	11.7719	1.40907	25.0246	3.71045	1.04683	1.04663
			4.45327	6.84974	8.01748	9.26678	9.52259	15.6972	5.02867	2.41401			19.2461	14.5437	2.46662	4.9823	10.4095	1.28535	2.45663	2.36572
			5.4369	5.56466	6.41986	9.69639	14.8064	3.33971	3.2784	10.1449			6.57503	1.88803	28.0872	1.57805	2.41603	1.49839	2.07262	1.48272
			29.1418	2.07188	6.03029	5.08895	5.09725	16.3302	10.8352	14.0545			6.26575	10.2848	13.4508	2.48239	1.85853	1.58909	1.96215	2.4815
			12.4146	2.42872	5.89495	4.2545	17.9884	7.98911	5.48142	3.30864			14.2977	4.20189	2.64742	1.73921	2.30075	1.04606	1.19938	1.33839
			4.72915	2.56855	28.2352	3.26513	15.5498	15.8923	1.91554	3.26217			6.31229	5.23654	2.11175	6.13696	3.06929	1.43632	1.22358	1.2365
			4.81368	12.8154	1.03262	1.62578	6.27535	8.52117	1.50507	2.57712			25.8913	7.44641	2.32346	3.91399	4.92416	1.38859	1.88114	1.6919
			19.9894	4.35593	3.5046	13.5197	6.96446	2.28991	2.44593	3.83009			15.872	7.32731	5.40573	2.56124	2.1446	2.11182	1.78014	1.03351
			7.34578	3.75719	1.01758	5.493	5.76916	30.7532	1.48662	4.95603			9.56759	7.95821	3.55274	1.00384	8.59365	1.77944	2.51555	1.27818
			5.88645	10.0154	3.58624	4.4677	5.84432	6.33972	1.3275	15.7153			12.7692	4.63818	3.75975	2.07622	20.3902	2.79209	3.69915	2.29857
			12.2563	5.80014	6.05822	7.92528	15.7273	8.9857	1.60269	4.39652			6.91223	3.38975	2.30263	1.4898	3.1376	1.10812	2.28619	2.28699
			6.72639	13.9285	16.6852	14.4028	8.49482	5.32471	3.39447	3.8894			3.42283	4.98209	2.87795	2.34314	9.45795	3.09642	1.33616	3.2109
			18.849	20.3941	4.62888	4.9524	12.0518	29.0744	2.17304	5.77603			5.35438	8.17083	4.86805	6.53875	3.79026	1.80331	2.00423	2.99787
			13.3398	19.5671	34.4646	5.39079	5.74742	5.77969	3.02397	6.93558			2.05971	12.3303	2.9875	7.11797	1.61699	3.84293	1.29512	2.05621
			5.01348	8.9602	7.28849	6.31148	10.218	6.00684	1.42589	6.18429			10.6372	11.5211	6.21696	17.3817	1.89818	1.50674	2.45137	1.71351
			34.3866	2.09921	8.41062	8.71341	4.07128	4.68487	1.82176	2.59738			7.51289	9.26938	7.80649	5.80996	1.54196	6.41542	2.00107	1.9111
			9.51054	1.50529	21.1479	5.08336	8.24217	10.5744	1.71645	3.28046			10.9615	6.78995	8.19631	3.178	3.1004	1.59147	2.1147	3.34983
			2.86023	5.05674	26.0754	1.6154	5.19324	9.41886	3.63353	1.36715			21.9509	1.94322	7.81657	11.4923	2.86007	1.46616	1.80433	1.34765
			3.46118	5.50599	58.1926	11.2559	7.34388	13.1467	2.71189	21.3593			3.435	5.49389	4.55283	1.63312	3.75122	3.10716	4.20836	1.24191
			4.6254	11.6758	4.67257	12.27	5.42596	14.9168	1.47124	7.32408			8.10853	5.84652	4.25979	7.69718	2.04579	3.02481	2.4156	1.44876
			8.63219	6.87064	13.0331	6.87203	4.31396	20.4441	1.8233	22.3311			4.04353	5.34052	6.9509	6.06562	3.77989	4.18306	1.06577	3.20395
			11.1205	20.6135	18.5363	4.50443	2.94027	13.4953	8.59456	8.70061			2.58734	1.27922	13.0886	12.7248	9.3878	1.03055	1.75383	1.12073
			10.027	7.65181	16.7804	1.73837	9.69555	21.2115	14.1505	18.2143			14.6571	4.56614	5.08649	1.09396	7.56038	10.2279	2.04947	2.56717
			6.4021	10.8159	13.7871	4.56592	6.58504	16.8268	1.91323	12.2243			9.12443	1.62197	1.75419	6.12758	16.2181	29.4605	1.01106	1.23342
			7.09141	5.10094	15.4449	17.1889	14.2603	7.38543	5.00638	5.91838			4.32274	1.16651	1.20844	1.00697	21.6418	2.62918	2.20939	1.37389
			5.56908	6.74848	4.68116	7.67694	11.8009	4.28514	1.62652	3.54687			3.36269	2.5381	10.4647	13.2315	3.55969	2.38691	1.08891	1.43024
			3.35205	15.0159	7.12665	4.15788	5.31277	18.9891	2.74955	1.48627			14.0851	6.53899	3.20056	2.47613	5.88118	2.96156	2.01581	1.7629
			1.90042	30.3862	12.8154	7.81029	11.4677	17.9162	5.46835	3.24883			4.73296	6.63716	4.91308	2.21109	2.89179	9.81976	2.32302	2.50002
			5.4953	14.2693	19.4694	18.1734	4.33298	4.52457	5.71433	2.22223			11.1283	8.11739	1.82476	4.49977	5.95254	3.68659	2.63864	2.57103
			2.69501	8.77375	15.2207	4.06125	5.82439	27.097	2.69344	2.11843			16.7426	6.88232	8.17548	2.2261	2.31233	3.46401	2.85958	3.42701
			10.2114	18.917	8.36121	4.44135	37.0617	1.03275	9.33479	16.0306			7.14848	3.11206	1.44301	6.81162	1.1583	1.27521	16.4894	3.74347
			49.8395	11.966	6.17781	4.63938	4.22069	18.0048	11.0359	18.3794			5.60066	1.41167	1.01757	1.98359	3.50846	1.78123	5.48349	1.18248
			30.9844	14.8327	11.7319	3.52226	10.1085	1.18759	3.32298	3.94773			7.60739	4.92399	2.23273	2.30621	8.32892	6.15883	16.1191	1.04123
			8.40318	14.8632	4.57159	7.66895	1.86631	11.5826	2.16075	6.58168			10.2885	2.2546	3.9271	3.1392	6.04892	4.04045	7.56979	2.28082
			14.9215	8.15251	3.68506	2.24942	11.4876	6.62417	10.7176	1.54805			20.8684	6.97992	14.8985	5.33652	4.71312	2.53072	4.38721	1.4202
			5.13063	10.2485	4.33385	3.45199	8.13532	8.54232	2.6035	20.8967			1.92512	4.46854	8.08474	8.55051	4.62589	11.7603	4.19468	2.54479
			7.82246	2.02125	2.22636	5.15363	3.41839	21.5703	2.21148	1.69633			9.65636	4.22571	1.06663	14.1927	4.1117	1.50614	6.10633	1.1161
			9.06639	11.5866	13.573	13.118	4.33841	17.2777	5.02022	6.37903			11.2257	3.82603	4.28399	20.0503	1.9299	1.43632	3.66548	1.4642
			4.44959	11.0023	1.91629	9.76027	1.67433	6.65691	2.53586	2.27117			17.0798	1.98098	9.91555	27.3197	1.98601	1.8057	5.44667	1.41094
			4.09013	9.08879	27.9129	11.4547	9.07888	3.5464	2.78645	13.3191			15.5556	3.51174	3.26912	6.59132	5.31758	6.56043	6.02742	1.54833
			5.02307	21.6294	11.3352	9.11347	6.68103	4.88474	4.58515	1.04192			5.73383	3.17829	8.57	11.0273	2.67587	2.43584	3.92324	2.86897
			4.60843	19.8476	5.98661	3.05912	6.06617	2.61597	10.2395	1.51592			5.89204	1.95658	5.06027	10.4609	4.55392	2.66081	4.04634	1.25194
			14.2226	18.5641	6.83878	1.83978	8.17878	6.0389	6.51913	2.0181			8.39777	3.00517	5.62215	12.3506	1.8628	8.09581	2.45663	1.13771
			5.43994	17.2935	9.98819	2.88584	7.14104	1.36426	6.36847	3.13663			5.14891	3.28809	4.63013	1.90442	4.80949	4.75175	2.12943	1.50742
			5.46391	9.07673	11.7605	12.468	3.55513	6.86701	7.32855	1.36468			6.67812	3.52046	1.85434	4.12333	5.65122	2.97946	2.91955	1.68726
			23.4217	20.5701	8.95629	1.70244	4.40089	6.558	2.6158	1.94346			5.25129	2.4922	8.94436	6.66987	10.0459	2.36961	3.12681	2.52549
			11.5035	4.01276	7.36153	3.2859	4.02238	15.2968	4.31765	1.61725			23.1651	6.57965	30.8697	8.43285	1.12109	1.43871	3.02476	1.6587
			22.3789	1.27865	9.6595	4.44215	6.1368	1.29537	6.43689	1.14423			12.8036	1.21299	13.5375	6.65422	3.47369	1.33369	4.28306	1.36309
			2.35911	3.92998	13.8909	7.64819	4.78665	2.57913	2.0539	1.67705			16.2543	8.76803	16.3805	3.95498	6.95531	2.22818	2.35353	1.54138
			1.25674	16.5019	23.5705	1.5068	3.52977	1.37927	3.57818	2.60035			9.31702	3.91259	3.97079	6.60728	9.51407	2.62083	3.13207	1.25889
			41.1348	1.83238	6.55663	1.90047	5.64329	3.33357	2.57583	3.04519			8.49943	1.5662	12.6853	10.3873	5.14191	1.13319	2.83959	1.83546
			14.8881	27.5886	10.5983	3.06071	4.49869	19.777	1.29599	4.55666			4.08147	4.93213	7.90999	2.80939	1.04119	2.38393	2.18203	1.64867
			31.9307	6.21243	15.9591	8.33891	2.81078	1.68145	7.92658	1.8194			13.735	1.20369	13.4911	7.16021	4.42278	2.10526	2.23148	1.22956
			50.8571	12.6201	19.1192	5.89944	3.40209	12.7122	3.18385	1.71808			1.81057	1.47441	12.2968	7.29602	2.60877	5.15096	2.31249	1.82388
			6.82877	5.78969	2.58227	20.0755	4.61188	21.3493	5.47527	3.0101			4.80456	5.57485	6.68744	4.50071	1.60113	2.23952	3.41403	1.51051
			7.18545	4.92333	8.02249	7.58032	2.65593	12.2204	3.08085	2.15155			3.68629	9.55222	15.9342	4.8346	2.34222	8.28437	1.22253	1.10838
			5.07379	4.04411	5.63572	2.07375	1.91158	2.81993	1.63728	1.04538			4.87042	4.26017	9.38392	18.9754	4.12024	1.49122	1.04893	1.92036
			38.171	4.85341	12.3542	9.98305	2.94751	1.05253	1.40514	1.77591			1.58648	3.71031	5.34726	1.35181	5.75309	1.45005	3.87064	1.02116
			1.81796	1.6837	9.26278	6.20368	2.35077	4.79128	6.18476	1.50653			8.66195	5.45435	9.99822	11.0179	7.41277	2.10645	1.8906	1.2859
			48.2049	5.21185	14.5369	7.42061	5.79632	24.2852	2.27912	1.33156			1.28866	3.72061	12.5636	3.66428	3.88663	4.26303	1.00685	1.9057
			24.8239	2.61919	8.66842	6.66282	3.59859	25.1467	1.10305	2.03836			20.2635	9.78839	25.3303	23.0599	13.4672	8.65852	2.18624	1.9605
			4.27794	8.36548	21.2231	1.89808	1.17448	14.5539	2.20763	3.32841			15.5756	7.22684	11.6872	18.5501	1.51757	5.59969	4.13892	2.82652
			14.1781	33.4997	22.5121	9.95191	2.42864	2.85199	2.35522	1.90639			7.58949	4.7749	8.93025	3.6455	2.40627	1.02518	2.09471	1.45648
			3.86776	29.0907	21.5805	9.85849	3.86029	3.75922	1.57809	1.23271			18.9877	5.53368	17.9243	3.75909	1.17294	8.88826	1.62232	1.81925
			21.4265	10.7395	1.53102	8.14886	5.91314	4.37587	1.58501	5.77899			12.1821	13.1039	8.78306	4.23254	4.35141	2.918	3.12681	2.0346
			14.4835	10.0154	9.70533	18.5312	2.29191	4.06345	3.76113	13.3225			8.07847	21.9736	69.1777	12.3368	1.14	1.14154	1.54026	2.14497
			11.7415	7.76272	11.4455	7.04851	1.66256	2.98773	5.19086	1.44821			2.57732	2.58093	2.42428	21.5082	1.98113	3.78504	1.39192	1.33607
			7.31252	11.3238	1.42648	2.12405	4.66622	1.72784	4.2746	2.28945			8.44573	2.55792	5.43598	1.92414	5.32917	2.30576	1.69597	1.16858
			5.73978	3.89944	13.9239	5.56167	6.31882	1.5614	3.02858	1.50505			6.26003	2.12857	4.76051	7.30478	10.8791	3.56187	1.53605	1.30211
			7.32255	21.2918	12.2561	8.9378	2.71026	1.27286	1.52121	8.91018			1.27435	9.84411	15.898	3.51846	3.49504	1.3862	1.55709	1.59387
			1.42171	20.5637	1.6721	1.70004	5.61522	1.63916	1.75335	7.35027			8.60968	20.8866	7.78229	6.47273	2.09153	1.78362	1.06471	1.99986
			10.4859	4.75536	1.26464	7.22578	10.9352	2.28514	1.1876	14.5626			7.91095	2.89098	3.06547	5.98489	4.62406	2.38631	1.86746	1.36154
			9.68501	20.6634	5.61281	7.08444	12.3768	1.26331	1.18376	11.6039			13.1723	9.38932	8.87715	6.34349	16.6816	2.56116	1.97583	1.98443
			10.8459	14.7049	17.6849	10.7951	4.38188	1.96385	1.71414	6.90592			6.41968	10.1009	9.8107	2.31998	3.542	1.66905	1.68966	1.12999
			1.14305	11.2362	2.96109	7.02296	21.0011	3.13439	1.24295	3.70405			4.60338	7.72523	2.76235	1.99298	5.55119	1.04129	3.50872	6.41485
			14.8714	11.0112	16.2047	2.76925	16.5622	10.9762	2.7188	11.5773			7.51218	12.8084	1.65338	3.32351	7.15537	1.67621	1.6602	3.36835
			11.3558	21.7668	2.29869	3.31784	8.91589	7.97411	4.56824	2.62902			2.33319	12.4008	4.09983	1.10148	2.17632	2.61009	1.67493	1.9412
			12.6393	6.59739	10.251	12.7395	23.4796	25.2156	6.33158	2.8114			6.00874	8.72683	16.4343	6.99499	5.88789	4.40326	1.13205	2.70919
			7.51148	26.7641	12.554	8.67908	4.23609	2.11051	3.65505	3.7253			7.95605	7.43758	4.14419	13.6282	4.82169	2.84997	3.92219	1.44722
			7.8899	13.2221	2.60231	8.26465	8.17969	24.8739	3.43828	2.72392			1.84064	1.50605	17.3537	2.4683	2.30319	1.11648	3.23938	1.84627
			11.6456	2.34674	9.33797	4.65136	9.99981	4.29197	1.51736	9.01102			12.815	3.39602	4.98231	5.17192	4.02021	2.23773	7.8044	1.97594
			14.0549	3.82068	20.5199	2.54248	4.58925	3.73125	13.8815	1.15906			3.38488	6.27065	5.233	6.53124	2.81189	1.37964	4.3062	2.9778
			11.8123	13.9695	3.35422	9.78662	9.8839	33.0724	2.17919	18.588			10.4754	1.67742	1.5324	9.37974	5.82201	1.85642	2.0621	2.44445
			22.2173	14.3609	19.2431	8.37883	5.01122	14.3595	1.8256	5.41472			8.31974	1.78158	4.25106	9.81689	1.667	2.01276	1.73174	1.2558
			5.91589	5.35088	17.5395	1.16184	9.0318	3.86222	7.61296	2.34283			2.84293	5.68688	21.4415	1.50921	1.57795	1.41663	2.55342	1.73512
			6.18618	6.54113	6.88604	4.71125	9.75079	3.21966	2.76492	5.24815			7.69903	2.97939	3.43445	7.53696	4.42766	1.53299	2.1915	1.69807
			23.1246	15.5584	4.93466	1.70244	5.58352	21.8009	3.64813	24.6754			14.2934	2.1861	1.51963	6.33035	7.55306	1.04427	3.01529	2.20132
			2.32065	8.1292	5.23828	2.55765	8.02303	8.03618	5.19778	1.36566			5.19903	4.20688	2.98683	6.50496	2.73931	3.12864	3.07841	1.61625
			6.84772	6.39727	5.8169	2.50894	14.0548	13.5082	3.74268	2.7852			2.03036	2.96365	2.68371	4.02007	2.43921	1.70187	3.35406	3.53199
			11.0989	16.4151	16.2319	2.93215	18.2039	5.47	3.73807	1.22035			8.53952	2.82618	4.31961	18.3245	2.55388	1.39217	5.9927	1.52826
			5.66064	3.79899	5.81475	3.40328	1.02597	8.14054	2.08772	1.11359			10.2534	1.99837	19.4729	2.44828	1.61272	1.08843	7.22365	2.27773
			6.35282	30.604	3.39289	6.91915	8.93943	17.1904	2.5397	2.01019			2.22723	2.55671	3.07152	3.56477	3.34987	1.09321	1.84852	2.67137
			4.86591	3.46385	3.39576	2.71895	11.6325	3.29128	1.64035	3.84344			1.05169	15.795	5.96089	9.56969	2.22023	1.24	1.86536	2.17584
			22.535	2.46086	2.74124	3.41446	5.99373	6.53413	2.61965	8.72286			2.61168	6.135	1.07806	3.68337	10.4827	1.40708	1.75068	1.31832
			2.53132	6.4471	63.5884	5.31573	1.26141	18.5478	1.85635	1.7507			1.39533	21.236	1.31464	1.06643	1.1583	1.58431	1.68334	1.75442
			1.32362	2.37487	8.17001	4.13552	12.2727	6.80971	5.20009	9.03424			3.22308	11.2829	3.23349	3.41332	2.40993	1.13199	1.00895	1.93194
			1.37211	6.15135	4.28659	1.60102	8.34359	14.4189	4.52519	5.46908			8.87529	1.60475	2.42898	1.98766	2.42701	1.16541	3.9243	1.72508
			1.14862	9.05986	17.1535	16.8687	14.9042	21.4325	3.41676	1.45018			1.16695	8.6802	6.34534	8.8265	1.67189	3.30229	4.50294	1.74592
			10.8598	6.7533	5.51757	13.0398	25.9626	16.5362	2.02238	4.88535			6.07603	8.15457	15.2043	1.3346	2.97048	1.39515	3.54554	1.49893
			7.74499	7.14389	5.33997	3.47914	14.3418	2.90383	15.8209	11.5931			2.12558	7.14328	6.61418	16.6382	7.28224	2.9001	1.76225	1.88717
			9.73795	4.63722	6.4886	1.32075	5.35714	6.11257	2.75339	1.75614			4.34278	3.87927	9.6662	3.87613	4.18794	1.64041	1.47082	3.51809
			12.6326	2.5628	10.0806	2.99843	10.5449	3.07436	6.28085	1.74625			5.15894	2.08679	6.18941	2.0684	1.37179	10.9231	2.14205	1.10838
			18.8339	14.9698	8.23875	5.25025	4.27321	1.78173	2.00624	2.43279			6.97165	8.64266	11.8021	10.3611	1.92014	2.40899	2.05894	1.79378
			71.1506	1.5737	2.64313	3.30985	2.20407	7.84655	2.51587	2.82326			13.2932	1.05369	3.92441	12.9329	7.08523	2.21983	1.09102	1.68804
			7.25901	11.1004	3.06277	12.5695	8.15343	7.88543	3.49747	1.98301			2.06543	2.63906	6.41053	3.62704	5.93546	3.19309	2.76805	1.90338
			15.8924	7.49068	1.10351	16.5493	24.3752	7.01025	3.50208	1.24902			2.97108	3.81689	3.65087	9.27804	5.89948	1.41783	1.10469	1.41094
			14.2148	7.6069	4.59523	8.0187	2.66861	4.75513	2.55277	10.2042			7.20218	6.86956	1.97128	2.71676	2.38065	2.88399	2.22306	1.49816
			14.0103	26.2453	3.23248	11.6448	7.15553	13.923	6.22858	1.13781			2.8866	6.43234	1.44099	20.8492	10.7267	4.3764	1.71385	1.61394
			53.2803	8.66945	3.42082	13.3512	1.22247	6.53958	4.72735	2.74764			7.35467	1.96083	1.69572	2.11033	80.4682	2.7718	2.45768	2.14497
			60.8609	5.89233	6.8488	6.40011	2.43498	1.10028	2.82258	2.16539			1.29654	4.05246	10.2429	2.09937	2.08604	4.23319	4.21783	1.23805
			15.3005	6.20022	1.02403	4.80228	3.41748	4.91748	1.31597	4.16372			12.3962	1.66107	10.4048	2.11846	14.398	1.87074	1.02579	1.28127
			12.155	7.56615	7.75897	12.1886	12.3931	9.25173	2.83641	1.56584			5.01647	5.71171	6.73179	7.47845	16.0229	7.20191	1.03631	1.21875
			15.3451	2.28911	7.30352	16.9142	6.64934	2.19578	1.5827	4.16224			4.80169	4.9269	8.61772	2.5772	4.27273	5.57941	1.58971	1.51514
			7.98575	2.25742	14.1008	4.75676	5.31005	5.84586	1.46894	8.52812			5.94788	6.50137	12.733	1.80085	11.7599	7.20191	1.95373	1.38393
			25.5016	2.03152	14.1	3.65162	5.84432	2.72375	3.78496	1.03698			5.71378	1.59143	8.48666	7.72253	10.6163	4.11921	1.14783	1.51823
			11.6729	9.83564	17.8496	1.03647	3.88655	8.88066	1.42666	2.00179			1.74255	1.90693	2.05731	1.93979	4.34592	1.7502	1.12889	1.79455
			33.7437	9.66307	14.3557	3.444	4.72417	3.73944	2.46437	1.3716			2.56873	2.35384	2.19106	1.81931	17.8656	5.31685	1.18044	1.49662
			4.11576	14.8712	14.4989	1.20895	3.40571	4.27491	1.67494	2.27611			3.58104	1.35768	17.6078	1.31457	11.4397	5.73276	1.96636	1.42483
			5.844	7.4298	5.33067	11.2575	4.14644	2.39223	1.92092	1.98548			3.11283	10.1166	15.5787	8.31895	6.58568	3.91871	1.49502	1.49276
			40.7597	39.2807	16.9072	2.05299	9.02546	18.998	1.27139	1.92617			8.67197	7.12692	22.2789	1.41033	8.2783	5.49586	2.80171	2.15732
			24.3039	16.0635	10.7344	4.99792	1.55118	26.704	1.20067	1.36616			2.04324	2.90491	5.58115	2.42982	1.43522	4.38058	2.2883	1.66256
			15.2336	4.14254	7.05217	6.7259	1.3085	10.0451	4.86725	1.22925			12.248	5.32597	23.6184	14.6922	12.8182	10.6259	9.42462	1.1161
			15.0491	11.6669	25.6708	2.14721	4.03868	2.78855	4.21618	1.80507			3.20447	4.60777	8.117	3.38672	2.00675	3.2826	1.8643	2.19128
			23.5331	1.63156	31.8522	6.46239	7.64089	5.86973	2.45899	1.15807			1.70676	5.85281	10.2543	2.34001	4.09035	2.78672	3.01319	1.24731
			9.32776	28.5415	19.1521	1.97154	8.44773	15.4414	3.2784	1.01177			10.4446	5.85705	3.55476	3.53317	3.55603	9.89852	5.63394	2.20672
			23.0327	30.5669	3.77028	1.74795	6.25	11.9768	3.81647	2.26029			5.80183	13.7343	1.07335	1.24792	1.81095	2.21804	1.98424	1.23187
			6.79031	15.1846	9.88149	2.83873	1.90162	2.54571	14.2474	7.73382			4.15521	14.2454	4.19662	1.97014	2.50813	8.25454	2.04211	2.82343
			8.87578	26.7675	7.45677	2.03462	2.5364	5.18624	10.3118	7.65276			2.79926	7.45696	9.27705	11.9488	7.49512	3.36018	3.51082	1.23187
			85.1999	4.37094	17.0755	3.15654	1.3094	4.54845	5.30924	9.7717			6.86712	7.79487	2.75765	8.3105	9.03952	2.79149	5.91169	1.08754
			31.9603	10.2084	17.75	7.06607	5.68856	6.75105	6.65826	5.72363			4.54324	33.9409	7.96376	7.65399	10.3802	7.39227	2.75016	1.79532
			13.9785	25.5732	1.26034	3.22201	18.7165	4.93044	2.3729	3.67192			5.27634	3.13078	5.65844	2.35784	9.02	5.38487	7.0995	2.22679
			15.3044	14.0894	5.8305	3.05592	1.59283	2.03275	2.50742	2.26968			2.65536	4.71434	2.0936	1.00384	1.72861	5.93804	1.01421	1.09294
			41.5043	4.98523	6.47428	4.78391	10.3747	2.22852	11.1788	5.54866			9.60768	3.48686	3.65894	1.59557	12.7224	1.05502	2.63443	1.17861
			16.9607	13.4041	9.76047	2.78123	6.18661	3.4775	4.20158	3.84442			11.8843	4.90268	24.3026	1.53925	6.34169	2.95141	2.91955	1.7822
			10.8007	14.4682	21.9034	6.03119	7.17092	1.52865	1.76104	1.77443			10.6565	2.57003	7.14648	1.38279	3.9464	1.90655	1.37824	4.45203
			27.3073	3.36877	11.1755	10.439	1.18806	1.62893	6.65442	2.44416			1.52491	1.76341	11.5898	1.1287	3.8604	4.68909	2.20413	3.51809
			9.56797	7.39308	6.44563	5.76369	1.62	11.0219	4.30458	3.28837			3.05985	2.82437	7.95905	1.9304	2.45446	2.74435	4.13051	4.46361
			6.32719	7.47609	2.9618	4.75437	3.6982	5.07232	4.08551	4.2517			3.49657	3.21677	8.30989	1.37622	1.06376	1.72514	2.67546	1.67105
			15.3462	7.36289	10.9915	5.62635	2.8144	6.23399	2.32909	14.4			7.83721	11.4174	9.40744	7.83768	3.4377	3.80056	1.97583	1.68341
			8.16632	1.98272	3.89345	6.18691	5.43049	11.2777	6.78202	22.3706			8.09708	1.02038	8.89126	9.4054	13.8496	1.86418	2.4398	3.62538
			4.87705	18.0543	1.97501	4.29363	2.684	16.3868	2.19149	6.08445			5.79038	2.24787	4.09042	11.8139	5.28037	2.58264	2.91429	2.24454
			18.4543	2.75649	5.68514	4.44454	6.87481	7.0007	3.01936	9.50182			8.43715	1.3056	2.79528	2.95489	1.33397	1.5688	1.41296	1.47655
			8.24546	4.35434	13.8372	13.5021	9.85674	32.4837	1.80177	2.7941			3.33477	17.6953	3.53191	2.57564	6.16298	2.22222	1.27829	2.59187
			7.45797	6.17457	4.82796	5.35725	3.41748	5.4093	2.46822	2.82178			5.52764	1.63261	5.04952	1.10273	6.16481	6.73169	1.71175	2.4267
			3.43918	13.5531	7.21688	4.3591	4.17813	7.12281	5.5629	21.5852			2.61168	9.45654	10.0312	8.29861	2.48617	2.37259	1.51711	4.74456
			19.9925	8.98942	2.00007	3.07668	6.84765	5.53276	3.81647	18.5578			1.25716	4.11725	11.9769	7.55042	4.54965	2.82252	1.12258	2.40354
			14.1056	15.8246	14.5082	1.22413	3.29252	8.32131	9.84288	1.98894			3.31616	4.55992	2.86988	9.41385	1.50354	1.66248	2.69125	1.6587
			44.5456	23.8299	6.66619	2.34205	32.5639	13.2504	1.31367	2.51435			2.58663	2.66329	4.32633	3.81448	5.08763	2.67991	1.78434	1.13153
			7.99968	17.1512	14.5247	1.37026	4.68614	4.03958	3.04857	11.2995			3.95904	6.90408	11.6624	11.7254	1.52123	1.81525	2.19676	3.47873
			8.46114	2.15831	8.08265	5.5465	11.1381	17.4339	6.14786	12.5801			3.79009	2.69114	2.67632	7.6565	3.53591	9.87107	1.66967	2.08631
			14.6752	8.22822	16.9544	5.17039	11.4804	7.29402	13.4019	7.80648			6.83993	8.897	11.575	8.22914	8.58267	2.31232	1.73595	1.86325
			77.6912	3.59617	12.9235	3.15973	30.6967	10.541	3.17309	1.58907			2.47208	6.11563	3.32221	1.05141	2.32637	3.74685	1.56446	2.09249
[truncated: 16,956 more rows]
