# Supplementary material for: Compartmentalized oskar degradation in the germ plasm safeguards germline development
Source: eLife journal article supplement (doi:10.7554/elife.49988), 2020-01-07
Supplement: supp [file elife-49988-supp-v1.zip › elife_poa_e49988_Figure_6_source_data_1.xlsx]

## Sheet: Sheet1
Figure 6C		oskar intensity per volume in germ plasm vs bulk cytoplasm, nc2-12
		Germ Plasm														Bulk Cytoplasm
		Sample	nc2	nc3	nc4	nc5	nc6	nc7	nc8	nc9	nc10	nc11	nc12			Sample	nc2	nc3	nc4	nc5	nc6	nc7	nc8	nc9	nc10	nc11	nc12
		1	15.6348	16.9184	12.427	6.44409	15.6238	8.75458	4.77175	5.84278	4.04168	1.94905	0.692316			1	8.28537	8.49402	9.74266	8.55699	8.92664	12.0129	8.82633	12.0184	13.0121	8.59243	5.259
		2	15.7132	16.7106	18.059	13.3677	7.81056	9.36204	8.14752	7.43623	1.75453	0.752858	0.658012			2	9.31004	9.18371	12.1557	10.2467	10.2849	9.62253	36.4788	10.2688	11.3	4.71606	5.89559
		3	16.6103	10.6911	14.457	13.5441	14.6159	2.02699	4.75723	5.69118	1.86642	2.73915	0.616884			3	8.06068	24.3777	23.2661	10.8658	11.744	3.13222	10.5429	13.3045	9.16149	10.9526	5.28056
		4	23.722	15.1207	5.72942	18.7195	13.2763	8.27423	6.54099	5.51578	5.53179	1.48466	0.36598			4	10.7438	9.57122	7.97044	11.4205	10.9505	8.4212	13.8628	10.4637	45.0184	11.2309	5.11275
		5	18.15	15.7589	15.8519	16.4538	17.0547	9.2851	5.85319	4.60618	1.57851	1.4409	1.01842			5	16.2557	10.1912	9.85041	12.7086	9.37501	11.6304	11.0508	9.54692	9.62899	10.7966	9.49683
		Remove outliers based on interquartile range														Remove outliers based on interquartile range
		Max	23.722	16.9184	18.059	18.7195	17.0547	9.36204	8.14752	7.43623	5.53179	2.73915	1.01842			Max	16.2557	24.3777	23.2661	12.7086	11.744	12.0129	36.4788	13.3045	45.0184	11.2309	9.49683
		Min	15.6348	10.6911	5.72942	6.44409	7.81056	2.02699	4.75723	4.60618	1.57851	0.752858	0.36598			Min	8.06068	8.49402	7.97044	8.55699	8.92664	3.13222	8.82633	9.54692	9.16149	4.71606	5.11275
		Q1	15.7132	15.1207	12.427	13.3677	13.2763	8.27423	4.77175	5.51578	1.75453	1.4409	0.616884			Q1	8.28537	9.18371	9.74266	10.2467	9.37501	8.4212	10.5429	10.2688	9.62899	8.59243	5.259
		Q3	18.15	16.7106	15.8519	16.4538	15.6238	9.2851	6.54099	5.84278	4.04168	1.94905	0.692316			Q3	10.7438	10.1912	12.1557	11.4205	10.9505	11.6304	13.8628	12.0184	13.0121	10.9526	5.89559
		IQR	2.43677	1.58993	3.4249	3.08614	2.3475	1.01088	1.76924	0.327005	2.28715	0.508149	0.0754325			IQR	2.45844	1.00749	2.41309	1.17379	1.57552	3.2092	3.31994	1.74967	3.38315	2.36022	0.636589
		High outlier?	TRUE	FALSE	FALSE	FALSE	FALSE	FALSE	FALSE	TRUE	FALSE	TRUE	TRUE			High outlier?	TRUE	TRUE	TRUE	FALSE	FALSE	FALSE	TRUE	FALSE	TRUE	FALSE	TRUE
		Low outlier?	FALSE	TRUE	TRUE	TRUE	TRUE	TRUE	FALSE	TRUE	FALSE	FALSE	TRUE			Low outlier?	FALSE	FALSE	FALSE	FALSE	FALSE	TRUE	FALSE	FALSE	FALSE	TRUE	FALSE
		High outliers above	21.8051	19.0955	20.9893	21.083	19.1451	10.8014	9.19485	6.33329	7.4724	2.71127	0.805465			High outliers above	14.4315	11.7024	15.7754	13.1812	13.3138	16.4442	18.8427	14.6429	18.0869	14.493	6.85048
		Low outliers below	12.058	12.7358	7.28969	8.73845	9.75507	6.75791	2.1179	5.02527	-1.67619	0.678677	0.503735			Low outliers below	4.59772	7.67248	6.12303	8.48602	7.01173	3.60739	5.56296	7.64428	4.55427	5.05211	4.30412
		Data Minus Outliers														Data Minus Outliers
		Sample	nc2	nc3	nc4	nc5	nc6	nc7	nc8	nc9	nc10	nc11	nc12			Sample	nc2	nc3	nc4	nc5	nc6	nc7	nc8	nc9	nc10	nc11	nc12
		1	15.6348	16.9184	12.427		15.6238	8.75458	4.77175	5.84278	4.04168	1.94905	0.692316			1	8.28537	8.49402	9.74266	8.55699	8.92664	12.0129	8.82633	12.0184	13.0121	8.59243	5.259
		2	15.7132	16.7106	18.059	13.3677		9.36204	8.14752		1.75453	0.752858	0.658012			2	9.31004	9.18371	12.1557	10.2467	10.2849	9.62253		10.2688	11.3		5.89559
		3	16.6103		14.457	13.5441	14.6159		4.75723	5.69118	1.86642		0.616884			3	8.06068	24.3777		10.8658	11.744		10.5429	13.3045	9.16149	10.9526	5.28056
		4		15.1207		18.7195	13.2763	8.27423	6.54099	5.51578	5.53179	1.48466				4	10.7438	9.57122	7.97044	11.4205	10.9505	8.4212	13.8628	10.4637		11.2309	5.11275
		5	18.15	15.7589	15.8519	16.4538	17.0547	9.2851	5.85319		1.57851	1.4409				5			9.85041	12.7086	9.37501	11.6304	11.0508	9.54692	9.62899	10.7966
		Avg	16.5271	16.1271	15.1987	15.5213	15.1427	8.91899	6.01414	5.68325	2.95459	1.40687	0.655737			Avg	9.09998	12.9067	9.92981	10.7597	10.2562	10.4218	11.0707	11.1205	10.7756	10.3931	5.38698
		StDev	1.16893	0.83966	2.36925	2.55902	1.59669	0.507635	1.41228	0.163647	1.75653	0.492916	0.0377677			StDev	1.22339	7.66034	1.71613	1.52981	1.14464	1.69644	2.09062	1.51732	1.75092	1.21383	0.347177
		P-value vs nc2		0.598496	0.353436	0.501461	0.211281	2.09066e-05	6.60877e-06	1.97978e-05	3.34246e-06	3.57903e-07	2.92621e-06			P-value vs nc2		0.36428	0.460963	0.122001	0.187161	0.253137	0.154823	0.0683067	0.167698	0.184099	0.00111152
								***	***	***	***	***	***														**
