# Supplementary material for: Compartmentalized oskar degradation in the germ plasm safeguards germline development
Source: eLife journal article supplement (doi:10.7554/elife.49988), 2020-01-07
Supplement: supp [file elife-49988-supp-v1.zip › elife_poa_e49988_Figure_6_source_data_2.xlsx]

## Sheet: Sheet1
Figure 6E
		% of localized oskar particles colocalized with DCP1														% of unlocalized oskar particles colocalized with DCP1
		Sample	nc2	nc3	nc4	nc5	nc6	nc7	nc8	nc9	nc10	nc11	nc12			Sample	nc2	nc3	nc4	nc5	nc6	nc7	nc8	nc9	nc10	nc11	nc12
		1	27.3301	20.7801	16.2117	28.8082	27.6441	28.8219	25.6164	31.645	40.7179	36.3708	42.9412			1	19.4785	20.0658	7.36842	25.2778	18.3158	15.5682	12.8165	17.0968	27.6074	24.6377	37.1429
		2	27.2118	22.1599	35.6098	24.1167	30.8162	25.5599	28.6732	33.8279	39.6913	39.8222	32.5501			2	25.9825	17.1761	23.4211	14.9398	9.01639	14.7516	14.7139	14.9733	30.3704	46.0396	22.6087
		3	27.0734	37.9406	23.1441	30.1829	39.3848	43.5938	16.973	38.4358	49.2345	72.1662	43.3735			3	25.6637	17.8322	30.109	25.7322	25.0784	21.4815	5.66038	29.2906	32.5843	34.0909	42.8571
		4	22.4026	28.4962	25.9324	35.6195	28.0969	37.9373	49.534	41.1262	47.9416	40.0791	44.5415			4	28.3293	19.0476	28.8783	24.2358	21.374	20	22.3587	21.9577	40.9207	40.0763	45.4082
		5	19.9626	23.9808	42.7928	37.7434	26.7464	36.4842	43.8918	52.8926	67.7686	63.7056	56.5996			5	18.1087	19.1441	20.9877	25	20.5674	24.569	30.2326	32.0158	46.1538	51.9231	57.5
		6	30.2632	13.909	32.345	30.6586	35.8065	32.153	39.1125	32.2892	27.2895	30.8155	36.7021			6	18.1087	11.9097	19.4645	14.3885	22.1041	20.5709	19.8824	15.9358	25.9136	25.5238	24.7706
		7	22.8166	19.1902	25.2591	35.8454	29.596	40.7035	42.8667	31.2803	30.5795	29.3937	28.6252			7	31.1953	15.9864	12.5358	23.7199	25.6778	20.1143	17.8304	19.2136	22.7813	27.0987	40.8638
		8				25.0703	36.5975	29.2707	33.641	38.3306	30.8241	32.0807	33.2888			8				24.2143	23.0207	14.9042	19.8795	20.4216	29.1223	32.4963	24.581
		9					42.5633	28.9895	40.4072	36.9231	30.9297	40.5309	45.4545			9					22.9131	15.4341	25.4986	20.6667	29.476	28.0164	28.5714
		Remove outliers based on interquartile range														Remove outliers based on interquartile range
		Max	30.2632	37.9406	42.7928	37.7434	42.5633	43.5938	49.534	52.8926	67.7686	72.1662	56.5996			Max	31.1953	20.0658	30.109	25.7322	25.6778	24.569	30.2326	32.0158	46.1538	51.9231	57.5
		Min	19.9626	13.909	16.2117	24.1167	26.7464	25.5599	16.973	31.2803	27.2895	29.3937	28.6252			Min	18.1087	11.9097	7.36842	14.3885	9.01639	14.7516	5.66038	14.9733	22.7813	24.6377	22.6087
		Q1	22.6096	19.9851	24.2016	27.8737	28.0969	28.9895	28.6732	32.2892	30.8241	32.0807	33.2888			Q1	18.7936	16.5813	16.0001	21.5248	20.5674	15.4341	14.7139	17.0968	27.6074	27.0987	24.7706
		Q3	27.2709	26.2385	33.9774	35.676	36.5975	37.9373	42.8667	38.4358	47.9416	40.5309	44.5415			Q3	27.1559	19.0959	26.1497	25.0694	23.0207	20.5709	22.3587	21.9577	32.5843	40.0763	42.8571
		IQR	4.66133	6.25339	9.7758	7.80223	8.50062	8.94773	14.1935	6.1466	17.1175	8.45016	11.2527			IQR	8.36233	2.51462	10.1495	3.5446	2.45333	5.13687	7.64483	4.8609	4.97691	12.9777	18.0865
		High outlier?	FALSE	TRUE	FALSE	FALSE	FALSE	FALSE	FALSE	TRUE	FALSE	TRUE	FALSE			High outlier?	FALSE	FALSE	FALSE	FALSE	FALSE	FALSE	FALSE	TRUE	TRUE	FALSE	FALSE
		Low outlier?	FALSE	FALSE	FALSE	FALSE	FALSE	FALSE	FALSE	FALSE	FALSE	FALSE	FALSE			Low outlier?	FALSE	TRUE	FALSE	TRUE	TRUE	FALSE	FALSE	FALSE	FALSE	FALSE	FALSE
		High outliers above	34.2629	35.6186	48.6411	47.3793	49.3484	51.3589	64.157	47.6557	73.6178	53.2061	61.4206			High outliers above	39.6994	22.8678	41.374	30.3863	26.7007	28.2762	33.826	29.249	40.0496	59.5428	69.9869
		Low outliers below	15.6176	10.605	9.53789	16.1704	15.3459	15.568	7.38293	23.0693	5.14781	19.4055	16.4097			Low outliers below	6.2501	12.8093	0.775857	16.208	16.8874	7.72879	3.24666	9.80543	20.142	7.63218	-2.35911
		Data Minus Outliers														Data Minus Outliers
		Sample	nc2	nc3	nc4	nc5	nc6	nc7	nc8	nc9	nc10	nc11	nc12			Sample	nc2	nc3	nc4	nc5	nc6	nc7	nc8	nc9	nc10	nc11	nc12
		1	27.3301	20.7801	16.2117	28.8082	27.6441	28.8219	25.6164	31.645	40.7179	36.3708	42.9412			1	19.4785	20.0658	7.36842	25.2778	18.3158	15.5682	12.8165	17.0968	27.6074	24.6377	37.1429
		2	27.2118	22.1599	35.6098	24.1167	30.8162	25.5599	28.6732	33.8279	39.6913	39.8222	32.5501			2	25.9825	17.1761	23.4211			14.7516	14.7139	14.9733	30.3704	46.0396	22.6087
		3	27.0734		23.1441	30.1829	39.3848	43.5938	16.973	38.4358	49.2345		43.3735			3	25.6637	17.8322	30.109	25.7322	25.0784	21.4815	5.66038		32.5843	34.0909	42.8571
		4	22.4026	28.4962	25.9324	35.6195	28.0969	37.9373	49.534	41.1262	47.9416	40.0791	44.5415			4	28.3293	19.0476	28.8783	24.2358	21.374	20	22.3587	21.9577	40.9207	40.0763	45.4082
		5	19.9626	23.9808	42.7928	37.7434	26.7464	36.4842	43.8918		67.7686		56.5996			5	18.1087	19.1441	20.9877	25	20.5674	24.569	30.2326	32.0158		51.9231	57.5
		6	30.2632	13.909	32.345	30.6586	35.8065	32.153	39.1125	32.2892	27.2895	30.8155	36.7021			6	18.1087		19.4645		22.1041	20.5709	19.8824	15.9358	25.9136	25.5238	24.7706
		7	22.8166	19.1902	25.2591	35.8454	29.596	40.7035	42.8667	31.2803	30.5795	29.3937	28.6252			7	31.1953	15.9864	12.5358	23.7199	25.6778	20.1143	17.8304	19.2136	22.7813	27.0987	40.8638
		8				25.0703	36.5975	29.2707	33.641	38.3306	30.8241	32.0807	33.2888			8				24.2143	23.0207	14.9042	19.8795	20.4216	29.1223	32.4963	24.581
		9					42.5633	28.9895	40.4072	36.9231	30.9297	40.5309	45.4545			9					22.9131	15.4341	25.4986	20.6667	29.476	28.0164	28.5714
		Avg	25.2943	21.4194	28.7564	31.0056	33.028	33.7238	35.6351	35.4823	40.553	35.5847	40.4529			Avg	23.8381	18.2087	20.395	24.6967	22.3814	18.5993	18.7637	20.2852	29.847	34.4336	36.0337
		StDev	3.61949	4.87802	8.81232	5.04862	5.71428	6.19371	10.3054	3.70481	12.9135	4.7713	8.55066			StDev	5.274	1.49494	8.24783	0.761743	2.38277	3.53117	7.21676	5.33207	5.3648	9.66061	11.799
		P-value vs nc2		0.128548	0.35528	0.0275157	0.00760561	0.00658108	0.0244996	0.000127518	0.00928674	0.0006707	0.000641689			P-value vs nc2		0.0287345	0.370442	0.701979	0.492667	0.0319512	0.141158	0.218193	0.0481362	0.0208633	0.0240183
						*	**	**	*	***	**	*	***												*	*	*
																									(asterisks indicate values that are significantly higher than nc2)
