# Supplementary material for: Compartmentalized oskar degradation in the germ plasm safeguards germline development
Source: eLife journal article supplement (doi:10.7554/elife.49988), 2020-01-07
Supplement: supp [file elife-49988-supp-v1.zip › elife_poa_e49988_Figure_7_figure_supplement_1_source_data_1.xlsx]

## Sheet: Sheet1
Figure 7 - supplement 1
											Normalized to avg at 0-45min
		Fertilized					Unfertilized					Fertilized					Unfertilized
	Sample	0-45min	45-90min	90-135min		Sample	0-45min	45-90min	90-135min		Sample	0-45min	45-90min	90-135min		Sample	0-45min	45-90min	90-135min
	1	464646	352543	31708.1		1	146702	81841.3	2557.56		1	0.934366	0.708937	0.0637625		1	1.07089	0.597425	0.0186696
	2	463734	338363	62185.7		2	127164	124340	11725.6		2	0.932532	0.680421	0.12505		2	0.928269		0.0855945
	3	532960	331032	5000.69		3	137105	89564.8	23146.9		3	1.07174	0.665678	0.010056		3	1.00084	0.653805	0.168967
	4	541293	305683	92.741		4		89165.8			4	1.0885	0.614705	0.000186495		4		0.650892
	5	497532	330815	804.206		5		91113.1			5	1.0005	0.665242	0.00161719		5		0.665107
	6	503733	354637	27494.6		6		72283.3			6	1.01297	0.713147	0.0552895		6		0.527654
	7	477093	317126	2384.34		7		72511.2			7	0.959397	0.637716	0.00479473		7		0.529317
	8		342541	6281.57		8		79096.5			8		0.688823	0.0126317		8		0.577389
	9		301068	7917.65		9		92137.6			9		0.605423	0.0159218		9		0.672586
	10		320548								10		0.644598
	Remove outliers based on interquartile range					Remove outliers based on interquartile range
	Max	541293	354637	62185.7		Max	146702	124340	23146.9		Average intensity relative to 0-45 min time point
	Min	463734	301068	92.741		Min	127164	72283.3	2557.56		Sample		Prebudding	Budding	Postbudding
											Fertilized	Mean	1	0.662469	0.0321456
	Q1	470870	317982	2384.34		Q1	132134	79096.5	7141.58			StDev	0.0627898	0.0368631	0.041833
	Q3	518347	341497	27494.6		Q3	141903	91113.1	17436.2		Unfertilized	Mean	1	0.609272	0.0910772
	IQR	47477.5	23514.6	25110.3		IQR	9768.98	12016.5	10294.6			StDev	0.0713153	0.0598246	0.0752987
	High outlier?	FALSE	FALSE	FALSE		High outlier?	FALSE	TRUE	FALSE		Ttests
	Low outlier?	FALSE	FALSE	FALSE		Low outlier?	FALSE	FALSE	FALSE		Array1	Array2	p-value
											fertilized 0-45min	unfertilized 0-45min	1	n.s.
	Above	589563	376768	65160.1		Above	156557	109138	32878.2		fertilized 45-90min	unfertilized 45-90min	0.0336667	n.s.
	Below	399653	282710	-35281.1		Below	117481	61071.7	-8300.4		fertilized 95-135min	unfertilized 90-135min	0.109602	n.s.
	Avg	497285	329436	15985.5		Data minus outliers
	StDev	31224.4	18331.5	20802.9		Sample	prebudding	budding	postbudding
						1	146702	81841.3	2557.56
						2	127164		11725.6
						3	137105	89564.8	23146.9
						4		89165.8
						5		91113.1
						6		72283.3
						7		72511.2
						8		79096.5
						9		92137.6
						Avg	136990	83464.2	12476.7
						StDev	9769.49	8195.38	10315.2
