# Supplementary material for: Compartmentalized oskar degradation in the germ plasm safeguards germline development
Source: eLife journal article supplement (doi:10.7554/elife.49988), 2020-01-07
Supplement: supp [file elife-49988-supp-v1.zip › elife_poa_e49988_Figure_7_source_data_1.xlsx]

## Sheet: Sheet1
Figure 7D
	Genotype	wt																		Brat11 GLCs																		AubHN/AubQC
	Experiment	Rep 1						Rep 2						Rep 3						Rep 1						Rep 2						Rep 3						Rep 1						Rep 2
	Stage	0-45min		45-90min		90-135min		0-45min		45-90min		90-135min		0-45min		45-90min		90-135min		0-45min		45-90min		90-135min		0-45min		45-90min		90-135min		0-45min		45-90min		90-135min		0-45min		45-90min		90-135min		0-45min		45-90min		90-135min
		Series	Int Den	Series	Int Den	Series	Int Den	Series	Int Den	Series	Int Den	Series	Int Den	Series	Int Den	Series	Int Den	Series	Int Den	Series	Int Den	Series	Int Den	Series	Int Den	Series	Int Den	Series	Int Den	Series	Int Den	Series	Int Den	Series	Int Den	Series	Int Den	Series	Int Den	Series	Int Den	Series	Int Den	Series	Int Den	Series	Int Den	Series	Int Den
		8	350287	36	135594	63	3682.2	4	464646	19	352543	39	31708.1	7	127072	22	61123.4	38	1883.65	51	815882	66	526546	80	688.393	5	132655	20	48579.5	43	2196.36	10	204811	21	174961	27	257.58	22	233111	48	184502	77	194309	29	18941.3	60	54291.5	89	18272.2
		10	257087	38	160721	65	10360.7	6	463734	21	338363	41	62185.7	9	129930	24	60425.2	40	1254.94	54	989829	68	919617	82	7294.56	7	119090	26	61061.2	45	3098.41	12	166771	23	114566	29	2919.11	24	40961.3	50	173807	85	158998	48	44834.2	66	15184.5	5	3266.72
		12	305460	41	177499	67	4758.55	9	532960	23	331032	43	5000.69	11	86742.5	26	80588	43	1384.65	56	948763	70	375534	84	2834.93	9	108268	28	54043.1	47	3217.21	14	188235	25	146785	32	3427.4	27	237479	53	254140	88	332599	54	47156.4	72	24850.4	11	4271.82
		14	247589	43	197528	70	779.507	11	541293	25	454606	45	92.741	14	92619.9	28	73003.3	45	818.172	58	1.21264e+06	72	156106	86	1743.45	11	101722	32	38370.1	49	3278.8	18a	130878			34	797.563	29	305574	57	269735	90	59692.9			79	39767.3	23	18097.4
		20	414791	45	172018	72	10766.8	13	497532	27	305683	47	804.206	16	88116.5	30	19136.1	47	1385.52	60	802587	74	109287	88	6082.52	16	125222	34	144965	53	1764.33	18b	173707					31	344609	61	154051	93	140572					35	16878.1
								15	503733	29	330815	49	27494.6	18	162583	32	66827.5	49	3068.16	64	744384	76	329193			18	107662	36	61013.2	55	991.239							34	205216
								17	477093	31	354637	51	2384.34	20	166279	34	58992.6					78	315314					38	35628.6	57	3470.63
										33	317126	54	6281.57			36	43284.8											41	52917.9	59	1433.32
										35	342541	57	7917.65
										37	301068
		Remove outliers based on interquartile range
		Max	414791	Max	197528	Max	10766.8
		Min	247589	Min	135594	Min	779.507
		Q1	257087	Q1	160721	Q1	3682.2	Q1	470870	Q1	320548	Q1	2384.34	Q1	90368.2	Q1	55065.6	Q1	1287.37	Q1	805910	Q1	235710	Q1	1743.45	Q1	107813	Q1	46027.2	Q1	1681.57	Q1	166771	Q1	130676	Q1	662.567	Q1	212189	Q1	173807	Q1	140572	Q1	31887.7	Q1	22433.9	Q1	4271.82
		Q3	350287	Q3	177499	Q3	10360.7	Q3	518347	Q3	350043	Q3	27494.6	Q3	146257	Q3	68371.4	Q3	1759.12	Q3	979562	Q3	451040	Q3	6082.52	Q3	123689	Q3	61025.2	Q3	3232.61	Q3	188235	Q3	160873	Q3	3046.18	Q3	288550	Q3	254140	Q3	194309	Q3	45995.3	Q3	43398.3	Q3	18097.4
		IQR	93200	IQR	16778.7	IQR	6678.49	IQR	47477.5	IQR	29494.3	IQR	25110.3	IQR	55888.3	IQR	13305.8	IQR	471.749	IQR	173652	IQR	215330	IQR	4339.06	IQR	15875.6	IQR	14998	IQR	1551.04	IQR	21463.8	IQR	30197.3	IQR	2383.61	IQR	76360.5	IQR	80333.3	IQR	53737.6	IQR	14107.6	IQR	20964.4	IQR	13825.5
		High outlier?	FALSE	High outlier?	FALSE	High outlier?	FALSE	High outlier?	FALSE	High outlier?	TRUE	High outlier?	FALSE	High outlier?	FALSE	High outlier?	FALSE	High outlier?	TRUE	High outlier?	FALSE	High outlier?	TRUE	High outlier?	FALSE	High outlier?	FALSE	High outlier?	TRUE	High outlier?	FALSE	High outlier?	FALSE	High outlier?	FALSE	High outlier?	FALSE	High outlier?	FALSE	High outlier?	FALSE	High outlier?	TRUE	High outlier?	FALSE	High outlier?	FALSE	High outlier?	FALSE
		Low outler?	FALSE	Low outler?	FALSE	Low outler?	FALSE	Low outler?	FALSE	Low outler?	FALSE	Low outler?	FALSE	Low outler?	FALSE	Low outler?	TRUE	Low outler?	FALSE	Low outler?	FALSE	Low outler?	FALSE	Low outler?	FALSE	Low outler?	FALSE	Low outler?	FALSE	Low outler?	FALSE	Low outler?	TRUE	Low outler?	FALSE	Low outler?	FALSE	Low outler?	TRUE	Low outler?	FALSE	Low outler?	TRUE	Low outler?	FALSE	Low outler?	FALSE	Low outler?	FALSE
		Above	490087	Above	202667	Above	20378.4	Above	589563	Above	394284	Above	65160.1	Above	230089	Above	88330.1	Above	2466.74	Above	1.24004e+06	Above	774035	Above	12591.1	Above	147502	Above	83522.2	Above	5559.16	Above	220430	Above	206169	Above	6621.59	Above	403091	Above	374640	Above	274916	Above	67156.6	Above	74845	Above	38835.7
		Below	117287	Below	135553	Below	-6335.53	Below	399653	Below	276307	Below	-35281.1	Below	6535.73	Below	35107	Below	579.743	Below	545432	Below	-87285.1	Below	-4765.14	Below	84000	Below	23530.2	Below	-644.981	Below	134575	Below	85379.9	Below	-2912.85	Below	97648.5	Below	53306.8	Below	59965.1	Below	10726.4	Below	-9012.77	Below	-16466.5
		Data minus outliers
			350287		135594		3682.2		464646		352543		31708.1		127072		61123.4		1883.65	w/o outliers	815882		526546		688.393		132655		48579.5		2196.36		204811		174961		257.58	w/o outliers	233111		184502		194309		18941.3		54291.5		18272.2
			257087		160721		10360.7		463734		338363		62185.7		129930		60425.2		1254.94		989829				7294.56		119090		61061.2		3098.41		166771		114566		2919.11				173807		158998		44834.2		15184.5		3266.72
			305460		177499		4758.55		532960		331032		5000.69		86742.5		80588		1384.65		948763		375534		2834.93		108268		54043.1		3217.21		188235		146785		3427.4		237479		254140				47156.4		24850.4		4271.82
			247589		197528		779.507		541293				92.741		92619.9		73003.3		818.172		1.21264e+06		156106		1743.45		101722		38370.1		3278.8						797.563		305574		269735						39767.3		18097.4
			414791		172018		10766.8		497532		305683		804.206		88116.5				1385.52		802587		109287		6082.52		125222				1764.33		173707						344609		154051		140572						16878.1
									503733		330815		27494.6		162583		66827.5				744384		329193				107662		61013.2		991.239								205216
									477093		354637		2384.34		166279		58992.6						315314						35628.6		3470.63
											317126		6281.57				43284.8												52917.9		1433.32
											342541		7917.65
											301068
											320548
		Avg	315043	Avg	168672	Avg	6069.54	Avg	497285	Avg	329436	Avg	15985.5	Avg	121906	Avg	63463.5	Avg	1345.39	Avg	919014	Avg	301997	Avg	3728.77	Avg	115770	Avg	50230.5	Avg	2431.29	Avg	183381	Avg	145438	Avg	1850.41	Avg	265197	Avg	207247	Avg	164626	Avg	36977.3	Avg	33523.4	Avg	12157.2
		StDev	69268.8	StDev	22798.8	StDev	4355.47	StDev	31224.4	StDev	18331.5	StDev	20802.9	StDev	34035.6	StDev	11814.2	StDev	380.465	StDev	171350	StDev	151769	StDev	2838.98	StDev	11872.9	StDev	10099	StDev	958.493	StDev	16854.9	StDev	30219.9	StDev	1557.2	StDev	57732.3	StDev	51403.1	StDev	27307.4	StDev	15662.7	StDev	17144.8	StDev	7684.17
		Intensities relateive to 0-45 min time point
			wt				Brat11				AubQC/AubHN
			Prebudding	Budding	Postbudding		Prebudding	Budding	Postbudding		Prebudding	Budding	Postbudding
		Rep 1	1	0.535394	0.0192658		1	0.328609	0.00405736		1	0.781483	0.620768
		Rep 2	1	0.662469	0.0321456		1	0.433883	0.0210011		1	0.906594	0.328776
		Rep 3	1	0.520593	0.0110362		1	0.793091	0.0100905		1	0.860446	0.662508
		Average intensity relative to 0-45 min time point						TTESTS		p-values
		Genotype		Prebudding	Budding	Postbudding		array 1	array 2	45-90min	90-135min
		wt	Mean	1	0.572819	0.0208159		wt	Brat11	0.731708	0.31324
			SEM	0	0.0450284	0.00614284				ns	ns
		Brat11	Mean	1	0.518528	0.0117163		wt	AubHN/AubQC	0.00882702	0.0079758
			SEM	0	0.140605	0.00495832				**	**
		AubQC/AubHN	Mean	1	0.849508	0.537351
			SEM	0	0.0365282	0.104981
[truncated: 6 more columns]
