# Supplementary material for: Compartmentalized oskar degradation in the germ plasm safeguards germline development
Source: eLife journal article supplement (doi:10.7554/elife.49988), 2020-01-07
Supplement: supp [file elife-49988-supp-v1.zip › elife_poa_e49988_Figure_7_source_data_2.xlsx]

## Sheet: Sheet1
Figure 7G
	% of oskar particles colocalized with DCP1 in mnk aub mutants					% of oskar particles colocalized with DCP1 in wild type					Ttest
	Sample	0-45 min	45-90 min	90-135 min		Sample	0-45 min	45-90 min	90-135 min		Array 1	Array 2	p-value
	1	3.67647	23.4793	4.79902		1	9.67742	16.973	28.6252		mnk aub 0-45 min	WT 0-45 min	6.5053e-06	***
	2	12.5074	6.78308	8.84161		2	13.909	25.5599	29.3937		mnk aub 45-90 min	WT 45-90min	6.91076e-10	***
	3	9.37327	7.18504	5.89397		3	14.8796	25.6164	30.8155		mnk aub90-135 min	WT 90-135 min	2.54473e-08	***
	4	2.30781	7.8209	9.40355		4	16.2117	26.7464	32.0807
	5	8.32073	6.4663	9.13043		5	17.7794	27.2895	32.5501
						6	18.7135	27.6441	33.2888
	Remove outliers based on interquartile range					7	19.1902	28.0969	36.3708
						8	19.9626	28.6732	36.7021
	Max	12.5074	23.4793	9.40355		9	20.7801	28.8219	39.8222
	Min	2.30781	6.4663	4.79902		10	22.1599	28.9895	40.0791
						11	22.4026	29.2707	40.5309
	Q1	3.67647	6.78308	5.89397		12	22.8166	29.596	42.9412
	Q3	9.37327	7.8209	9.13043		13	23.1441	30.5795	43.3735
	IQR	5.6968	1.03782	3.23647		14	23.9808	30.8162	44.5415
						15	24.1167	30.8241	45.4545
	High outlier?	FALSE	TRUE	FALSE		16	25.0703	30.9297	56.5996
	Low outlier?	FALSE	FALSE	FALSE		17	25.2591	31.2803	72.1662
						18	25.9324	31.645
	Above	17.9185	9.37762	13.9851		19	27.0734	32.153
	Below	-4.86872	5.22635	1.03926		20	27.2118	32.2892
						21	27.3301	33.641
	Data minus outliers					22	28.4962	33.8279
	Sample	0-45 min	45-90 min	90-135 min		23	28.8082	35.8065
	1	3.67647		4.79902		24	30.1829	36.4842
	2	12.5074	6.78308	8.84161		25	30.2632	36.5975
	3	9.37327	7.18504	5.89397		26	30.6586	36.9231
	4	2.30781	7.8209	9.40355		27	32.345	37.9373
	5	8.32073	6.4663	9.13043		28	35.6098	38.3306
						29	35.6195	38.4358
	Avg	7.23714	7.06383	7.61371		30	35.8454	39.1125
	StDev	4.19791	0.584152	2.11493		31	37.7434	39.3848
						32	42.7928	39.6913
						33		40.4072
						34		40.7035
						35		40.7179
						36		41.1262
						37		42.5633
						38		42.8667
						39		43.5938
						40		43.8918
						41		47.9416
						42		49.2345
						43		49.534
						44		67.7686
						Max	42.7928	67.7686	72.1662
						Min	9.67742	16.973	28.6252
						Q1	20.5757	29.5147	32.5501
						Q3	30.203	40.4813	43.3735
						IQR	9.6273	10.9666	10.8234
						High outlier?	FALSE	TRUE	TRUE
						Low outlier?	FALSE	FALSE	FALSE
						Above	44.6439	56.9312	59.6086
						Below	6.13473	13.0648	16.315
						Data minus outliers
						Sample	0-45 min	45-90 min	90-135 min
						1	9.67742	16.973	28.6252
						2	13.909	25.5599	29.3937
						3	14.8796	25.6164	30.8155
						4	16.2117	26.7464	32.0807
						5	17.7794	27.2895	32.5501
						6	18.7135	27.6441	33.2888
						7	19.1902	28.0969	36.3708
						8	19.9626	28.6732	36.7021
						9	20.7801	28.8219	39.8222
						10	22.1599	28.9895	40.0791
						11	22.4026	29.2707	40.5309
						12	22.8166	29.596	42.9412
						13	23.1441	30.5795	43.3735
						14	23.9808	30.8162	44.5415
						15	24.1167	30.8241	45.4545
						16	25.0703	30.9297	56.5996
						17	25.2591	31.2803
						18	25.9324	31.645
						19	27.0734	32.153
						20	27.2118	32.2892
						21	27.3301	33.641
						22	28.4962	33.8279
						23	28.8082	35.8065
						24	30.1829	36.4842
						25	30.2632	36.5975
						26	30.6586	36.9231
						27	32.345	37.9373
						28	35.6098	38.3306
						29	35.6195	38.4358
						30	35.8454	39.1125
						31	37.7434	39.3848
						32	42.7928	39.6913
						33		40.4072
						34		40.7035
						35		40.7179
						36		41.1262
						37		42.5633
						38		42.8667
						39		43.5938
						40		43.8918
						41		47.9416
						42		49.2345
						43		49.534
						44
						Avg	25.4989	34.943	38.3231
						StDev	7.46537	7.08221	7.3703
