# Supplementary material for: Compartmentalized oskar degradation in the germ plasm safeguards germline development
Source: eLife journal article supplement (doi:10.7554/elife.49988), 2020-01-07
Supplement: supp [file elife-49988-supp-v1.zip › elife_poa_e49988_Figure_7_source_data_3.xlsx]

## Sheet: Sheet1
Figure 7H,I
	Sizes of oskar particles in wild type (number of transcripts)					Sizes of oskar particles in mnk aub mutants (number of transcripts)
		0-45min	45-90min	90-135min			0-45min	45-90min	90-135min
	x <= 2	22890	16235	3650		x <= 2	5088	3884	2521
	2 < x <=4	24696	14867	2228		2 < x <=4	7118	5348	3537
	4 < x <=8	25170	12235	709		4 < x <=8	5753	4047	2481
	8 < x <= 16	16317	7371	218		8 < x <= 16	2722	1780	917
	16 < x <= 32	6718	3090	43		16 < x <= 32	954	636	216
	32 < x	2503	1051	3		32 < x	221	141	21
	Total	98294	54849	6851		Total	21856	15836	9693
		0-45min	45-90min	90-135min			0-45min	45-90min	90-135min
		3.87647	2.01438	2.98469			28.0949	20.3091	5.50616
		3.24045	1.47077	1.75969			4.05917	5.20421	4.27416
		1.23008	2.20156	2.56202			7.87525	6.65752	3.12181
		4.00613	1.92225	1.00716			4.35277	12.0354	3.22486
		14.9505	13.4629	3.46563			6.98493	28.3802	11.8475
		5.87694	2.99848	1.22839			2.34735	9.94673	2.36896
		7.07355	2.0155	3.61388			3.14175	1.83642	2.55566
		2.19755	4.27893	1.42077			1.98199	26.7325	3.61166
		7.92928	16.2112	1.6669			13.1513	46.7578	3.02143
		8.4842	1.68351	2.41151			3.23474	9.20586	1.98015
		10.1528	5.48765	1.18878			1.6796	7.15075	4.3973
		90.4257	9.80334	2.45225			21.643	3.59838	7.22666
		3.71146	6.80464	2.17161			4.37546	8.22974	3.74148
		56.099	3.00318	2.12974			5.01319	15.1163	5.49076
		7.50071	7.66074	4.50504			2.09621	40.398	6.66721
		4.18058	1.35218	1.13673			4.38425	3.21217	2.23913
		2.56671	17.1406	1.45641			10.3756	7.58814	2.46064
		2.61905	9.94815	1.88644			5.8464	4.28238	5.53025
		41.7289	9.86745	2.63275			1.02943	2.55247	2.80193
		4.38095	4.49413	1.46547			2.88989	3.00382	2.55232
		18.959	1.66131	2.13483			5.29434	17.6926	4.38993
		1.13201	3.8362	1.91586			3.90614	7.20038	17.9352
		7.62848	1.37841	1.82589			2.63729	7.63415	9.23626
		1.89297	8.10818	2.0426			1.71475	11.7976	6.92352
		6.12636	10.793	1.92265			1.80188	7.09646	3.85324
		2.18105	6.08797	1.4649			18.1469	16.2744	2.90097
		3.09618	7.49485	3.2891			2.06985	11.7227	6.75421
		2.62612	2.81713	1.3987			1.71768	5.24816	1.36315
		3.71051	22.9185	2.5739			1.427	4.00061	9.97171
		4.16973	8.12297	5.56595			2.93308	8.51307	2.95451
		1.25507	3.22578	1.71499			3.79632	7.21227	2.84275
		4.95379	22.7751	1.4864			11.7536	19.2968	5.34622
		3.49552	15.8162	1.20802			3.98302	1.4621	3.8867
		1.03913	1.66064	1.97131			3.03925	23.8837	3.4825
		8.11032	1.21477	1.15483			5.39685	7.04683	9.41761
		1.11787	2.25783	1.35513			37.3489	10.5046	2.59247
		5.35879	1.5898	3.18895			4.51751	5.14941	1.50034
		1.42197	21.4323	1.05299			2.24045	6.38299	10.4863
		1.64498	2.5266	1.14974			5.13839	2.57522	4.19185
		1.24611	3.8687	9.41916			16.5017	11.656	10.3478
		1.22254	5.77279	1.32911			2.56114	5.84272	3.44101
		1.21594	1.74627	2.02563			3.31967	1.83642	3.7629
		2.42904	1.7586	1.0677			2.39786	9.44627	6.01943
		1.29844	2.81646	1.17464			12.1175	17.9661	9.40557
		1.09052	1.16299	1.55034			8.54299	3.90238	3.18605
		3.69778	1.69225	2.12804			1.56539	20.0486	2.16285
		2.74917	2.07199	7.98934			2.49305	1.68286	8.39709
		2.19613	1.21477	6.60875			2.42642	1.40161	1.65292
		1.85856	1.64405	1.9119			2.10573	3.23854	6.13185
		4.23291	3.2352	1.12428			1.94612	18.1108	12.2831
		5.65676	1.25512	2.43584			6.67742	1.45641	1.59135
		1.55823	5.04828	1.29968			2.1211	20.0713	3.27505
		2.68553	7.77574	2.35606			7.74419	6.11725	6.10576
		4.37247	5.33163	3.29532			1.6203	1.91241	4.19252
		7.50495	3.03322	2.42509			28.5057	5.92647	3.26501
		5.30316	6.40405	2.04034			1.82531	12.6078	10.3117
		7.39132	3.02246	1.03149			1.7045	8.7695	5.69152
		3.91136	1.55662	2.34305			3.57374	8.28506	3.41157
		4.28619	6.73694	2.32608			2.10792	4.47316	2.21705
		5.93776	4.14308	1.85022			4.94876	3.19615	5.6159
		3.00283	3.634	4.60462			1.23884	5.10546	1.95339
		2.50589	8.42717	1.07675			6.05214	10.6814	2.8655
		4.38614	1.28763	1.42416			5.84054	15.2766	3.04886
		3.12871	5.06419	2.08108			9.14923	26.5996	7.11424
		2.27157	5.00232	1.2018			5.89838	3.67593	2.87019
		2.63696	6.2422	2.99997			12.6278	3.29593	2.27795
		11.5592	1.907	4.02692			1.40504	18.3548	2.62459
		8.87364	1.5963	2.15633			1.5566	2.85854	6.07096
		4.62753	3.07739	2.28873			1.67009	3.43656	8.47806
		8.46487	1.77721	2.25874			25.9519	1.80488	8.10933
		1.24705	1.61222	1.03035			3.77801	5.03256	9.87468
		1.99246	5.66407	1.92208			1.10851	3.08706	2.79457
		2.95379	2.92204	1.29176			1.24323	13.4133	1.44814
		1.29373	2.25872	1.40436			9.79867	1.34215	2.72832
		6.59972	5.74925	1.24989			4.85431	7.4015	2.60585
		5.52758	3.59768	1.97697			1.82384	6.60789	8.72499
		1.19708	2.90141	1.76931			11.9644	8.47481	1.87241
		2.0462	5.87299	1.29402			1.17441	4.13142	1.55321
		5.02074	4.12493	1.17351			16.4373	9.64583	6.63241
		1.71381	1.69023	2.089			31.8239	5.34949	6.75956
		1.78124	1.26834	1.8242			6.68913	4.22448	2.25854
		1.07496	6.06533	3.80682			2.47914	8.52599	1.44413
		2.37954	1.3477	2.29269			1.54708	4.35115	4.71985
		1.40217	4.91669	2.53373			3.63963	8.48308	2.0725
		3.79538	1.05808	3.19065			2.52307	4.36666	1.41067
		10.909	1.9404	1.32458			1.98199	1.71854	2.49477
		7.20085	5.78624	2.36568			5.77245	1.35456	2.46465
		6.03772	5.35853	4.85188			2.80349	26.0609	1.10752
		6.80292	5.53674	2.23215			1.22639	4.30099	2.65203
		2.11457	4.4011	1.92435			10.4693	10.2326	2.43722
		8.29043	4.93731	2.21687			1.64592	9.22706	8.37835
		3.94625	5.72683	6.01803			2.93308	8.52186	1.18849
		2.79255	4.58021	1.21764			2.44399	6.45227	1.1276
		5.27911	1.63957	2.44377			1.5976	9.20896	1.94469
		5.76615	6.07519	1.17577			1.54781	9.35269	4.27818
		7.72418	3.21009	2.20612			2.45571	20.9497	8.65205
		2.88496	6.79791	3.52731			1.48924	19.3242	5.76982
		9.405	12.1369	1.01338			2.26534	2.92782	3.39885
		1.06695	25.0827	1.40492			3.23694	11.5458	4.15103
		11.5606	4.58537	1.01225			3.6572	14.5528	2.13072
		3.74917	3.96622	7.12081			1.45702	15.701	1.24471
		1.90099	2.97942	1.6884			2.14893	37.7308	2.07384
		2.48609	3.55016	1.39644			3.51443	4.31392	2.12269
		1.75059	1.95901	1.39531			10.7856	8.9639	2.9351
		3.71853	5.84699	1.02922			2.14161	7.62433	1.11756
		6.49081	4.50018	1.84343			4.92313	12.0215	3.69196
		6.57096	6.65422	1.24763			2.79617	1.28063	3.68862
		4.2909	5.07069	1.7761			11.7763	3.80208	1.78743
		3.35361	1.29704	2.39001			2.14819	3.49084	2.3877
		1.2381	4.00791	1.50168			16.2367	3.22096	13.0226
		2.14663	6.86696	1.98715			11.8561	17.341	1.66697
		1.88307	5.86492	4.40206			1.81066	2.81046	3.085
		8.08534	2.68442	6.63025			11.3802	2.10526	6.61836
		4.86657	3.52281	3.72704			3.92298	2.00496	3.82112
		2.01744	2.08297	3.155			2.43814	1.77127	1.30226
		2.78312	1.25333	3.09842			19.7877	2.08768	1.69775
		11.4719	3.52505	2.49526			3.23767	1.80333	1.97212
		8.75719	3.52707	4.30757			4.74301	3.9241	8.0665
		1.10231	3.07783	1.19331			2.11891	6.77126	2.74103
		9.44224	4.90885	1.6454			7.64535	11.7273	1.26344
		1.59736	7.68854	1.52997			17.3547	3.85223	4.09348
		1.14286	6.73963	1.09938			1.9322	5.62454	2.06314
		4.124	2.09149	1.77893			6.479	7.23605	4.20122
		1.28996	3.37531	1.2895			3.89589	22.7205	2.42116
		1.12871	4.69857	2.16708			8.52835	3.4712	5.09995
		1.68364	6.31483	1.13956			7.89575	8.10463	4.054
		1.74163	4.0579	1.13956			1.23664	2.53541	1.20857
		1.42197	7.97861	1.25611			3.84976	8.76588	5.99534
		1.16879	8.66367	2.36059			11.0968	5.52837	3.64913
		3.83923	5.60242	2.32947			3.6777	1.04953	1.8336
		1.97596	6.45986	1.65954			1.76307	8.11497	2.87353
		3.16643	4.93081	2.59541			1.23518	5.22024	3.526
		2.91655	1.44835	1.56449			4.26051	4.02285	5.15081
		1.56011	3.3632	1.89323			4.97438	6.6477	1.31966
		1.21782	9.18845	1.34325			5.50081	4.94467	2.97793
		7.02263	6.81226	1.61428			4.47724	10.4829	3.81844
		5.67987	6.41884	1.50621			2.70099	5.17371	2.55165
		1.1537	4.11775	1.70311			10.9709	4.72339	6.11713
		4.03395	5.62461	6.25568			2.38908	5.56611	7.66097
		4.88072	5.93307	1.2182			6.86119	4.85833	1.63217
		3.80245	5.05657	1.3359			11.0858	7.87663	3.10842
		6.12777	7.53274	1.06091			2.87012	5.16233	6.04352
		8.04055	1.35062	1.07053			4.71885	7.1037	2.12537
		7.66384	3.95411	3.37284			2.36053	3.1036	3.14121
		2.31919	6.09896	1.20689			3.95373	2.40512	3.91748
		7.5686	2.64676	1.8457			6.42482	2.42425	3.16597
		8.67232	2.01303	1.38738			6.06166	4.20535	2.81598
		7.92173	7.5435	2.32891			6.95491	15.139	2.96655
		5.28807	4.72054	3.30211			3.13223	7.59796	2.35357
		2.28713	1.15559	1.72688			5.98624	8.47429	4.86908
		4.50212	1.15581	1.65219			2.16577	7.13679	3.71405
		1.8199	5.99763	2.59484			2.88915	4.14744	2.27059
		5.65677	1.76555	5.26493			2.37371	2.33429	2.35691
		13.4625	3.17983	1.48357			5.05419	5.57025	2.86015
		2.25931	5.04267	4.47505			5.03588	3.24113	3.29981
		4.75766	1.37572	2.12917			2.07498	3.8786	1.16909
		4.98067	6.37289	1.15879			2.28951	5.21972	3.52466
		2.66431	1.40868	1.51979			3.98595	7.9366	3.99979
		2.04008	1.14214	1.80439			2.98214	2.44804	7.13364
		6.52899	1.04888	1.44623			2.56114	3.27267	2.96053
		7.59736	6.6392	2.58465			7.96018	1.39747	2.07652
		5.09807	3.00924	1.34665			1.77552	3.94323	3.68795
		3.85761	9.20122	2.37474			4.00059	2.83011	4.55456
		1.43423	2.23003	1.52657			6.76454	9.347	1.24471
		1.69118	4.53605	1.23065			1.46215	6.55722	1.3143
		1.98303	2.13722	1.31326			4.57974	1.70148	2.17422
		3.02829	1.90207	1.0428			1.58296	2.26605	4.13229
		2.93777	1.48781	1.57184			1.28789	1.30855	2.03101
		4.16784	3.60777	1.00093			1.5588	2.21435	2.2746
		5.98586	3.18252	1.60409			2.74858	1.15293	3.46711
		1.01179	1.52704	2.08051			2.25509	3.71729	3.5347
		1.66242	5.44349	1.62672			1.60419	8.90082	1.01517
		3.53701	1.72812	2.00186			2.17821	8.11135	2.29133
		1.20934	3.82611	1.98941			1.09606	2.17351	1.73924
		5.63272	12.7857	2.02789			1.31498	1.48537	1.29557
		1.03536	6.16396	1.50055			1.12608	1.03867	2.55901
		3.50401	4.34708	1.1124			2.47401	5.46426	2.13139
		11.5592	1.09955	1.24989			1.18905	1.50191	1.5512
		1.11693	4.19173	1.18708			1.1561	2.95264	1.57529
		2.98633	7.57421	1.49149			7.56701	2.63881	2.42049
		3.72702	3.36813	1.21198			5.98698	5.1034	3.33595
		5.1801	1.59384	2.14671			3.03046	9.00474	1.18916
		2.98161	1.90386	1.19727			4.21951	3.62372	1.94803
		5.78501	8.14202	2.70347			13.5906	3.64388	5.3141
		5.1504	1.0648	3.2178			2.21482	6.44141	1.48428
		1.83074	3.91264	1.311			4.25612	3.64595	4.75398
		5.42291	1.70929	5.24626			3.68722	1.00868	5.31343
		13.4488	6.04807	2.22196			8.46904	6.12294	2.66474
		4.23951	2.17869	1.14012			15.8925	3.51359	1.91859
		1.53418	2.58063	1.21707			2.30488	4.27618	1.13897
		11.4927	4.01306	1.1554			1.52292	2.27743	2.48072
		3.76756	1.21948	3.08314			5.91596	1.65701	1.14634
		2.54691	2.00743	1.99224			11.0214	7.55557	1.50235
		5.09712	3.50286	1.02243			2.03983	2.5411	5.53761
		1.20509	2.92787	2.00865			3.92445	7.45733	2.49878
		3.11457	1.51157	3.79437			2.24045	2.83269	3.49455
		3.45073	7.14941	2.291			7.02447	1.22169	2.00224
		10.0698	2.46765	1.45698			1.5588	5.22592	1.32635
		4.9736	1.9422	1.8887			6.44751	3.80674	2.99667
		2.10655	4.14062	1.57976			6.0126	5.48753	1.09882
		1.08157	9.00777	2.26214			8.40608	15.5077	3.08701
		2.60302	4.76358	1.85022			13.8674	3.17237	2.52622
		2.41678	6.93869	1.49432			2.76249	7.63105	3.791
		2.5752	5.79184	1.13899			2.15918	10.1887	1.61611
		3.98868	2.73082	1.93453			14.0123	2.15799	5.72632
		7.31825	5.54615	1.82137			2.47328	8.05345	1.58867
		2.45214	4.59119	2.1105			4.65076	9.48298	1.01651
		3.71947	2.035	1.08241			1.67448	4.87126	3.43566
		1.70344	5.31929	1.16332			7.43741	3.51721	1.12559
		4.52522	8.81902	1.40832			6.92708	3.54978	4.34443
		5.76992	2.08432	1.45641			2.45864	6.29148	1.23534
		4.20934	3.87722	1.19784			8.80291	4.7632	2.34821
		3.63743	2.32754	1.12145			2.68488	8.7633	1.45283
		1.31872	4.11708	2.94508			8.89663	4.2524	2.82803
		4.09524	4.51027	1.02866			2.89135	3.15169	1.81888
		1.98538	1.74336	1.19557			1.06092	5.37638	2.84476
		6.47949	1.47884	1.75913			1.66496	5.56405	1.28419
		4.19707	5.96916	1.27479			6.95344	3.75245	1.60273
		5.30504	7.76318	1.59787			2.82253	2.49715	1.33036
		1.05328	3.16795	2.36512			2.93455	4.82111	3.85725
		2.1966	1.10336	3.40113			3.88198	5.58628	1.58265
		1.62565	4.21549	1.62276			3.5525	9.28754	1.53915
		2.01132	5.16395	1.90511			2.98287	3.46551	1.00246
		1.41018	3.21884	6.80113			2.89062	1.46986	1.33906
		1.529	5.14064	3.70441			6.94027	5.93164	1.83293
		3.05422	5.94002	1.1967			5.29873	1.82504	1.62883
		1.26733	21.4576	2.08447			5.99357	1.02368	5.55501
		6.59783	4.37218	3.1069			1.61737	9.35372	7.67636
		6.65347	3.43516	2.16086			7.01788	3.90807	2.86216
		2.7091	4.94068	1.07732			7.34296	6.28528	9.05022
		2.8529	1.4367	1.45868			2.54577	1.71854	3.15995
		9.1669	1.00114	2.58748			5.30606	2.36428	3.54608
		12.5153	9.77846	1.5311			10.8347	3.39364	6.01943
		4.07685	6.5325	1.22726			2.72954	4.89607	6.19744
		8.2942	4.46118	1.3093			1.63055	1.50812	2.9806
		4.00047	3.32061	1.46716			1.42993	15.2626	4.88246
		3.57567	10.1459	1.00376			3.41778	3.48205	4.69977
		4.52947	4.10475	1.3574			3.86001	3.28404	5.93243
		4.46205	11.1443	1.18312			2.10207	1.55361	2.37632
		2.59406	1.73776	2.85568			3.532	5.87374	3.61567
		4.29703	3.2899	1.49093			2.2075	2.75565	4.40666
		4.471	1.63217	1.91416			2.82985	2.47647	3.86528
		6.0066	1.12376	1.86041			3.12784	4.17278	4.04128
		1.76332	1.23696	2.10428			1.68985	9.55173	3.80773
		1.27628	14.3634	3.16518			11.725	4.6417	2.18761
		2.47808	1.16187	1.66237			2.78006	2.10785	3.09972
		1.04008	1.05427	1.05242			3.15054	1.28994	3.74884
		8.36822	2.73912	1.47282			6.59029	3.73797	5.67948
		2.82508	1.44185	1.38512			16.047	3.11136	3.42094
		9.52145	1.55506	1.11127			2.46303	4.50056	4.40332
		7.50212	1.97044	1.78006			5.47519	5.94974	2.90833
		1.68553	3.60441	1.3308			2.49671	4.22293	4.12694
		2.66289	7.16958	1.6222			4.333	1.64202	3.49522
		3.44177	3.36208	1.07958			4.29419	1.34991	1.56927
		1.36257	1.62298	1.75913			1.386	9.80352	3.53269
		1.93022	2.59094	2.08334			2.95432	7.97331	4.33908
		1.31966	6.82078	1.66633			1.68546	1.18188	7.06538
		1.77935	7.42155	1.47961			1.21907	5.77292	1.53046
		8.56907	4.74812	1.6652			1.43359	1.4073	3.26434
		2.63036	4.24127	1.10844			1.02431	2.17247	2.84409
		1.9967	1.1807	1.38965			1.32963	2.38134	3.75955
		1.62848	2.06437	1.28667			2.21629	2.56488	1.27148
		2.94342	2.08297	1.42982			1.7865	7.1249	5.99534
		4.58793	1.20468	1.01734			2.00542	6.03039	2.59448
		11.7011	1.63957	1.599			1.94685	2.92937	1.58466
		4.93541	1.22194	1.10278			1.61517	6.72163	3.19809
		7.0198	1.49251	1.49376			5.87715	1.003	2.34754
		2.56341	3.75191	1.87342			4.95388	4.97052	1.39728
		1.42999	1.43199	1.40096			8.33286	3.80828	3.26836
		5.35785	6.5029	2.32551			2.56993	4.83559	6.34801
		2.91278	2.96418	2.71196			13.4398	1.01592	2.82
		8.7553	6.01018	1.88247			5.22991	1.49829	2.21237
		5.11268	1.98882	1.70311			8.84684	3.14186	1.68972
		4.06129	1.91686	2.28138			6.04775	11.0418	3.15058
		3.2546	2.16009	1.22669			18.1747	3.44948	4.71383
		4.12871	1.1603	1.2878			1.87217	5.07806	3.68995
		1.92692	14.9191	1.94924			2.32904	2.599	3.73947
		5.5587	4.18187	1.15427			3.89882	6.90465	4.31431
		7.66384	1.67611	2.73573			8.00631	8.79018	4.08947
		4.35832	4.9492	1.94132			4.2466	3.34039	1.50369
		7.12777	5.24173	2.3125			1.62982	4.18674	5.63866
		2.67091	1.31923	1.42756			2.70684	3.98821	3.83718
		1.02782	1.71534	1.22782			4.40475	5.64729	3.99444
		2.33758	2.69316	2.665			9.40403	4.06886	4.47961
		4.22348	2.83551	1.94868			11.4695	12.6031	5.02969
		4.4446	5.39215	1.13673			1.73159	2.74635	2.24583
		3.50542	1.87921	2.12861			4.918	7.64915	3.4999
		2.0528	5.89025	2.44037			4.47431	7.20762	3.50592
		2.32909	4.8268	1.61824			6.53318	9.36458	4.99623
		4.43706	3.70439	1.22047			6.17148	6.15551	6.86596
		1.95332	5.65398	1.16219			2.76029	10.1577	1.38858
		7.13107	2.72611	2.49526			3.04584	9.48556	5.14144
		2.35691	1.53399	1.2895			5.06297	1.58929	7.75332
		2.54031	2.08701	1.58825			1.04408	1.55671	1.48629
		7.2876	1.00226	1.71273			5.23943	2.06338	4.19921
		1.31872	2.61515	1.05072			2.82619	7.80115	2.32278
		2.21405	4.34259	2.21631			1.05286	7.94436	1.32903
		2.87176	5.12763	1.68218			3.71797	1.74284	2.24181
		7.28949	4.88755	2.3968			3.57886	4.96173	4.65694
		8.36209	4.94068	2.53769			6.25861	2.66311	2.85279
		6.49505	8.63991	1.00942			1.62762	5.46788	2.77918
		4.58604	1.93861	3.90527			1.77259	1.53138	2.93108
		1.87459	6.91784	3.09672			1.6386	7.675	3.69464
		4.21358	1.35801	1.74838			2.45498	1.72009	4.50771
		4.40924	1.53354	9.40672			1.67594	11.0082	1.76066
		1.47242	1.14304	1.0677			11.5742	4.16451	2.66742
		5.79962	3.15629	1.46207			1.40431	1.63737	1.72519
		1.76285	2.19439	2.54222			3.76117	7.40874	7.32369
		6.32532	5.40896	2.63841			6.91391	6.22582	8.80731
		5.54408	1.83079	1.49546			1.65325	1.40264	4.62616
		2.10702	2.20828	1.43718			1.54488	3.90032	7.06405
		6.95474	1.64024	2.36002			7.68855	1.27443	1.99822
		1.11598	1.14774	2.01884			4.10456	2.65484	14.1529
		1.36068	3.29842	4.68214			1.65252	3.54461	5.88559
		6.82225	1.9561	7.16212			3.44927	3.11032	3.91681
		3.47949	8.15749	3.51486			7.41471	7.70291	5.82068
		6.5719	3.87072	2.52468			5.31557	6.07072	2.04239
		8.25507	5.83645	2.09296			1.21321	3.25095	1.93465
		7.95002	5.43967	2.70178			1.59174	8.20493	9.79437
		4.42857	3.05362	1.66294			2.51428	4.29272	1.10551
		3.85054	3.13208	1.44397			3.07366	3.23492	2.66207
		1.9208	3.00767	1.6635			2.04569	5.60437	1.49231
		1.21216	3.88619	1.8672			8.31309	2.51628	4.61612
		7.48562	1.07377	2.3985			7.41398	1.00506	3.74416
		4.27251	8.10369	1.92152			1.0697	5.68141	2.69285
		1.93635	2.00855	3.68517			2.45571	3.73229	3.03079
		2.06271	2.55485	1.61315			1.57271	3.02553	4.48964
		1.74352	1.02826	1.49998			2.06692	2.16368	3.20211
		2.01273	2.17219	1.80213			2.54869	9.65049	5.76246
		3.25177	4.60465	1.1769			4.07454	2.48681	3.2001
		3.24752	2.52078	1.0196			2.17895	2.38858	6.04687
		9.58699	2.09508	1.24706			3.97423	4.0611	14.0304
		9.48279	1.74269	1.17577			2.14014	4.68255	2.49343
		1.11221	3.78553	1.21764			1.4314	1.69837	3.65248
		2.24705	9.7204	1.60409			1.93953	3.44224	3.42495
		2.40924	1.68619	1.73989			1.68619	2.18126	1.321
		4.55115	2.22174	1.52601			2.52526	3.05656	4.51374
		5.4611	3.78195	1.23461			1.643	8.79432	2.04574
		1.51862	4.43966	1.26064			2.65779	5.8117	3.57151
		4.35644	1.58151	1.45472			3.04364	1.11157	4.96812
		4.7289	5.71899	4.55483			2.25656	2.60004	2.25988
		1.3371	1.02669	2.8438			6.19199	3.87757	2.07116
		1.81471	1.26812	1.31949			1.1993	4.31237	6.04954
		3.84771	3.82454	2.07881			1.26446	3.81914	5.11802
		2.24564	6.44171	1.41285			2.59848	4.39664	5.7116
		7.66336	1.66737	2.62879			4.90336	2.34257	3.4022
		1.97784	5.34149	3.53862			2.94114	3.94168	2.94514
		2.49363	4.02965	2.64689			1.26666	1.37679	3.75353
		2.48609	4.92341	2.01601			1.36843	7.30171	7.20257
		2.5752	1.9478	2.07202			2.11817	2.07165	2.89829
		2.43423	4.02315	1.1984			2.45132	3.04363	5.19431
		6.27817	5.75642	1.36702			2.14014	5.46375	3.14657
		6.62942	5.94876	1.49093			1.30473	3.45362	3.1111
		1.55257	2.39322	2.76289			2.41397	6.1157	2.40777
		4.83828	2.78911	3.01128			1.97321	2.46406	1.67099
		3.31589	1.58151	1.51979			1.85752	1.08675	2.71426
		4.44036	10.2707	1.76705			4.72617	5.60231	6.04419
		10.1306	1.3876	1.19784			2.20677	4.79112	1.92461
		2.25743	6.14805	1.55487			10.9614	1.37059	2.26189
		1.70155	4.68513	1.5311			5.99869	1.68545	5.22509
		6.24799	10.809	1.90058			10.1992	1.54017	1.82156
		3.38708	5.84206	1.25894			2.4191	1.28787	2.60719
		2.94625	5.58628	1.39644			1.96662	1.2553	1.32836
		6.11598	4.86692	1.42529			4.38059	4.21621	1.57462
		13.3927	6.84588	1.52657			8.25671	5.15923	2.02499
		6.27204	8.82305	1.26969			2.2053	17.0649	3.88737
		4.73032	5.42152	1.24989			4.0577	6.09502	2.70356
		9.39934	4.35403	2.01092			15.4701	2.77944	3.437
		8.76615	5.59906	1.81005			3.05682	10.1489	2.05912
		5.75483	2.17242	1.03431			2.46962	2.30276	3.01875
		5.65394	1.02893	1.58542			1.63641	18.5735	3.96031
		4.91891	5.52934	1.21821			9.75693	6.13172	1.37185
		10.4668	3.82297	3.15952			3.32626	5.21352	3.41291
		4.31353	4.27534	5.09915			4.45234	7.1249	2.1595
		8.05375	3.75572	2.1767			2.9016	5.92492	1.75196
		3.09429	3.75818	1.77893			2.0823	8.47222	5.66609
		2.48138	2.98211	2.02223			2.22214	6.59858	3.51128
		5.69166	2.8716	1.34891			14.098	7.903	1.10217
		3.8595	3.63579	2.66104			6.77626	8.13151	2.8655
		6.68882	2.99826	1.34155			3.17104	4.529	6.75755
		2.56719	2.75683	3.198			1.68034	9.18673	3.08031
		3.14427	7.60155	2.15067			1.68839	2.27174	1.3752
		2.05139	5.27917	1.15144			9.39963	1.59601	2.2572
		2.16596	3.11281	1.58372			6.96223	4.13917	4.30361
		3.92456	2.18026	2.35437			1.84068	2.78409	7.51977
		5.3305	4.19218	3.49902			5.33827	1.50295	4.1604
		8.65912	5.36054	3.00506			7.11525	3.34711	3.49723
		5.4413	11.158	1.12032			3.59716	2.53541	4.96143
		3.24894	18.8252	2.00356			10.9021	3.61596	2.70757
		3.34889	4.57999	4.25042			1.90218	1.81419	2.36695
		8.43046	7.16846	1.85701			2.48646	10.7941	2.70891
		4.30882	4.06462	2.00016			7.27048	4.02336	2.203
		2.1273	3.19373	1.58542			2.26974	4.20535	2.61656
		1.04432	4.35784	1.33986			2.30195	9.25084	1.8858
		14.1297	4.389	1.67482			1.25568	3.97011	4.05534
		4.26214	1.2661	2.00299			3.47343	6.86174	4.02321
		4.09807	8.36261	2.21235			3.09855	9.01146	1.89717
		3.96936	6.67283	1.34947			4.27442	5.28435	3.65315
		2.09335	10.4965	1.12824			1.55806	5.89183	4.6014
		2.93588	2.25312	1.09203			2.5443	3.6599	2.73702
		5.52192	2.28518	1.70877			5.00147	4.71409	2.16418
		1.92268	6.18683	2.87831			7.17163	6.00764	2.38034
		1.49081	6.5928	1.5775			2.32538	3.2158	2.42517
		1.49458	1.80792	1.68048			4.19608	8.73124	4.00782
		1.57897	5.00882	1.50621			3.74653	7.1523	5.87221
		1.82178	3.97899	1.02526			7.08743	1.48278	3.46109
		1.11645	5.61228	1.28667			2.04276	2.02409	1.19251
		1.35879	4.94561	1.62729			2.85547	1.82607	1.99622
		1.39133	3.99244	1.57637			2.31513	4.12676	2.42852
		1.5521	5.1552	1.18086			2.10499	15.1504	2.02432
		7.28996	3.44637	1.76026			6.3538	4.00889	2.71426
		1.91231	7.34085	1.43604			3.82999	1.15397	2.25854
		1.53984	6.21328	1.09995			4.24953	2.76651	1.03458
		2.83781	2.99579	1.12824			2.57212	7.84406	1.41334
		2.25978	6.01198	1.41568			2.92576	9.23533	2.58043
		36.6827	3.24686	1.45415			1.11876	3.14083	1.69976
		1.82367	2.85972	1.22386			2.37151	5.68658	1.81152
		7.63885	1.18473	2.45848			6.36478	1.83021	1.34709
		3.70768	2.92563	1.44114			7.61972	1.65753	4.2039
		2.36209	1.08856	1.55883			1.68107	1.04849	1.42405
		1.16785	2.85635	1.56448			1.28277	11.628	1.97547
		1.21169	3.6127	4.35793			7.20165	3.97269	2.7504
		6.22678	6.24422	1.40323			1.29448	6.47037	2.54496
		3.0231	5.36099	1.23178			4.75693	4.06576	5.53426
		4.21452	5.67998	3.04749			1.68985	2.42736	1.5947
		1.01509	7.62644	5.63554			1.23005	5.54647	2.40376
		4.47431	17.4177	1.91133			13.305	3.20959	2.19028
		2.65488	2.51853	1.11975			1.24836	4.2343	1.88446
		5.26544	2.4997	2.77081			7.03252	4.0761	4.16308
		3.62187	10.3469	3.54768			3.01362	1.15345	3.5956
		5.65535	8.26016	4.55709			1.20003	15.4125	18.3728
		4.84583	3.65485	1.98715			3.34457	1.59342	3.67055
		1.46252	2.7232	2.00752			4.77523	1.72681	1.48428
		2.76096	4.77771	2.90095			6.69426	5.82669	6.27841
		6.59312	11.1096	1.3093			1.18392	6.42021	4.46689
		6.86139	5.17291	1.18312			2.97262	3.49136	2.79925
		2.98303	5.63291	2.67632			1.35379	4.51194	1.36784
		4.87459	3.9494	2.10767			6.78578	1.82246	10.7634
		9.91749	11.3407	4.20403			2.25802	1.20256	1.02186
		2.82603	1.82496	2.8206			7.85255	2.95781	1.90989
		4.13531	5.75418	3.72082			6.78212	1.29407	1.92996
		8.00189	2.25984	1.16558			3.29844	5.76775	1.42071
		3.92079	13.6938	1.38116			3.6616	5.06203	2.027
		4.58369	10.3357	1.83891			4.97511	7.13679	1.23801
		6.27628	2.7983	1.59447			3.38703	7.00185	1.24069
		3.53041	1.28897	2.0675			2.58311	3.68214	3.04284
		3.80057	1.89535	1.04337			4.09211	13.4086	1.99622
		5.37859	2.69002	2.36908			4.11628	6.52827	2.86149
		1.80717	4.47351	1.19444			4.9224	5.08375	2.58912
		5.28194	2.73104	1.42586			1.54635	3.1703	2.93242
		1.27581	2.35601	1.36475			11.7711	8.71005	2.29735
		3.80057	1.22015	2.08221			1.50681	6.03866	2.06916
		1.30316	4.93059	1.35796			3.89955	3.33832	1.13027
		3.49835	5.39058	4.11406			12.7852	7.15592	2.47469
		1.405	1.78416	2.52751			4.7701	1.57326	2.08254
		3.09335	1.11075	1.67369			6.96809	4.77819	1.59135
		5.05422	2.02895	2.93886			12.969	8.53788	1.27415
		2.68128	7.26822	1.10787			1.86192	5.82152	2.03436
		1.70108	1.28426	2.19877			9.09725	5.82824	1.44614
		2.10184	5.50894	2.24234			7.78373	8.05448	5.85079
		3.96841	5.51186	1.02073			1.54635	5.70933	1.23935
		2.6728	3.78397	1.03997			6.80188	2.47699	3.22352
		2.32155	1.0379	1.85362			6.15318	7.02615	3.6846
		1.29892	14.7696	1.02979			4.80744	7.73548	1.65426
		2.25413	3.27151	1.01112			3.3409	12.3674	2.50547
		3.57001	7.05033	1.90001			4.69323	6.9336	1.54986
		1.78878	4.90638	1.03149			8.7707	5.70519	1.87576
		1.17067	5.85237	1.36419			2.01128	1.58153	7.05869
		2.12541	1.22845	2.7561			2.53698	5.40429	1.18314
		3.37341	9.52358	1.13616			3.5115	5.51855	9.30452
		2.53277	2.94535	1.24932			3.47123	9.07609	4.51641
		6.5389	1.40666	1.41058			5.02051	1.9605	2.48941
		4.39793	1.72341	2.00299			2.0596	2.20607	6.9456
		1.81895	6.19311	1.14861			5.38	6.4745	1.59804
		2.42999	1.3356	4.06314			2.55162	2.06493	2.24114
		1.41301	1.16769	2.85455			5.10764	3.3192	2.36294
		1.46016	1.03454	5.26493			1.81432	6.73145	1.48696
		1.92127	2.16412	3.87189			1.70669	7.15178	1.65426
		1.04903	5.76987	1.40266			4.1829	2.22159	1.54718
		1.59217	2.23362	5.09179			6.78212	4.42094	1.65827
		2.686	4.1785	1.03771			1.04408	4.96328	4.29625
		1.15747	7.81766	1.95207			3.70333	5.92337	1.91792
		3.04809	1.5378	1.15314			1.65617	5.50201	1.00514
		4.1636	2.26253	2.27911			2.6058	1.00351	1.24069
		6.02734	3.05228	2.76006			4.40622	3.19201	1.83025
		6.42338	4.55757	1.7529			3.48368	2.24227	7.43545
		1.49882	9.23171	4.72005			1.68839	4.36407	6.17134
		5.19142	7.34219	2.63162			1.24982	3.29903	2.88892
		2.01933	3.98975	1.08071			2.38469	7.21589	3.4477
		10.545	3.33697	7.52141			1.72427	2.23658	1.79211
		6.26356	6.834	1.36136			2.53112	5.68451	1.3143
		6.27723	4.09242	3.25741			2.95285	4.24981	1.17043
		2.4776	2.7696	1.07279			7.20385	7.86939	2.10596
		8.88543	8.36821	2.15463			1.75355	4.26481	1.62816
		3.10231	9.59486	1.25894			3.64329	3.26388	1.19318
		8.75389	3.55285	1.58316			2.65925	3.38899	3.12515
		9.37859	1.68508	2.44603			1.24396	1.70664	2.19898
		3.76709	5.15386	2.2876			1.45336	5.38154	1.27616
		6.70061	2.72567	1.40719			2.27193	9.31288	1.50837
		2.94154	5.02339	2.11785			1.27398	1.58205	1.00112
		5.70438	8.24492	1.00715			1.5954	1.87881	2.55433
		3.84205	6.17271	1.98545			3.52468	6.03918	1.03926
		2.2447	5.9779	1.28158			5.40563	14.7244	1.96878
		4.00849	1.88884	2.91226			2.83717	3.08344	1.68303
		1.69967	1.40419	1.34268			4.53727	8.03742	1.36583
		1.47242	4.38519	1.81288			1.44897	3.76589	1.72586
		3.37577	1.6575	1.11692			4.15435	1.9088	3.43365
		2.22961	3.27981	3.72761			1.69205	3.08912	3.0067
		2.9057	3.93775	1.685			3.84537	3.82587	7.14636
		3.21122	4.59321	2.52751			6.33622	2.47027	5.32079
		6.36445	2.62232	1.25951			14.6845	6.87828	4.70446
		4.08864	2.87698	5.62083			8.27282	7.70188	7.86641
		1.01792	1.55259	1.26008			8.27575	5.15716	2.35423
		5.30834	5.41098	3.58502			12.1658	3.95977	2.98797
		1.85997	11.5398	1.83381			1.51926	5.62661	8.63465
		1.2678	7.99206	1.21368			6.44312	2.19832	2.91101
		3.98916	4.93193	2.85285			1.0946	4.3894	5.09058
		4.4644	1.09013	1.27648			7.34077	3.15686	3.13787
		7.124	3.59454	2.43415			10.1589	9.33046	2.92172
		5.75294	2.68599	1.17294			1.86484	9.23481	4.38592
		2.86468	1.15424	3.89452			3.0473	10.1561	2.31342
		4.15229	1.86329	2.91057			3.14907	4.81335	4.68505
		7.83593	1.84737	10.4863			6.65911	6.89948	3.38748
		1.64262	1.3885	3.44017			6.88242	3.71832	4.54385
		3.52758	1.42639	2.17217			7.28219	5.66228	2.65805
		1.22678	5.94046	2.31306			11.2	10.1535	1.88848
		5.40924	1.7187	2.03921			3.53566	7.17918	1.53848
		3.50589	1.35174	1.65388			15.361	4.91107	3.82245
		1.99576	2.14148	2.68763			2.63216	8.18683	13.2501
		2.34418	2.03366	3.80399			1.7477	7.1218	7.32035
		2.02405	8.33638	1.5526			8.72311	12.0799	4.16441
		1.48232	5.1839	1.08354			4.65223	11.5965	1.59202
		1.88449	8.32831	3.39717			66.214	4.1371	5.02701
		4.29043	4.19868	1.9747			13.923	8.39519	2.45261
		1.2447	4.3825	1.16785			2.60507	6.28166	2.53023
		7.54974	26.4559	1.30647			6.7953	2.3891	4.60475
		4.08958	7.26844	4.91526			3.60156	2.84872	4.79279
		6.66337	7.0176	1.62163			8.52835	5.97921	3.30717
		1.97124	2.10494	5.55689			1.19491	2.90042	5.9766
		1.49175	1.08857	1.41568			7.9719	10.1101	1.74727
		1.25035	4.15048	2.24347			5.73364	6.96876	2.33215
		2.50448	2.01303	1.11183			6.21834	4.1309	4.47225
		49.6242	4.56385	1.93113			7.09475	10.9756	1.16173
		1.08817	3.54993	1.29346			3.37971	4.47419	2.92239
		9.69307	8.70559	1.87512			6.14147	3.65629	3.49789
		6.21122	2.2845	1.91642			1.21834	11.1653	9.91282
		12.264	6.82055	1.26404			2.11012	5.77861	4.40064
		5.75625	2.74293	1.51356			2.65852	3.58856	10.4703
		2.37341	1.10089	1.25215			5.03954	4.70064	4.18048
		5.66572	2.06347	2.44433			7.22655	2.77996	6.42295
		2.8199	1.98232	4.55823			2.064	1.94395	3.81911
		6.09241	3.91869	1.76931			2.19945	5.40843	1.41535
		2.56294	3.89851	1.75007			3.57886	6.25581	3.4283
		4.93258	2.73217	1.57071			3.04145	3.5472	1.70244
		2.01414	5.50065	1.40719			5.51546	6.21031	2.83004
		4.1141	3.89067	4.63744			5.45688	2.49715	3.75487
		3.07167	3.94357	1.47509			2.23093	2.80529	3.05154
		3.06506	8.51572	1.38286			3.08318	6.444	1.51573
		2.31542	1.01436	1.07675			2.09328	5.02171	5.99668
		2.54927	5.6356	1.84457			2.48792	2.96556	4.01117
		3.20509	1.68664	1.5526			3.34017	1.92999	4.69308
		3.92928	2.62748	4.39301			3.21424	3.19305	4.73256
		6.31636	3.8539	11.859			1.73452	2.63106	4.35313
		1.40547	3.70349	2.46583			1.41822	16.3907	1.59604
		4.033	4.34282	1.28101			2.79104	1.20153	6.17535
		5.28901	6.9304	1.18935			5.14352	5.0367	7.67636
		6.48986	7.61366	1.07222			1.47752	6.83486	3.17601
		3.1009	3.0933	1.60918			2.86792	4.6293	3.47046
		4.43564	4.3547	1.8191			2.16796	1.7692	4.07474
		3.88119	5.17023	2.0658			2.33417	3.63302	4.45886
		4.09618	3.2213	5.07312			1.50169	1.84882	3.1024
		2.16454	4.4818	1.91529			2.70684	1.81315	2.19564
		7.01886	5.45828	3.0458			1.1971	1.25478	3.43834
		7.06883	5.13794	1.86776			6.88682	2.45166	1.90587
		1.76096	3.02829	1.00093			7.5304	1.30235	4.3451
		1.23102	3.94716	1.26743			7.67976	5.73104	4.94938
		3.64969	4.61586	7.60685			3.46537	4.21776	2.15214
		6.56341	3.32958	1.38569			3.26549	3.70747	3.86261
		2.64734	4.92453	3.84813			4.98097	6.53964	4.14166
		3.64121	4.3946	3.91319			7.43595	1.35094	2.7417
		2.20792	1.0166	2.92867			9.40769	3.54668	5.55434
		5.46582	1.0527	2.0839			16.7148	3.55806	2.8655
		4.2678	6.02139	2.54618			5.29068	1.74077	3.18069
		7.98868	1.05785	1.94754			1.4907	2.79443	5.58445
		1.37152	5.24084	5.54954			8.20107	6.36386	3.00603
		3.84253	2.4997	1.35287			13.6309	3.64853	1.67433
		4.28854	2.7167	4.87339			4.28175	6.49053	3.21683
		1.40688	1.46023	6.67042			6.95711	12.1451	2.82669
		1.6728	6.0985	2.89472			12.5421	3.66869	3.17936
		2.77982	7.58183	2.24573			5.43785	5.94405	4.82224
		3.43046	7.1929	1.54638			9.87188	1.19998	3.7281
		1.65818	3.18992	1.03205			5.77904	2.16937	2.59916
		3.64262	8.69662	4.36868			5.7622	1.57378	2.61188
		1.64121	4.61272	1.66916			1.48485	11.717	3.78632
		1.15417	1.91798	2.19537			5.93353	1.76662	4.99957
		8.78265	6.16957	1.42643			3.30356	1.22996	3.57619
		1.33993	2.36408	2.71706			8.90322	3.99751	2.73902
		4.34465	5.34776	5.98861			5.79734	4.06162	1.31296
		6.78878	1.69404	2.16029			3.14688	7.50335	2.8916
		12.4055	7.83985	5.65818			4.69249	1.95791	5.09527
		1.92833	1.58061	4.91243			1.30912	15.5015	2.85212
		1.32108	2.71939	2.6452			1.01406	9.5414	1.51774
		4.82178	10.8114	4.43261			10.0835	15.7688	5.41314
		3.73597	6.25139	1.01112			8.51517	3.56943	3.71806
		2.51155	3.39459	1.19331			5.3844	2.74894	7.5974
		10.3522	12.5508	2.19877			13.3241	4.90951	3.61768
		3.3753	2.57032	5.98013			4.24807	2.81305	2.21437
		7.88213	2.33046	5.10198			1.47533	5.62712	4.42005
		4.33145	3.73151	2.2627			1.06897	4.64791	1.55655
		5.66242	2.94782	3.82097			7.71856	4.64946	1.89851
		2.27346	2.29705	3.14029			1.53317	9.65204	2.63396
		2.79585	6.70376	3.35417			5.62235	16.8669	2.31475
		6.48845	2.42595	3.17141			2.17382	4.62826	3.7455
		14.3159	6.4361	1.27309			7.40666	8.3621	4.64423
		5.752	6.31259	2.05958			5.41149	4.11849	3.93488
		4.93541	1.34456	1.62559			8.77363	6.44813	2.59314
		6.75436	2.30602	2.04204			2.08084	7.47905	1.95339
		6.18906	2.34054	1.98941			6.46509	5.8727	1.92796
		9.93258	1.80433	2.66953			8.18935	13.3792	2.11533
		1.0943	3.53581	1.93962			1.85459	3.59166	3.87331
		4.13249	1.484	8.46576			5.09007	1.31682	2.60318
		6.32532	7.46437	4.74495			6.43287	3.42156	2.72497
		4.05092	3.14194	2.77194			1.97467	2.14869	5.01965
		2.04102	7.27248	2.21348			2.42642	4.56519	3.88268
		8.92975	2.44792	2.291			4.42232	10.7129	1.46086
		1.24045	4.02382	1.27139			1.49876	3.05242	1.50703
		4.28053	7.05884	2.22649			4.07747	4.16089	4.57463
		3.1834	6.12653	6.79773			4.49408	5.34277	1.78006
		1.79208	1.35039	4.44563			5.57769	7.50438	2.02834
		2.96275	2.38112	4.27192			1.19125	40.9631	2.80996
		1.22725	3.545	1.18482			6.22859	5.67314	3.24695
		5.80481	5.27133	3.09898			1.88022	7.62174	1.62013
		3.56388	4.41097	1.16049			4.02183	1.2677	2.88558
		6.73833	5.60489	2.9762			1.92708	2.64036	1.68838
		2.719	3.93438	5.79058			4.01304	5.92854	1.05332
		5.88449	5.41546	1.60183			3.82048	2.29552	1.46755
		3.37058	7.83738	1.93114			3.41046	5.49115	1.83628
		5.08015	1.23337	2.19254			4.68883	2.06235	3.7803
		6.77133	3.64857	1.99451			1.11437	5.669	2.61054
		1.90948	6.8006	4.13613			3.27208	2.12129	3.97035
		2.56153	2.26074	3.00675			4.00572	2.24589	4.35982
		4.36775	3.17423	3.27721			2.02006	2.8482	1.54852
		1.32768	3.00453	3.60807			1.45556	8.22561	6.4872
		2.48043	2.72656	4.52504			2.84962	6.42797	1.86907
		2.47006	14.8447	2.0809			1.50388	4.91158	2.02298
		3.66902	4.34192	5.03916			2.25875	1.70871	2.15214
		6.61999	2.06796	3.70667			2.78958	1.3587	1.23534
		1.23432	1.58667	1.79855			1.19417	3.03174	4.93332
		2.92126	4.11932	2.04128			1.69278	5.33501	1.41401
		7.22065	4.46611	8.90091			2.51941	1.20877	2.40309
		5.53701	4.63424	2.01263			1.34134	1.75266	1.72987
		3.53843	6.33097	3.17739			1.0082	5.50718	1.94669
		2.31353	3.67861	1.78507			2.03398	7.44182	2.8113
		1.52145	1.37415	1.38895			3.94275	3.38641	3.42629
		5.04243	11.1338	1.8348			3.27647	2.34153	2.05644
		1.17162	16.2128	2.21996			2.55894	1.78575	2.35089
		3.39887	12.5454	2.34469			1.8048	6.12914	2.30605
		1.5917	13.2515	8.21065			1.04554	1.2341	3.29847
		2.07968	30.901	1.04424			2.41617	4.13142	5.91771
		2.1603	12.707	1.87694			1.41675	1.42798	2.65537
		1.36728	2.93907	1.84322			3.1564	4.67066	1.19452
		1.4677	44.3264	5.31897			1.56831	7.1311	3.88134
		17.6756	9.88516	6.21993			2.22141	8.36727	2.203
		5.20462	9.76097	4.40873			1.4475	3.63044	3.19408
		10.4984	4.51162	6.53851			3.04438	7.73187	3.78096
		44.0387	26.8861	3.44793			1.88608	3.45569	2.48071
		3.38755	5.97028	1.53054			9.03867	1.41609	3.36205
		15.5658	10.0878	2.59248			4.75326	1.44297	2.40376
		11.7228	3.74922	5.33835			5.46054	5.95232	2.28732
		8.24139	12.2248	1.9275			2.26168	2.71946	1.62414
		12.5568	7.806	1.9629			1.64153	4.89659	6.21216
		10.2126	4.85303	1.05267			2.02812	1.50553	1.99421
		12.1565	20.2263	1.37041			6.35599	2.26346	3.96767
		13.7572	5.44864	1.34765			5.01465	3.98355	3.76022
		14.1683	8.84524	1.57774			4.04086	1.08003	1.93398
		5.74729	17.5768	1.33754			3.22302	2.27225	4.849
		7.73362	51.2481	2.22249			3.28746	1.05263	2.33215
		37.3696	58.0554	1.8348			3.00703	2.02771	1.87241
		19.8322	55.4911	1.23134			2.24704	3.97321	2.08589
		31.0632	2.7705	3.43192			15.9445	2.2433	1.06536
		12.5785	3.57885	2.27474			6.78285	1.75111	1.24136
		9.34559	14.683	1.79687			1.31938	6.43779	1.89115
		25.4701	14.1244	2.7366			6.59468	1.02678	1.12157
		12.3918	9.27094	16.4483			4.76864	2.40099	1.98886
		30.8307	7.16151	3.73364			6.40212	1.48278	2.05778
		12.0358	19.2377	7.96707			3.88125	2.20401	1.12091
		12.3498	11.7381	2.80908			6.08216	2.17764	2.85613
		7.52899	16.2545	1.72439			13.6367	29.6892	1.28285
		84.9019	8.73451	3.60891			2.11378	5.87994	2.05243
		17.3607	7.22383	1.61398			4.7108	4.99275	2.21906
		4.06035	7.90194	4.40789			3.05023	4.85626	1.94803
		18.2112	4.9057	2.58911			3.19886	6.32767	2.98127
		3.8265	8.41417	1.57268			2.7786	8.75089	1.52577
		14.6233	16.9324	10.7273			2.67756	8.68058	1.68504
		21.0217	4.86625	2.18456			4.24001	5.36345	2.90097
		56.2843	14.5219	1.61988			4.5878	1.62134	3.85056
		3.38897	7.16107	1.44036			3.00703	3.01209	2.47335
		12.3536	19.6116	1.81541			1.99297	1.47968	2.15548
		13.8736	11.8964	1.38811			1.84727	3.88584	1.82892
		54.3027	20.5217	2.29834			1.71255	2.2159	1.13697
		4.42244	37.2839	1.55583			1.41602	4.22293	2.71426
		3.6992	4.16258	1.83901			7.87452	11.02	1.57261
		6.25695	23.4803	6.34045			1.58296	8.47429	3.02544
		9.08392	9.73273	7.64091			1.59321	4.55175	3.40822
		5.42433	18.8391	3.96289			13.1674	4.41991	3.33193
		17.8991	6.71923	2.90601			6.65692	1.90259	1.61343
		24.6351	5.44012	2.07331			7.19799	3.88377	1.72184
		17.8774	4.98775	1.77411			12.4667	5.21352	1.64623
		11.8751	6.41391	3.19087			3.89882	7.21899	2.07585
		8.00141	18.415	2.52			1.44677	8.77002	1.44814
		13.0269	3.40669	1.71512			2.47767	1.92999	1.60607
		11.7808	5.17583	3.54991			2.29902	6.63632	1.12626
		8.40499	12.5855	1.28613			3.16299	2.02564	1.46287
		14.1636	4.42531	2.22586			1.17807	6.20049	1.40331
		5.94955	8.22474	1.7109			1.05213	1.59549	1.1731
		3.48939	17.5439	1.63674			1.06092	3.55961	1.89784
		21.8911	13.9554	1.90306			5.49056	1.15707	1.40732
		4.84724	2.7492	1.98566			16.1605	5.43428	2.32011
		17.7011	2.83663	1.19595			1.45556	5.70468	1.20857
		24.8284	4.18814	1.63168			4.39157	3.50584	3.48384
		2.21264	5.34149	1.64516			1.92781	3.48412	3.67724
		22.2141	5.83309	1.78338			4.13019	13.4412	2.6875
		40.5922	6.51524	1.96206			6.29449	2.43356	1.1711
		10.2277	23.5128	1.008			1.55074	6.47243	2.65203
		9.13861	22.7619	4.51071			2.24997	2.25674	3.70066
		65.2706	14.2044	1.93509			3.55397	3.14445	2.60652
		7.44507	9.78518	12.1095			2.95212	7.14868	1.94469
		23.0693	20.0046	3.74292			1.81213	2.71326	1.70378
		8.84017	4.54188	6.20645			3.5774	5.76671	4.63553
		5.83781	4.63737	2.50146			1.40357	4.53623	1.36382
		9.94295	25.2362	2.36408			1.49656	3.65422	1.94067
		32.7081	20.1734	3.72943			4.27882	5.20266	2.02098
		19.6096	12.2898	1.48082			2.71783	4.06162	2.32881
		9.35314	20.9553	1.6873			1.62982	4.78698	2.2398
		30.8637	11.0475	1.28107			1.09826	5.93216	1.26144
		59.3772	11.0302	2.01347			2.33856	2.93557	1.91792
		13.619	21.062	6.95149			3.56714	1.21756	1.40398
		11.2499	4.1859	4.02273			2.64314	8.20441	3.61233
		3.75153	9.95577	2.21996			1.12096	3.90238	4.54853
		64.3234	8.65941	1.55414			9.57096	2.39634	6.1526
		12.215	20.3545	5.57265			1.24909	5.42756	2.4051
		4.43093	9.98604	2.16518			1.37356	1.90104	1.22998
		51.2518	26.1011	1.91233			12.8394	3.57512	3.48384
		15.6214	8.44757	2.07921			2.17748	5.06565	3.80706
		54.761	2.74584	2.28907			1.64226	5.19077	2.99533
		82.9759	33.7102	1.33838			1.1151	2.0608	1.39929
		16.7614	8.14741	1.95026			3.34969	6.08106	2.58042
		26.1839	9.17724	1.86177			1.30913	2.91179	1.55789
		12.3277	13.7536	1.54908			1.53537	12.3265	1.86773
		14.3357	5.68559	1.90475			1.00015	2.4377	3.33796
		13.5068	6.09895	3.13441			3.09416	8.42828	1.3491
		23.958	8.47223	1.35271			5.26945	4.04766	1.68036
		42.1037	9.58769	3.18245			5.48544	2.24951	1.20589
		4.16926	11.546	2.22839			16.471	1.43677	2.06314
		7.88685	3.36993	4.38261			7.39494	6.9274	2.53157
		3.32202	4.044	10.5107			1.35159	1.3587	3.72876
		47.801	5.07181	3.49513			2.55675	2.82855	4.10218
		1.42386	3.29371	3.40663			6.54416	2.20194	1.20924
		6.03112	5.7163	1.41086			2.82033	1.78161	3.28107
		17.0038	10.3602	2.84617			4.25319	2.40616	1.10083
		6.15276	17.2845	3.48586			1.77479	8.19769	3.70668
		4.76096	11.5801	4.58404			4.75473	28.6092	1.68638
		8.23998	7.69705	1.34849			3.17909	4.50366	1.23735
		7.66242	32.8116	3.61649			3.19008	2.21745	1.25474
		14.2438	6.85866	3.29623			1.08069	2.03753	1.46019
		33.9755	13.3221	1.48587			5.57476	2.97383	1.50569
		32.0434	14.5017	1.99999			2.3122	1.44917	1.0754
		13.9958	6.48228	2.08679			11.4929	12.4408	2.27594
		51.2357	9.14092	1.38642			3.42584	4.35166	1.00045
		3.10042	11.6785	1.80698			7.12843	1.76248	1.36918
		59.5846	15.9888	1.10239			3.18568	4.49539	4.5646
		6.50259	20.0608	2.7248			3.15859	1.91603	2.07384
		43.7845	12.334	2.12472			5.28555	6.43521	1.19653
		50.2541	14.9207	2.46353			2.60654	17.2908	1.31765
		12.5964	8.27787	1.23724			3.72237	11.2584	1.66898
		5.50636	5.31773	4.25366			2.85328	5.93836	1.76534
		25.0471	23.3895	2.75346			3.53273	2.0913	1.56057
		7.95002	5.06688	4.0969			4.84479	2.47078	1.83828
		34.9349	14.4125	3.83478			1.30693	10.2745	1.70846
		11.2225	2.62344	3.23723			2.84742	7.41029	1.78475
		4.4743	8.23461	3.85501			1.77772	1.68648	1.86572
		32.43	4.84428	1.90728			2.26022	1.42281	2.21504
		19.3244	9.18688	1.90728			3.53639	12.7727	1.72653
		40.8185	7.52467	4.07751			5.13326	1.66425	1.14567
		14.1165	13.7548	1.06362			1.54562	10.0083	1.96409
		36.8519	14.5905	1.65949			1.06897	5.99523	1.07339
		5.22395	3.44457	2.10365			5.34559	6.62857	1.41
		7.32296	4.65576	1.64938			3.08464	4.14744	1.09213
		4.05422	1.18227	1.15802			5.81272	10.9332	1.39528
		17.4795	6.309	4.89166			2.29609	1.11002	1.50168
		60.8123	1.42728	2.62114			4.4582	10.6478	10.2066
		9.14851	6.84275	2.10871			8.10515	1.01747	7.22465
		31.3531	1.70772	4.72563			2.43448	4.32168	3.14389
		5.02499	4.46746	2.13231			2.47182	4.04197	3.75152
		13.4988	7.92839	1.98229			3.28965	9.52071	12.251
		8.01556	4.34999	1.35776			1.92561	6.16481	14.8635
		14.1495	6.87906	1.57352			2.52673	7.10732	3.78565
		4.58934	7.44912	2.12894			1.66057	12.583	6.73614
		8.57944	1.83482	1.96796			2.72295	4.00061	4.50704
		7.44602	4.36882	2.31435			1.91097	7.3286	11.9371
		1.93823	1.86194	3.08468			2.21263	4.08333	4.37521
		17.2546	10.7249	2.21912			2.34515	4.48712	2.12805
		10.8072	8.76275	2.56551			1.44677	2.07682	6.15929
		1.99623	54.8644	1.9806			1.86045	6.74386	3.35469
		8.29844	9.21579	1.32068			2.69879	4.97672	2.67277
		7.34088	18.3933	4.48711			4.49115	1.90156	1.37788
		2.20698	13.566	5.68306			1.86924	4.68307	4.25944
		20.8388	14.1267	2.08174			1.59248	1.95274	4.38793
		2.6959	2.82587	4.27557			15.6853	7.81459	2.49811
		12.8567	13.2918	3.80444			1.47899	9.64221	2.93042
		21.8906	10.3203	1.67888			3.98082	1.37059	8.38437
		64.1443	23.2949	1.63168			2.28731	1.30803	3.49856
		3.86421	14.4826	1.18752			2.22947	3.73074	2.60251
		6.38708	3.72972	5.12259			2.43301	1.77799	5.20368
		2.72136	2.69159	3.38388			3.29478	2.50801	3.58088
		26.7044	9.05641	1.33332			4.77889	6.71594	4.05935
		11.1292	9.45386	1.95447			2.71343	7.89214	6.40087
		20.6346	2.94535	1.2777			2.19286	1.97342	4.00113
		74.934	14.9352	2.88915			2.17895	6.47605	4.18717
		61.9764	8.58924	3.40495			2.1211	1.84934	6.25967
		8.86846	5.43362	6.32697			1.70816	5.14941	2.77985
		14.256	11.364	1.9216			2.41397	2.61348	2.52823
		23.272	8.16758	2.9296			2.49525	1.31217	5.65606
		1.39698	11.2241	2.62619			8.22962	1.44918	2.82
		3.20603	1.79312	8.88911			6.81946	4.17795	5.77852
		12.2885	14.3643	8.81831			4.71519	7.1828	1.24805
		28.9826	8.11782	2.60344			10.257	2.76393	7.37322
		55.0867	3.77612	2.02274			2.73833	3.65887	4.8557
		6.70721	8.18103	2.05477			1.27984	5.04084	4.78409
		10.2183	8.96854	1.6637			4.9451	4.40543	6.6284
		9.64262	8.29222	1.69236			1.42481	1.53552	3.05823
		3.9637	13.4997	3.14031			9.13239	1.45952	3.57887
		8.54832	11.0822	1.41929			18.7019	6.45899	6.34198
		7.96464	8.90173	1.74209			1.72866	4.36614	2.56169
		1.96935	11.0385	1.73029			13.5576	5.89338	10.7781
		2.98821	7.51906	8.35814			3.74287	5.26884	1.74125
		34.769	11.7751	11.5043			1.61883	1.4347	1.36516
		55.24	21.2236	5.44202			5.0659	3.72091	8.56439
		25.4842	12.4577	1.85839			5.65164	21.064	3.97369
		12.9109	3.417	3.87608			5.70216	2.54058	1.61143
		12.4536	11.9589	4.12808			1.39991	1.06917	4.30829
		10.364	6.45493	2.39189			1.84434	2.05253	3.10039
		9.67845	2.56	2.23513			9.43917	8.14651	2.93778
		10.2706	26.9265	2.57562			4.70055	7.44699	3.25498
		11.0816	10.3519	2.06488			3.78826	9.05954	3.702
		6.93494	7.2328	3.13104			1.56319	28.1599	3.97503
		11.8845	5.87904	2.01516			2.60727	4.92658	1.2688
		15.4031	5.83959	1.01558			6.75063	8.2923	4.54452
		4.04998	11.5037	1.12684			3.94568	1.24237	3.33193
		3.31447	4.37936	1.75641			2.4396	1.43728	3.06827
		8.94201	10.7303	1.87019			5.57623	10.3345	2.46064
		13.3465	6.60692	1.9629			2.45717	2.34463	1.25675
		6.72984	8.44286	2.11292			2.56773	5.91458	3.64846
		37.819	8.78629	1.20606			1.46947	9.40594	1.39528
		45.8076	5.5085	1.69742			2.29902	3.42984	6.01809
		71.4616	3.94582	1.95869			1.24176	5.02067	3.28107
		12.8317	9.8818	6.30927			1.39918	5.35001	4.72453
		20.1999	10.8648	2.63546			4.64198	5.40584	1.10886
		20.4097	12.8731	5.06697			1.77625	1.26615	2.41379
		29.5295	4.27646	5.84235			8.76411	4.50418	3.57218
		30.3286	6.7143	7.95527			1.72719	8.82431	1.06871
		20.4804	5.02608	2.83858			5.34633	7.96193	2.47737
		12.6803	4.92095	3.47996			4.63758	4.55278	1.90922
		9.79538	2.42819	3.14115			1.76673	9.98499	7.41136
		15.1315	3.31837	7.3316			5.33168	3.41691	2.99934
		21.4149	6.66498	8.5975			1.84068	2.07682	7.1758
		29.4389	6.11263	10.0126			1.16489	3.47171	1.57061
		12.0104	6.26484	3.75303			2.30708	5.78843	1.73456
		10.6016	6.24332	3.31393			1.29521	2.58298	4.24606
		14.9958	1.99263	1.0847			1.93147	13.7741	2.74706
		3.61669	9.43167	1.64685			4.99415	6.00092	1.9052
		8.19425	13.9857	17.6703			1.1539	7.42011	1.73188
		13.1664	2.50217	4.80064			3.29551	5.64832	3.87198
		10.4743	8.61032	9.01047			2.11598	5.76775	3.06894
		13.5974	14.1917	2.89252			2.23313	3.00434	3.80104
		3.47195	7.93512	5.64261			3.28087	3.82121	8.75109
		9.90476	5.72504	7.41251			7.81814	9.92605	2.37766
		7.68223	3.64543	37.3162			1.63348	6.14206	3.82513
		9.21923	16.6772	3.52294			5.94671	3.47068	2.27059
		5.89439	33.686	25.0019			1.64519	15.4017	8.31678
		8.3173	39.3956	9.17735			2.18846	9.14485	1.22062
		15.867	4.63536	1.40243			1.16562	8.99027	4.73189
		4.73974	4.01284	4.16179			2.00689	8.24939	1.62414
		2.40311	14.8157	8.69442			4.59585	1.33854	3.6933
		12.4743	24.9136	1.95363			16.725	14.589	2.16418
		35.3475	26.2322	1.81541			3.71797	6.92533	2.22173
		7.64498	2.32261	27.5995			7.45205	3.34143	1.8684
		26.7133	7.81429	5.37038			1.04408	3.48102	2.42919
		95.0919	8.44107	4.19803			5.82224	1.26719	3.61567
		9.54361	17.0086	3.7977			1.15464	4.87591	2.41982
		40.2574	1.93637	3.12682			8.65648	1.68131	1.40531
		6.05233	5.23523	2.36829			18.5738	1.22738	1.16775
		43.9396	7.40877	1.74714			1.87217	4.56932	2.16218
		47.777	5.15072	2.98776			3.89077	1.7418	3.37476
		36.2735	8.44152	1.46649			3.27867	1.12449	2.63864
		12.7331	4.14555	2.14748			1.50608	1.4378	1.51573
		16.5705	7.11421	4.93465			2.85328	7.31774	4.2387
		11.1504	4.28902	1.73366			7.22728	5.72949	1.28285
		41.0585	11.4057	2.30255			3.88637	3.67386	3.76892
		52.9015	41.1908	3.85417			3.46171	14.6965	3.13987
		54.1249	12.1253	4.1719			6.25275	6.70043	1.48696
		7.58227	2.57727	7.42093			12.9763	3.69816	3.3065
		27.5856	13.1145	3.98227			6.65911	26.7009	6.72543
		5.40405	34.3933	8.5208			2.97628	6.86329	4.96745
		6.7652	50.557	6.07328			6.08802	8.24164	6.35604
		21.4229	6.98106	2.2621			2.74199	1.18912	2.90164
		23.0009	1.97268	2.68098			3.11613	1.16999	4.70446
		7.27487	6.56769	1.19173			4.27076	2.44804	2.07184
		7.25742	3.55352	1.64938			6.89121	2.1854	3.07563
		34.2041	18.168	1.80193			2.36345	3.07052	3.03213
		7.95993	5.68559	5.84319			2.76395	5.1189	1.55722
		4.82037	5.79767	13.9771			4.73203	2.8694	2.8481
		8.54362	8.98266	2.22586			6.10266	3.45206	2.72497
		7.95662	10.2248	2.2208			2.33417	3.92565	3.1914
		41.5125	3.91376	4.63629			6.00528	2.26088	1.02789
		5.57001	4.03503	1.50947			3.29551	1.39954	1.82222
		4.52051	3.31344	4.85121			1.33841	8.00174	4.23267
		2.0363	3.85861	2.64642			1.79748	5.12459	3.64913
		37.2881	6.51142	1.97723			8.75971	5.32054	6.35737
		6.32437	17.3699	3.06218			6.37869	4.25964	1.45484
		28.0448	1.41742	1.30586			1.93147	5.44255	3.31855
		15.8199	6.13079	3.90467			11.3392	7.8575	2.39974
		7.41066	6.32021	3.00152			3.48954	5.03722	3.878
		38.4517	1.04418	4.02149			5.78636	9.02542	1.91993
		13.8892	15.4235	5.71097			6.03237	6.00764	5.53426
		8.45073	13.5012	1.20476			6.86632	4.74304	2.05711
		31.1263	28.3405	7.72171			1.67521	5.61833	1.58265
		30.9378	46.8243	1.57827			2.49964	4.76889	5.00894
		4.91938	47.4924	1.29013			1.76747	2.00651	2.01027
		5.6049	5.03639	2.15622			8.42292	13.3998	4.30762
		14.9439	50.1712	1.22105			3.9098	9.37802	4.03325
		8.74729	63.9945	6.63322			1.3018	10.7833	3.19274
		7.9736	5.27312	3.71033			1.48704	5.77757	2.93041
		4.29703	9.58478	1.05592			4.10895	6.56653	2.16084
		10.5054	20.6318	3.50027			1.07849	3.90755	3.29044
		7.42197	5.7089	4.43094			4.87261	3.88429	1.52175
		10.1928	6.283	1.29744			2.30927	2.15437	3.14857
		26.2687	20.2805	3.27954			6.7477	3.73642	3.10508
		3.29844	51.9233	1.7389			4.2056	4.76113	2.06715
		2.35644	3.05385	1.67431			1.12022	8.59217	4.05868
		10.8109	12.1311	7.94413			1.05579	1.16896	4.89116
		10.6214	22.1331	8.49512			1.01772	6.03298	2.65671
		30.0368	15.2623	1.43617			1.14219	9.95759	3.89674
		62.1957	7.25185	1.76025			2.19286	1.05211	2.50414
		39.5059	12.5474	2.08601			4.51824	3.28818	3.17066
		13.4116	7.91405	1.80012			1.4929	4.57604	3.51462
		6.18105	15.0865	2.22698			1.32596	1.67201	3.23825
		24.6143	10.5149	4.16022			7.01129	2.92368	3.82714
		31.2239	10.5261	4.31636			2.82765	2.97694	4.056
		5.72372	10.3028	1.87202			8.91786	4.04714	3.89004
		4.20556	4.7526	2.47861			2.78665	6.60892	2.13474
		7.19472	13.5454	2.01805			5.68605	1.32199	2.46465
		10.0915	10.8574	3.4076			3.43536	5.30451	2.41045
		26.7063	3.61225	2.60049			3.37971	2.62692	1.86304
		3.97454	16.0828	1.62095			4.24953	4.25912	4.61412
		81.6728	13.8812	5.40486			6.04848	2.65381	3.27371
		12.0745	17.0072	1.18005			2.82179	12.9314	1.06938
		2.39132	15.2423	2.11915			5.60991	1.06556	2.10195
		1.77269	23.8672	1.59062			3.50638	1.1033	3.41893
		1.27146	11.8484	2.71001			2.25582	7.56487	3.4564
		6.98689	2.35489	7.70374			6.438	1.36801	1.55521
		1.50091	7.09538	3.08857			10.9738	10.0512	2.40643
		8.83373	4.10385	3.53172			1.766	2.05252	2.89361
		1.03046	2.2975	1.27048			9.72692	2.3891	2.2117
		2.19873	5.12494	4.24447			5.69923	1.69217	3.03013
		6.05961	1.03723	2.58476			6.88682	1.15655	4.24271
		1.34561	8.75647	1.03009			4.9019	10.5904	3.03682
		2.35578	10.3891	1.78721			5.10397	2.67552	4.46488
		16.5828	11.0195	3.79851			2.39787	1.95171	1.50502
		50.6585	10.9132	1.97817			5.51253	1.33285	2.11332
		4.97669	8.61749	1.02335			10.9372	18.5487	1.03391
		2.90284	24.0481	3.84176			2.52014	1.80384	2.2117
		2.02978	4.2935	2.16913			1.98638	8.57976	4.94336
		1.52365	15.2876	3.49297			5.07908	4.86867	2.34754
		6.06101	7.67531	1.91751			2.83936	3.88532	1.67567
		4.00605	2.20851	2.75382			8.74873	4.60293	2.56704
		31.6363	12.3474	17.4559			12.6278	3.24061	1.86104
		1.48447	13.084	1.06266			2.9675	6.29975	1.83895
		11.6075	4.79519	3.97712			8.52176	21.4378	3.25431
		1.17177	12.2992	6.00977			3.7209	5.4229	1.6228
		3.57092	7.36349	1.34181			5.80247	1.44711	3.13318
		8.70781	24.4525	5.6621			4.87627	1.7599	1.7466
		11.0594	29.8429	2.57353			1.71035	5.33967	1.62013
		1.43375	33.9299	2.44154			5.68313	2.46458	6.37277
		1.52645	8.74347	2.80999			10.0483	1.34422	5.37232
		19.6871	8.71792	2.18542			4.12945	3.20494	3.11444
		1.16197	17.6273	3.35199			7.3393	4.01406	1.28419
		44.2767	4.69745	2.84931			2.67463	1.61565	1.46688
		13.9028	12.1775	7.58523			3.08464	2.67242	2.01161
		4.3156	11.8435	1.2188			2.97409	3.26749	1.39193
		1.33652	11.0215	2.01973			3.72017	5.67572	1.52644
		1.5212	11.0351	1.85011			4.68371	9.30564	1.85635
		58.6241	6.44956	1.27272			2.63436	3.82948	2.10596
		6.40485	14.9352	1.85741			5.24675	14.6143	1.05934
		12.1542	28.0847	1.01829			1.4541	7.42269	1.92662
		15.2935	4.91893	1.33788			2.54357	3.8269	1.49766
		6.30586	9.12142	1.67431			2.57432	7.51576	2.40643
		1.00422	9.04565	1.69902			3.63304	19.8412	1.30895
		1.19345	17.5766	1.67656			1.79529	2.40254	2.27527
		1.15708	9.44579	1.24239			1.83482	8.5203	2.83807
		3.52964	13.1287	1.10423			1.77479	9.61533	1.69842
		14.0958	22.8123	1.02952			3.92371	5.60593	3.32524
		5.46638	7.92167	1.58501			5.89472	1.34681	2.56972
		7.443	21.5489	1.81866			2.95944	3.07465	1.94736
		1.65516	18.0471	1.36877			5.92254	3.81552	1.91457
		4.15436	2.91486	1.25475			1.75868	5.6416	2.83405
		10.6984	25.8688	1.52435			7.61606	3.9577	2.61656
		2.78951	26.2087	2.79595			2.567	3.40812	3.36673
		2.99238	4.78376	1.02335			8.77289	1.19377	3.17333
		1.22109	11.0919	2.01355			2.04716	7.15023	1.5425
		4.25614	4.71965	3.04589			3.00703	1.82246	1.45818
		1.85629	6.48363	1.38393			2.56846	11.7361	1.23333
		7.6018	13.414	2.26855			2.23825	5.6509	3.34197
		3.54609	9.75559	1.13006			3.2589	2.40719	3.25163
		7.88547	17.1843	1.23341			1.85826	2.23296	1.26679
		17.7381	21.3332	1.37214			1.86338	7.67396	1.66496
		2.43238	7.16196	1.90066			6.24763	5.18973	1.82289
		1.54568	10.548	1.84393			20	1.91862	2.45863
		2.26798	4.6385	1.67038			12.6476	7.39219	1.58399
		4.4807	6.64369	1.48559			12.0142	4.39509	9.77229
		1.30958	15.9729	3.09082			4.35936	4.26481	2.18292
		9.53295	35.0806	1.26823			4.40109	6.73197	2.26657
		1.24942	20.2794	1.08344			7.66292	6.10691	2.10195
		11.525	12.2441	1.31653			1.35086	7.58917	1.2882
		11.0241	1.33336	1.00818			7.27487	1.89277	2.45261
		5.86619	9.38437	1.20813			5.43785	3.82586	3.16798
		1.0434	10.5079	1.27216			2.05887	7.56074	3.3239
		1.14588	12.5998	1.66252			17.9844	4.34236	1.6924
		1.04899	16.9987	1.63612			10.7234	6.7997	3.52399
		1.05354	7.83312	1.30305			1.15097	5.20421	2.92975
		1.61949	7.21957	1.18679			3.23767	7.40512	3.91079
		1.14518	27.4051	1.73385			4.7745	7.58555	2.04574
		2.1585	14.0361	3.84401			3.29331	2.04425	1.96409
		5.92845	19.0817	4.57585			4.7928	1.54741	1.57663
		6.49369	2.15785	1.46369			12.8255	1.19998	1.86505
		3.26206	5.06464	1.86584			4.8155	2.80684	2.9351
		2.11198	4.94269	5.62616			7.36712	1.72112	2.27594
		1.28055	6.01982	3.95634			1.37282	5.69278	1.87643
		2.29911	8.2707	3.67326			13.0861	2.21693	3.65783
		1.96892	6.81876	5.71041			57.6806	2.95626	1.04863
		1.43585	4.94583	1.05087			7.02007	2.59952	2.00425
		1.57577	11.2537	1.83439			20.3581	6.79711	6.61234
		5.03056	8.09092	1.2306			12.3657	4.27876	2.74973
		5.75775	15.0236	1.12051			8.59498	1.67718	2.69887
		1.09062	12.5066	1.97592			4.46625	6.49466	2.06648
		1.42221	13.1161	3.46994			3.3431	2.80425	2.03905
		1.55863	17.5183	6.60288			25.1435	3.77313	1.00045
		1.53134	11.9695	4.31243			4.80379	6.9031	2.0725
		1.53344	16.8655	1.85685			2.91698	2.80943	2.94179
		1.05704	34.9385	1.15197			3.04071	4.59569	1.46889
		6.79136	2.66895	7.25891			3.63084	1.83228	1.2601
		9.94709	11.8511	3.14081			1.42847	5.31123	1.62414
		3.49572	12.3815	1.53502			1.00747	1.75111	2.70222
		5.46009	5.4047	2.6926			1.02065	1.39541	3.62437
		2.60237	9.30277	1.40134			7.72223	5.52579	1.98484
		7.35451	2.86129	2.37246			3.12491	6.33181	2.25386
		5.37649	3.13046	3.53903			32.2244	3.42673	1.39528
		1.43376	3.35801	2.04445			34.3931	6.33181	5.85012
		1.88532	3.67026	2.05849			8.06342	1.99359	2.83673
		19.0334	4.83261	1.4137			13.1418	4.04094	1.08611
		6.14951	4.62034	3.05544			13.4134	5.05376	1.31765
		7.9208	33.2442	2.72855			20.6055	5.23265	4.32837
		1.49322	7.94682	3.7811			3.55982	1.16689	1.19117
		6.99178	5.94423	4.06305			16.9762	2.29552	1.17444
		4.5678	2.11439	1.78103			15.8691	9.05903	1.25876
		1.29419	3.83427	1.5294			13.7612	3.6599	1.81286
		2.62966	7.80645	1.4738			12.0267	1.67666	4.05065
		7.98901	17.7913	6.49617			3.7209	2.50336	1.64154
		1.33162	7.00611	2.13263			23.8132	12.6657	1.31096
		3.16622	7.09722	7.31676			2.49305	4.81025	1.03726
		2.8878	1.38694	1.22891			8.03194	1.59342	1.79211
		2.14661	3.74217	2.3264			52.5488	5.43376	1.64823
		2.15326	8.59005	1.47492			7.98288	3.69868	2.9351
		5.65877	3.78748	1.56142			12.9426	23.3321	2.4158
		1.58136	6.72488	1.99333			8.70114	7.17091	1.23601
		4.63111	2.29465	2.18542			3.8461	5.81635	1.34576
		5.42336	1.31946	1.49514			5.18818	3.44328	1.17109
		1.46943	5.52953	1.78721			6.88902	29.2094	1.02722
		1.45544	1.4948	2.11971			5.27604	12.1451	1.64489
		7.69135	6.77117	1.23565			9.42306	5.04859	2.11132
		4.11973	3.1344	3.18181			9.84187	14.6386	1.72921
		6.97674	6.34514	1.70296			7.67463	40.6286	1.85033
		6.29187	1.22638	1.83045			11.6533	3.70954	1.85234
		1.68735	3.63283	2.73192			7.80423	7.34359	1.94937
		5.07603	3.91061	3.23685			6.04116	5.64522	1.01919
		9.6942	3.87515	1.59624			8.19814	7.26449	1.66898
		7.81482	4.73706	1.05424			7.69953	43.4267	3.16932
		6.37372	1.20865	2.49771			16.8795	21.7449	2.67679
		5.86374	7.98179	2.28764			2.98507	5.87374	1.85769
		1.29209	1.81937	3.39468			36.0302	16.6032	1.95874
		2.1543	6.23039	2.38369			1.63567	14.7254	5.72699
		4.49294	7.58334	1.39629			4.15728	11.1017	4.07474
		1.01052	1.90458	2.58027			15.4276	19.0114	3.43164
		2.41419	2.72659	1.52098			2.02006	2.87715	1.3839
		2.58873	1.04414	1.56198			27.0099	2.35653	1.90253
		1.9224	4.57749	1.0402			2.78885	86.5643	6.92887
		4.0746	4.6952	1.22948			13.7026	12.6109	1.0841
		2.53522	11.8505	2.17868			6.5837	24.2244	4.24673
		4.20542	2.75959	2.29663			13.0349	13.0726	2.8133
		5.55103	12.0791	1.881			6.8158	26.0422	2.07451
		1.3652	5.71422	1.10142			2.48353	9.00836	2.5396
		1.06963	21.3779	2.56061			4.9656	4.64274	4.04998
		1.07208	7.54345	2.05062			1.21175	14.62	6.07631
		2.59083	1.53469	1.34069			4.15581	8.10773	4.17646
		12.2088	1.56129	1.32103			4.53801	32.4247	3.12783
		10.4112	5.9334	1.3727			2.84376	5.18611	2.01495
		1.19345	5.10251	1.59006			6.48119	43.952	3.37275
		8.76273	2.30795	1.31934			39.0014	8.33832	9.64983
		2.9707	5.88611	1.0694			18.3036	3.68369	8.91103
		2.56285	6.29786	1.49739			12.8592	13.7783	4.98017
		11.1958	2.22521	1.93773			27.1665	4.17795	8.59249
		8.07296	2.04248	1.19521			14.9766	14.225	3.77963
		5.74621	5.5645	1.22779			3.86953	4.36304	3.50927
		1.61144	5.58666	1.37326			4.46698	5.33398	3.19408
		3.26241	9.90607	1.60803			17.8877	3.18477	7.97951
		3.2012	2.88272	1.38674			8.13956	6.96669	3.44168
		4.2467	2.22275	1.05592			11.6635	44.5982	2.16619
		1.21514	1.89227	1.58332			35.4774	2.32499	4.01853
		5.17012	2.02475	1.23172			22.3188	2.48526	6.49188
		1.43585	5.80485	1.40415			17.0494	8.79535	5.73167
		1.24592	3.30678	2.13094			14.2649	7.24691	4.11824
		4.28203	6.33776	2.64486			26.9601	8.71366	2.43454
		9.10586	4.7809	1.339			6.84215	27.5524	5.64401
		5.46709	4.36521	1.53502			32.2112	16.3401	7.65829
		3.56043	1.40812	1.05985			16.4505	14.9359	2.7243
		2.49464	2.55224	1.68667			8.45293	19.4313	3.34666
		3.93714	3.67962	1.3609			21.4746	12.9325	10.6476
		4.49224	2.11144	1.86415			19.4465	11.1932	4.32971
		1.90351	18.7641	2.45895			6.21322	22.3534	6.55278
		2.54781	5.63197	1.46481			6.33622	9.46953	5.28398
		2.29212	11.2388	1.0093			20.2468	11.7449	6.31655
		2.29387	4.85379	1.97087			5.60991	27.1063	3.93555
		14.297	7.67544	4.56181			7.51795	5.70467	6.86663
		1.82586	1.52928	2.04164			9.99416	20.3541	2.6527
		4.54891	4.21795	2.44098			3.30137	5.95077	6.57085
		1.34071	2.43601	2.76674			22.9536	3.64026	2.16151
		1.29454	1.03429	1.14747			4.96926	17.1466	5.3315
		2.01439	3.59392	1.10647			6.28277	36.1973	9.97506
		1.60655	6.07968	1.40191			13.0188	22.1714	3.1372
		2.29597	1.17762	2.05905			14.12	31.0795	5.70691
		1.23543	3.49739	1.44178			8.10076	51.8555	2.36494
		21.7659	2.52023	3.84962			21.9447	17.9552	4.23936
		2.38726	3.42745	7.20555			2.72368	5.87063	5.62795
		5.12605	4.23026	2.63756			3.46098	1.39489	4.24606
		1.09691	13.6143	3.40591			8.41267	21.1079	4.89718
		3.22778	6.64016	2.17531			4.05843	8.90134	5.38302
		6.49614	13.9561	1.75912			2.74492	7.18073	1.73657
		3.57687	1.1855	4.76906			8.7934	5.77654	4.38057
		5.31598	3.62889	2.63531			4.58633	7.72721	2.18292
		1.15498	3.97169	4.81793			1.95417	2.01065	7.17647
		2.2358	3.3452	1.53614			7.20458	6.06141	2.08522
		1.3617	2.634	5.00945			20.022	5.45237	2.08723
		1.52575	5.02913	1.78552			9.00133	18.7891	4.37789
		1.04515	1.65438	3.84288			3.91346	21.4186	4.61077
		1.10286	11.066	1.51929			46.6196	4.83041	9.48788
		4.8053	5.18427	1.81697			9.22977	14.3935	4.63553
		8.24505	5.45417	2.36403			5.36463	12.3999	4.82692
		80.2339	4.36718	2.03827			19.0855	5.10805	1.54719
		7.30484	2.34489	2.85773			39.1647	4.46489	2.47469
		2.41734	10.105	1.339			16.6855	39.1893	2.18292
		2.32955	5.42758	1.59736			3.67917	7.60416	8.77786
		1.79473	3.10288	4.80669			23.9691	15.0015	2.46064
		2.20852	1.67506	3.45534			9.9063	23.2711	2.07585
		2.49849	5.85706	1.00818			3.17324	9.64377	3.04485
		1.05214	20.577	2.16576			26.2813	11.8721	1.80014
		10.818	1.71791	1.57827			11.8114	7.61037	2.26925
		4.68078	4.95525	1.72823			14.4677	21.1782	1.9206
		21.6008	3.25014	1.29519			2.04057	12.2293	8.72098
		6.51328	3.32698	1.43055			2.97482	8.4898	1.62013
		6.27508	10.9625	1.26992			12.5143	14.1024	4.65494
		9.98171	3.18168	2.44098			10.8288	1.44297	2.32881
		2.40055	13.7128	1.08064			7.93529	15.7838	4.2581
		5.02531	3.63234	1.55355			20.7835	4.1128	7.28154
		1.10146	6.99182	4.61011			5.5301	18.0943	8.84813
		1.79018	5.06853	1.46369			15.3046	5.46168	3.46377
		1.17946	3.51857	1.52154			4.19389	1.5076	3.01206
		1.07208	2.01983	2.68418			2.94114	44.5015	2.37833
		2.62721	2.13114	1.81136			3.36067	8.52186	2.02164
		3.80947	1.90064	1.14803			1.34061	22.7158	5.37499
		2.44533	4.51001	4.76963			30.4899	43.4246	1.14098
		5.71543	20.6381	3.56992			7.15552	8.64749	4.51039
		10.3819	3.75941	5.01395			5.4891	39.1422	3.05087
		11.6603	1.64797	1.23846			8.30797	14.6339	1.38925
		1.5156	2.70886	6.06088			5.95549	7.57418	5.21572
		5.85569	1.12245	2.05736			8.67478	15.0129	3.44704
		1.69609	1.29484	2.87739			5.47226	2.13473	5.82536
		4.3303	1.01804	3.90186			11.6965	9.22861	2.29334
		3.62898	1.29976	1.13175			2.4623	1.07228	6.44839
		1.19415	2.34883	1.33788			15.4928	7.55195	1.3752
		95.2483	4.67304	2.13487			3.01289	21.3287	1.90387
		1.08502	6.35253	2.21688			6.14073	13.3419	1.66429
		2.08085	6.08657	2.07253			2.87817	9.4535	1.15704
		3.50866	1.17368	2.19946			3.39069	3.34039	3.48919
		1.41906	2.04642	1.46144			4.55119	17.553	1.64489
		15.2624	6.05209	1.93324			7.40959	60.7951	1.75397
		3.39708	1.33916	4.94599			1.42188	5.12459	3.6411
		1.2043	1.22391	2.0641			8.15348	4.35993	3.63039
		1.10531	1.30222	1.03963			4.96193	4.70633	1.90855
		1.77059	1.11556	2.36235			10.5177	7.05665	3.08835
		1.12805	1.1722	2.00176			13.2399	22.4563	2.42718
		1.10531	9.44211	1.21263			2.61898	43.5326	2.07184
		1.33547	6.58155	1.43954			20.2848	12.2929	7.75533
		2.07735	5.13699	2.25226			13.74	35.8928	2.37565
		1.86434	1.12196	2.53421			1.24908	12.3746	3.60363
		1.34036	8.55656	2.0832			14.7767	13.4836	1.97748
		4.4083	4.52035	1.12838			5.72632	2.4196	2.09526
		1.01577	2.73497	2.72799			49.6596	75.3566	2.20501
		1.61074	2.49265	1.53951			4.8792	8.91478	2.44391
		1.21129	3.81507	1.22498			10.1311	7.31826	2.40978
		3.74371	3.94509	1.24913			10.5653	5.55629	5.50816
		1.43061	6.53033	1.10479			14.6574	5.41308	1.52242
		1.93289	5.4	2.27417			18.5855	15.4565	1.67433
		10.4036	5.84721	1.04918			3.58545	21.2248	2.65537
		5.03056	7.02334	1.89167			23.986	6.39902	1.30694
		1.9133	3.63086	2.41177			5.57696	2.32137	3.09303
		4.71995	4.49671	1.56816			5.15523	28.4303	2.98395
		10.6341	5.15866	1.01155			20.7549	4.33925	3.98306
		1.1249	7.3883	1.10366			44.4239	4.49281	3.41291
		3.46004	1.08749	1.55861			11.3187	11.0759	1.93398
		7.17297	3.75793	1.74171			1.97979	3.61079	3.38212
		4.25824	4.9454	2.58196			4.98024	6.15757	5.1314
		8.61232	4.75923	1.70239			7.31148	5.0124	2.62058
		2.13367	1.32833	1.1413			39.7921	35.3257	4.03258
		1.06508	8.40092	1.05311			12.0545	12.1616	1.77739
		3.10466	4.92619	2.12476			8.13517	7.07527	2.67612
		3.00113	9.39828	2.13094			6.51487	1.61513	3.19006
		1.18296	7.88082	1.45582			66.7119	7.54264	5.24182
		11.2402	4.97938	1.97592			5.89179	13.0845	2.62727
		1.40472	2.8714	1.8855			6.17075	11.1038	1.39595
		4.15016	18.2824	1.15758			1.94245	18.5715	2.65069
		8.95161	7.20607	1.4064			8.00338	8.27627	1.95004
		2.61147	4.92915	1.11153			1.95856	12.8777	1.71315
		5.70004	4.30069	1.34012			3.48295	11.5805	1.24136
		1.38478	3.27231	1.22835			10.2306	3.92616	4.03124
		3.33027	2.86302	1.92257			21.6701	15.8985	1.64087
		3.22883	2.03214	2.15565			1.48851	26.461	2.70222
		2.04377	3.82344	2.64149			11.1224	31.9579	1.87108
		2.22251	1.53716	7.47514			3.32699	14.0476	6.06627
		3.94414	7.32477	3.36884			11.919	18.3455	1.93532
		2.02419	1.82036	3.86086			4.93118	11.5593	4.07474
		1.65202	2.601	1.70015			8.18862	2.52714	5.04976
		1.97417	1.12196	1.48728			20.0498	17.5612	2.02165
		2.2456	1.84695	1.90234			29.8155	6.46519	2.15013
		1.12105	4.32581	5.5919			4.17704	15.6814	2.30739
		8.22161	2.4429	4.15517			21.5998	4.54502	1.57997
		1.46558	3.28511	2.43368			8.32041	6.96462	1.55856
		1.13469	3.91702	5.23075			11.2367	14.6743	2.48406
		1.48342	4.17953	6.19287			27.6556	27.1006	6.4089
		2.19733	6.8879	2.67294			6.45996	6.49932	1.92461
		9.82851	4.19775	2.80999			3.6162	6.24443	3.50659
		1.97801	3.93376	2.59824			11.5778	5.03928	3.21215
		1.07348	1.52583	2.75775			10.7351	23.9711	1.3665
		1.49916	1.49529	7.79754			54.8075	12.8714	1.29155
		1.94688	2.80835	3.56767			14.0958	22.5426	2.50882
		1.40332	6.34219	1.78608			25.1531	31.6818	3.2523
		1.08152	3.86629	2.20789			15.2556	29.6225	4.79681
		2.36417	1.63862	8.63666			4.77084	6.73714	1.98752
		2.9672	7.72666	1.55861			15.9921	6.80435	4.50035
		1.98081	3.94755	1.29126			8.09051	30.3691	2.24917
		29.5894	1.17565	6.31981			11.5991	16.0417	1.08209
		1.59955	2.1927	1.69453			1.4475	11.6379	1.86639
		2.09589	8.03548	3.67214			11.1034	2.35601	1.27482
		1.06369	5.10596	8.75966			2.85328	6.86588	3.28977
		3.26731	2.67488	4.44386			1.32084	6.4197	2.56436
		15.0368	4.86512	1.36147			4.76352	6.02677	2.48741
		1.10706	2.67636	1.08232			2.73613	8.13151	3.71873
		15.1322	1.87059	2.21013			4.92972	4.42094	1.83829
		2.64925	13.9777	2.34325			10.235	4.50832	2.74438
		2.61567	4.33664	1.82203			19.2444	6.16998	1.50569
		10.7177	5.95162	1.70633			20.2255	17.9914	6.17134
		4.60697	3.33141	1.92088			2.80422	5.78946	1.63619
		1.58801	6.05012	1.71756			5.92035	2.46665	2.46265
		1.89931	6.46926	1.76699			1.12315	4.17329	4.09549
		4.6409	3.14671	3.13294			20.8947	6.61771	3.82379
		44.4649	3.5629	3.05656			18.8988	22.7122	1.8162
		7.29504	3.69932	1.42887			2.146	2.51887	2.88625
		1.58276	1.46377	1.20476			2.4601	5.37844	3.87666
		19.358	4.17263	1.53727			3.41046	5.54647	2.25854
		1.81851	4.69865	1.51143			3.02168	26.1679	3.44704
		5.2838	3.85397	1.27722			11.2894	19.2643	3.21081
		5.20755	6.40474	6.39788			13.1842	39.9503	2.3984
		15.4971	3.00832	2.0905			16.4658	18.0276	1.98484
		1.76815	2.03805	1.67431			18.7568	13.769	1.36784
		9.29649	6.35647	4.0799			7.50404	1.11209	1.84632
		2.42224	5.10645	1.35473			3.16006	15.6457	2.38167
		4.43313	3.51019	1.29238			17.6285	53.2369	1.79947
		1.82796	4.07216	1.71307			5.72193	21.1307	1.04863
		1.18576	2.99009	1.61309			7.81814	76.6041	2.62727
		1.93569	11.0778	1.82315			8.17837	14.4519	2.90699
		1.63733	13.3192	1.81192			17.2537	38.3801	4.16709
		4.10783	5.62459	2.71282			23.6074	28.1754	3.42964
		1.63348	5.03208	1.20476			11.0434	13.7886	1.90186
		1.46069	2.93493	1.80911			14.3037	51.0722	1.52979
		2.03188	2.26363	1.91863			31.0463	6.74231	1.48963
		1.39283	2.90045	1.76193			14.1178	12.0789	1.40866
		5.29359	3.11815	1.37158			3.60229	8.71315	2.38033
		2.2449	10.0523	2.99141			9.44869	7.14558	1.27616
		1.67405	5.30986	2.94535			8.90395	5.70157	2.52555
		1.58661	1.56277	2.29888			6.96077	18.5296	2.92707
		1.70728	5.67335	2.85043			34.7321	8.77933	4.28955
		18.5982	1.0338	4.395			13.1491	9.65204	1.54852
		9.58297	2.83446	1.74283			26.6306	5.12459	2.0444
		2.52157	2.45916	1.70127			5.70948	13.1786	3.98239
		2.59048	5.80091	1.61983			11.971	11.0252	2.35022
		4.26943	6.35598	1.14242			9.31031	11.3701	1.74794
		7.29435	5.04637	1.21656			2.5443	11.793	3.56281
		4.40445	2.96645	1.10142			1.46947	8.77519	1.37185
		4.97249	3.6875	1.922			30.3639	20.745	1.20522
		4.74968	3.47867	1.41876			11.5456	6.19687	1.50971
		1.87203	2.29071	1.40022			25.3486	6.22634	3.11913
		5.99176	1.40615	1.25475			6.86192	18.3042	3.5869
		6.12957	4.92471	1.09243			23.707	33.588	2.41781
		4.10853	1.90507	1.84337			15.1223	16.7407	1.46287
		6.28592	1.30075	1.02447			1.33548	16.9765	2.85413
		1.66881	1.35492	1.47829			2.82985	21.1544	1.00915
		2.58768	2.29318	2.98354			7.47914	4.79681	2.20701
		6.86656	2.95266	1.93211			2.49158	4.30306	1.42539
		3.10011	2.66355	1.02952			2.31733	6.4047	1.79479
		15.2463	10.1558	2.43087			5.24162	15.1613	2.13942
		4.487	3.51906	1.87819			18.4449	9.50469	1.55789
		9.24368	3.97366	1.70576			22.3554	8.7147	2.44056
		11.5589	6.4402	1.26261			11.0595	10.3505	1.25943
		5.05994	11.1275	1.15871			4.0145	4.5321	2.67411
		1.55163	9.1072	1.59118			10.8735	5.70416	2.86349
		2.27253	7.95519	1.81136			16.6511	19.1169	3.08366
		1.26166	1.74303	1.39517			1.74696	19.0332	3.41224
		1.64327	5.84179	1.18791			1.45556	8.59527	1.28486
		6.66334	4.74347	1.40752			2.49817	6.1281	1.08142
		4.49854	7.05487	1.85741			5.45835	3.81397	1.45283
		8.64275	2.70098	1.18847			5.15742	2.07682	4.64824
		9.80787	3.74611	1.10591			5.48397	5.04497	4.49098
		1.16582	4.61393	3.09924			2.13721	8.64387	1.48294
		3.87033	12.8499	1.12108			8.01143	6.60634	1.80549
		3.95778	1.34606	1.25924			6.25935	7.28103	2.2311
		5.21769	6.29688	1.09243			7.93309	11.3416	1.56525
		3.5975	4.81685	1.0767			5.90644	18.2649	1.69976
		3.3614	3.08909	3.47331			8.53567	11.535	3.54541
		2.77692	4.70554	1.922			5.64725	5.51907	1.1731
		3.39463	7.32329	1.00425			8.40461	59.0734	1.20723
		1.41207	1.31158	1.60579			5.95842	19.0714	1.39996
		2.73144	4.57946	1.47998			6.52805	11.9951	1.22798
		3.67061	3.04279	1.64679			25.2234	14.3511	2.25185
		1.51805	4.73214	1.40022			26.192	7.52558	1.37654
		1.30818	8.51814	5.15268			8.51078	8.93443	1.55521
		1.01996	4.19726	1.44403			3.30429	28.4448	1.33304
		5.46778	2.48575	1.28339			9.58121	19.0202	1.30159
		3.77379	10.1538	2.44547			28.021	7.07837	1.19251
		4.7245	8.18766	1.31204			24.3828	9.07454	1.41401
		9.02262	3.21025	1.02391			4.18437	27.7473	1.55521
		1.15078	10.7956	2.26181			15.2233	9.87073	2.13876
		1.75485	7.34299	5.76826			8.2245	11.3044	7.5104
		7.95613	6.03288	5.49473			3.74946	20.7408	6.20346
		1.27041	5.22909	1.39573			15.03	13.8429	2.9719
		1.37219	2.93936	1.66813			36.1203	3.62372	9.67793
		1.53834	1.27809	1.82034			4.13311	9.89606	3.78097
		1.81886	25.1338	4.24054			6.47973	18.5601	4.69174
		3.37434	2.61332	2.25226			9.01085	2.50956	9.04822
		4.69931	1.92182	3.44467			4.56729	7.73394	3.74215
		3.24073	1.44506	4.80276			3.29405	13.7514	7.63755
		2.73389	7.52867	1.47492			17.3276	24.3754	4.64891
		1.05109	9.38843	3.41153			4.06795	6.25529	8.61391
		1.18471	4.2869	1.35304			7.2346	68.028	4.39529
		1.14448	1.98535	2.1725			5.10398	5.83444	5.44593
		21.1006	5.07296	1.92762			18.7685	8.89152	2.26456
		1.90106	3.12504	2.0714			4.77011	4.54554	9.01877
		1.1144	9.4165	2.09162			6.44385	14.7347	7.19052
		1.22494	9.59184	1.33451			12.9075	27.4956	3.23892
		1.56912	10.271	2.28034			6.03384	21.4409	7.34377
		1.03081	4.5174	2.35392			10.9914	1.02057	1.01986
		1.71218	7.66165	3.17001			10.8779	2.45889	7.21662
		6.70601	2.61134	3.17675			35.1018	30.1308	2.92305
		4.8805	2.80146	2.71114			3.75751	13.5642	2.91636
		3.29494	2.34243	1.1222			21.6965	6.93619	1.10484
		7.11735	2.601	1.31597			3.48295	6.79195	2.65671
		7.78718	2.76797	1.75351			1.79675	15.4043	3.40956
		13.9084	6.89677	1.67094			4.61928	11.156	4.96344
		3.26031	19.2418	1.42493			1.45556	22.9707	2.85078
		29.6968	3.3186	2.07534			7.2529	37.4837	9.60499
		1.4348	4.94294	2.21631			2.26461	65.3964	1.58934
		3.43241	4.19825	1.3199			2.34662	1.29149	3.13184
		3.47018	6.85195	2.04388			39.0724	2.04581	7.37656
		12.3064	3.32747	10.7204			11.5185	10.7796	5.78923
		10.6736	3.16691	2.06804			6.55954	5.10649	8.31143
		2.13017	3.42154	5.72108			17.5165	6.46933	6.44169
		8.75783	6.14863	2.10117			4.97731	5.1613	3.34398
		4.55101	2.66503	2.15004			23.8183	14.0254	3.02009
		1.31273	2.97384	4.64213			28.904	17.3637	5.0424
		1.1966	1.22933	1.88381			5.41369	2.88594	2.97659
		4.07496	3.07727	1.86022			7.54504	3.40347	2.98261
		2.36172	3.0162	1.89954			8.67844	12.4294	1.78341
		2.52577	2.23703	1.17162			43.453	13.4221	3.76959
		8.29682	10.7108	1.58557			19.4106	16.5107	6.12985
		4.91968	1.84153	1.08681			16.6694	20.4978	2.05979
		2.29946	2.64681	3.36266			3.09489	34.9053	3.11311
		1.10986	3.89042	1.9939			8.52688	4.92451	2.88892
		4.68218	2.8182	3.87434			23.2267	12.5845	3.00269
		1.51071	1.93511	3.15653			21.7734	19.4251	8.82404
		1.18891	6.67464	1.30755			5.62162	16.6678	4.49366
		1.74191	5.17836	1.34799			4.51824	30.0723	4.21327
		3.46424	4.01109	1.9939			24.4194	18.9163	4.81688
		1.23193	5.65463	1.02615			18.0444	3.28249	6.09839
		1.81641	14.4116	3.95128			20.3793	14.9653	2.82937
		2.98923	7.66461	1.47436			15.1545	14.3196	4.43879
		1.66706	6.47665	1.35248			32.5107	6.75317	4.74929
		4.95815	14.0506	1.19578			8.25598	19.3982	2.17355
		3.88642	2.96645	1.54007			25.1487	19.7673	2.69553
		1.08292	5.13502	1.38393			12.5948	15.3945	4.04195
		2.47156	7.2499	1.27329			5.48837	5.26418	6.74952
		1.10216	1.70363	1.13343			4.35277	5.53613	1.78743
		3.22114	1.71151	2.09443			5.17573	5.19077	1.51774
		6.35868	2.91769	1.0885			9.60098	16.3277	5.08724
		1.05809	2.09124	3.00994			10.1142	55.7542	5.86953
		2.33444	5.73048	1.13175			15.7007	22.0959	4.22464
		4.26629	1.95235	2.97961			6.72794	16.2217	5.22978
		4.92667	1.81149	3.01387			10.0169	6.41505	1.5512
		3.86299	1.88783	2.81673			4.69176	10.1794	3.64177
		1.01472	3.47572	2.49097			1.47167	8.75709	1.64756
		1.13994	1.03922	3.78054			9.40842	59.2502	6.93155
		1.10706	2.74679	2.19216			3.97936	12.2645	6.2851
		1.42606	4.30906	1.07109			9.59586	40.4208	3.36472
		1.14064	5.06459	2.12926			3.46537	20.852	3.73546
		1.03745	6.34958	1.27104			1.40724	3.34143	1.87777
		7.56857	11.1743	5.04315			30.7578	7.39167	2.54496
		4.9655	2.22324	6.23781			15.886	27.113	2.21504
		11.278	4.79567	1.79395			13.3914	6.43831	4.18248
		1.94898	4.24947	1.5148			9.06137	12.4573	2.47402
		1.94234	7.06422	1.84			13.863	16.6901	2.83606
		6.51923	2.30155	1.02728			15.9526	26.0422	2.2485
		3.07633	3.60131	2.35898			8.73336	8.62009	1.17578
		14.9609	5.15472	1.18398			1.65251	3.07052	6.51597
		2.90599	3.0556	1.23846			1.86118	16.4853	2.35691
		1.32252	13.3769	1.06828			9.05698	17.6941	2.64534
		4.3978	1.75879	2.43761			3.73701	10.1184	2.50815
		5.60315	1.9824	1.3244			5.98332	30.7093	4.01318
		6.32965	4.12929	2.98354			1.58662	19.2808	3.13787
		9.41507	2.71871	1.44403			13.6572	3.28197	3.85993
		2.35123	5.15275	1.34911			7.17456	9.0673	1.73255
		6.23975	5.2946	1.71868			1.49217	4.09471	5.55969
		5.32367	6.07475	1.66195			2.07571	6.01385	5.70022
		7.39543	4.07413	2.69991			9.0211	5.73053	2.44993
		1.49322	5.78416	1.28396			23.5884	7.25208	1.21727
		3.5982	2.31485	1.83944			10.112	9.04248	4.44949
		19.0134	2.57638	1.14804			5.60844	2.56385	1.36851
		3.88992	4.51247	2.49939			9.42453	16.6337	2.61991
		3.18686	5.69009	1.09917			8.96985	16.9915	3.1459
		6.57764	5.45664	1.60579			5.84859	11.7242	5.93645
		1.00667	6.78792	1.93885			18.8659	22.7225	3.2436
		7.9285	3.7269	1.63724			2.91478	5.84996	3.66787
		6.12712	2.21043	1.11096			4.82648	12.3027	7.4408
		1.24277	2.17743	1.33114			15.845	7.16574	2.52689
		3.06199	1.53962	1.11658			9.49262	22.2557	1.82892
		15.5625	3.05954	1.41426			3.62865	19.164	5.88827
		3.12145	2.07794	1.29912			5.11496	6.14516	3.40488
		4.11203	6.12302	2.09837			6.24983	10.8675	5.55434
		3.06479	1.14314	1.37832			13.4676	26.7717	3.11444
		2.35193	3.13933	2.45895			11.6232	15.8804	5.6313
		2.23056	1.89029	1.98098			30.0162	7.2252	3.57552
		2.37012	6.22103	2.27473			13.1366	9.70219	4.0995
		1.42396	2.92508	1.60747			20.1999	5.63281	2.65069
		1.3547	1.18106	2.23597			16.43	6.75265	2.80862
		6.01205	7.30802	2.00232			33.2055	10.457	4.92195
		1.2036	5.92305	5.04091			15.9043	15.2435	3.49723
		1.09307	2.00308	1.00256			3.29917	14.346	3.88937
		1.6737	9.0614	3.4486			1.70816	23.6335	3.1285
		1.23928	1.28893	4.05912			5.81565	26.4285	6.41091
		1.6076	7.28142	3.38962			5.49935	9.97155	2.85145
		1.63208	7.67298	4.31356			9.72984	30.2569	2.90766
		2.18509	1.76963	1.51311			2.22068	7.62484	6.50594
		3.51076	7.27059	6.67141			1.67082	21.3483	2.64132
		1.11895	6.79531	1.69228			20.7608	22.9671	3.10909
		1.1931	2.31534	2.84481			5.77172	35.1287	3.46109
		1.3659	1.85976	2.79258			4.01816	30.8665	6.09505
		2.13577	3.01127	1.59624			2.83424	15.9244	2.87956
		1.33127	4.77893	2.52523			1.16415	76.0494	2.1334
		1.41627	1.21456	2.37133			9.85212	6.34111	3.15593
		5.72243	2.49954	11.3652			1.0492	44.7564	5.35291
		68.1126	1.14166	1.23902			31.7236	7.79804	9.57354
		17.8182	2.19566	1.22498			2.55675	37.5938	2.86818
		13.106	21.2257	1.00874			5.57476	27.6641	2.75174
		1.31518	7.30704	2.1287			8.10222	18.906	4.64155
		1.57682	3.59491	4.64381			5.16182	24.3459	1.39461
		2.61742	3.01373	4.30569			2.7559	8.05603	2.6634
		3.51635	8.19308	4.17595			1.16415	11.2599	2.72296
		41.4704	8.76293	1.2907			3.66233	41.612	2.98864
		1.30119	1.03577	3.21326			21.8473	9.13348	1.29155
		2.01054	5.59602	9.56677			15.3039	10.7409	1.61009
		29.46	1.59774	6.88821			12.5048	4.28187	8.11268
		5.30164	7.22035	2.98242			1.5771	7.19469	1.22262
		4.97494	5.16802	1.03514			9.29859	3.45724	2.3094
		3.39288	9.41995	2.63082			3.62719	2.97177	2.34018
		8.10129	2.11193	1.79282			5.88154	12.6269	3.30985
		5.62938	8.6728	1.12164			4.88799	20.4306	4.75599
		14.7853	8.52455	4.49329			6.79749	12.4589	2.35691
		44.7678	7.56709	2.31011			16.1254	22.5447	2.70556
		2.10324	3.66928	1.67375			3.73921	51.9951	2.02031
		1.32322	3.87072	1.74845			9.56511	6.43986	1.83828
		5.11206	4.75972	1.52266			3.81316	20.4673	2.84141
		3.07773	2.24737	1.86415			21.985	4.16812	1.56525
		4.39221	4.76465	1.43224			40.3691	40.3143	2.20835
		1.97137	5.71521	1.88774			3.10514	3.55495	4.76469
		5.42162	4.83902	2.71507			6.77772	4.11022	3.32859
		3.50061	7.11101	1.59568			10.8962	30.4275	2.99265
		6.21492	3.73675	1.55355			3.05682	11.7428	4.15906
		4.47825	1.99668	1.62039			14.169	6.45175	2.47001
		5.56503	1.39482	3.21551			28.628	10.3236	4.89719
		2.22286	7.0726	2.07477			3.22595	7.00599	3.29981
		5.48527	3.79438	2.1096			7.1936	2.01116	2.25319
		2.34773	8.32803	1.5777			3.7868	33.2623	2.64065
		3.25402	7.24596	2.07253			3.78826	4.81904	4.58802
		7.9299	2.69803	1.26879			18.7656	11.2232	2.94648
		13.999	4.24848	2.26181			2.87012	8.92305	1.4903
		1.22284	2.71083	2.15397			14.8982	25.1607	2.51618
		1.71813	6.20675	1.35697			17.7442	33.8744	2.76178
		7.63748	13.9418	2.35617			9.40476	4.05903	3.49388
		4.1701	3.18907	2.11072			25.4445	4.72649	2.67344
		6.12362	5.43201	1.37382			7.40886	11.0878	2.00625
		2.45267	4.39624	1.59905			5.76147	48.7948	1.61678
		3.56847	3.5294	1.24183			7.76835	10.3159	3.24293
		3.22079	4.15343	1.15983			4.95095	4.00785	5.13743
		5.85254	2.31386	1.76361			4.23269	12.8895	2.65604
		3.43485	4.11058	1.15084			5.96282	11.9233	3.70133
		3.68985	2.61824	1.36371			4.38132	14.7596	4.47091
		9.60605	3.33092	1.06322			3.36287	29.759	1.61343
		1.0406	5.2286	1.6114			9.93192	10.1447	2.9873
		2.54781	2.89504	1.1149			10.7878	17.8192	2.24449
		1.29594	4.16328	1.61421			9.40988	33.1961	3.33327
		3.56148	3.00044	2.04051			5.78783	24.8779	3.15058
		3.34601	3.55206	1.78777			18.3219	46.7815	2.13608
		2.73809	2.60937	1.32496			12.8606	8.92771	2.116
		5.87913	10.7773	1.08401			4.78036	5.92957	1.9467
		1.51141	5.72999	1.29856			14.5849	42.8714	4.97615
		4.16835	5.80633	1.92537			4.47724	6.89173	3.18939
		1.26796	4.9124	1.01155			3.76703	31.6415	4.56125
		1.85979	3.11027	2.02423			1.24836	9.86711	3.51931
		1.6807	4.34502	1.06266			2.04862	6.03763	2.85613
		2.76607	2.81426	1.68891			4.95461	47.0312	2.05243
		1.46034	1.31897	2.0568			2.63143	16.1281	2.22575
		2.64225	4.70554	1.35753			5.07689	20.3986	1.98752
		2.57404	1.15742	1.04974			1.07629	7.1006	3.13452
		1.50056	1.9952	1.11602			13.4017	9.0704	1.97614
		2.06476	4.17116	1.19241			5.90278	9.06161	2.79992
		1.68035	2.82559	1.33114			6.12902	15.9564	2.24716
		1.65656	8.8176	1.11883			12.895	7.68327	3.22754
		2.71256	2.09272	1.42044			13.4024	20.5278	3.75219
		1.09866	6.05012	1.25587			8.50931	3.13049	2.34554
		1.07803	2.5813	1.40247			4.29493	14.6448	3.06292
		6.04492	4.88236	1.32552			3.57813	47.4242	1.17578
		1.44915	6.6574	1.87089			38.893	6.39385	3.24025
		1.50651	3.14622	1.13231			34.2218	9.56621	2.93309
		2.42259	5.49555	1.38449			22.8167	6.26304	3.89807
		1.14658	3.22404	2.0422			11.0697	8.11342	3.52533
		1.04025	4.28444	1.23004			11.7404	56.2697	3.4022
		6.92567	1.93561	1.25868			11.7484	7.05976	7.51642
		28.2235	2.69754	1.86752			8.409	8.3559	1.34643
		1.41592	3.23685	1.01043			7.39128	1.03143	3.94291
		5.33067	2.22127	1.83888			10.7761	1.3375	2.32211
		1.96437	5.68517	1.45639			6.74917	8.94477	4.1691
		7.62558	2.00456	1.42381			13.0649	2.81822	1.1189
		1.10006	4.05197	2.17026			13.3058	2.15644	1.47893
		1.62648	6.45793	5.59527			9.96634	7.23243	8.37099
		1.16757	1.51204	1.31429			15.965	2.3953	2.84074
		6.8809	6.39489	4.87409			9.36669	12.7029	3.27438
		4.28307	2.57047	2.31461			20.2834	4.79784	3.2088
		1.69014	4.54449	4.04003			64.1068	52.2696	2.56637
		8.726	1.10472	1.34349			12.3935	12.8926	3.16865
		4.42089	4.31153	5.95922			21.0434	18.513	5.20636
		1.49986	2.64385	1.3873			6.07484	4.71409	3.67925
		1.62229	4.07659	1.73329			19.5534	14.4514	1.57997
		8.15795	4.76908	1.51873			6.20297	9.75027	2.95718
		3.70069	5.38325	1.22891			28.576	2.52559	1.01383
		6.98374	1.19239	1.79001			1.75941	11.0826	2.53358
		1.59396	2.93296	4.58315			47.7538	28.954	4.24472
		4.5587	1.34113	1.56647			1.97687	17.3963	3.65917
		3.21869	4.10713	1.49851			13.8849	18.7948	4.48496
		2.91438	3.1935	1.28227			5.64505	6.81107	1.51172
		2.29527	8.1522	1.83045			17.8562	22.1549	2.62459
		6.00785	5.45417	1.34518			9.8814	16.9331	3.04752
		3.97667	2.70591	6.99717			6.72794	26.7671	4.26546
		3.16447	10.9684	7.38191			4.17851	6.69268	4.08746
		2.90214	2.75221	2.71507			4.46113	10.4674	2.50882
		1.91191	3.73577	5.02237			8.90029	4.44938	1.42338
		6.76268	7.37156	1.79001			9.087	27.1306	2.61656
		1.66601	3.11224	1.31878			11.3977	11.839	2.20367
		1.45124	1.89226	7.42235			3.56495	9.84591	3.97436
		1.33791	2.28185	1.16488			2.85694	36.4408	1.48026
		6.10823	2.20305	1.47941			4.35204	27.7132	2.73166
		6.30726	2.00357	2.13319			7.74639	11.8772	2.13942
		4.09349	1.09832	3.09588			1.96369	6.39488	2.42919
		5.21524	2.59214	2.09219			1.65857	12.2298	3.25564
		9.83656	2.32618	10.6328			9.26451	5.23574	1.97079
		3.38449	1.42141	2.01468			1.5304	2.91541	3.72877
		2.4058	3.54566	1.55355			5.07873	4.64894	2.01495
		1.08642	1.27661	1.81641			9.56774	31.7237	2.35223
		11.555	2.49659	1.44852			1.16016	11.3628	3.9757
		3.9242	3.12504	3.74628			3.89595	20.4591	1.05131
		1.71358	1.5933	1.79282			7.63442	5.08892	2.96053
		4.4793	4.72869	2.53815			4.44211	38.0958	3.67791
		1.34246	2.35425	2.37358			2.4711	9.1495	1.81219
		2.17529	12.7292	2.14161			7.40323	18.7193	1.62146
		1.27705	2.95906	1.73497			3.74099	25.4539	1.41067
		1.32812	1.69378	1.39854			16.3285	8.46757	1.5251
		1.58976	2.86499	1.09861			1.96347	5.79929	1.49432
		1.32847	1.37364	1.41145			2.34126	7.34928	2.96454
		2.92907	5.14733	1.46425			5.35097	9.83557	2.80394
		1.86259	3.01275	1.01492			2.57832	42.9562	1.12827
		1.12385	1.44604	4.18774			3.01138	30.8375	2.45796
		1.06718	5.86937	1.2907			4.43708	5.56974	2.20634
		1.57577	6.52491	1.49065			3.55838	4.58845	1.98283
		1.3631	3.5757	3.05656			8.29618	7.903	1.83494
		7.69764	12.1682	1.60579			24.5225	2.32189	2.93644
		8.61582	4.85675	1.46537			1.3101	4.03732	7.06338
		1.97627	2.50545	2.6179			3.86328	24.15	2.41915
		1.50126	2.93542	1.44178			3.07672	8.59734	3.00737
		1.01647	5.48963	2.94591			6.10151	10.2352	1.17712
		1.05844	1.36527	1.30474			4.10369	39.5967	4.30428
		1.55058	11.7895	1.65971			4.53174	6.87156	2.07987
		1.22843	1.97501	1.07109			2.647	14.3294	1.48829
		1.63978	4.37506	3.91758			2.94353	19.7177	1.57328
		2.47505	2.90834	1.59062			27.2164	11.2129	2.5289
		9.41892	4.74002	3.33121			9.48314	4.66135	2.95651
		81.5449	9.93168	1.32159			1.04959	5.73259	2.25653
		20.0845	4.81143	3.32222			3.24342	2.72722	1.64087
		11.1098	2.57342	1.8063			3.97972	17.722	3.05355
		5.47408	4.35044	2.24159			6.48935	10.9554	1.00647
		7.64413	9.50368	1.81079			5.93817	16.7175	2.36427
		2.62441	3.17134	2.15846			2.61266	13.0757	4.1691
		4.78046	6.99035	1.78159			3.13703	8.81862	1.39126
		1.71988	5.44777	1.18567			2.55905	17.9635	1.5599
		1.77584	9.42586	1.57602			3.2275	19.0156	1.00714
		6.34224	8.77179	1.32271			5.08375	15.7134	1.73054
		7.9292	8.7974	1.15758			3.71837	11.7868	1.38323
		3.66606	5.80436	1.22442			2.57078	11.0081	2.0183
		1.11615	1.6923	2.7336			2.51884	11.6327	3.71405
		3.1225	7.13268	1.54513			2.41162	20.7445	1.66095
		9.24857	5.50195	1.10591			3.15044	31.2403	2.46332
		5.32927	4.81685	1.0812			3.28698	16.2217	1.25742
		3.31313	6.01713	1.35192			3.58351	7.63674	3.21616
		2.59223	4.34748	1.13399			2.06064	5.20576	2.89026
		2.60412	2.90292	1.17724			4.94219	23.116	3.24159
		2.15046	1.68245	1.18791			1.22968	11.9481	1.02789
		3.41736	1.43668	1.31372			10.3886	47.0116	2.2746
		3.78044	8.42063	1.99783			2.00954	6.31371	2.18359
		8.70571	2.52909	1.0475			6.91069	1.2036	2.41848
		10.3707	1.07517	1.23397			4.77382	1.33233	1.27081
		1.53554	4.15638	1.10254			2.13436	21.2842	2.50815
		2.03573	2.89651	1.64061			5.40374	3.5839	2.45328
		2.29247	7.45972	1.34742			5.30908	7.58814	1.80951
		2.01999	3.30678	1.93998			1.26822	7.07165	1.26411
		1.12735	1.75781	1.02784			4.16903	4.38837	3.71405
		2.12142	4.66762	1.29575			2.65622	5.9394	4.30562
		1.16442	7.08195	1.3244			4.61131	3.50791	1.44881
		2.11968	3.5954	1.8473			1.94756	4.50883	3.52065
		4.03928	4.69422	1.22723			1.90651	11.0376	5.01095
		1.50091	19.6432	1.22217			3.90349	12.0013	9.21552
		3.41142	3.92539	2.3483			3.91606	14.8283	4.77071
		3.10431	3.57274	1.35248			1.76076	24.9193	3.04886
		5.92635	2.9438	1.41033			1.89311	9.25446	3.09169
		2.17739	14.3915	2.25282			2.42	10.9901	2.20969
		1.65342	3.46439	1.46593			2.389	20.093	3.45908
		4.99768	6.25058	1.9265			1.13251	2.79495	4.90856
		4.46776	2.37149	2.88132			2.97955	15.6835	2.21504
		8.53362	1.7583	1.2862			3.65219	34.4297	2.0792
		1.80207	2.02918	9.7274			2.30691	13.9939	2.09793
		1.41347	1.38152	1.04525			6.82022	21.5706	3.71471
		1.46139	2.73694	1.48615			9.37006	73.2384	4.49968
		1.46628	13.2862	1.10984			6.228	15.2771	2.733
		1.27251	15.2046	2.2927			16.2807	19.0745	3.42629
		1.08013	5.89055	6.08784			4.94973	8.63405	2.53358
		1.37009	2.11784	2.36235			12.7374	5.18353	3.1459
		1.38374	1.09093	1.52435			4.2997	17.4733	3.80171
		12.4599	3.9643	1.87876			4.62974	4.65928	5.2271
		23.0587	2.42123	1.7726			10.0904	13.5291	1.26746
		74.7798	5.36995	1.41145			3.37074	11.7795	3.37409
		11.42	1.40516	1.61028			5.78823	9.74045	4.94804
		17.5923	11.3393	2.80325			1.73228	6.92844	6.98508
		50.8135	1.36527	2.3337			5.32165	120.262	2.32613
		18.4118	4.67304	1.38674			3.1119	31.2097	3.97236
		10.2364	3.1738	4.16921			2.21477	2.92937	2.5831
		20.9558	7.26616	1.77148			7.45433	24.4488	8.46401
		5.57272	1.95383	2.18486			3.9772	2.45786	2.63195
		33.9592	3.30235	2.08039			2.90333	10.2151	5.01296
		7.01417	2.89848	1.39404			5.49169	5.76361	6.79436
		59.2659	3.33535	1.26037			4.08945	6.24443	4.89518
		26.0916	7.78527	5.42059			2.20472	9.74355	2.65471
		4.98194	2.58229	7.87168			2.59004	6.90155	5.00091
		1.61844	8.50682	2.23541			6.53626	52.4485	1.78809
		26.5876	11.3191	3.25651			5.97502	30.2305	3.84119
		1.28475	1.23967	2.60667			2.91087	13.6614	1.24538
		1.31973	2.4365	2.95153			1.77584	2.66156	7.42876
		3.7689	9.0348	3.43905			1.71469	3.61286	1.19117
		4.6507	1.82971	4.55675			3.19399	18.1661	2.21906
		7.74067	1.84942	1.74171			2.12933	3.31247	3.2978
		4.02004	2.50102	1.91863			5.31662	6.66373	4.28621
		101.225	8.86439	1.71363			2.18294	4.98552	3.40755
		12.101	8.19604	2.93749			4.75958	1.99048	3.5434
		10.5403	2.99157	3.29583			3.70664	9.05179	2.01964
		14.1543	6.71355	2.30674			2.71485	7.59744	6.53337
		5.72173	4.99613	1.65184			1.83699	2.41857	5.1662
		5.48387	5.84622	4.13439			2.98123	27.3048	4.37923
		28.8325	2.99403	2.95995			2.72323	16.368	2.48005
		3.45409	1.81642	1.43729			2.58585	10.2704	3.48853
		10.4753	4.24701	2.35841			6.76829	5.29727	8.17023
		5.36075	3.54664	8.28899			5.13485	14.622	3.84119
		2.03153	2.40104	2.92738			3.21661	5.3164	5.43723
		16.3016	4.61344	1.96132			2.0841	3.12946	2.67277
		8.34894	1.87552	2.56904			6.72892	13.5394	2.9351
		13.184	4.09235	3.27111			4.10453	15.3748	3.99778
		18.2999	1.72037	1.70576			3.18981	12.3803	6.71606
		1.03885	3.6811	1.24801			4.02076	4.30978	5.89897
		1.46593	8.7186	1.31429			2.23739	12.8166	5.91972
		25.4368	1.94743	1.50637			2.17121	16.7133	2.67679
		1.78389	3.96873	2.00738			2.46858	37.9681	5.93177
		8.81659	3.26049	2.59768			4.62472	15.3877	2.81665
		28.6286	1.05892	1.72879			1.81437	6.63684	4.87176
		17.671	1.14757	1.2935			1.92075	14.211	7.61814
		80.0895	6.43626	2.36459			6.73981	12.127	3.43633
		26.114	1.91098	10.616			1.80934	10.5702	2.82201
		15.9913	4.47504	1.52042			2.36136	27.6398	4.91927
		22.5791	4.43219	1.53109			3.15379	13.6558	2.32948
		30.4345	1.41206	1.24464			1.84872	11.3432	2.9612
		9.23249	9.31357	3.19417			5.25464	7.54367	3.39685
		16.8262	2.71231	1.80799			6.1258	50.5314	2.6353
		15.4023	2.51382	1.90066			3.74266	5.23316	4.70245
		9.03241	6.09347	1.64623			2.19718	11.398	3.69865
		3.77519	1.53666	4.31468			1.44831	7.21072	8.56037
		22.5032	2.41434	1.72374			1.61249	37.3368	3.50659
		6.54127	4.78976	1.97705			3.75774	14.2974	2.10463
		11.9265	8.56346	1.62039			4.71602	21.5536	4.29156
		8.83828	3.0689	3.67888			1.24811	10.578	7.14837
		8.26044	6.20724	1.2452			2.78187	2.78461	2.54027
		10.7953	5.00746	1.16769			2.17875	3.64181	3.64445
		10.3388	3.19301	1.71756			3.04405	51.9046	3.09704
		21.4521	2.67931	2.02535			1.60412	7.06854	5.08456
		19.1411	1.15398	2.29888			1.30675	21.6332	2.63597
		2.34738	1.17713	1.04469			2.57832	12.0416	5.92976
		28.0007	3.83772	1.9939			2.98207	6.92843	2.17958
		1.6814	1.14905	1.87482			1.75322	10.1944	3.44837
		50.2251	8.41865	1.36708			2.31864	16.9843	2.71092
		13.0136	3.46291	1.10647			3.96632	8.52651	5.03705
		11.0611	1.25839	1.50188			3.07337	20.5568	1.21526
		40.9745	3.39051	1.24801			3.63712	26.7645	4.10686
		18.4996	3.23882	1.40134			2.48533	8.5353	15.597
		41.2322	4.12141	1.74171			2.98625	51.4119	7.38258
		7.97362	1.06237	1.14635			3.63628	55.5247	2.70088
		11.8782	1.65339	1.01548			3.99061	20.5919	3.71137
		11.6488	2.39464	1.31204			3.32802	17.037	1.98685
		17.1204	1.4884	2.13937			3.3121	14.5088	3.13318
		3.20435	1.6992	1.31766			4.64398	8.45723	2.21437
		4.42684	4.72721	1.7917			3.20237	2.32682	1.10953
		6.29257	2.34243	1.05536			2.80281	4.85388	3.67122
		8.69347	6.52738	1.57714			1.84117	1.33289	2.54763
		23.0034	10.2045	1.56254			7.5205	1.58861	3.79234
		16.3841	6.98197	1.95289			2.28765	2.11996	2.90365
		14.5397	3.92047	1.81079			5.32081	47.9134	6.29581
		9.05095	6.07573	1.45077			4.14976	1.70803	3.05154
		10.4948	6.30722	1.95402			2.28848	4.01254	3.49589
		9.94429	9.32194	1.57939			2.19299	1.54579	2.75174
		5.49332	6.61948	1.09468			3.05494	1.61997	2.14678
		40.9741	2.98074	1.08569			3.77282	1.78764	7.49233
		12.9069	12.7277	2.51961			4.89779	1.08923	3.4283
		25.9625	1.49234	1.71082			5.26301	4.47091	2.97726
		13.2721	3.46291	1.49963			2.81872	2.3799	5.90031
		8.22406	4.93703	3.48511			4.28211	3.90217	5.87421
		4.3261	8.43737	1.27609			5.6986	2.64105	2.26657
		4.66014	3.82295	1.38449			1.59825	1.99149	3.06492
		2.42504	3.43976	4.70279			5.26301	6.14998	3.39818
		15.0875	16.1611	1.01661			2.32953	1.4909	2.62258
		1.82376	2.20354	1.24183			1.9174	7.60048	2.98797
		2.46631	1.00474	11.9325			2.52135	5.29476	4.71115
		11.7303	3.25556	4.78816			1.58904	6.99857	7.09885
		15.1728	6.39932	3.25426			1.40392	35.3698	2.11734
		2.18858	4.04458	2.00906			2.01541	4.76704	4.5666
		2.91263	12.7139	1.47211			1.50025	1.10069	2.18493
		16.4953	13.7921	3.894			1.13587	17.6442	2.7049
		74.8529	6.29195	2.3118			2.10923	1.31841	3.78097
		3.46703	7.77936	2.87683			1.10571	1.10853	2.97391
		75.0677	12.579	1.82315			3.68486	1.25026	5.08657
		34.3342	1.63024	6.73038			1.02613	6.80497	1.85167
		35.3066	6.07278	2.26518			2.70731	3.39494	5.90299
		14.2889	1.21456	2.16015			1.38214	11.654	2.76646
		4.08755	3.0157	2.29888			1.73479	5.40272	2.8722
		10.2804	6.96178	2.05119			2.81118	4.5656	2.12604
		17.6643	1.8238	1.10142			4.5242	19.5705	2.48272
		27.5089	4.90156	1.21712			4.96397	1.27981	4.70513
		68.5726	6.01811	2.01243			8.78956	2.50233	3.06158
		12.3207	10.0652	2.75101			3.23085	2.68809	3.31052
		6.18274	2.36705	1.7097			3.88087	1.79065	3.37945
		23.2633	4.03867	6.56357			4.5887	1.73758	1.47558
		9.69454	8.88803	1.94784			3.51901	1.14592	6.39284
		2.20467	2.86844	2.63363			1.73898	8.42675	3.37476
		17.679	7.12677	1.11265			2.50963	7.30978	2.79122
		19.4454	3.65795	1.76923			3.92443	2.28581	3.99778
		48.3146	5.367	9.47297			5.44311	3.67419	7.75867
		1.27251	2.75959	2.02872			2.65119	1.79488	3.83584
		9.12475	6.04717	7.52906			2.26168	4.91842	4.30227
		1.63103	2.25525	5.49024			2.55486	1.19839	3.76691
		6.66369	4.13225	5.24423			1.19785	1.7798	1.63217
		9.37275	1.28055	1.13287			2.40492	11.7149	2.72096
		8.69207	4.58931	1.87089			1.90819	3.60181	2.13809
		1.83181	4.62083	2.18992			1.80934	2.49148	2.52287
		55.0864	6.5323	4.04171			5.60143	14.3644	1.96543
		37.8404	10.5065	1.12445			3.62204	6.9853	2.8916
		4.64405	7.44691	1.90852			3.76612	6.71269	2.71962
		8.91488	27.4851	2.22362			3.32132	16.2154	4.66832
		40.7817	1.22884	3.35592			3.31127	1.94384	4.04798
		14.6663	2.3774	2.53478			1.23806	3.50652	3.89674
		1.42186	2.40941	2.15004			1.90316	2.61632	2.26055
		2.67688	4.94195	3.16159			2.45183	5.67231	3.98105
		12.1846	6.42099	1.14747			4.70011	1.28705	1.59871
		44.6937	1.07025	1.24071			3.40676	10.3833	1.78542
		10.137	4.54498	1.09411			2.35717	11.8506	1.35312
		45.0326	1.3766	1.07333			2.46272	7.33752	2.38033
		26.1717	11.1984	2.22811			2.69308	3.2116	2.37766
		38.7911	3.50675	2.82965			2.17624	15.3541	4.9012
		22.8005	3.40824	1.09748			1.44664	4.53182	3.42361
		33.4468	1.4815	1.12445			5.93566	2.81535	2.74906
		13.4229	6.41656	1.55243			2.49204	6.3659	2.2659
		11.2958	1.58247	1.88213			2.14943	3.2701	1.16106
		52.9576	11.163	1.60186			1.07555	1.08621	2.38636
		17.8042	10.1085	7.61331			2.49706	2.32079	3.17266
		12.2053	4.17707	2.3674			1.68956	2.60908	2.48072
		17.4824	3.71065	2.57746			2.09415	1.1031	2.2378
		24.1902	5.23156	2.64149			1.02697	2.88893	2.4419
		17.5132	1.24115	1.51424			1.02865	1.4698	1.57931
		36.4791	3.68504	1.94559			3.23923	21.1356	2.81331
		40.1682	3.88303	5.38127			3.42854	21.6242	2.39773
		6.48985	3.88993	2.17756			4.82827	8.98885	5.20368
		9.10306	6.59928	1.5822			4.18243	4.84966	1.86304
		14.3956	4.28739	1.04862			2.81035	1.41853	1.31564
		3.86614	9.35592	2.58252			1.24225	17.4415	2.12403
		7.21704	2.7724	1.40134			2.06734	8.69152	2.18158
		18.805	3.90569	2.53084			3.87753	5.98594	2.61857
		11.8286	1.16875	2.6516			4.10453	1.70863	3.42629
		18.5349	4.95574	1.65072			1.57899	1.38234	3.69397
		44.0749	8.71909	1.91302			4.6733	4.49503	2.39439
		2.15395	2.36952	6.38215			3.01976	3.23874	2.03905
		67.9772	11.8402	2.06972			15.6064	1.87268	1.13027
		6.63396	2.73004	1.16826			2.52052	1.92334	2.79658
		3.47718	2.65518	2.59319			2.00117	1.18935	2.15883
		9.768	2.32125	4.08103			3.5634	1.1025	2.71761
		14.6905	1.21997	1.45526			2.6981	1.88655	3.05756
		3.1162	5.59306	1.84225			1.42151	7.11376	2.1963
		7.15898	9.13084	1.45639			2.68972	2.51862	3.03414
		9.48118	1.08552	1.0885			2.1419	1.77558	1.8597
		2.70661	2.58869	1.1149			1.81437	1.14653	1.73924
		13.8003	2.29219	1.42044			2.53392	1.82986	4.38726
		4.27188	2.51924	1.96637			2.39319	1.61454	1.87643
		40.7345	3.36983	1.47941			2.57245	1.72009	5.33417
		7.67141	1.20668	1.49626			3.53408	1.18151	2.66876
		10.7901	7.38288	1.10928			2.2843	2.77434	4.0279
		11.6288	6.1373	1.27272			2.32283	1.14894	3.1285
		1.02521	3.30875	1.04244			1.84285	1.43602	3.43097
		9.51056	1.28006	1.63499			1.19785	1.11456	2.88692
		9.29964	2.53599	1.62713			2.14357	1.1218	2.4419
		57.8581	1.43767	1.51368			3.21326	1.09104	2.26055
		28.0735	1.48002	1.21038			2.50125	3.16455	2.82736
		48.5591	4.8927	1.16713			4.42535	1.17306	1.16775
		69.589	4.8597	1.69341			4.55435	2.19715	1.9032
		4.10644	2.99354	1.36034			1.80432	1.99089	1.60072
		2.12142	1.58148	1.11377			3.97469	1.28042	5.83139
		7.34401	5.05966	1.31597			1.20707	1.14472	3.44637
		70.1886	4.21105	1.043			4.60629	1.3926	3.23088
		3.47473	1.90704	1.29575			2.30524	4.34847	1.21928
		49.1684	2.76304	1.04469			2.52973	3.80687	1.89784
		13.9458	6.6643	1.3946			1.36873	4.92264	1.94201
		37.7796	1.5145	1.12894			3.29535	9.78497	5.80529
		22.3542	3.24325	1.13624			1.19366	3.20677	2.01094
		11.8957	1.22785	1.08344			3.01809	2.27737	3.76691
		3.08227	4.67205	1.60972			1.40308	1.95169	1.38323
		8.02854	4.39772	1.32159			2.37811	16.6104	2.41848
		29.2354	5.26997	1.05087			2.69978	6.84176	1.79144
		14.7692	2.1006	1.22779			2.73161	1.56931	3.90677
		3.7563	5.4724	1.80855			1.38549	1.7026	2.15549
		3.47858	1.21308	1.14242			3.34645	7.0239	4.34376
		8.35313	4.7218	1.14803			1.68872	9.36701	2.29735
		8.76308	8.35364	1.71475			20.9172	7.70602	4.12159
		7.42201	5.84671	1.41089			2.58418	2.71282	7.94605
		5.03335	1.90852	1.27722			2.55486	2.27194	2.08856
		10.3074	1.0732	2.27136			6.18528	5.48716	1.46688
		19.6584	2.36164	1.5558			6.09397	6.13249	2.24516
		16.658	3.3649	1.74283			3.76695	3.00171	2.62258
		5.24602	4.29429	1.26261			2.06148	3.3093	5.47069
		1.7615	2.04593	11.7028			2.02797	7.62762	1.56994
		59.0354	5.09463	5.07124			1.50025	9.52683	6.02478
		6.99388	3.56437	1.03289			3.81135	2.06929	2.16753
		31.4237	4.14407	1.92706			5.37191	1.48186	1.20456
		10.3745	2.51038	2.24496			4.66744	2.16338	2.19162
		3.30124	5.70979	1.08794			4.81151	2.66517	2.04908
		1.42466	5.41871	6.34059			2.68219	2.90823	1.64623
		2.22356	4.84246	1.30699			2.79359	3.28397	3.07162
		19.458	5.37389	1.78777			2.83966	11.3398	3.18605
		15.1078	9.01362	6.59839			3.55838	2.88652	3.7281
		35.2059	7.3883	1.84337			4.51415	2.75685	1.88446
		6.69132	6.64804	3.39019			6.36202	2.96372	3.73881
		6.0904	12.6287	2.34156			4.15647	4.53182	1.09347
		82.9899	2.51136	3.74347			4.24945	1.61575	1.81754
		39.142	3.61658	2.23485			4.21259	13.4465	2.49008
		50.9327	6.50374	1.4255			1.43324	4.59153	1.74928
		84.5936	6.63819	1.40022			1.88222	1.819	1.99555
		49.1212	5.80534	1.82147			4.70346	1.76472	2.23646
		16.9109	2.02377	1.05368			2.40324	1.15738	2.18359
		41.3767	3.984	2.00008			2.90416	11.1655	1.02588
		13.6492	8.35758	2.07702			1.13	3.6573	1.73456
		3.849	7.04009	2.55499			3.33137	1.77316	1.01049
		62.875	1.59626	8.39515			4.02663	2.77796	5.80863
		19.5731	2.30549	7.79136			3.81805	1.86725	2.32881
		12.1063	6.83126	8.32606			4.07186	1.21226	1.45015
		15.7356	1.24509	7.46841			9.44126	1.30394	1.49164
		5.77314	3.97711	1.79226			1.06802	2.06085	2.01897
		9.81032	3.2265	6.24679			3.55921	1.78221	1.5773
		17.721	4.30463	1.89729			1.81186	6.20607	10.6704
		41.4474	4.53907	1.51705			12.3689	1.40948	4.35915
		2.45792	3.4767	4.99485			5.35181	1.53554	1.71649
		16.4719	2.16808	1.67431			1.47344	2.59702	1.73991
		20.1768	8.41176	1.31429			1.32685	1.63384	1.6315
		5.57901	2.2321	2.03153			2.99128	3.61749	4.30896
		7.28035	3.12258	1.71138			1.99949	3.60543	1.48829
		2.07106	5.68221	1.69341			1.39387	1.62842	5.09393
		8.72355	11.8225	2.80156			1.10487	2.1875	1.13161
		6.35133	14.1028	2.16183			1.31261	2.48786	1.12224
		14.4698	8.35315	1.34461			2.52638	1.42698	1.25006
		17.1981	2.66109	2.03995			2.31445	4.82011	4.93065
		3.12075	1.64059	4.25514			1.17607	2.59823	1.38925
		7.50876	3.98548	1.70801			2.67883	4.28032	3.55611
		2.42573	9.90016	1.05648			6.80849	2.48967	1.67032
		19.9788	9.00919	3.77155			2.83045	1.19658	3.81978
		8.14851	1.0205	2.32078			1.37209	1.76412	4.9902
		3.03331	6.34268	2.3			4.3173	2.27013	1.85368
		1.6891	6.99724	1.57433			1.75071	1.2955	1.97547
		1.18996	1.9686	4.37927			2.64449	5.68015	2.06046
		7.99915	10.3735	1.73778			2.19551	7.13367	2.49075
		7.87394	2.54485	9.63361			1.04959	1.57595	1.52911
		10.9093	3.78207	1.35641			3.83564	1.31359	1.31163
		9.06039	3.46341	1.77766			1.50946	1.41733	1.32167
		87.8595	4.94934	1.22667			2.46104	2.04396	1.76534
		50.2286	4.78287	7.47739			5.53106	1.16281	2.31877
		25.9748	4.61196	8.7327			3.00887	1.14954	1.45617
		76.0792	4.50607	1.52547			3.1295	1.23941	1.34977
		6.38351	2.12572	1.46818			3.43775	1.58137	1.78743
		32.8774	2.66946	1.3463			3.88339	3.64886	2.90432
		33.4828	2.61824	1.62769			6.68368	1.30937	2.19162
		2.14346	3.80669	1.49963			3.07086	1.29972	5.01095
		71.4709	4.79764	1.06603			4.44797	1.66038	2.74371
		6.89384	4.05689	2.91951			5.04187	1.78161	1.36048
		33.4682	5.68369	2.72237			1.69375	2.63622	2.62526
		26.3379	6.09544	1.41202			1.21126	47.1028	1.12224
		62.7617	10.3218	2.24777			2.5046	6.82366	1.58064
		9.08383	12.3298	1.64005			1.61836	2.5162	1.63083
		5.56817	9.52978	4.36579			4.49404	17.2986	2.26724
		14.4733	10.7212	1.13568			3.33053	8.81576	4.50704
		35.109	7.79463	3.52049			3.40006	2.88591	6.52869
		9.61619	6.12794	1.61646			2.77852	8.17163	4.53247
		11.7492	3.10534	2.01917			2.61015	4.74171	4.21661
		13.0329	2.5685	1.61365			3.16719	3.87744	2.00425
		2.4037	8.00937	1.91077			2.45769	2.13262	3.36941
		17.0186	4.75479	1.54962			4.61885	11.1667	2.46265
		14.6268	2.81131	1.73104			3.9169	4.95702	6.33194
		21.8606	3.75695	1.37495			1.92913	3.37987	3.34331
		20.7438	5.38965	1.07951			1.33858	6.21029	1.99688
		2.06196	1.26036	1.40921			2.23906	4.30143	3.68393
		1.94618	3.42548	1.16264			3.28698	4.42024	2.37364
		1.39983	1.25544	1.61983			3.26519	1.1797	2.79055
		4.61222	1.16136	1.61871			2.59842	2.28461	3.86796
		1.15918	4.64447	1.50357			4.91957	7.07396	3.174
		44.5373	2.22225	1.38337			1.24057	5.0306	7.04732
		33.0183	4.16131	1.10479			2.88239	1.88293	8.86887
		6.77772	1.97255	1.47773			2.2198	5.805	7.52111
		1.35261	3.42154	1.10984			2.34126	10.8694	4.67501
		66.1794	3.92194	1.462			5.13066	5.69161	4.00983
		23.6508	3.99385	1.40752			5.95073	2.55299	2.00826
		10.0776	4.03424	1.12276			2.76679	8.5335	4.80484
		63.527	5.69994	1.08962			3.61617	5.33276	2.2204
		35.6907	4.544	1.12557			2.04473	7.5667	7.04999
		80.3749	1.28597	1.18847			1.28246	3.38349	4.38257
		43.5258	4.33664	2.34381			4.57697	4.33882	7.19989
		37.4847	5.3734	1.03402			2.83632	1.88293	3.46845
		28.7622	2.21585	1.42662			6.48348	1.60067	4.25944
		20.5836	1.66669	1.93268			3.19986	1.94565	2.37565
		39.4676	6.31067	1.17949			1.00603	2.41789	2.27193
		10.8418	1.36822	1.87932			9.52921	1.48729	1.33572
		51.2136	5.82455	1.42887			1.01776	2.75624	5.8093
		18.274	7.92269	1.49739			2.5557	3.36901	7.48497
		15.9987	15.2829	1.57265			2.63109	4.56379	2.86216
		16.6122	5.88759	1.298			1.43994	2.70196	1.4381
		8.159	4.78976	2.24103			4.90701	1.38777	8.50081
		9.00023	2.72118	1.44852			5.42552	1.24423	2.76111
		24.1223	4.25784	1.01717			4.42368	1.26293	3.4022
		3.16307	2.37789	2.22418			3.80632	1.06752	2.30873
		2.23755	1.24706	1.89055			4.79727	2.94381	1.25408
[truncated: 45,979 more rows]
[truncated: 3 more columns]
