# Supplementary material for: Compartmentalized oskar degradation in the germ plasm safeguards germline development
Source: eLife journal article supplement (doi:10.7554/elife.49988), 2020-01-07
Supplement: supp [file elife-49988-supp-v1.zip › elife_poa_e49988_Figure_8_source_data_1.xlsx]

## Sheet: Sheet1
Figure 8B												Figure 8D
		wt early		wt late		gfp-aub early		gfp-aub late
	nc1_1	1.41741e+07	nc11_1	3.39017e+06	nc1_1	8.91919e+06	nc12_1	2.21974e+06					sample	%oskar colocalized with DCP1
	nc1_2	1.03986e+07	nc11_2	3.81608e+06	nc2_1	1.30752e+07	nc12_2	2.19936e+06					wt-1	33.75
	nc2_1	1.02415e+07	nc11_3	362980	nc2_2	1.76754e+07	nc12_3	1.61473e+06					wt-2	47.3118
	nc2_2	1.13721e+07	nc11_4	2.30065e+06	nc2_3	1.3628e+07	nc12_4	250747					wt-3	26.087
	nc2_3	1.13011e+07	nc11_5	3.70136e+06	nc2_4	1.19076e+07	nc12_5	1.67107e+06					wt-4	41.4239
	nc2_4	1.16455e+07	nc12_1	1.81812e+06	nc2_5	1.34373e+07	nc12_6	1.43715e+06					wt-5	43.7037
	nc2_5	6.33322e+06	nc12_2	2.04764e+06	nc2_6	1.48303e+07	nc12_7	951645					gfp-aub; mnk– aub– -1	44.6429
	nc3_1	1.06005e+07	nc12_3	2.98192e+06	nc3_1	1.03643e+07	nc13_1	933577					gfp-aub; mnk– aub– -2	26.898
	nc3_2	1.11925e+07	nc12.13	1.46041e+06	nc3_2	1.33249e+07	nc13_2	1.07358e+06					gfp-aub; mnk– aub– -3	45.3901
	nc3_3	6.69404e+06	nc13_1	480317	nc4_1	1.14339e+07	nc13_3	806678					gfp-aub; mnk– aub– -4	33.4579
			nc13_2	212179									gfp-aub; mnk– aub– -5	26.0546
	Q1	1.02808e+07	Q1	970365	Q1	1.15523e+07	Q1	938094
	Q3	1.13543e+07	Q3	3.18604e+06	Q3	1.35803e+07	Q3	1.65699e+06					genotype	avg	sd
	IQR	1.07356e+06	IQR	2.21568e+06	IQR	2.02801e+06	IQR	718895					wt	38.4553	7.61462
													gfp-aub; mnk– aub–	35.2887	8.34939
	High above	1.29647e+07	High above	6.50956e+06	High above	1.66223e+07	High above	2.73533e+06
	Low below	8.67045e+06	Low below	-2.35315e+06	Low below	8.51029e+06	Low below	-140248					p=0.5905
													t=0.5604
	High outlier?	TRUE	High outlier?	FALSE	High outlier?	TRUE	High outlier?	FALSE					df=8
	Low outlier?	TRUE	Low outlier?	FALSE	Low outlier?	FALSE	Low outlier?	FALSE
	Minus Outliers
		yw early	wt late		gfp-aub early	gfp-aub late
			3.39017e+06		8.91919e+06	2.21974e+06
		1.03986e+07	3.81608e+06		1.30752e+07	2.19936e+06
		1.02415e+07	362980			1.61473e+06
		1.13721e+07	2.30065e+06		1.3628e+07	250747
		1.13011e+07	3.70136e+06		1.19076e+07	1.67107e+06
		1.16455e+07	1.81812e+06		1.34373e+07	1.43715e+06
			2.04764e+06		1.48303e+07	951645
		1.06005e+07	2.98192e+06		1.03643e+07	933577
		1.11925e+07	1.46041e+06		1.33249e+07	1.07358e+06
			480317		1.14339e+07	806678
			212179
	Avg	1.09645e+07		Avg	1.23245e+07
	Normalized to early			Normalized to early
		wt early	wt late		gfp-aub early	gfp-aub late
			0.309194		0.723695	0.180107
		0.948387	0.348038		1.06091	0.178454
		0.934056	0.0331048			0.131018
		1.03717	0.209826		1.10576	0.0203454
		1.03069	0.337575		0.966171	0.135589
		1.0621	0.165818		1.09029	0.116609
			0.186751		1.20332	0.0772156
		0.966797	0.27196		0.840949	0.0757496
		1.02079	0.133194		1.08117	0.0871094
			0.0438064		0.927734	0.0654531
			0.0193514
	Avg	1	0.187147		1	0.106765
	StDev	0.0495442	0.121208		0.149576	0.0510238
	TTEST	Array 1	Array 2	p-value
		wt late	gfp-aub late	0.0669921
		wt early	wt late	1.47599e-11
		gfp-aub early	gfp-aub late	1.96264e-12
