# Supplementary figures and images for: Compartmentalized oskar degradation in the germ plasm safeguards germline development
Source: eLife journal article supplement (doi:10.7554/elife.49988), 2020-01-07

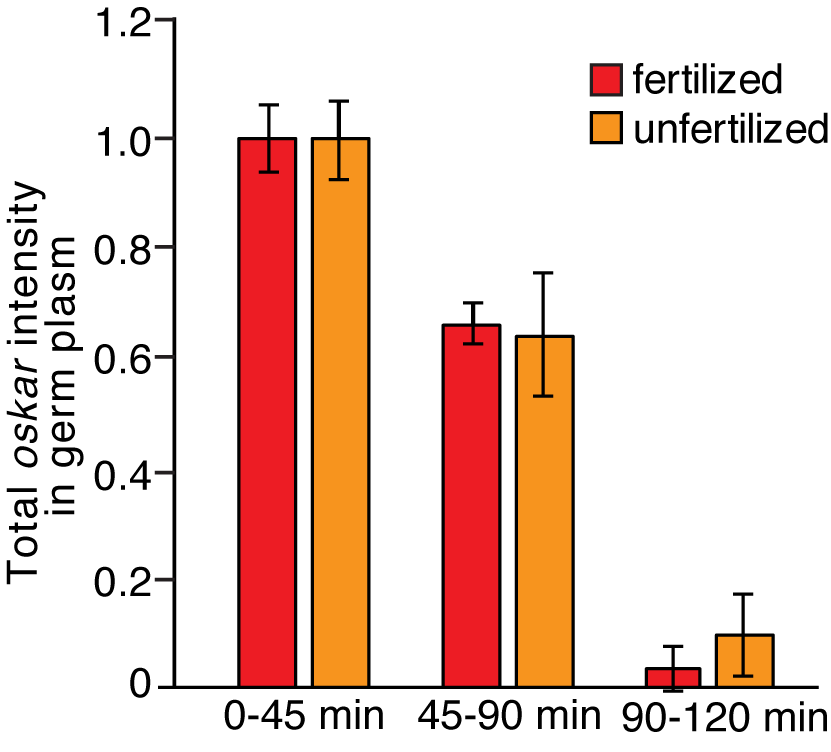

Supplement: supp [file elife-49988-supp-v1.zip › elife_poa_e49988_Figure_7_figure_supplement_1.tif]

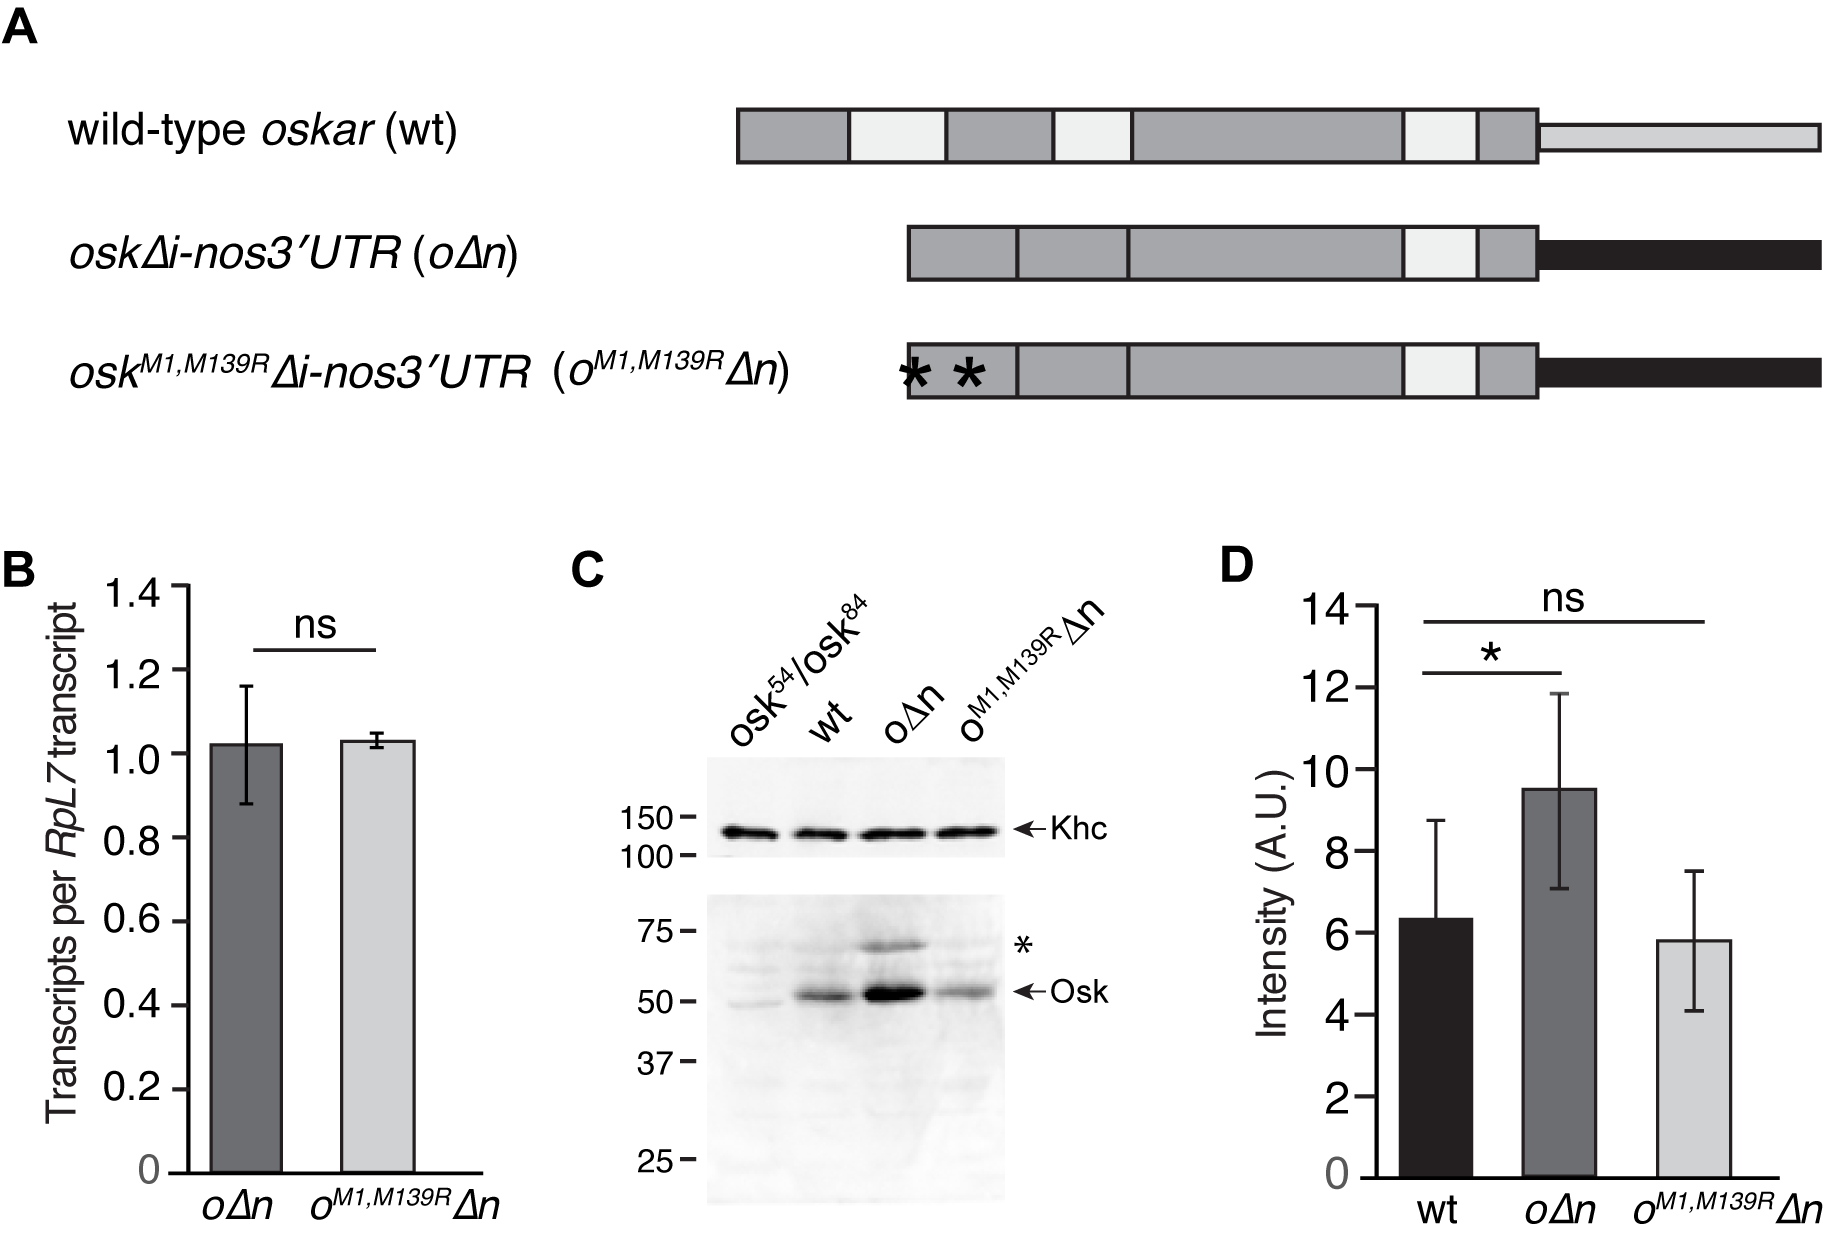

Supplement: supp [file elife-49988-supp-v1.zip › elife_poa_e49988_Figure_1_figure_supplement_2.tif]

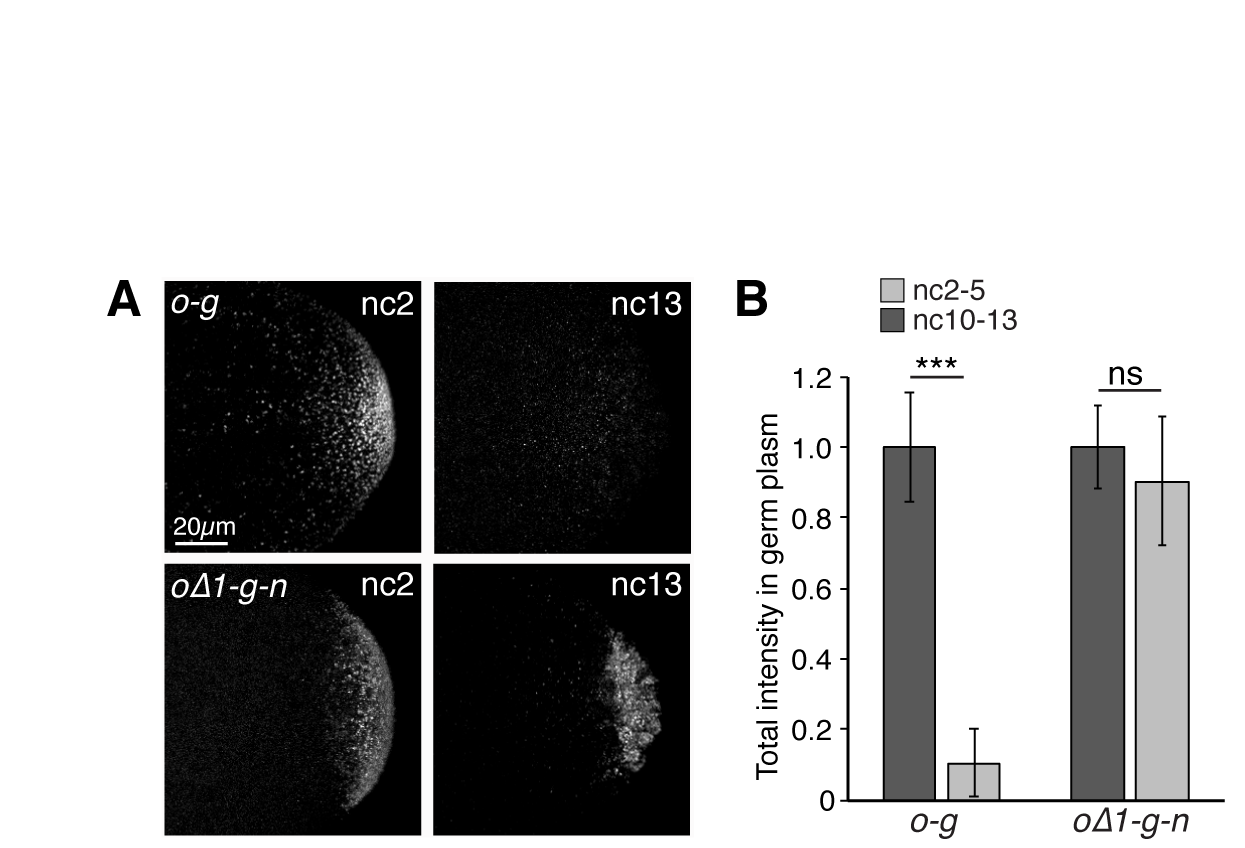

Supplement: supp [file elife-49988-supp-v1.zip › elife_poa_e49988_Figure_3_figure_supplement_1.tif]

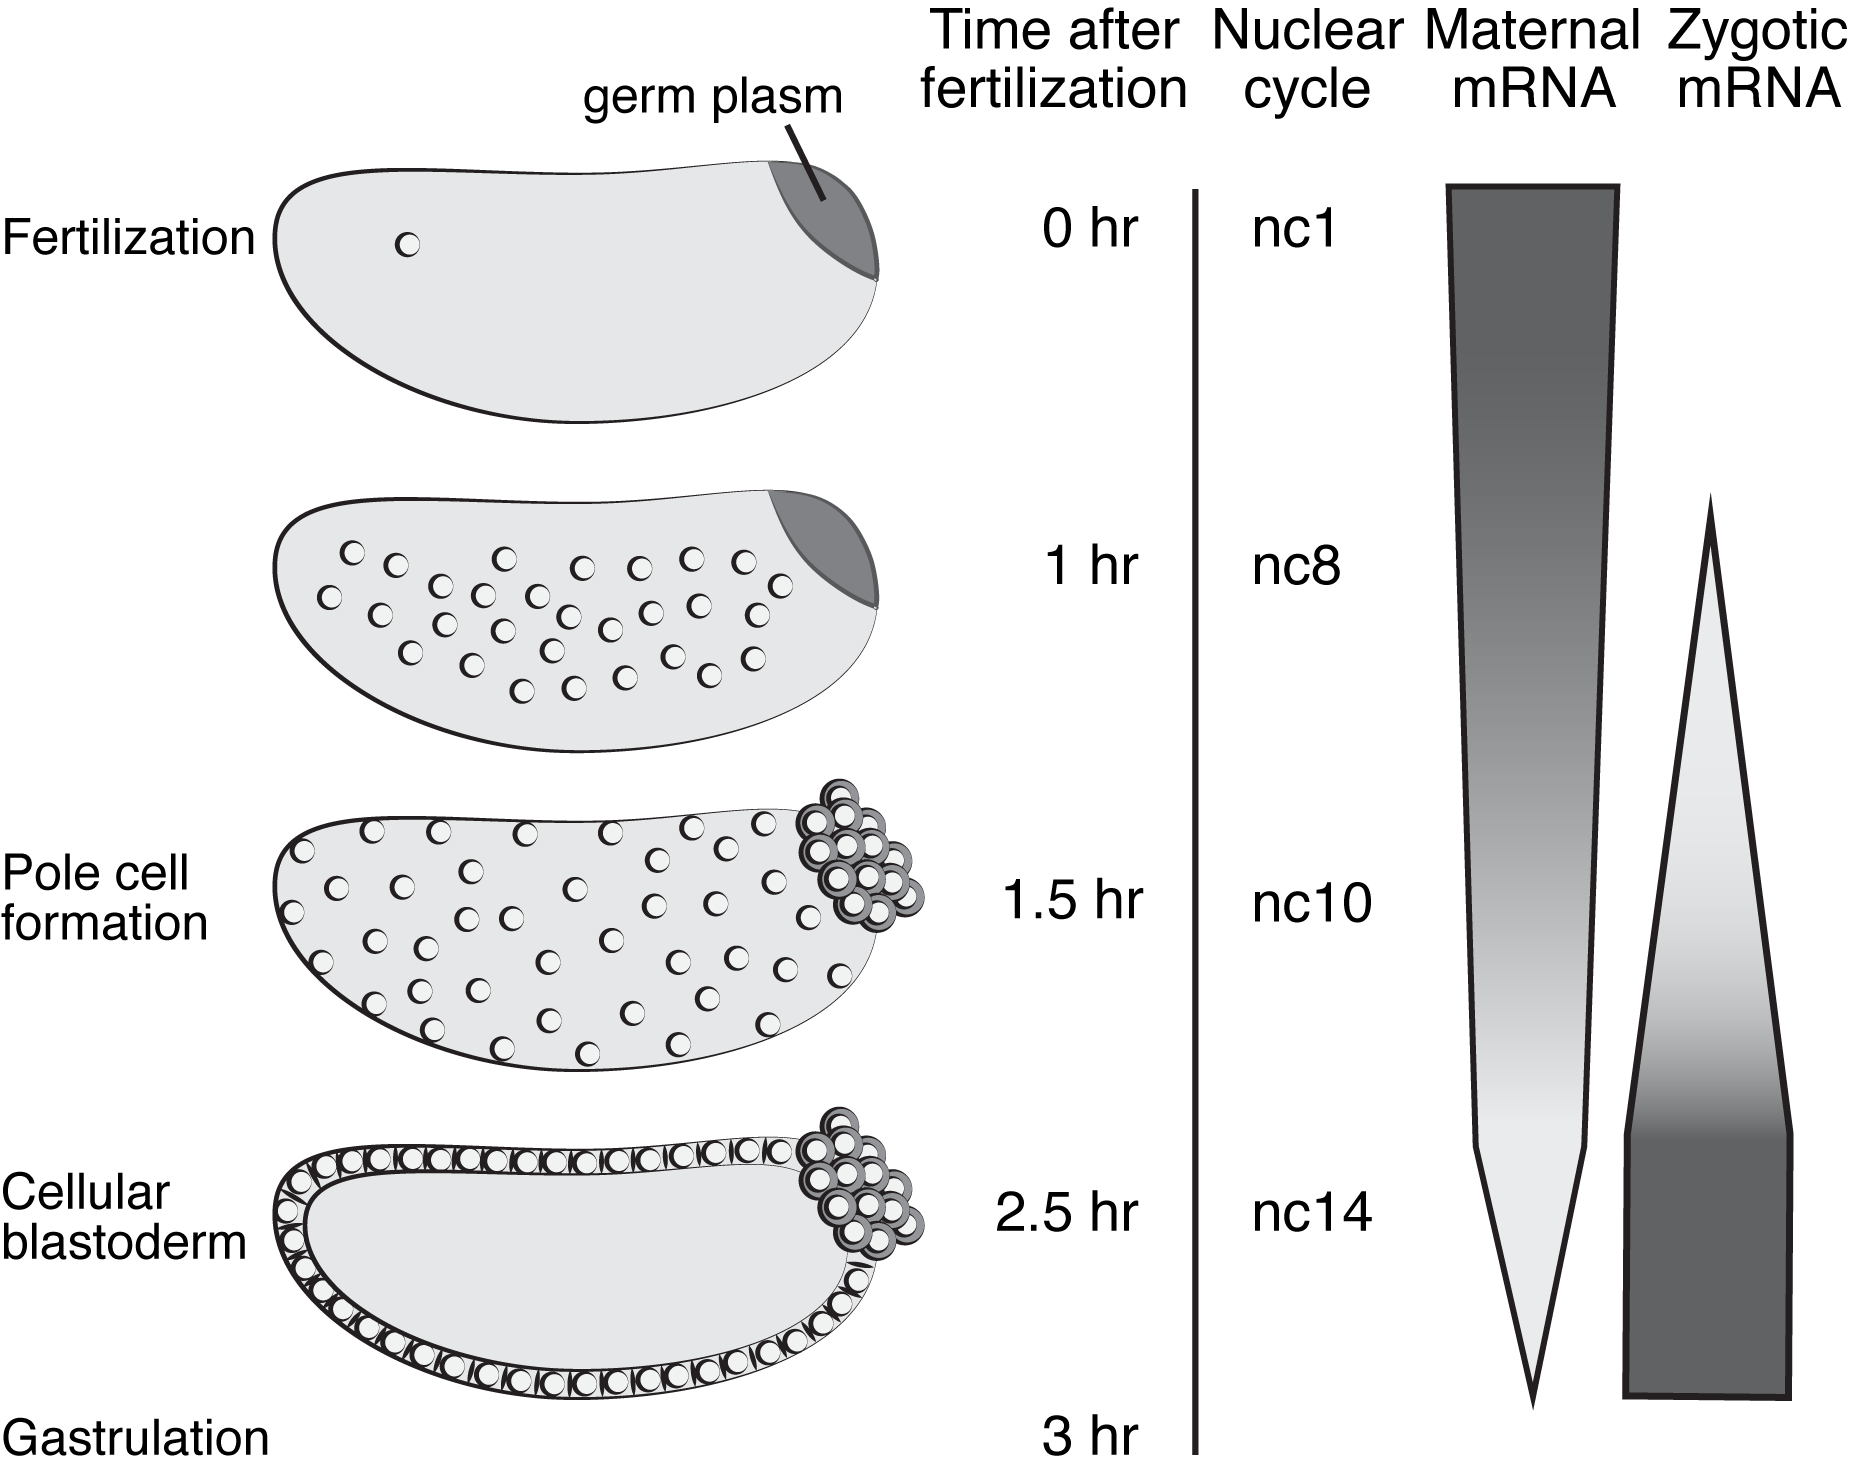

Supplement: supp [file elife-49988-supp-v1.zip › elife_poa_e49988_Figure_1_figure_supplement_1.tif]

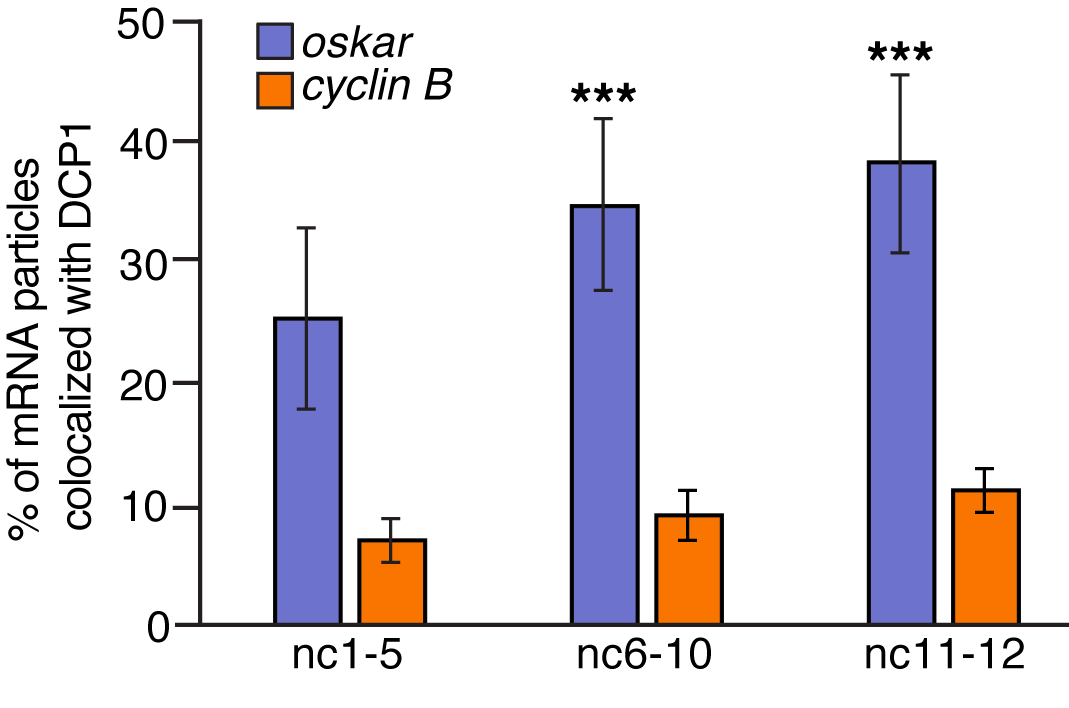

Supplement: supp [file elife-49988-supp-v1.zip › elife_poa_e49988_Figure_4_figure_supplement_1.tif]
